# Supplementary material for: Comprehensive variation discovery and recovery of missing sequence in the pig genome using multiple de novo assemblies
Source: PubMed Central journal article supplement — Genome Res. 2017 May;27(5):865–74. doi: 10.1101/gr.207456.116 (PMC5411780; doi:10.1101/gr.207456.116), 2017-05
Supplement: supp_gr.207456.116_Supplemental_Fig_S2.pdf [file supp_gr.207456.116_Supplemental_Fig_S2.pdf]

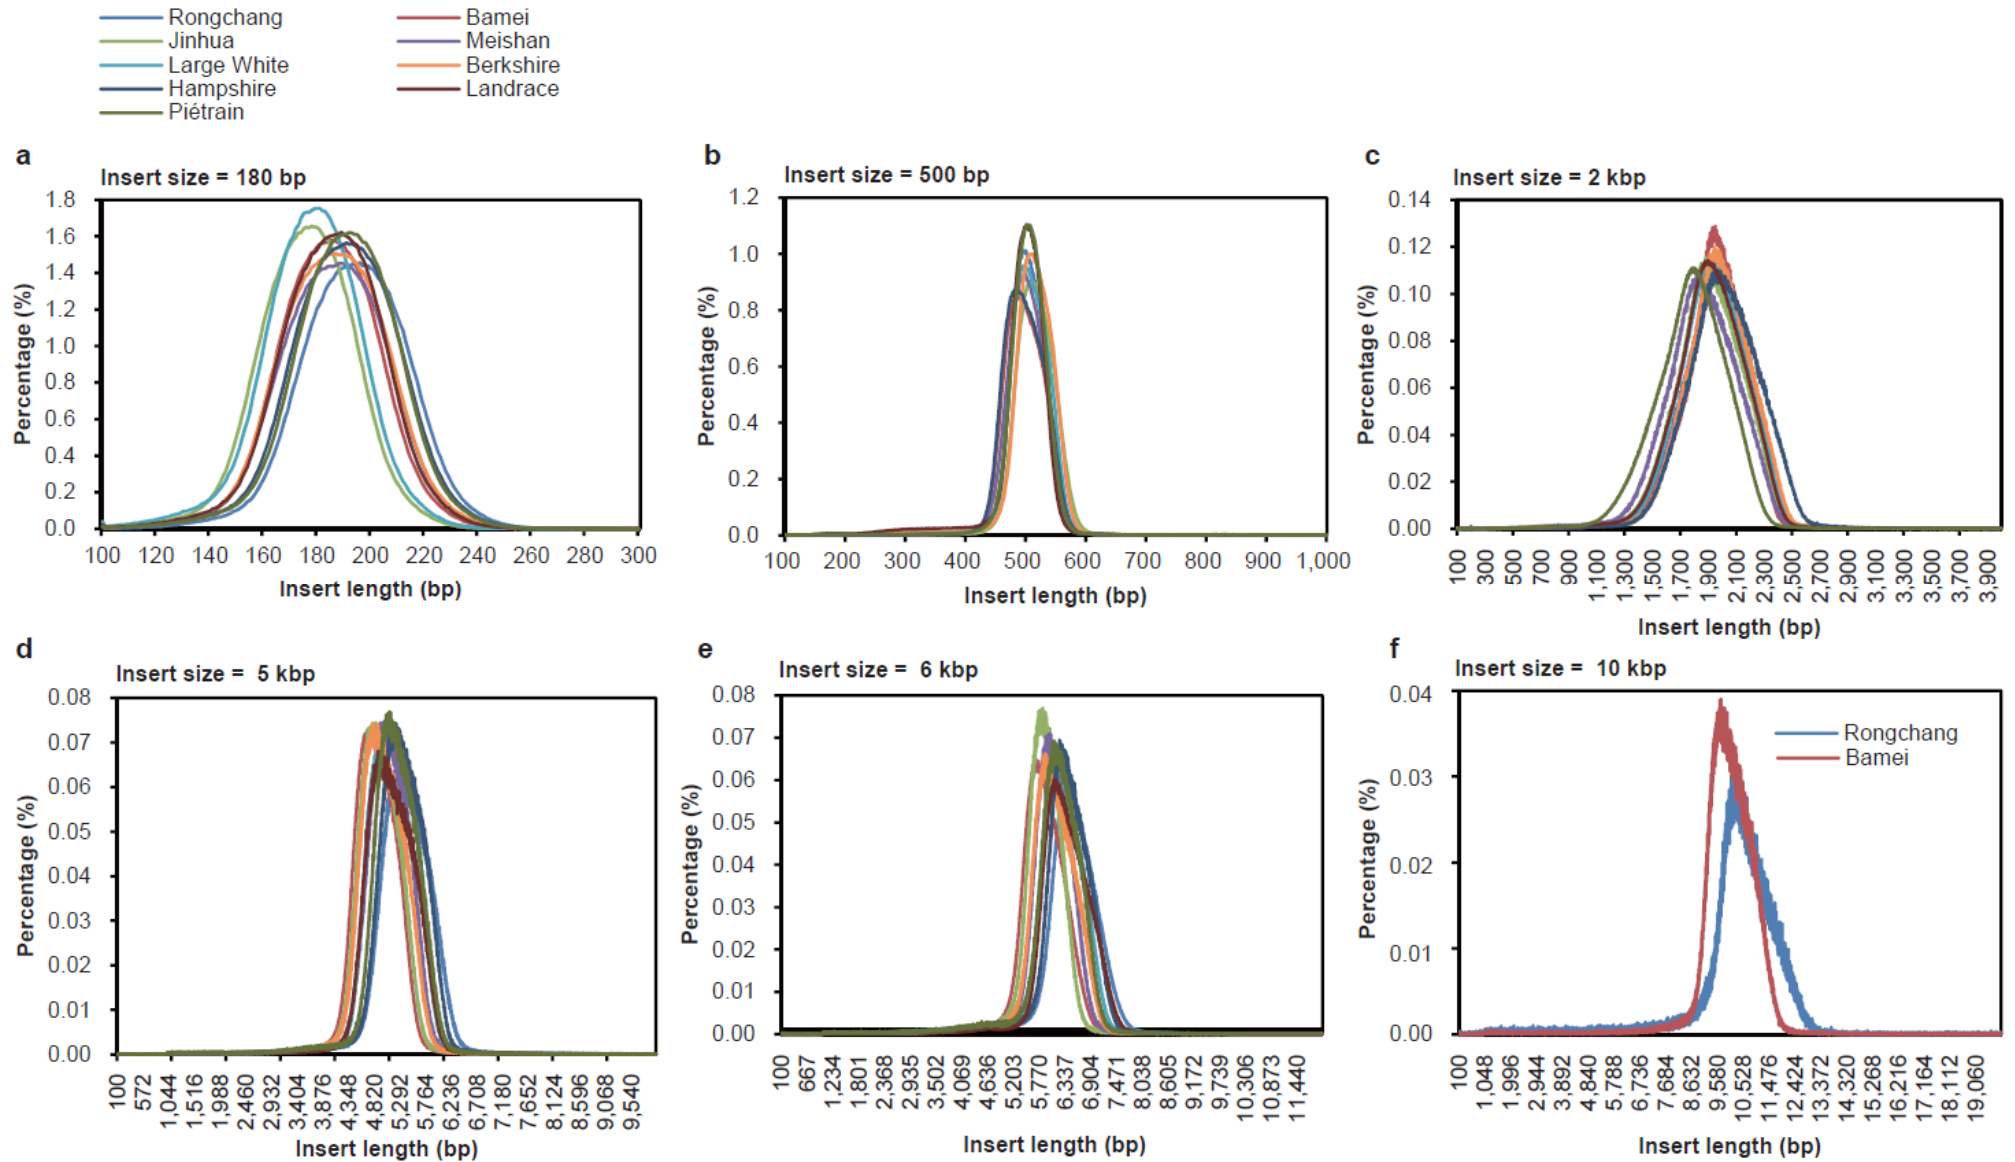

**Supplemental Fig. S2. Distribution of sequencing libraries insert sizes.** Insert sizes were calculated by mapping the paired end or mate-pair reads to the scaffolds using BWA tool for DNA libraries of **(a)** 180 bp, **(b)** 500 bp, **(c)** 2 kb, **(d)** 5kb, **(e)** 6 kb and **(f)** 10kb in length. Both reads in a pair should be uniquely mapped.
