# Supplementary material for: Comprehensive variation discovery and recovery of missing sequence in the pig genome using multiple de novo assemblies
Source: PubMed Central journal article supplement — Genome Res. 2017 May;27(5):865–74. doi: 10.1101/gr.207456.116 (PMC5411780; doi:10.1101/gr.207456.116), 2017-05
Supplement: supp_gr.207456.116_Supplemental_Fig_S3.pdf [file supp_gr.207456.116_Supplemental_Fig_S3.pdf]

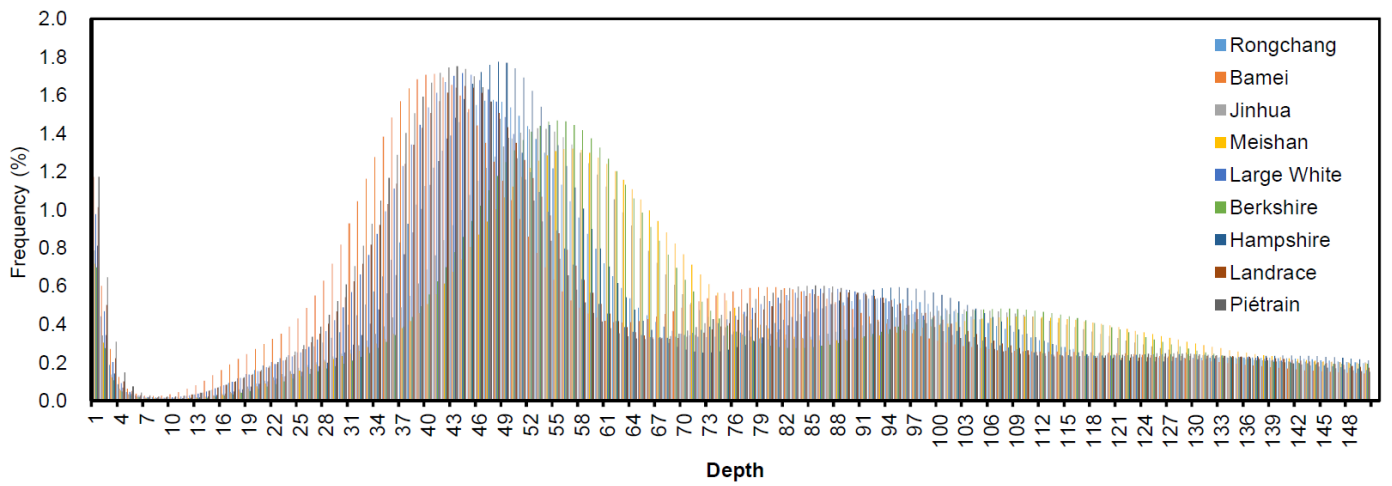

**Supplemental Fig. S3. Poisson's distribution of 17-mer frequencies in nine pig genomes.** About 143.84 Gb of high-quality short-insert reads (180 and 500 bp) for each breed were used to generate the 17-mer depth distribution curve frequency.
