# Supplementary material for: Comprehensive variation discovery and recovery of missing sequence in the pig genome using multiple de novo assemblies
Source: PubMed Central journal article supplement — Genome Res. 2017 May;27(5):865–74. doi: 10.1101/gr.207456.116 (PMC5411780; doi:10.1101/gr.207456.116), 2017-05
Supplement: supp_gr.207456.116_Supplemental_Fig_S5.pdf [file supp_gr.207456.116_Supplemental_Fig_S5.pdf]

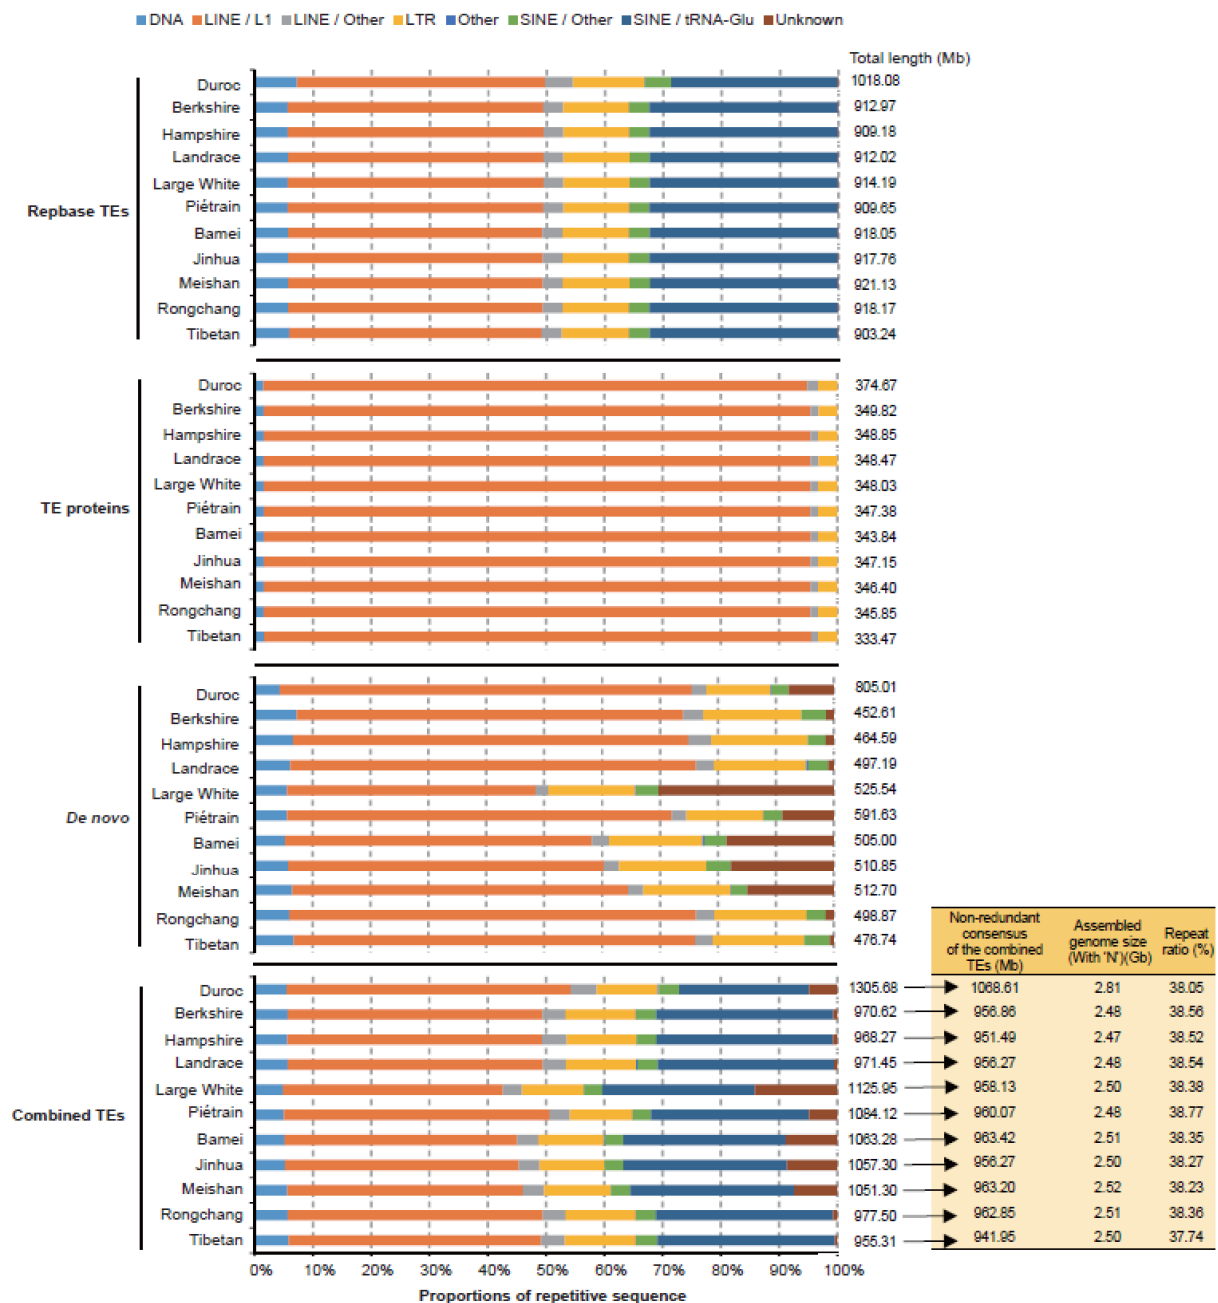

**Supplemental Fig. S5. Statistics of repeats in pig genomes.** Rebase TEs: results of RepeatMasker analysis using Rebase. TE proteins: results of RepeatProteinMask analysis using Rebase. *De novo*: results of RepeatModeler analysis using the library predicted by the *de novo* method. Combined TEs: the combined results for all repeat prediction/classification methods employed (i.e. Rebase TEs, TE proteins, and the *de novo* methods). Other: repeats classified by RepeatMasker, which are not included in other groups; Unknown: predicted repeats that cannot be classified by RepeatMasker. LINE, long interspersed nuclear elements; LTR, long terminal repeat; SINE, short interspersed nuclear elements. The repeat ratio (%) was calculated by the total length of non-redundant consensus of combined TEs against the size of the assembled genomes (With 'N', unidentified nucleotides).
