# Supplementary material for: Comprehensive variation discovery and recovery of missing sequence in the pig genome using multiple de novo assemblies
Source: PubMed Central journal article supplement — Genome Res. 2017 May;27(5):865–74. doi: 10.1101/gr.207456.116 (PMC5411780; doi:10.1101/gr.207456.116), 2017-05
Supplement: supp_gr.207456.116_Supplemental_Fig_S13.pdf [file supp_gr.207456.116_Supplemental_Fig_S13.pdf]

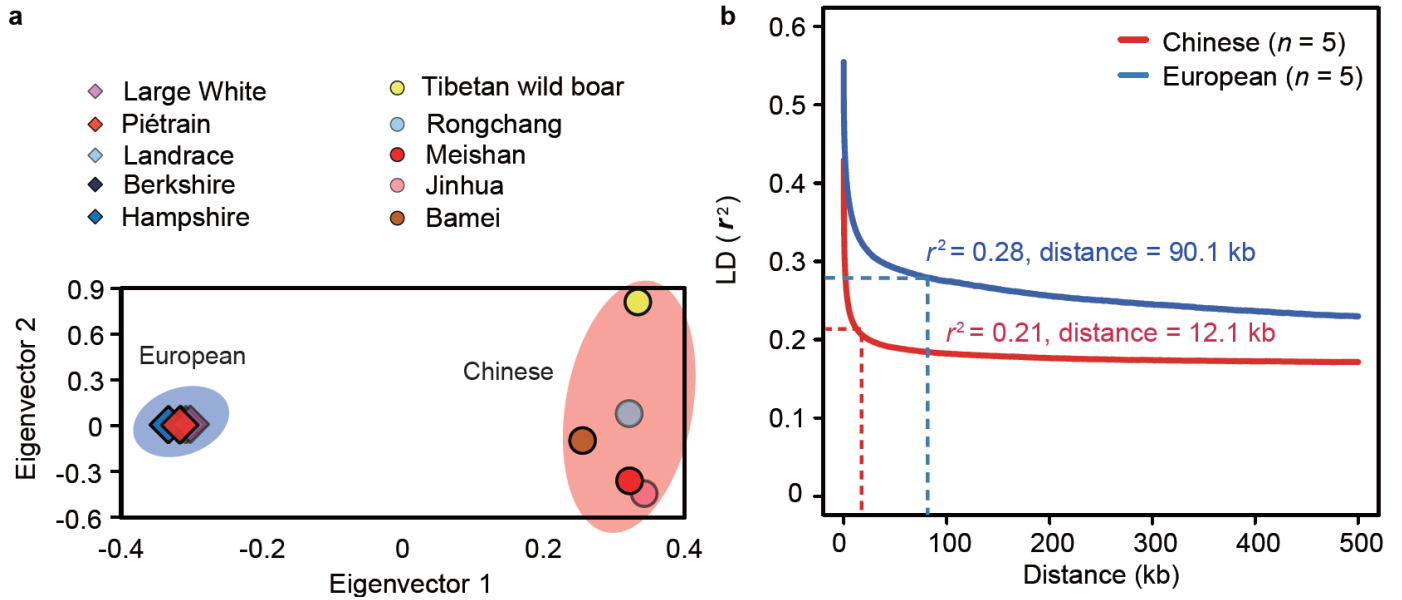

**Supplemental Fig. S13. Two-way PCA plot (a) and LD patterns (b) of Chinese and European pigs.** (a) The fraction of variance explained was 28.06% for eigenvector 1 and 12.91% for eigenvector 2. (b) LD patterns of Chinese and European pigs. European pigs have significantly higher LD than Chinese pigs across the range of distances separating loci ( $P < 10^{-16}$ , Mann-Whitney  $U$  test). The average distance over which LD decays to half of its maximum value in European pigs ( $\sim 90.1$  kb, where the  $r^2$  drops to 0.28) was substantially longer than that of Chinese pigs ( $\sim 12.1$  kb, where the  $r^2$  drops to 0.21).
