# Supplementary material for: Comprehensive variation discovery and recovery of missing sequence in the pig genome using multiple de novo assemblies
Source: PubMed Central journal article supplement — Genome Res. 2017 May;27(5):865–74. doi: 10.1101/gr.207456.116 (PMC5411780; doi:10.1101/gr.207456.116), 2017-05
Supplement: supp_gr.207456.116_Supplemental_Fig_S14.pdf [file supp_gr.207456.116_Supplemental_Fig_S14.pdf]

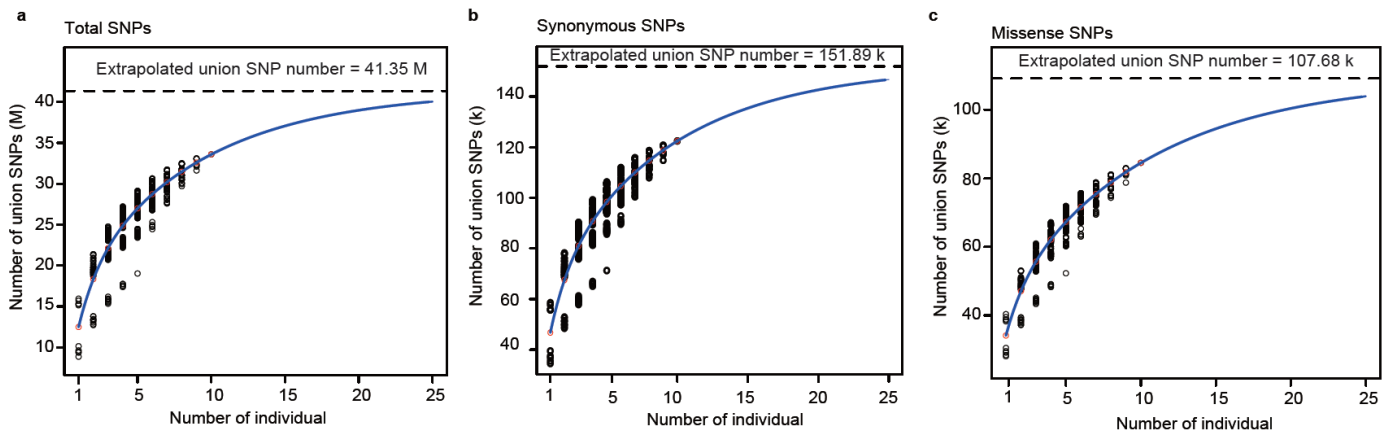

**Supplemental Fig. S14. Increase in number of the union total (a), synonymous (b) and missense (c) SNPs with every additional breed.** The number of the union SNPs was plotted as y axis values, and the number of  $n$  breeds was sequentially added was shown on the x axis. For each  $n$ , black circles represent the numbers of union SNPs for each of the  $10! / [(10 - n)! \times n!]$  breed combinations, whereas the red circles were the averages of such values. The continuous blue curve was the least-square fit of the red circles, the function of which was  $F_p(n) = Y_0 + (Plateau - Y_0) \times PercentFast \times 0.01 \times (1 - \exp(-KFast \times n)) + (Plateau - Y_0) \times (100 - PercentFast) \times 0.01 \times (1 - \exp(-KSlow \times n))$ , where Plateau evaluates the number of pan SNPs when  $n \rightarrow +\infty$ . The extrapolated union number of SNP plateau was plotted as a black dashed line. The function was fitted with goodness-of-fit R square 1.000 (See **Supplemental Methods** for details). **(a)** Total SNPs. The estimated free parameters are Plateau =  $4.14 \times 10^7 \pm 3.57 \times 10^5$ ,  $Y_0 = 2.61 \times 10^6 \pm 1.17 \times 10^5$ , PercentFast =  $34.25 \pm 0.46$ , KFast =  $0.75 \pm 0.02$ , KSlow =  $0.12 \pm 0.004$ . **(b)** Synonymous SNPs. The estimated free parameters are Plateau =  $1.52 \times 10^5 \pm 1.40 \times 10^3$ ,  $Y_0 = 1.15 \times 10^4 \pm 457$ , PercentFast =  $33.25 \pm 0.42$ , KFast =  $0.77 \pm 0.02$ , KSlow =  $0.12 \pm 0.005$ . **(c)** missense SNPs. The estimated free parameters are Plateau =  $1.09 \times 10^5 \pm 1.29 \times 10^3$ ,  $Y_0 = 1.25 \times 10^4 \pm 349$ , PercentFast =  $28.29 \pm 0.32$ , KFast =  $0.78 \pm 0.03$ , KSlow =  $0.10 \pm 0.004$ . The union SNPs of the sequenced ten pig breeds account for 81.25%, 80.61% and 77.44% of the union SNPs for total, synonymous and missense SNPs, respectively.
