# Supplementary material for: Comprehensive variation discovery and recovery of missing sequence in the pig genome using multiple de novo assemblies
Source: PubMed Central journal article supplement — Genome Res. 2017 May;27(5):865–74. doi: 10.1101/gr.207456.116 (PMC5411780; doi:10.1101/gr.207456.116), 2017-05
Supplement: supp_gr.207456.116_Supplemental_Fig_S17.pdf [file supp_gr.207456.116_Supplemental_Fig_S17.pdf]

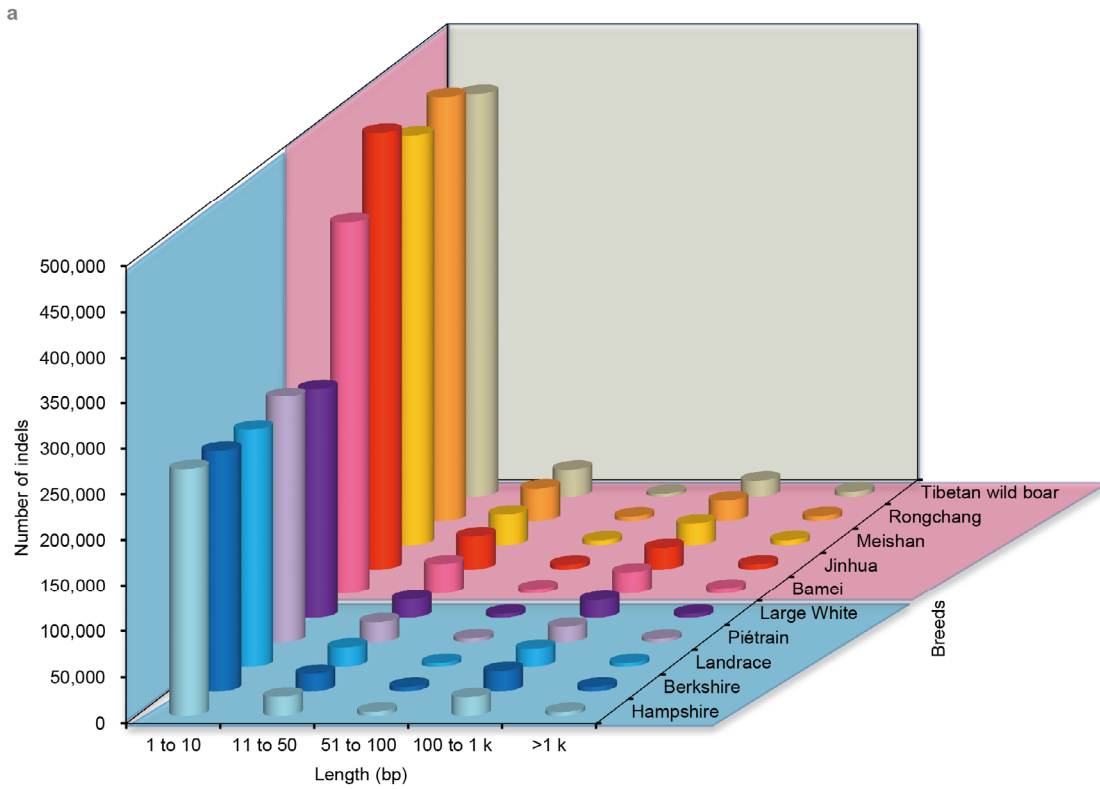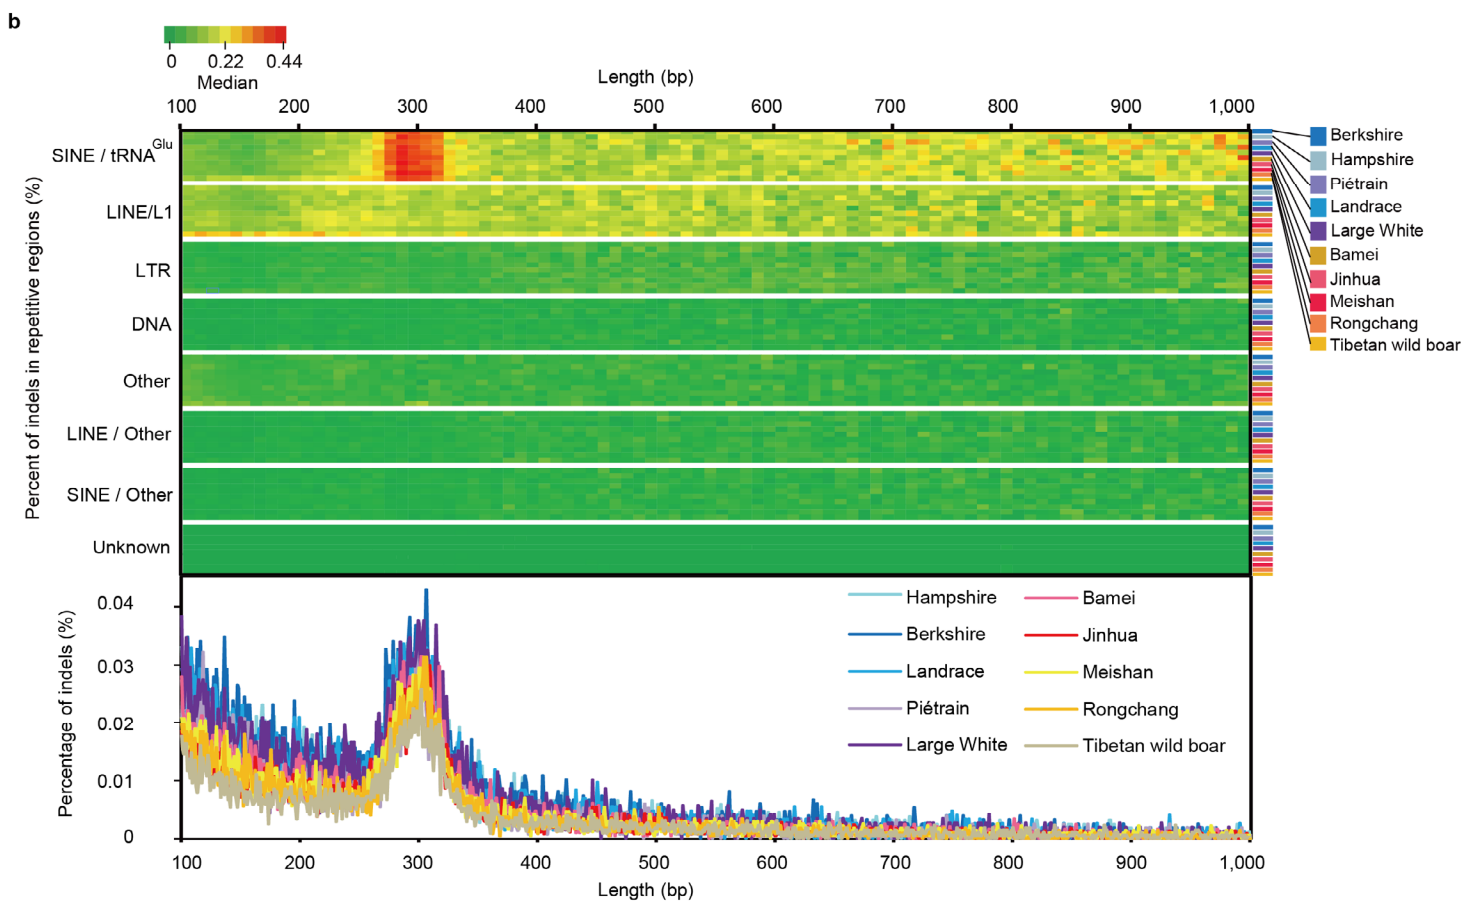

**Supplemental Fig. S17. Length distribution of indels. (a)** Overall distribution of the lengths of indels. **(b)** Distribution of indel between 100 bp and 1 kb in length. Peak at ~300 bp (bottom panels) is due to the enrichment of indels of tRNA<sup>Glu</sup>-derived short interspersed element (SINE/tRNA<sup>Glu</sup>) (top panels).
