# Supplementary material for: Comprehensive variation discovery and recovery of missing sequence in the pig genome using multiple de novo assemblies
Source: PubMed Central journal article supplement — Genome Res. 2017 May;27(5):865–74. doi: 10.1101/gr.207456.116 (PMC5411780; doi:10.1101/gr.207456.116), 2017-05
Supplement: supp_gr.207456.116_Supplemental_Fig_S18.pdf [file supp_gr.207456.116_Supplemental_Fig_S18.pdf]

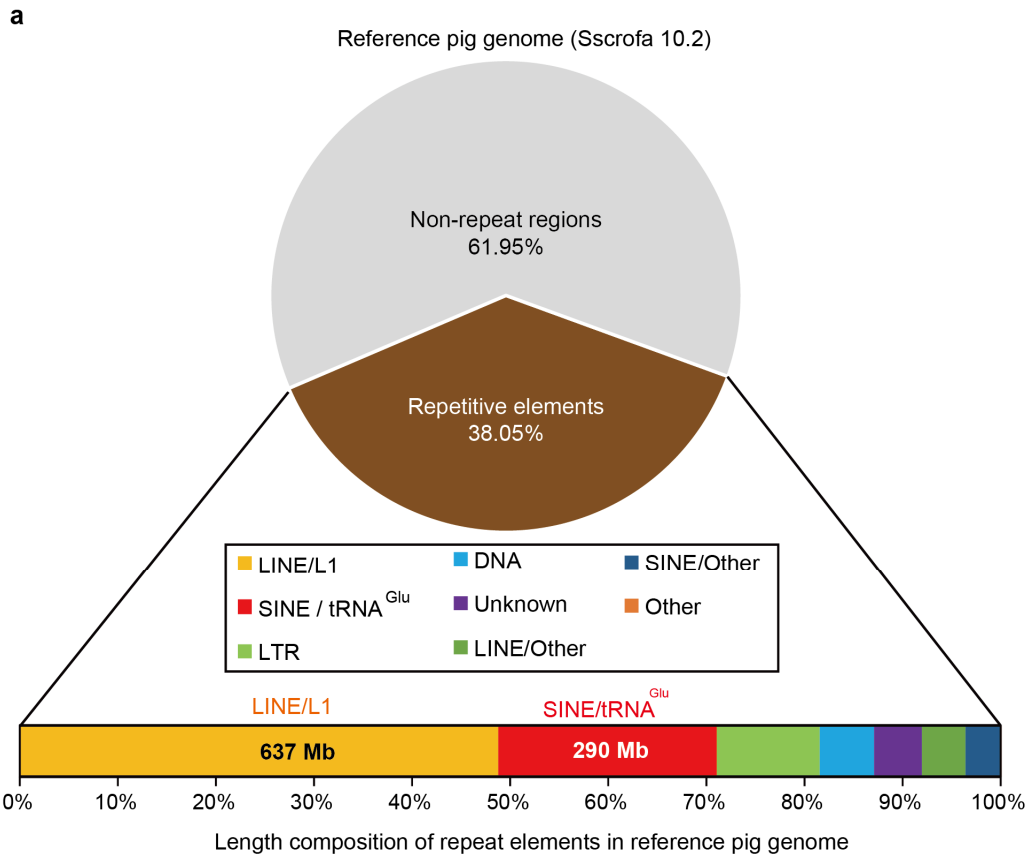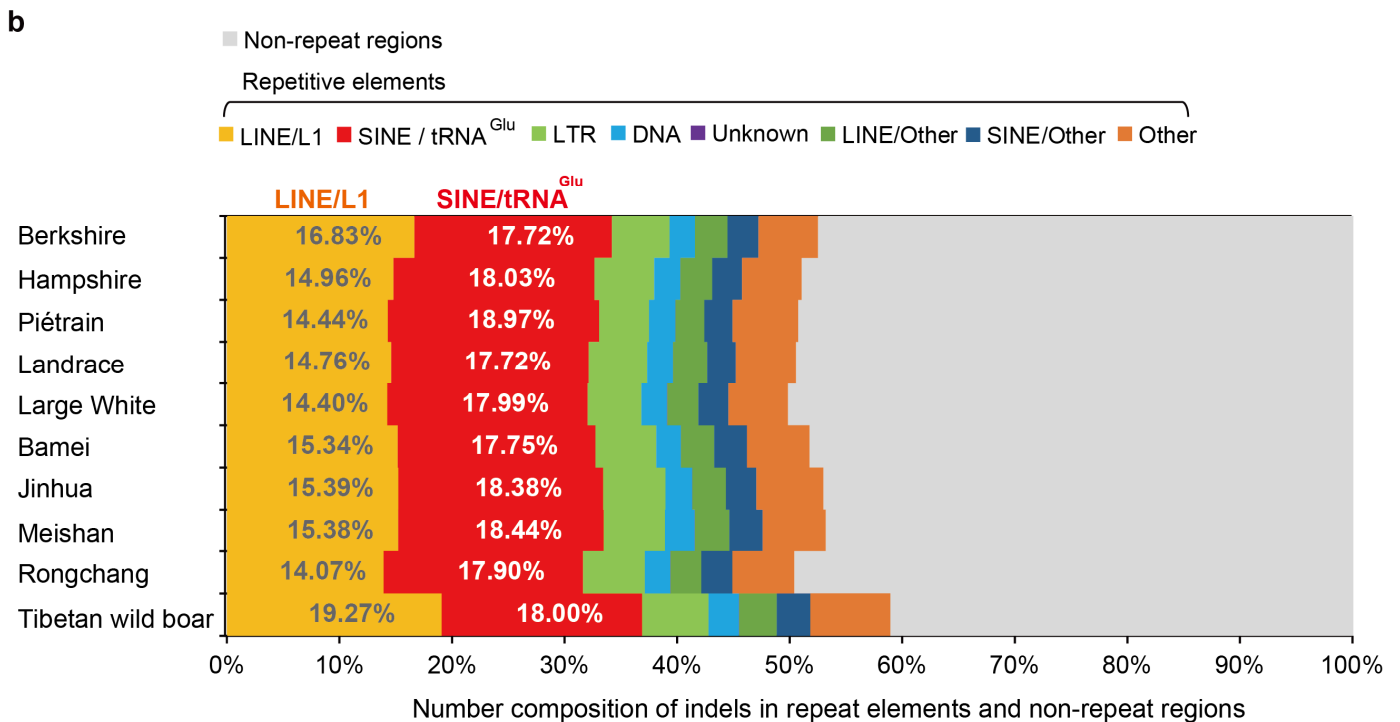

**Supplemental Fig. S18. Indels overlapping with repeat elements in reference pig genome. (a)** Length composition of repeat elements in reference genomes. **(b)** Number composition of indels in repeat elements and non-repeat regions.
