# Supplementary material for: Comprehensive variation discovery and recovery of missing sequence in the pig genome using multiple de novo assemblies
Source: PubMed Central journal article supplement — Genome Res. 2017 May;27(5):865–74. doi: 10.1101/gr.207456.116 (PMC5411780; doi:10.1101/gr.207456.116), 2017-05
Supplement: supp_gr.207456.116_Supplemental_Fig_S31.pdf [file supp_gr.207456.116_Supplemental_Fig_S31.pdf]

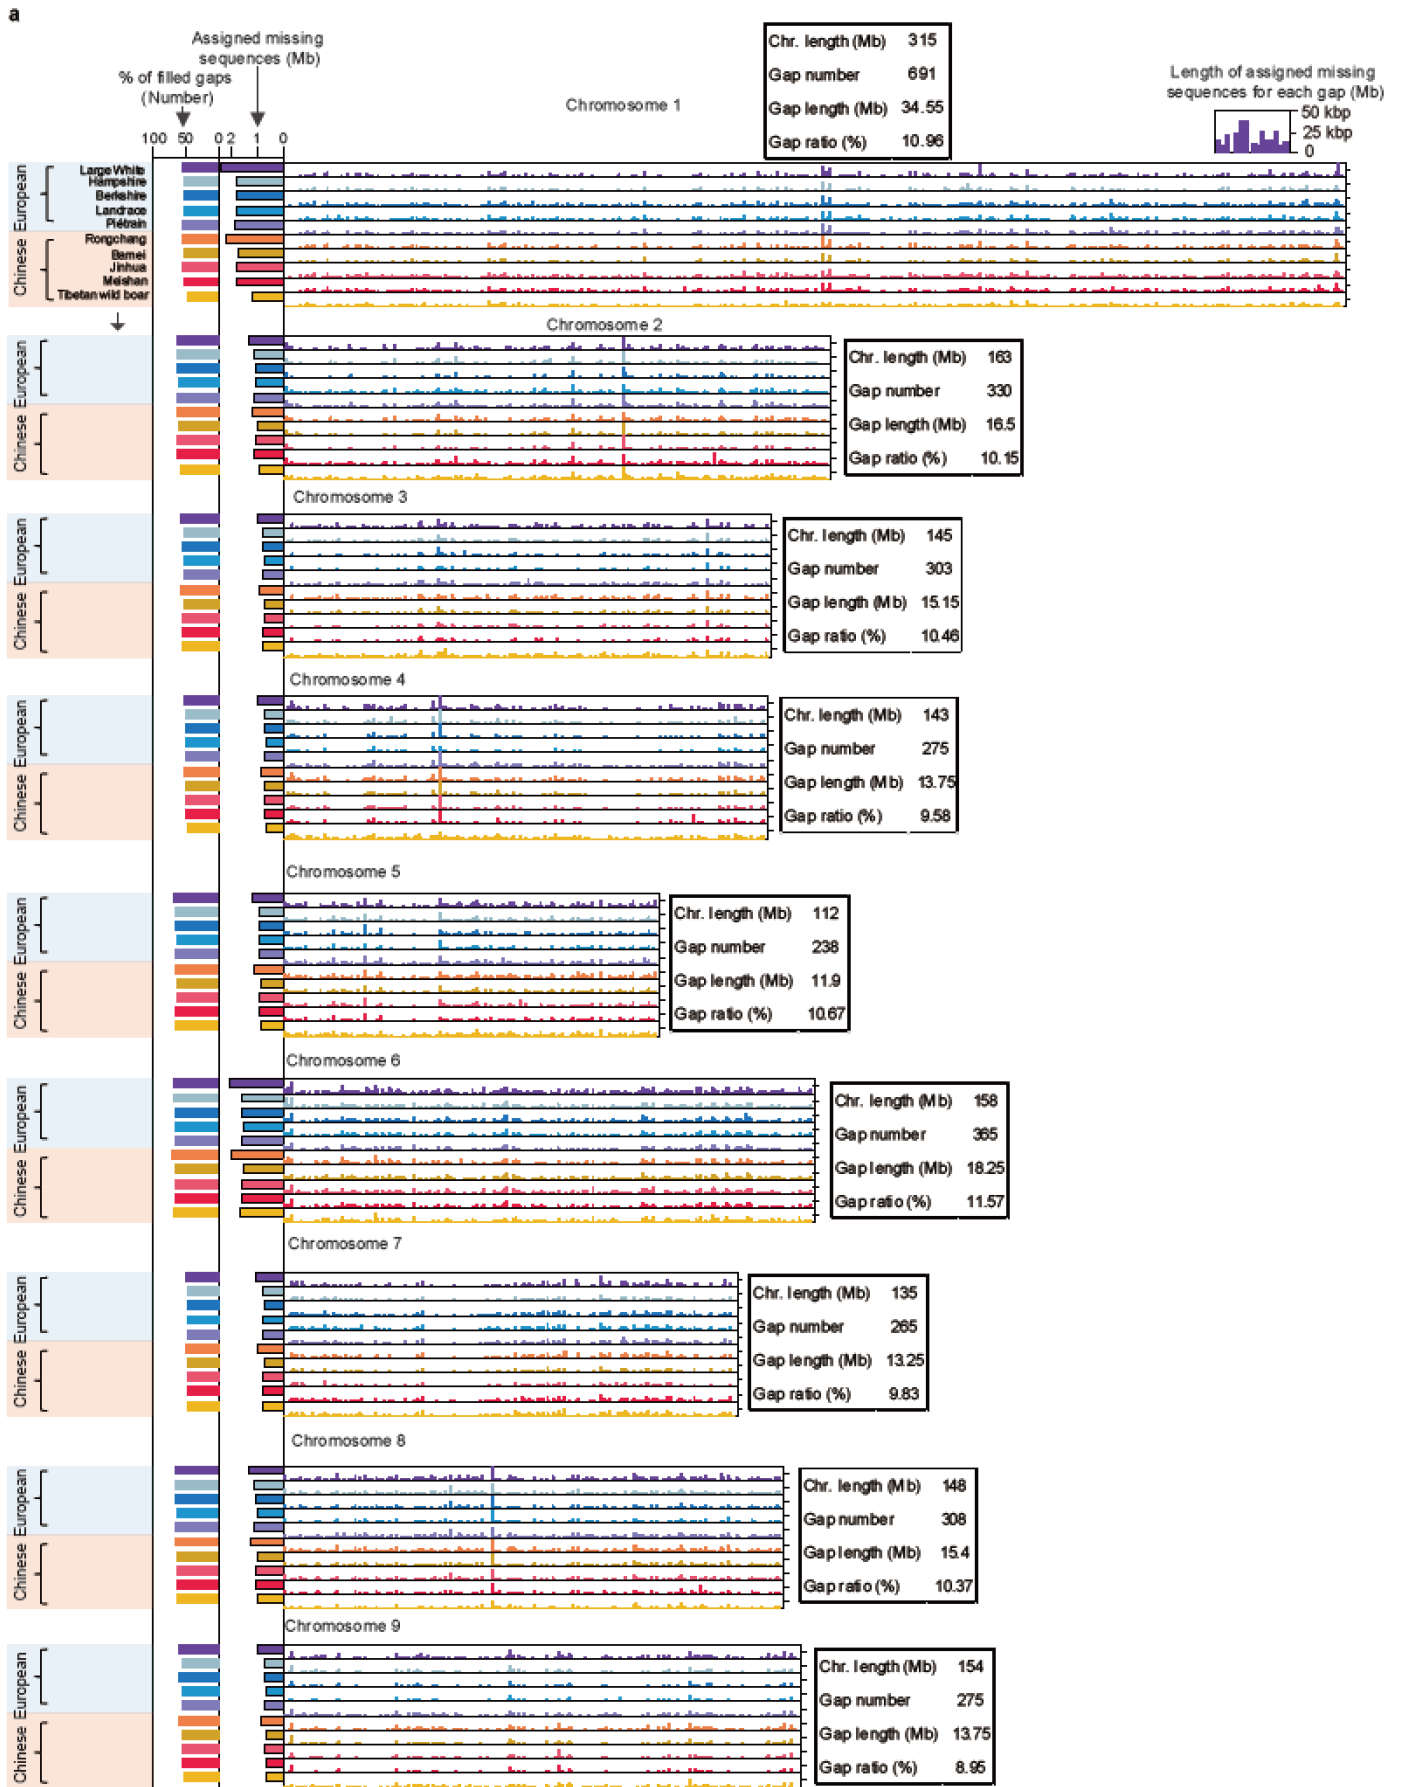

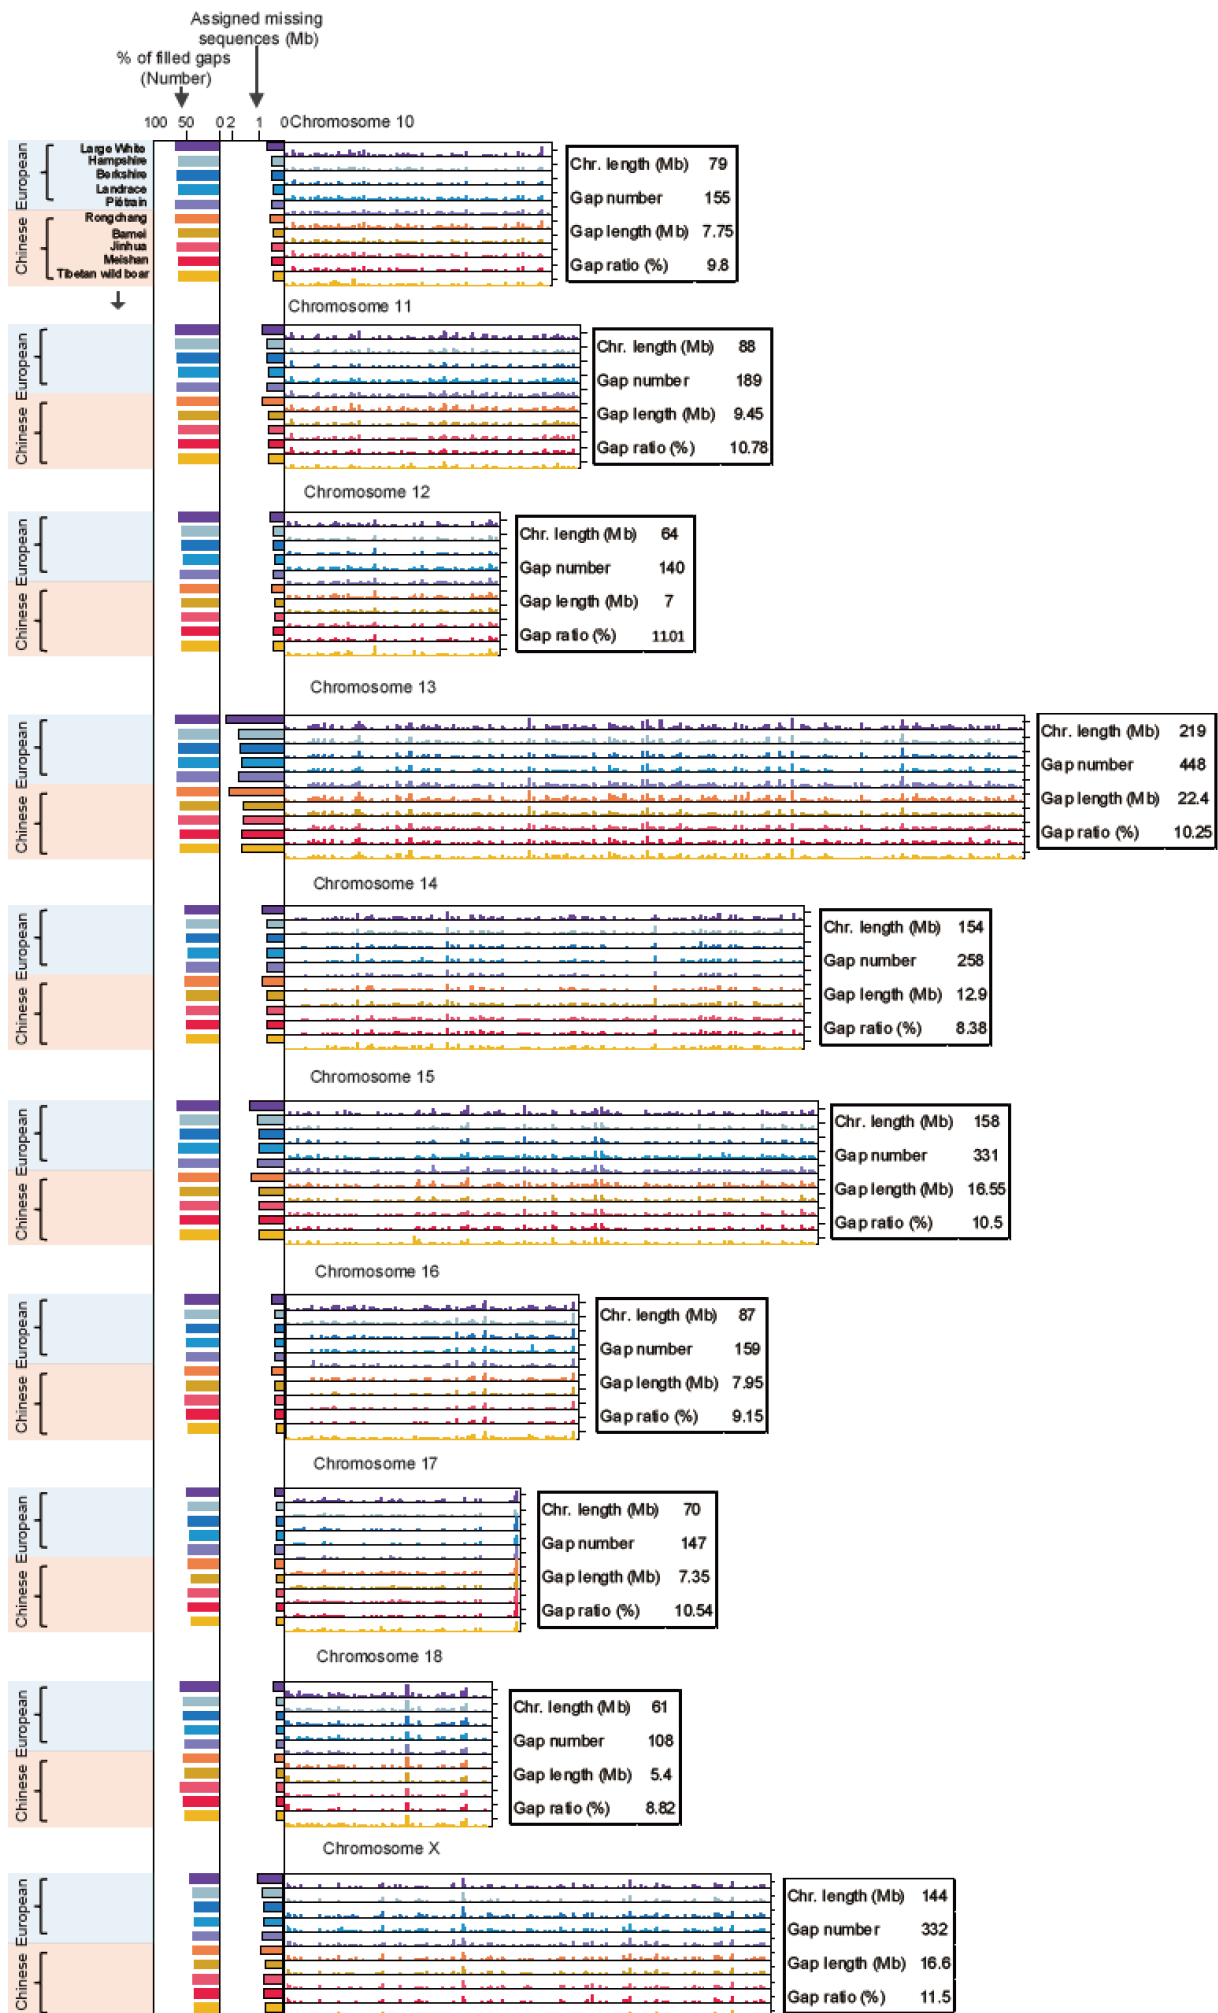

**b**

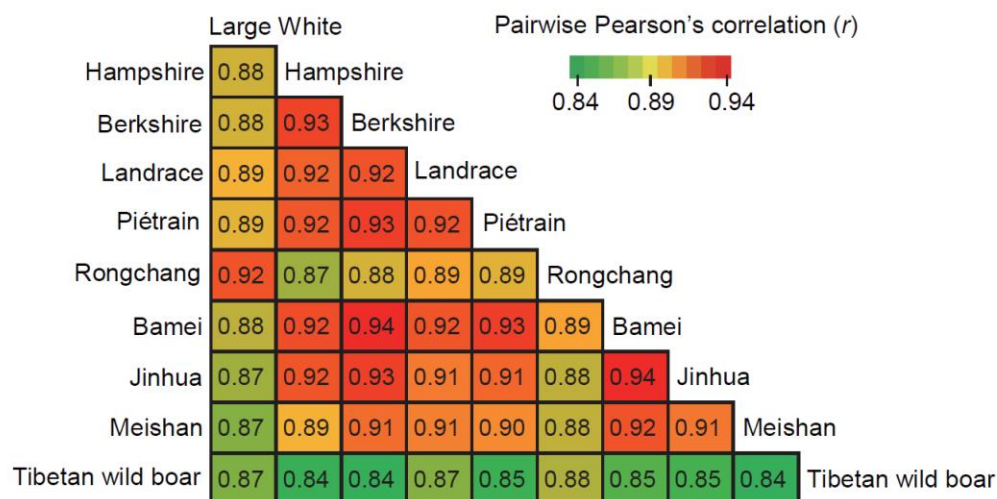

**Supplemental Fig. S31. Summary of missing sequences filled in reference assembly gaps. (a)** Length distribution of filled missing sequences across 5,317 existing gaps ( $\geq 50$  kb in length) in reference assembly. **(b)** Heat map of pairwise person's correlation ( $r$ ) of length of filled missing sequences between ten breed assemblies. The correlation rate between every two assemblies was calculated by 5,317 existing gaps ( $\geq 50$  kb in length) in reference genome.
