# Supplementary material for: Comprehensive variation discovery and recovery of missing sequence in the pig genome using multiple de novo assemblies
Source: PubMed Central journal article supplement — Genome Res. 2017 May;27(5):865–74. doi: 10.1101/gr.207456.116 (PMC5411780; doi:10.1101/gr.207456.116), 2017-05
Supplement: supp_gr.207456.116_Supplemental_Fig_S33.pdf [file supp_gr.207456.116_Supplemental_Fig_S33.pdf]

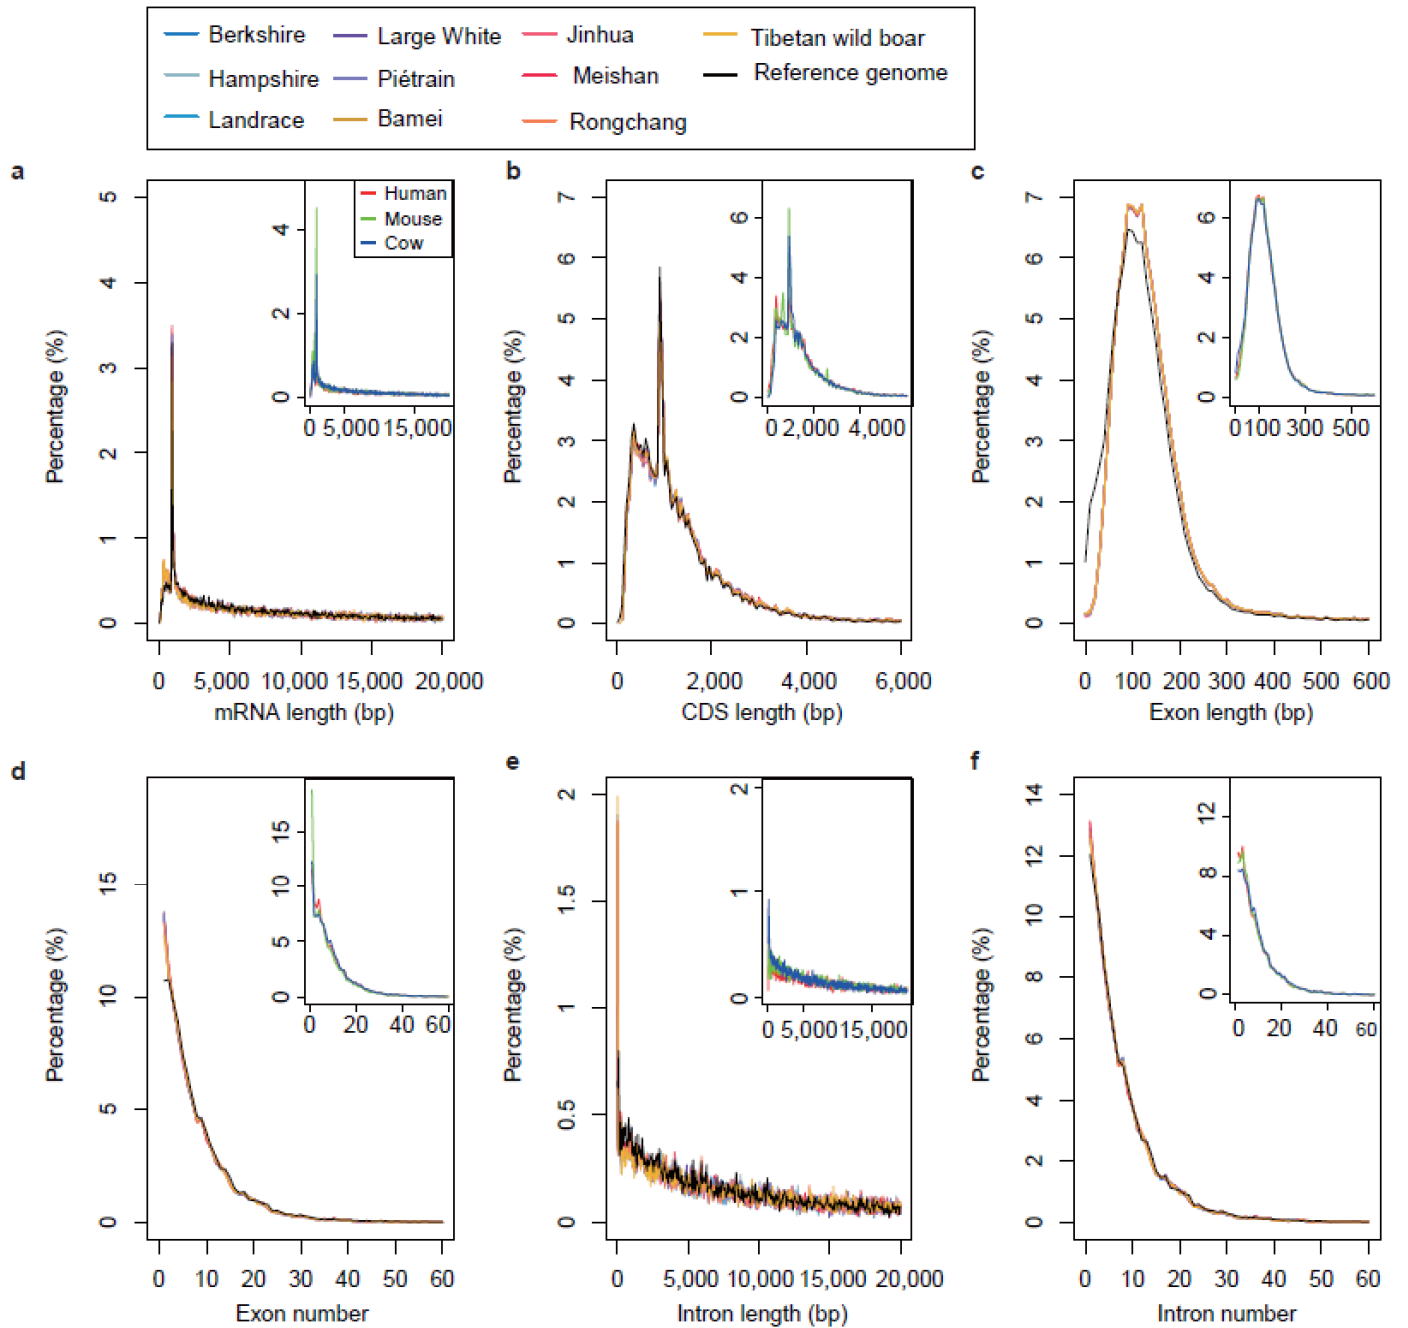

**Supplemental Fig. S33. Comparison of gene parameters in pig genomes and human, cow and mouse genomes. (a) mRNA length; (b) CDS length; (c) exon length; (d) exon number; (e) intron length; and (f) intron number. The similar gene parameters between the ten pig assemblies and reference pig genome, as well as other mammals indicate the high quality gene structure annotation in ten pig assemblies.**
