# Supplementary material for: Comprehensive variation discovery and recovery of missing sequence in the pig genome using multiple de novo assemblies
Source: PubMed Central journal article supplement — Genome Res. 2017 May;27(5):865–74. doi: 10.1101/gr.207456.116 (PMC5411780; doi:10.1101/gr.207456.116), 2017-05
Supplement: supp_gr.207456.116_Supplemental_Fig_S34.pdf [file supp_gr.207456.116_Supplemental_Fig_S34.pdf]

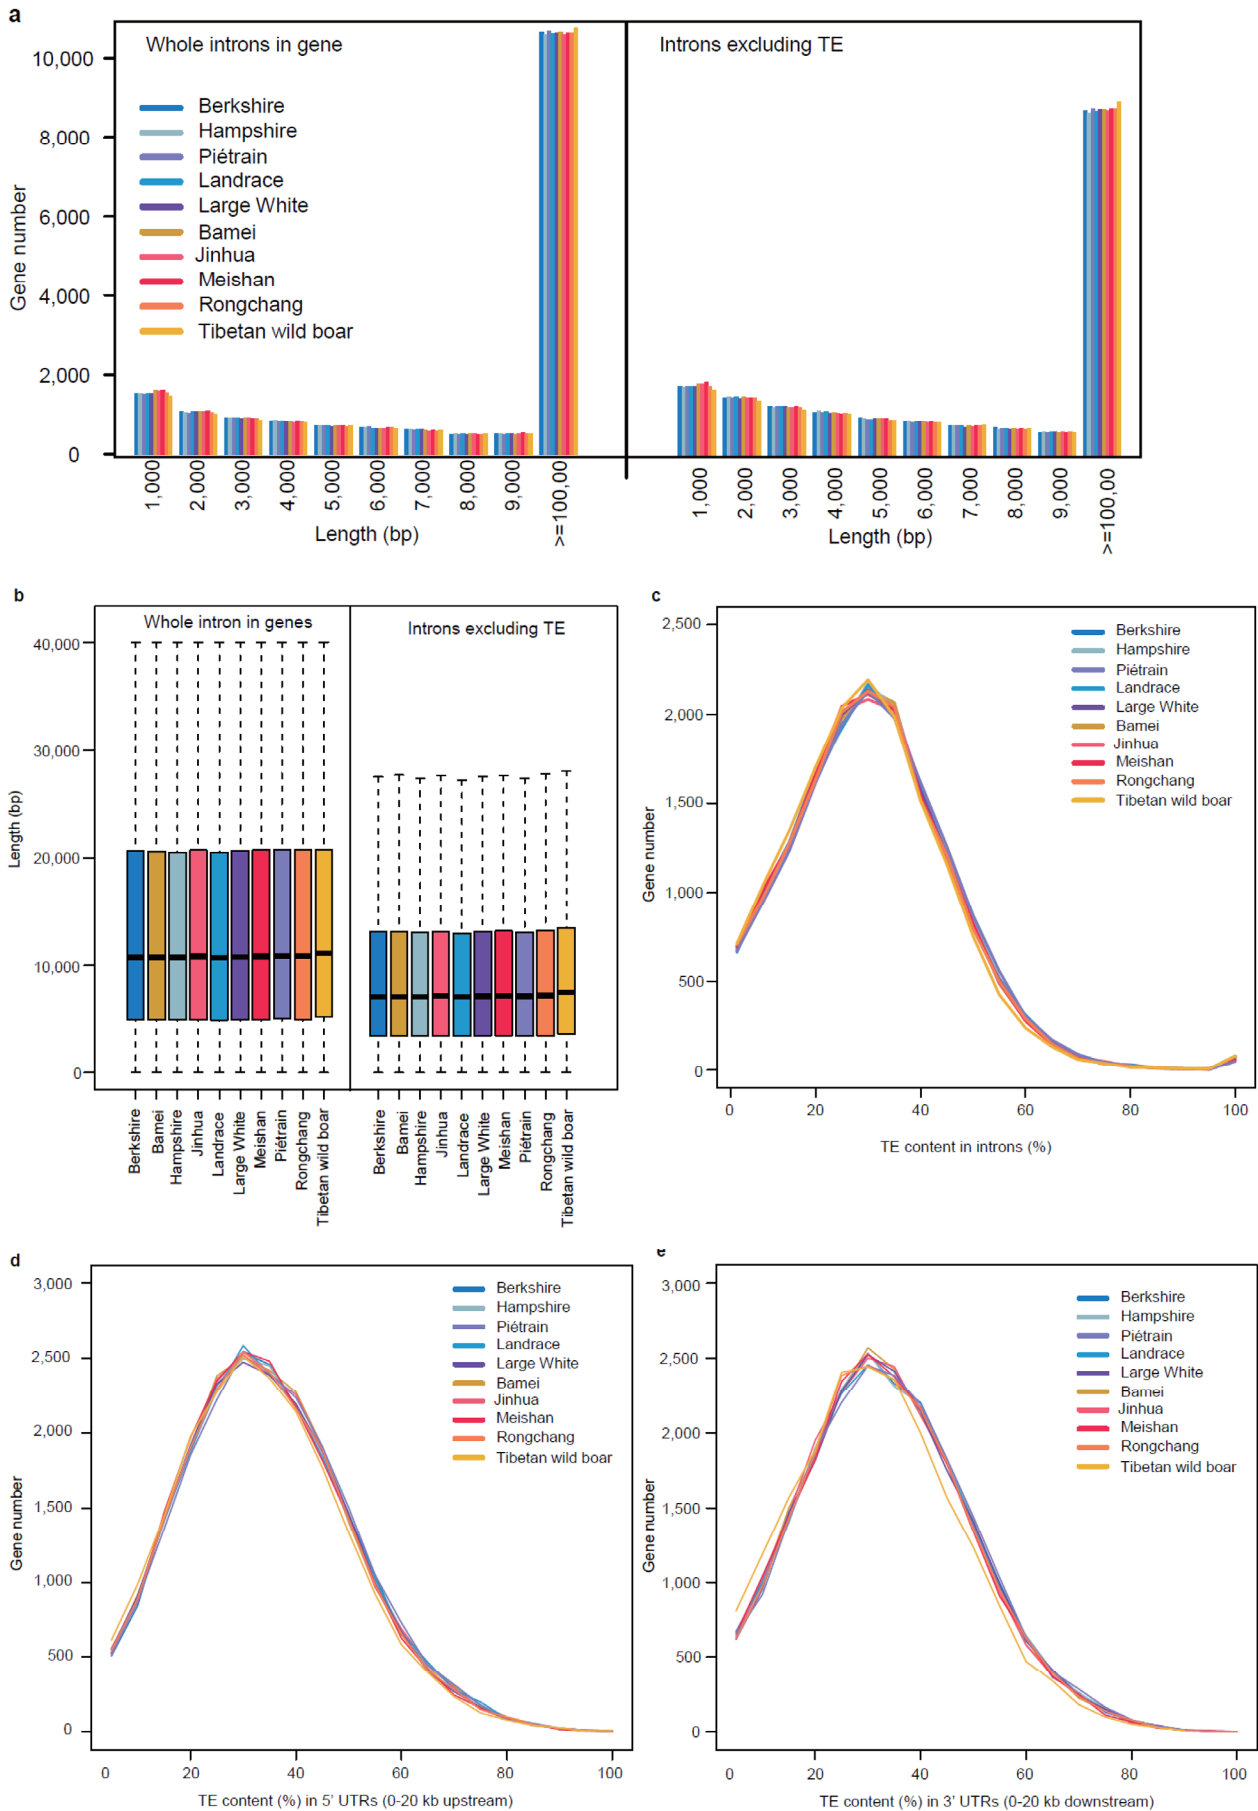

**Supplemental Fig. S34. Similar transposable element (TE) content in introns, 5' UTRs and 3' UTRs of protein coding genes in ten pig breeds. (a)** The distribution of total intron length and length of introns after excluding TE; **(b)** Boxplot showing total intron length and length of introns after excluding TE; Distribution of TE proportion in **(c)** introns, **(d)** 5' UTRs and **(e)** 3' UTRs.
