# Supplementary material for: Comprehensive variation discovery and recovery of missing sequence in the pig genome using multiple de novo assemblies
Source: PubMed Central journal article supplement — Genome Res. 2017 May;27(5):865–74. doi: 10.1101/gr.207456.116 (PMC5411780; doi:10.1101/gr.207456.116), 2017-05
Supplement: supp_gr.207456.116_Supplemental_Fig_S49.pdf [file supp_gr.207456.116_Supplemental_Fig_S49.pdf]

a

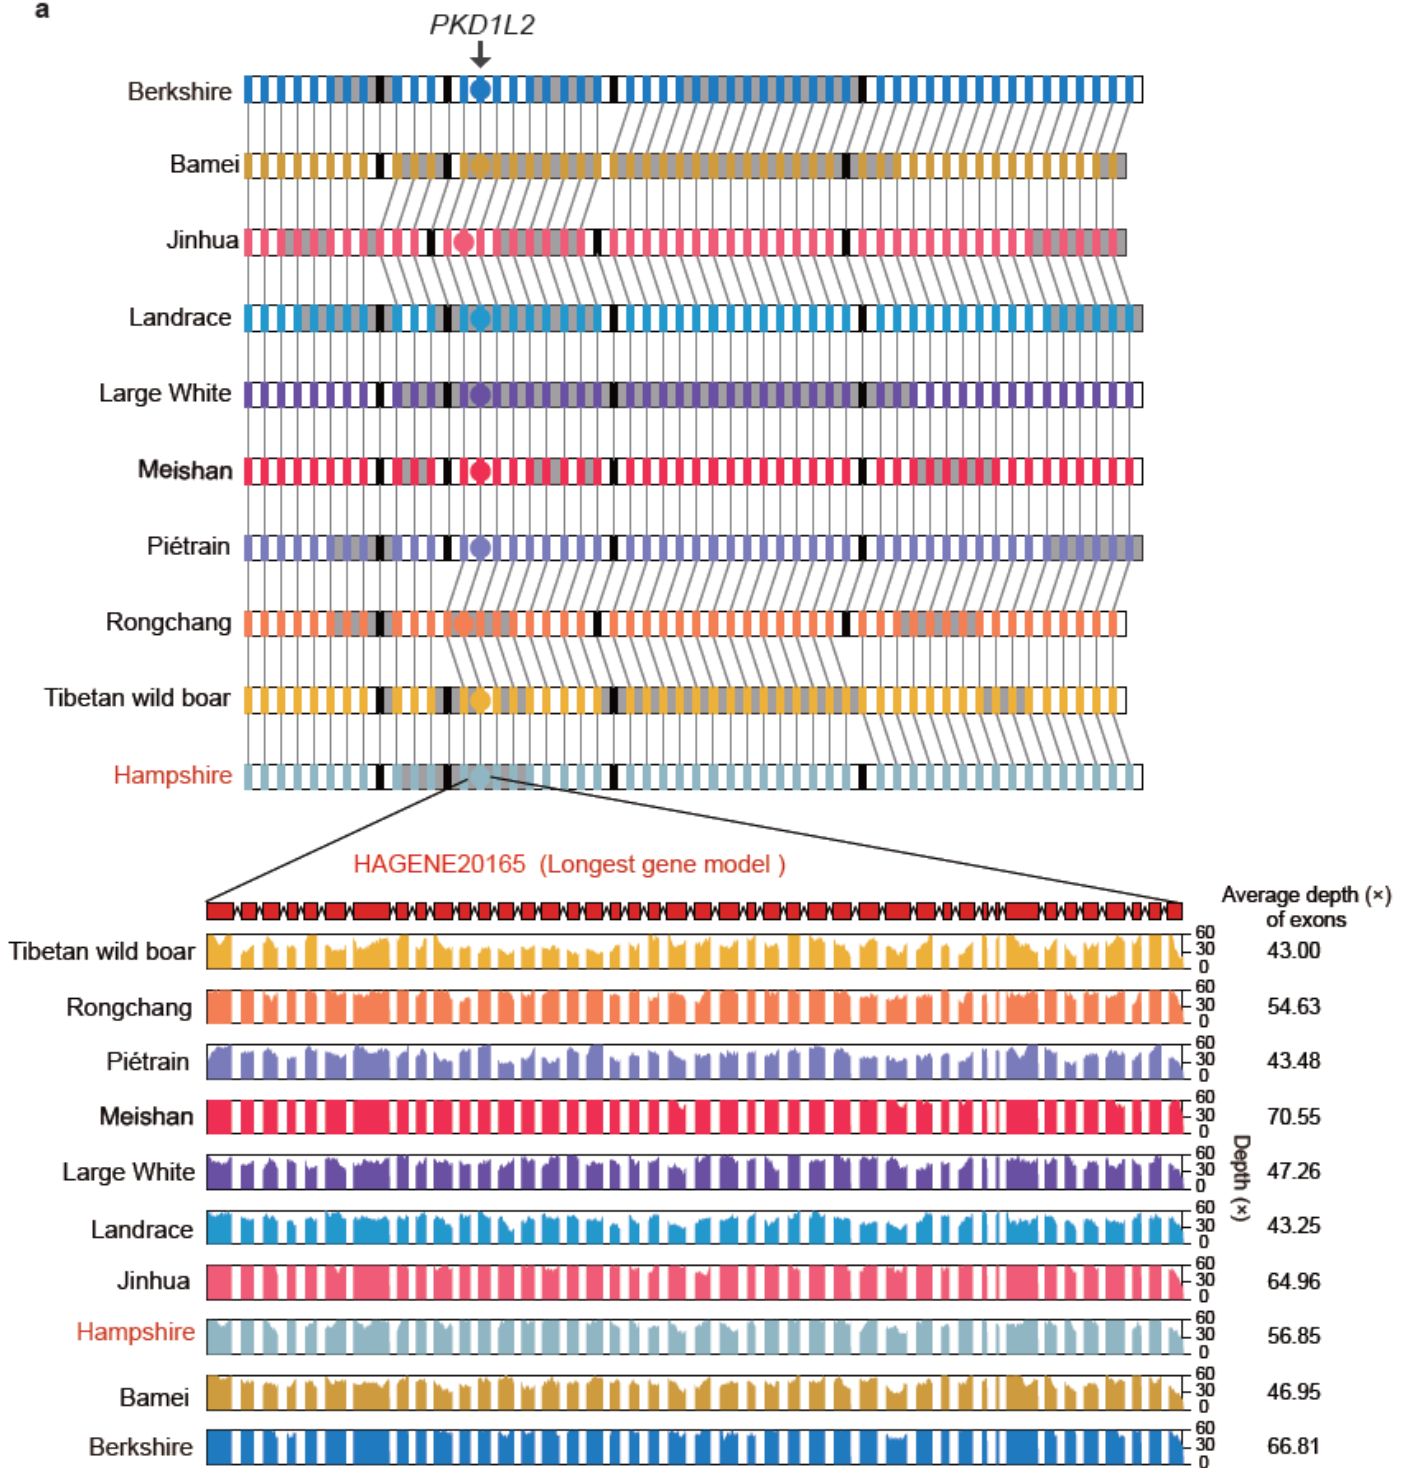

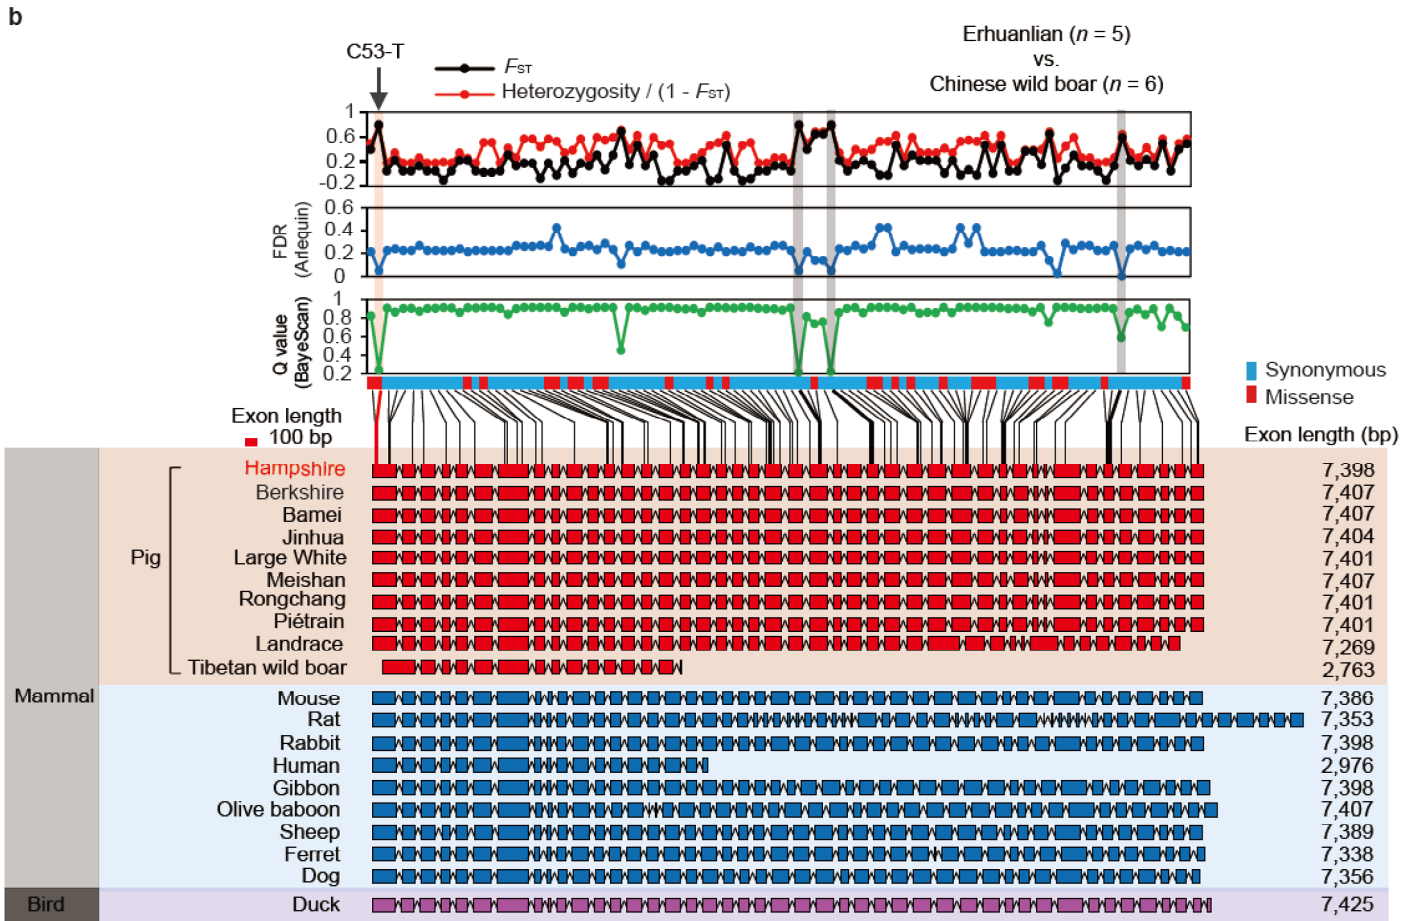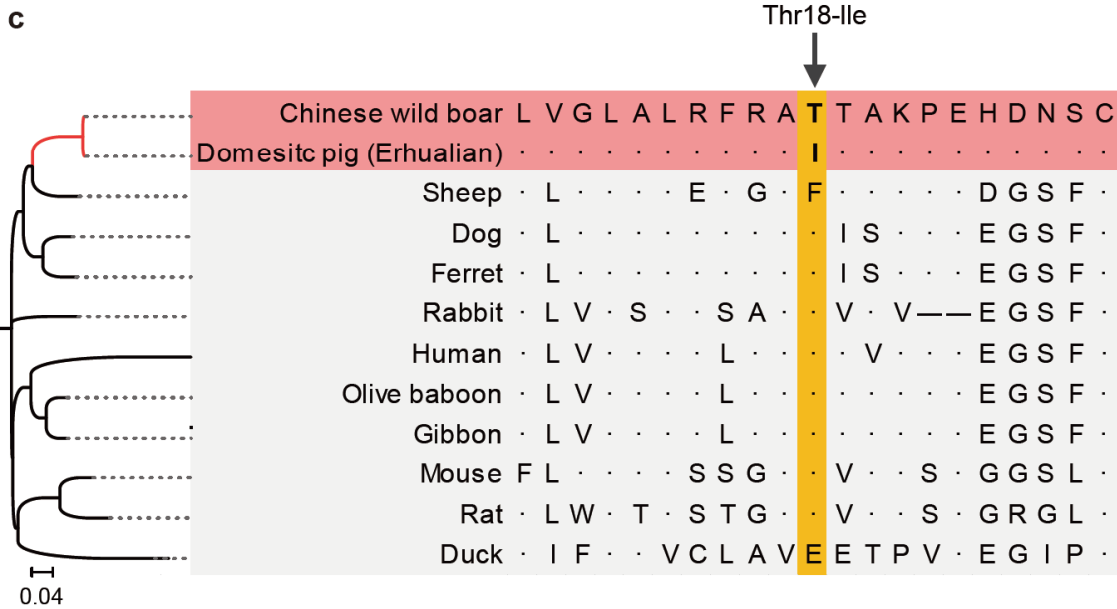

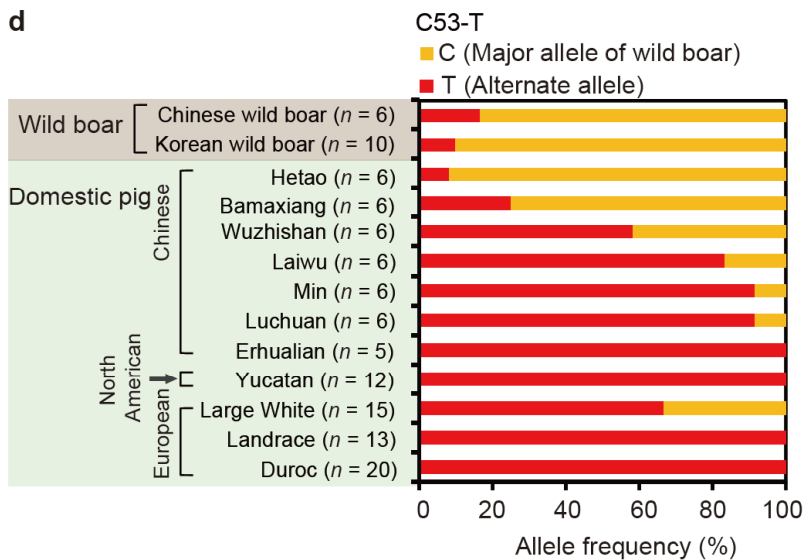

**Supplemental Fig. S49. Details of assembled *PKD1L2* and selected variants. (a)** Assembled *PKD1L2*. Top panels: the inter-assembly collinear genes (colorized rectangles) are linked by gray lines, while genes not presented in all of ten assemblies are marked in black. *PKD1L2* is denoted as a circle. Different scaffolds are distinguished by alternant white and gray backgrounds. Second panels: the higher coverage and depth for the longest gene model of the *PKD1L2* by crossly mapping with reads from paired-end DNA libraries (insert sizes of 180 and 500 bp) of ten assemblies. This result suggests the slightly distinct structures of collinear missing genes among ten assemblies (See **b**), which are attributable to the limitations of short reads assembly. Therefore, the longest gene model was considered more reliable and used for subsequent analyses. **(b)** A selected missense mutation (C53-T) in *PKD1L2* between Chinese wild boars ( $n = 6$ ) and domestic Erhualian pigs ( $n = 5$ ). Top panels:  $F_{ST}$  and Heterozygosity  $/(1 - F_{ST})$ , FDR (Arlequin)<sup>39</sup> and  $q$  values (BayeScan)<sup>40</sup> are plotted for 102 coding mutations (28 missenses and 74 synonymous mutations). Second panels: structures of *PKD1L2* among ten assemblies and in various species. Boxes and lines indicate exons and introns, respectively. **(c)** An amino acid variant (Thr18-Ile) in *PKD1L2*. Left panels: The phylogenetic tree of the orthologous protein sequences of pig and 10 vertebrates (Ensemble release 83) were derived from multiple alignment as implemented in the Clustal Omega tool<sup>35</sup>, which were in accordance with the evolutionary distance with pig lineage. Right panels: Multispecies alignment of proteins for a selected missense mutation. The protein coordinate is based on longest gene model of inter-assembly collinear genes among ten assemblies (HAGENE20165). Dots indicate identities to the Chinese wild boar sequence and dashes indicate missing data. **(d)** Selected missense mutation (C53-T) is highly frequent in domestic pigs.
