# Supplementary material for: Comprehensive variation discovery and recovery of missing sequence in the pig genome using multiple de novo assemblies
Source: PubMed Central journal article supplement — Genome Res. 2017 May;27(5):865–74. doi: 10.1101/gr.207456.116 (PMC5411780; doi:10.1101/gr.207456.116), 2017-05
Supplement: supp_gr.207456.116_Supplemental_Table_S1.pdf [file supp_gr.207456.116_Supplemental_Table_S1.pdf]

**Supplemental Table S1. Summary of sequencing data.**

| Breed        | Insert size length | Raw data (Gb) | High quality data |                       |                       |                                    |
|--------------|--------------------|---------------|-------------------|-----------------------|-----------------------|------------------------------------|
|              |                    |               | Base (Gb)         | Proportion of Q20 (%) | Proportion of Q30 (%) | Sequence coverage (x) <sup>a</sup> |
| Berkshire    | 180 bp             | 113.08        | 106.75            | 97.51                 | 92.80                 | 47.12                              |
|              | 500 bp             | 59.47         | 54.52             | 96.64                 | 90.81                 | 24.06                              |
|              | 2 kb               | 57.19         | 51.44             | 96.98                 | 91.74                 | 22.71                              |
|              | 5 kb               | 20.50         | 18.70             | 97.10                 | 92.04                 | 8.25                               |
|              | 6 kb               | 28.32         | 25.67             | 96.56                 | 90.33                 | 11.33                              |
|              | <b>Total</b>       | <b>278.55</b> | <b>257.09</b>     | <b>97.09</b>          | <b>91.86</b>          | <b>113.47</b>                      |
| Hampshire    | 180 bp             | 101.11        | 97.56             | 96.83                 | 91.27                 | 41.86                              |
|              | 500 bp             | 49.61         | 46.26             | 92.93                 | 83.65                 | 19.85                              |
|              | 2 kb               | 45.12         | 41.44             | 95.82                 | 89.29                 | 17.78                              |
|              | 5 kb               | 27.65         | 25.62             | 96.37                 | 89.84                 | 10.99                              |
|              | 6 kb               | 26.70         | 24.23             | 95.58                 | 87.87                 | 10.40                              |
|              | <b>Total</b>       | <b>250.18</b> | <b>235.12</b>     | <b>95.70</b>          | <b>88.91</b>          | <b>100.88</b>                      |
| Landrace     | 180 bp             | 87.18         | 82.18             | 96.25                 | 89.16                 | 35.22                              |
|              | 500 bp             | 56.69         | 51.68             | 94.16                 | 84.65                 | 22.15                              |
|              | 2 kb               | 49.55         | 44.97             | 95.50                 | 88.54                 | 19.27                              |
|              | 5 kb               | 19.20         | 17.36             | 95.46                 | 88.96                 | 7.44                               |
|              | 6 kb               | 18.49         | 16.68             | 95.39                 | 89.27                 | 7.15                               |
|              | <b>Total</b>       | <b>231.11</b> | <b>212.88</b>     | <b>95.45</b>          | <b>87.92</b>          | <b>91.23</b>                       |
| Large White  | 180 bp             | 86.65         | 82.39             | 96.15                 | 88.85                 | 35.12                              |
|              | 500 bp             | 56.28         | 51.60             | 94.60                 | 85.66                 | 22.00                              |
|              | 2 kb               | 46.77         | 42.69             | 95.61                 | 88.77                 | 18.20                              |
|              | 5 kb               | 17.96         | 16.80             | 96.55                 | 90.58                 | 7.16                               |
|              | 6 kb               | 25.29         | 23.60             | 96.36                 | 90.10                 | 10.06                              |
|              | 10 kb              | 7.53          | 6.88              | 97.20                 | 92.44                 | 2.93                               |
| <b>Total</b> | <b>240.48</b>      | <b>223.95</b> | <b>95.77</b>      | <b>88.47</b>          | <b>95.48</b>          |                                    |
| Piétrain     | 180 bp             | 87.97         | 83.45             | 94.91                 | 86.89                 | 36.00                              |
|              | 500 bp             | 53.28         | 46.85             | 93.23                 | 83.21                 | 20.21                              |
|              | 2 kb               | 41.73         | 36.52             | 97.17                 | 92.43                 | 15.75                              |
|              | 5 kb               | 30.17         | 27.68             | 95.79                 | 88.38                 | 11.94                              |
|              | 6 kb               | 30.73         | 28.58             | 96.55                 | 90.23                 | 12.33                              |
|              | <b>Total</b>       | <b>243.88</b> | <b>223.08</b>     | <b>95.24</b>          | <b>87.64</b>          | <b>96.22</b>                       |
| Bamei        | 180 bp             | 88.53         | 84.44             | 95.28                 | 87.76                 | 36.85                              |
|              | 500 bp             | 52.43         | 46.42             | 93.39                 | 83.47                 | 20.26                              |
|              | 2 kb               | 34.80         | 30.94             | 96.25                 | 90.46                 | 13.50                              |
|              | 5 kb               | 18.98         | 17.59             | 95.59                 | 88.68                 | 7.68                               |
|              | 6 kb               | 25.23         | 23.91             | 96.78                 | 91.28                 | 10.44                              |
|              | <b>Total</b>       | <b>219.97</b> | <b>203.29</b>     | <b>95.20</b>          | <b>87.68</b>          | <b>88.72</b>                       |
| Jinhua       | 180 bp             | 107.31        | 103.57            | 97.01                 | 91.44                 | 45.28                              |
|              | 500 bp             | 56.29         | 52.96             | 94.62                 | 86.41                 | 23.15                              |

|                                |              |               |               |               |               |               |
|--------------------------------|--------------|---------------|---------------|---------------|---------------|---------------|
|                                | 2 kb         | 44.18         | 40.32         | 95.65         | 88.65         | 17.63         |
|                                | 5 kb         | 26.28         | 24.20         | 95.76         | 88.34         | 10.58         |
|                                | 6 kb         | 30.81         | 28.41         | 95.78         | 88.33         | 12.42         |
|                                | <b>Total</b> | <b>264.87</b> | <b>249.45</b> | <b>96.02</b>  | <b>89.26</b>  | <b>109.05</b> |
| Meishan                        | 180 bp       | 117.31        | 111.39        | 96.99         | 91.31         | 50.02         |
|                                | 500 bp       | 54.58         | 51.69         | 95.22         | 87.66         | 23.21         |
|                                | 2 kb         | 41.51         | 37.99         | 95.50         | 88.34         | 17.06         |
|                                | 5 kb         | 22.09         | 20.33         | 96.51         | 89.87         | 9.13          |
|                                | 6 kb         | 28.52         | 26.07         | 96.41         | 89.73         | 11.71         |
|                                | <b>Total</b> | <b>264.02</b> | <b>247.47</b> | <b>96.29</b>  | <b>89.80</b>  | <b>111.13</b> |
| Rongchang                      | 180 bp       | 97.93         | 94.32         | 97.18         | 92.12         | 41.36         |
|                                | 500 bp       | 50.72         | 46.48         | 92.37         | 82.38         | 20.38         |
|                                | 2 kb         | 45.32         | 41.67         | 95.91         | 89.57         | 18.27         |
|                                | 5 kb         | 12.08         | 10.97         | 96.95         | 91.37         | 4.81          |
|                                | 6 kb         | 13.51         | 12.13         | 97.02         | 91.63         | 5.32          |
|                                | <b>Total</b> | <b>227.71</b> | <b>213.32</b> | <b>95.86</b>  | <b>89.43</b>  | <b>93.54</b>  |
| Tibetan wild boar <sup>b</sup> | 180 bp       | 136.57        | 130.05        | 96.80         | 91.42         | 54.66         |
|                                | 500 bp       | 88.64         | 86.19         | 96.20         | 91.01         | 36.22         |
|                                | 2 kb         | 27.13         | 20.84         | 94.44         | 88.06         | 8.76          |
|                                | 5 kb         | 33.72         | 13.08         | 95.58         | 90.62         | 5.50          |
|                                | 10 kb        | 33.23         | 28.07         | 96.71         | 91.16         | 11.80         |
|                                | <b>Total</b> | <b>319.29</b> | <b>278.23</b> | <b>95.946</b> | <b>90.454</b> | <b>116.94</b> |

Short-insert (180 and 500 bp) and long-insert (2, 5 and 6 kb) DNA libraries were constructed, and read lengths were 100 bp. For Large White and Rongchang pigs, long-insert DNA libraries in 10 kb length were constructed. In total an average of  $246.75 \pm 19.43$  Gb of sequence data were obtained for *de novo* assembly for each of nine individuals. After filtering reads based on quality, an average of  $229.52 \pm 18.74$  Gb of high-quality data for each individual were retained for subsequent analysis. <sup>a</sup>The estimated genome size (revised) is listed in **Supplemental Table S2**. The estimated genome size of Tibetan wild boar is 2,379.31 Mb. <sup>b</sup>The unassembled sequencing reads of Tibetan wild boar were downloaded from the NCBI sequence read archive (SRA) under accession code SRA065461.
