# Supplementary material for: Comprehensive variation discovery and recovery of missing sequence in the pig genome using multiple de novo assemblies
Source: PubMed Central journal article supplement — Genome Res. 2017 May;27(5):865–74. doi: 10.1101/gr.207456.116 (PMC5411780; doi:10.1101/gr.207456.116), 2017-05
Supplement: supp_gr.207456.116_Supplemental_Table_S3.pdf [file supp_gr.207456.116_Supplemental_Table_S3.pdf]

**Supplemental Table S3. Summary of the pig genome assemblies.**

| Type                                                | Breeds             | Total length (bp) | Max length (bp) | Average length (bp) | N50 length (bp) | N70 length (bp) | N90 length (bp) | N50 Number | N70 Number | N90 Number |
|-----------------------------------------------------|--------------------|-------------------|-----------------|---------------------|-----------------|-----------------|-----------------|------------|------------|------------|
| Contigs (Calculated using the fragments > 100 bp)   | <b>Rongchang</b>   | 2.48E+09          | 3.61E+05        | 4,086               | 35,338          | 20,921          | 7,210           | 20,272     | 38,503     | 76,329     |
|                                                     | <b>Bamei</b>       | 2.49E+09          | 3.37E+05        | 4,038               | 34,832          | 20,481          | 6,862           | 20,629     | 39,246     | 78,325     |
|                                                     | <b>Jinhua</b>      | 2.48E+09          | 3.22E+05        | 4,557               | 38,561          | 23,022          | 8,167           | 18,629     | 35,208     | 69,150     |
|                                                     | <b>Meishan</b>     | 2.49E+09          | 2.88E+05        | 3,882               | 28,070          | 16,615          | 5,479           | 25,703     | 48,719     | 97,208     |
|                                                     | <b>Large White</b> | 2.47E+09          | 3.52E+05        | 4,965               | 37,670          | 22,699          | 8,274           | 19,152     | 36,038     | 70,002     |
|                                                     | <b>Berkshire</b>   | 2.46E+09          | 3.62E+05        | 5,381               | 38,450          | 23,165          | 8,734           | 18,862     | 35,313     | 68,107     |
|                                                     | <b>Hampshire</b>   | 2.45E+09          | 4.04E+05        | 6,194               | 41,906          | 25,677          | 10,024          | 17,422     | 32,317     | 61,397     |
|                                                     | <b>Landrace</b>    | 2.46E+09          | 4.94E+05        | 5,383               | 38,678          | 23,238          | 8,704           | 18,683     | 35,065     | 67,894     |
|                                                     | <b>Piétrain</b>    | 2.45E+09          | 3.61E+05        | 5,730               | 39,886          | 24,000          | 9,230           | 18,154     | 33,990     | 65,300     |
| Contigs (Calculated using the fragments > 500 bp)   | <b>Rongchang</b>   | 2.41E+09          | 3.61E+05        | 14,672              | 36,516          | 22,273          | 9,274           | 19,259     | 36,144     | 68,362     |
|                                                     | <b>Bamei</b>       | 2.41E+09          | 3.37E+05        | 13,890              | 36,014          | 21,807          | 8,951           | 19,599     | 36,829     | 69,979     |
|                                                     | <b>Jinhua</b>      | 2.41E+09          | 3.22E+05        | 15,389              | 39,702          | 24,341          | 10,136          | 17,814     | 33,320     | 62,865     |
|                                                     | <b>Meishan</b>     | 2.42E+09          | 2.88E+05        | 11,447              | 28,989          | 17,655          | 7,122           | 24,463     | 45,829     | 87,090     |
|                                                     | <b>Large White</b> | 2.41E+09          | 3.52E+05        | 15,452              | 38,659          | 23,813          | 9,973           | 18,412     | 34,337     | 64,413     |
|                                                     | <b>Berkshire</b>   | 2.41E+09          | 3.62E+05        | 16,230              | 39,286          | 24,206          | 10,270          | 18,202     | 33,798     | 63,242     |
|                                                     | <b>Hampshire</b>   | 2.41E+09          | 4.04E+05        | 18,247              | 42,660          | 26,636          | 11,468          | 16,899     | 31,135     | 57,694     |
|                                                     | <b>Landrace</b>    | 2.41E+09          | 4.94E+05        | 16,078              | 39,568          | 24,262          | 10,227          | 18,032     | 33,562     | 63,044     |
|                                                     | <b>Piétrain</b>    | 2.41E+09          | 3.61E+05        | 16,840              | 40,747          | 24,999          | 10,671          | 17,565     | 32,633     | 61,006     |
| Scaffolds (Calculated using the fragments > 100 bp) | <b>Rongchang</b>   | 2.51E+09          | 1.54E+07        | 5,152               | 2,291,036       | 1,322,474       | 354,452         | 327        | 617        | 1,289      |
|                                                     | <b>Bamei</b>       | 2.51E+09          | 1.34E+07        | 5,087               | 1,480,659       | 842,824         | 210,120         | 481        | 929        | 1,999      |
|                                                     | <b>Jinhua</b>      | 2.50E+09          | 1.01E+07        | 5,745               | 1,437,885       | 831,201         | 214,869         | 484        | 936        | 2,001      |
|                                                     | <b>Meishan</b>     | 2.52E+09          | 8.22E+06        | 5,133               | 1,221,680       | 701,790         | 172,852         | 598        | 1,138      | 2,450      |
|                                                     | <b>Large White</b> | 2.50E+09          | 1.14E+07        | 6,520               | 2,382,354       | 1,378,587       | 410,311         | 316        | 592        | 1,206      |
|                                                     | <b>Berkshire</b>   | 2.48E+09          | 8.41E+06        | 7,147               | 1,627,881       | 932,612         | 288,111         | 434        | 833        | 1,717      |
|                                                     | <b>Hampshire</b>   | 2.47E+09          | 9.17E+06        | 8,344               | 1,529,334       | 897,528         | 281,683         | 450        | 869        | 1,795      |
|                                                     | <b>Landrace</b>    | 2.48E+09          | 1.36E+07        | 7,158               | 1,396,470       | 831,438         | 262,033         | 512        | 973        | 1,960      |
|                                                     | <b>Piétrain</b>    | 2.48E+09          | 9.96E+06        | 7,704               | 1,649,526       | 955,199         | 289,502         | 436        | 829        | 1,725      |

|                                                     |                    |          |          |        |           |           |         |     |       |       |
|-----------------------------------------------------|--------------------|----------|----------|--------|-----------|-----------|---------|-----|-------|-------|
| Scaffolds (Calculated using the fragments > 500 bp) | <b>Rongchang</b>   | 2.44E+09 | 1.54E+07 | 54,283 | 2,357,971 | 1,403,674 | 483,528 | 312 | 580   | 1,132 |
|                                                     | <b>Bamei</b>       | 2.44E+09 | 1.34E+07 | 46,265 | 1,539,927 | 907,052   | 310,646 | 457 | 871   | 1,746 |
|                                                     | <b>Jinhua</b>      | 2.43E+09 | 1.01E+07 | 50,122 | 1,493,194 | 885,524   | 301,670 | 462 | 884   | 1,776 |
|                                                     | <b>Meishan</b>     | 2.45E+09 | 8.22E+06 | 39,538 | 1,261,123 | 748,200   | 248,939 | 570 | 1,070 | 2,144 |
|                                                     | <b>Large White</b> | 2.44E+09 | 1.14E+07 | 57,741 | 2,446,755 | 1,447,777 | 519,572 | 305 | 564   | 1,094 |
|                                                     | <b>Berkshire</b>   | 2.43E+09 | 8.41E+06 | 62,639 | 1,679,101 | 975,996   | 352,650 | 418 | 795   | 1,572 |
|                                                     | <b>Hampshire</b>   | 2.43E+09 | 9.17E+06 | 74,277 | 1,557,999 | 937,074   | 332,814 | 436 | 836   | 1,665 |
|                                                     | <b>Landrace</b>    | 2.43E+09 | 1.36E+07 | 60,767 | 1,419,053 | 876,306   | 322,289 | 494 | 931   | 1,802 |
|                                                     | <b>Piétrain</b>    | 2.43E+09 | 9.96E+06 | 66,382 | 1,671,083 | 1,006,842 | 355,662 | 422 | 795   | 1,591 |
