# Supplementary material for: Comprehensive variation discovery and recovery of missing sequence in the pig genome using multiple de novo assemblies
Source: PubMed Central journal article supplement — Genome Res. 2017 May;27(5):865–74. doi: 10.1101/gr.207456.116 (PMC5411780; doi:10.1101/gr.207456.116), 2017-05
Supplement: supp_gr.207456.116_Supplemental_Table_S5.pdf [file supp_gr.207456.116_Supplemental_Table_S5.pdf]

**Supplemental Table S5. Assessment of sequence coverage of pig genome assemblies using the CDS regions of the reference genome.**

| Breeds      | Gene coverage by genome assemblies (%) |        |        |                                              |                                              | Gene coverage by reads (%) |        |                                              |                                              |
|-------------|----------------------------------------|--------|--------|----------------------------------------------|----------------------------------------------|----------------------------|--------|----------------------------------------------|----------------------------------------------|
|             | Length of unigenes                     | Number | Length | With > 90% sequence in one scaffold (Number) | With > 50% sequence in one scaffold (Number) | Number                     | Length | With > 90% sequence in one scaffold (Number) | With > 50% sequence in one scaffold (Number) |
| Berkshire   | > 0 bp                                 | 99.94  | 99.10  | 95.60                                        | 99.09                                        | 99.52                      | 99.96  | 98.31                                        | 99.87                                        |
|             | > 1 kb                                 | 99.97  | 99.29  | 95.52                                        | 99.33                                        | 99.56                      | 99.96  | 98.85                                        | 99.93                                        |
|             | > 5 kb                                 | 100    | 98.88  | 92.94                                        | 99.09                                        | 99.64                      | 100    | 99.54                                        | 99.77                                        |
| Bamei       | > 0 bp                                 | 99.94  | 99.12  | 95.00                                        | 99.06                                        | 99.45                      | 99.92  | 98.10                                        | 99.80                                        |
|             | > 1 kb                                 | 99.97  | 99.28  | 94.90                                        | 99.13                                        | 99.50                      | 99.95  | 98.65                                        | 99.87                                        |
|             | > 5 kb                                 | 100    | 99.00  | 91.57                                        | 98.41                                        | 99.60                      | 100    | 99.54                                        | 99.77                                        |
| Hampshire   | > 0 bp                                 | 99.95  | 99.07  | 95.66                                        | 99.08                                        | 99.47                      | 99.92  | 98.09                                        | 99.84                                        |
|             | > 1 kb                                 | 99.97  | 99.24  | 95.66                                        | 99.31                                        | 99.51                      | 99.94  | 98.59                                        | 99.92                                        |
|             | > 5 kb                                 | 100    | 98.97  | 92.71                                        | 99.54                                        | 99.61                      | 100    | 99.54                                        | 99.77                                        |
| Jinhua      | > 0 bp                                 | 99.94  | 99.17  | 95.38                                        | 99.23                                        | 99.46                      | 99.94  | 98.15                                        | 99.79                                        |
|             | > 1 kb                                 | 99.97  | 99.24  | 95.09                                        | 99.16                                        | 99.54                      | 99.95  | 98.79                                        | 99.90                                        |
|             | > 5 kb                                 | 100    | 98.64  | 91.80                                        | 98.86                                        | 99.60                      | 100    | 99.54                                        | 99.77                                        |
| Landrace    | > 0 bp                                 | 99.96  | 99.17  | 95.31                                        | 99.27                                        | 99.47                      | 99.94  | 98.09                                        | 99.85                                        |
|             | > 1 kb                                 | 99.97  | 99.28  | 95.22                                        | 99.37                                        | 99.51                      | 99.94  | 98.64                                        | 99.92                                        |
|             | > 5 kb                                 | 100    | 98.78  | 91.80                                        | 98.86                                        | 99.60                      | 100    | 99.32                                        | 99.77                                        |
| Large White | > 0 bp                                 | 99.95  | 99.17  | 95.46                                        | 99.17                                        | 99.46                      | 99.94  | 98.04                                        | 99.85                                        |
|             | > 1 kb                                 | 99.97  | 99.34  | 95.44                                        | 99.43                                        | 99.49                      | 99.95  | 98.57                                        | 99.90                                        |
|             | > 5 kb                                 | 100    | 98.99  | 94.08                                        | 99.32                                        | 99.61                      | 100    | 99.54                                        | 99.77                                        |
| Meishan     | > 0 bp                                 | 99.95  | 99.07  | 94.19                                        | 99.05                                        | 99.52                      | 99.96  | 98.38                                        | 99.84                                        |
|             | > 1 kb                                 | 99.97  | 99.22  | 93.93                                        | 99.15                                        | 99.56                      | 99.96  | 98.91                                        | 99.91                                        |
|             | > 5 kb                                 | 100    | 99.09  | 94.53                                        | 98.86                                        | 99.62                      | 100    | 99.54                                        | 99.77                                        |
| Piétrain    | > 0 bp                                 | 99.95  | 99.17  | 95.41                                        | 99.14                                        | 99.43                      | 99.94  | 97.97                                        | 99.82                                        |
|             | > 1 kb                                 | 99.97  | 99.35  | 95.47                                        | 99.36                                        | 99.47                      | 99.94  | 98.48                                        | 99.90                                        |
|             | > 5 kb                                 | 100    | 98.97  | 92.48                                        | 98.86                                        | 99.58                      | 100    | 99.09                                        | 99.77                                        |
| Rongchang   | > 0 bp                                 | 99.94  | 99.13  | 95.36                                        | 99.06                                        | 99.47                      | 99.93  | 98.14                                        | 99.82                                        |

|                              |        |       |       |       |       |       |       |       |       |
|------------------------------|--------|-------|-------|-------|-------|-------|-------|-------|-------|
| <b>Tibetan<br/>wild boar</b> | > 1 kb | 99.97 | 99.29 | 95.52 | 99.23 | 99.53 | 99.95 | 98.70 | 99.90 |
|                              | > 5 kb | 100   | 99.11 | 94.31 | 98.86 | 99.60 | 100   | 99.32 | 99.77 |
|                              | > 0 bp | 99.93 | 98.51 | 90.43 | 98.48 | 99.37 | 99.95 | 97.89 | 99.87 |
|                              | > 1 kb | 99.95 | 98.90 | 89.98 | 99.02 | 99.40 | 99.96 | 98.29 | 99.91 |
|                              | > 5 kb | 100   | 99.33 | 89.75 | 99.54 | 99.55 | 100   | 99.32 | 99.77 |

The CDS sequences of the reference pig genome (Sscrofa 10.2) were mapped to the ten assemblies and high-quality short-insert reads (180 and 500 bp) by BWA software (v.0.7.12)<sup>43</sup>.
