# Supplementary material for: Comprehensive variation discovery and recovery of missing sequence in the pig genome using multiple de novo assemblies
Source: PubMed Central journal article supplement — Genome Res. 2017 May;27(5):865–74. doi: 10.1101/gr.207456.116 (PMC5411780; doi:10.1101/gr.207456.116), 2017-05
Supplement: supp_gr.207456.116_Supplemental_Table_S7.pdf [file supp_gr.207456.116_Supplemental_Table_S7.pdf]

**Supplemental Table S7. The concordance between SNPs identified by the porcine 60K BeadChip genotyping array (Illumina) and the assembly-versus-assembly method.**

| SNP type                                                | Category                               | Berkshire | Hampshire | Landrace | Large White | Piétrain | Bamei  | Jinhua | Meishan | Rongchang | Tibetan wild boar |
|---------------------------------------------------------|----------------------------------------|-----------|-----------|----------|-------------|----------|--------|--------|---------|-----------|-------------------|
| <b>Homozygous</b>                                       | SNPs identified by the chip            | 11,594    | 12,592    | 12,224   | 11,913      | 13,102   | 16,479 | 18,890 | 17,908  | 17,723    | 17,983            |
|                                                         | Validated by the assembly-based method | 11,347    | 12,432    | 12,076   | 11,805      | 12,917   | 16,311 | 18,735 | 17,687  | 17,526    | 17,739            |
|                                                         | Concordance ratio (%)                  | 97.87     | 98.73     | 98.79    | 99.09       | 98.59    | 98.98  | 99.18  | 98.77   | 98.89     | 98.64             |
| <b>Heterozygous</b>                                     | SNPs identified by the chip            | 13,712    | 11,390    | 14,555   | 16,337      | 13,211   | 11,317 | 7,989  | 9,234   | 9,804     | 9,464             |
|                                                         | Validated by the assembly-based method | 13,384    | 11,161    | 14,254   | 16,040      | 12,952   | 10,976 | 7,753  | 8,929   | 9,532     | 9,175             |
|                                                         | Concordance ratio (%)                  | 97.61     | 97.99     | 97.93    | 98.18       | 98.04    | 96.99  | 97.05  | 96.70   | 97.23     | 96.95             |
| <b>Total</b>                                            | SNPs identified by the chip            | 25,306    | 23,982    | 26,779   | 28,250      | 26,313   | 27,796 | 26,879 | 27,142  | 27,527    | 27,447            |
|                                                         | Validated by the assembly-based method | 24,731    | 23,593    | 26,330   | 27,845      | 25,869   | 27,287 | 26,488 | 26,616  | 27,058    | 26,914            |
|                                                         | Concordance ratio (%)                  | 97.73     | 98.38     | 98.32    | 98.57       | 98.31    | 98.17  | 98.55  | 98.06   | 98.30     | 98.06             |
| <b>Identified specifically by assembly-based method</b> | Common loci with the chip              | 2,328     | 2,197     | 2,458    | 2,545       | 2,416    | 3,060  | 2,967  | 2,991   | 3,124     | 3,062             |
|                                                         | Validated by the chip                  | 2,253     | 2,146     | 2,398    | 2,507       | 2,358    | 2,962  | 2,873  | 2,881   | 3,021     | 2,952             |
|                                                         | Concordance ratio (%)                  | 96.78     | 97.68     | 97.56    | 98.51       | 97.60    | 96.80  | 96.83  | 96.32   | 96.70     | 96.41             |
