# Supplementary material for: Comprehensive variation discovery and recovery of missing sequence in the pig genome using multiple de novo assemblies
Source: PubMed Central journal article supplement — Genome Res. 2017 May;27(5):865–74. doi: 10.1101/gr.207456.116 (PMC5411780; doi:10.1101/gr.207456.116), 2017-05
Supplement: supp_gr.207456.116_Supplemental_Table_S17.pdf [file supp_gr.207456.116_Supplemental_Table_S17.pdf]

**Supplemental Table S17. Summary of predicted protein-coding genes in the ten pig genomes compared with reference pig genome, human, cow and mouse genomes.**

| Species / Breed   | Gene model number | Average gene model length (bp) | Average CDS length (bp) | Average intron length (bp) | Average intron number per gene | Average exon length (bp) | Average exon number per gene |
|-------------------|-------------------|--------------------------------|-------------------------|----------------------------|--------------------------------|--------------------------|------------------------------|
| Human             | 20,548            | 50,969                         | 1,592                   | 5,924                      | 8.34                           | 171                      | 9.34                         |
| Cow               | 19,970            | 35,523                         | 1,599                   | 3,951                      | 8.59                           | 167                      | 9.59                         |
| Mouse             | 22,852            | 36,340                         | 1,528                   | 4,597                      | 7.57                           | 178                      | 8.57                         |
| Reference genome  | 21,566            | 27,438                         | 1,370                   | 3,506                      | 7.44                           | 162                      | 8.44                         |
| Pig               |                   |                                |                         |                            |                                |                          |                              |
| Hampshire         | 20,850            | 24,805                         | 1,451                   | 3,333                      | 7.01                           | 181                      | 8.01                         |
| Berkshire         | 20,842            | 25,226                         | 1,448                   | 3,386                      | 7.03                           | 180                      | 8.03                         |
| Landrace          | 20,792            | 25,266                         | 1,452                   | 3,380                      | 7.05                           | 180                      | 8.05                         |
| Piétrain          | 20,842            | 25,392                         | 1,449                   | 3,409                      | 7.03                           | 180                      | 8.03                         |
| Large White       | 20,724            | 25,721                         | 1,462                   | 3,412                      | 7.11                           | 180                      | 8.11                         |
| Bamei             | 20,943            | 25,340                         | 1,444                   | 3,409                      | 7.01                           | 180                      | 8.01                         |
| Jinhua            | 20,830            | 25,095                         | 1,459                   | 3,350                      | 7.06                           | 181                      | 8.06                         |
| Meishan           | 20,898            | 25,051                         | 1,445                   | 3,366                      | 7.02                           | 180                      | 8.02                         |
| Rongchang         | 20,646            | 25,750                         | 1,461                   | 3,422                      | 7.10                           | 180                      | 8.10                         |
| Tibetan wild boar | 20,453            | 25,496                         | 1,441                   | 3,408                      | 7.06                           | 179                      | 8.06                         |

Genes with alternative splicing-induced premature termination and defective codon events were not considered.
