# Supplementary material for: Comprehensive variation discovery and recovery of missing sequence in the pig genome using multiple de novo assemblies
Source: PubMed Central journal article supplement — Genome Res. 2017 May;27(5):865–74. doi: 10.1101/gr.207456.116 (PMC5411780; doi:10.1101/gr.207456.116), 2017-05
Supplement: supp_gr.207456.116_Supplemental_Table_S18.pdf [file supp_gr.207456.116_Supplemental_Table_S18.pdf]

**Supplemental Table S18. Assignment of inter-assembly collinear genes of ten breeds based on the Large White assembly.**

|                                | Hampshire                                                                                                             | Berkshire | Landrace | Piértrain | Large White | Bamei  | Jinhua | Meishan | Rongchang | Tibetan wild boar |
|--------------------------------|-----------------------------------------------------------------------------------------------------------------------|-----------|----------|-----------|-------------|--------|--------|---------|-----------|-------------------|
| <b>Genes in whole assembly</b> |                                                                                                                       |           |          |           |             |        |        |         |           |                   |
| <b>Gene number</b>             | 20,850                                                                                                                | 20,842    | 20,792   | 20,842    | 20,724      | 20,943 | 20,830 | 20,898  | 20,646    | 20,453            |
| <b>1 (Singleton)</b>           | 1,230                                                                                                                 | 1,194     | 1,225    | 1,279     | 244         | 1,381  | 1,314  | 1,401   | 1,135     | 1,220             |
| <b>2</b>                       | 12                                                                                                                    | 19        | 11       | 17        | 136         | 11     | 18     | 13      | 13        | 22                |
| <b>3</b>                       | 44                                                                                                                    | 22        | 33       | 38        | 151         | 35     | 30     | 28      | 27        | 45                |
| <b>4</b>                       | 66                                                                                                                    | 62        | 53       | 48        | 168         | 62     | 56     | 42      | 55        | 60                |
| <b>5</b>                       | 92                                                                                                                    | 100       | 83       | 89        | 195         | 91     | 84     | 75      | 76        | 90                |
| <b>6</b>                       | 165                                                                                                                   | 147       | 144      | 130       | 249         | 125    | 141    | 132     | 130       | 131               |
| <b>7</b>                       | 250                                                                                                                   | 263       | 250      | 233       | 362         | 241    | 234    | 239     | 239       | 223               |
| <b>8</b>                       | 392                                                                                                                   | 409       | 389      | 403       | 496         | 403    | 379    | 388     | 376       | 333               |
| <b>9</b>                       | 1,277                                                                                                                 | 1,304     | 1,282    | 1,283     | 1,401       | 1,272  | 1,252  | 1,258   | 1,273     | 1,007             |
| <b>10</b>                      | <b>17,322</b>                                                                                                         |           |          |           |             |        |        |         |           |                   |
|                                | <b>17,042 (98.38%) out of 17,322 are also been determined by the Rongchang assembly-based alignment <sup>a</sup>.</b> |           |          |           |             |        |        |         |           |                   |
| <b>Missing genes</b>           |                                                                                                                       |           |          |           |             |        |        |         |           |                   |
| <b>Missing gene number</b>     | 1,105                                                                                                                 | 1,092     | 1,093    | 1,096     | 1,105       | 1,104  | 1,090  | 1,116   | 1,064     | 1,094             |
| <b>1 (Singleton)</b>           | 67                                                                                                                    | 63        | 65       | 60        | 14          | 83     | 65     | 95      | 49        | 85                |
| <b>2</b>                       | 1                                                                                                                     | 0         | 2        | 2         | 7           | 0      | 0      | 1       | 0         | 1                 |
| <b>3</b>                       | 5                                                                                                                     | 3         | 3        | 7         | 16          | 2      | 3      | 3       | 0         | 6                 |
| <b>4</b>                       | 0                                                                                                                     | 1         | 2        | 3         | 5           | 1      | 2      | 0       | 3         | 3                 |
| <b>5</b>                       | 7                                                                                                                     | 7         | 5        | 7         | 12          | 4      | 4      | 3       | 3         | 8                 |
| <b>6</b>                       | 15                                                                                                                    | 12        | 8        | 11        | 20          | 9      | 11     | 11      | 10        | 13                |
| <b>7</b>                       | 22                                                                                                                    | 18        | 22       | 19        | 30          | 21     | 20     | 22      | 18        | 18                |
| <b>8</b>                       | 30                                                                                                                    | 32        | 29       | 34        | 39          | 28     | 32     | 30      | 26        | 32                |
| <b>9</b>                       | 87                                                                                                                    | 85        | 86       | 82        | 91          | 85     | 82     | 80      | 84        | 57                |
| <b>10</b>                      | <b>871</b>                                                                                                            |           |          |           |             |        |        |         |           |                   |

<sup>a</sup> To confirm the assignment of inter-assembly collinear genes using the Large White assembly-based alignment, we also determined the pairwise collinear relationships of gene pairs among ten assemblies using the Rongchang assembly-based alignment which has the second longest scaffold N50 size (2.36 Mb), and found that out of 17,322 inter-assembly collinear genes that were shared in all ten assemblies using the Large White assembly-based alignment, 17,322 (98.38%) were identified using the Rongchang assembly-based alignment.
