# Supplementary material for: Comprehensive variation discovery and recovery of missing sequence in the pig genome using multiple de novo assemblies
Source: HighWire-hosted journal article supplement (doi:10.1101/gr.207456.116), 2016-09-19
Supplement: Supplemental_Table_S10.xlsx [file Supplemental_Table_S10.xlsx]

## Sheet: Supplemental Table S10
Supplemental Table S10. List of short indels (1-15 bp in length) that occurred in CDS regions.
Solid circle (●) indicates that a indel were detected in a assembly while open circle (○) indicates otherwise.
Chromosome	Start	End	Indel	Length of indel (bp)	Tibetan wild boar	Rongchang	Meishan	Jinhua	Bamei	Large White	Piétrain	Landrace	Berkshire	Hampshire	Indel annotation	Transcript ID	Gene ID	Exon ID	Gene symbol
1	2716638	2716638	Deletion	1	○	○	●	●	○	●	●	○	●	●	Frameshift	ENSSSCT00000004441	ENSSSCG00000004016	Exon 1	KIF25
1	2735406	2735406	Insertion	9	○	○	○	●	○	●	○	●	●	●	Nonframeshift	ENSSSCT00000004443	ENSSSCG00000004018	Exon 29	MLLT4
1	3253029	3253029	Insertion	1	●	○	○	○	○	○	○	○	○	○	Frameshift	ENSSSCT00000004448	ENSSSCG00000004023	Exon 9	FGFR1OP
1	3256843	3256846	Deletion	4	○	○	○	○	○	○	○	○	○	●	Frameshift	ENSSSCT00000004448	ENSSSCG00000004023	Exon 6	FGFR1OP
1	8498156	8498156	Deletion	1	○	●	○	○	○	●	○	○	○	○	Frameshift	ENSSSCT00000027521	ENSSSCG00000025030	Exon 9
1	9878227	9878229	Deletion	3	○	○	●	○	○	○	○	○	○	○	Nonframeshift	ENSSSCT00000004480	ENSSSCG00000004052	Exon 11	FNDC1
1	9878445	9878445	Insertion	3	○	●	○	○	○	○	○	○	○	○	Nonframeshift	ENSSSCT00000004480	ENSSSCG00000004052	Exon 11	FNDC1
1	9893075	9893075	Insertion	1	○	●	●	●	○	○	●	●	○	●	Frameshift	ENSSSCT00000004480	ENSSSCG00000004052	Exon 5	FNDC1
1	10050379	10050379	Insertion	1	●	●	●	●	●	●	●	●	○	●	Frameshift	ENSSSCT00000004481	ENSSSCG00000004053	Exon 9	TAGAP
1	10077377	10077377	Insertion	1	○	○	●	○	○	○	○	○	○	○	Frameshift	ENSSSCT00000004483	ENSSSCG00000004055	Exon 1	RSPH3
1	11138449	11138453	Deletion	5	○	●	○	○	○	○	○	○	○	○	Frameshift	ENSSSCT00000032465	ENSSSCG00000012315	Exon 28	SYNJ2
1	14107620	14107622	Deletion	3	○	○	○	○	○	○	●	○	●	○	Nonframeshift	ENSSSCT00000004499	ENSSSCG00000004070	Exon 12	SCAF8
1	14166443	14166443	Insertion	1	○	●	○	○	○	○	○	○	○	○	Frameshift	ENSSSCT00000004499	ENSSSCG00000004070	Exon 2	SCAF8
1	16081863	16081863	Deletion	1	○	●	○	○	○	●	○	○	○	○	Frameshift	ENSSSCT00000004510	ENSSSCG00000004081	Exon 53	SYNE1
1	16090236	16090236	Insertion	1	●	●	○	○	○	●	○	○	●	○	Frameshift	ENSSSCT00000004510	ENSSSCG00000004081	Exon 44	SYNE1
1	16135786	16135786	Insertion	1	●	●	●	○	○	●	○	○	●	○	Frameshift	ENSSSCT00000004510	ENSSSCG00000004081	Exon 20	SYNE1
1	16348796	16348796	Insertion	1	●	●	○	○	○	●	●	●	○	○	Frameshift	ENSSSCT00000031249	ENSSSCG00000021273	Exon 18
1	16504194	16504194	Deletion	1	●	●	○	○	●	○	○	●	○	○	Frameshift	ENSSSCT00000004511	ENSSSCG00000004082	Exon 45
1	17896779	17896779	Insertion	1	○	○	○	●	○	○	○	○	○	○	Frameshift	ENSSSCT00000004525	ENSSSCG00000004093	Exon 3	IYD
1	17896781	17896781	Insertion	1	●	●	●	○	●	●	○	○	●	○	Frameshift	ENSSSCT00000004525	ENSSSCG00000004093	Exon 3	IYD
1	18201272	18201272	Insertion	1	○	●	○	○	○	○	○	○	○	○	Frameshift	ENSSSCT00000004531	ENSSSCG00000004098	Exon 3	RAET1E
1	18878413	18878415	Deletion	3	○	●	○	○	○	○	○	○	○	○	Nonframeshift	ENSSSCT00000004545	ENSSSCG00000004110	Exon 3	TAB2
1	18878881	18878881	Insertion	1	●	●	○	●	●	●	○	●	●	○	Frameshift	ENSSSCT00000004545	ENSSSCG00000004110	Exon 2	TAB2
1	24129555	24129557	Deletion	3	○	○	○	○	○	●	●	○	●	●	Nonframeshift	ENSSSCT00000004568	ENSSSCG00000004133	Exon 1	FUCA2
1	32069457	32069457	Insertion	3	●	○	○	○	○	○	○	○	○	○	Nonframeshift	ENSSSCT00000004605	ENSSSCG00000004166	Exon 5	AHI1
1	32519096	32519096	Deletion	1	○	●	●	●	○	●	●	●	●	●	Frameshift	ENSSSCT00000004608	ENSSSCG00000004169	Exon 9	HBS1L
1	34646063	34646063	Insertion	1	○	○	○	○	○	○	●	○	○	○	Frameshift	ENSSSCT00000029200	ENSSSCG00000027456	Exon 1
1	34683015	34683015	Insertion	1	○	○	●	○	○	○	○	○	○	○	Frameshift	ENSSSCT00000004628	ENSSSCG00000004189	Exon 1	TAAR9
1	40863955	40863957	Deletion	3	○	○	○	●	●	○	○	○	○	○	Nonframeshift	ENSSSCT00000027938	ENSSSCG00000004222	Exon 8	NCOA7
1	44117120	44117124	Deletion	5	○	○	○	○	○	○	○	○	●	○	Frameshift	ENSSSCT00000004680	ENSSSCG00000004235	Exon 4	RBBP8
1	44117840	44117840	Insertion	4	○	○	○	○	○	●	○	○	○	○	Stopgain	ENSSSCT00000004680	ENSSSCG00000004235	Exon 7	RBBP8
1	44118080	44118080	Deletion	1	○	○	○	○	○	○	○	○	●	○	Frameshift	ENSSSCT00000004680	ENSSSCG00000004235	Exon 8	RBBP8
1	49833965	49833965	Insertion	5	○	○	○	●	○	○	○	○	○	○	Frameshift	ENSSSCT00000029401	ENSSSCG00000026978	Exon 40	ROS1
1	56035399	56035399	Insertion	1	●	○	●	●	●	○	●	●	○	●	Frameshift	ENSSSCT00000004721	ENSSSCG00000004272	Exon 15	LMBRD1
1	57378380	57378380	Deletion	1	○	○	●	●	●	●	●	●	○	○	Frameshift	ENSSSCT00000024170	ENSSSCG00000026246	Exon 2	B3GAT2
1	61987612	61987612	Insertion	1	○	○	●	○	○	○	○	○	○	○	Frameshift	ENSSSCT00000004749	ENSSSCG00000004295	Exon 2	HTR1E
1	63575992	63575992	Deletion	1	○	○	○	●	●	○	○	○	○	○	Frameshift	ENSSSCT00000029164	ENSSSCG00000025426	Exon 4	RNGTT
1	64539038	64539038	Insertion	1	●	○	●	●	●	●	●	○	●	●	Frameshift	ENSSSCT00000004778	ENSSSCG00000004322	Exon 12	ANKRD6
1	64539123	64539123	Insertion	1	●	○	●	●	●	●	●	○	●	●	Frameshift	ENSSSCT00000004778	ENSSSCG00000004322	Exon 12	ANKRD6
1	64800570	64800578	Deletion	9	○	○	○	●	○	○	○	○	○	○	Nonframeshift	ENSSSCT00000004787	ENSSSCG00000004331	Exon 6	CASP8AP2
1	64804517	64804519	Deletion	3	○	○	○	●	○	○	○	○	○	○	Nonframeshift	ENSSSCT00000004787	ENSSSCG00000004331	Exon 7	CASP8AP2
1	76055207	76055207	Insertion	1	○	●	●	●	●	●	●	●	●	○	Stopgain	ENSSSCT00000004814	ENSSSCG00000004357	Exon 8	SIM1
1	80301174	80301174	Deletion	1	●	●	●	○	○	●	○	●	●	●	Frameshift	ENSSSCT00000004823	ENSSSCG00000004364	Exon 18	HACE1
1	82937830	82937832	Deletion	3	○	●	●	●	○	○	○	○	○	○	Nonframeshift	ENSSSCT00000004840	ENSSSCG00000004379	Exon 3	SOBP
1	85203527	85203532	Deletion	6	○	●	○	○	●	○	○	○	○	○	Nonframeshift	ENSSSCT00000004869	ENSSSCG00000004406	Exon 1	GPR6
1	85879764	85879764	Deletion	1	○	○	●	●	○	●	●	●	●	●	Frameshift	ENSSSCT00000004864	ENSSSCG00000004401	Exon 5	DDO
1	85879838	85879838	Deletion	1	○	○	●	●	○	●	●	●	●	●	Frameshift	ENSSSCT00000004864	ENSSSCG00000004401	Exon 3	DDO
1	88072991	88073005	Deletion	15	○	●	○	○	○	●	●	○	○	○	Nonframeshift	ENSSSCT00000004892	ENSSSCG00000004427	Exon 3
1	89853997	89853997	Deletion	1	○	○	●	○	●	●	○	○	○	●	Frameshift	ENSSSCT00000032353	ENSSSCG00000023610	Exon 2	MARCKS
1	100906640	100906640	Insertion	1	○	○	○	○	○	●	○	○	○	○	Frameshift	ENSSSCT00000004944	ENSSSCG00000004477	Exon 15	IMPG1
1	105770732	105770732	Insertion	1	○	○	○	○	○	○	○	○	○	●	Frameshift	ENSSSCT00000027237	ENSSSCG00000021072	Exon 1	EPG5
1	108449579	108449579	Deletion	1	○	○	○	○	○	●	○	●	○	●	Frameshift	ENSSSCT00000027450	ENSSSCG00000029642	Exon 3	RPL17
1	110363720	110363720	Insertion	1	●	●	●	○	●	●	●	●	●	●	Frameshift	ENSSSCT00000004994	ENSSSCG00000004522	Exon 9	ME2
1	110463702	110463702	Insertion	1	●	○	●	○	●	●	●	○	●	●	Frameshift	ENSSSCT00000026385	ENSSSCG00000024479	Exon 2	ELAC1
1	123224219	123224219	Insertion	1	○	○	○	●	○	○	●	●	○	●	Frameshift	ENSSSCT00000005055	ENSSSCG00000004576	Exon 6	RORA
1	123224252	123224252	Insertion	1	○	○	○	●	○	○	●	●	○	●	Frameshift	ENSSSCT00000005055	ENSSSCG00000004576	Exon 6	RORA
1	124938932	124938932	Insertion	1	○	○	○	○	○	○	○	●	○	●	Frameshift	ENSSSCT00000005069	ENSSSCG00000004588	Exon 3	CCNB2
1	125147013	125147013	Insertion	1	●	○	○	○	○	○	○	○	○	●	Frameshift	ENSSSCT00000005073	ENSSSCG00000004592	Exon 4	SLTM
1	141228576	141228576	Insertion	1	○	●	●	○	●	●	●	●	●	●	Frameshift	ENSSSCT00000005164	ENSSSCG00000004678	Exon 15	DUOX2
1	141234671	141234671	Insertion	1	○	●	●	○	●	●	●	●	●	●	Frameshift	ENSSSCT00000005164	ENSSSCG00000004678	Exon 27	DUOX2
1	142766429	142766429	Insertion	1	○	●	●	●	●	●	●	●	●	●	Frameshift	ENSSSCT00000005196	ENSSSCG00000004705	Exon 3	MAP1A
1	143556612	143556612	Deletion	1	○	●	●	●	●	○	○	○	○	○	Frameshift	ENSSSCT00000005213	ENSSSCG00000004720	Exon 9	STARD9
1	143961947	143961947	Insertion	1	●	○	○	●	●	●	●	●	●	●	Frameshift	ENSSSCT00000005225	ENSSSCG00000004729	Exon 6	GANC
1	143995381	143995383	Deletion	3	●	○	●	●	●	○	○	○	○	○	Nonframeshift	ENSSSCT00000005226	ENSSSCG00000004730	Exon 3	TMEM87A
1	144900709	144900709	Insertion	1	○	○	●	●	○	○	○	○	○	●	Frameshift	ENSSSCT00000005243	ENSSSCG00000004744	Exon 1	TYRO3
1	145747981	145747981	Deletion	1	○	○	●	●	●	○	○	○	○	●	Frameshift	ENSSSCT00000005264	ENSSSCG00000004765	Exon 8	RMDN3
1	146214677	146214677	Deletion	1	○	○	●	●	●	●	●	●	○	●	Frameshift	ENSSSCT00000032164	ENSSSCG00000029381	Exon 5
1	146349306	146349306	Deletion	1	○	○	○	●	○	●	○	○	○	○	Frameshift	ENSSSCT00000030353	ENSSSCG00000027242	Exon 2
1	146349400	146349400	Deletion	1	●	○	○	●	○	●	○	○	○	○	Frameshift	ENSSSCT00000030353	ENSSSCG00000027242	Exon 2
1	146349454	146349454	Deletion	1	○	○	○	●	○	○	○	○	○	○	Frameshift	ENSSSCT00000030353	ENSSSCG00000027242	Exon 2
1	155377687	155377687	Deletion	1	●	●	○	○	●	○	●	●	○	●	Frameshift	ENSSSCT00000005322	ENSSSCG00000004820	Exon 5	LINS
1	158315059	158315059	Deletion	1	○	●	○	○	○	●	○	○	●	○	Frameshift	ENSSSCT00000005337	ENSSSCG00000004835	Exon 1	MAGEL2
1	158315112	158315112	Insertion	1	○	●	○	○	○	●	○	●	●	○	Frameshift	ENSSSCT00000005337	ENSSSCG00000004835	Exon 1	MAGEL2
1	161849197	161849197	Insertion	1	○	●	○	○	○	●	●	○	○	●	Frameshift	ENSSSCT00000005364	ENSSSCG00000004858	Exon 2	SALL3
1	163275920	163275920	Insertion	1	○	○	●	●	○	○	○	○	○	●	Frameshift	ENSSSCT00000025136	ENSSSCG00000023533	Exon 21	ZNF236
1	172954114	172954114	Deletion	1	○	○	○	●	○	○	●	●	○	●	Frameshift	ENSSSCT00000005391	ENSSSCG00000004885	Exon 4	CDH19
1	176408986	176408986	Insertion	1	●	●	●	●	○	○	●	●	○	○	Frameshift	ENSSSCT00000005403	ENSSSCG00000004897	Exon 12	ZCCHC2
1	176595816	176595816	Insertion	3	○	●	○	●	○	○	○	○	○	○	Nonframeshift	ENSSSCT00000028414	ENSSSCG00000004898	Exon 9	TNFRSF11A
1	176608528	176608528	Insertion	1	○	●	○	●	●	●	●	○	●	●	Frameshift	ENSSSCT00000028414	ENSSSCG00000004898	Exon 8	TNFRSF11A
1	176608609	176608609	Insertion	1	○	●	○	●	●	●	●	○	●	●	Frameshift	ENSSSCT00000028414	ENSSSCG00000004898	Exon 8	TNFRSF11A
1	176608681	176608681	Insertion	1	○	●	○	●	●	●	●	○	●	●	Frameshift	ENSSSCT00000028414	ENSSSCG00000004898	Exon 8	TNFRSF11A
1	179205681	179205681	Insertion	1	●	●	○	●	○	●	○	●	●	●	Frameshift	ENSSSCT00000005415	ENSSSCG00000004908	Exon 12	LMAN1
1	179851890	179851904	Deletion	15	●	●	○	○	○	○	○	○	○	○	Nonframeshift	ENSSSCT00000005427	ENSSSCG00000004918	Exon 4	ALPK2
1	180053016	180053016	Deletion	1	○	○	○	●	○	○	○	○	○	○	Frameshift	ENSSSCT00000005429	ENSSSCG00000004919	Exon 12	NEDD4L
1	180053794	180053794	Insertion	1	●	●	○	●	○	○	○	○	○	○	Frameshift	ENSSSCT00000005429	ENSSSCG00000004919	Exon 10	NEDD4L
1	180053800	180053800	Insertion	1	○	○	○	○	○	○	○	○	○	●	Frameshift	ENSSSCT00000005429	ENSSSCG00000004919	Exon 10	NEDD4L
1	180924100	180924100	Deletion	1	●	●	●	●	○	●	○	●	●	●	Frameshift	ENSSSCT00000005442	ENSSSCG00000004932	Exon 13	IGDCC3
1	181406954	181406954	Insertion	1	○	●	●	●	○	●	○	●	●	●	Frameshift	ENSSSCT00000005449	ENSSSCG00000004938	Exon 2	DENND4A
1	181407042	181407042	Insertion	1	○	●	●	●	○	●	○	●	●	●	Frameshift	ENSSSCT00000005449	ENSSSCG00000004938	Exon 1	DENND4A
1	195242849	195242849	Insertion	3	●	○	○	○	○	●	○	○	○	●	Nonframeshift	ENSSSCT00000005515	ENSSSCG00000005000	Exon 14	FANCM
1	205508200	205508200	Insertion	1	○	○	○	●	●	●	●	○	○	●	Frameshift	ENSSSCT00000005577	ENSSSCG00000005060	Exon 27	KTN1
1	207103241	207103241	Deletion	1	○	○	●	○	●	●	●	●	●	●	Frameshift	ENSSSCT00000005581	ENSSSCG00000005064	Exon 1	NAA30
1	211718599	211718599	Deletion	1	●	○	○	●	○	○	○	○	○	○	Frameshift	ENSSSCT00000005616	ENSSSCG00000005095	Exon 5	PRKCH
1	211815108	211815108	Insertion	1	●	●	○	●	●	●	●	●	●	●	Frameshift	ENSSSCT00000005616	ENSSSCG00000005095	Exon 12	PRKCH
1	218164842	218164842	Insertion	1	●	○	●	○	○	○	○	○	○	○	Frameshift	ENSSSCT00000005645	ENSSSCG00000005121	Exon 2	EQTN
1	218188240	218188240	Insertion	1	●	○	●	○	○	○	○	○	○	○	Frameshift	ENSSSCT00000025893	ENSSSCG00000029934	Exon 9
1	224699146	224699146	Insertion	1	○	●	○	○	○	○	○	○	○	○	Frameshift	ENSSSCT00000005677	ENSSSCG00000005149	Exon 1
1	225523118	225523118	Deletion	1	○	○	●	●	○	○	●	●	○	●	Frameshift	ENSSSCT00000005692	ENSSSCG00000005164	Exon 5	PTPLAD2
1	229132373	229132373	Deletion	1	●	●	●	○	●	○	○	○	●	●	Stopgain	ENSSSCT00000005709	ENSSSCG00000005178	Exon 23	CNTLN
1	233133342	233133342	Deletion	1	●	○	●	●	●	○	○	●	○	●	Frameshift	ENSSSCT00000005723	ENSSSCG00000005191	Exon 10	MPDZ
1	240854292	240854304	Deletion	13	○	○	○	●	○	○	○	○	○	○	Frameshift	ENSSSCT00000005730	ENSSSCG00000005198	Exon 15	KDM4C
1	242728874	242728874	Insertion	1	●	●	●	●	○	●	○	●	●	○	Frameshift	ENSSSCT00000005748	ENSSSCG00000005215	Exon 16	JAK2
1	242728889	242728889	Deletion	1	●	○	●	●	○	●	○	●	○	○	Frameshift	ENSSSCT00000005748	ENSSSCG00000005215	Exon 16	JAK2
1	246950519	246950519	Deletion	1	●	○	○	○	○	○	○	○	○	○	Frameshift	ENSSSCT00000005767	ENSSSCG00000005233	Exon 5	DMRT2
1	247104126	247104128	Deletion	3	○	○	○	○	○	●	○	○	○	○	Nonframeshift	ENSSSCT00000005770	ENSSSCG00000005236	Exon 1	DMRT1
1	251824995	251824995	Insertion	12	○	●	●	○	○	○	●	○	●	○	Stopgain	ENSSSCT00000026837	ENSSSCG00000021531	Exon 4	C9orf85
1	254628470	254628470	Insertion	1	●	●	○	●	○	●	○	●	●	●	Frameshift	ENSSSCT00000005803	ENSSSCG00000005268	Exon 5	RORB
1	254739036	254739036	Insertion	1	●	●	○	●	○	●	○	●	●	●	Frameshift	ENSSSCT00000005804	ENSSSCG00000005269	Exon 30	TRPM6
1	256398205	256398205	Deletion	1	○	●	●	○	○	●	●	○	●	●	Frameshift	ENSSSCT00000005813	ENSSSCG00000005278	Exon 3	PRUNE2
1	263371466	263371466	Insertion	1	○	●	○	○	●	●	●	●	○	○	Frameshift	ENSSSCT00000005835	ENSSSCG00000005298	Exon 3	C9orf131
1	263419113	263419113	Insertion	1	○	●	○	○	●	●	●	●	○	○	Frameshift	ENSSSCT00000005840	ENSSSCG00000005302	Exon 3	STOML2
1	264160049	264160049	Insertion	1	●	●	●	○	○	●	●	●	○	○	Frameshift	ENSSSCT00000005856	ENSSSCG00000005317	Exon 21	TLN1
1	264166139	264166139	Insertion	1	○	○	●	○	○	○	○	○	○	○	Frameshift	ENSSSCT00000005856	ENSSSCG00000005317	Exon 10	TLN1
1	264167594	264167594	Insertion	1	○	●	●	○	○	○	○	○	○	○	Frameshift	ENSSSCT00000005856	ENSSSCG00000005317	Exon 8	TLN1
1	266502747	266502747	Deletion	1	○	○	○	○	●	●	○	●	○	○	Frameshift	ENSSSCT00000005896	ENSSSCG00000005356	Exon 3	DCAF10
1	269819876	269819881	Deletion	6	●	●	●	○	●	○	○	●	○	○	Nonframeshift	ENSSSCT00000005925	ENSSSCG00000005385	Exon 1	NR4A3
1	270383168	270383168	Insertion	3	○	○	●	○	○	○	○	○	○	○	Nonframeshift	ENSSSCT00000005931	ENSSSCG00000005388	Exon 11	INVS
1	270383168	270383168	Insertion	3	○	●	○	○	○	○	○	●	○	○	Nonframeshift	ENSSSCT00000005931	ENSSSCG00000005388	Exon 11	INVS
1	276512640	276512643	Deletion	4	○	○	●	●	○	○	○	○	○	○	Frameshift	ENSSSCT00000005969	ENSSSCG00000005426	Exon 7	FSD1L
1	276767928	276767928	Insertion	1	○	●	○	○	○	○	○	●	○	●	Frameshift	ENSSSCT00000005973	ENSSSCG00000005429	Exon 1	TMEM38B
1	277198962	277198965	Deletion	4	○	●	○	○	○	○	○	○	○	○	Frameshift	ENSSSCT00000005974	ENSSSCG00000005430	Exon 1	RBM3
1	277199163	277199163	Deletion	1	○	●	○	○	○	○	○	○	○	○	Frameshift	ENSSSCT00000005974	ENSSSCG00000005430	Exon 2	RBM3
1	280435757	280435757	Deletion	1	○	●	○	●	○	●	●	●	●	●	Frameshift	ENSSSCT00000005984	ENSSSCG00000005440	Exon 1	FAM206A
1	282504285	282504285	Deletion	1	○	○	○	○	○	●	○	○	○	○	Frameshift	ENSSSCT00000006001	ENSSSCG00000005456	Exon 12	MUSK
1	282504294	282504294	Deletion	1	○	○	○	○	●	○	○	○	○	○	Frameshift	ENSSSCT00000006001	ENSSSCG00000005456	Exon 12	MUSK
1	284649232	284649232	Deletion	1	○	○	○	●	○	●	●	●	○	○	Frameshift	ENSSSCT00000024664	ENSSSCG00000024123	Exon 2	CDC26
1	284649261	284649261	Insertion	1	○	○	○	●	○	●	●	●	○	○	Frameshift	ENSSSCT00000024664	ENSSSCG00000024123	Exon 2	CDC26
1	285746649	285746649	Deletion	1	●	○	○	○	○	○	○	●	●	○	Frameshift	ENSSSCT00000006032	ENSSSCG00000005486	Exon 3	KIF12
1	287973279	287973279	Insertion	1	●	●	●	●	●	●	●	●	●	●	Frameshift	ENSSSCT00000006045	ENSSSCG00000005498	Exon 5	PAPPA
1	289160195	289160207	Deletion	13	○	○	●	○	●	○	●	●	●	○	Frameshift	ENSSSCT00000023014	ENSSSCG00000027360	Exon 3	ASTN2
1	292956733	292956733	Insertion	1	●	○	○	○	○	○	○	○	○	○	Frameshift	ENSSSCT00000006057	ENSSSCG00000005507	Exon 4
1	294571707	294571710	Deletion	4	○	●	●	○	○	○	○	○	○	○	Frameshift	ENSSSCT00000006080	ENSSSCG00000005529	Exon 6	MORN5
1	297292717	297292717	Insertion	1	●	●	●	○	○	●	○	○	○	○	Frameshift	ENSSSCT00000006129	ENSSSCG00000005576	Exon 1	ZBTB6
1	297292751	297292751	Deletion	1	●	●	●	●	○	●	○	○	○	○	Frameshift	ENSSSCT00000006129	ENSSSCG00000005576	Exon 1	ZBTB6
1	299188165	299188165	Deletion	1	●	○	○	○	○	○	○	○	○	○	Frameshift	ENSSSCT00000029437	ENSSSCG00000023876	Exon 3	NR5A1
1	299978145	299978145	Deletion	1	●	○	○	○	○	○	○	○	○	○	Frameshift	ENSSSCT00000006160	ENSSSCG00000005602	Exon 23	GAPVD1
1	299978206	299978206	Insertion	1	●	○	○	○	○	○	○	○	○	○	Frameshift	ENSSSCT00000006160	ENSSSCG00000005602	Exon 24	GAPVD1
1	302227438	302227438	Insertion	1	○	○	○	○	●	○	○	○	○	○	Frameshift	ENSSSCT00000006186	ENSSSCG00000005626	Exon 7	FPGS
1	302229061	302229061	Deletion	1	○	○	○	○	○	○	○	○	●	○	Frameshift	ENSSSCT00000006186	ENSSSCG00000005626	Exon 13	FPGS
1	302920817	302920817	Insertion	9	○	○	○	●	○	○	○	○	○	○	Nonframeshift	ENSSSCT00000006215	ENSSSCG00000005652	Exon 2	GLE1
1	303101793	303101793	Deletion	1	○	○	●	○	●	●	○	●	●	●	Frameshift	ENSSSCT00000006220	ENSSSCG00000005657	Exon 15	PKN3
1	303430729	303430729	Deletion	1	○	○	○	○	○	○	○	○	●	○	Frameshift	ENSSSCT00000006235	ENSSSCG00000005672	Exon 5	PPP2R4
1	303430729	303430734	Deletion	6	●	○	●	●	●	○	○	○	○	○	Nonframeshift	ENSSSCT00000006235	ENSSSCG00000005672	Exon 5	PPP2R4
1	305353805	305353807	Deletion	3	○	○	○	○	○	●	○	○	○	●	Nonframeshift	ENSSSCT00000026639	ENSSSCG00000022130	Exon 1
1	305471649	305471649	Deletion	1	○	○	●	○	●	○	○	○	○	○	Frameshift	ENSSSCT00000023930	ENSSSCG00000027241	Exon 16
1	305472020	305472026	Deletion	7	○	○	●	○	●	●	●	●	○	●	Frameshift	ENSSSCT00000023930	ENSSSCG00000027241	Exon 14
1	305474265	305474265	Deletion	1	○	○	●	○	○	○	○	○	○	○	Frameshift	ENSSSCT00000023930	ENSSSCG00000027241	Exon 11
1	305484065	305484065	Insertion	1	○	○	○	○	○	●	●	●	○	●	Frameshift	ENSSSCT00000023930	ENSSSCG00000027241	Exon 3
1	306284424	306284424	Insertion	1	○	○	○	○	○	○	○	●	○	○	Frameshift	ENSSSCT00000028219	ENSSSCG00000026458	Exon 1	DKFZp313A047
1	306486437	306486439	Deletion	3	○	○	○	○	●	○	○	○	○	○	Nonframeshift	ENSSSCT00000006300	ENSSSCG00000005729	Exon 1	DDX31
1	308684736	308684738	Deletion	3	○	●	○	○	○	○	○	○	○	○	Nonframeshift	ENSSSCT00000006334	ENSSSCG00000005758	Exon 2	GLT6D1
1	309052548	309052549	Deletion	2	○	○	●	○	○	○	○	○	○	○	Frameshift	ENSSSCT00000006339	ENSSSCG00000005763	Exon 9	ZNF761
1	313570264	313570264	Insertion	1	○	○	○	○	●	○	○	○	○	○	Frameshift	ENSSSCT00000025607	ENSSSCG00000028938	Exon 2	OR4A47
1	313775045	313775045	Insertion	3	○	○	○	○	●	○	○	○	○	○	Nonframeshift	ENSSSCT00000006417	ENSSSCG00000005838	Exon 8	TRAF2
1	314158926	314158926	Insertion	1	○	●	○	●	○	●	●	○	○	○	Frameshift	ENSSSCT00000006438	ENSSSCG00000005859	Exon 6	NDOR1
2	43030	43030	Insertion	1	○	○	●	●	●	○	●	●	○	○	Frameshift	ENSSSCT00000025588	ENSSSCG00000012835	Exon 17	MUC6
2	43428	43428	Insertion	1	○	○	●	●	●	○	○	●	○	○	Frameshift	ENSSSCT00000025588	ENSSSCG00000012835	Exon 19	MUC6
2	43513	43513	Insertion	1	○	○	●	●	●	○	○	●	○	○	Frameshift	ENSSSCT00000025588	ENSSSCG00000012835	Exon 19	MUC6
2	151704	151704	Insertion	6	○	●	○	○	○	○	○	○	○	○	Nonframeshift	ENSSSCT00000032266	ENSSSCG00000023933	Exon 5	CRACR2B
2	250063	250063	Insertion	1	○	●	●	●	●	●	●	●	●	○	Frameshift	ENSSSCT00000014045	ENSSSCG00000012850	Exon 5	DEAF1
2	443455	443455	Insertion	1	○	○	○	○	○	○	●	○	○	●	Frameshift	ENSSSCT00000014052	ENSSSCG00000012856	Exon 14	NAP1L4
2	692852	692852	Insertion	1	○	○	○	○	○	○	○	○	●	○	Frameshift	ENSSSCT00000014056	ENSSSCG00000012860	Exon 6	ATF4
2	2855083	2855083	Deletion	1	○	●	○	○	○	○	○	○	○	○	Frameshift	ENSSSCT00000014079	ENSSSCG00000012880	Exon 5
2	2855119	2855119	Deletion	1	○	○	●	○	●	○	○	○	○	○	Frameshift	ENSSSCT00000014079	ENSSSCG00000012880	Exon 5
2	2856102	2856102	Deletion	1	○	●	●	●	○	○	○	○	○	●	Frameshift	ENSSSCT00000014079	ENSSSCG00000012880	Exon 8
2	2856350	2856350	Insertion	1	○	●	●	●	○	●	○	○	○	●	Stopgain	ENSSSCT00000014079	ENSSSCG00000012880	Exon 9
2	3016392	3016392	Insertion	1	●	●	○	●	●	●	○	●	○	●	Frameshift	ENSSSCT00000014085	ENSSSCG00000012884	Exon 14	PPP6R3
2	3097584	3097584	Insertion	1	●	●	●	●	●	●	●	●	●	●	Frameshift	ENSSSCT00000014085	ENSSSCG00000012884	Exon 1	PPP6R3
2	3802068	3802068	Insertion	1	○	●	○	●	●	○	○	●	●	●	Frameshift	ENSSSCT00000014123	ENSSSCG00000012920	Exon 6	CORO1B
2	3818304	3818304	Insertion	1	○	○	○	●	●	●	●	●	●	●	Frameshift	ENSSSCT00000014114	ENSSSCG00000012911	Exon 7	CARNS1
2	3818460	3818460	Deletion	1	●	○	○	●	●	●	●	●	●	●	Frameshift	ENSSSCT00000014114	ENSSSCG00000012911	Exon 6	CARNS1
2	3818475	3818475	Insertion	1	○	○	○	●	●	●	○	○	○	●	Frameshift	ENSSSCT00000014114	ENSSSCG00000012911	Exon 6	CARNS1
2	5490098	5490098	Insertion	3	○	●	○	○	○	○	○	○	○	○	Nonframeshift	ENSSSCT00000014171	ENSSSCG00000012964	Exon 3	TSGA10IP
2	5584177	5584177	Deletion	1	○	○	○	○	●	○	○	○	○	○	Frameshift	ENSSSCT00000014183	ENSSSCG00000012975	Exon 1	SNX32
2	5772520	5772520	Insertion	3	○	●	○	○	●	○	○	○	○	○	Nonframeshift	ENSSSCT00000014193	ENSSSCG00000012983	Exon 35	PCNXL3
2	5858129	5858129	Insertion	1	○	○	○	○	●	○	●	○	○	●	Frameshift	ENSSSCT00000014195	ENSSSCG00000012985	Exon 3	LTBP3
2	5874405	5874405	Deletion	1	○	○	○	○	○	○	○	○	○	●	Frameshift	ENSSSCT00000014198	ENSSSCG00000012988	Exon 12	EHBP1L1
2	6000491	6000491	Deletion	1	●	●	○	○	●	○	●	○	●	○	Frameshift	ENSSSCT00000014204	ENSSSCG00000012994	Exon 1	TIGD3
2	6890621	6890621	Insertion	1	○	●	○	○	○	●	○	●	○	●	Frameshift	ENSSSCT00000014244	ENSSSCG00000013031	Exon 1	KCNK4
2	7506692	7506692	Deletion	1	○	●	○	○	○	●	●	○	●	●	Frameshift	ENSSSCT00000014261	ENSSSCG00000013048	Exon 1	C11orf84
2	7516806	7516809	Deletion	4	●	●	○	○	○	○	○	○	○	○	Frameshift	ENSSSCT00000014265	ENSSSCG00000013051	Exon 1
2	8331667	8331667	Deletion	1	○	●	○	○	●	●	●	●	○	●	Frameshift	ENSSSCT00000022269	ENSSSCG00000020665	Exon 13	TAF6L
2	8408644	8408644	Insertion	8	○	○	○	○	○	○	●	●	●	○	Frameshift	ENSSSCT00000025488	ENSSSCG00000020823	Exon 5	BSCL2
2	8420227	8420227	Insertion	3	○	○	○	○	●	○	●	○	●	○	Nonframeshift	ENSSSCT00000029345	ENSSSCG00000023110	Exon 7	UBXN1
2	8420229	8420229	Insertion	3	○	○	○	○	○	●	○	○	○	○	Nonframeshift	ENSSSCT00000029345	ENSSSCG00000023110	Exon 7	UBXN1
2	8423899	8423899	Insertion	6	○	○	○	○	○	○	●	●	○	○	Nonframeshift	ENSSSCT00000022861	ENSSSCG00000024995	Exon 2	UQCC3
2	9623208	9623208	Insertion	1	○	○	●	●	●	○	●	○	○	○	Stoploss	ENSSSCT00000014300	ENSSSCG00000013082	Exon 4	RP11-286N22.8
2	9630007	9630007	Insertion	9	○	○	○	○	○	○	●	●	○	●	Nonframeshift	ENSSSCT00000014300	ENSSSCG00000013082	Exon 2	RP11-286N22.8
2	9785564	9785564	Insertion	3	○	○	○	○	○	○	○	●	○	○	Nonframeshift	ENSSSCT00000014313	ENSSSCG00000013093	Exon 21	VWCE
2	10828495	10828497	Deletion	3	○	○	○	○	○	○	●	○	●	○	Nonframeshift	ENSSSCT00000030463	ENSSSCG00000022114	Exon 8	MS4A14
2	10916783	10916783	Insertion	3	○	●	●	●	●	○	○	○	○	●	Nonframeshift	ENSSSCT00000014321	ENSSSCG00000013101	Exon 2	MS4A4E
2	10939325	10939325	Insertion	3	○	●	●	●	●	○	○	○	○	○	Nonframeshift	ENSSSCT00000014320	ENSSSCG00000013100	Exon 4	MS4A6E
2	11478121	11478121	Insertion	1	○	●	○	○	○	○	●	○	○	●	Frameshift	ENSSSCT00000014352	ENSSSCG00000013132	Exon 1	OR5A2
2	14117009	14117009	Insertion	1	○	○	○	○	○	○	○	○	●	●	Frameshift	ENSSSCT00000014416	ENSSSCG00000024728	Exon 1	OR5AP2
2	15150154	15150154	Insertion	1	○	○	○	○	●	○	○	○	○	●	Frameshift	ENSSSCT00000015866	ENSSSCG00000014516	Exon 1
2	15383925	15383925	Insertion	3	○	○	●	○	○	○	○	○	○	○	Nonframeshift	ENSSSCT00000026403	ENSSSCG00000024703	Exon 1
2	15679210	15679218	Deletion	9	●	○	○	●	○	○	○	○	○	○	Nonframeshift	ENSSSCT00000022326	ENSSSCG00000023709	Exon 5	PTPRJ
2	17017969	17017969	Deletion	1	○	○	○	○	○	●	●	○	○	○	Frameshift	ENSSSCT00000014468	ENSSSCG00000013248	Exon 2	LRP4
2	17116652	17116652	Deletion	1	●	○	●	●	●	●	○	○	●	○	Frameshift	ENSSSCT00000014469	ENSSSCG00000013249	Exon 17	CKAP5
2	17117658	17117658	Deletion	1	●	○	●	●	●	●	○	●	●	○	Frameshift	ENSSSCT00000014469	ENSSSCG00000013249	Exon 19	CKAP5
2	17117768	17117768	Deletion	1	●	○	●	●	●	●	○	●	●	○	Frameshift	ENSSSCT00000014469	ENSSSCG00000013249	Exon 20	CKAP5
2	17474848	17474850	Deletion	3	○	○	○	●	○	○	○	○	○	○	Nonframeshift	ENSSSCT00000014485	ENSSSCG00000013261	Exon 1	CHRM4
2	17515548	17515548	Deletion	1	○	●	○	●	○	○	○	●	○	○	Frameshift	ENSSSCT00000014483	ENSSSCG00000013259	Exon 5	DGKZ
2	17902344	17902344	Insertion	1	○	○	○	○	○	●	○	●	●	○	Frameshift	ENSSSCT00000014494	ENSSSCG00000013270	Exon 2	CRY2
2	30374203	30374203	Insertion	1	○	○	○	○	○	○	○	○	○	●	Frameshift	ENSSSCT00000029030	ENSSSCG00000030326	Exon 6	TCP11L1
2	30448267	30448267	Deletion	1	○	○	○	○	○	○	○	○	●	●	Frameshift	ENSSSCT00000025799	ENSSSCG00000013314	Exon 15	QSER1
2	32923512	32923526	Deletion	15	○	○	●	○	○	○	○	○	○	○	Nonframeshift	ENSSSCT00000014556	ENSSSCG00000013329	Exon 2	FSHB
2	43168020	43168022	Deletion	3	○	○	○	●	○	○	○	●	○	○	Nonframeshift	ENSSSCT00000014583	ENSSSCG00000013352	Exon 9	E2F8
2	43537744	43537744	Insertion	4	●	○	○	○	○	●	○	●	●	●	Frameshift	ENSSSCT00000014590	ENSSSCG00000013359	Exon 2	IGSF22
2	43543332	43543333	Deletion	2	●	○	●	○	○	○	○	○	○	○	Frameshift	ENSSSCT00000014590	ENSSSCG00000013359	Exon 9	IGSF22
2	43547842	43547842	Deletion	1	○	●	○	○	○	○	○	○	○	○	Frameshift	ENSSSCT00000014590	ENSSSCG00000013359	Exon 13	IGSF22
2	43605948	43605948	Deletion	1	●	●	●	●	●	●	●	●	●	●	Frameshift	ENSSSCT00000024883	ENSSSCG00000026892	Exon 3	SPTY2D1
2	45050566	45050566	Insertion	1	○	○	●	●	○	○	○	○	○	○	Frameshift	ENSSSCT00000024535	ENSSSCG00000025406	Exon 17	PIK3C2A
2	50507901	50507901	Deletion	1	●	●	●	●	●	●	●	●	●	●	Frameshift	ENSSSCT00000028383	ENSSSCG00000021777	Exon 1	MICAL2
2	53308175	53308175	Deletion	1	○	○	○	○	●	○	○	○	○	○	Frameshift	ENSSSCT00000014655	ENSSSCG00000013412	Exon 3	BASP1
2	53337414	53337414	Insertion	1	○	●	○	○	○	○	○	○	○	○	Frameshift	ENSSSCT00000014656	ENSSSCG00000013413	Exon 12	TBC1D3L
2	56514300	56514300	Insertion	1	○	●	○	○	○	○	○	○	○	○	Frameshift	ENSSSCT00000015243	ENSSSCG00000023222	Exon 1
2	59069888	59069888	Deletion	1	●	●	○	○	○	●	○	○	○	○	Frameshift	ENSSSCT00000015195	ENSSSCG00000013909	Exon 7	CRLF1
2	60663093	60663093	Deletion	1	○	○	●	○	○	○	○	○	○	○	Frameshift	ENSSSCT00000015139	ENSSSCG00000013860	Exon 10	CHERP
2	65383222	65383222	Deletion	1	○	●	○	●	●	○	○	●	●	○	Frameshift	ENSSSCT00000015043	ENSSSCG00000013768	Exon 1	CTB-55O6.8
2	68899499	68899499	Deletion	1	○	○	○	●	○	○	○	○	○	○	Frameshift	ENSSSCT00000014935	ENSSSCG00000013671	Exon 5	ZNF562
2	68900437	68900437	Insertion	1	○	●	○	○	○	○	●	○	○	○	Frameshift	ENSSSCT00000014935	ENSSSCG00000013671	Exon 4	ZNF562
2	69135323	69135325	Deletion	3	○	○	●	○	○	○	○	○	●	○	Nonframeshift	ENSSSCT00000024704	ENSSSCG00000027434	Exon 1	OLFM2
2	70470673	70470673	Deletion	1	●	○	●	●	●	○	●	●	●	○	Frameshift	ENSSSCT00000014872	ENSSSCG00000013617	Exon 7	ELAVL3
2	70688271	70688271	Insertion	1	●	○	●	●	○	○	●	●	●	○	Frameshift	ENSSSCT00000014865	ENSSSCG00000013610	Exon 13
2	70720153	70720153	Deletion	1	●	○	○	●	○	○	○	○	○	○	Frameshift	ENSSSCT00000014866	ENSSSCG00000013611	Exon 5
2	72038872	72038872	Insertion	5	○	○	○	○	○	○	○	○	●	○	Frameshift	ENSSSCT00000014824	ENSSSCG00000013572	Exon 19	PNPLA6
2	72038872	72038872	Insertion	1	●	●	○	○	●	○	○	○	○	○	Frameshift	ENSSSCT00000014824	ENSSSCG00000013572	Exon 19	PNPLA6
2	72755204	72755204	Insertion	1	○	○	●	○	○	○	○	●	●	○	Frameshift	ENSSSCT00000014802	ENSSSCG00000013552	Exon 10	GPR108
2	72768062	72768062	Deletion	1	●	○	○	○	○	○	○	○	○	○	Frameshift	ENSSSCT00000014800	ENSSSCG00000013551	Exon 12	C3
2	75041366	75041366	Insertion	1	○	●	●	●	●	●	○	○	●	●	Frameshift	ENSSSCT00000014743	ENSSSCG00000013497	Exon 17	ANKRD24
2	76042740	76042740	Insertion	1	○	●	●	●	○	●	○	●	●	●	Frameshift	ENSSSCT00000031921	ENSSSCG00000028995	Exon 7	TLE2
2	76374655	76374655	Deletion	1	●	●	●	●	●	●	○	●	●	●	Frameshift	ENSSSCT00000014713	ENSSSCG00000013468	Exon 9	THOP1
2	76374717	76374717	Insertion	1	○	●	●	●	●	●	○	●	●	●	Frameshift	ENSSSCT00000014713	ENSSSCG00000013468	Exon 8	THOP1
2	78124462	78124464	Deletion	3	○	○	○	●	○	○	○	○	○	○	Nonframeshift	ENSSSCT00000014678	ENSSSCG00000013434	Exon 1	PLK5
2	82516485	82516485	Insertion	4	○	○	○	○	●	○	○	○	○	○	Frameshift	ENSSSCT00000029659	ENSSSCG00000022508	Exon 2	UIMC1
2	85731853	85731853	Deletion	1	○	○	●	○	○	○	○	○	○	○	Frameshift	ENSSSCT00000015379	ENSSSCG00000014078	Exon 1	RPS17
2	85732065	85732065	Insertion	4	○	○	●	○	○	○	○	○	○	○	Frameshift	ENSSSCT00000015379	ENSSSCG00000014078	Exon 1	RPS17
2	87157353	87157353	Insertion	1	●	○	○	○	○	○	○	○	○	○	Frameshift	ENSSSCT00000015389	ENSSSCG00000014088	Exon 9	IQGAP2
2	88587299	88587311	Deletion	13	○	○	●	○	○	○	○	○	○	○	Frameshift	ENSSSCT00000015403	ENSSSCG00000014101	Exon 23
2	89578149	89578149	Deletion	1	○	○	○	○	○	○	○	○	○	●	Frameshift	ENSSSCT00000015408	ENSSSCG00000014106	Exon 2
2	91247875	91247875	Insertion	1	●	○	●	○	○	○	○	○	○	○	Frameshift	ENSSSCT00000015430	ENSSSCG00000014126	Exon 20	MSH3
2	104882896	104882896	Insertion	1	○	●	●	●	○	○	○	●	●	○	Frameshift	ENSSSCT00000015472	ENSSSCG00000014163	Exon 6	ANKRD32
2	107133381	107133381	Insertion	1	○	●	●	●	●	●	●	●	○	○	Frameshift	ENSSSCT00000015483	ENSSSCG00000014171	Exon 20	ERAP1
2	107412814	107412814	Deletion	1	○	●	●	●	○	○	○	○	●	●	Frameshift	ENSSSCT00000015485	ENSSSCG00000014173	Exon 3	LNPEP
2	112635494	112635494	Insertion	1	○	●	○	○	○	○	○	○	○	○	Frameshift	ENSSSCT00000023670	ENSSSCG00000025802	Exon 6
2	113177945	113177945	Insertion	1	●	●	○	○	○	○	○	○	○	●	Frameshift	ENSSSCT00000015499	ENSSSCG00000014186	Exon 1
2	122039868	122039868	Deletion	1	●	○	●	●	○	○	○	○	●	○	Frameshift	ENSSSCT00000015527	ENSSSCG00000014209	Exon 9	EPB41L4A
2	131120435	131120435	Deletion	1	○	●	●	○	●	●	●	●	○	●	Frameshift	ENSSSCT00000015553	ENSSSCG00000014235	Exon 5	SNCAIP
2	131120450	131120450	Insertion	1	○	●	●	○	●	●	●	●	○	●	Frameshift	ENSSSCT00000015553	ENSSSCG00000014235	Exon 5	SNCAIP
2	133396393	133396393	Insertion	3	○	○	●	○	○	○	○	○	○	○	Nonframeshift	ENSSSCT00000015562	ENSSSCG00000014242	Exon 1	ZNF608
2	137174707	137174707	Insertion	1	●	●	●	●	●	○	●	●	●	●	Frameshift	ENSSSCT00000015578	ENSSSCG00000014257	Exon 10	SLC27A6
2	137455394	137455394	Insertion	3	○	●	○	○	○	○	○	○	○	○	Nonframeshift	ENSSSCT00000015580	ENSSSCG00000014259	Exon 1
2	140363409	140363423	Deletion	15	○	●	●	○	○	○	○	○	○	○	Frameshift	ENSSSCT00000015603	ENSSSCG00000014280	Exon 16	RAD50
2	145544928	145544929	Deletion	2	○	○	○	○	○	●	○	●	○	●	Frameshift	ENSSSCT00000015649	ENSSSCG00000014323	Exon 2
2	145779462	145779476	Deletion	15	○	●	○	●	○	○	○	○	○	○	Frameshift	ENSSSCT00000023052	ENSSSCG00000023647	Exon 4	WNT8A
2	145783357	145783362	Deletion	6	○	●	○	○	○	○	○	○	○	○	Nonframeshift	ENSSSCT00000023052	ENSSSCG00000023647	Exon 9	WNT8A
2	146045708	146045713	Deletion	6	○	○	●	●	○	●	○	○	●	○	Nonframeshift	ENSSSCT00000015658	ENSSSCG00000014331	Exon 1	KDM3B
2	148328453	148328453	Insertion	3	○	○	○	●	○	○	○	○	●	○	Nonframeshift	ENSSSCT00000015702	ENSSSCG00000014372	Exon 21	WDR55
2	149373871	149373871	Insertion	1	○	○	●	●	●	●	●	●	●	●	Frameshift	ENSSSCT00000015724	ENSSSCG00000014387	Exon 22	DIAPH1
2	149427854	149427862	Deletion	9	○	○	○	○	●	●	○	○	○	○	Nonframeshift	ENSSSCT00000015724	ENSSSCG00000014387	Exon 16	DIAPH1
2	154433464	154433464	Insertion	1	○	○	○	○	○	○	○	○	●	○	Frameshift	ENSSSCT00000029561	ENSSSCG00000028976	Exon 13	PPP2R2B
2	155883075	155883077	Deletion	3	●	○	○	○	●	○	○	○	○	○	Nonframeshift	ENSSSCT00000026719	ENSSSCG00000025103	Exon 6	SPINK5
2	157854787	157854792	Deletion	6	○	●	●	○	●	●	○	○	○	○	Nonframeshift	ENSSSCT00000015786	ENSSSCG00000014440	Exon 15	HMGXB3
2	158586574	158586584	Deletion	11	○	●	○	○	●	○	○	○	○	●	Frameshift	ENSSSCT00000015802	ENSSSCG00000014454	Exon 1
2	158677229	158677231	Deletion	3	○	○	○	○	●	○	○	○	○	○	Nonframeshift	ENSSSCT00000015807	ENSSSCG00000014459	Exon 3	OR5L1
2	158694001	158694001	Insertion	1	○	○	●	○	○	●	●	○	○	○	Frameshift	ENSSSCT00000015809	ENSSSCG00000014461	Exon 1
2	159143809	159143812	Deletion	4	○	●	○	○	○	○	○	○	○	○	Frameshift	ENSSSCT00000015827	ENSSSCG00000014477	Exon 1	OR5J2
2	161971872	161971876	Deletion	5	○	○	○	○	○	○	○	○	●	○	Frameshift	ENSSSCT00000023349	ENSSSCG00000021366	Exon 1	OR2T5
3	1070398	1070398	Insertion	2	○	○	○	○	●	○	○	○	○	○	Stopgain	ENSSSCT00000008289	ENSSSCG00000007557	Exon 12	MICALL2
3	1072276	1072278	Deletion	3	○	○	○	●	○	○	○	○	○	○	Nonframeshift	ENSSSCT00000008289	ENSSSCG00000007557	Exon 8	MICALL2
3	1072299	1072299	Deletion	1	○	○	●	○	○	○	○	○	○	○	Frameshift	ENSSSCT00000008289	ENSSSCG00000007557	Exon 8	MICALL2
3	1423374	1423375	Deletion	2	○	○	○	○	○	○	●	●	○	○	Frameshift	ENSSSCT00000024339	ENSSSCG00000030485	Exon 3	ELFN1
3	3675539	3675539	Deletion	1	○	○	○	●	●	●	○	○	○	○	Frameshift	ENSSSCT00000008310	ENSSSCG00000007574	Exon 15	SDK1
3	5197044	5197052	Deletion	9	○	○	●	○	●	○	○	○	○	○	Nonframeshift	ENSSSCT00000008330	ENSSSCG00000007590	Exon 11	PMS2
3	5470560	5470560	Insertion	1	○	●	●	○	○	○	○	○	○	○	Frameshift	ENSSSCT00000008340	ENSSSCG00000007600	Exon 1	BHLHA15
3	5993869	5993869	Insertion	2	○	○	●	○	○	○	○	○	○	○	Frameshift	ENSSSCT00000026054	ENSSSCG00000007606	Exon 1	TRRAP
3	6594032	6594034	Deletion	3	●	○	○	●	●	●	○	○	○	○	Nonframeshift	ENSSSCT00000030708	ENSSSCG00000022023	Exon 5	ZKSCAN5
3	6683353	6683353	Insertion	1	○	○	○	●	●	●	●	○	○	○	Frameshift	ENSSSCT00000008362	ENSSSCG00000007622	Exon 1	ATP5J2-PTCD1
3	7228663	7228663	Deletion	1	●	○	○	○	●	●	○	○	○	○	Frameshift	ENSSSCT00000008371	ENSSSCG00000007631	Exon 4
3	7667501	7667501	Insertion	1	●	○	●	○	○	○	●	●	○	●	Frameshift	ENSSSCT00000008399	ENSSSCG00000007659	Exon 15	ZCWPW1
3	8044727	8044727	Insertion	1	○	●	●	●	○	●	●	●	●	●	Frameshift	ENSSSCT00000008414	ENSSSCG00000007674	Exon 14	ZAN
3	9624991	9624991	Deletion	1	●	●	●	●	○	○	●	○	●	●	Frameshift	ENSSSCT00000025966	ENSSSCG00000024796	Exon 1	UPK3B
3	10365419	10365419	Deletion	1	○	○	○	○	○	○	○	○	●	●	Frameshift	ENSSSCT00000008445	ENSSSCG00000007702	Exon 1	FKBP6
3	10454809	10454809	Insertion	1	○	●	●	●	●	●	●	●	●	●	Frameshift	ENSSSCT00000024638	ENSSSCG00000023004	Exon 1	FZD9
3	10454838	10454838	Deletion	1	○	●	●	●	●	●	●	●	●	●	Frameshift	ENSSSCT00000024638	ENSSSCG00000023004	Exon 1	FZD9
3	11635097	11635108	Deletion	12	○	○	○	○	○	●	○	○	○	○	Nonframeshift	ENSSSCT00000008468	ENSSSCG00000007723	Exon 1	WBSCR16
3	11635103	11635108	Deletion	6	○	○	●	○	●	○	○	●	○	○	Nonframeshift	ENSSSCT00000008468	ENSSSCG00000007723	Exon 1	WBSCR16
3	11692149	11692149	Deletion	1	●	●	●	●	●	●	●	●	●	○	Frameshift	ENSSSCT00000024733	ENSSSCG00000024045	Exon 3	GATSL2
3	16325862	16325862	Deletion	1	○	●	○	●	●	●	●	●	●	●	Frameshift	ENSSSCT00000008478	ENSSSCG00000007733	Exon 13	TYW1B
3	17848216	17848216	Insertion	1	○	○	●	○	○	○	○	○	○	○	Frameshift	ENSSSCT00000008519	ENSSSCG00000007772	Exon 8	STX1B
3	18059307	18059318	Deletion	12	●	○	○	●	○	○	○	○	○	○	Nonframeshift	ENSSSCT00000008527	ENSSSCG00000007780	Exon 1	ZNF629
3	18235947	18235947	Deletion	1	○	○	○	●	●	○	○	○	○	○	Frameshift	ENSSSCT00000025954	ENSSSCG00000024303	Exon 1
3	18511341	18511341	Deletion	1	○	○	○	●	○	○	○	○	○	○	Frameshift	ENSSSCT00000027444	ENSSSCG00000027946	Exon 12	MVP
3	18541101	18541101	Insertion	1	○	○	○	●	○	○	○	○	○	○	Frameshift	ENSSSCT00000027933	ENSSSCG00000027970	Exon 1	PAGR1
3	18541168	18541168	Deletion	1	○	○	○	●	○	○	●	○	○	○	Frameshift	ENSSSCT00000027933	ENSSSCG00000027970	Exon 1	PAGR1
3	19684857	19684857	Insertion	1	○	●	○	○	○	○	●	○	○	○	Frameshift	ENSSSCT00000034082	ENSSSCG00000007816	Exon 7	IL21R
3	19697555	19697555	Insertion	3	○	○	●	●	○	○	○	○	○	○	Nonframeshift	ENSSSCT00000034082	ENSSSCG00000007816	Exon 1	IL21R
3	19848278	19848278	Insertion	1	○	●	○	●	●	●	●	○	○	○	Frameshift	ENSSSCT00000008566	ENSSSCG00000007817	Exon 9	IL4R
3	24035828	24035839	Deletion	12	○	○	○	●	○	○	○	○	○	○	Nonframeshift	ENSSSCT00000008588	ENSSSCG00000007838	Exon 7	OTOA
3	33325764	33325764	Insertion	1	●	●	○	●	●	○	●	○	●	●	Frameshift	ENSSSCT00000032425	ENSSSCG00000020675	Exon 12	ATF7IP2
3	33325883	33325883	Insertion	1	●	●	○	●	●	○	●	○	●	●	Frameshift	ENSSSCT00000032425	ENSSSCG00000020675	Exon 10	ATF7IP2
3	33776444	33776453	Deletion	10	●	○	○	●	●	●	○	○	○	○	Frameshift	ENSSSCT00000008663	ENSSSCG00000007906	Exon 6
3	38330831	38330831	Insertion	1	●	○	●	●	○	●	●	●	●	●	Frameshift	ENSSSCT00000008679	ENSSSCG00000007919	Exon 13	ALG1L2
3	38345628	38345630	Deletion	3	○	○	●	●	●	○	○	○	○	○	Nonframeshift	ENSSSCT00000008679	ENSSSCG00000007919	Exon 1	ALG1L2
3	41358186	41358186	Insertion	1	○	●	●	●	●	●	●	●	●	●	Frameshift	ENSSSCT00000023121	ENSSSCG00000007991	Exon 13	WDR90
3	41364401	41364401	Insertion	1	○	●	●	●	●	●	●	●	●	●	Frameshift	ENSSSCT00000023121	ENSSSCG00000007991	Exon 31	WDR90
3	41377148	41377148	Insertion	1	●	●	●	●	●	●	●	●	●	●	Frameshift	ENSSSCT00000008766	ENSSSCG00000007998	Exon 2	RHBDL1
3	41385210	41385210	Insertion	1	●	●	●	●	●	●	●	●	●	●	Frameshift	ENSSSCT00000008753	ENSSSCG00000007988	Exon 9	JMJD8
3	41823956	41823956	Insertion	1	○	●	●	●	●	●	●	●	○	●	Frameshift	ENSSSCT00000008789	ENSSSCG00000008020	Exon 24	IFT140
3	42403708	42403708	Insertion	1	○	●	●	●	●	●	●	●	●	●	Frameshift	ENSSSCT00000008818	ENSSSCG00000008046	Exon 1	PGP
3	42417954	42417954	Insertion	3	○	○	○	○	○	●	○	○	○	○	Nonframeshift	ENSSSCT00000008819	ENSSSCG00000008047	Exon 12	E4F1
3	43491852	43491852	Deletion	1	●	○	●	●	●	○	○	○	○	○	Frameshift	ENSSSCT00000008843	ENSSSCG00000008070	Exon 6	CENPP
3	44605183	44605183	Insertion	1	○	●	●	●	○	●	●	●	●	●	Frameshift	ENSSSCT00000008854	ENSSSCG00000008081	Exon 3	BARX1
3	45574794	45574796	Deletion	3	○	○	○	●	○	○	○	○	○	○	Nonframeshift	ENSSSCT00000008870	ENSSSCG00000008097	Exon 7	TTL
3	45717519	45717519	Insertion	2	●	○	○	●	●	○	○	○	○	○	Frameshift	ENSSSCT00000008869	ENSSSCG00000008096	Exon 1	ZC3H6
3	46196285	46196285	Insertion	1	○	●	○	●	●	●	●	●	●	●	Frameshift	ENSSSCT00000008877	ENSSSCG00000008103	Exon 7
3	48699065	48699067	Deletion	3	○	○	○	○	●	○	○	○	○	○	Nonframeshift	ENSSSCT00000031771	ENSSSCG00000028944	Exon 7
3	55834633	55834635	Deletion	3	○	○	●	○	○	○	○	○	○	○	Nonframeshift	ENSSSCT00000008946	ENSSSCG00000008169	Exon 18	TBC1D8
3	57776241	57776246	Deletion	6	○	○	○	○	○	●	○	○	○	○	Nonframeshift	ENSSSCT00000008965	ENSSSCG00000008186	Exon 3	TSGA10
3	59007732	59007732	Insertion	1	●	○	●	○	●	●	○	○	●	●	Frameshift	ENSSSCT00000008971	ENSSSCG00000008192	Exon 27	TMEM131
3	61605105	61605107	Deletion	3	●	○	○	●	○	○	○	○	○	○	Nonframeshift	ENSSSCT00000009008	ENSSSCG00000008226	Exon 30	POLR1A
3	63149406	63149406	Insertion	9	○	●	○	○	○	○	○	○	○	○	Nonframeshift	ENSSSCT00000009033	ENSSSCG00000008247	Exon 2	SUCLG1
3	71865827	71865827	Insertion	1	○	●	●	●	●	●	●	●	●	○	Frameshift	ENSSSCT00000009065	ENSSSCG00000008277	Exon 1	PCGF1
3	71969446	71969448	Deletion	3	○	○	●	○	○	○	○	○	○	○	Nonframeshift	ENSSSCT00000024556	ENSSSCG00000027320	Exon 27	SLC4A5
3	72396227	72396227	Insertion	1	○	●	●	●	●	●	●	●	●	○	Frameshift	ENSSSCT00000009090	ENSSSCG00000008299	Exon 5	C2orf78
3	72396669	72396669	Insertion	6	○	○	○	●	○	○	○	○	○	○	Nonframeshift	ENSSSCT00000009090	ENSSSCG00000008299	Exon 4	C2orf78
3	90513591	90513591	Insertion	1	○	○	○	○	○	●	●	●	●	○	Frameshift	ENSSSCT00000009197	ENSSSCG00000008400	Exon 1	CFAP36
3	92069822	92069824	Deletion	3	●	○	○	○	○	○	○	○	○	○	Nonframeshift	ENSSSCT00000023995	ENSSSCG00000022089	Exon 1	GPR115
3	103261085	103261085	Insertion	3	○	●	●	●	○	●	●	●	●	●	Nonframeshift	ENSSSCT00000009263	ENSSSCG00000008461	Exon 2	ZFP36L2
3	109340058	109340058	Insertion	2	○	○	●	○	○	○	○	○	○	○	Frameshift	ENSSSCT00000009293	ENSSSCG00000008491	Exon 6	QPCT
3	114914856	114914856	Insertion	1	●	●	○	●	●	○	●	●	●	○	Frameshift	ENSSSCT00000031281	ENSSSCG00000024781	Exon 22	CAPN14
3	115884792	115884792	Insertion	3	○	○	○	○	●	○	○	○	○	○	Nonframeshift	ENSSSCT00000036212	ENSSSCG00000030917	Exon 1	YWHAE
3	115885218	115885218	Insertion	3	○	○	○	○	○	○	●	○	○	○	Nonframeshift	ENSSSCT00000036212	ENSSSCG00000030917	Exon 2	YWHAE
3	116973571	116973571	Insertion	1	○	●	●	●	●	●	●	●	●	●	Frameshift	ENSSSCT00000009339	ENSSSCG00000008535	Exon 7	CLIP4
3	117038464	117038464	Insertion	1	○	●	●	●	●	●	●	●	●	●	Frameshift	ENSSSCT00000025721	ENSSSCG00000024725	Exon 2	C2orf71
3	117039328	117039328	Insertion	6	○	○	○	○	○	○	●	○	○	○	Nonframeshift	ENSSSCT00000025721	ENSSSCG00000024725	Exon 2	C2orf71
3	117040055	117040055	Deletion	1	○	●	●	●	●	●	●	●	●	●	Frameshift	ENSSSCT00000025721	ENSSSCG00000024725	Exon 3	C2orf71
3	117100127	117100127	Insertion	9	○	○	○	●	○	○	●	●	○	○	Nonframeshift	ENSSSCT00000029339	ENSSSCG00000008534	Exon 2	FAM179A
3	117185506	117185517	Deletion	12	○	●	○	○	○	○	○	○	○	○	Nonframeshift	ENSSSCT00000009340	ENSSSCG00000008536	Exon 6	WDR43
3	118477961	118477963	Deletion	3	○	○	○	○	○	●	○	○	○	○	Nonframeshift	ENSSSCT00000009354	ENSSSCG00000008549	Exon 11	SLC4A1AP
3	119084563	119084563	Insertion	1	○	○	●	●	●	○	●	●	●	●	Frameshift	ENSSSCT00000027657	ENSSSCG00000029185	Exon 5	MAPRE3
3	119995596	119995596	Insertion	1	●	●	○	●	●	○	○	○	○	○	Frameshift	ENSSSCT00000009381	ENSSSCG00000008574	Exon 12	KIF3C
3	120772303	120772308	Deletion	6	○	●	○	○	○	○	○	○	○	○	Nonframeshift	ENSSSCT00000032500	ENSSSCG00000021155	Exon 2	POMC
3	121038327	121038327	Deletion	1	○	●	●	●	●	●	●	●	●	●	Frameshift	ENSSSCT00000009386	ENSSSCG00000008577	Exon 6	DNAJC27
3	121152724	121152724	Insertion	1	○	●	●	○	●	●	●	○	○	●	Frameshift	ENSSSCT00000009387	ENSSSCG00000008578	Exon 3	ADCY3
3	125549402	125549402	Insertion	3	○	○	○	●	○	○	○	○	○	○	Nonframeshift	ENSSSCT00000028882	ENSSSCG00000028931	Exon 2	GDF7
3	128141829	128141840	Deletion	12	○	○	○	●	○	○	●	○	○	○	Nonframeshift	ENSSSCT00000029392	ENSSSCG00000023060	Exon 2
3	128141875	128141875	Insertion	2	○	○	○	●	○	○	●	○	○	○	Frameshift	ENSSSCT00000029392	ENSSSCG00000023060	Exon 1
3	135301518	135301518	Deletion	1	○	○	●	○	○	○	○	○	○	○	Frameshift	ENSSSCT00000009454	ENSSSCG00000008642	Exon 24	ASAP2
3	139835110	139835110	Insertion	1	○	○	●	○	○	○	○	○	○	○	Frameshift	ENSSSCT00000031364	ENSSSCG00000024285	Exon 7	DLG4
3	139851917	139851917	Deletion	1	○	○	●	○	○	○	○	○	○	○	Frameshift	ENSSSCT00000030141	ENSSSCG00000020972	Exon 1	ACADVL
3	140442138	140442138	Insertion	1	○	○	○	○	●	○	○	○	○	○	Frameshift	ENSSSCT00000027102	ENSSSCG00000025305	Exon 8	RP13-512J5.1
3	140564796	140564796	Insertion	3	○	○	○	○	●	○	○	○	○	○	Nonframeshift	ENSSSCT00000028548	ENSSSCG00000024665	Exon 1	TRAPPC12
3	144209143	144209143	Insertion	4	○	○	○	○	○	○	○	○	○	●	Frameshift	ENSSSCT00000030300	ENSSSCG00000028163	Exon 2
3	144213587	144213587	Insertion	4	○	○	●	○	○	●	○	○	○	●	Frameshift	ENSSSCT00000030300	ENSSSCG00000028163	Exon 5
3	144221632	144221634	Deletion	3	○	○	○	●	○	○	○	○	○	○	Nonframeshift	ENSSSCT00000030300	ENSSSCG00000028163	Exon 13
3	144239831	144239831	Insertion	4	○	○	●	○	○	○	○	○	○	○	Stopgain	ENSSSCT00000031682	ENSSSCG00000030445	Exon 6	ZNF12
3	144280313	144280318	Deletion	6	○	○	○	○	●	○	○	○	○	○	Nonframeshift	ENSSSCT00000029822	ENSSSCG00000023378	Exon 5	ZNF316
4	385237	385237	Insertion	1	○	●	●	●	●	●	●	●	●	○	Frameshift	ENSSSCT00000006478	ENSSSCG00000005899	Exon 3	MFSD3
4	581185	581188	Deletion	4	○	○	○	○	○	○	●	○	○	○	Frameshift	ENSSSCT00000006503	ENSSSCG00000005923	Exon 9	SPATC1
4	582250	582250	Insertion	1	○	○	●	●	○	○	●	○	●	○	Frameshift	ENSSSCT00000006503	ENSSSCG00000005923	Exon 3	SPATC1
4	588179	588180	Deletion	2	○	○	●	●	○	○	●	○	●	○	Frameshift	ENSSSCT00000006502	ENSSSCG00000005922	Exon 1
4	1040966	1040966	Insertion	1	○	●	●	●	○	●	○	●	○	○	Frameshift	ENSSSCT00000028155	ENSSSCG00000006954	Exon 1	EEF1D
4	1049524	1049524	Deletion	1	○	●	●	●	●	●	○	●	○	○	Frameshift	ENSSSCT00000007613	ENSSSCG00000006948	Exon 6	MROH6
4	3908271	3908271	Deletion	1	○	○	○	●	●	○	○	○	○	○	Frameshift	ENSSSCT00000023822	ENSSSCG00000005938	Exon 18
4	3908293	3908293	Insertion	1	○	●	○	○	○	○	○	○	○	○	Frameshift	ENSSSCT00000023822	ENSSSCG00000005938	Exon 18
4	3909907	3909907	Insertion	1	○	○	○	○	○	○	●	●	○	○	Frameshift	ENSSSCT00000023822	ENSSSCG00000005938	Exon 19
4	4325242	4325242	Insertion	3	○	●	●	○	○	○	●	●	○	○	Nonframeshift	ENSSSCT00000006522	ENSSSCG00000005939	Exon 12	FAM135B
4	8299970	8299970	Insertion	3	○	○	○	○	●	○	○	○	○	○	Nonframeshift	ENSSSCT00000006531	ENSSSCG00000005948	Exon 22	TG
4	8461750	8461750	Insertion	1	●	●	●	●	●	●	●	○	●	●	Frameshift	ENSSSCT00000006533	ENSSSCG00000005950	Exon 13	PHF20L1
4	8532126	8532126	Insertion	1	●	○	○	○	○	○	○	○	○	○	Frameshift	ENSSSCT00000006534	ENSSSCG00000005951	Exon 1	TMEM71
4	15157702	15157708	Deletion	7	○	●	●	○	●	○	○	○	○	○	Frameshift	ENSSSCT00000006552	ENSSSCG00000005969	Exon 11
4	15295884	15295884	Deletion	1	●	○	○	○	○	○	○	○	○	○	Frameshift	ENSSSCT00000006554	ENSSSCG00000005971	Exon 3	ZNF572
4	16667042	16667042	Deletion	1	●	○	●	●	●	●	●	●	●	●	Frameshift	ENSSSCT00000006564	ENSSSCG00000005981	Exon 7	FBXO32
4	16914454	16914454	Insertion	3	○	○	○	○	○	○	○	○	●	○	Nonframeshift	ENSSSCT00000006569	ENSSSCG00000005986	Exon 4	FAM83A
4	16999415	16999415	Insertion	1	○	○	○	○	○	○	○	●	○	○	Frameshift	ENSSSCT00000006570	ENSSSCG00000005987	Exon 2	TBC1D31
4	21861174	21861174	Insertion	1	●	○	●	○	●	○	○	○	○	●	Frameshift	ENSSSCT00000006592	ENSSSCG00000006008	Exon 3
4	21861362	21861362	Insertion	6	○	○	○	○	●	○	○	○	○	○	Stopgain	ENSSSCT00000006592	ENSSSCG00000006008	Exon 3
4	30819714	30819714	Insertion	2	○	●	○	●	○	○	○	○	○	○	Frameshift	ENSSSCT00000006619	ENSSSCG00000006030	Exon 1	TRHR
4	35676727	35676727	Insertion	1	○	●	●	●	●	●	●	●	●	●	Frameshift	ENSSSCT00000006632	ENSSSCG00000006043	Exon 2	DCSTAMP
4	36497374	36497374	Insertion	1	●	○	●	●	○	○	○	○	○	○	Frameshift	ENSSSCT00000006638	ENSSSCG00000006049	Exon 7	SLC25A32
4	36582068	36582068	Insertion	1	●	●	○	●	○	●	●	●	○	○	Frameshift	ENSSSCT00000006640	ENSSSCG00000006051	Exon 3	CTHRC1
4	39674603	39674607	Deletion	5	○	○	●	○	○	○	○	○	○	○	Frameshift	ENSSSCT00000006658	ENSSSCG00000006067	Exon 6	SPAG1
4	40596591	40596591	Insertion	1	○	○	○	○	○	○	○	○	●	○	Frameshift	ENSSSCT00000030508	ENSSSCG00000024980	Exon 2
4	51504795	51504795	Insertion	1	●	○	○	●	●	●	●	●	○	●	Frameshift	ENSSSCT00000026840	ENSSSCG00000024096	Exon 1	RIPK2
4	56757078	56757078	Deletion	1	○	○	○	○	○	○	○	●	○	○	Frameshift	ENSSSCT00000006741	ENSSSCG00000006148	Exon 1
4	64875012	64875012	Insertion	1	●	●	●	●	○	●	●	○	●	●	Frameshift	ENSSSCT00000006763	ENSSSCG00000006169	Exon 11	ZFHX4
4	67671463	67671463	Deletion	1	○	●	○	○	●	●	●	○	●	○	Frameshift	ENSSSCT00000024679	ENSSSCG00000021628	Exon 1	TMEM70
4	73467833	73467842	Deletion	10	○	○	○	○	○	○	○	●	○	○	Nonframeshift	ENSSSCT00000034412	ENSSSCG00000006200	Exon 11	CPA6
4	75030466	75030466	Insertion	1	●	●	●	●	●	○	●	●	○	●	Frameshift	ENSSSCT00000006814	ENSSSCG00000006218	Exon 1	PDE7A
4	75145835	75145835	Insertion	1	○	●	●	●	●	○	●	○	○	●	Frameshift	ENSSSCT00000006816	ENSSSCG00000006220	Exon 1	ARMC1
4	78502740	78502740	Insertion	4	○	●	○	●	●	○	○	○	○	○	Frameshift	ENSSSCT00000028806	ENSSSCG00000025087	Exon 8	ASPH
4	79032393	79032393	Deletion	1	○	●	●	●	○	○	●	○	●	○	Frameshift	ENSSSCT00000006828	ENSSSCG00000006231	Exon 38	CHD7
4	79060640	79060640	Insertion	1	○	●	●	●	●	○	●	●	●	●	Frameshift	ENSSSCT00000006828	ENSSSCG00000006231	Exon 16	CHD7
4	88844892	88844892	Insertion	1	●	●	●	●	●	●	○	○	●	●	Frameshift	ENSSSCT00000006885	ENSSSCG00000006285	Exon 2	METTL18
4	89018330	89018335	Deletion	6	●	●	○	●	●	○	○	○	●	○	Nonframeshift	ENSSSCT00000006891	ENSSSCG00000006288	Exon 9	SELP
4	90576807	90576807	Insertion	1	○	●	●	○	●	○	●	●	○	○	Frameshift	ENSSSCT00000006907	ENSSSCG00000006302	Exon 5	GPR161
4	90660639	90660639	Insertion	1	○	○	○	○	○	○	●	●	○	○	Frameshift	ENSSSCT00000030043	ENSSSCG00000020979	Exon 3	DCAF6
4	97124804	97124804	Insertion	1	●	○	○	○	○	○	○	●	●	●	Frameshift	ENSSSCT00000006968	ENSSSCG00000006359	Exon 9	ADAMTS4
4	97945783	97945783	Insertion	2	○	●	●	●	●	●	○	○	●	●	Frameshift	ENSSSCT00000006996	ENSSSCG00000006383	Exon 8	VANGL2
4	97945861	97945861	Insertion	1	○	●	●	●	●	●	○	●	●	●	Frameshift	ENSSSCT00000006996	ENSSSCG00000006383	Exon 8	VANGL2
4	98014376	98014378	Deletion	3	○	○	○	○	○	○	○	○	○	●	Nonframeshift	ENSSSCT00000006998	ENSSSCG00000006385	Exon 13	NCSTN
4	98754886	98754887	Deletion	2	○	●	●	○	○	○	○	○	●	○	Frameshift	ENSSSCT00000029314	ENSSSCG00000021186	Exon 2	CRP
4	99104375	99104375	Insertion	1	○	●	○	○	○	○	○	○	○	○	Frameshift	ENSSSCT00000025653	ENSSSCG00000024008	Exon 1	OR10J1
4	102127429	102127429	Insertion	2	○	○	○	●	○	○	○	○	○	○	Frameshift	ENSSSCT00000007095	ENSSSCG00000006478	Exon 2	HAPLN2
4	102127432	102127432	Insertion	3	○	○	●	○	○	○	○	○	○	○	Nonframeshift	ENSSSCT00000007095	ENSSSCG00000006478	Exon 2	HAPLN2
4	102477688	102477688	Insertion	1	○	●	●	●	●	○	●	●	●	●	Frameshift	ENSSSCT00000007109	ENSSSCG00000006490	Exon 4	SMG5
4	102697943	102697943	Insertion	3	○	●	●	○	○	○	○	○	●	○	Nonframeshift	ENSSSCT00000007116	ENSSSCG00000006497	Exon 2	MEX3A
4	103354407	103354407	Deletion	1	●	●	●	○	●	○	●	●	●	●	Frameshift	ENSSSCT00000007140	ENSSSCG00000006520	Exon 4	SCAMP3
4	103363131	103363131	Insertion	1	○	○	○	○	○	○	○	○	●	●	Frameshift	ENSSSCT00000007141	ENSSSCG00000006521	Exon 14	FAM189B
4	103417597	103417597	Insertion	1	○	●	●	○	●	○	●	●	●	●	Frameshift	ENSSSCT00000007147	ENSSSCG00000006526	Exon 10	TRIM46
4	104104576	104104583	Deletion	8	○	●	●	○	●	○	●	●	●	●	Frameshift	ENSSSCT00000007171	ENSSSCG00000006546	Exon 1	TDRD10
4	104803829	104803829	Deletion	1	●	●	●	○	●	○	●	●	●	●	Frameshift	ENSSSCT00000007199	ENSSSCG00000006571	Exon 31	INTS3
4	104860403	104860403	Deletion	1	○	●	●	○	●	○	●	●	●	●	Frameshift	ENSSSCT00000007200	ENSSSCG00000006572	Exon 18	NPR1
4	105687177	105687177	Insertion	1	○	○	○	○	○	●	●	●	○	●	Frameshift	ENSSSCT00000007230	ENSSSCG00000006598	Exon 2	KPRP
4	109044154	109044154	Insertion	1	●	●	●	●	●	●	●	○	●	○	Frameshift	ENSSSCT00000023324	ENSSSCG00000026502	Exon 6	LIX1L
4	109119036	109119036	Insertion	3	○	○	○	○	○	●	○	○	○	○	Nonframeshift	ENSSSCT00000007329	ENSSSCG00000006690	Exon 4	NUDT17
4	109294203	109294203	Deletion	1	●	○	○	●	○	●	○	○	○	○	Frameshift	ENSSSCT00000007332	ENSSSCG00000006693	Exon 5	PDZK1
4	115867304	115867304	Insertion	1	●	●	○	●	●	●	●	●	●	○	Frameshift	ENSSSCT00000007395	ENSSSCG00000006750	Exon 3	SYCP1
4	117508774	117508774	Deletion	1	●	●	●	●	●	●	●	○	●	○	Frameshift	ENSSSCT00000007414	ENSSSCG00000006768	Exon 3
4	117613135	117613135	Deletion	1	○	○	○	●	●	●	●	○	●	○	Frameshift	ENSSSCT00000007415	ENSSSCG00000006769	Exon 3	SLC16A1
4	117723470	117723471	Deletion	2	○	○	○	○	●	○	○	○	○	○	Frameshift	ENSSSCT00000007418	ENSSSCG00000006772	Exon 1	CCDC23
4	120878542	120878553	Deletion	12	○	○	○	●	○	○	○	○	○	○	Nonframeshift	ENSSSCT00000023286	ENSSSCG00000029405	Exon 4	LDHB
4	120878590	120878590	Deletion	1	○	○	○	●	○	○	○	○	○	○	Frameshift	ENSSSCT00000023286	ENSSSCG00000029405	Exon 4	LDHB
4	121308445	121308445	Deletion	1	○	○	●	○	○	○	●	○	○	●	Frameshift	ENSSSCT00000007485	ENSSSCG00000006834	Exon 4	MYBPHL
4	121722653	121722653	Deletion	1	○	●	○	●	○	○	○	○	○	○	Frameshift	ENSSSCT00000025132	ENSSSCG00000006842	Exon 14	RP11-475E11.9
4	128056357	128056357	Deletion	1	○	○	○	○	●	○	○	○	○	●	Stopgain	ENSSSCT00000028784	ENSSSCG00000025978	Exon 2	OOEP
4	129252616	129252618	Deletion	3	○	○	○	○	●	○	○	○	○	○	Nonframeshift	ENSSSCT00000007517	ENSSSCG00000006864	Exon 12	CDC14A
4	129783134	129783134	Insertion	1	●	○	○	○	●	●	●	●	●	○	Frameshift	ENSSSCT00000007525	ENSSSCG00000006872	Exon 24	AGL
4	139299531	139299531	Insertion	1	○	●	●	●	●	●	●	●	○	●	Frameshift	ENSSSCT00000035464	ENSSSCG00000030801	Exon 10	GBP6
4	139462266	139462266	Insertion	1	●	○	○	○	●	○	○	○	○	●	Frameshift	ENSSSCT00000007577	ENSSSCG00000022397	Exon 4	GBP6
4	142268781	142268783	Deletion	3	○	○	○	○	○	○	○	○	○	●	Nonframeshift	ENSSSCT00000007600	ENSSSCG00000006936	Exon 15	ODF2L
4	142268785	142268785	Insertion	3	○	●	●	○	●	○	○	●	●	○	Nonframeshift	ENSSSCT00000007600	ENSSSCG00000006936	Exon 15	ODF2L
5	1491569	1491569	Deletion	1	○	●	○	○	○	●	○	○	○	○	Frameshift	ENSSSCT00000000019	ENSSSCG00000000018	Exon 1	KIAA0930
5	2582006	2582006	Insertion	1	○	○	○	○	○	○	○	○	○	●	Frameshift	ENSSSCT00000000029	ENSSSCG00000000028	Exon 2	EFCAB6
5	2723322	2723322	Insertion	1	○	●	○	●	○	●	●	●	●	●	Frameshift	ENSSSCT00000000029	ENSSSCG00000000028	Exon 20	EFCAB6
5	3124313	3124324	Deletion	12	○	○	○	○	○	●	○	○	○	●	Nonframeshift	ENSSSCT00000000036	ENSSSCG00000000034	Exon 1	TTLL12
5	4855090	4855090	Deletion	1	○	●	●	●	●	○	○	●	○	●	Frameshift	ENSSSCT00000000079	ENSSSCG00000000073	Exon 1
5	4855154	4855168	Deletion	15	○	○	●	○	○	○	○	●	○	●	Nonframeshift	ENSSSCT00000000079	ENSSSCG00000000073	Exon 1
5	5213062	5213062	Insertion	1	○	●	●	●	●	○	●	●	●	●	Frameshift	ENSSSCT00000000082	ENSSSCG00000000076	Exon 8	SGSM3
5	5356369	5356369	Insertion	1	○	○	●	○	○	○	○	○	○	○	Frameshift	ENSSSCT00000000084	ENSSSCG00000000078	Exon 23	TNRC6B
5	5374984	5374986	Deletion	3	●	○	○	○	○	○	○	○	○	○	Nonframeshift	ENSSSCT00000000084	ENSSSCG00000000078	Exon 16	TNRC6B
5	5647463	5647463	Insertion	6	○	○	●	○	●	○	○	○	○	○	Nonframeshift	ENSSSCT00000000085	ENSSSCG00000000079	Exon 1	FAM83F
5	5804423	5804423	Insertion	3	○	●	○	○	○	○	○	○	○	○	Nonframeshift	ENSSSCT00000000087	ENSSSCG00000000081	Exon 4	ENTHD1
5	5934676	5934676	Deletion	1	○	●	●	●	●	○	○	○	●	●	Frameshift	ENSSSCT00000000088	ENSSSCG00000000082	Exon 9	CACNA1I
5	5934928	5934928	Insertion	4	○	○	●	○	○	○	○	○	○	○	Frameshift	ENSSSCT00000000088	ENSSSCG00000000082	Exon 9	CACNA1I
5	5935285	5935285	Insertion	6	○	○	●	○	○	○	○	○	○	○	Nonframeshift	ENSSSCT00000000088	ENSSSCG00000000082	Exon 8	CACNA1I
5	6080631	6080631	Deletion	1	○	●	●	●	●	○	○	○	●	●	Frameshift	ENSSSCT00000000092	ENSSSCG00000000086	Exon 1	MGAT3
5	6471036	6471036	Insertion	1	○	●	●	●	●	○	●	●	●	●	Frameshift	ENSSSCT00000000098	ENSSSCG00000000092	Exon 5	NPTXR
5	7609840	7609840	Insertion	3	○	○	●	○	○	○	○	○	○	○	Nonframeshift	ENSSSCT00000024579	ENSSSCG00000020777	Exon 6	TRIOBP
5	8607460	8607460	Insertion	1	○	●	○	●	○	○	○	○	○	○	Frameshift	ENSSSCT00000000145	ENSSSCG00000000139	Exon 5	IFT27
5	14030358	14030358	Insertion	1	○	●	●	○	●	○	●	○	●	●	Frameshift	ENSSSCT00000000178	ENSSSCG00000000169	Exon 1
5	14098731	14098731	Deletion	1	○	○	●	○	○	○	○	○	●	●	Frameshift	ENSSSCT00000000180	ENSSSCG00000000171	Exon 2	CKAP4
5	15178090	15178090	Insertion	1	○	●	●	○	●	●	○	●	●	●	Frameshift	ENSSSCT00000000185	ENSSSCG00000000176	Exon 5	CACNB3
5	15178145	15178145	Insertion	1	○	●	●	○	●	●	○	●	●	●	Frameshift	ENSSSCT00000000185	ENSSSCG00000000176	Exon 5	CACNB3
5	16489727	16489727	Deletion	1	○	●	○	○	●	●	●	●	●	●	Frameshift	ENSSSCT00000024008	ENSSSCG00000022766	Exon 3	LIMA1
5	17742708	17742708	Deletion	1	●	●	●	○	●	●	○	○	○	○	Frameshift	ENSSSCT00000000245	ENSSSCG00000000228	Exon 21	SCN8A
5	18107659	18107659	Insertion	1	○	●	○	○	○	○	○	○	○	○	Frameshift	ENSSSCT00000030416	ENSSSCG00000022657	Exon 1	KRT81
5	18145524	18145524	Insertion	1	○	○	○	○	○	○	○	○	●	○	Frameshift	ENSSSCT00000029831	ENSSSCG00000025597	Exon 2
5	18506825	18506825	Insertion	3	○	○	○	●	○	○	○	○	○	○	Nonframeshift	ENSSSCT00000000270	ENSSSCG00000000251	Exon 9	KRT1
5	18506915	18506917	Deletion	3	○	○	○	●	●	○	●	○	○	○	Nonframeshift	ENSSSCT00000000270	ENSSSCG00000000251	Exon 9	KRT1
5	18522504	18522509	Deletion	6	○	○	○	●	●	○	○	○	○	○	Nonframeshift	ENSSSCT00000032389	ENSSSCG00000024092	Exon 10	KRT77
5	18824780	18824780	Insertion	1	○	○	●	●	●	○	●	○	●	○	Frameshift	ENSSSCT00000000275	ENSSSCG00000000256	Exon 4	ZNF740
5	20849791	20849791	Deletion	1	○	○	○	●	○	●	○	○	○	○	Frameshift	ENSSSCT00000000320	ENSSSCG00000000299	Exon 11	TESPA1
5	21258106	21258109	Deletion	4	○	○	○	●	○	○	○	○	○	○	Frameshift	ENSSSCT00000022877	ENSSSCG00000026447	Exon 2	OR6C6
5	21963486	21963486	Insertion	2	○	○	○	●	○	○	○	○	○	○	Frameshift	ENSSSCT00000000354	ENSSSCG00000000332	Exon 1	OR6C1
5	23285165	23285165	Insertion	1	●	○	○	○	●	○	●	○	●	●	Frameshift	ENSSSCT00000000428	ENSSSCG00000000396	Exon 18	STAT2
5	23295741	23295741	Deletion	1	●	○	○	○	●	●	●	○	●	●	Frameshift	ENSSSCT00000000429	ENSSSCG00000000397	Exon 3	APOF
5	23619421	23619421	Insertion	3	○	○	○	○	○	○	○	●	●	○	Nonframeshift	ENSSSCT00000000436	ENSSSCG00000000403	Exon 12	BAZ2A
5	24136234	24136240	Deletion	7	○	○	○	○	○	○	○	○	●	○	Frameshift	ENSSSCT00000028141	ENSSSCG00000024919	Exon 2	RDH16
5	24336711	24336711	Deletion	1	○	●	●	●	○	●	○	●	●	●	Frameshift	ENSSSCT00000000457	ENSSSCG00000000423	Exon 9
5	24757273	24757273	Insertion	1	○	○	●	●	○	○	●	●	○	●	Frameshift	ENSSSCT00000000465	ENSSSCG00000000431	Exon 4	MBD6
5	34084911	34084911	Insertion	1	○	○	●	●	●	●	●	●	●	●	Frameshift	ENSSSCT00000000516	ENSSSCG00000000478	Exon 11	GRIP1
5	36618447	36618447	Insertion	1	○	○	●	●	○	●	●	●	●	○	Frameshift	ENSSSCT00000000539	ENSSSCG00000000500	Exon 3	RAB3IP
5	36618486	36618486	Insertion	1	○	○	●	●	○	●	●	●	●	○	Frameshift	ENSSSCT00000000539	ENSSSCG00000000500	Exon 4	RAB3IP
5	44582012	44582012	Insertion	1	○	●	●	●	●	○	○	●	●	●	Frameshift	ENSSSCT00000000570	ENSSSCG00000000528	Exon 4	PKP2
5	45556647	45556647	Insertion	3	○	●	○	○	○	○	○	○	○	○	Nonframeshift	ENSSSCT00000032100	ENSSSCG00000030616	Exon 1	KIAA1551
5	47366069	47366069	Insertion	1	●	●	●	○	●	○	○	●	●	●	Frameshift	ENSSSCT00000024051	ENSSSCG00000027447	Exon 6	TMTC1
5	47566178	47566180	Deletion	3	○	○	○	○	●	○	○	○	○	○	Nonframeshift	ENSSSCT00000000582	ENSSSCG00000000540	Exon 14	OVCH1
5	49802593	49802593	Insertion	1	●	○	○	○	○	○	○	○	○	●	Frameshift	ENSSSCT00000029305	ENSSSCG00000000550	Exon 8	SMCO2
5	52560002	52560009	Deletion	8	○	○	○	○	○	○	○	○	●	○	Frameshift	ENSSSCT00000026706	ENSSSCG00000029163	Exon 8	BCAT1
5	55326737	55326737	Insertion	3	●	○	○	●	●	○	○	○	○	○	Nonframeshift	ENSSSCT00000000626	ENSSSCG00000000582	Exon 1	IAPP
5	56986475	56986475	Insertion	1	○	●	○	●	●	●	●	●	●	●	Frameshift	ENSSSCT00000000632	ENSSSCG00000000587	Exon 1	AEBP2
5	65375432	65375432	Deletion	1	○	●	○	●	●	○	○	○	●	○	Frameshift	ENSSSCT00000031706	ENSSSCG00000000661	Exon 14	PHC1
5	66016673	66016673	Deletion	1	○	○	○	●	○	●	○	○	○	○	Frameshift	ENSSSCT00000028566	ENSSSCG00000026009	Exon 16	CD163L1
5	66791877	66791877	Insertion	1	○	●	●	○	●	○	●	○	●	●	Frameshift	ENSSSCT00000000771	ENSSSCG00000000708	Exon 10	TNFRSF1A
5	66792137	66792145	Deletion	9	○	○	●	○	○	○	○	○	○	○	Nonframeshift	ENSSSCT00000000771	ENSSSCG00000000708	Exon 12	TNFRSF1A
5	67864712	67864712	Insertion	1	○	○	○	○	○	○	●	○	○	○	Frameshift	ENSSSCT00000000780	ENSSSCG00000000717	Exon 1	KCNA6
5	69789156	69789156	Insertion	12	○	○	●	○	○	○	○	○	○	○	Nonframeshift	ENSSSCT00000000812	ENSSSCG00000000748	Exon 3	IQSEC3
5	72008645	72008645	Deletion	1	○	●	●	○	○	○	●	●	●	●	Frameshift	ENSSSCT00000000830	ENSSSCG00000000766	Exon 9	CECR2
5	72008737	72008737	Deletion	1	○	●	●	○	○	○	●	●	●	●	Frameshift	ENSSSCT00000000830	ENSSSCG00000000766	Exon 10	CECR2
5	72233574	72233574	Insertion	1	○	●	●	○	○	○	●	●	●	●	Frameshift	ENSSSCT00000000834	ENSSSCG00000000770	Exon 13	MICAL3
5	73831579	73831579	Insertion	3	○	○	○	○	●	○	○	○	○	○	Nonframeshift	ENSSSCT00000000846	ENSSSCG00000000782	Exon 12	C12orf40
5	77431962	77431962	Insertion	1	●	●	●	●	●	○	○	●	○	○	Frameshift	ENSSSCT00000000862	ENSSSCG00000000795	Exon 16	ADAMTS20
5	77432930	77432930	Insertion	1	●	○	○	○	○	○	○	○	○	○	Frameshift	ENSSSCT00000000862	ENSSSCG00000000795	Exon 11	ADAMTS20
5	77433506	77433506	Deletion	1	○	●	●	●	●	○	○	○	○	○	Frameshift	ENSSSCT00000000862	ENSSSCG00000000795	Exon 7	ADAMTS20
5	80769534	80769534	Deletion	1	○	○	○	○	○	○	●	○	○	○	Frameshift	ENSSSCT00000000881	ENSSSCG00000000812	Exon 1	C18orf21
5	80769553	80769565	Deletion	13	○	●	●	●	●	○	●	●	●	●	Nonframeshift	ENSSSCT00000000881	ENSSSCG00000000812	Exon 2	C18orf21
5	80769746	80769746	Deletion	1	○	○	○	○	○	○	○	●	○	○	Frameshift	ENSSSCT00000000881	ENSSSCG00000000812	Exon 2	C18orf21
5	80769970	80769970	Insertion	3	○	○	●	○	○	○	○	○	○	●	Nonframeshift	ENSSSCT00000000881	ENSSSCG00000000812	Exon 2	C18orf21
5	81935506	81935506	Deletion	1	○	○	○	●	○	○	○	○	○	○	Frameshift	ENSSSCT00000000898	ENSSSCG00000021948	Exon 1
5	82351968	82351968	Insertion	1	○	○	○	○	○	○	○	○	○	●	Frameshift	ENSSSCT00000027069	ENSSSCG00000025375	Exon 1
5	82963080	82963080	Insertion	1	○	○	○	○	○	○	○	●	●	○	Frameshift	ENSSSCT00000028485	ENSSSCG00000027792	Exon 4	C12orf45
5	84038031	84038031	Insertion	1	○	●	●	●	●	●	●	○	●	●	Frameshift	ENSSSCT00000000925	ENSSSCG00000000848	Exon 5	GLT8D2
5	84060021	84060021	Insertion	6	○	●	●	●	○	○	●	○	●	○	Nonframeshift	ENSSSCT00000000924	ENSSSCG00000000847	Exon 2	TDG
5	86166640	86166640	Deletion	1	●	○	○	○	○	○	○	○	○	○	Frameshift	ENSSSCT00000029179	ENSSSCG00000026250	Exon 1	CCDC53
5	86385680	86385684	Deletion	5	○	○	●	○	○	○	○	○	○	○	Frameshift	ENSSSCT00000028915	ENSSSCG00000000862	Exon 9	GNPTAB
5	87869120	87869120	Insertion	1	●	○	○	○	○	●	●	○	●	●	Frameshift	ENSSSCT00000030549	ENSSSCG00000000874	Exon 8	GAS2L3
5	88077054	88077056	Deletion	3	●	○	○	○	○	○	○	○	○	○	Nonframeshift	ENSSSCT00000000961	ENSSSCG00000000878	Exon 7	DEPDC4
5	88077817	88077817	Insertion	2	●	●	○	○	○	○	○	○	○	○	Frameshift	ENSSSCT00000000961	ENSSSCG00000000878	Exon 9	DEPDC4
5	108391443	108391443	Insertion	1	○	○	●	○	○	○	○	○	●	○	Frameshift	ENSSSCT00000001042	ENSSSCG00000000953	Exon 9	NAV3
5	108391475	108391475	Insertion	1	○	○	●	○	●	○	○	●	●	●	Frameshift	ENSSSCT00000001042	ENSSSCG00000000953	Exon 9	NAV3
5	110501913	110501913	Insertion	1	○	○	○	○	○	○	●	○	○	○	Frameshift	ENSSSCT00000027885	ENSSSCG00000026148	Exon 1
5	110501933	110501933	Insertion	1	○	○	○	○	○	○	●	○	○	○	Frameshift	ENSSSCT00000027885	ENSSSCG00000026148	Exon 1
6	353976	353976	Deletion	1	○	●	○	●	●	○	●	○	●	○	Frameshift	ENSSSCT00000002924	ENSSSCG00000002635	Exon 3	SPIRE2
6	1086378	1086378	Deletion	1	○	○	○	●	●	○	●	○	○	○	Frameshift	ENSSSCT00000002942	ENSSSCG00000002651	Exon 2	CDT1
6	1759823	1759828	Deletion	6	●	○	○	○	○	○	○	○	○	○	Nonframeshift	ENSSSCT00000002943	ENSSSCG00000002652	Exon 6	KLHDC4
6	2067188	2067188	Insertion	1	○	●	●	○	●	○	●	○	●	●	Frameshift	ENSSSCT00000002945	ENSSSCG00000002654	Exon 6	FBXO31
6	2099460	2099460	Insertion	6	○	●	●	○	○	○	○	○	○	○	Stopgain	ENSSSCT00000002948	ENSSSCG00000002657	Exon 6	C16orf95
6	3560594	3560594	Deletion	1	○	●	●	●	●	○	○	○	●	●	Frameshift	ENSSSCT00000027946	ENSSSCG00000002664	Exon 13	GSE1
6	4177626	4177626	Insertion	3	○	○	○	○	○	●	○	○	○	○	Nonframeshift	ENSSSCT00000002957	ENSSSCG00000002666	Exon 1	KIAA0513
6	11872284	11872284	Insertion	3	○	●	○	○	○	○	○	○	○	○	Nonframeshift	ENSSSCT00000002996	ENSSSCG00000002702	Exon 2	DUX4
6	12241704	12241704	Insertion	1	○	●	●	●	○	●	●	○	●	●	Frameshift	ENSSSCT00000022592	ENSSSCG00000028878	Exon 4	BCAR1
6	12241789	12241789	Insertion	1	○	●	●	●	○	●	●	○	●	●	Frameshift	ENSSSCT00000022592	ENSSSCG00000028878	Exon 6	BCAR1
6	12672720	12672720	Insertion	1	○	○	○	●	○	○	●	○	○	●	Frameshift	ENSSSCT00000003008	ENSSSCG00000002714	Exon 1	WDR59
6	13364929	13364933	Deletion	5	●	○	○	○	○	○	○	○	○	○	Frameshift	ENSSSCT00000003017	ENSSSCG00000002723	Exon 16	AARS
6	13364973	13364973	Insertion	1	○	○	●	●	○	○	○	○	●	○	Frameshift	ENSSSCT00000003017	ENSSSCG00000002723	Exon 16	AARS
6	15070278	15070278	Insertion	3	○	○	●	○	○	○	○	○	○	○	Nonframeshift	ENSSSCT00000003049	ENSSSCG00000002752	Exon 6	ZFHX3
6	15070279	15070281	Deletion	3	○	○	○	○	○	○	●	○	○	○	Nonframeshift	ENSSSCT00000003049	ENSSSCG00000002752	Exon 6	ZFHX3
6	15070279	15070290	Deletion	12	○	●	○	●	○	○	○	○	○	○	Nonframeshift	ENSSSCT00000003049	ENSSSCG00000002752	Exon 6	ZFHX3
6	17313063	17313063	Insertion	3	○	○	○	○	●	○	○	○	○	○	Nonframeshift	ENSSSCT00000023148	ENSSSCG00000024759	Exon 3	CX3CL1
6	17750680	17750680	Insertion	1	○	●	●	○	●	●	●	●	●	●	Frameshift	ENSSSCT00000003112	ENSSSCG00000002812	Exon 2	KIFC3
6	17775087	17775087	Insertion	1	○	○	○	○	○	●	○	●	○	○	Frameshift	ENSSSCT00000003109	ENSSSCG00000002809	Exon 4	TEPP
6	25681749	25681749	Insertion	3	●	○	●	●	●	○	●	●	●	○	Stopgain	ENSSSCT00000003066	ENSSSCG00000002768	Exon 11	CENPT
6	27548176	27548176	Deletion	1	●	●	○	○	○	●	●	○	●	●	Frameshift	ENSSSCT00000003130	ENSSSCG00000002829	Exon 6	MMP2
6	27553832	27553832	Insertion	1	○	●	○	○	○	●	○	○	●	●	Frameshift	ENSSSCT00000003130	ENSSSCG00000002829	Exon 1	MMP2
6	27668378	27668383	Deletion	6	○	○	○	○	○	●	●	○	●	●	Nonframeshift	ENSSSCT00000003131	ENSSSCG00000002830	Exon 6	IRX6
6	30233335	30233349	Deletion	15	○	○	○	○	○	○	○	○	○	●	Nonframeshift	ENSSSCT00000003137	ENSSSCG00000002836	Exon 2	SALL1
6	36788586	36788586	Deletion	1	○	●	●	●	●	●	○	●	●	●	Frameshift	ENSSSCT00000028743	ENSSSCG00000025214	Exon 2	TSHZ3
6	36791131	36791131	Insertion	1	○	○	○	●	○	○	○	○	○	○	Frameshift	ENSSSCT00000028743	ENSSSCG00000025214	Exon 1	TSHZ3
6	38728163	38728163	Insertion	1	○	●	●	○	●	●	●	●	●	○	Frameshift	ENSSSCT00000003169	ENSSSCG00000002868	Exon 4
6	39784833	39784833	Insertion	1	○	●	○	●	○	●	●	○	○	○	Frameshift	ENSSSCT00000003179	ENSSSCG00000002877	Exon 4	ZNF181
6	40602580	40602585	Deletion	6	○	○	○	○	○	○	●	○	○	○	Nonframeshift	ENSSSCT00000003199	ENSSSCG00000002895	Exon 1	KMT2B
6	40785416	40785416	Insertion	1	○	●	○	●	○	●	●	●	○	○	Frameshift	ENSSSCT00000003235	ENSSSCG00000002929	Exon 5	SYNE4
6	40785444	40785444	Insertion	1	○	●	○	●	○	●	●	●	○	○	Frameshift	ENSSSCT00000003235	ENSSSCG00000002929	Exon 4	SYNE4
6	42095541	42095541	Deletion	1	○	●	○	○	○	○	○	○	○	○	Frameshift	ENSSSCT00000003253	ENSSSCG00000030256	Exon 3	ZNF790
6	42799446	42799451	Deletion	6	○	○	●	○	○	○	○	○	○	○	Nonframeshift	ENSSSCT00000003280	ENSSSCG00000002957	Exon 1	GGN
6	43211629	43211634	Deletion	6	○	○	○	○	●	○	○	○	○	○	Nonframeshift	ENSSSCT00000029191	ENSSSCG00000022692	Exon 7	RINL
6	43283407	43283407	Insertion	1	○	●	○	●	●	●	●	●	●	○	Frameshift	ENSSSCT00000027844	ENSSSCG00000026261	Exon 2	FBXO17
6	43833195	43833195	Insertion	1	○	●	○	○	○	○	○	○	○	○	Frameshift	ENSSSCT00000028028	ENSSSCG00000026612	Exon 1	TIMM50
6	44448213	44448213	Insertion	3	○	○	●	○	○	○	○	○	○	○	Nonframeshift	ENSSSCT00000028688	ENSSSCG00000026931	Exon 1	SERTAD1
6	46844378	46844378	Insertion	3	○	○	○	○	○	○	○	○	○	●	Nonframeshift	ENSSSCT00000030226	ENSSSCG00000026699	Exon 5	ZNF180
6	47300117	47300117	Deletion	1	○	●	○	○	○	○	○	○	●	●	Frameshift	ENSSSCT00000003423	ENSSSCG00000003085	Exon 3	CLPTM1
6	47607598	47607598	Insertion	1	○	●	●	○	●	●	○	●	●	●	Frameshift	ENSSSCT00000003440	ENSSSCG00000003101	Exon 1	HIF3A
6	47637126	47637126	Insertion	1	○	●	●	○	●	○	○	●	●	●	Frameshift	ENSSSCT00000003437	ENSSSCG00000003098	Exon 1	PPP5C
6	47883970	47883970	Insertion	1	○	○	○	○	○	●	○	○	○	●	Frameshift	ENSSSCT00000032286	ENSSSCG00000026152	Exon 16	PRKD2
6	48272033	48272034	Deletion	2	○	●	●	○	●	●	○	●	●	●	Frameshift	ENSSSCT00000024307	ENSSSCG00000022958	Exon 4	ZC3H4
6	48450345	48450345	Insertion	6	○	○	○	○	●	○	○	○	●	○	Nonframeshift	ENSSSCT00000026006	ENSSSCG00000024240	Exon 11	CCDC9
6	48584246	48584246	Insertion	3	○	○	○	○	○	●	○	○	○	●	Nonframeshift	ENSSSCT00000003454	ENSSSCG00000003114	Exon 13	DHX34
6	48584315	48584317	Deletion	3	○	○	○	○	○	●	○	○	○	●	Nonframeshift	ENSSSCT00000003454	ENSSSCG00000003114	Exon 13	DHX34
6	48942293	48942293	Insertion	13	○	○	●	○	●	○	○	○	●	○	Frameshift	ENSSSCT00000024758	ENSSSCG00000022302	Exon 7	GLTSCR1
6	48942354	48942354	Insertion	1	○	●	●	○	●	○	○	○	○	○	Frameshift	ENSSSCT00000024758	ENSSSCG00000022302	Exon 8	GLTSCR1
6	50014144	50014144	Insertion	1	○	○	●	○	○	○	○	○	○	○	Frameshift	ENSSSCT00000032531	ENSSSCG00000022324	Exon 2	PPFIA3
6	53124633	53124633	Deletion	1	○	●	○	○	○	○	○	○	○	○	Frameshift	ENSSSCT00000003621	ENSSSCG00000003260	Exon 4	VSTM1
6	53202536	53202536	Insertion	1	○	●	○	●	●	○	○	○	●	●	Frameshift	ENSSSCT00000003623	ENSSSCG00000003262	Exon 3	TFPT
6	53292408	53292408	Insertion	1	○	●	○	○	●	○	○	○	○	○	Frameshift	ENSSSCT00000027911	ENSSSCG00000029785	Exon 1	RPS9
6	53300685	53300685	Insertion	6	○	○	○	○	○	○	○	○	○	●	Nonframeshift	ENSSSCT00000023496	ENSSSCG00000028802	Exon 4	LILRA2
6	53385425	53385427	Deletion	3	○	○	○	○	○	●	○	○	○	○	Nonframeshift	ENSSSCT00000003634	ENSSSCG00000003273	Exon 9	LAIR1
6	54293287	54293287	Deletion	1	○	○	○	○	●	○	○	○	○	○	Frameshift	ENSSSCT00000023506	ENSSSCG00000028682	Exon 10	CTD-2587H24.4
6	54349771	54349771	Deletion	1	○	○	○	○	●	○	○	○	○	○	Frameshift	ENSSSCT00000030221	ENSSSCG00000026417	Exon 8	EPS8L1
6	54351489	54351489	Deletion	1	○	○	○	○	●	○	○	○	○	○	Frameshift	ENSSSCT00000030221	ENSSSCG00000026417	Exon 4	EPS8L1
6	54506441	54506441	Deletion	1	○	○	●	○	○	●	●	○	○	○	Frameshift	ENSSSCT00000026906	ENSSSCG00000022936	Exon 4	FIZ1
6	54884633	54884633	Deletion	1	○	○	○	○	●	●	●	○	○	○	Frameshift	ENSSSCT00000003670	ENSSSCG00000003306	Exon 8	HELZ2
6	55728943	55728943	Insertion	1	○	●	○	○	○	●	○	○	○	○	Frameshift	ENSSSCT00000003683	ENSSSCG00000003318	Exon 5	GALP
6	57066959	57066959	Insertion	1	○	○	●	●	○	○	○	○	○	○	Frameshift	ENSSSCT00000025688	ENSSSCG00000022411	Exon 3	ZNF814
6	57295729	57295743	Deletion	15	○	○	○	○	○	●	○	○	○	○	Nonframeshift	ENSSSCT00000004418	ENSSSCG00000003995	Exon 6	ZNF606
6	57856270	57856270	Insertion	1	○	○	○	○	○	○	○	○	○	●	Frameshift	ENSSSCT00000026215	ENSSSCG00000022204	Exon 31	AGRN
6	58238175	58238175	Deletion	1	○	○	○	○	●	●	○	○	○	●	Frameshift	ENSSSCT00000003721	ENSSSCG00000003352	Exon 12	CDK11B
6	58260470	58260470	Insertion	1	○	○	●	○	●	●	○	○	●	●	Frameshift	ENSSSCT00000003722	ENSSSCG00000003353	Exon 3	SLC35E2B
6	58656033	58656033	Insertion	1	○	○	○	●	○	○	○	○	○	○	Frameshift	ENSSSCT00000030604	ENSSSCG00000029744	Exon 1	PLCH2
6	59710564	59710564	Insertion	1	○	○	●	●	●	●	○	○	●	●	Frameshift	ENSSSCT00000025435	ENSSSCG00000021490	Exon 6	PRDM16
6	60136094	60136094	Deletion	1	○	●	●	●	○	●	○	○	●	○	Frameshift	ENSSSCT00000003731	ENSSSCG00000003362	Exon 9	CEP104
6	62357389	62357389	Insertion	1	○	○	○	○	○	○	○	○	●	○	Frameshift	ENSSSCT00000003753	ENSSSCG00000003382	Exon 4	TAS1R1
6	62357414	62357414	Insertion	1	○	●	●	●	●	●	○	○	●	●	Frameshift	ENSSSCT00000003753	ENSSSCG00000003382	Exon 4	TAS1R1
6	65771827	65771827	Deletion	1	○	○	○	●	○	○	○	○	○	○	Frameshift	ENSSSCT00000003804	ENSSSCG00000003427	Exon 18	C1orf167
6	65904496	65904496	Deletion	1	●	●	●	●	○	○	○	○	○	○	Frameshift	ENSSSCT00000003811	ENSSSCG00000003433	Exon 4	PLOD1
6	66769773	66769773	Deletion	1	○	○	○	●	○	○	○	○	○	○	Frameshift	ENSSSCT00000003820	ENSSSCG00000003440	Exon 2	AADACL4
6	66779006	66779006	Deletion	1	○	○	●	○	○	○	○	○	○	○	Frameshift	ENSSSCT00000003820	ENSSSCG00000003440	Exon 4	AADACL4
6	69660921	69660921	Insertion	1	○	●	●	○	○	○	○	○	○	○	Frameshift	ENSSSCT00000003859	ENSSSCG00000003473	Exon 5	RSG1
6	70226103	70226103	Insertion	6	○	○	○	○	○	○	○	○	○	●	Nonframeshift	ENSSSCT00000003868	ENSSSCG00000003482	Exon 2	PADI3
6	70347305	70347305	Insertion	1	○	●	●	●	○	●	●	○	●	●	Frameshift	ENSSSCT00000003871	ENSSSCG00000003485	Exon 4	RCC2
6	71555790	71555790	Deletion	1	○	○	○	○	●	○	●	○	○	○	Frameshift	ENSSSCT00000024933	ENSSSCG00000021568	Exon 1	UBR4
6	71792284	71792284	Deletion	1	●	●	●	●	●	○	○	○	○	●	Frameshift	ENSSSCT00000003876	ENSSSCG00000003489	Exon 19	EMC1
6	71815540	71815542	Deletion	3	○	○	○	○	●	○	○	○	○	○	Nonframeshift	ENSSSCT00000003877	ENSSSCG00000003490	Exon 8	MRTO4
6	71815552	71815552	Insertion	3	○	○	○	●	○	○	○	○	○	○	Nonframeshift	ENSSSCT00000003877	ENSSSCG00000003490	Exon 8	MRTO4
6	72138952	72138952	Deletion	1	●	●	●	○	●	○	●	○	○	●	Frameshift	ENSSSCT00000032404	ENSSSCG00000024669	Exon 1	MINOS1-NBL1
6	72517546	72517546	Insertion	14	○	●	●	○	○	○	●	○	○	○	Frameshift	ENSSSCT00000003882	ENSSSCG00000003494	Exon 4	PLA2G2A
6	72534983	72534983	Insertion	1	○	○	○	○	●	○	○	○	○	○	Frameshift	ENSSSCT00000003883	ENSSSCG00000003495	Exon 1
6	72636434	72636434	Insertion	10	○	●	○	○	○	○	○	○	○	○	Stopgain	ENSSSCT00000003887	ENSSSCG00000003499	Exon 2	PLA2G2C
6	72636437	72636437	Insertion	10	○	○	○	○	○	○	●	○	●	○	Stopgain	ENSSSCT00000003887	ENSSSCG00000003499	Exon 2	PLA2G2C
6	72638508	72638510	Deletion	3	○	○	○	○	○	○	●	○	○	○	Nonframeshift	ENSSSCT00000003887	ENSSSCG00000003499	Exon 1	PLA2G2C
6	73184634	73184634	Insertion	1	○	○	○	○	○	○	○	○	●	○	Frameshift	ENSSSCT00000003898	ENSSSCG00000003508	Exon 1	KIF17
6	73230546	73230546	Deletion	1	●	●	●	○	●	○	●	○	●	●	Frameshift	ENSSSCT00000003901	ENSSSCG00000003511	Exon 8	HP1BP3
6	77207727	77207728	Deletion	2	○	○	●	○	○	○	○	○	○	○	Frameshift	ENSSSCT00000023469	ENSSSCG00000028387	Exon 20	CNKSR1
6	77473911	77473911	Deletion	1	○	○	●	○	○	○	○	○	○	○	Frameshift	ENSSSCT00000003952	ENSSSCG00000003558	Exon 19	RPS6KA1
6	77821509	77821509	Insertion	1	○	●	●	○	○	●	○	●	●	●	Frameshift	ENSSSCT00000003960	ENSSSCG00000003566	Exon 8	NUDC
6	78207070	78207070	Insertion	1	○	●	●	●	○	●	●	●	●	●	Frameshift	ENSSSCT00000003971	ENSSSCG00000003577	Exon 3	WASF2
6	78527496	78527496	Insertion	1	○	○	●	●	○	●	●	●	●	●	Frameshift	ENSSSCT00000030562	ENSSSCG00000021634	Exon 6	PPP1R8
6	78563453	78563455	Deletion	3	○	●	●	○	○	○	○	○	○	○	Nonframeshift	ENSSSCT00000032574	ENSSSCG00000003584	Exon 4	THEMIS2
6	78619733	78619738	Deletion	6	●	●	●	●	○	○	●	●	○	○	Nonframeshift	ENSSSCT00000003977	ENSSSCG00000003582	Exon 5	SMPDL3B
6	81613769	81613771	Deletion	3	○	○	○	○	○	○	●	○	○	○	Nonframeshift	ENSSSCT00000027303	ENSSSCG00000023505	Exon 1	ZCCHC17
6	81613801	81613801	Insertion	1	○	●	●	●	●	●	●	○	●	●	Frameshift	ENSSSCT00000027303	ENSSSCG00000023505	Exon 1	ZCCHC17
6	81615824	81615824	Insertion	1	○	●	●	●	●	●	○	○	●	●	Frameshift	ENSSSCT00000027303	ENSSSCG00000023505	Exon 2	ZCCHC17
6	82014698	82014698	Deletion	1	○	○	●	○	●	●	●	●	○	○	Frameshift	ENSSSCT00000003998	ENSSSCG00000003603	Exon 4	COL16A1
6	82014733	82014733	Insertion	1	○	○	●	○	●	●	●	●	○	○	Frameshift	ENSSSCT00000003998	ENSSSCG00000003603	Exon 4	COL16A1
6	82211972	82211974	Deletion	3	○	○	○	○	○	○	○	○	○	●	Nonframeshift	ENSSSCT00000004001	ENSSSCG00000003606	Exon 1	SPOCD1
6	82921176	82921176	Deletion	1	○	●	●	●	○	●	●	○	●	●	Frameshift	ENSSSCT00000026387	ENSSSCG00000022120	Exon 3	RP1-27O5.3
6	83155941	83155941	Insertion	1	○	●	○	●	●	●	●	○	●	●	Frameshift	ENSSSCT00000024488	ENSSSCG00000022801	Exon 1	S100PBP
6	83224290	83224290	Deletion	1	○	●	○	○	○	○	○	○	○	○	Frameshift	ENSSSCT00000023203	ENSSSCG00000026455	Exon 6	TMEM54
6	83490899	83490899	Insertion	1	○	○	○	○	○	●	●	○	○	○	Frameshift	ENSSSCT00000004015	ENSSSCG00000003619	Exon 10	AZIN2
6	83563755	83563760	Deletion	6	●	○	●	●	●	●	○	○	○	○	Nonframeshift	ENSSSCT00000027638	ENSSSCG00000029841	Exon 3	ZNF362
6	83565612	83565615	Deletion	4	●	○	●	●	○	○	○	○	○	○	Frameshift	ENSSSCT00000027638	ENSSSCG00000029841	Exon 8	ZNF362
6	83624874	83624874	Insertion	3	○	○	○	○	○	○	○	○	●	○	Nonframeshift	ENSSSCT00000030588	ENSSSCG00000029181	Exon 1
6	90795665	90795665	Insertion	15	○	●	●	○	○	○	○	○	○	○	Nonframeshift	ENSSSCT00000028648	ENSSSCG00000024644	Exon 5	CIDEA
6	90822796	90822796	Deletion	1	○	○	●	○	○	○	○	○	●	○	Frameshift	ENSSSCT00000025900	ENSSSCG00000022947	Exon 9	AFG3L2
6	90822830	90822830	Deletion	1	○	●	●	○	○	●	●	○	●	○	Frameshift	ENSSSCT00000025900	ENSSSCG00000022947	Exon 9	AFG3L2
6	92079017	92079017	Deletion	1	●	○	●	●	●	●	○	●	●	●	Frameshift	ENSSSCT00000004080	ENSSSCG00000003682	Exon 7	ANKRD12
6	92352813	92352813	Insertion	1	○	○	●	●	●	○	○	○	●	●	Frameshift	ENSSSCT00000024838	ENSSSCG00000003684	Exon 17	MTCL1
6	99401156	99401156	Deletion	1	○	●	○	●	●	●	○	○	○	○	Frameshift	ENSSSCT00000031178	ENSSSCG00000028010	Exon 1	ABHD3
6	101259246	101259246	Insertion	1	○	○	●	○	●	○	●	○	●	●	Frameshift	ENSSSCT00000027989	ENSSSCG00000025584	Exon 19	LAMA3
6	107987923	107987923	Deletion	1	○	○	●	○	●	○	○	○	○	○	Frameshift	ENSSSCT00000027548	ENSSSCG00000027160	Exon 1	DSG3
6	111605082	111605082	Deletion	1	○	○	○	○	○	○	○	○	●	○	Frameshift	ENSSSCT00000031046	ENSSSCG00000027375	Exon 2
6	111605313	111605314	Deletion	2	○	○	○	○	○	○	○	○	●	○	Frameshift	ENSSSCT00000031046	ENSSSCG00000027375	Exon 2
6	112388673	112388673	Insertion	1	●	○	●	●	●	●	○	○	○	○	Frameshift	ENSSSCT00000025953	ENSSSCG00000027455	Exon 9	SLC39A6
6	112409070	112409072	Deletion	3	○	○	○	○	●	○	○	○	○	○	Nonframeshift	ENSSSCT00000025953	ENSSSCG00000027455	Exon 1	SLC39A6
6	113112063	113112063	Insertion	5	○	○	●	●	●	○	○	○	○	○	Frameshift	ENSSSCT00000004148	ENSSSCG00000003746	Exon 2	RPSA
6	113112094	113112097	Deletion	4	○	○	●	●	○	○	○	○	○	○	Frameshift	ENSSSCT00000004148	ENSSSCG00000003746	Exon 2	RPSA
6	113112506	113112506	Insertion	2	○	○	●	○	○	○	○	○	○	○	Frameshift	ENSSSCT00000004148	ENSSSCG00000003746	Exon 2	RPSA
6	113852820	113852820	Insertion	1	●	●	●	●	●	●	○	○	●	●	Frameshift	ENSSSCT00000004150	ENSSSCG00000003748	Exon 8	CELF4
6	119199847	119199847	Insertion	1	○	○	●	○	○	○	○	○	○	○	Frameshift	ENSSSCT00000029373	ENSSSCG00000027618	Exon 1
6	125237685	125237699	Deletion	15	○	○	○	○	○	○	○	○	○	●	Nonframeshift	ENSSSCT00000004167	ENSSSCG00000003765	Exon 3	SURF6
6	126450170	126450172	Deletion	3	○	●	○	○	○	○	○	○	○	●	Nonframeshift	ENSSSCT00000029126	ENSSSCG00000029984	Exon 2
6	136685543	136685545	Deletion	3	○	○	○	○	○	●	○	○	○	○	Nonframeshift	ENSSSCT00000004217	ENSSSCG00000003810	Exon 10	UBE2U
6	138356518	138356526	Deletion	9	○	○	○	○	●	○	○	○	○	●	Nonframeshift	ENSSSCT00000004229	ENSSSCG00000003821	Exon 2	KANK4
6	139876306	139876306	Insertion	1	●	○	○	○	○	○	○	○	○	○	Frameshift	ENSSSCT00000004233	ENSSSCG00000003824	Exon 8	CYP2J2
6	141544296	141544298	Deletion	3	○	●	○	○	○	○	○	○	○	○	Nonframeshift	ENSSSCT00000004240	ENSSSCG00000003831	Exon 9	OMA1
6	143689178	143689178	Insertion	7	○	●	○	○	○	○	○	○	○	○	Frameshift	ENSSSCT00000004251	ENSSSCG00000003839	Exon 1	PPAP2B
6	146505749	146505749	Insertion	6	○	○	○	○	○	○	○	●	○	●	Nonframeshift	ENSSSCT00000004259	ENSSSCG00000003847	Exon 1	DMRTB1
6	146505877	146505877	Insertion	12	○	●	○	○	○	○	○	○	○	○	Nonframeshift	ENSSSCT00000004259	ENSSSCG00000003847	Exon 1	DMRTB1
6	147859095	147859095	Insertion	1	○	○	●	●	○	○	○	○	○	○	Frameshift	ENSSSCT00000004280	ENSSSCG00000003868	Exon 1	KTI12
6	148324380	148324380	Deletion	1	○	○	●	○	○	○	○	○	○	○	Frameshift	ENSSSCT00000004283	ENSSSCG00000003871	Exon 12
6	151800688	151800690	Deletion	3	●	○	○	○	○	○	○	○	○	●	Nonframeshift	ENSSSCT00000004301	ENSSSCG00000003888	Exon 14
6	152370685	152370685	Insertion	1	○	○	○	●	○	●	●	○	●	○	Frameshift	ENSSSCT00000004311	ENSSSCG00000003897	Exon 3	MOB3C
6	152596071	152596071	Insertion	3	○	○	○	○	○	●	○	○	●	○	Nonframeshift	ENSSSCT00000031546	ENSSSCG00000022704	Exon 2
6	153257568	153257568	Insertion	1	○	●	○	●	○	●	○	○	○	○	Frameshift	ENSSSCT00000004329	ENSSSCG00000003914	Exon 2	PRDX1
6	154767693	154767693	Insertion	1	○	●	○	○	●	●	○	○	○	○	Frameshift	ENSSSCT00000030846	ENSSSCG00000026793	Exon 4	B4GALT2
6	155199710	155199710	Deletion	1	●	●	○	○	●	●	○	○	○	○	Frameshift	ENSSSCT00000004359	ENSSSCG00000003941	Exon 28	SZT2
6	155718662	155718663	Deletion	2	○	○	●	○	○	○	○	○	○	○	Frameshift	ENSSSCT00000004383	ENSSSCG00000003963	Exon 2
6	157373022	157373022	Insertion	1	○	●	●	●	●	○	●	●	●	○	Frameshift	ENSSSCT00000004396	ENSSSCG00000003974	Exon 1	CITED4
6	157373052	157373052	Insertion	1	○	●	●	●	●	○	●	●	●	●	Frameshift	ENSSSCT00000004396	ENSSSCG00000003974	Exon 1	CITED4
7	916821	916821	Deletion	1	○	○	●	○	○	○	○	○	○	○	Frameshift	ENSSSCT00000001082	ENSSSCG00000000992	Exon 2	FOXF2
7	2512415	2512417	Deletion	3	○	●	○	○	○	○	○	○	○	○	Nonframeshift	ENSSSCT00000001093	ENSSSCG00000001001	Exon 4	C6orf201
7	3696043	3696043	Insertion	1	○	○	○	●	○	○	○	○	○	○	Frameshift	ENSSSCT00000030254	ENSSSCG00000027136	Exon 4	F13A1
7	4647588	4647599	Deletion	12	○	○	○	○	○	○	●	○	○	○	Nonframeshift	ENSSSCT00000001114	ENSSSCG00000001021	Exon 8	RREB1
7	5015428	5015428	Insertion	1	○	●	○	●	○	●	●	●	○	○	Frameshift	ENSSSCT00000001118	ENSSSCG00000001025	Exon 22	DSP
7	5019616	5019616	Insertion	6	○	●	○	○	○	○	○	○	○	○	Nonframeshift	ENSSSCT00000001118	ENSSSCG00000001025	Exon 23	DSP
7	5163429	5163431	Deletion	3	○	●	●	●	○	○	○	○	○	○	Nonframeshift	ENSSSCT00000001120	ENSSSCG00000001027	Exon 1	BMP6
7	5163657	5163657	Insertion	6	○	●	○	○	○	○	○	○	○	○	Nonframeshift	ENSSSCT00000001120	ENSSSCG00000001027	Exon 1	BMP6
7	7035746	7035754	Deletion	9	○	○	●	○	○	○	○	○	○	○	Nonframeshift	ENSSSCT00000022619	ENSSSCG00000001035	Exon 7	OFCC1
7	7749468	7749470	Deletion	3	●	○	○	○	○	○	○	○	○	○	Nonframeshift	ENSSSCT00000001134	ENSSSCG00000001040	Exon 2	C6orf52
7	9061809	9061809	Insertion	3	○	○	●	●	●	○	●	●	●	●	Nonframeshift	ENSSSCT00000001143	ENSSSCG00000001049	Exon 8	HIVEP1
7	10799484	10799492	Deletion	9	○	○	○	○	●	○	○	○	○	○	Nonframeshift	ENSSSCT00000033515	ENSSSCG00000021576	Exon 1	CD83
7	14080806	14080808	Deletion	3	○	●	○	○	○	○	○	○	○	○	Nonframeshift	ENSSSCT00000001165	ENSSSCG00000001070	Exon 1	FAM8A1
7	14080915	14080915	Deletion	1	○	●	○	○	○	○	●	●	○	●	Frameshift	ENSSSCT00000001165	ENSSSCG00000001070	Exon 2	FAM8A1
7	14122339	14122341	Deletion	3	○	●	●	○	●	○	○	○	○	○	Nonframeshift	ENSSSCT00000025406	ENSSSCG00000026034	Exon 15	NUP153
7	16774800	16774800	Insertion	1	○	○	○	○	○	○	○	●	○	○	Frameshift	ENSSSCT00000001174	ENSSSCG00000001079	Exon 7	E2F3
7	20524478	20524478	Insertion	1	●	●	●	●	○	○	●	○	●	○	Frameshift	ENSSSCT00000001186	ENSSSCG00000001090	Exon 9	ALDH5A1
7	23089412	23089412	Deletion	1	○	○	●	○	○	○	○	○	●	○	Frameshift	ENSSSCT00000001265	ENSSSCG00000024918	Exon 1	HIST1H3G
7	25383630	25383630	Insertion	1	○	○	○	○	○	○	●	○	○	○	Frameshift	ENSSSCT00000001370	ENSSSCG00000001255	Exon 1
7	26940782	26940790	Deletion	9	○	○	○	●	○	○	○	○	○	○	Nonframeshift	ENSSSCT00000036384	ENSSSCG00000001377	Exon 2	PPP1R18
7	26958432	26958432	Insertion	3	○	○	○	●	○	○	●	○	○	○	Nonframeshift	ENSSSCT00000001480	ENSSSCG00000001362	Exon 8	MDC1
7	27614080	27614080	Insertion	1	○	○	○	●	○	○	○	○	○	○	Frameshift	ENSSSCT00000001524	ENSSSCG00000024161	Exon 1	HLA-A
7	37867210	37867210	Deletion	1	●	●	●	●	○	●	○	○	○	●	Frameshift	ENSSSCT00000001757	ENSSSCG00000001578	Exon 8	RNF8
7	41649706	41649706	Insertion	1	●	●	●	○	●	●	●	●	○	●	Frameshift	ENSSSCT00000001785	ENSSSCG00000001605	Exon 1	TSPO2
7	42493150	42493150	Deletion	1	○	○	○	○	○	○	●	●	●	○	Frameshift	ENSSSCT00000031143	ENSSSCG00000026752	Exon 1	CCND3
7	50414822	50414822	Insertion	1	○	●	●	●	●	●	○	○	●	●	Frameshift	ENSSSCT00000001949	ENSSSCG00000001743	Exon 2	DEFB110
7	52033876	52033876	Deletion	1	●	●	●	●	●	●	○	●	●	●	Frameshift	ENSSSCT00000001952	ENSSSCG00000001746	Exon 64	PKHD1
7	52033900	52033900	Insertion	1	●	●	●	●	●	●	○	●	●	●	Frameshift	ENSSSCT00000001952	ENSSSCG00000001746	Exon 64	PKHD1
7	52302223	52302223	Deletion	1	○	●	○	○	○	○	○	○	○	○	Frameshift	ENSSSCT00000001952	ENSSSCG00000001746	Exon 30	PKHD1
7	57659428	57659436	Deletion	9	○	○	○	○	○	○	○	○	●	○	Nonframeshift	ENSSSCT00000002022	ENSSSCG00000001806	Exon 6	FSD2
7	57947261	57947261	Insertion	1	○	●	●	○	●	●	●	●	●	○	Frameshift	ENSSSCT00000002032	ENSSSCG00000001810	Exon 7	PDE8A
7	58438939	58438939	Insertion	6	○	○	○	○	○	○	○	●	○	○	Nonframeshift	ENSSSCT00000002035	ENSSSCG00000001816	Exon 8	BLM
7	58703979	58703979	Insertion	1	○	●	○	○	○	○	○	○	○	○	Frameshift	ENSSSCT00000002044	ENSSSCG00000001825	Exon 10	SLC41A3
7	58932110	58932110	Deletion	1	○	○	○	○	●	○	○	○	○	○	Frameshift	ENSSSCT00000028696	ENSSSCG00000001827	Exon 5	IGF2BP1
7	59760719	59760719	Deletion	1	○	○	●	●	●	●	●	●	●	●	Frameshift	ENSSSCT00000002058	ENSSSCG00000001836	Exon 6	RLBP1
7	62663210	62663210	Insertion	1	○	○	●	●	●	●	●	○	●	●	Frameshift	ENSSSCT00000002098	ENSSSCG00000001873	Exon 5	CSPG4
7	63009969	63009969	Insertion	3	○	○	●	○	●	○	○	○	○	○	Nonframeshift	ENSSSCT00000002108	ENSSSCG00000001883	Exon 3
7	63073553	63073553	Insertion	1	○	●	●	●	●	●	○	●	●	○	Frameshift	ENSSSCT00000002110	ENSSSCG00000001885	Exon 3	C15orf39
7	63073680	63073680	Insertion	1	○	●	●	●	●	●	○	●	●	○	Frameshift	ENSSSCT00000002110	ENSSSCG00000001885	Exon 3	C15orf39
7	63074435	63074435	Deletion	1	○	●	●	●	○	○	○	○	○	○	Frameshift	ENSSSCT00000002110	ENSSSCG00000001885	Exon 1	C15orf39
7	64353572	64353572	Insertion	3	○	●	●	○	○	○	○	○	○	○	Nonframeshift	ENSSSCT00000002145	ENSSSCG00000001916	Exon 2	C15orf59
7	64634057	64634057	Deletion	1	○	●	●	●	●	○	●	●	●	●	Frameshift	ENSSSCT00000002149	ENSSSCG00000001920	Exon 1	HCN4
7	64672694	64672694	Insertion	9	○	●	●	○	●	○	○	●	●	●	Nonframeshift	ENSSSCT00000002149	ENSSSCG00000001920	Exon 9	HCN4
7	65365619	65365619	Insertion	1	○	●	●	●	●	○	●	●	●	●	Frameshift	ENSSSCT00000030450	ENSSSCG00000023188	Exon 1
7	68333838	68333838	Insertion	3	○	○	●	○	○	○	○	○	○	○	Nonframeshift	ENSSSCT00000002176	ENSSSCG00000001944	Exon 2	NKX2-8
7	69736290	69736290	Deletion	1	●	○	○	●	●	●	○	●	●	●	Frameshift	ENSSSCT00000002188	ENSSSCG00000001956	Exon 8
7	72236676	72236676	Deletion	1	●	○	●	○	○	○	○	○	○	○	Frameshift	ENSSSCT00000002199	ENSSSCG00000001966	Exon 1	ARHGAP5
7	73274321	73274321	Deletion	1	●	●	●	●	●	●	○	●	●	○	Frameshift	ENSSSCT00000002204	ENSSSCG00000001971	Exon 25	HECTD1
7	73274366	73274366	Insertion	1	●	●	●	●	●	●	○	●	●	○	Frameshift	ENSSSCT00000002204	ENSSSCG00000001971	Exon 26	HECTD1
7	80242315	80242315	Deletion	1	○	○	○	○	○	○	○	○	●	○	Frameshift	ENSSSCT00000002224	ENSSSCG00000001988	Exon 23	ADCY4
7	80242356	80242356	Deletion	1	●	●	●	●	○	●	●	○	●	○	Frameshift	ENSSSCT00000002224	ENSSSCG00000001988	Exon 23	ADCY4
7	80438302	80438302	Insertion	6	○	○	●	○	○	○	○	○	○	○	Nonframeshift	ENSSSCT00000002246	ENSSSCG00000002007	Exon 3	FITM1
7	80438592	80438592	Deletion	1	○	○	●	●	○	●	●	○	●	○	Frameshift	ENSSSCT00000002246	ENSSSCG00000002007	Exon 2	FITM1
7	81078734	81078734	Insertion	2	○	●	○	○	●	●	○	○	○	○	Frameshift	ENSSSCT00000002271	ENSSSCG00000002029	Exon 19	MYH7
7	81306162	81306162	Insertion	1	○	●	○	○	●	●	●	●	●	○	Frameshift	ENSSSCT00000002276	ENSSSCG00000002034	Exon 7	ACIN1
7	81642477	81642477	Insertion	1	○	●	●	○	●	●	○	○	●	●	Frameshift	ENSSSCT00000002294	ENSSSCG00000002051	Exon 7	ABHD4
7	81755656	81755658	Deletion	3	○	○	●	○	○	○	○	○	○	○	Nonframeshift	ENSSSCT00000002290	ENSSSCG00000002047	Exon 1
7	82485852	82485852	Deletion	1	○	○	●	○	○	○	○	○	○	○	Frameshift	ENSSSCT00000002331	ENSSSCG00000002084	Exon 2	TRAV8-4
7	82992685	82992685	Insertion	3	○	●	●	●	●	○	○	○	○	○	Nonframeshift	ENSSSCT00000031004	ENSSSCG00000022705	Exon 4	SALL2
7	82992703	82992703	Insertion	6	○	○	●	●	○	○	○	○	○	○	Nonframeshift	ENSSSCT00000031004	ENSSSCG00000022705	Exon 4	SALL2
7	82993760	82993760	Insertion	6	○	○	●	●	○	○	○	○	○	○	Nonframeshift	ENSSSCT00000031004	ENSSSCG00000022705	Exon 6	SALL2
7	83669219	83669219	Insertion	1	○	○	●	○	○	○	○	○	○	○	Frameshift	ENSSSCT00000022295	ENSSSCG00000022702	Exon 3
7	86148310	86148310	Insertion	1	●	●	●	●	●	●	○	○	●	○	Frameshift	ENSSSCT00000002496	ENSSSCG00000002241	Exon 7	NUTM1
7	94846568	94846568	Insertion	1	○	○	○	○	●	●	○	○	○	○	Frameshift	ENSSSCT00000002527	ENSSSCG00000002269	Exon 1	MTHFD1
7	95188585	95188585	Insertion	6	○	○	○	○	●	○	○	○	○	○	Nonframeshift	ENSSSCT00000002534	ENSSSCG00000002276	Exon 15	PLEKHG3
7	95188585	95188585	Insertion	9	○	○	○	○	○	●	○	○	○	○	Nonframeshift	ENSSSCT00000002534	ENSSSCG00000002276	Exon 15	PLEKHG3
7	96980967	96980967	Deletion	1	●	●	●	○	○	○	●	●	●	●	Frameshift	ENSSSCT00000002545	ENSSSCG00000002285	Exon 5	GPHN
7	97590498	97590498	Deletion	1	○	●	●	●	●	○	●	●	●	●	Frameshift	ENSSSCT00000002553	ENSSSCG00000002292	Exon 6	PLEKHH1
7	98895228	98895228	Insertion	1	●	○	○	○	○	○	○	○	○	○	Frameshift	ENSSSCT00000025622	ENSSSCG00000025196	Exon 5	ACTN1
7	103465387	103465387	Deletion	1	●	○	●	○	●	○	●	●	●	●	Frameshift	ENSSSCT00000002625	ENSSSCG00000002361	Exon 1	VRTN
7	110045704	110045704	Insertion	1	●	●	○	●	●	○	●	●	●	○	Frameshift	ENSSSCT00000002681	ENSSSCG00000002412	Exon 4	STON2
7	117316581	117316581	Insertion	1	○	●	●	●	●	○	○	○	○	○	Frameshift	ENSSSCT00000028642	ENSSSCG00000026883	Exon 1
7	119404965	119404965	Insertion	2	●	●	○	○	●	○	○	○	○	●	Frameshift	ENSSSCT00000002708	ENSSSCG00000002438	Exon 1	C14orf159
7	119408828	119408829	Deletion	2	○	○	○	○	●	○	○	○	○	○	Frameshift	ENSSSCT00000002708	ENSSSCG00000002438	Exon 2	C14orf159
7	119424017	119424017	Deletion	1	○	○	○	●	○	○	●	○	○	●	Frameshift	ENSSSCT00000002708	ENSSSCG00000002438	Exon 9	C14orf159
7	119431439	119431439	Deletion	1	○	●	●	○	●	○	○	●	○	○	Frameshift	ENSSSCT00000002708	ENSSSCG00000002438	Exon 15	C14orf159
7	120849129	120849129	Insertion	1	○	○	●	●	●	○	●	●	○	●	Frameshift	ENSSSCT00000002725	ENSSSCG00000002455	Exon 1	GOLGA5
7	120963638	120963638	Deletion	1	○	●	●	●	●	○	○	○	○	●	Frameshift	ENSSSCT00000002726	ENSSSCG00000002456	Exon 8	CHGA
7	122598808	122598810	Deletion	3	●	●	●	○	○	○	○	○	○	○	Nonframeshift	ENSSSCT00000022252	ENSSSCG00000023268	Exon 1
7	124894529	124894529	Insertion	1	○	●	●	○	○	○	●	●	●	●	Frameshift	ENSSSCT00000002782	ENSSSCG00000002504	Exon 8	AK7
7	130832348	130832348	Insertion	3	○	○	○	○	●	○	○	○	○	○	Nonframeshift	ENSSSCT00000002829	ENSSSCG00000002546	Exon 1	XRCC3
7	131039089	131039089	Insertion	6	○	○	○	○	○	●	○	○	○	○	Stopgain	ENSSSCT00000002836	ENSSSCG00000002552	Exon 1	TDRD9
7	133688097	133688097	Insertion	2	○	○	●	○	○	○	○	○	○	○	Frameshift	ENSSSCT00000029222	ENSSSCG00000025366	Exon 2	OR11H2
7	133767365	133767365	Insertion	1	○	○	○	○	○	○	○	●	○	○	Frameshift	ENSSSCT00000002903	ENSSSCG00000023213	Exon 1
8	607	607	Insertion	1	○	○	●	○	●	●	●	○	●	○	Frameshift	ENSSSCT00000030183	ENSSSCG00000021289	Exon 1	GAK
8	58421	58434	Deletion	14	○	○	○	○	●	○	○	○	○	○	Frameshift	ENSSSCT00000025831	ENSSSCG00000029481	Exon 1	CPLX1
8	375714	375714	Insertion	1	○	●	●	●	○	○	○	○	●	○	Frameshift	ENSSSCT00000033698	ENSSSCG00000008675	Exon 1	LETM1
8	1095800	1095801	Deletion	2	○	○	○	○	●	○	○	○	○	○	Frameshift	ENSSSCT00000029015	ENSSSCG00000029745	Exon 16	FAM193A
8	2048713	2048724	Deletion	12	○	●	○	○	○	○	○	○	○	○	Nonframeshift	ENSSSCT00000009522	ENSSSCG00000008703	Exon 1	ADRA2C
8	2272945	2272953	Deletion	9	○	○	○	●	○	○	○	○	○	○	Frameshift	ENSSSCT00000030859	ENSSSCG00000029906	Exon 3
8	3248895	3248895	Deletion	1	●	●	●	●	○	○	●	●	●	●	Frameshift	ENSSSCT00000009532	ENSSSCG00000008713	Exon 5	KIAA0232
8	4650967	4650970	Deletion	4	○	○	●	○	○	○	○	○	○	○	Frameshift	ENSSSCT00000023740	ENSSSCG00000008720	Exon 4	HMX1
8	8718118	8718120	Deletion	3	○	○	●	●	○	○	○	○	○	○	Nonframeshift	ENSSSCT00000029872	ENSSSCG00000024594	Exon 2	NKX3-2
8	10648994	10648996	Deletion	3	○	●	○	○	○	○	○	○	○	○	Nonframeshift	ENSSSCT00000029642	ENSSSCG00000027862	Exon 1	FAM200B
8	12487766	12487766	Insertion	1	○	○	●	○	○	●	●	○	○	○	Frameshift	ENSSSCT00000029582	ENSSSCG00000026232	Exon 1	FAM184B
8	15433141	15433141	Insertion	1	○	○	●	○	○	○	○	○	○	○	Frameshift	ENSSSCT00000009572	ENSSSCG00000008749	Exon 5	SLIT2
8	19293410	19293421	Deletion	12	●	●	●	○	○	○	○	○	○	○	Nonframeshift	ENSSSCT00000022773	ENSSSCG00000028814	Exon 1	SOD3
8	19293820	19293820	Insertion	1	○	●	●	○	●	○	○	●	●	●	Frameshift	ENSSSCT00000022773	ENSSSCG00000028814	Exon 1	SOD3
8	19300345	19300345	Insertion	3	○	●	○	●	●	○	○	○	○	○	Nonframeshift	ENSSSCT00000023266	ENSSSCG00000023001	Exon 13	CCDC149
8	19815753	19815753	Insertion	5	○	●	○	○	○	○	●	●	○	○	Frameshift	ENSSSCT00000031805	ENSSSCG00000029923	Exon 1
8	20573094	20573094	Deletion	1	●	○	○	●	○	○	○	○	○	○	Frameshift	ENSSSCT00000024906	ENSSSCG00000023501	Exon 1	CCKAR
8	29375923	29375923	Insertion	1	●	●	○	●	●	●	●	●	●	●	Frameshift	ENSSSCT00000028675	ENSSSCG00000028471	Exon 4	DTHD1
8	32107122	32107123	Deletion	2	○	○	○	○	○	○	○	○	○	●	Frameshift	ENSSSCT00000009615	ENSSSCG00000008789	Exon 16	WDR19
8	34680504	34680504	Deletion	1	●	○	●	●	○	○	●	○	○	●	Frameshift	ENSSSCT00000009627	ENSSSCG00000008800	Exon 8	TMEM33
8	39506056	39506056	Insertion	1	○	○	○	○	●	○	○	○	○	○	Frameshift	ENSSSCT00000009643	ENSSSCG00000008813	Exon 23	CORIN
8	39840559	39840559	Insertion	1	○	○	●	○	●	○	○	○	○	●	Frameshift	ENSSSCT00000009646	ENSSSCG00000008816	Exon 5	NFXL1
8	40683741	40683741	Insertion	1	○	○	○	●	○	○	○	○	○	○	Frameshift	ENSSSCT00000009658	ENSSSCG00000008826	Exon 4	FRYL
8	69726194	69726194	Insertion	3	○	○	○	○	○	○	○	●	○	○	Nonframeshift	ENSSSCT00000009769	ENSSSCG00000008921	Exon 5	CENPC
8	71505092	71505094	Deletion	3	○	○	○	○	○	○	○	●	○	○	Nonframeshift	ENSSSCT00000009793	ENSSSCG00000008940	Exon 6	GRSF1
8	75361185	75361185	Insertion	1	○	○	○	●	○	○	○	○	○	○	Frameshift	ENSSSCT00000009824	ENSSSCG00000008969	Exon 8	RCHY1
8	76139827	76139835	Deletion	9	●	○	●	○	○	●	●	●	●	○	Nonframeshift	ENSSSCT00000009836	ENSSSCG00000008981	Exon 2	FAM47E-STBD1
8	76608353	76608364	Deletion	12	○	○	○	○	○	○	○	○	●	○	Nonframeshift	ENSSSCT00000009841	ENSSSCG00000008984	Exon 6	SHROOM3
8	76608353	76608358	Deletion	6	○	●	●	●	○	○	○	●	○	○	Nonframeshift	ENSSSCT00000009841	ENSSSCG00000008984	Exon 6	SHROOM3
8	76741697	76741702	Deletion	6	○	●	●	●	○	●	●	●	○	●	Nonframeshift	ENSSSCT00000009842	ENSSSCG00000008985	Exon 1	SOWAHB
8	77933880	77933880	Insertion	1	○	○	○	○	●	○	○	○	○	○	Frameshift	ENSSSCT00000009848	ENSSSCG00000008991	Exon 1	FRAS1
8	77933881	77933881	Insertion	1	●	●	○	●	○	●	○	●	○	●	Frameshift	ENSSSCT00000009848	ENSSSCG00000008991	Exon 1	FRAS1
8	79303412	79303412	Deletion	1	○	○	○	●	●	●	○	○	○	○	Frameshift	ENSSSCT00000009857	ENSSSCG00000009000	Exon 7	DCHS2
8	79319704	79319713	Deletion	10	○	○	○	○	○	○	○	○	○	●	Frameshift	ENSSSCT00000009857	ENSSSCG00000009000	Exon 14	DCHS2
8	79319704	79319715	Deletion	12	○	○	●	○	○	○	○	○	○	○	Nonframeshift	ENSSSCT00000009857	ENSSSCG00000009000	Exon 14	DCHS2
8	81919092	81919092	Deletion	1	○	●	●	○	○	○	○	○	○	○	Frameshift	ENSSSCT00000025424	ENSSSCG00000028236	Exon 31	FAM160A1
8	81919226	81919226	Deletion	1	○	●	●	●	○	○	○	○	○	○	Frameshift	ENSSSCT00000025424	ENSSSCG00000028236	Exon 31	FAM160A1
8	81980525	81980525	Insertion	1	○	○	○	●	●	○	○	○	●	○	Frameshift	ENSSSCT00000025424	ENSSSCG00000028236	Exon 6	FAM160A1
8	82420738	82420738	Insertion	1	○	○	○	●	○	○	○	○	○	○	Frameshift	ENSSSCT00000009876	ENSSSCG00000009017	Exon 15	PRSS48
8	82429826	82429826	Deletion	1	○	○	○	○	○	○	○	○	●	○	Frameshift	ENSSSCT00000009876	ENSSSCG00000009017	Exon 10	PRSS48
8	88554404	88554404	Insertion	1	○	○	○	●	○	●	○	○	●	●	Frameshift	ENSSSCT00000009902	ENSSSCG00000009042	Exon 17	OTUD4
8	89774314	89774314	Insertion	1	○	●	●	●	○	○	○	○	○	○	Frameshift	ENSSSCT00000009910	ENSSSCG00000009049	Exon 14	USP38
8	102606857	102606860	Deletion	4	○	○	○	○	○	○	○	●	○	●	Nonframeshift	ENSSSCT00000025581	ENSSSCG00000027713	Exon 2
8	108936231	108936231	Insertion	1	○	●	○	●	●	○	●	●	●	○	Frameshift	ENSSSCT00000009956	ENSSSCG00000009090	Exon 61	KIAA1109
8	113034293	113034295	Deletion	3	○	○	○	○	○	●	●	●	●	●	Nonframeshift	ENSSSCT00000009983	ENSSSCG00000009116	Exon 4	RAB40C
8	113034457	113034457	Insertion	5	○	○	○	●	○	○	○	○	○	○	Frameshift	ENSSSCT00000009983	ENSSSCG00000009116	Exon 4	RAB40C
8	121619701	121619701	Deletion	1	○	○	○	●	○	○	○	○	○	○	Frameshift	ENSSSCT00000010013	ENSSSCG00000009144	Exon 14	ETNPPL
8	124205760	124205760	Insertion	1	●	●	●	●	●	●	●	○	○	○	Stoploss	ENSSSCT00000030690	ENSSSCG00000020821	Exon 3
8	127073713	127073713	Deletion	1	○	○	○	○	●	○	○	○	○	○	Frameshift	ENSSSCT00000010034	ENSSSCG00000009162	Exon 3	SLC9B1
8	128229423	128229423	Insertion	1	●	○	●	●	●	○	○	●	○	○	Frameshift	ENSSSCT00000010043	ENSSSCG00000009171	Exon 6	BANK1
8	128795856	128795856	Insertion	1	●	●	○	●	●	○	●	○	○	●	Frameshift	ENSSSCT00000010044	ENSSSCG00000009172	Exon 13	PPP3CA
8	130236262	130236263	Deletion	2	○	○	○	○	●	○	○	○	○	○	Frameshift	ENSSSCT00000028508	ENSSSCG00000030522	Exon 10	ADH1A
8	133765443	133765443	Insertion	1	●	○	●	○	○	○	○	○	○	○	Frameshift	ENSSSCT00000028459	ENSSSCG00000029621	Exon 15	BMPR1B
8	133765457	133765457	Insertion	1	●	○	○	○	○	○	○	○	○	○	Frameshift	ENSSSCT00000028459	ENSSSCG00000029621	Exon 14	BMPR1B
8	133776631	133776631	Insertion	1	○	○	○	○	○	○	○	○	○	●	Frameshift	ENSSSCT00000030024	ENSSSCG00000021874	Exon 4	UNC5C
8	134340837	134340837	Insertion	1	●	●	●	●	○	●	●	○	●	●	Frameshift	ENSSSCT00000010065	ENSSSCG00000009192	Exon 12	PDLIM5
8	134340867	134340867	Insertion	1	●	●	●	●	○	●	●	○	●	●	Frameshift	ENSSSCT00000010065	ENSSSCG00000009192	Exon 12	PDLIM5
8	139331653	139331653	Insertion	3	○	○	○	○	○	○	○	○	●	○	Nonframeshift	ENSSSCT00000010080	ENSSSCG00000009206	Exon 1	GPRIN3
8	139941084	139941086	Deletion	3	○	●	○	○	○	○	○	○	○	○	Nonframeshift	ENSSSCT00000010085	ENSSSCG00000009211	Exon 1	PYURF
8	140503777	140503779	Deletion	3	●	●	○	○	○	○	○	○	○	○	Nonframeshift	ENSSSCT00000010097	ENSSSCG00000009220	Exon 5	DMP1
8	140629270	140629272	Deletion	3	●	○	○	○	○	○	○	○	○	○	Nonframeshift	ENSSSCT00000010101	ENSSSCG00000009222	Exon 3	SPARCL1
8	140988754	140988759	Deletion	6	○	●	○	●	○	○	○	○	○	○	Nonframeshift	ENSSSCT00000031231	ENSSSCG00000023593	Exon 1	AFF1
8	143401749	143401749	Insertion	1	○	●	○	●	●	●	●	●	●	●	Frameshift	ENSSSCT00000010109	ENSSSCG00000009230	Exon 59	WDFY3
8	144528812	144528812	Insertion	1	○	○	○	●	●	●	●	●	●	●	Frameshift	ENSSSCT00000010119	ENSSSCG00000009239	Exon 3
8	148031534	148031534	Insertion	1	○	●	●	○	○	●	○	○	○	○	Frameshift	ENSSSCT00000024434	ENSSSCG00000027722	Exon 13	BMP2K
9	1629172	1629172	Insertion	1	○	○	●	●	●	●	●	○	○	○	Frameshift	ENSSSCT00000015932	ENSSSCG00000021486	Exon 1
9	1629197	1629197	Deletion	1	○	○	●	●	●	●	●	○	○	○	Frameshift	ENSSSCT00000015932	ENSSSCG00000021486	Exon 1
9	3230190	3230190	Deletion	1	○	●	○	○	○	○	○	●	○	○	Frameshift	ENSSSCT00000015956	ENSSSCG00000014606	Exon 1	OR10A2
9	3723418	3723427	Deletion	10	●	○	○	○	○	○	○	○	○	○	Nonframeshift	ENSSSCT00000015968	ENSSSCG00000014618	Exon 1
9	3841019	3841019	Insertion	1	○	●	●	●	○	●	●	●	○	○	Frameshift	ENSSSCT00000015972	ENSSSCG00000014622	Exon 32	DNHD1
9	3908346	3908346	Insertion	6	○	○	○	●	○	○	○	○	○	○	Nonframeshift	ENSSSCT00000015974	ENSSSCG00000014623	Exon 1	TIMM10B
9	4259819	4259819	Insertion	1	●	○	○	○	○	○	○	○	○	○	Frameshift	ENSSSCT00000030031	ENSSSCG00000028242	Exon 1	OR56A5
9	4264539	4264539	Insertion	1	○	●	○	○	○	○	○	○	○	○	Frameshift	ENSSSCT00000029488	ENSSSCG00000027721	Exon 1	OR56A5
9	4526647	4526647	Deletion	1	○	○	○	○	●	○	○	○	○	○	Frameshift	ENSSSCT00000030493	ENSSSCG00000028684	Exon 1	OR52N4
9	4562368	4562368	Deletion	1	○	●	○	○	●	○	○	●	○	○	Frameshift	ENSSSCT00000016018	ENSSSCG00000014667	Exon 3
9	4711670	4711670	Insertion	1	○	○	○	●	●	○	○	○	○	○	Frameshift	ENSSSCT00000016023	ENSSSCG00000014672	Exon 8	TRIM34
9	4899906	4899906	Insertion	1	○	●	●	●	●	●	○	○	●	●	Frameshift	ENSSSCT00000016042	ENSSSCG00000014691	Exon 1	UBQLN3
9	5642218	5642218	Insertion	2	○	●	●	○	●	○	○	○	○	○	Frameshift	ENSSSCT00000016078	ENSSSCG00000014727	Exon 1	HBB
9	6243672	6243672	Insertion	1	○	●	●	●	●	●	●	●	○	●	Frameshift	ENSSSCT00000032582	ENSSSCG00000022572	Exon 3	OR52K1
9	6518912	6518912	Insertion	1	○	●	○	●	○	○	○	○	●	●	Frameshift	ENSSSCT00000016130	ENSSSCG00000014779	Exon 1
9	6799692	6799693	Deletion	2	○	●	○	○	○	○	○	○	○	○	Frameshift	ENSSSCT00000016141	ENSSSCG00000014790	Exon 1
9	7481253	7481253	Insertion	1	●	○	○	○	○	○	○	○	○	○	Frameshift	ENSSSCT00000016160	ENSSSCG00000014809	Exon 1
9	8242817	8242817	Deletion	1	●	●	●	●	●	●	●	●	○	●	Frameshift	ENSSSCT00000016172	ENSSSCG00000014820	Exon 5	FCHSD2
9	9466147	9466149	Deletion	3	○	○	○	○	○	○	●	●	○	●	Nonframeshift	ENSSSCT00000016192	ENSSSCG00000014840	Exon 15	P4HA3
9	9479338	9479338	Insertion	1	●	●	●	○	●	○	●	●	○	●	Frameshift	ENSSSCT00000016192	ENSSSCG00000014840	Exon 9	P4HA3
9	12424422	12424422	Insertion	14	●	○	○	○	○	○	○	○	○	○	Frameshift	ENSSSCT00000016229	ENSSSCG00000014876	Exon 42	MYO7A
9	13931017	13931017	Insertion	6	○	○	○	○	○	○	○	○	○	●	Nonframeshift	ENSSSCT00000016247	ENSSSCG00000014892	Exon 3	USP35
9	13931333	13931335	Deletion	3	○	○	○	○	○	○	●	○	○	○	Nonframeshift	ENSSSCT00000016247	ENSSSCG00000014892	Exon 3	USP35
9	14442864	14442864	Insertion	5	●	○	○	●	○	○	●	●	○	○	Stopgain	ENSSSCT00000016249	ENSSSCG00000014894	Exon 28	TENM4
9	14453462	14453462	Insertion	1	○	○	○	●	○	○	○	○	○	○	Frameshift	ENSSSCT00000016249	ENSSSCG00000014894	Exon 24	TENM4
9	16491133	16491133	Deletion	1	●	○	○	○	○	○	○	○	○	○	Frameshift	ENSSSCT00000016251	ENSSSCG00000014896	Exon 1	ATP1B3
9	16491455	16491455	Insertion	9	○	○	○	○	○	○	●	○	○	●	Stopgain	ENSSSCT00000016251	ENSSSCG00000014896	Exon 1	ATP1B3
9	24334505	24334507	Deletion	3	○	○	○	●	○	○	○	○	○	○	Nonframeshift	ENSSSCT00000027396	ENSSSCG00000029865	Exon 3
9	25899804	25899804	Insertion	1	○	○	○	○	○	○	○	●	○	○	Frameshift	ENSSSCT00000016290	ENSSSCG00000014933	Exon 5	NAALAD2
9	28717695	28717695	Insertion	1	○	○	○	○	○	●	○	○	○	○	Frameshift	ENSSSCT00000016292	ENSSSCG00000014935	Exon 29	FAT3
9	29018827	29018827	Insertion	7	●	○	○	○	○	○	○	○	○	○	Frameshift	ENSSSCT00000030550	ENSSSCG00000024933	Exon 1	SLC36A4
9	29018827	29018827	Insertion	7	○	○	○	○	○	○	●	●	○	○	Frameshift	ENSSSCT00000030550	ENSSSCG00000024933	Exon 1	SLC36A4
9	29641657	29641658	Deletion	2	○	○	○	●	○	○	○	○	○	○	Frameshift	ENSSSCT00000016306	ENSSSCG00000014947	Exon 1
9	29756198	29756198	Insertion	1	●	●	○	○	●	○	○	○	●	○	Frameshift	ENSSSCT00000016304	ENSSSCG00000014946	Exon 28	CEP295
9	30503908	30503908	Insertion	1	●	●	●	●	●	○	●	●	●	●	Frameshift	ENSSSCT00000016320	ENSSSCG00000014959	Exon 19	PIWIL4
9	36632846	36632848	Deletion	3	○	○	○	○	○	●	●	○	●	●	Nonframeshift	ENSSSCT00000016341	ENSSSCG00000014979	Exon 2	KIAA1377
9	37793274	37793274	Insertion	1	●	○	●	●	○	○	○	○	●	○	Frameshift	ENSSSCT00000028497	ENSSSCG00000021975	Exon 3
9	37930563	37930563	Insertion	3	●	○	●	●	●	○	○	●	●	●	Nonframeshift	ENSSSCT00000016356	ENSSSCG00000014993	Exon 10
9	49332104	49332104	Insertion	1	○	○	○	○	○	○	○	●	○	○	Frameshift	ENSSSCT00000025641	ENSSSCG00000015071	Exon 7	SIK3
9	55299089	55299094	Deletion	6	●	●	○	○	○	○	○	○	○	○	Nonframeshift	ENSSSCT00000016508	ENSSSCG00000015142	Exon 4
9	56962825	56962825	Insertion	1	○	●	○	○	○	○	○	○	○	○	Frameshift	ENSSSCT00000016549	ENSSSCG00000026119	Exon 1
9	61519676	61519676	Deletion	1	○	●	●	○	○	○	○	○	○	○	Frameshift	ENSSSCT00000016601	ENSSSCG00000015235	Exon 5	ETS1
9	61519705	61519705	Insertion	1	○	●	●	○	○	○	○	○	○	○	Frameshift	ENSSSCT00000016601	ENSSSCG00000015235	Exon 5	ETS1
9	67502226	67502226	Insertion	1	●	●	●	●	○	●	●	○	○	●	Frameshift	ENSSSCT00000022758	ENSSSCG00000025707	Exon 20
9	70506615	70506617	Deletion	3	○	○	●	○	○	○	○	○	○	○	Nonframeshift	ENSSSCT00000016641	ENSSSCG00000015272	Exon 1	OPTC
9	71349533	71349536	Deletion	4	○	●	●	○	○	○	○	○	○	○	Nonframeshift	ENSSSCT00000025713	ENSSSCG00000026643	Exon 3
9	71888727	71888738	Deletion	12	●	○	○	○	○	○	○	○	○	○	Nonframeshift	ENSSSCT00000031275	ENSSSCG00000022951	Exon 20	NFASC
9	73856272	73856272	Insertion	1	●	●	●	●	●	○	●	○	●	●	Frameshift	ENSSSCT00000033310	ENSSSCG00000015654	Exon 2	IL20
9	74071583	74071583	Deletion	1	●	●	●	●	●	●	○	○	●	●	Frameshift	ENSSSCT00000017058	ENSSSCG00000015660	Exon 6	PFKFB2
9	77752360	77752360	Deletion	1	○	○	○	○	●	○	○	○	○	○	Frameshift	ENSSSCT00000016681	ENSSSCG00000015308	Exon 3
9	77752730	77752742	Deletion	13	○	○	○	○	○	○	○	○	○	●	Frameshift	ENSSSCT00000016681	ENSSSCG00000015308	Exon 1
9	78683101	78683103	Deletion	3	●	●	○	○	●	○	●	○	●	○	Nonframeshift	ENSSSCT00000016683	ENSSSCG00000015310	Exon 13	AKAP9
9	78755065	78755065	Deletion	1	●	●	●	●	●	●	●	●	●	●	Frameshift	ENSSSCT00000016683	ENSSSCG00000015310	Exon 35	AKAP9
9	78907241	78907241	Insertion	1	○	○	●	○	○	○	○	○	○	●	Frameshift	ENSSSCT00000016686	ENSSSCG00000015313	Exon 3	KRIT1
9	79089700	79089700	Insertion	1	○	○	●	○	○	○	○	○	○	○	Frameshift	ENSSSCT00000023860	ENSSSCG00000025577	Exon 2	GATAD1
9	79138160	79138160	Insertion	1	●	●	●	●	●	●	●	●	●	●	Frameshift	ENSSSCT00000022601	ENSSSCG00000029967	Exon 16	PEX1
9	82252396	82252404	Deletion	9	●	○	○	○	●	●	●	●	○	○	Nonframeshift	ENSSSCT00000027564	ENSSSCG00000023414	Exon 1	PON1
9	93307648	93307649	Deletion	2	○	●	○	○	○	○	●	○	○	○	Frameshift	ENSSSCT00000016731	ENSSSCG00000015356	Exon 1	AGMO
9	97328948	97328948	Insertion	3	○	○	○	○	○	○	○	○	○	●	Nonframeshift	ENSSSCT00000016745	ENSSSCG00000015370	Exon 1	TWIST1
9	97328949	97328954	Deletion	6	○	○	●	○	○	○	○	○	○	○	Nonframeshift	ENSSSCT00000016745	ENSSSCG00000015370	Exon 1	TWIST1
9	99756302	99756302	Insertion	1	○	●	●	●	○	●	●	○	●	●	Frameshift	ENSSSCT00000016753	ENSSSCG00000015378	Exon 2
9	114070937	114070937	Insertion	1	●	●	●	●	●	●	●	●	●	●	Frameshift	ENSSSCT00000016805	ENSSSCG00000015426	Exon 74	RELN
9	118232976	118232976	Insertion	1	●	●	●	●	○	●	●	●	●	●	Frameshift	ENSSSCT00000024025	ENSSSCG00000028585	Exon 6	CBLL1
9	118232989	118232989	Insertion	1	●	●	●	●	○	●	●	●	●	●	Frameshift	ENSSSCT00000024025	ENSSSCG00000028585	Exon 7	CBLL1
9	119580988	119580991	Deletion	4	○	○	●	○	○	○	○	○	○	○	Frameshift	ENSSSCT00000022370	ENSSSCG00000023584	Exon 5	TRGC1
9	119594905	119594905	Deletion	1	○	○	○	○	○	○	●	○	○	○	Frameshift	ENSSSCT00000029694	ENSSSCG00000029596	Exon 2	TRGC1
9	127759902	127759902	Insertion	2	●	○	○	○	○	○	○	○	○	○	Frameshift	ENSSSCT00000016876	ENSSSCG00000015492	Exon 10	DARS2
9	128967259	128967259	Deletion	1	○	○	●	○	○	○	○	○	○	○	Frameshift	ENSSSCT00000016893	ENSSSCG00000015506	Exon 26	TNN
9	130583758	130583758	Deletion	1	○	○	●	○	○	○	○	○	○	○	Frameshift	ENSSSCT00000016901	ENSSSCG00000015514	Exon 2
9	133544429	133544429	Insertion	1	●	●	●	○	●	●	●	●	●	●	Frameshift	ENSSSCT00000030989	ENSSSCG00000030296	Exon 8	CEP350
9	133544446	133544446	Insertion	1	●	●	●	○	●	●	●	●	●	●	Frameshift	ENSSSCT00000030989	ENSSSCG00000030296	Exon 8	CEP350
9	134640479	134640479	Deletion	1	○	●	○	○	○	○	○	○	○	○	Frameshift	ENSSSCT00000016929	ENSSSCG00000015540	Exon 4	MR1
9	135385112	135385112	Deletion	1	●	●	●	●	●	●	●	●	●	●	Frameshift	ENSSSCT00000016932	ENSSSCG00000015543	Exon 12	CACNA1E
9	136548583	136548583	Insertion	1	○	○	○	●	○	●	○	●	●	●	Frameshift	ENSSSCT00000016945	ENSSSCG00000015555	Exon 29	LAMC1
9	137611141	137611141	Insertion	2	○	●	●	●	●	●	○	●	●	○	Frameshift	ENSSSCT00000030440	ENSSSCG00000030217	Exon 1	COLGALT2
9	142212368	142212368	Insertion	1	○	●	●	●	●	●	●	●	●	●	Frameshift	ENSSSCT00000016976	ENSSSCG00000015583	Exon 2	SMYD2
9	143635471	143635471	Insertion	1	●	●	●	●	●	●	●	●	●	○	Frameshift	ENSSSCT00000016987	ENSSSCG00000015594	Exon 3	BATF3
9	144016651	144016651	Insertion	4	○	○	○	○	○	○	●	●	○	○	Frameshift	ENSSSCT00000016991	ENSSSCG00000015598	Exon 2	TMEM206
9	144016715	144016717	Deletion	3	○	○	○	○	○	●	●	○	●	○	Nonframeshift	ENSSSCT00000016991	ENSSSCG00000015598	Exon 2	TMEM206
9	144592433	144592435	Deletion	3	○	○	○	○	○	○	●	○	●	○	Nonframeshift	ENSSSCT00000016997	ENSSSCG00000015604	Exon 6	NEK2
9	145774849	145774849	Insertion	3	●	○	○	○	○	○	○	○	○	○	Nonframeshift	ENSSSCT00000027635	ENSSSCG00000026404	Exon 3	SERTAD4
9	146509937	146509937	Insertion	1	●	●	●	●	●	●	●	●	●	●	Frameshift	ENSSSCT00000017013	ENSSSCG00000015619	Exon 5	CAMK1G
9	147054565	147054567	Deletion	3	○	●	○	○	○	○	○	○	○	○	Nonframeshift	ENSSSCT00000017014	ENSSSCG00000015620	Exon 1	TIAL1
9	147054985	147054985	Insertion	15	○	○	○	○	●	○	○	○	○	○	Nonframeshift	ENSSSCT00000017014	ENSSSCG00000015620	Exon 1	TIAL1
9	148305079	148305079	Insertion	1	○	●	●	●	●	●	●	●	○	●	Frameshift	ENSSSCT00000029838	ENSSSCG00000026412	Exon 27	PLXNA2
9	150067135	150067135	Insertion	3	○	●	●	●	●	○	○	○	○	○	Nonframeshift	ENSSSCT00000024930	ENSSSCG00000023303	Exon 1	FIGNL1
10	157046	157046	Insertion	14	○	●	○	○	○	○	○	○	●	○	Frameshift	ENSSSCT00000011814	ENSSSCG00000010798	Exon 16	GGA2
10	10459388	10459388	Deletion	1	●	●	●	●	●	○	○	○	○	○	Frameshift	ENSSSCT00000011833	ENSSSCG00000010816	Exon 8	TGFB2
10	11194724	11194724	Insertion	1	○	○	○	○	○	○	○	●	○	○	Frameshift	ENSSSCT00000011835	ENSSSCG00000010818	Exon 4	MPHOSPH6
10	11195091	11195091	Insertion	2	●	●	○	●	●	○	○	○	○	○	Frameshift	ENSSSCT00000011835	ENSSSCG00000010818	Exon 1	MPHOSPH6
10	11695111	11695111	Insertion	1	●	●	●	●	●	○	●	○	●	○	Frameshift	ENSSSCT00000011838	ENSSSCG00000010821	Exon 16	EPRS
10	11695174	11695174	Insertion	1	●	●	●	●	●	○	●	○	●	○	Frameshift	ENSSSCT00000011838	ENSSSCG00000010821	Exon 15	EPRS
10	14058049	14058049	Deletion	1	●	●	●	○	●	○	○	○	●	●	Frameshift	ENSSSCT00000011865	ENSSSCG00000010844	Exon 2	CHML
10	14857504	14857504	Deletion	1	●	●	○	○	●	○	○	●	●	●	Frameshift	ENSSSCT00000030683	ENSSSCG00000028178	Exon 7	FH
10	14902272	14902272	Insertion	1	●	●	●	○	●	○	○	●	●	●	Frameshift	ENSSSCT00000032127	ENSSSCG00000025686	Exon 3	KMO
10	14936383	14936383	Insertion	3	●	○	○	○	●	○	○	○	○	○	Nonframeshift	ENSSSCT00000032127	ENSSSCG00000025686	Exon 17	KMO
10	17402491	17402491	Insertion	1	○	●	●	●	●	○	●	●	●	○	Frameshift	ENSSSCT00000011885	ENSSSCG00000010863	Exon 18	AHCTF1
10	20736252	20736254	Deletion	3	○	○	○	○	○	○	○	●	○	○	Nonframeshift	ENSSSCT00000026658	ENSSSCG00000010879	Exon 9	KIF26B
10	21887843	21887843	Deletion	1	●	●	○	●	●	●	●	●	○	●	Frameshift	ENSSSCT00000011909	ENSSSCG00000010885	Exon 1	TLR5
10	25181946	25181946	Insertion	2	○	●	●	●	●	●	○	●	○	○	Frameshift	ENSSSCT00000011926	ENSSSCG00000010900	Exon 10	DENND1B
10	27515371	27515371	Insertion	9	○	○	○	●	○	○	○	○	○	○	Nonframeshift	ENSSSCT00000011941	ENSSSCG00000010911	Exon 1	ZNF281
10	27515371	27515371	Insertion	6	○	○	●	○	●	○	○	○	○	●	Nonframeshift	ENSSSCT00000011941	ENSSSCG00000010911	Exon 1	ZNF281
10	27602211	27602219	Deletion	9	●	○	●	●	○	○	○	○	○	○	Nonframeshift	ENSSSCT00000011942	ENSSSCG00000010912	Exon 17	KIF14
10	28235788	28235793	Deletion	6	○	●	●	●	○	○	○	○	○	○	Nonframeshift	ENSSSCT00000024538	ENSSSCG00000029359	Exon 1	PHLDA3
10	28922105	28922105	Insertion	1	○	●	●	●	●	●	●	●	●	●	Frameshift	ENSSSCT00000011956	ENSSSCG00000010925	Exon 10	PPP1R12B
10	28922223	28922223	Insertion	1	○	●	●	●	●	●	●	●	●	●	Frameshift	ENSSSCT00000011956	ENSSSCG00000010925	Exon 12	PPP1R12B
10	35363584	35363584	Deletion	1	○	●	●	●	○	●	●	○	○	●	Frameshift	ENSSSCT00000027988	ENSSSCG00000021005	Exon 1	UBQLN1
10	36281201	36281201	Deletion	1	○	○	●	●	●	●	●	○	●	●	Frameshift	ENSSSCT00000012005	ENSSSCG00000010968	Exon 9	IL11RA
10	38188848	38188848	Insertion	1	○	○	●	○	●	●	●	○	●	●	Frameshift	ENSSSCT00000026775	ENSSSCG00000030408	Exon 19	DDX58
10	38188999	38188999	Insertion	1	○	○	●	○	●	●	●	○	●	●	Frameshift	ENSSSCT00000026775	ENSSSCG00000030408	Exon 20	DDX58
10	47620694	47620694	Insertion	4	○	○	○	○	○	●	○	○	○	○	Frameshift	ENSSSCT00000028808	ENSSSCG00000027616	Exon 3	ERV3-1
10	48856059	48856059	Insertion	1	○	○	○	○	○	●	●	●	●	○	Frameshift	ENSSSCT00000012082	ENSSSCG00000011038	Exon 1	MRC1
10	48868581	48868581	Deletion	1	○	○	○	○	○	○	○	●	○	○	Frameshift	ENSSSCT00000012082	ENSSSCG00000011038	Exon 4	MRC1
10	50828709	50828709	Deletion	1	○	●	●	●	●	●	○	○	●	●	Frameshift	ENSSSCT00000012090	ENSSSCG00000011046	Exon 1	ITGA8
10	51577452	51577452	Insertion	1	○	○	○	○	○	○	○	○	●	○	Frameshift	ENSSSCT00000012093	ENSSSCG00000011049	Exon 6	DCLRE1C
10	51577504	51577504	Insertion	1	●	●	●	●	●	●	○	●	●	●	Frameshift	ENSSSCT00000012093	ENSSSCG00000011049	Exon 7	DCLRE1C
10	53376515	53376515	Insertion	1	○	●	●	○	●	○	●	●	●	○	Frameshift	ENSSSCT00000026458	ENSSSCG00000021311	Exon 9	ARMC4
10	62789029	62789029	Insertion	1	●	●	○	●	●	●	●	○	●	○	Frameshift	ENSSSCT00000012150	ENSSSCG00000011103	Exon 8	PARD3
10	62789142	62789142	Insertion	1	●	●	○	●	●	●	●	○	●	○	Frameshift	ENSSSCT00000012150	ENSSSCG00000011103	Exon 8	PARD3
10	63683005	63683005	Deletion	1	○	○	●	●	○	○	○	○	○	○	Frameshift	ENSSSCT00000012156	ENSSSCG00000011108	Exon 4	GJD4
10	70590897	70590897	Insertion	1	●	○	●	●	●	●	○	○	○	○	Frameshift	ENSSSCT00000012183	ENSSSCG00000011131	Exon 10	PRKCQ
10	70592284	70592284	Deletion	1	○	○	○	○	○	●	○	○	○	○	Frameshift	ENSSSCT00000012183	ENSSSCG00000011131	Exon 11	PRKCQ
10	70595677	70595677	Insertion	2	○	●	○	●	○	●	○	●	○	○	Frameshift	ENSSSCT00000012183	ENSSSCG00000011131	Exon 14	PRKCQ
10	71185891	71185893	Deletion	3	○	●	○	○	○	●	●	●	○	○	Nonframeshift	ENSSSCT00000026184	ENSSSCG00000030030	Exon 15	FBXO18
10	71892799	71892799	Deletion	1	●	○	○	○	○	○	○	○	○	○	Frameshift	ENSSSCT00000012210	ENSSSCG00000011153	Exon 8	AKR1C1
11	3260491	3260491	Deletion	1	●	○	○	○	○	○	○	○	○	○	Frameshift	ENSSSCT00000028952	ENSSSCG00000023771	Exon 38	ATP8A2
11	3461342	3461342	Deletion	1	○	●	●	○	●	●	●	○	●	●	Frameshift	ENSSSCT00000024194	ENSSSCG00000024064	Exon 6	RNF6
11	3461795	3461795	Insertion	1	○	○	●	○	○	●	○	○	○	●	Frameshift	ENSSSCT00000024194	ENSSSCG00000024064	Exon 4	RNF6
11	4818808	4818808	Deletion	1	○	●	●	●	●	●	○	●	●	●	Frameshift	ENSSSCT00000010201	ENSSSCG00000009313	Exon 3	GSX1
11	8551866	8551868	Deletion	3	○	○	○	●	○	●	●	○	○	○	Nonframeshift	ENSSSCT00000010233	ENSSSCG00000009337	Exon 3
11	9432850	9432850	Deletion	1	●	●	○	●	●	●	●	○	○	●	Frameshift	ENSSSCT00000010245	ENSSSCG00000009348	Exon 15	STARD13
11	12778574	12778574	Deletion	1	○	○	●	○	○	○	○	○	○	○	Frameshift	ENSSSCT00000010255	ENSSSCG00000009358	Exon 6	EXOSC8
11	14002180	14002180	Insertion	1	●	●	●	●	●	●	●	●	●	●	Frameshift	ENSSSCT00000010261	ENSSSCG00000009364	Exon 2	FREM2
11	14262696	14262696	Insertion	1	○	○	●	○	○	○	○	○	●	○	Frameshift	ENSSSCT00000010264	ENSSSCG00000009367	Exon 26	PROSER1
11	14266256	14266256	Deletion	1	○	●	○	○	○	○	●	○	○	○	Stopgain	ENSSSCT00000010264	ENSSSCG00000009367	Exon 22	PROSER1
11	14266288	14266288	Insertion	1	○	○	○	○	○	○	●	○	○	○	Stopgain	ENSSSCT00000010264	ENSSSCG00000009367	Exon 22	PROSER1
11	16184776	16184776	Deletion	1	●	○	●	●	○	○	○	●	●	●	Frameshift	ENSSSCT00000010277	ENSSSCG00000009380	Exon 19	NEK5
11	16829629	16829631	Deletion	3	○	○	○	●	○	○	○	○	○	○	Nonframeshift	ENSSSCT00000010283	ENSSSCG00000009385	Exon 3	SERPINE3
11	17077786	17077786	Insertion	1	○	○	●	○	○	○	○	○	○	○	Frameshift	ENSSSCT00000010285	ENSSSCG00000009387	Exon 1	DLEU7
11	17094196	17094196	Insertion	3	○	●	●	●	●	○	○	○	●	●	Nonframeshift	ENSSSCT00000010285	ENSSSCG00000009387	Exon 2	DLEU7
11	17094234	17094234	Insertion	7	○	○	●	○	○	○	○	○	○	●	Frameshift	ENSSSCT00000010285	ENSSSCG00000009387	Exon 2	DLEU7
11	22262418	22262420	Deletion	3	○	○	○	○	●	○	○	○	○	○	Frameshift	ENSSSCT00000027352	ENSSSCG00000023738	Exon 9
11	24164720	24164720	Insertion	1	○	○	○	○	○	○	○	○	○	●	Frameshift	ENSSSCT00000022928	ENSSSCG00000021818	Exon 2	ENOX1
11	25503393	25503393	Insertion	3	○	○	●	○	●	○	○	●	○	○	Nonframeshift	ENSSSCT00000010338	ENSSSCG00000009431	Exon 25	DGKH
11	25504754	25504754	Insertion	1	●	○	○	○	○	○	○	○	○	○	Frameshift	ENSSSCT00000010338	ENSSSCG00000009431	Exon 24	DGKH
11	26384055	26384055	Insertion	3	●	●	●	●	●	○	●	○	○	○	Nonframeshift	ENSSSCT00000010347	ENSSSCG00000009440	Exon 8	ELF1
11	32002395	32002395	Deletion	1	●	●	○	●	●	●	●	●	●	●	Frameshift	ENSSSCT00000010354	ENSSSCG00000009446	Exon 1	PCDH17
11	32002434	32002434	Deletion	1	●	●	○	●	●	●	●	●	●	●	Frameshift	ENSSSCT00000010354	ENSSSCG00000009446	Exon 1	PCDH17
11	49487415	49487415	Deletion	1	●	○	○	○	○	○	○	○	○	○	Frameshift	ENSSSCT00000026633	ENSSSCG00000024722	Exon 4	PIBF1
11	69663193	69663195	Deletion	3	○	○	●	●	○	○	○	○	○	○	Nonframeshift	ENSSSCT00000010405	ENSSSCG00000009490	Exon 8	DCT
11	69967579	69967579	Insertion	1	○	●	○	○	○	○	○	●	○	○	Frameshift	ENSSSCT00000010410	ENSSSCG00000009494	Exon 4	SOX21
11	71572965	71572965	Insertion	4	○	○	○	○	○	○	○	●	●	○	Frameshift	ENSSSCT00000010416	ENSSSCG00000009499	Exon 4
11	71849675	71849675	Deletion	1	○	○	○	○	●	○	●	●	○	●	Frameshift	ENSSSCT00000010413	ENSSSCG00000027851	Exon 2
11	72092472	72092472	Insertion	1	○	○	○	○	○	○	○	●	○	○	Frameshift	ENSSSCT00000026790	ENSSSCG00000026082	Exon 1	DNAJC3
11	72144433	72144433	Insertion	1	●	●	○	●	●	○	●	●	●	●	Frameshift	ENSSSCT00000026790	ENSSSCG00000026082	Exon 5	DNAJC3
11	72425942	72425942	Insertion	1	○	○	●	○	○	○	○	○	○	○	Frameshift	ENSSSCT00000010420	ENSSSCG00000009503	Exon 3
11	74605078	74605078	Insertion	6	○	○	○	●	○	○	○	○	○	○	Nonframeshift	ENSSSCT00000026699	ENSSSCG00000026863	Exon 11	FARP1
11	75090700	75090700	Insertion	3	●	●	●	●	●	●	●	●	○	○	Nonframeshift	ENSSSCT00000027258	ENSSSCG00000022112	Exon 19	DOCK9
11	76092040	76092040	Insertion	1	○	●	●	●	●	●	●	●	●	●	Frameshift	ENSSSCT00000010439	ENSSSCG00000009521	Exon 4	ZIC5
11	76092293	76092293	Insertion	3	○	●	●	○	○	○	○	○	○	○	Nonframeshift	ENSSSCT00000010439	ENSSSCG00000009521	Exon 3	ZIC5
11	76093201	76093201	Insertion	1	○	●	●	●	●	●	●	●	●	●	Frameshift	ENSSSCT00000010439	ENSSSCG00000009521	Exon 2	ZIC5
11	76093244	76093244	Insertion	1	○	●	●	●	●	●	●	●	●	●	Frameshift	ENSSSCT00000010439	ENSSSCG00000009521	Exon 1	ZIC5
11	78361380	78361380	Insertion	2	●	●	●	●	●	○	○	○	○	○	Frameshift	ENSSSCT00000010448	ENSSSCG00000009530	Exon 3	CCDC168
11	82924322	82924322	Insertion	3	○	○	○	○	○	●	○	○	●	●	Nonframeshift	ENSSSCT00000010457	ENSSSCG00000009539	Exon 4	RPL5
11	82924893	82924893	Insertion	4	○	○	○	○	○	○	○	○	●	○	Frameshift	ENSSSCT00000010457	ENSSSCG00000009539	Exon 2	RPL5
11	85965087	85965088	Deletion	2	○	○	○	●	○	○	○	○	○	○	Frameshift	ENSSSCT00000010471	ENSSSCG00000009552	Exon 4
12	931759	931759	Insertion	1	○	○	○	○	●	○	○	●	○	○	Frameshift	ENSSSCT00000030531	ENSSSCG00000029553	Exon 3	CCDC57
12	964688	964688	Insertion	2	○	○	●	○	●	●	○	●	○	●	Frameshift	ENSSSCT00000031428	ENSSSCG00000024018	Exon 2	SLC16A3
12	1135898	1135898	Deletion	1	○	●	●	●	●	●	●	●	●	●	Frameshift	ENSSSCT00000022781	ENSSSCG00000029616	Exon 4	C17orf70
12	1135961	1135961	Deletion	1	○	●	●	●	●	●	●	●	●	●	Frameshift	ENSSSCT00000022781	ENSSSCG00000029616	Exon 4	C17orf70
12	1511420	1511431	Deletion	12	○	●	○	○	○	○	○	○	○	○	Nonframeshift	ENSSSCT00000023391	ENSSSCG00000017141	Exon 11	AATK
12	1511420	1511425	Deletion	6	○	○	○	●	○	○	○	○	○	●	Nonframeshift	ENSSSCT00000023391	ENSSSCG00000017141	Exon 11	AATK
12	2238424	2238425	Deletion	2	○	○	○	○	○	○	●	○	○	○	Frameshift	ENSSSCT00000018677	ENSSSCG00000017154	Exon 11	CARD14
12	2422068	2422068	Insertion	1	○	○	○	○	○	○	●	○	○	○	Frameshift	ENSSSCT00000018682	ENSSSCG00000017158	Exon 15	CCDC40
12	2632686	2632686	Insertion	6	○	●	○	○	○	○	○	○	●	○	Nonframeshift	ENSSSCT00000018685	ENSSSCG00000017161	Exon 5	CBX8
12	3391237	3391237	Deletion	1	○	●	●	●	●	●	●	○	○	○	Frameshift	ENSSSCT00000018690	ENSSSCG00000017166	Exon 6
12	4652833	4652833	Insertion	1	○	○	○	○	○	●	○	○	○	●	Frameshift	ENSSSCT00000025710	ENSSSCG00000023148	Exon 1	SRSF2
12	4998851	4998851	Deletion	1	○	●	○	○	○	○	○	○	○	○	Frameshift	ENSSSCT00000032146	ENSSSCG00000029901	Exon 1	UBE2O
12	4999303	4999303	Insertion	1	○	●	○	○	○	○	○	○	○	○	Frameshift	ENSSSCT00000032146	ENSSSCG00000029901	Exon 2	UBE2O
12	5601213	5601213	Insertion	1	○	●	●	●	●	●	○	○	○	○	Frameshift	ENSSSCT00000018729	ENSSSCG00000017204	Exon 32	ITGB4
12	6124977	6124977	Deletion	1	○	○	○	○	○	○	○	○	○	●	Frameshift	ENSSSCT00000027165	ENSSSCG00000028210	Exon 1	NT5C
12	6232286	6232292	Deletion	7	○	○	○	○	●	○	○	○	○	○	Frameshift	ENSSSCT00000018741	ENSSSCG00000017216	Exon 2
12	6389562	6389562	Insertion	9	○	○	○	●	○	○	○	○	○	○	Nonframeshift	ENSSSCT00000018756	ENSSSCG00000017229	Exon 17	GRIN2C
12	6726349	6726350	Deletion	2	○	○	○	○	●	○	○	○	○	○	Frameshift	ENSSSCT00000028588	ENSSSCG00000024098	Exon 4	GPR142
12	6738029	6738029	Insertion	1	○	○	●	●	●	○	●	○	○	○	Frameshift	ENSSSCT00000029381	ENSSSCG00000026789	Exon 1	BTBD17
12	8000991	8000991	Insertion	2	○	●	○	●	○	○	○	○	○	○	Frameshift	ENSSSCT00000018775	ENSSSCG00000017246	Exon 1	C17orf80
12	11647651	11647651	Deletion	1	●	○	○	○	○	○	○	○	○	○	Frameshift	ENSSSCT00000022503	ENSSSCG00000026094	Exon 1
12	12339285	12339285	Insertion	1	○	○	●	●	●	●	●	○	●	●	Frameshift	ENSSSCT00000018791	ENSSSCG00000017262	Exon 6	SLC16A6
12	12660671	12660671	Deletion	1	●	●	●	●	●	●	●	○	●	●	Frameshift	ENSSSCT00000018794	ENSSSCG00000017265	Exon 1	AXIN2
12	15009440	15009441	Deletion	2	○	○	○	○	○	●	○	○	○	○	Frameshift	ENSSSCT00000018814	ENSSSCG00000017282	Exon 4	SCN4A
12	15009440	15009443	Deletion	4	○	●	○	○	○	○	○	○	○	○	Frameshift	ENSSSCT00000018814	ENSSSCG00000017282	Exon 4	SCN4A
12	16622556	16622556	Insertion	1	○	○	●	○	○	○	○	○	○	○	Frameshift	ENSSSCT00000018841	ENSSSCG00000017305	Exon 20	EFCAB13
12	18570489	18570489	Insertion	1	○	○	○	●	●	○	○	●	○	●	Frameshift	ENSSSCT00000018875	ENSSSCG00000017339	Exon 4	NMT1
12	21827487	21827487	Insertion	3	○	●	○	●	○	○	●	○	○	○	Nonframeshift	ENSSSCT00000019009	ENSSSCG00000017461	Exon 3	KRT28
12	21958816	21958816	Insertion	1	○	●	○	●	○	●	●	○	○	○	Frameshift	ENSSSCT00000026513	ENSSSCG00000024067	Exon 1	KRT23
12	22350453	22350461	Deletion	9	●	○	●	●	○	○	○	○	○	○	Nonframeshift	ENSSSCT00000019025	ENSSSCG00000017474	Exon 2	GJD3
12	22891405	22891405	Deletion	1	○	○	○	○	●	○	○	○	○	○	Frameshift	ENSSSCT00000029526	ENSSSCG00000021018	Exon 7	GSDMB
12	22892413	22892423	Deletion	11	●	○	○	○	○	○	○	○	○	○	Frameshift	ENSSSCT00000029526	ENSSSCG00000021018	Exon 9	GSDMB
12	23035493	23035493	Insertion	1	○	○	○	●	○	○	○	○	○	○	Frameshift	ENSSSCT00000019048	ENSSSCG00000017495	Exon 5	GRB7
12	23586937	23586937	Insertion	1	○	○	○	○	○	●	●	●	●	●	Frameshift	ENSSSCT00000019064	ENSSSCG00000017511	Exon 12	PLXDC1
12	23994751	23994753	Deletion	3	○	○	○	○	○	○	○	○	●	○	Nonframeshift	ENSSSCT00000019077	ENSSSCG00000017523	Exon 2	PNPO
12	24053777	24053777	Insertion	1	●	●	○	●	●	●	●	●	●	●	Frameshift	ENSSSCT00000019078	ENSSSCG00000017524	Exon 12	CDK5RAP3
12	24054004	24054004	Deletion	1	○	○	○	●	○	○	○	○	○	○	Frameshift	ENSSSCT00000019078	ENSSSCG00000017524	Exon 13	CDK5RAP3
12	25078245	25078245	Deletion	1	○	●	○	●	●	●	●	●	●	●	Frameshift	ENSSSCT00000026961	ENSSSCG00000025638	Exon 1	UBE2Z
12	26994791	26994791	Insertion	1	○	○	○	○	○	○	○	○	●	●	Frameshift	ENSSSCT00000019117	ENSSSCG00000017562	Exon 5	CACNA1G
12	34990127	34990135	Deletion	9	○	○	○	○	○	○	●	○	○	○	Nonframeshift	ENSSSCT00000019186	ENSSSCG00000017624	Exon 1	CUEDC1
12	35870414	35870414	Insertion	3	○	○	●	○	○	○	○	○	○	○	Nonframeshift	ENSSSCT00000019208	ENSSSCG00000017645	Exon 12	TEX14
12	36226155	36226157	Deletion	3	○	○	○	○	●	○	○	○	○	○	Nonframeshift	ENSSSCT00000035413	ENSSSCG00000017638	Exon 21	BZRAP1
12	37867789	37867789	Deletion	1	○	○	○	●	○	○	○	○	○	○	Stoploss	ENSSSCT00000019237	ENSSSCG00000017673	Exon 25	INTS2
12	40328500	40328500	Insertion	1	○	○	○	○	○	○	○	○	○	●	Frameshift	ENSSSCT00000019259	ENSSSCG00000017694	Exon 25	ACACA
12	40346176	40346176	Insertion	1	○	●	○	○	●	●	○	●	●	●	Frameshift	ENSSSCT00000019259	ENSSSCG00000017694	Exon 11	ACACA
12	41461699	41461699	Insertion	1	○	○	○	○	○	○	○	○	○	●	Frameshift	ENSSSCT00000026767	ENSSSCG00000024115	Exon 1	SLFN13
12	46915407	46915407	Insertion	1	●	●	●	●	○	○	●	●	●	●	Frameshift	ENSSSCT00000019345	ENSSSCG00000017773	Exon 25	SUPT6H
12	46958329	46958329	Insertion	1	○	○	●	○	○	○	○	○	○	○	Frameshift	ENSSSCT00000019338	ENSSSCG00000017766	Exon 12	NEK8
12	47358046	47358046	Insertion	1	○	●	●	●	○	○	●	●	●	●	Frameshift	ENSSSCT00000031055	ENSSSCG00000030110	Exon 7	MYO18A
12	47720567	47720567	Insertion	1	○	●	●	●	○	○	●	●	●	●	Frameshift	ENSSSCT00000019359	ENSSSCG00000017787	Exon 20	GIT1
12	49930493	49930493	Insertion	1	○	●	○	○	○	○	○	○	○	○	Frameshift	ENSSSCT00000019398	ENSSSCG00000017823	Exon 1	RTN4RL1
12	50273073	50273074	Deletion	2	○	●	○	○	○	○	○	○	○	○	Frameshift	ENSSSCT00000019407	ENSSSCG00000017832	Exon 11	METTL16
12	52493713	52493713	Insertion	3	○	●	●	●	●	○	●	●	○	○	Nonframeshift	ENSSSCT00000019459	ENSSSCG00000017882	Exon 20	MYBBP1A
12	52495261	52495261	Insertion	3	○	○	○	○	○	●	○	○	○	○	Nonframeshift	ENSSSCT00000019459	ENSSSCG00000017882	Exon 18	MYBBP1A
12	53029412	53029412	Insertion	4	○	○	○	○	○	○	○	○	○	●	Frameshift	ENSSSCT00000027360	ENSSSCG00000029355	Exon 1
12	53029412	53029412	Insertion	14	○	○	○	○	○	○	○	●	○	○	Frameshift	ENSSSCT00000027360	ENSSSCG00000029355	Exon 1
12	53783926	53783926	Insertion	1	○	○	○	○	○	●	○	○	○	●	Frameshift	ENSSSCT00000019477	ENSSSCG00000017897	Exon 3
12	54092053	54092061	Deletion	9	●	○	○	○	○	○	○	○	○	○	Nonframeshift	ENSSSCT00000019491	ENSSSCG00000017917	Exon 13	MINK1
12	56668124	56668124	Insertion	3	○	●	○	●	●	○	●	●	●	●	Nonframeshift	ENSSSCT00000019577	ENSSSCG00000017990	Exon 18	PIK3R6
12	57455775	57455775	Insertion	1	○	●	●	●	●	●	●	●	●	●	Frameshift	ENSSSCT00000019587	ENSSSCG00000017998	Exon 5	GLP2R
12	57891011	57891011	Insertion	1	○	●	●	●	●	●	●	●	●	●	Frameshift	ENSSSCT00000019595	ENSSSCG00000024416	Exon 29	MYH13
12	57925014	57925014	Insertion	1	○	○	○	○	○	○	●	●	●	●	Frameshift	ENSSSCT00000019595	ENSSSCG00000024416	Exon 8	MYH13
12	62221699	62221699	Insertion	6	○	○	○	○	○	○	○	○	○	●	Nonframeshift	ENSSSCT00000029947	ENSSSCG00000021252	Exon 1	LRRC75A
12	62270600	62270600	Insertion	1	○	○	○	○	●	○	●	○	○	○	Frameshift	ENSSSCT00000019627	ENSSSCG00000018032	Exon 6	TRPV2
13	1403198	1403198	Insertion	1	●	●	●	○	○	●	○	●	●	○	Frameshift	ENSSSCT00000025472	ENSSSCG00000029094	Exon 3	PIK3R4
13	2512366	2512371	Deletion	6	●	○	○	●	●	○	○	○	○	○	Nonframeshift	ENSSSCT00000032548	ENSSSCG00000024938	Exon 1	SH3BP5
13	2644399	2644399	Deletion	1	●	●	●	○	●	●	○	●	●	○	Frameshift	ENSSSCT00000024153	ENSSSCG00000028911	Exon 5	COLQ
13	2644462	2644462	Deletion	1	●	●	●	○	●	●	○	●	●	○	Frameshift	ENSSSCT00000024153	ENSSSCG00000028911	Exon 5	COLQ
13	14129184	14129184	Deletion	1	○	○	●	○	○	●	●	●	○	○	Frameshift	ENSSSCT00000012279	ENSSSCG00000011213	Exon 32	TOP2B
13	15550021	15550021	Insertion	1	●	●	○	●	○	●	○	○	○	○	Frameshift	ENSSSCT00000012285	ENSSSCG00000011218	Exon 1	SLC4A7
13	24816090	24816104	Deletion	15	○	○	●	○	○	○	○	○	○	○	Nonframeshift	ENSSSCT00000029088	ENSSSCG00000022651	Exon 1	DLEC1
13	25663933	25663933	Insertion	14	○	○	○	○	●	○	○	○	○	○	Frameshift	ENSSSCT00000012328	ENSSSCG00000011260	Exon 28	SCN10A
13	25664767	25664767	Insertion	4	○	○	●	○	○	○	○	○	○	○	Frameshift	ENSSSCT00000012328	ENSSSCG00000011260	Exon 26	SCN10A
13	26088342	26088342	Insertion	1	○	○	○	●	○	○	○	●	●	○	Frameshift	ENSSSCT00000022750	ENSSSCG00000011263	Exon 26	TTC21A
13	27153139	27153139	Insertion	13	○	○	○	●	○	○	○	○	○	●	Frameshift	ENSSSCT00000031654	ENSSSCG00000026550	Exon 4	ZNF621
13	28317292	28317294	Deletion	3	○	○	○	●	○	○	○	●	●	○	Nonframeshift	ENSSSCT00000025015	ENSSSCG00000026128	Exon 2	ULK4
13	30804879	30804879	Deletion	1	○	○	●	●	●	○	●	●	●	○	Frameshift	ENSSSCT00000012379	ENSSSCG00000011308	Exon 2	KIAA1143
13	32216248	32216248	Insertion	1	○	○	●	○	●	●	●	○	●	○	Frameshift	ENSSSCT00000012390	ENSSSCG00000011317	Exon 9	FYCO1
13	32934410	32934411	Deletion	2	○	●	○	○	○	○	○	○	○	○	Frameshift	ENSSSCT00000024475	ENSSSCG00000022834	Exon 9	PRSS45
13	33133654	33133654	Insertion	1	○	●	●	○	○	○	○	○	●	●	Frameshift	ENSSSCT00000012407	ENSSSCG00000011331	Exon 8
13	33212594	33212594	Deletion	1	●	●	●	○	●	●	○	○	●	●	Frameshift	ENSSSCT00000012409	ENSSSCG00000011332	Exon 11	SETD2
13	33360757	33360757	Insertion	1	○	●	●	○	●	●	○	○	●	●	Frameshift	ENSSSCT00000027575	ENSSSCG00000024513	Exon 2	KLHL18
13	33360799	33360799	Deletion	1	●	●	●	○	●	●	○	○	●	●	Frameshift	ENSSSCT00000027575	ENSSSCG00000024513	Exon 3	KLHL18
13	33743298	33743305	Deletion	8	○	○	○	○	●	○	○	○	○	○	Frameshift	ENSSSCT00000012417	ENSSSCG00000011340	Exon 30	SMARCC1
13	34509597	34509597	Deletion	1	●	○	●	●	●	●	●	○	○	○	Frameshift	ENSSSCT00000012432	ENSSSCG00000011355	Exon 112	COL7A1
13	34891523	34891523	Insertion	1	○	●	●	●	●	●	●	○	○	○	Frameshift	ENSSSCT00000012447	ENSSSCG00000011369	Exon 2	WDR6
13	34891558	34891558	Insertion	1	○	○	○	○	○	○	○	○	●	○	Frameshift	ENSSSCT00000012447	ENSSSCG00000011369	Exon 3	WDR6
13	34972566	34972566	Deletion	1	●	●	●	●	●	●	●	●	●	○	Frameshift	ENSSSCT00000012455	ENSSSCG00000011377	Exon 24	LAMB2
13	35374329	35374334	Deletion	6	●	●	●	●	●	○	○	○	○	○	Nonframeshift	ENSSSCT00000012462	ENSSSCG00000011384	Exon 5	BSN
13	35977853	35977853	Insertion	1	○	●	●	●	●	●	●	●	●	●	Frameshift	ENSSSCT00000012484	ENSSSCG00000011404	Exon 1	HYAL1
13	36005339	36005339	Insertion	1	○	●	●	●	●	●	●	●	●	●	Frameshift	ENSSSCT00000012488	ENSSSCG00000011408	Exon 7	ZMYND10
13	36039799	36039799	Insertion	1	●	●	●	●	●	●	●	●	●	●	Frameshift	ENSSSCT00000012492	ENSSSCG00000011412	Exon 10	CACNA2D2
13	37401082	37401082	Deletion	1	○	●	○	○	●	●	●	○	○	●	Frameshift	ENSSSCT00000012510	ENSSSCG00000011430	Exon 2	DUSP7
13	37732129	37732129	Insertion	1	○	●	●	●	●	●	●	●	○	●	Frameshift	ENSSSCT00000025398	ENSSSCG00000028184	Exon 38	DNAH1
13	37756625	37756625	Insertion	1	○	●	●	●	●	●	●	●	○	●	Frameshift	ENSSSCT00000025398	ENSSSCG00000028184	Exon 75	DNAH1
13	38065729	38065729	Deletion	1	○	●	●	●	●	●	●	●	○	●	Frameshift	ENSSSCT00000012526	ENSSSCG00000011446	Exon 11	NEK4
13	38119005	38119005	Insertion	3	○	●	●	●	●	●	●	●	○	●	Nonframeshift	ENSSSCT00000012532	ENSSSCG00000011451	Exon 21	ITIH3
13	38247854	38247854	Deletion	1	○	●	○	○	○	○	○	○	○	●	Frameshift	ENSSSCT00000012535	ENSSSCG00000011454	Exon 4	SFMBT1
13	38387068	38387068	Deletion	1	○	●	○	●	●	●	●	●	○	●	Frameshift	ENSSSCT00000026074	ENSSSCG00000023503	Exon 16	PRKCD
13	47552399	47552399	Insertion	1	●	○	●	○	●	●	○	●	●	●	Frameshift	ENSSSCT00000030267	ENSSSCG00000024705	Exon 1
13	47567512	47567512	Deletion	1	●	○	●	○	●	●	○	●	●	●	Frameshift	ENSSSCT00000030267	ENSSSCG00000024705	Exon 3
13	49800489	49800489	Deletion	1	●	○	○	●	●	○	●	○	●	○	Frameshift	ENSSSCT00000012573	ENSSSCG00000011490	Exon 1	C3orf49
13	56597777	56597780	Deletion	4	○	○	○	○	○	○	○	●	○	○	Frameshift	ENSSSCT00000025535	ENSSSCG00000011514	Exon 4
13	56597777	56597778	Deletion	2	○	○	●	●	○	○	○	○	○	○	Frameshift	ENSSSCT00000025535	ENSSSCG00000011514	Exon 4
13	56597777	56597779	Deletion	3	○	○	○	○	○	●	○	○	○	○	Nonframeshift	ENSSSCT00000025535	ENSSSCG00000011514	Exon 4
13	73351650	73351650	Insertion	1	●	●	●	●	●	○	●	○	●	●	Frameshift	ENSSSCT00000012655	ENSSSCG00000011563	Exon 22	FANCD2
13	73351680	73351680	Deletion	1	●	●	●	●	●	○	●	○	●	●	Frameshift	ENSSSCT00000012655	ENSSSCG00000011563	Exon 22	FANCD2
13	76270017	76270017	Insertion	1	○	●	○	○	●	○	●	○	○	○	Frameshift	ENSSSCT00000012689	ENSSSCG00000011593	Exon 4	TMCC1
13	77913170	77913170	Deletion	1	○	●	○	○	○	○	○	○	○	●	Frameshift	ENSSSCT00000029545	ENSSSCG00000025926	Exon 1
13	77913170	77913171	Deletion	2	○	○	●	●	○	○	○	○	○	○	Frameshift	ENSSSCT00000029545	ENSSSCG00000025926	Exon 1
13	80336066	80336066	Insertion	1	○	●	○	●	○	○	○	○	○	○	Frameshift	ENSSSCT00000030214	ENSSSCG00000026112	Exon 1	C3orf56
13	81270332	81270332	Insertion	1	●	●	●	●	●	●	●	○	○	●	Frameshift	ENSSSCT00000012725	ENSSSCG00000011628	Exon 54	DNAJC13
13	82496565	82496565	Insertion	1	●	●	●	●	○	●	●	●	●	●	Frameshift	ENSSSCT00000012739	ENSSSCG00000011639	Exon 6	SRPRB
13	86233383	86233383	Insertion	1	○	○	●	●	○	○	○	○	○	○	Frameshift	ENSSSCT00000012760	ENSSSCG00000011656	Exon 2	SOX14
13	90168631	90168631	Insertion	5	○	●	●	○	●	○	●	●	○	○	Frameshift	ENSSSCT00000012777	ENSSSCG00000011672	Exon 15	RASA2
13	90755762	90755762	Deletion	1	●	●	●	●	○	●	○	●	●	●	Frameshift	ENSSSCT00000012783	ENSSSCG00000011677	Exon 17	GK5
13	91290829	91290829	Insertion	1	○	○	○	○	○	○	○	○	●	○	Frameshift	ENSSSCT00000012791	ENSSSCG00000011683	Exon 10	PCOLCE2
13	92373205	92373205	Insertion	1	●	●	○	○	○	○	●	●	●	●	Frameshift	ENSSSCT00000012795	ENSSSCG00000011687	Exon 4	C3orf58
13	92373216	92373216	Insertion	1	●	●	○	○	○	○	●	●	●	●	Frameshift	ENSSSCT00000012795	ENSSSCG00000011687	Exon 3	C3orf58
13	94178312	94178312	Deletion	1	●	●	●	○	●	●	○	●	●	●	Frameshift	ENSSSCT00000012797	ENSSSCG00000011689	Exon 14	PLOD2
13	98237599	98237599	Insertion	6	○	○	○	○	○	○	○	○	○	●	Nonframeshift	ENSSSCT00000025236	ENSSSCG00000030260	Exon 1	PFN2
13	108426266	108426268	Deletion	3	○	○	○	○	○	○	○	○	●	○	Nonframeshift	ENSSSCT00000033919	ENSSSCG00000011732	Exon 1	TRIM59
13	112806560	112806560	Insertion	3	●	○	●	○	○	○	○	○	○	○	Nonframeshift	ENSSSCT00000012846	ENSSSCG00000011735	Exon 3	SI
13	131278032	131278032	Insertion	1	○	○	○	●	●	●	●	○	●	○	Frameshift	ENSSSCT00000012892	ENSSSCG00000011780	Exon 6
13	131426743	131426743	Insertion	7	○	●	○	●	○	○	○	○	○	○	Frameshift	ENSSSCT00000026516	ENSSSCG00000024689	Exon 9	HTR3C
13	140011392	140011392	Insertion	1	●	○	●	●	●	●	○	●	●	○	Frameshift	ENSSSCT00000012933	ENSSSCG00000011821	Exon 16	ATP13A4
13	141951914	141951914	Deletion	1	○	○	○	○	○	●	●	●	●	○	Frameshift	ENSSSCT00000028570	ENSSSCG00000027209	Exon 12	ACAP2
13	142050928	142050928	Insertion	1	○	○	○	●	○	○	○	○	○	○	Frameshift	ENSSSCT00000012942	ENSSSCG00000011830	Exon 1	PPP1R2
13	142739402	142739402	Insertion	1	○	●	○	●	●	●	○	●	●	●	Frameshift	ENSSSCT00000012949	ENSSSCG00000011837	Exon 8	MFI2
13	142815437	142815439	Deletion	3	○	●	○	○	○	○	○	○	○	○	Nonframeshift	ENSSSCT00000012953	ENSSSCG00000011841	Exon 1	SENP5
13	144135039	144135039	Insertion	3	○	○	●	○	○	○	○	●	○	●	Nonframeshift	ENSSSCT00000012968	ENSSSCG00000011855	Exon 9	IQCG
13	145266005	145266005	Deletion	1	●	○	●	○	●	●	○	○	○	○	Frameshift	ENSSSCT00000023434	ENSSSCG00000021656	Exon 41	KALRN
13	146740596	146740596	Insertion	1	○	●	○	○	○	○	○	○	○	○	Frameshift	ENSSSCT00000023567	ENSSSCG00000024904	Exon 1	SEC22A
13	147464257	147464257	Insertion	6	○	○	●	●	○	○	○	○	○	○	Nonframeshift	ENSSSCT00000012988	ENSSSCG00000011874	Exon 6	PARP14
13	156512624	156512624	Insertion	3	●	○	○	●	○	○	○	○	○	○	Nonframeshift	ENSSSCT00000013047	ENSSSCG00000011923	Exon 8	C3orf17
13	156760950	156760954	Deletion	5	○	○	○	●	○	○	○	○	○	○	Frameshift	ENSSSCT00000013051	ENSSSCG00000011927	Exon 1	UBE2B
13	156875708	156875708	Insertion	3	●	○	○	○	○	○	○	○	○	○	Nonframeshift	ENSSSCT00000013053	ENSSSCG00000011929	Exon 1	SLC35A5
13	159767034	159767034	Insertion	3	○	●	○	○	○	○	○	○	○	○	Nonframeshift	ENSSSCT00000013063	ENSSSCG00000023842	Exon 5	TRAT1
13	160193290	160193290	Deletion	1	○	○	●	○	○	○	○	○	○	○	Frameshift	ENSSSCT00000027252	ENSSSCG00000022175	Exon 30
13	167801865	167801872	Deletion	8	○	○	○	○	○	○	●	○	○	○	Frameshift	ENSSSCT00000013085	ENSSSCG00000011959	Exon 20	ABI3BP
13	170277937	170277937	Deletion	1	●	○	○	○	○	○	○	○	○	○	Frameshift	ENSSSCT00000022679	ENSSSCG00000026236	Exon 2
13	184112959	184112959	Insertion	1	○	○	●	●	●	●	○	●	●	●	Frameshift	ENSSSCT00000013131	ENSSSCG00000012000	Exon 7	GBE1
13	189529446	189529446	Insertion	1	●	●	●	○	●	●	●	○	●	●	Frameshift	ENSSSCT00000013137	ENSSSCG00000012006	Exon 20	ABCC2
13	189546274	189546274	Insertion	1	○	○	○	○	○	○	○	○	●	○	Frameshift	ENSSSCT00000013137	ENSSSCG00000012006	Exon 29	ABCC2
13	195354775	195354775	Insertion	1	○	○	○	○	○	○	●	○	○	○	Frameshift	ENSSSCT00000013151	ENSSSCG00000012020	Exon 10	NCAM2
13	200135276	200135276	Insertion	3	○	○	○	○	●	○	○	○	○	○	Nonframeshift	ENSSSCT00000013158	ENSSSCG00000012026	Exon 2	ADAMTS1
13	200135707	200135707	Insertion	1	○	●	●	●	●	○	●	●	○	○	Frameshift	ENSSSCT00000013158	ENSSSCG00000012026	Exon 1	ADAMTS1
13	205659558	205659558	Insertion	6	○	○	○	○	○	○	○	○	●	○	Nonframeshift	ENSSSCT00000030551	ENSSSCG00000021023	Exon 8	SCAF4
13	205659559	205659561	Deletion	3	○	●	●	●	●	○	○	○	○	○	Nonframeshift	ENSSSCT00000030551	ENSSSCG00000021023	Exon 8	SCAF4
13	205659638	205659638	Insertion	3	○	○	○	○	●	○	○	○	○	○	Nonframeshift	ENSSSCT00000030551	ENSSSCG00000021023	Exon 8	SCAF4
13	205994695	205994695	Insertion	1	○	○	○	○	●	○	○	○	○	○	Frameshift	ENSSSCT00000026584	ENSSSCG00000029392	Exon 5	HUNK
13	206922792	206922792	Insertion	1	●	●	○	○	●	●	●	●	●	○	Frameshift	ENSSSCT00000024359	ENSSSCG00000028192	Exon 1	DNAJC28
13	210785868	210785868	Insertion	1	●	●	●	●	●	●	●	●	●	●	Frameshift	ENSSSCT00000013194	ENSSSCG00000012062	Exon 5	TTC3
13	211406585	211406585	Insertion	1	○	●	●	●	○	○	○	●	○	○	Frameshift	ENSSSCT00000027066	ENSSSCG00000027965	Exon 2
13	212908601	212908603	Deletion	3	●	●	●	●	○	○	●	●	●	●	Nonframeshift	ENSSSCT00000023379	ENSSSCG00000030314	Exon 5	PSMG1
13	213727167	213727167	Insertion	1	○	●	●	○	●	○	○	●	●	●	Frameshift	ENSSSCT00000013204	ENSSSCG00000012072	Exon 18	DSCAM
13	215686085	215686085	Deletion	1	○	○	○	○	○	○	○	○	●	○	Frameshift	ENSSSCT00000025689	ENSSSCG00000027786	Exon 1	ZBTB21
13	215952092	215952092	Deletion	1	○	●	●	●	●	○	●	●	●	●	Frameshift	ENSSSCT00000028391	ENSSSCG00000027745	Exon 9	ABCG1
13	216487023	216487023	Insertion	1	○	○	●	○	○	○	○	○	○	○	Frameshift	ENSSSCT00000025612	ENSSSCG00000026075	Exon 1
13	216488138	216488138	Insertion	1	○	○	●	○	○	○	○	○	○	○	Frameshift	ENSSSCT00000025612	ENSSSCG00000026075	Exon 2
13	216491452	216491460	Deletion	9	○	○	●	○	○	○	○	○	○	○	Nonframeshift	ENSSSCT00000025612	ENSSSCG00000026075	Exon 4
13	217031259	217031259	Insertion	3	○	○	●	○	○	○	●	○	○	○	Nonframeshift	ENSSSCT00000030488	ENSSSCG00000025294	Exon 6	AIRE
13	217086392	217086392	Insertion	1	○	○	●	○	○	○	○	○	○	○	Frameshift	ENSSSCT00000030758	ENSSSCG00000023810	Exon 1
13	217648008	217648008	Insertion	1	○	●	○	○	○	●	●	●	●	○	Frameshift	ENSSSCT00000013223	ENSSSCG00000012089	Exon 2
13	218086445	218086445	Insertion	1	○	●	●	●	●	○	○	●	○	●	Frameshift	ENSSSCT00000027402	ENSSSCG00000028846	Exon 1	COL18A1
14	1176780	1176780	Deletion	1	○	●	●	●	●	●	●	●	●	●	Frameshift	ENSSSCT00000033039	ENSSSCG00000009584	Exon 15	SEMA4D
14	6418551	6418551	Insertion	1	○	○	○	○	●	●	●	○	●	○	Frameshift	ENSSSCT00000032031	ENSSSCG00000023463	Exon 2	GFRA2
14	6744038	6744040	Deletion	3	○	●	○	○	○	○	○	○	○	○	Nonframeshift	ENSSSCT00000010533	ENSSSCG00000009610	Exon 5	NPM2
14	7335991	7335991	Insertion	1	○	○	●	●	●	○	●	●	●	●	Frameshift	ENSSSCT00000010553	ENSSSCG00000009627	Exon 5	C8orf58
14	8655478	8655478	Insertion	3	○	○	○	○	○	○	○	○	●	○	Nonframeshift	ENSSSCT00000023530	ENSSSCG00000028064	Exon 6	NKX2-6
14	8655479	8655479	Insertion	3	○	○	●	○	○	○	○	○	○	○	Nonframeshift	ENSSSCT00000023530	ENSSSCG00000028064	Exon 6	NKX2-6
14	9525694	9525694	Insertion	2	○	●	●	○	●	●	○	○	●	●	Frameshift	ENSSSCT00000010574	ENSSSCG00000009646	Exon 2	ADAM7
14	13309107	13309107	Insertion	1	○	●	○	●	○	●	○	○	○	○	Frameshift	ENSSSCT00000010610	ENSSSCG00000009676	Exon 1	ZNF395
14	15091999	15091999	Deletion	1	○	○	●	○	○	○	○	○	○	●	Frameshift	ENSSSCT00000010620	ENSSSCG00000009685	Exon 2
14	15092020	15092020	Deletion	1	●	○	○	○	○	●	○	○	○	○	Frameshift	ENSSSCT00000010620	ENSSSCG00000009685	Exon 2
14	15092021	15092021	Deletion	1	○	○	●	○	○	○	○	○	○	●	Frameshift	ENSSSCT00000010620	ENSSSCG00000009685	Exon 2
14	15178623	15178625	Deletion	3	○	○	●	○	○	●	○	○	○	○	Nonframeshift	ENSSSCT00000031180	ENSSSCG00000028713	Exon 6	RP1L1
14	15180089	15180089	Insertion	6	○	○	●	○	●	●	○	○	○	●	Nonframeshift	ENSSSCT00000031180	ENSSSCG00000028713	Exon 6	RP1L1
14	17861136	17861136	Deletion	1	○	○	○	○	○	○	○	●	○	○	Frameshift	ENSSSCT00000010639	ENSSSCG00000009704	Exon 3	HMGB2
14	21320944	21320944	Insertion	1	●	○	○	○	○	○	○	○	○	○	Frameshift	ENSSSCT00000010647	ENSSSCG00000009711	Exon 6	C4orf27
14	21334538	21334538	Insertion	6	○	●	○	○	○	○	○	○	○	○	Nonframeshift	ENSSSCT00000010649	ENSSSCG00000009713	Exon 13	CLCN3
14	21334538	21334538	Insertion	12	○	○	●	●	●	○	○	○	●	○	Nonframeshift	ENSSSCT00000010649	ENSSSCG00000009713	Exon 13	CLCN3
14	21828640	21828640	Deletion	1	○	○	○	●	●	●	○	○	○	●	Frameshift	ENSSSCT00000010652	ENSSSCG00000009716	Exon 7	SH3RF1
14	22337956	22337956	Insertion	5	●	○	●	○	○	○	○	○	○	○	Frameshift	ENSSSCT00000010657	ENSSSCG00000009720	Exon 16	DDX60
14	22361187	22361187	Insertion	1	●	○	●	○	○	○	○	○	○	○	Frameshift	ENSSSCT00000010657	ENSSSCG00000009720	Exon 4	DDX60
14	24356887	24356892	Deletion	6	○	●	○	○	○	○	○	○	○	○	Nonframeshift	ENSSSCT00000031798	ENSSSCG00000023569	Exon 21	FBRSL1
14	26237911	26237911	Insertion	4	●	●	●	●	●	○	○	○	○	○	Frameshift	ENSSSCT00000010687	ENSSSCG00000009748	Exon 34	RIMBP2
14	26252917	26252917	Insertion	1	○	●	●	●	●	●	○	○	○	●	Frameshift	ENSSSCT00000010687	ENSSSCG00000009748	Exon 16	RIMBP2
14	26269906	26269906	Insertion	1	○	○	○	○	○	●	○	○	○	○	Frameshift	ENSSSCT00000010687	ENSSSCG00000009748	Exon 7	RIMBP2
14	29904544	29904555	Deletion	12	●	●	●	○	●	●	●	●	●	●	Nonframeshift	ENSSSCT00000010697	ENSSSCG00000009757	Exon 1	BRI3BP
14	29912081	29912081	Deletion	1	●	●	●	○	●	●	●	●	●	●	Stopgain	ENSSSCT00000010698	ENSSSCG00000009758	Exon 4	DHX37
14	29943435	29943435	Insertion	1	○	●	●	○	●	●	●	●	●	●	Frameshift	ENSSSCT00000010698	ENSSSCG00000009758	Exon 39	DHX37
14	30529404	30529404	Insertion	5	●	○	○	○	●	●	○	○	○	○	Frameshift	ENSSSCT00000022364	ENSSSCG00000020756	Exon 2	FAM101A
14	30529410	30529410	Insertion	5	○	○	○	○	○	○	○	○	●	○	Frameshift	ENSSSCT00000022364	ENSSSCG00000020756	Exon 2	FAM101A
14	30911551	30911551	Insertion	1	●	●	○	○	○	○	○	○	○	○	Frameshift	ENSSSCT00000010707	ENSSSCG00000009765	Exon 15	DNAH10
14	31362379	31362379	Deletion	1	●	●	●	●	●	●	●	●	○	●	Frameshift	ENSSSCT00000025142	ENSSSCG00000009779	Exon 1	MPHOSPH9
14	31362406	31362406	Insertion	1	●	●	●	●	●	●	●	●	○	●	Frameshift	ENSSSCT00000025142	ENSSSCG00000009779	Exon 2	MPHOSPH9
14	31713008	31713010	Deletion	3	○	●	●	○	○	○	○	○	○	○	Nonframeshift	ENSSSCT00000010728	ENSSSCG00000009786	Exon 1	HIP1R
14	32561413	32561413	Insertion	1	●	●	○	○	●	●	●	●	○	●	Frameshift	ENSSSCT00000010744	ENSSSCG00000009802	Exon 13	WDR66
14	32561551	32561551	Insertion	1	●	●	○	○	●	●	●	●	○	●	Frameshift	ENSSSCT00000010744	ENSSSCG00000009802	Exon 12	WDR66
14	32676266	32676266	Insertion	1	○	●	○	●	●	●	●	●	○	●	Frameshift	ENSSSCT00000010749	ENSSSCG00000009806	Exon 13	SETD1B
14	32676296	32676296	Deletion	1	○	○	○	●	●	○	○	○	○	●	Frameshift	ENSSSCT00000010749	ENSSSCG00000009806	Exon 13	SETD1B
14	32676333	32676333	Insertion	1	○	●	○	●	●	●	●	●	○	●	Frameshift	ENSSSCT00000010749	ENSSSCG00000009806	Exon 13	SETD1B
14	32676440	32676440	Insertion	1	○	●	○	●	●	●	●	●	○	●	Frameshift	ENSSSCT00000010749	ENSSSCG00000009806	Exon 11	SETD1B
14	33825558	33825558	Insertion	3	●	○	●	○	○	○	○	○	○	●	Nonframeshift	ENSSSCT00000027736	ENSSSCG00000009824	Exon 13	RAD9B
14	33825560	33825560	Insertion	3	○	○	○	○	○	●	○	●	○	○	Nonframeshift	ENSSSCT00000027736	ENSSSCG00000009824	Exon 13	RAD9B
14	33868247	33868247	Insertion	1	○	○	○	○	○	○	○	●	○	○	Frameshift	ENSSSCT00000010768	ENSSSCG00000009825	Exon 2	PPTC7
14	34001395	34001395	Insertion	1	●	○	●	●	○	○	●	●	○	●	Frameshift	ENSSSCT00000010772	ENSSSCG00000009828	Exon 5	PPP1CC
14	34001469	34001469	Insertion	1	●	○	●	●	○	○	●	●	○	●	Frameshift	ENSSSCT00000010772	ENSSSCG00000009828	Exon 4	PPP1CC
14	34103361	34103361	Insertion	1	○	○	●	●	○	○	○	○	●	●	Frameshift	ENSSSCT00000010773	ENSSSCG00000009829	Exon 5	CCDC63
14	35050951	35050951	Insertion	1	○	○	●	●	●	●	●	●	●	●	Frameshift	ENSSSCT00000010783	ENSSSCG00000009839	Exon 3
14	35564628	35564628	Deletion	1	○	○	○	○	○	○	○	○	●	○	Frameshift	ENSSSCT00000010791	ENSSSCG00000009845	Exon 11	SRRM4
14	41131893	41131893	Insertion	3	○	○	●	○	○	○	○	○	○	○	Nonframeshift	ENSSSCT00000010826	ENSSSCG00000009877	Exon 4	IQCD
14	41197887	41197887	Deletion	1	○	○	●	○	○	○	○	○	●	○	Frameshift	ENSSSCT00000010831	ENSSSCG00000009881	Exon 3	OAS2
14	41316548	41316548	Insertion	1	○	○	○	●	○	○	○	○	○	○	Stoploss	ENSSSCT00000010833	ENSSSCG00000009883	Exon 20	RPH3A
14	42065053	42065055	Deletion	3	○	○	○	○	○	●	○	○	○	○	Nonframeshift	ENSSSCT00000036207	ENSSSCG00000009886	Exon 3	TRAFD1
14	43401543	43401545	Deletion	3	○	○	○	○	○	○	○	●	○	●	Nonframeshift	ENSSSCT00000010869	ENSSSCG00000009919	Exon 10	HNF1A
14	44326981	44326981	Insertion	1	○	●	●	○	●	●	○	●	●	●	Frameshift	ENSSSCT00000031570	ENSSSCG00000026053	Exon 1	ALKBH2
14	44327034	44327034	Insertion	1	○	○	●	○	○	○	○	○	○	○	Frameshift	ENSSSCT00000031570	ENSSSCG00000026053	Exon 1	ALKBH2
14	44327035	44327035	Insertion	1	○	○	○	○	○	○	○	●	○	●	Frameshift	ENSSSCT00000031570	ENSSSCG00000026053	Exon 1	ALKBH2
14	45641774	45641774	Deletion	1	○	○	○	○	●	○	○	○	●	○	Frameshift	ENSSSCT00000010903	ENSSSCG00000009951	Exon 1	SGSM1
14	46492358	46492358	Insertion	1	●	●	●	●	●	●	●	○	●	●	Frameshift	ENSSSCT00000010912	ENSSSCG00000009957	Exon 41	MYO18B
14	46492399	46492399	Insertion	1	●	●	●	●	●	●	●	○	●	●	Frameshift	ENSSSCT00000010912	ENSSSCG00000009957	Exon 41	MYO18B
14	46511605	46511605	Deletion	1	○	●	●	○	●	●	●	○	●	●	Frameshift	ENSSSCT00000010912	ENSSSCG00000009957	Exon 42	MYO18B
14	46511648	46511648	Insertion	1	○	●	●	○	●	●	●	○	●	●	Frameshift	ENSSSCT00000010912	ENSSSCG00000009957	Exon 42	MYO18B
14	46980574	46980574	Insertion	1	●	●	●	●	●	●	●	●	●	●	Frameshift	ENSSSCT00000010917	ENSSSCG00000009962	Exon 9	TFIP11
14	47987526	47987526	Insertion	1	○	●	●	●	●	●	●	●	●	●	Frameshift	ENSSSCT00000010922	ENSSSCG00000009966	Exon 4	MN1
14	47987556	47987556	Insertion	1	○	●	●	●	●	●	●	●	●	●	Frameshift	ENSSSCT00000010922	ENSSSCG00000009966	Exon 3	MN1
14	47987710	47987710	Deletion	1	○	●	●	●	●	●	●	●	●	●	Stopgain	ENSSSCT00000010922	ENSSSCG00000009966	Exon 2	MN1
14	50583015	50583015	Insertion	9	○	○	●	○	○	○	●	●	●	○	Nonframeshift	ENSSSCT00000010967	ENSSSCG00000010010	Exon 13	PES1
14	50669128	50669128	Deletion	1	○	○	○	○	○	○	○	○	●	○	Frameshift	ENSSSCT00000010972	ENSSSCG00000010015	Exon 1	OSBP2
14	52620672	52620672	Insertion	1	○	●	●	●	○	●	○	○	○	○	Frameshift	ENSSSCT00000011009	ENSSSCG00000010048	Exon 6	RAB36
14	54999909	54999909	Insertion	1	●	●	●	●	●	●	○	●	●	●	Frameshift	ENSSSCT00000011092	ENSSSCG00000010131	Exon 14	TXNRD2
14	54999944	54999944	Insertion	1	●	●	●	●	●	●	○	●	●	●	Frameshift	ENSSSCT00000011092	ENSSSCG00000010131	Exon 13	TXNRD2
14	55379669	55379669	Deletion	1	○	●	○	○	○	○	○	○	○	●	Frameshift	ENSSSCT00000031884	ENSSSCG00000021444	Exon 2
14	58590919	58590919	Deletion	1	●	●	●	●	●	●	●	●	●	●	Frameshift	ENSSSCT00000011105	ENSSSCG00000010143	Exon 13	MTR
14	58819711	58819711	Insertion	1	○	●	●	○	○	●	○	●	○	●	Frameshift	ENSSSCT00000011107	ENSSSCG00000010145	Exon 20	HEATR1
14	59117176	59117176	Deletion	1	●	●	●	●	●	○	○	○	●	○	Frameshift	ENSSSCT00000011113	ENSSSCG00000010149	Exon 2	GPR137B
14	59253730	59253730	Deletion	1	●	○	○	●	○	○	○	●	○	●	Frameshift	ENSSSCT00000011114	ENSSSCG00000010150	Exon 1
14	59571150	59571150	Insertion	1	●	●	○	○	●	●	○	●	●	●	Frameshift	ENSSSCT00000011115	ENSSSCG00000010151	Exon 14	LYST
14	59577387	59577388	Deletion	2	●	○	○	○	○	○	○	○	○	○	Frameshift	ENSSSCT00000011115	ENSSSCG00000010151	Exon 24	LYST
14	59577387	59577387	Deletion	1	○	○	○	○	○	○	○	○	●	●	Frameshift	ENSSSCT00000011115	ENSSSCG00000010151	Exon 24	LYST
14	59597173	59597173	Insertion	3	●	●	○	○	●	○	○	○	●	●	Nonframeshift	ENSSSCT00000011115	ENSSSCG00000010151	Exon 30	LYST
14	65799983	65799990	Deletion	8	○	○	○	○	●	○	○	○	○	○	Frameshift	ENSSSCT00000011162	ENSSSCG00000010196	Exon 13
14	65830858	65830858	Insertion	1	○	○	○	●	●	●	●	○	●	○	Frameshift	ENSSSCT00000027466	ENSSSCG00000023596	Exon 4
14	66181696	66181696	Insertion	1	○	●	○	●	●	●	●	●	●	●	Frameshift	ENSSSCT00000011165	ENSSSCG00000010199	Exon 14	RET
14	69256000	69256008	Deletion	9	●	●	●	●	●	○	○	○	○	○	Frameshift	ENSSSCT00000011179	ENSSSCG00000010213	Exon 4	PSMA5
14	71864929	71864929	Deletion	1	○	●	●	●	●	○	●	●	●	●	Frameshift	ENSSSCT00000023294	ENSSSCG00000024081	Exon 4	NRBF2
14	77018297	77018297	Insertion	3	○	○	●	○	○	○	○	○	○	○	Nonframeshift	ENSSSCT00000011201	ENSSSCG00000010234	Exon 1	RPSAP58
14	77503877	77503877	Deletion	1	●	○	○	○	○	●	○	○	○	○	Frameshift	ENSSSCT00000028852	ENSSSCG00000025876	Exon 9	PBLD
14	81796653	81796653	Insertion	1	○	●	●	●	●	●	●	●	●	●	Frameshift	ENSSSCT00000011266	ENSSSCG00000010293	Exon 2	OIT3
14	88700709	88700717	Deletion	9	●	○	○	●	●	○	○	○	○	○	Nonframeshift	ENSSSCT00000011314	ENSSSCG00000010336	Exon 2	SFTPA2
14	96122591	96122591	Deletion	1	●	●	○	○	●	○	○	○	○	○	Frameshift	ENSSSCT00000011356	ENSSSCG00000010374	Exon 2	RBP3
14	96497785	96497785	Insertion	1	●	●	○	○	○	●	●	●	○	○	Frameshift	ENSSSCT00000011361	ENSSSCG00000010379	Exon 26
14	96508290	96508290	Deletion	1	○	○	○	○	○	○	○	○	●	○	Frameshift	ENSSSCT00000011361	ENSSSCG00000010379	Exon 19
14	97177506	97177506	Insertion	1	●	●	●	●	●	●	●	●	●	●	Frameshift	ENSSSCT00000011366	ENSSSCG00000010383	Exon 2	WDFY4
14	97177545	97177545	Insertion	1	●	●	●	●	●	●	●	●	●	●	Frameshift	ENSSSCT00000011366	ENSSSCG00000010383	Exon 3	WDFY4
14	97851130	97851130	Insertion	1	○	●	●	●	●	●	●	○	●	●	Frameshift	ENSSSCT00000011374	ENSSSCG00000010390	Exon 6	DRGX
14	98127621	98127621	Insertion	1	○	●	●	●	●	●	●	●	●	●	Frameshift	ENSSSCT00000011378	ENSSSCG00000010394	Exon 9	OGDHL
14	98670771	98670773	Deletion	3	○	○	●	○	○	○	○	○	○	○	Nonframeshift	ENSSSCT00000011385	ENSSSCG00000010401	Exon 21	FAM21A
14	98908268	98908268	Insertion	1	○	○	●	○	●	●	●	●	○	○	Frameshift	ENSSSCT00000011388	ENSSSCG00000010404	Exon 8	ALOX5
14	109689950	109689950	Deletion	1	●	●	○	●	○	●	●	●	●	●	Frameshift	ENSSSCT00000011428	ENSSSCG00000010443	Exon 1	LIPN
14	109830093	109830093	Deletion	1	●	●	●	●	○	●	●	●	●	●	Frameshift	ENSSSCT00000011431	ENSSSCG00000010446	Exon 6	STAMBPL1
14	110459891	110459891	Insertion	1	○	●	●	●	○	●	●	●	●	●	Frameshift	ENSSSCT00000011442	ENSSSCG00000010456	Exon 1	PANK1
14	110460058	110460069	Deletion	12	○	○	○	○	○	○	○	○	○	●	Nonframeshift	ENSSSCT00000011442	ENSSSCG00000010456	Exon 1	PANK1
14	113349131	113349131	Insertion	12	○	○	○	○	○	●	○	○	○	○	Nonframeshift	ENSSSCT00000011456	ENSSSCG00000010468	Exon 1	CPEB3
14	115819928	115819928	Insertion	1	○	○	○	○	○	○	○	●	○	○	Frameshift	ENSSSCT00000023538	ENSSSCG00000023002	Exon 2
14	117670519	117670521	Deletion	3	○	●	●	○	○	○	○	○	○	○	Nonframeshift	ENSSSCT00000011498	ENSSSCG00000010508	Exon 1	TM9SF3
14	118129811	118129811	Insertion	1	○	●	●	○	●	●	○	●	●	○	Frameshift	ENSSSCT00000011502	ENSSSCG00000010512	Exon 12	SLIT1
14	120771262	120771262	Insertion	1	●	○	●	●	●	●	●	○	●	●	Frameshift	ENSSSCT00000034911	ENSSSCG00000010548	Exon 14	CHUK
14	121755803	121755803	Deletion	1	○	○	●	○	○	○	○	○	●	●	Frameshift	ENSSSCT00000027642	ENSSSCG00000030428	Exon 1	C10orf2
14	121755842	121755842	Insertion	1	○	○	○	○	○	○	○	○	●	○	Frameshift	ENSSSCT00000027642	ENSSSCG00000030428	Exon 1	C10orf2
14	121755870	121755870	Deletion	1	●	●	●	●	●	●	●	●	●	●	Frameshift	ENSSSCT00000027642	ENSSSCG00000030428	Exon 1	C10orf2
14	123361287	123361287	Deletion	1	●	●	○	●	●	●	●	●	●	●	Frameshift	ENSSSCT00000011579	ENSSSCG00000010586	Exon 2	SUFU
14	135743665	135743665	Deletion	1	○	●	●	○	●	○	●	●	●	●	Frameshift	ENSSSCT00000011648	ENSSSCG00000010649	Exon 10	VWA2
14	136580287	136580287	Insertion	3	○	○	○	○	○	○	○	○	○	●	Nonframeshift	ENSSSCT00000032203	ENSSSCG00000010654	Exon 1	ATRNL1
14	136580287	136580287	Insertion	6	○	○	○	○	○	○	○	●	○	○	Nonframeshift	ENSSSCT00000032203	ENSSSCG00000010654	Exon 1	ATRNL1
14	138132752	138132752	Deletion	1	○	●	●	●	●	●	●	●	●	●	Frameshift	ENSSSCT00000011660	ENSSSCG00000010660	Exon 11	PNLIPRP2
14	143955296	143955296	Insertion	1	○	○	●	●	●	●	●	○	○	●	Frameshift	ENSSSCT00000011727	ENSSSCG00000010718	Exon 48	SSC4D
14	143955372	143955372	Deletion	1	○	○	●	●	●	●	●	○	○	●	Frameshift	ENSSSCT00000011727	ENSSSCG00000010718	Exon 48	SSC4D
14	145295816	145295816	Insertion	3	○	○	○	●	○	○	○	○	○	○	Nonframeshift	ENSSSCT00000011745	ENSSSCG00000010733	Exon 2	NKX1-2
14	152204611	152204611	Deletion	1	○	○	○	●	○	○	○	○	○	●	Frameshift	ENSSSCT00000030128	ENSSSCG00000024388	Exon 1	BNIP3
14	152342468	152342468	Deletion	1	○	●	●	●	●	○	●	●	●	●	Frameshift	ENSSSCT00000011774	ENSSSCG00000010762	Exon 15	DPYSL4
14	152485384	152485384	Insertion	3	○	○	○	○	○	○	○	●	○	●	Nonframeshift	ENSSSCT00000011776	ENSSSCG00000010764	Exon 5	LRRC27
14	152898358	152898358	Deletion	1	○	○	○	●	○	○	○	○	○	○	Frameshift	ENSSSCT00000011779	ENSSSCG00000010767	Exon 10
14	153094854	153094854	Insertion	1	○	●	●	●	●	○	●	●	●	○	Frameshift	ENSSSCT00000011784	ENSSSCG00000010770	Exon 1	KNDC1
15	1214980	1214981	Deletion	2	○	○	●	○	○	○	○	○	○	○	Frameshift	ENSSSCT00000017080	ENSSSCG00000015680	Exon 3
15	8511253	8511254	Deletion	2	○	○	○	○	○	○	●	○	○	○	Frameshift	ENSSSCT00000017069	ENSSSCG00000015670	Exon 1	GTDC1
15	8511264	8511264	Deletion	1	○	○	○	●	○	○	○	○	○	○	Frameshift	ENSSSCT00000017069	ENSSSCG00000015670	Exon 1	GTDC1
15	17511681	17511683	Deletion	3	○	○	○	○	○	●	○	●	○	○	Nonframeshift	ENSSSCT00000017087	ENSSSCG00000015687	Exon 3	CCT6A
15	17512902	17512904	Deletion	3	○	○	○	○	○	●	○	○	○	○	Nonframeshift	ENSSSCT00000017087	ENSSSCG00000015687	Exon 7	CCT6A
15	18996995	18996995	Insertion	1	○	○	○	●	○	○	●	●	●	●	Frameshift	ENSSSCT00000017094	ENSSSCG00000015694	Exon 2	ZRANB3
15	18997132	18997132	Insertion	1	○	○	○	●	○	○	●	●	●	●	Frameshift	ENSSSCT00000017094	ENSSSCG00000015694	Exon 3	ZRANB3
15	19181175	19181175	Insertion	1	○	○	○	○	○	○	●	○	●	○	Frameshift	ENSSSCT00000017094	ENSSSCG00000015694	Exon 21	ZRANB3
15	20191236	20191243	Deletion	8	○	○	○	●	○	○	○	○	○	○	Frameshift	ENSSSCT00000017101	ENSSSCG00000015701	Exon 9	MGAT5
15	20191237	20191243	Deletion	7	○	○	○	○	●	○	○	○	○	○	Frameshift	ENSSSCT00000017101	ENSSSCG00000015701	Exon 9	MGAT5
15	22501502	22501513	Deletion	12	○	○	○	●	○	○	○	○	○	○	Nonframeshift	ENSSSCT00000017108	ENSSSCG00000015708	Exon 1	RRM2
15	24722912	24722918	Deletion	7	○	●	●	○	○	○	○	○	○	○	Frameshift	ENSSSCT00000031946	ENSSSCG00000026504	Exon 3
15	33168203	33168203	Deletion	1	○	○	○	○	○	○	●	○	○	○	Frameshift	ENSSSCT00000032002	ENSSSCG00000030079	Exon 5
15	51990871	51990871	Deletion	1	○	○	○	○	○	○	○	○	●	○	Frameshift	ENSSSCT00000017182	ENSSSCG00000015781	Exon 7	ENPP6
15	55345843	55345843	Insertion	1	●	●	●	●	●	●	●	●	●	●	Frameshift	ENSSSCT00000017228	ENSSSCG00000015820	Exon 2	WHSC1L1
15	55811948	55811950	Deletion	3	○	●	○	○	○	○	●	●	●	○	Nonframeshift	ENSSSCT00000017236	ENSSSCG00000015828	Exon 2	ZNF703
15	57404020	57404020	Insertion	1	○	●	●	●	●	●	●	●	○	●	Frameshift	ENSSSCT00000017238	ENSSSCG00000015830	Exon 11	UNC5D
15	66308739	66308739	Insertion	1	○	●	●	●	●	●	●	●	○	●	Frameshift	ENSSSCT00000026043	ENSSSCG00000015861	Exon 3	WDR33
15	73968171	73968171	Insertion	6	○	○	○	○	●	○	○	○	○	○	Nonframeshift	ENSSSCT00000035432	ENSSSCG00000015884	Exon 1	CD302
15	76760256	76760262	Deletion	7	○	○	○	●	○	○	○	○	○	○	Frameshift	ENSSSCT00000017311	ENSSSCG00000015898	Exon 23	KCNH7
15	76760256	76760263	Deletion	8	○	○	●	○	●	○	○	○	○	○	Frameshift	ENSSSCT00000017311	ENSSSCG00000015898	Exon 23	KCNH7
15	76767362	76767365	Deletion	4	●	○	○	○	○	○	○	○	○	○	Frameshift	ENSSSCT00000017311	ENSSSCG00000015898	Exon 18	KCNH7
15	80066938	80066938	Insertion	1	●	○	●	●	●	○	●	○	●	○	Frameshift	ENSSSCT00000017325	ENSSSCG00000015911	Exon 33	SCN3A
15	84440736	84440736	Insertion	1	○	○	○	○	●	○	○	○	○	○	Frameshift	ENSSSCT00000017339	ENSSSCG00000015923	Exon 13	NOSTRIN
15	84507700	84507700	Deletion	1	●	○	●	●	●	○	○	○	○	○	Frameshift	ENSSSCT00000017343	ENSSSCG00000015926	Exon 28	ABCB11
15	84633362	84633362	Deletion	1	○	○	●	○	○	○	○	●	○	○	Stoploss	ENSSSCT00000017346	ENSSSCG00000015930	Exon 3	DHRS9
15	85155830	85155830	Deletion	1	●	●	●	●	●	●	○	●	●	●	Frameshift	ENSSSCT00000017353	ENSSSCG00000015937	Exon 3	KLHL23
15	87894319	87894322	Deletion	4	○	○	○	○	○	○	●	○	●	○	Frameshift	ENSSSCT00000017372	ENSSSCG00000015955	Exon 29	ITGA6
15	92437906	92437907	Deletion	2	○	○	●	○	○	○	○	○	○	○	Frameshift	ENSSSCT00000017408	ENSSSCG00000015987	Exon 1	NFE2L2
15	92657348	92657348	Deletion	1	○	●	●	○	●	●	●	●	●	●	Frameshift	ENSSSCT00000030764	ENSSSCG00000023983	Exon 5	AGPS
15	97057134	97057134	Insertion	2	○	○	●	●	○	○	○	○	○	○	Frameshift	ENSSSCT00000024180	ENSSSCG00000023924	Exon 11	PDE1A
15	100873070	100873070	Insertion	3	●	●	○	●	●	○	○	○	●	○	Nonframeshift	ENSSSCT00000017448	ENSSSCG00000016024	Exon 7	FSIP2
15	115415598	115415598	Insertion	3	○	○	●	○	●	○	○	○	○	○	Nonframeshift	ENSSSCT00000017520	ENSSSCG00000016092	Exon 7	SGOL2
15	116251021	116251022	Deletion	2	○	○	○	○	○	○	○	●	●	●	Frameshift	ENSSSCT00000017536	ENSSSCG00000016106	Exon 6	CASP8
15	118236923	118236923	Deletion	1	○	●	○	●	●	○	●	○	●	●	Frameshift	ENSSSCT00000017550	ENSSSCG00000016119	Exon 29	RAPH1
15	118237237	118237242	Deletion	6	○	●	○	○	○	○	○	○	●	○	Nonframeshift	ENSSSCT00000017550	ENSSSCG00000016119	Exon 28	RAPH1
15	120861353	120861353	Insertion	1	●	●	●	●	●	●	○	○	●	●	Frameshift	ENSSSCT00000017556	ENSSSCG00000016125	Exon 10	INO80D
15	122703672	122703672	Insertion	3	○	○	○	●	○	○	○	○	○	○	Nonframeshift	ENSSSCT00000023180	ENSSSCG00000021552	Exon 1	PLEKHM3
15	134103753	134103753	Insertion	3	○	○	●	○	●	○	○	●	○	○	Nonframeshift	ENSSSCT00000017644	ENSSSCG00000016203	Exon 1	CCDC108
15	134436383	134436383	Insertion	1	○	○	○	○	●	○	○	○	○	○	Frameshift	ENSSSCT00000017661	ENSSSCG00000016220	Exon 5	DNPEP
15	134508002	134508002	Insertion	1	○	○	○	○	●	○	○	●	○	○	Frameshift	ENSSSCT00000031176	ENSSSCG00000020771	Exon 3	INHA
15	134512278	134512278	Insertion	1	○	○	○	○	●	○	○	○	○	○	Frameshift	ENSSSCT00000023627	ENSSSCG00000028052	Exon 1	OBSL1
15	134588572	134588572	Insertion	1	○	●	○	○	●	○	○	●	○	○	Frameshift	ENSSSCT00000023494	ENSSSCG00000021610	Exon 1	CHPF
15	138094171	138094171	Deletion	1	○	●	○	●	●	●	●	●	●	●	Frameshift	ENSSSCT00000017667	ENSSSCG00000016225	Exon 4	MOGAT1
15	139249477	139249477	Insertion	3	○	○	●	●	●	○	○	○	○	○	Nonframeshift	ENSSSCT00000036636	ENSSSCG00000016233	Exon 1	SERPINE2
15	140985127	140985127	Insertion	7	○	○	○	○	○	○	○	○	●	○	Frameshift	ENSSSCT00000017684	ENSSSCG00000016240	Exon 6
15	140985156	140985156	Insertion	13	○	○	○	○	○	○	○	○	●	○	Frameshift	ENSSSCT00000017684	ENSSSCG00000016240	Exon 6
15	142285416	142285416	Insertion	1	○	○	○	○	●	○	○	○	○	○	Frameshift	ENSSSCT00000017688	ENSSSCG00000016244	Exon 49	COL4A4
15	143220703	143220703	Insertion	1	●	○	●	●	○	○	○	○	●	○	Frameshift	ENSSSCT00000017701	ENSSSCG00000016256	Exon 7	SPHKAP
15	144875762	144875762	Deletion	1	○	○	○	○	○	○	○	●	●	●	Frameshift	ENSSSCT00000017706	ENSSSCG00000016261	Exon 12	SP110
15	147638708	147638708	Insertion	2	○	○	●	○	○	○	○	○	○	○	Frameshift	ENSSSCT00000017748	ENSSSCG00000016298	Exon 10	INPP5D
15	148210202	148210202	Insertion	8	○	○	○	○	○	○	●	○	○	○	Frameshift	ENSSSCT00000017756	ENSSSCG00000016305	Exon 34	MROH2A
15	148543238	148543238	Insertion	3	○	○	●	●	○	○	○	○	○	○	Nonframeshift	ENSSSCT00000017766	ENSSSCG00000016313	Exon 8	HJURP
15	150711630	150711630	Insertion	1	●	●	●	●	●	●	●	●	●	●	Frameshift	ENSSSCT00000017774	ENSSSCG00000016321	Exon 5	IQCA1
15	152077364	152077364	Insertion	1	○	●	●	○	●	●	●	●	●	○	Frameshift	ENSSSCT00000017787	ENSSSCG00000016334	Exon 8	SCLY
15	152988606	152988606	Insertion	1	○	●	○	○	●	●	●	●	○	●	Frameshift	ENSSSCT00000027033	ENSSSCG00000024777	Exon 11	HDAC4
15	154448890	154448890	Insertion	1	○	●	○	○	●	○	○	○	○	○	Frameshift	ENSSSCT00000017819	ENSSSCG00000016364	Exon 1	GPC1
15	155088567	155088567	Insertion	1	○	●	●	●	●	●	○	●	●	●	Frameshift	ENSSSCT00000017834	ENSSSCG00000016379	Exon 6	HDLBP
15	155088586	155088586	Insertion	1	○	●	●	●	●	●	○	●	●	●	Frameshift	ENSSSCT00000017834	ENSSSCG00000016379	Exon 5	HDLBP
15	156960095	156960095	Insertion	1	○	○	●	●	●	○	●	○	●	●	Frameshift	ENSSSCT00000017854	ENSSSCG00000016397	Exon 29
15	156960136	156960136	Insertion	1	○	○	●	●	●	○	●	○	●	●	Frameshift	ENSSSCT00000017854	ENSSSCG00000016397	Exon 29
15	157558404	157558404	Insertion	1	○	○	●	○	○	○	○	○	○	○	Frameshift	ENSSSCT00000017858	ENSSSCG00000016401	Exon 8	KIF1A
16	4330679	4330679	Deletion	1	○	●	○	○	○	○	○	○	○	○	Frameshift	ENSSSCT00000018269	ENSSSCG00000016782	Exon 2	FAM105A
16	5744456	5744456	Insertion	1	○	●	○	●	○	○	○	○	●	●	Frameshift	ENSSSCT00000018276	ENSSSCG00000016789	Exon 4	POM121C
16	6058742	6058755	Deletion	14	○	○	○	●	○	○	○	○	○	○	Frameshift	ENSSSCT00000024926	ENSSSCG00000022531	Exon 2
16	6158503	6158503	Insertion	1	○	●	○	○	○	○	○	○	○	○	Frameshift	ENSSSCT00000018281	ENSSSCG00000016793	Exon 1	ZNF622
16	6383820	6383820	Deletion	1	○	○	○	○	●	●	●	●	○	●	Frameshift	ENSSSCT00000018282	ENSSSCG00000016794	Exon 24
16	19146986	19146986	Insertion	1	○	○	○	○	○	○	○	●	●	●	Frameshift	ENSSSCT00000023589	ENSSSCG00000016810	Exon 1	PDZD2
16	22411124	22411124	Deletion	1	○	○	○	●	○	○	○	●	●	○	Frameshift	ENSSSCT00000029726	ENSSSCG00000020824	Exon 3	UGT3A1
16	22411321	22411321	Insertion	1	○	○	○	●	○	○	○	○	○	●	Frameshift	ENSSSCT00000029726	ENSSSCG00000020824	Exon 3	UGT3A1
16	22992336	22992336	Insertion	3	○	○	○	○	●	○	○	○	○	○	Nonframeshift	ENSSSCT00000018338	ENSSSCG00000016841	Exon 6	SLC1A3
16	22992343	22992343	Insertion	7	○	○	○	○	○	●	○	○	○	○	Frameshift	ENSSSCT00000018338	ENSSSCG00000016841	Exon 6	SLC1A3
16	22992343	22992343	Insertion	9	○	○	○	○	○	○	○	○	●	○	Nonframeshift	ENSSSCT00000018338	ENSSSCG00000016841	Exon 6	SLC1A3
16	23454034	23454034	Insertion	1	●	●	●	●	●	●	○	●	●	●	Frameshift	ENSSSCT00000018339	ENSSSCG00000016842	Exon 21	NIPBL
16	29023305	29023305	Insertion	6	○	○	○	○	○	●	○	○	○	○	Nonframeshift	ENSSSCT00000031007	ENSSSCG00000021208	Exon 2	SEPP1
16	31323510	31323510	Insertion	1	○	●	●	●	●	○	●	●	○	●	Frameshift	ENSSSCT00000028722	ENSSSCG00000026527	Exon 1	HCN1
16	31323577	31323577	Insertion	1	○	●	●	●	●	○	●	●	○	●	Frameshift	ENSSSCT00000028722	ENSSSCG00000026527	Exon 1	HCN1
16	31755447	31755447	Deletion	1	○	○	○	○	○	●	○	○	○	○	Frameshift	ENSSSCT00000030477	ENSSSCG00000029484	Exon 7	EMB
16	36388746	36388746	Insertion	3	●	○	○	○	○	○	○	○	○	○	Nonframeshift	ENSSSCT00000018409	ENSSSCG00000016903	Exon 2	GZMA
16	37522454	37522454	Insertion	1	○	○	○	○	○	○	○	○	●	○	Frameshift	ENSSSCT00000018422	ENSSSCG00000016916	Exon 18	IL6ST
16	37522521	37522521	Insertion	1	●	○	●	○	●	●	●	●	○	●	Frameshift	ENSSSCT00000018422	ENSSSCG00000016916	Exon 19	IL6ST
16	42389458	42389458	Deletion	1	●	○	●	●	○	○	○	○	○	○	Frameshift	ENSSSCT00000018439	ENSSSCG00000016932	Exon 34	DEPDC1B
16	42392044	42392046	Deletion	3	●	●	●	●	○	○	○	●	○	○	Nonframeshift	ENSSSCT00000018439	ENSSSCG00000016932	Exon 28	DEPDC1B
16	52620286	52620286	Insertion	1	●	●	○	○	○	○	○	○	○	○	Frameshift	ENSSSCT00000018485	ENSSSCG00000016975	Exon 9	PTCD2
16	56206342	56206342	Insertion	1	●	●	●	●	●	●	●	○	●	○	Frameshift	ENSSSCT00000024674	ENSSSCG00000027378	Exon 8	SH3PXD2B
16	68129327	68129328	Deletion	2	○	○	○	●	○	○	○	○	○	○	Frameshift	ENSSSCT00000030114	ENSSSCG00000021527	Exon 28	ATP10B
16	68160603	68160608	Deletion	6	○	○	○	○	●	○	○	○	○	○	Nonframeshift	ENSSSCT00000030114	ENSSSCG00000021527	Exon 9	ATP10B
16	68160603	68160605	Deletion	3	●	○	○	●	○	○	○	○	○	○	Nonframeshift	ENSSSCT00000030114	ENSSSCG00000021527	Exon 9	ATP10B
16	71403305	71403305	Insertion	1	●	●	●	●	●	●	●	●	○	●	Frameshift	ENSSSCT00000018560	ENSSSCG00000017047	Exon 13	CLINT1
16	71403368	71403368	Insertion	1	●	●	●	●	●	●	●	●	○	●	Frameshift	ENSSSCT00000018560	ENSSSCG00000017047	Exon 14	CLINT1
16	71452224	71452224	Insertion	1	○	○	○	●	○	○	○	○	○	●	Frameshift	ENSSSCT00000029282	ENSSSCG00000024721	Exon 2	LSM11
16	71457609	71457609	Insertion	1	○	○	●	○	○	○	●	●	○	●	Frameshift	ENSSSCT00000018562	ENSSSCG00000017049	Exon 6	THG1L
16	71683667	71683674	Deletion	8	○	○	○	●	○	○	○	○	○	○	Frameshift	ENSSSCT00000025764	ENSSSCG00000017053	Exon 2	NIPAL4
16	77723249	77723249	Insertion	1	○	○	●	●	○	○	○	○	○	○	Frameshift	ENSSSCT00000018600	ENSSSCG00000017084	Exon 10	FAT2
16	77727278	77727278	Insertion	1	○	○	●	●	●	○	●	●	○	○	Frameshift	ENSSSCT00000018600	ENSSSCG00000017084	Exon 13	FAT2
16	78027657	78027658	Deletion	2	●	○	○	○	○	○	○	○	○	○	Frameshift	ENSSSCT00000026502	ENSSSCG00000028058	Exon 1	CCDC69
16	80304575	80304577	Deletion	3	●	○	○	●	○	○	●	○	○	●	Nonframeshift	ENSSSCT00000018618	ENSSSCG00000017100	Exon 10	MTRR
16	80325524	80325524	Insertion	1	●	○	○	●	●	●	●	○	○	●	Frameshift	ENSSSCT00000018617	ENSSSCG00000017099	Exon 1	FASTKD3
16	85868425	85868425	Insertion	1	○	●	●	○	●	●	●	●	●	●	Frameshift	ENSSSCT00000018639	ENSSSCG00000017121	Exon 5	SLC6A3
16	85870356	85870365	Deletion	10	○	○	●	○	○	○	○	○	○	○	Frameshift	ENSSSCT00000018639	ENSSSCG00000017121	Exon 6	SLC6A3
16	86164838	86164838	Insertion	6	○	○	○	○	○	●	○	○	○	○	Nonframeshift	ENSSSCT00000018640	ENSSSCG00000017122	Exon 13	LILRA4
16	86738847	86738847	Deletion	1	○	○	○	●	○	○	○	○	○	○	Frameshift	ENSSSCT00000018641	ENSSSCG00000017123	Exon 1
17	1060878	1060878	Insertion	1	●	○	○	○	○	●	●	●	○	●	Frameshift	ENSSSCT00000007635	ENSSSCG00000006970	Exon 10	DLC1
17	9342392	9342392	Deletion	1	○	●	○	○	●	○	●	●	●	○	Frameshift	ENSSSCT00000007666	ENSSSCG00000007000	Exon 2	FAT1
17	9342610	9342610	Deletion	1	○	○	○	○	●	○	●	●	●	○	Frameshift	ENSSSCT00000007666	ENSSSCG00000007000	Exon 2	FAT1
17	9342634	9342634	Insertion	1	○	●	○	○	●	○	●	●	●	○	Frameshift	ENSSSCT00000007666	ENSSSCG00000007000	Exon 2	FAT1
17	14460917	14460917	Deletion	1	○	○	○	○	○	●	○	○	●	●	Frameshift	ENSSSCT00000007707	ENSSSCG00000007038	Exon 24	ANKRD26
17	15472312	15472312	Insertion	1	●	●	●	○	○	●	●	●	●	○	Frameshift	ENSSSCT00000026307	ENSSSCG00000007043	Exon 15	GPCPD1
17	16113143	16113147	Deletion	5	○	○	○	●	○	○	○	○	○	○	Frameshift	ENSSSCT00000023191	ENSSSCG00000024507	Exon 32	ANKRD26
17	16529707	16529707	Insertion	4	○	●	●	●	●	●	●	●	○	●	Frameshift	ENSSSCT00000007724	ENSSSCG00000007053	Exon 3	TPT1
17	16529728	16529728	Insertion	1	●	●	●	●	●	●	●	●	●	●	Frameshift	ENSSSCT00000007724	ENSSSCG00000007053	Exon 2	TPT1
17	19831723	19831723	Insertion	1	●	●	○	●	●	●	●	●	○	●	Frameshift	ENSSSCT00000007727	ENSSSCG00000007056	Exon 22	PLCB1
17	19834698	19834698	Deletion	1	○	○	○	○	●	○	○	○	○	○	Frameshift	ENSSSCT00000007727	ENSSSCG00000007056	Exon 23	PLCB1
17	21871630	21871630	Insertion	1	○	●	○	○	○	○	○	○	○	○	Frameshift	ENSSSCT00000007736	ENSSSCG00000007065	Exon 1	RPLP1
17	21871837	21871837	Deletion	1	○	●	●	○	○	○	○	○	○	○	Frameshift	ENSSSCT00000007736	ENSSSCG00000007065	Exon 1	RPLP1
17	25158533	25158535	Deletion	3	○	○	○	○	○	○	●	○	○	○	Nonframeshift	ENSSSCT00000007748	ENSSSCG00000007077	Exon 1	ESF1
17	31927158	31927158	Insertion	1	○	●	○	●	○	○	●	○	○	○	Frameshift	ENSSSCT00000031545	ENSSSCG00000026506	Exon 6
17	33152537	33152537	Insertion	1	○	●	●	●	●	●	●	○	●	●	Frameshift	ENSSSCT00000007782	ENSSSCG00000007110	Exon 4	NKX2-4
17	33372535	33372540	Deletion	6	○	○	○	○	○	○	●	●	●	○	Nonframeshift	ENSSSCT00000007784	ENSSSCG00000007112	Exon 1	PAX1
17	35254543	35254543	Insertion	11	○	○	●	○	○	○	○	○	○	○	Stopgain	ENSSSCT00000026945	ENSSSCG00000007135	Exon 16	NINL
17	35256026	35256026	Insertion	2	○	○	●	○	○	○	○	○	○	○	Frameshift	ENSSSCT00000026945	ENSSSCG00000007135	Exon 18	NINL
17	36360670	36360670	Insertion	1	○	●	●	●	○	●	●	●	●	●	Frameshift	ENSSSCT00000007817	ENSSSCG00000007145	Exon 13	ADAM33
17	36924739	36924739	Insertion	1	●	●	●	●	○	●	●	●	●	●	Frameshift	ENSSSCT00000007835	ENSSSCG00000007162	Exon 4	UBOX5
17	39155446	39155446	Insertion	1	○	●	●	○	●	●	○	○	●	●	Frameshift	ENSSSCT00000007878	ENSSSCG00000007199	Exon 3	SLC52A3
17	41706954	41706965	Deletion	12	○	○	○	●	○	●	○	○	●	○	Nonframeshift	ENSSSCT00000007944	ENSSSCG00000007260	Exon 2	BPIFA1
17	45223993	45223994	Deletion	2	○	○	○	○	●	○	○	○	○	○	Frameshift	ENSSSCT00000008007	ENSSSCG00000007317	Exon 9	DLGAP4
17	45223993	45223995	Deletion	3	○	○	○	●	○	●	○	○	●	●	Nonframeshift	ENSSSCT00000008007	ENSSSCG00000007317	Exon 9	DLGAP4
17	47363980	47363980	Deletion	1	●	○	●	●	●	○	●	●	○	●	Frameshift	ENSSSCT00000008043	ENSSSCG00000007351	Exon 3	FAM83D
17	49203298	49203306	Deletion	9	○	○	○	○	●	○	○	○	○	○	Nonframeshift	ENSSSCT00000008048	ENSSSCG00000007356	Exon 1	PLCG1
17	49453890	49453890	Insertion	1	○	●	●	●	●	○	●	○	●	●	Frameshift	ENSSSCT00000008050	ENSSSCG00000007358	Exon 4	EMILIN3
17	49453910	49453910	Insertion	1	○	●	●	●	●	○	●	○	●	●	Frameshift	ENSSSCT00000008050	ENSSSCG00000007358	Exon 4	EMILIN3
17	51643070	51643070	Deletion	1	●	●	○	○	○	●	○	●	●	○	Frameshift	ENSSSCT00000023818	ENSSSCG00000024325	Exon 10	SGK2
17	52383646	52383646	Insertion	6	○	○	○	○	●	○	○	●	○	○	Nonframeshift	ENSSSCT00000024080	ENSSSCG00000028245	Exon 4	TTPAL
17	53231377	53231377	Insertion	1	○	●	●	○	○	●	●	●	●	●	Frameshift	ENSSSCT00000008090	ENSSSCG00000007391	Exon 3	MATN4
17	53863008	53863008	Deletion	1	○	●	●	○	○	●	●	●	●	●	Frameshift	ENSSSCT00000008141	ENSSSCG00000007437	Exon 15	SLC12A5
17	54058717	54058717	Insertion	9	○	●	○	○	○	○	○	○	○	○	Nonframeshift	ENSSSCT00000008143	ENSSSCG00000007439	Exon 1	CDH22
17	54527056	54527056	Insertion	1	○	●	●	●	○	●	●	●	○	●	Frameshift	ENSSSCT00000008155	ENSSSCG00000007451	Exon 2	SLC2A10
17	54527119	54527119	Insertion	1	○	●	●	●	○	●	●	●	○	●	Frameshift	ENSSSCT00000008155	ENSSSCG00000007451	Exon 3	SLC2A10
17	55282146	55282146	Insertion	1	○	○	○	○	○	○	●	○	●	●	Frameshift	ENSSSCT00000008158	ENSSSCG00000007454	Exon 15	ZMYND8
17	65664819	65664819	Insertion	1	○	○	●	●	●	○	●	○	○	○	Frameshift	ENSSSCT00000008228	ENSSSCG00000007512	Exon 16
17	65666172	65666172	Insertion	1	○	○	○	○	○	○	●	○	●	○	Frameshift	ENSSSCT00000008228	ENSSSCG00000007512	Exon 13
17	66733274	66733274	Insertion	3	○	○	●	○	○	○	○	○	○	○	Nonframeshift	ENSSSCT00000008253	ENSSSCG00000007526	Exon 1	ZNF831
17	66733283	66733283	Insertion	3	○	○	○	○	○	○	○	○	○	●	Nonframeshift	ENSSSCT00000008253	ENSSSCG00000007526	Exon 1	ZNF831
17	67046814	67046816	Deletion	3	○	●	○	○	○	○	○	○	○	○	Nonframeshift	ENSSSCT00000036671	ENSSSCG00000007528	Exon 1	PHACTR3
17	68378040	68378040	Insertion	2	○	○	○	○	○	●	●	○	○	○	Frameshift	ENSSSCT00000008269	ENSSSCG00000007537	Exon 5
17	68937974	68937974	Insertion	1	○	○	○	○	○	○	○	○	●	●	Frameshift	ENSSSCT00000022675	ENSSSCG00000025784	Exon 4	CDH4
17	68941613	68941613	Insertion	1	○	●	●	●	●	●	●	○	●	●	Frameshift	ENSSSCT00000022675	ENSSSCG00000025784	Exon 7	CDH4
17	68973481	68973481	Deletion	1	○	●	●	●	●	●	●	●	●	●	Frameshift	ENSSSCT00000022675	ENSSSCG00000025784	Exon 13	CDH4
18	1996992	1996992	Deletion	1	○	○	○	○	○	○	●	○	○	○	Frameshift	ENSSSCT00000017870	ENSSSCG00000016412	Exon 11	LMBR1
18	2713937	2713937	Insertion	6	○	○	○	●	○	○	○	○	○	○	Nonframeshift	ENSSSCT00000017876	ENSSSCG00000016417	Exon 15	RBM33
18	3151611	3151611	Deletion	1	○	○	○	○	○	○	○	○	○	●	Frameshift	ENSSSCT00000028589	ENSSSCG00000023549	Exon 10	HTR5A
18	3214789	3214789	Insertion	9	○	○	●	○	○	○	○	○	○	○	Nonframeshift	ENSSSCT00000030430	ENSSSCG00000030573	Exon 9	HTR5A
18	6550535	6550535	Insertion	1	○	●	●	●	●	○	○	○	●	○	Frameshift	ENSSSCT00000024743	ENSSSCG00000027986	Exon 16	ABCB8
18	7155894	7155894	Insertion	1	●	●	●	●	●	○	○	●	○	●	Frameshift	ENSSSCT00000017925	ENSSSCG00000016462	Exon 16	CLCN1
18	7266605	7266605	Insertion	1	○	○	●	○	○	○	○	○	○	○	Frameshift	ENSSSCT00000017930	ENSSSCG00000016467	Exon 3	TAS2R40
18	8498359	8498359	Insertion	1	○	○	●	●	●	●	○	●	●	●	Frameshift	ENSSSCT00000017955	ENSSSCG00000016491	Exon 2	KIAA1147
18	8647370	8647370	Insertion	2	○	○	○	○	○	○	○	●	○	○	Frameshift	ENSSSCT00000017956	ENSSSCG00000016492	Exon 8	AGK
18	8647809	8647809	Deletion	1	○	○	○	○	○	●	○	○	●	○	Frameshift	ENSSSCT00000017956	ENSSSCG00000016492	Exon 6	AGK
18	9675929	9675931	Deletion	3	○	●	○	○	○	○	○	○	●	○	Nonframeshift	ENSSSCT00000028640	ENSSSCG00000016496	Exon 1	ADCK2
18	14411392	14411392	Insertion	1	○	●	●	●	○	●	●	○	●	●	Frameshift	ENSSSCT00000030571	ENSSSCG00000026054	Exon 1	NUP205
18	18572333	18572333	Deletion	1	○	○	●	○	●	○	○	○	○	○	Frameshift	ENSSSCT00000023302	ENSSSCG00000016548	Exon 5	PODXL
18	20839878	20839889	Deletion	12	●	○	○	○	○	○	○	○	○	○	Nonframeshift	ENSSSCT00000018050	ENSSSCG00000016579	Exon 14	CCDC136
18	21324816	21324824	Deletion	9	○	●	○	○	○	○	○	○	○	○	Nonframeshift	ENSSSCT00000018061	ENSSSCG00000016589	Exon 2	LRRC4
18	35651086	35651086	Deletion	1	○	○	●	○	○	○	○	○	○	○	Frameshift	ENSSSCT00000018122	ENSSSCG00000016644	Exon 3	STIP1
18	35651697	35651697	Deletion	1	●	○	○	○	○	○	○	○	○	○	Frameshift	ENSSSCT00000018122	ENSSSCG00000016644	Exon 7	STIP1
18	36943905	36943905	Insertion	3	○	○	●	●	●	○	○	○	○	○	Nonframeshift	ENSSSCT00000018127	ENSSSCG00000016649	Exon 1
18	41337788	41337788	Deletion	1	○	●	○	●	●	○	○	○	○	○	Frameshift	ENSSSCT00000018136	ENSSSCG00000016658	Exon 6	ANLN
18	41337865	41337865	Deletion	1	○	●	○	●	●	○	○	○	○	○	Frameshift	ENSSSCT00000018136	ENSSSCG00000016658	Exon 6	ANLN
18	41338000	41338000	Deletion	1	○	●	○	●	●	○	○	○	○	○	Frameshift	ENSSSCT00000018136	ENSSSCG00000016658	Exon 5	ANLN
18	42882874	42882874	Insertion	1	●	○	○	○	○	○	○	○	○	○	Frameshift	ENSSSCT00000018143	ENSSSCG00000016664	Exon 1	NPSR1
18	42882874	42882874	Insertion	1	○	●	○	●	○	○	●	○	●	●	Frameshift	ENSSSCT00000018143	ENSSSCG00000016664	Exon 1	NPSR1
18	50077022	50077022	Insertion	3	○	○	○	●	○	○	○	○	○	○	Nonframeshift	ENSSSCT00000018185	ENSSSCG00000016704	Exon 1	HOXA4
18	50995159	50995161	Deletion	3	●	○	○	○	○	●	○	●	●	○	Nonframeshift	ENSSSCT00000027225	ENSSSCG00000026894	Exon 5	NFE2L3
18	51025027	51025027	Deletion	1	○	●	○	●	●	●	●	●	●	●	Frameshift	ENSSSCT00000027225	ENSSSCG00000026894	Exon 1	NFE2L3
18	51025122	51025122	Insertion	1	○	○	○	○	●	○	○	○	○	○	Frameshift	ENSSSCT00000027225	ENSSSCG00000026894	Exon 1	NFE2L3
18	53278194	53278199	Deletion	6	○	○	●	○	○	○	○	○	○	○	Frameshift	ENSSSCT00000018200	ENSSSCG00000016719	Exon 21	STK31
18	53863297	53863297	Insertion	1	○	●	○	●	○	●	●	●	●	●	Frameshift	ENSSSCT00000018206	ENSSSCG00000016725	Exon 17	TNS3
18	55609181	55609181	Insertion	1	○	○	●	○	○	○	○	○	○	○	Frameshift	ENSSSCT00000018227	ENSSSCG00000016745	Exon 3	DDX56
18	55609209	55609209	Deletion	1	○	○	●	○	○	●	○	●	●	●	Frameshift	ENSSSCT00000018227	ENSSSCG00000016745	Exon 3	DDX56
18	57800074	57800074	Insertion	3	○	●	○	●	●	○	○	○	○	○	Nonframeshift	ENSSSCT00000018248	ENSSSCG00000016763	Exon 3	GLI3
18	61102751	61102751	Insertion	1	○	●	○	○	○	○	○	○	●	○	Frameshift	ENSSSCT00000026620	ENSSSCG00000027766	Exon 5	ZNF467
GL892265.1	28593	28593	Insertion	2	○	○	●	○	○	○	○	○	○	●	Frameshift	ENSSSCT00000026546	ENSSSCG00000028523	Exon 6	HUS1
GL892447.1	44165	44167	Deletion	3	○	○	○	○	○	○	●	○	○	○	Frameshift	ENSSSCT00000030370	ENSSSCG00000021371	Exon 9	ZNF300
GL892520.2	81499	81499	Insertion	1	○	○	●	○	●	○	○	○	○	○	Frameshift	ENSSSCT00000024022	ENSSSCG00000020851	Exon 8	MARVELD2
GL892766.1	1863	1863	Insertion	6	○	○	●	○	○	○	○	○	●	○	Nonframeshift	ENSSSCT00000031115	ENSSSCG00000028095	Exon 11	CYP2J2
GL892783.2	62626	62626	Deletion	1	●	○	○	○	○	○	○	○	○	○	Frameshift	ENSSSCT00000031975	ENSSSCG00000025471	Exon 4	SMOC1
GL892813.1	36717	36724	Deletion	8	●	○	○	○	○	○	●	○	○	○	Frameshift	ENSSSCT00000028747	ENSSSCG00000027015	Exon 1	FAM57B
GL892843.1	47602	47602	Insertion	10	○	○	○	○	○	○	●	○	○	○	Frameshift	ENSSSCT00000031936	ENSSSCG00000029109	Exon 1	MTMR9
GL892871.2	18674	18674	Insertion	2	●	○	●	○	○	○	●	●	●	○	Frameshift	ENSSSCT00000032339	ENSSSCG00000029329	Exon 5	PNKD
GL892871.2	43343	43343	Insertion	1	●	○	●	○	○	○	○	●	○	○	Frameshift	ENSSSCT00000022794	ENSSSCG00000021949	Exon 9	SLC11A1
GL892962.1	16439	16439	Insertion	1	○	○	○	●	○	○	○	○	○	○	Frameshift	ENSSSCT00000026919	ENSSSCG00000021557	Exon 5	SULT1A2
GL893074.1	33754	33754	Insertion	3	○	○	○	○	○	○	●	○	○	○	Nonframeshift	ENSSSCT00000017855	ENSSSCG00000016398	Exon 19	NEB
GL893076.2	122094	122096	Deletion	3	○	○	○	●	○	○	○	○	○	○	Nonframeshift	ENSSSCT00000031095	ENSSSCG00000027346	Exon 17	HHLA1
GL893208.1	405	405	Insertion	8	○	○	○	○	○	●	○	○	○	○	Frameshift	ENSSSCT00000023047	ENSSSCG00000030264	Exon 1	SH3RF2
GL893264.1	57181	57181	Insertion	3	○	●	●	○	○	○	○	○	○	○	Nonframeshift	ENSSSCT00000024895	ENSSSCG00000022846	Exon 21	SLC4A3
GL893304.1	39829	39829	Deletion	1	●	○	○	○	○	○	○	○	○	○	Frameshift	ENSSSCT00000030544	ENSSSCG00000021378	Exon 5
GL893343.2	20223	20223	Insertion	1	○	○	●	○	○	○	○	○	○	○	Frameshift	ENSSSCT00000026830	ENSSSCG00000021905	Exon 10
GL893344.2	20541	20542	Deletion	2	○	○	●	●	○	○	●	○	●	○	Frameshift	ENSSSCT00000027320	ENSSSCG00000029245	Exon 15
GL893348.1	45410	45410	Insertion	2	○	●	●	●	○	●	○	●	●	●	Frameshift	ENSSSCT00000030747	ENSSSCG00000021529	Exon 4	KLF11
GL893363.2	146974	146976	Deletion	3	○	○	○	●	○	○	○	○	○	○	Nonframeshift	ENSSSCT00000002137	ENSSSCG00000001908	Exon 15	CCDC33
GL893503.1	39180	39180	Deletion	1	●	●	○	○	○	○	○	○	○	○	Frameshift	ENSSSCT00000026376	ENSSSCG00000027664	Exon 12	REPIN1
GL893533.2	37096	37096	Insertion	1	○	○	●	○	○	○	○	○	○	○	Frameshift	ENSSSCT00000023342	ENSSSCG00000028700	Exon 9
GL893533.2	37541	37545	Deletion	5	○	○	○	●	○	○	○	○	○	○	Frameshift	ENSSSCT00000023342	ENSSSCG00000028700	Exon 8
GL893597.1	11965	11965	Insertion	4	○	○	○	●	○	○	○	○	○	○	Frameshift	ENSSSCT00000023812	ENSSSCG00000024050	Exon 7	CNTNAP3B
GL893653.2	80824	80824	Insertion	2	○	●	●	○	○	○	○	○	○	○	Frameshift	ENSSSCT00000029833	ENSSSCG00000020843	Exon 14	MARK1
GL893726.1	47250	47250	Insertion	1	○	●	○	○	○	○	○	○	○	○	Frameshift	ENSSSCT00000005729	ENSSSCG00000005197	Exon 5	KDM4C
GL893744.2	85685	85685	Insertion	1	○	○	●	○	○	○	●	○	○	○	Frameshift	ENSSSCT00000029860	ENSSSCG00000023453	Exon 9	MLIP
GL893818.1	86089	86089	Insertion	9	○	●	○	○	●	○	○	○	○	○	Nonframeshift	ENSSSCT00000024212	ENSSSCG00000024053	Exon 29
GL893852.2	29278	29278	Insertion	4	○	○	●	○	○	○	○	○	○	○	Stopgain	ENSSSCT00000025805	ENSSSCG00000025733	Exon 9	IMPA1
GL893852.2	49007	49009	Deletion	3	●	○	○	○	○	○	○	○	○	○	Nonframeshift	ENSSSCT00000031288	ENSSSCG00000029434	Exon 1	SLC10A5
GL893900.2	75505	75505	Insertion	4	○	○	○	●	○	○	○	○	○	○	Frameshift	ENSSSCT00000024865	ENSSSCG00000021332	Exon 8	PAX8
GL893988.2	71232	71232	Insertion	12	○	○	●	○	○	○	○	○	○	○	Nonframeshift	ENSSSCT00000023295	ENSSSCG00000022029	Exon 4	RAP1GAP
GL894007.1	66540	66540	Deletion	1	○	○	○	○	○	●	○	○	○	○	Frameshift	ENSSSCT00000031462	ENSSSCG00000027061	Exon 16	ENGASE
GL894055.2	28403	28403	Insertion	1	●	○	○	○	○	○	○	○	○	○	Frameshift	ENSSSCT00000031596	ENSSSCG00000029306	Exon 20	FIG4
GL894085.2	39775	39775	Insertion	1	●	○	○	○	○	○	○	○	○	○	Frameshift	ENSSSCT00000025286	ENSSSCG00000030572	Exon 5	IL2RB
GL894091.2	35611	35617	Deletion	7	○	○	●	○	○	○	○	○	○	○	Frameshift	ENSSSCT00000024626	ENSSSCG00000022763	Exon 7	LPIN1
GL894184.2	30640	30642	Deletion	3	○	○	○	○	○	○	●	○	○	○	Nonframeshift	ENSSSCT00000029757	ENSSSCG00000027421	Exon 6	EIF5
GL894184.2	31180	31180	Insertion	1	●	●	●	●	○	●	●	●	●	○	Frameshift	ENSSSCT00000029757	ENSSSCG00000027421	Exon 4	EIF5
GL894233.1	18649	18650	Deletion	2	○	●	○	○	○	○	○	○	○	○	Frameshift	ENSSSCT00000029125	ENSSSCG00000027149	Exon 12	PRRT4
GL894408.2	9456	9456	Insertion	8	○	○	●	○	○	○	○	○	○	○	Frameshift	ENSSSCT00000024068	ENSSSCG00000023184	Exon 2	IRF8
GL894765.1	35088	35094	Deletion	7	○	○	○	○	●	○	○	○	○	○	Frameshift	ENSSSCT00000017299	ENSSSCG00000015887	Exon 1	ITGB6
GL894935.1	14209	14209	Insertion	7	○	○	○	○	●	○	○	○	●	○	Frameshift	ENSSSCT00000003204	ENSSSCG00000002900	Exon 8	PROSER3
GL894935.1	18954	18954	Insertion	3	○	○	○	○	○	○	○	○	●	○	Nonframeshift	ENSSSCT00000003204	ENSSSCG00000002900	Exon 13	PROSER3
GL894976.1	31441	31441	Insertion	14	○	○	●	○	○	○	○	○	○	○	Frameshift	ENSSSCT00000028582	ENSSSCG00000022012	Exon 25	GARNL3
GL894987.2	31636	31636	Insertion	1	○	○	○	○	○	○	○	○	●	○	Frameshift	ENSSSCT00000028680	ENSSSCG00000023258	Exon 5	CLEC4F
GL895152.1	61009	61009	Deletion	1	○	○	●	○	○	○	○	○	○	○	Frameshift	ENSSSCT00000028421	ENSSSCG00000021644	Exon 2	BRD7
GL895172.1	25130	25130	Deletion	1	○	○	●	○	○	○	●	○	○	○	Frameshift	ENSSSCT00000031638	ENSSSCG00000026449	Exon 13	KDM4A
GL895352.1	17134	17134	Insertion	2	○	○	○	○	○	●	●	○	●	○	Frameshift	ENSSSCT00000022777	ENSSSCG00000029573	Exon 13	NASP
GL895502.2	24291	24291	Insertion	6	○	○	○	○	○	○	○	○	●	○	Nonframeshift	ENSSSCT00000032422	ENSSSCG00000029732	Exon 4	NCL
GL895559.1	37752	37752	Insertion	1	○	○	●	○	○	○	○	○	○	○	Frameshift	ENSSSCT00000028353	ENSSSCG00000026591	Exon 1	CCR4
GL895728.2	5041	5052	Deletion	12	●	○	○	○	○	○	○	○	○	○	Frameshift	ENSSSCT00000023170	ENSSSCG00000029574	Exon 9	SLC3A2
GL895967.2	36168	36170	Deletion	3	○	○	●	○	○	○	○	○	○	●	Nonframeshift	ENSSSCT00000025165	ENSSSCG00000025596	Exon 4	PERM1
GL895974.1	14965	14965	Insertion	1	○	○	○	○	○	○	○	○	●	○	Frameshift	ENSSSCT00000030275	ENSSSCG00000027274	Exon 4	PSMA1
GL895994.1	57431	57431	Insertion	4	○	●	○	○	○	○	○	○	○	○	Frameshift	ENSSSCT00000032121	ENSSSCG00000029571	Exon 12	AVIL
GL896025.2	9332	9337	Deletion	6	○	○	●	○	○	○	○	○	○	○	Frameshift	ENSSSCT00000027071	ENSSSCG00000025054	Exon 9	EVA1A
GL896193.2	13751	13751	Insertion	14	○	●	○	○	○	○	○	○	○	○	Frameshift	ENSSSCT00000032123	ENSSSCG00000025801	Exon 1
GL896267.1	19770	19770	Insertion	12	○	○	●	○	○	○	○	○	○	○	Nonframeshift	ENSSSCT00000022566	ENSSSCG00000026700	Exon 4	RBM23
GL896299.1	6157	6157	Insertion	12	○	○	○	●	●	●	○	○	○	○	Nonframeshift	ENSSSCT00000029933	ENSSSCG00000024383	Exon 6	RP11-298I3.5
GL896313.1	3212	3214	Deletion	3	●	○	○	○	○	○	○	○	○	○	Nonframeshift	ENSSSCT00000023459	ENSSSCG00000025259	Exon 1	SPATA31E1
GL896405.1	35288	35288	Deletion	1	○	●	○	○	○	○	○	○	○	○	Frameshift	ENSSSCT00000031591	ENSSSCG00000020686	Exon 15	SDHA
GL896420.2	6172	6172	Insertion	3	○	○	○	○	○	○	○	●	○	●	Nonframeshift	ENSSSCT00000030182	ENSSSCG00000021541	Exon 7	DCAF5
GL896494.1	8799	8799	Insertion	1	○	○	○	●	○	○	○	○	○	○	Frameshift	ENSSSCT00000024402	ENSSSCG00000020884	Exon 14	GPR179
JH118403.1	47878	47878	Insertion	1	●	○	○	○	●	○	○	○	○	○	Frameshift	ENSSSCT00000031870	ENSSSCG00000027863	Exon 3	OPN5
JH118468.1	5313	5314	Deletion	2	○	○	○	○	○	○	○	●	○	○	Frameshift	ENSSSCT00000031371	ENSSSCG00000026102	Exon 2
JH118527.1	936	938	Deletion	3	○	●	○	○	○	○	○	○	○	○	Nonframeshift	ENSSSCT00000024770	ENSSSCG00000022133	Exon 10	RAB17
JH118575.1	69664	69667	Deletion	4	○	●	○	○	○	○	○	○	○	○	Frameshift	ENSSSCT00000031313	ENSSSCG00000027904	Exon 1	CCDC92
JH118589.1	37304	37304	Deletion	1	○	○	○	○	●	○	○	○	○	○	Frameshift	ENSSSCT00000003325	ENSSSCG00000002993	Exon 4	CYP2A6
JH118647.1	207431	207442	Deletion	12	○	○	○	○	●	○	○	○	○	○	Nonframeshift	ENSSSCT00000025000	ENSSSCG00000021708	Exon 1	FAU
JH118667.1	128545	128545	Insertion	1	○	○	○	○	○	○	●	○	○	○	Frameshift	ENSSSCT00000027034	ENSSSCG00000025888	Exon 11	ROBO2
JH118669.1	112207	112207	Deletion	1	○	○	●	○	○	○	○	○	●	○	Frameshift	ENSSSCT00000031671	ENSSSCG00000027717	Exon 3
JH118674.1	44673	44673	Insertion	1	○	○	○	○	○	○	○	○	○	●	Frameshift	ENSSSCT00000030439	ENSSSCG00000024560	Exon 5	GRIA1
JH118703.1	88280	88280	Insertion	2	○	○	○	○	○	○	○	○	●	○	Frameshift	ENSSSCT00000029159	ENSSSCG00000030459	Exon 4	RBBP8
JH118716.1	37092	37092	Insertion	2	○	○	○	○	●	○	○	○	○	○	Frameshift	ENSSSCT00000023799	ENSSSCG00000025992	Exon 18	ENPP3
JH118721.1	183587	183591	Deletion	5	●	○	○	○	○	○	○	○	○	○	Frameshift	ENSSSCT00000026644	ENSSSCG00000024256	Exon 6	TRMT10A
JH118727.1	34215	34217	Deletion	3	○	○	○	○	●	○	○	○	○	○	Nonframeshift	ENSSSCT00000029117	ENSSSCG00000025620	Exon 12	PRICKLE1
JH118748.1	31364	31364	Deletion	1	○	○	○	○	○	○	●	○	○	○	Frameshift	ENSSSCT00000024528	ENSSSCG00000022000	Exon 41	COL1A2
JH118759.1	23831	23831	Insertion	1	○	○	●	●	●	○	○	○	●	○	Frameshift	ENSSSCT00000032211	ENSSSCG00000027186	Exon 6
JH118759.1	23870	23870	Insertion	1	○	○	●	●	○	○	○	○	●	○	Frameshift	ENSSSCT00000032211	ENSSSCG00000027186	Exon 6
JH118811.1	3406	3414	Deletion	9	○	●	●	○	○	○	○	○	○	○	Frameshift	ENSSSCT00000026156	ENSSSCG00000028880	Exon 22	LOXL1
JH118839.1	106048	106048	Deletion	1	○	○	○	○	○	○	○	●	○	○	Frameshift	ENSSSCT00000024235	ENSSSCG00000026089	Exon 10	CRTAC1
JH118861.1	153802	153802	Insertion	8	●	○	○	○	○	○	○	○	○	○	Frameshift	ENSSSCT00000030272	ENSSSCG00000022040	Exon 18	RPA1
JH118905.1	246857	246857	Insertion	1	○	○	○	○	○	○	○	○	○	●	Frameshift	ENSSSCT00000029767	ENSSSCG00000020807	Exon 1
JH118921.1	16857	16859	Deletion	3	○	●	○	○	○	○	○	○	○	○	Nonframeshift	ENSSSCT00000028699	ENSSSCG00000021433	Exon 1
JH118928.1	28321	28329	Deletion	9	●	●	○	○	○	○	●	●	○	○	Nonframeshift	ENSSSCT00000000467	ENSSSCG00000000433	Exon 3	B4GALNT1
JH118928.1	95867	95878	Deletion	12	●	●	○	○	○	○	○	○	○	○	Nonframeshift	ENSSSCT00000022510	ENSSSCG00000000430	Exon 1	DCTN2
JH118931.1	17996	17998	Deletion	3	○	●	●	○	●	○	○	○	○	○	Nonframeshift	ENSSSCT00000027490	ENSSSCG00000028800	Exon 2	CMYA5
JH118931.1	23189	23189	Insertion	15	○	●	●	●	●	○	○	○	●	○	Stopgain	ENSSSCT00000027490	ENSSSCG00000028800	Exon 3	CMYA5
JH118944.1	524272	524273	Deletion	2	○	●	○	○	○	○	○	○	○	○	Frameshift	ENSSSCT00000026520	ENSSSCG00000022918	Exon 24	DOCK10
JH118944.1	545400	545408	Deletion	9	○	○	○	○	○	●	○	○	○	○	Frameshift	ENSSSCT00000026520	ENSSSCG00000022918	Exon 8	DOCK10
JH118979.1	60084	60084	Deletion	1	○	○	○	○	○	○	○	○	○	●	Frameshift	ENSSSCT00000025855	ENSSSCG00000030542	Exon 1	C12orf71
JH118994.1	52756	52770	Deletion	15	○	○	○	○	○	○	○	○	○	●	Nonframeshift	ENSSSCT00000026570	ENSSSCG00000028330	Exon 1	APOB
X	6595955	6595955	Deletion	1	○	○	○	○	○	○	○	●	●	●	Frameshift	ENSSSCT00000034091	ENSSSCG00000012104	Exon 1	SHROOM2
X	6745269	6745269	Insertion	3	○	●	●	●	●	○	○	○	○	○	Nonframeshift	ENSSSCT00000034091	ENSSSCG00000012104	Exon 4	SHROOM2
X	6782164	6782164	Insertion	6	○	●	●	○	●	●	○	○	○	○	Nonframeshift	ENSSSCT00000034091	ENSSSCG00000012104	Exon 6	SHROOM2
X	11302657	11302667	Deletion	11	○	●	○	●	○	○	○	○	○	○	Nonframeshift	ENSSSCT00000032916	ENSSSCG00000012123	Exon 1	RAB9A
X	14386889	14386889	Deletion	1	○	●	○	○	○	○	○	●	○	○	Frameshift	ENSSSCT00000034223	ENSSSCG00000012150	Exon 1	REPS2
X	14455787	14455787	Insertion	1	●	●	●	●	●	○	●	●	○	○	Frameshift	ENSSSCT00000034223	ENSSSCG00000012150	Exon 2	REPS2
X	21755686	21755686	Insertion	3	○	○	●	●	○	○	○	○	○	○	Nonframeshift	ENSSSCT00000025740	ENSSSCG00000021032	Exon 3
X	21910538	21910538	Insertion	9	●	○	○	○	○	○	○	○	○	○	Nonframeshift	ENSSSCT00000032809	ENSSSCG00000030735	Exon 1
X	22220925	22220925	Deletion	1	●	○	●	●	●	○	○	○	○	○	Frameshift	ENSSSCT00000035302	ENSSSCG00000012182	Exon 1	PCYT1B
X	43540223	43540223	Deletion	1	○	●	●	●	●	●	●	○	●	●	Frameshift	ENSSSCT00000025931	ENSSSCG00000029656	Exon 2	NDP
X	43901747	43901751	Deletion	5	○	○	○	○	○	○	●	○	●	○	Frameshift	ENSSSCT00000032343	ENSSSCG00000025444	Exon 3	EFHC2
X	44479944	44479944	Insertion	3	○	○	○	●	○	○	○	○	○	○	Nonframeshift	ENSSSCT00000013408	ENSSSCG00000023500	Exon 1	DUSP21
X	44567698	44567698	Insertion	3	●	●	●	●	○	○	○	●	○	○	Nonframeshift	ENSSSCT00000013409	ENSSSCG00000012262	Exon 1	KDM6A
X	47303987	47303998	Deletion	12	○	●	○	○	○	○	○	○	○	○	Frameshift	ENSSSCT00000013428	ENSSSCG00000012279	Exon 9	ELK1
X	47304000	47304008	Deletion	9	○	○	○	○	○	○	○	○	●	○	Nonframeshift	ENSSSCT00000013428	ENSSSCG00000012279	Exon 1	ELK1
X	47893351	47893351	Deletion	1	○	●	●	●	●	●	●	●	●	●	Frameshift	ENSSSCT00000025387	ENSSSCG00000021328	Exon 1	PCSK1N
X	47893418	47893418	Deletion	1	○	●	●	●	○	●	○	○	○	○	Frameshift	ENSSSCT00000025387	ENSSSCG00000021328	Exon 1	PCSK1N
X	48881730	48881730	Insertion	3	○	○	○	●	○	○	○	○	○	○	Nonframeshift	ENSSSCT00000013457	ENSSSCG00000012307	Exon 4	CCNB3
X	49305905	49305905	Deletion	1	●	●	●	●	●	○	●	●	●	●	Frameshift	ENSSSCT00000013460	ENSSSCG00000012309	Exon 2	SHROOM4
X	51409885	51409885	Insertion	3	○	●	●	●	●	○	○	○	○	○	Nonframeshift	ENSSSCT00000013476	ENSSSCG00000012323	Exon 1	TSPYL2
X	58377675	58377675	Insertion	1	○	●	○	●	●	○	○	○	●	●	Frameshift	ENSSSCT00000013523	ENSSSCG00000012366	Exon 22	LAS1L
X	58380830	58380832	Deletion	3	●	○	○	○	○	○	○	○	○	○	Nonframeshift	ENSSSCT00000013523	ENSSSCG00000012366	Exon 21	LAS1L
X	58395798	58395798	Insertion	2	●	○	○	○	○	○	○	○	○	○	Frameshift	ENSSSCT00000013523	ENSSSCG00000012366	Exon 10	LAS1L
X	64703146	64703146	Insertion	6	○	○	○	○	○	○	○	○	○	●	Nonframeshift	ENSSSCT00000013554	ENSSSCG00000012396	Exon 43	MED12
X	65725681	65725681	Insertion	6	○	●	●	●	●	○	○	○	○	○	Nonframeshift	ENSSSCT00000022492	ENSSSCG00000020876	Exon 1	RGAG4
X	65736906	65736906	Deletion	1	●	●	●	●	●	●	●	●	●	●	Frameshift	ENSSSCT00000013568	ENSSSCG00000012408	Exon 3	NHSL2
X	90606825	90606826	Deletion	2	●	●	●	●	●	○	○	○	○	○	Frameshift	ENSSSCT00000035890	ENSSSCG00000012488	Exon 3	ARL13A
X	90608183	90608185	Deletion	3	●	●	●	●	●	○	○	○	○	○	Nonframeshift	ENSSSCT00000035890	ENSSSCG00000012488	Exon 4	ARL13A
X	92752217	92752217	Insertion	9	○	○	○	○	●	○	○	○	○	○	Nonframeshift	ENSSSCT00000013672	ENSSSCG00000012504	Exon 1	NAP1L3
X	98090181	98090181	Insertion	3	●	○	○	○	○	○	○	○	○	○	Nonframeshift	ENSSSCT00000013697	ENSSSCG00000012528	Exon 1	NGFRAP1
X	109466171	109466171	Insertion	3	○	○	●	●	○	○	○	○	○	●	Nonframeshift	ENSSSCT00000013777	ENSSSCG00000012598	Exon 1
X	112643936	112643936	Insertion	5	●	○	○	○	●	○	○	○	○	○	Frameshift	ENSSSCT00000013781	ENSSSCG00000012602	Exon 1	C1GALT1C1
X	113322936	113322944	Deletion	9	○	○	●	○	○	○	○	○	○	○	Nonframeshift	ENSSSCT00000031049	ENSSSCG00000024056	Exon 2
X	113322936	113322950	Deletion	15	○	○	○	○	○	○	●	○	●	○	Nonframeshift	ENSSSCT00000031049	ENSSSCG00000024056	Exon 2
X	114504891	114504891	Insertion	1	●	○	○	○	●	●	●	●	●	●	Frameshift	ENSSSCT00000013815	ENSSSCG00000012634	Exon 26	DOCK11
X	124222301	124222301	Deletion	1	●	○	○	●	○	●	○	○	○	○	Stopgain	ENSSSCT00000031926	ENSSSCG00000021205	Exon 2	STK26
X	126772012	126772012	Insertion	1	●	○	○	○	○	○	○	○	○	○	Frameshift	ENSSSCT00000013874	ENSSSCG00000012691	Exon 1
X	126772028	126772028	Insertion	1	●	○	○	○	○	○	○	○	○	○	Frameshift	ENSSSCT00000013874	ENSSSCG00000012691	Exon 1
X	127302656	127302656	Insertion	3	●	●	○	○	○	○	○	○	○	○	Nonframeshift	ENSSSCT00000013885	ENSSSCG00000012700	Exon 14	MAP7D3
X	127322360	127322368	Deletion	9	○	●	○	○	○	○	○	○	○	○	Nonframeshift	ENSSSCT00000013885	ENSSSCG00000012700	Exon 7	MAP7D3
X	127499491	127499496	Deletion	6	○	●	○	○	●	○	○	○	○	○	Nonframeshift	ENSSSCT00000022638	ENSSSCG00000023062	Exon 9	HTATSF1
X	130467780	130467780	Insertion	1	●	○	○	○	●	●	●	●	●	●	Frameshift	ENSSSCT00000013898	ENSSSCG00000012712	Exon 26	MCF2
X	136606262	136606262	Insertion	1	●	●	●	●	●	●	○	●	●	●	Frameshift	ENSSSCT00000013912	ENSSSCG00000012725	Exon 2
X	138714363	138714363	Insertion	12	○	○	●	○	○	○	○	○	○	○	Nonframeshift	ENSSSCT00000013917	ENSSSCG00000012730	Exon 13	AFF2
X	140009851	140009859	Deletion	9	○	○	○	○	○	○	●	○	○	○	Nonframeshift	ENSSSCT00000013932	ENSSSCG00000012743	Exon 1	MTMR1
X	142014238	142014238	Insertion	2	○	●	●	○	○	○	○	○	●	●	Frameshift	ENSSSCT00000013962	ENSSSCG00000012771	Exon 11	AC136616.1
X	142285323	142285323	Insertion	6	○	○	●	●	○	○	○	●	●	●	Nonframeshift	ENSSSCT00000013987	ENSSSCG00000012795	Exon 12	IRAK1
X	143255038	143255038	Insertion	3	○	○	○	○	○	○	○	○	●	●	Nonframeshift	ENSSSCT00000014017	ENSSSCG00000012823	Exon 13	DKC1
X	144146520	144146523	Deletion	4	○	○	○	●	○	○	●	○	○	○	Frameshift	ENSSSCT00000014028	ENSSSCG00000012833	Exon 6	PRKX
