# Supplementary material for: Comprehensive variation discovery and recovery of missing sequence in the pig genome using multiple de novo assemblies
Source: HighWire-hosted journal article supplement (doi:10.1101/gr.207456.116), 2016-09-19
Supplement: Supplemental_Table_S12.xlsx [file Supplemental_Table_S12.xlsx]

## Sheet: Supplemental Table S12
Supplemental Table S12. List of breed-specific selected regions.
Chromosome	Start	End	Length (bp)	P value	FDR value	Breed	Gene ID	Gene symbol
1	2630001	2660000	30000	0.0005094	0.00297305	Large White	ENSSSCG00000004017	FRMD1
1	3880001	3910000	30000	0.0004631	0.00276175	Hampshire
1	3980001	4010000	30000	0.0004631	0.00276175	Hampshire
1	6400001	6430000	30000	0.0058811	0.0177118	Tibetan wild boar	ENSSSCG00000004029	QKI
1	11530001	11590000	60000	3e-07	6.24e-06	Tibetan wild boar	ENSSSCG00000024528	ZDHHC14
1	25460001	25490000	30000	0.0048621	0.0156149	Meishan
1	30210001	30240000	30000	0.0058811	0.0177118	Tibetan wild boar
1	61180001	61210000	30000	0.0058811	0.0177118	Tibetan wild boar
1	62430001	62460000	30000	0.0095833	0.0263993	Jinhua	ENSSSCG00000004300, ENSSSCG00000004301	C6orf163, SMIM8, C6orf164
1	62920001	62960000	40000	0.0001277	0.00095462	Jinhua
1	77030001	77060000	30000	0.0058811	0.0177118	Tibetan wild boar
1	89150001	89190000	40000	7.5e-06	8.5e-05	Bamei
1	90070001	90100000	30000	0.0059771	0.0179113	Rongchang
1	105260001	105300000	40000	2.3e-06	2.88e-05	Hampshire
1	105320001	105350000	30000	0.0004631	0.00276175	Hampshire	ENSSSCG00000004491	SLC14A2
1	142900001	142930000	30000	0.0095833	0.0263993	Jinhua	ENSSSCG00000004708	TUBGCP4
1	150770001	150810000	40000	1e-07	2.72e-06	Piétrain
1	175320001	175350000	30000	0.0095833	0.0263993	Jinhua	ENSSSCG00000004888, ENSSSCG00000004889	SERPINB8, SERPINB10
1	175480001	175510000	30000	0.0095833	0.0263993	Jinhua	ENSSSCG00000004890	SERPINB2
1	189420001	189500000	80000	0	0	Berkshire
1	193700001	193740000	40000	6.48e-05	0.000536768	Tibetan wild boar
1	194440001	194470000	30000	0.0059771	0.0179113	Rongchang
1	194490001	194530000	40000	6.41e-05	0.000532324	Rongchang	ENSSSCG00000004992	FSCB
1	198400001	198510000	110000	0	0	Berkshire
1	207220001	207250000	30000	0.0048621	0.0156149	Meishan
1	210410001	210440000	30000	0.0048621	0.0156149	Meishan
1	214800001	214880000	80000	0	0	Rongchang
1	217900001	217930000	30000	0.0095833	0.0263993	Jinhua
1	233670001	233730000	60000	0	0	Hampshire	ENSSSCG00000005193	TYRP1
1	238540001	238580000	40000	2.3e-06	2.88e-05	Hampshire
1	243520001	243550000	30000	0.0048621	0.0156149	Meishan
1	243760001	243800000	40000	1.6e-06	2.22e-05	Large White
1	244250001	244310000	60000	7e-07	1.16e-05	Jinhua	ENSSSCG00000025229	RFX3
1	245290001	245320000	30000	0.0058811	0.0177118	Tibetan wild boar
1	249370001	249420000	50000	2.72e-05	0.000260985	Meishan	ENSSSCG00000005251	C9orf135
1	249460001	249490000	30000	0.0048621	0.0156149	Meishan	ENSSSCG00000005252	PTAR1
1	272210001	272250000	40000	1.7e-06	2.32e-05	Landrace
1	272460001	272490000	30000	0.0048621	0.0156149	Meishan
1	272600001	272630000	30000	0.0048621	0.0156149	Meishan
1	282910001	282960000	50000	6.16e-05	0.000516267	Jinhua
1	295090001	295120000	30000	0.0004095	0.00250533	Berkshire	ENSSSCG00000027082	OR1J4
1	295140001	295170000	30000	0.0004095	0.00250533	Berkshire
1	295250001	295280000	30000	0.0004095	0.00250533	Berkshire	ENSSSCG00000027732	OR1J4
1	301650001	301680000	30000	0.0004095	0.00250533	Berkshire	ENSSSCG00000005607	RALGPS1
1	306140001	306180000	40000	6.41e-05	0.000532324	Rongchang	ENSSSCG00000005723, ENSSSCG00000005724	SETX, NTNG2
1	308610001	308640000	30000	0.0059771	0.0179113	Rongchang	ENSSSCG00000005761, ENSSSCG00000005760, ENSSSCG00000005759	PPP1R26, C9orf116, MRPS2
1	311150001	311180000	30000	3.21e-05	0.000301774	Piétrain
2	20600001	20640000	40000	0.0005599	0.00259065	Rongchang	ENSSSCG00000013284	TTC17
2	24670001	24710000	40000	0.0022412	0.00743208	Tibetan wild boar
2	27930001	27970000	40000	0.0001153	0.000719657	Bamei	ENSSSCG00000028338	PAMR1
2	35130001	35160000	30000	0.0007387	0.00322608	Hampshire
2	35720001	35790000	70000	1e-07	1.76e-06	Meishan
2	39540001	39580000	40000	0.0022412	0.00743208	Tibetan wild boar
2	40280001	40330000	50000	0.0004335	0.00215643	Meishan	ENSSSCG00000013343	SLC17A6
2	40500001	40610000	110000	0	0	Meishan
2	41050001	41130000	80000	0	0	Meishan
2	41360001	41390000	30000	0.0057214	0.0159377	Jinhua
2	42530001	42560000	30000	0.0057214	0.0159377	Jinhua
2	42670001	42730000	60000	3.5e-05	0.000260057	Tibetan wild boar
2	53330001	53370000	40000	0.0022412	0.00743208	Tibetan wild boar	ENSSSCG00000013413	TBC1D3B, TBC1D3C, TBC1D3K, TBC1D3E, TBC1D3F, TBC1D3G, TBC1D3I, TBC1D3, TBC1D3L, TBC1D26, TBC1D28, AC003976.2
2	56540001	56610000	70000	8e-07	1.15e-05	Tibetan wild boar	ENSSSCG00000013955	OR11L1
2	58040001	58130000	90000	0	0	Tibetan wild boar
2	60990001	61030000	40000	0.0022412	0.00743208	Tibetan wild boar	ENSSSCG00000013856, ENSSSCG00000013855	FAM32A, AP1M1
2	62150001	62210000	60000	6e-06	5.75e-05	Rongchang	ENSSSCG00000013833, ENSSSCG00000013831	SLC1A6
2	62270001	62310000	40000	0.0005599	0.00259065	Rongchang	ENSSSCG00000025945, ENSSSCG00000029953	OR7A10, OR7A5, OR7A17
2	75150001	75190000	40000	0.0022412	0.00743208	Tibetan wild boar	ENSSSCG00000027127	MAP2K2
2	82690001	82730000	40000	0.0022412	0.00743208	Tibetan wild boar	ENSSSCG00000014049	UNC5A
2	88180001	88220000	40000	7.86e-05	0.000527342	Jinhua	ENSSSCG00000014100	TBCA
2	96070001	96150000	80000	0	0	Rongchang
2	108990001	109030000	40000	0.0008658	0.00363606	Meishan	ENSSSCG00000014177	CHD1
2	114130001	114180000	50000	4.02e-05	0.000292648	Jinhua
2	116370001	116410000	40000	0.0005599	0.00259065	Rongchang
2	121710001	121750000	40000	8e-07	1.15e-05	Berkshire
2	123030001	123060000	30000	0.0005362	0.00251392	Landrace
2	127550001	127580000	30000	0.0007387	0.00322608	Hampshire
2	129850001	129920000	70000	0	0	Large White	ENSSSCG00000014229	PRR16
2	129960001	130000000	40000	1.8e-06	2.25e-05	Large White
2	132180001	132240000	60000	6e-07	8.93e-06	Jinhua	ENSSSCG00000014239	CEP120
2	139210001	139240000	30000	0.0057214	0.0159377	Jinhua	ENSSSCG00000014268
2	139540001	139620000	80000	0	0	Hampshire	ENSSSCG00000014271, ENSSSCG00000014272	ACSL6
2	145910001	145940000	30000	0.0076847	0.0203183	Bamei	ENSSSCG00000014326, ENSSSCG00000014325	CDC23, KIF20A
2	152780001	152810000	30000	0.0076847	0.0203183	Bamei
2	153860001	153890000	30000	0.0005362	0.00251392	Landrace	ENSSSCG00000014410, ENSSSCG00000014411	LARS
2	157760001	157790000	30000	0.0057214	0.0159377	Jinhua	ENSSSCG00000014438	PDE6A
2	159980001	160020000	40000	0.0022412	0.00743208	Tibetan wild boar
2	161230001	161270000	40000	0.0008658	0.00363606	Meishan	ENSSSCG00000021127
2	161400001	161440000	40000	0.0005599	0.00259065	Rongchang	ENSSSCG00000020815	OR2T4, OR2T5, OR2T29
3	1020001	1050000	30000	0.0121601	0.0374502	Jinhua
3	5410001	5440000	30000	7.25e-05	0.000730867	Landrace	ENSSSCG00000007599, ENSSSCG00000007602	BAIAP2L1, LMTK2
3	7310001	7350000	40000	0.0002584	0.00189154	Tibetan wild boar	ENSSSCG00000007650, ENSSSCG00000007649, ENSSSCG00000007648	STAG3, GPC2, GAL3ST4
3	7360001	7390000	30000	4.07e-05	0.000478261	Large White	ENSSSCG00000007648, ENSSSCG00000007647, ENSSSCG00000007646	LAMTOR4, C7orf43, GAL3ST4
3	10200001	10250000	50000	7.79e-05	0.000768254	Bamei	ENSSSCG00000007700	HIP1
3	10280001	10310000	30000	0.0088596	0.0293934	Bamei	ENSSSCG00000007700, ENSSSCG00000007705	POM121, POM121C, HIP1
3	14140001	14170000	30000	0.0088596	0.0293934	Bamei
3	14390001	14420000	30000	0.0121601	0.0374502	Jinhua
3	16950001	16990000	40000	0.0002252	0.00168246	Jinhua	ENSSSCG00000028513
3	17280001	17310000	30000	0.0121601	0.0374502	Jinhua	ENSSSCG00000007751	2016-09-14
3	18690001	18730000	40000	2.8e-06	5.25e-05	Hampshire	ENSSSCG00000021845, ENSSSCG00000007803, ENSSSCG00000007804, ENSSSCG00000007805	ATXN2L, ATP2A1, TUFM, SH2B1
3	20180001	20240000	60000	0	0	Meishan
3	38330001	38380000	50000	0.0001309	0.00106418	Tibetan wild boar	ENSSSCG00000007920, ENSSSCG00000007919, ENSSSCG00000025072, ENSSSCG00000007925	C16orf89, NAGPA, ALG1L, FAM86B2, FAM86A, ALG1, FAM86C1, FAM86B1, ALG1L2
3	46470001	46510000	40000	0.0001505	0.001179	Bamei
3	54230001	54260000	30000	0.0121601	0.0374502	Jinhua	ENSSSCG00000008155, ENSSSCG00000008157	SLC9A4, IL18RAP
3	55770001	55800000	30000	0.0135632	0.0406214	Tibetan wild boar	ENSSSCG00000008170, ENSSSCG00000008169	TBC1D8, RPL31
3	61640001	61700000	60000	0	0	Piétrain
3	66110001	66140000	30000	0.0088596	0.0293934	Bamei
3	71020001	71050000	30000	0.0135632	0.0406214	Tibetan wild boar
3	79670001	79720000	50000	0	0	Large White
3	79840001	79870000	30000	0.0011261	0.00651299	Meishan
3	94340001	94380000	40000	0.0002584	0.00189154	Tibetan wild boar
3	94660001	94690000	30000	0.0135632	0.0406214	Tibetan wild boar
3	129270001	129300000	30000	5.44e-05	0.000592474	Rongchang	ENSSSCG00000008617	FAM49A
3	136000001	136030000	30000	0.0121601	0.0374502	Jinhua
4	5880001	5910000	30000	0.0026704	0.0106573	Meishan
4	14120001	14150000	30000	0.0045465	0.0154177	Tibetan wild boar
4	22550001	22580000	30000	0.0089506	0.0243565	Jinhua
4	26350001	26390000	40000	0.0001508	0.000953177	Jinhua
4	37660001	37690000	30000	0.0026704	0.0106573	Meishan	ENSSSCG00000024200, ENSSSCG00000006058	RRM2B, UBR5
4	63200001	63240000	40000	3.58e-05	0.000303178	Hampshire
4	64280001	64310000	30000	0.0031957	0.012092	Hampshire
4	64490001	64520000	30000	0.0031957	0.012092	Hampshire
4	64730001	64760000	30000	0.0031957	0.012092	Hampshire	ENSSSCG00000006168	PEX2
4	64950001	64980000	30000	0.0031957	0.012092	Hampshire	ENSSSCG00000006169	ZFHX4
4	75660001	75690000	30000	0.0013242	0.00616178	Bamei
4	78570001	78600000	30000	0.0026704	0.0106573	Meishan	ENSSSCG00000006230	CLVS1
4	80990001	81020000	30000	0.0013242	0.00616178	Bamei
4	82370001	82410000	40000	1.09e-05	0.000103912	Bamei
4	88190001	88240000	50000	7.62e-05	0.000566188	Jinhua
4	93280001	93330000	50000	0	0	Large White	ENSSSCG00000006329	LMX1A
4	93440001	93470000	30000	0.000123	0.000823269	Landrace
4	94470001	94500000	30000	0.0002235	0.00132854	Piétrain
4	99400001	99430000	30000	0.0018188	0.00796533	Berkshire	ENSSSCG00000006418	MNDA
4	106720001	106760000	40000	5.96e-05	0.00046634	Tibetan wild boar	ENSSSCG00000006619, ENSSSCG00000006618	CELF3, SNX27
4	129910001	129940000	30000	0.0041869	0.0144895	Rongchang	ENSSSCG00000006873, ENSSSCG00000006874	PALMD, FRRS1
4	130980001	131010000	30000	0.0041869	0.0144895	Rongchang
4	139250001	139280000	30000	0.0089506	0.0243565	Jinhua	ENSSSCG00000030801	GBP6
4	141430001	141470000	40000	5.55e-05	0.000440025	Rongchang
5	1580001	1620000	40000	8e-07	1.73e-05	Large White
5	1640001	1720000	80000	0	0	Large White	ENSSSCG00000000020, ENSSSCG00000000021	PRR5-ARHGAP8, ARHGAP8, PHF21B
5	2530001	2580000	50000	2.15e-05	0.000254132	Hampshire	ENSSSCG00000000026, ENSSSCG00000000028	EFCAB6, SULT4A1
5	4860001	4890000	30000	0.002108	0.00836082	Bamei	ENSSSCG00000000073
5	11860001	11900000	40000	9.78e-05	0.0006821	Rongchang
5	21990001	22020000	30000	0.002108	0.00836082	Bamei	ENSSSCG00000000334	OR6C68
5	32650001	32690000	40000	4.36e-05	0.000428682	Hampshire
5	33850001	33880000	30000	0.0005825	0.00293445	Piétrain	ENSSSCG00000000475	IRAK3
5	36970001	37000000	30000	0.0036371	0.0125874	Hampshire
5	39850001	39890000	40000	4.36e-05	0.000428682	Hampshire
5	46230001	46260000	30000	0.0095132	0.0256941	Jinhua
5	46600001	46630000	30000	0.0095132	0.0256941	Jinhua
5	46670001	46700000	30000	0.0095132	0.0256941	Jinhua
5	50260001	50290000	30000	0.0095132	0.0256941	Jinhua	ENSSSCG00000000552, ENSSSCG00000000553	MED21, TM7SF3
5	54710001	54780000	70000	0	0	Hampshire	ENSSSCG00000026594, ENSSSCG00000000572	CMAS, SULT6B1
5	62930001	62980000	50000	1.7e-06	3.14e-05	Piétrain
5	63870001	63950000	80000	0	0	Piétrain
5	77600001	77640000	40000	0.0001791	0.00111028	Jinhua	ENSSSCG00000000800	PUS7L
5	94330001	94400000	70000	0	0	Piétrain
5	97230001	97300000	70000	0	0	Rongchang
6	18600001	18680000	80000	0	0	Landrace
6	20850001	20880000	30000	0.0023134	0.00796296	Rongchang
6	27500001	27530000	30000	0.0127099	0.0309545	Jinhua	ENSSSCG00000002828, ENSSSCG00000002829	MMP2, LPCAT2
6	35000001	35050000	50000	0.0001245	0.000759733	Jinhua	ENSSSCG00000002854	POP4
6	52560001	52600000	40000	3e-07	6.2e-06	Large White
6	59490001	59540000	50000	1.38e-05	0.000139619	Meishan
6	60540001	60570000	30000	0.0010921	0.00441736	Hampshire
6	64960001	64990000	30000	0.0004446	0.00214118	Landrace
6	65800001	65830000	30000	0.0023134	0.00796296	Rongchang	ENSSSCG00000003429, ENSSSCG00000003430	CLCN6, NPPA
6	68310001	68350000	40000	2.2e-06	3.3e-05	Landrace
6	84900001	84930000	30000	0.0127099	0.0309545	Jinhua	ENSSSCG00000025371	EYA3
6	89770001	89800000	30000	0.0010921	0.00441736	Hampshire	ENSSSCG00000027417	LDLRAD4
6	107930001	107960000	30000	0.0127099	0.0309545	Jinhua	ENSSSCG00000020740	DSG4
6	110450001	110480000	30000	0.0026375	0.00882569	Meishan
6	110630001	110660000	30000	0.0023134	0.00796296	Rongchang
6	112290001	112360000	70000	0	0	Tibetan wild boar	ENSSSCG00000027700	RPRD1A
6	113240001	113270000	30000	0.0023134	0.00796296	Rongchang	ENSSSCG00000026953	TPGS2
6	130500001	130540000	40000	9.4e-06	0.000101215	Hampshire
6	142540001	142570000	30000	0.0004039	0.00198112	Piétrain
6	155680001	155720000	40000	2.6e-06	3.74e-05	Piétrain	ENSSSCG00000003963
7	10840001	10860000	20000	0.0067041	0.0247994	Large White
7	28800001	28840000	40000	7.45e-05	0.000974737	Piétrain	ENSSSCG00000030874, ENSSSCG00000030126
7	31320001	31410000	90000	0	0	Piétrain	ENSSSCG00000001486	LRRC1
7	32090001	32120000	30000	0.0053504	0.0216388	Piétrain	ENSSSCG00000001490	KHDRBS2
7	34680001	34720000	40000	0.0078079	0.0273152	Jinhua
7	35530001	35570000	40000	0.0078079	0.0273152	Jinhua	ENSSSCG00000001532, ENSSSCG00000001533, ENSSSCG00000001534	TAF11, UHRF1BP1, ANKS1A
7	37200001	37240000	40000	0.0078079	0.0273152	Jinhua	ENSSSCG00000001564	SRSF3
7	38190001	38220000	30000	0.0053504	0.0216388	Piétrain
7	39000001	39040000	40000	7.45e-05	0.000974737	Piétrain	ENSSSCG00000030073	BTBD9
7	50230001	50270000	40000	7.45e-05	0.000974737	Piétrain
7	52440001	52460000	20000	0.0116193	0.0350538	Berkshire	ENSSSCG00000001748	IL17A
7	59230001	59290000	60000	4e-07	1.21e-05	Bamei	ENSSSCG00000001830	MYADM
7	64770001	64800000	30000	0.0053504	0.0216388	Piétrain	ENSSSCG00000001921	NEO1
7	72000001	72020000	20000	0.0116193	0.0350538	Berkshire	ENSSSCG00000001965	AKAP6
7	74820001	74850000	30000	0.0051965	0.0212951	Rongchang
7	76690001	76750000	60000	7.32e-05	0.000964324	Tibetan wild boar
7	84080001	84130000	50000	0.0040224	0.0183394	Jinhua	ENSSSCG00000021853, ENSSSCG00000021120	OR4K2
7	84150001	84210000	60000	0.000183	0.00182679	Jinhua	ENSSSCG00000002170, ENSSSCG00000029164, ENSSSCG00000025807, ENSSSCG00000002172	AC171558.1, OR4M2, OR4M1
7	84490001	84530000	40000	0.0078079	0.0273152	Jinhua	ENSSSCG00000022263
7	88850001	88890000	40000	3.6e-05	0.000590658	Bamei
7	115140001	115170000	30000	0.0011748	0.00825684	Meishan
7	120070001	120100000	30000	0.0011748	0.00825684	Meishan	ENSSSCG00000002444	FBLN5
7	124200001	124230000	30000	0.0051965	0.0212951	Rongchang
7	129260001	129290000	30000	0.0051965	0.0212951	Rongchang	ENSSSCG00000002527, ENSSSCG00000024055	TECPR2, ANKRD9
7	129320001	129370000	50000	3.79e-05	0.000614133	Rongchang	ENSSSCG00000024055, ENSSSCG00000002529, ENSSSCG00000002528	TECPR2, RPS21
7	131790001	131830000	40000	0.0078079	0.0273152	Jinhua	ENSSSCG00000002572
7	131850001	131890000	40000	0.0078079	0.0273152	Jinhua
7	132560001	132640000	80000	2.6e-06	6e-05	Jinhua	ENSSSCG00000022480
7	132800001	132840000	40000	0.0078079	0.0273152	Jinhua	ENSSSCG00000030059
7	133320001	133430000	110000	0	0	Jinhua	ENSSSCG00000022889, ENSSSCG00000002589, ENSSSCG00000028594, ENSSSCG00000021230, ENSSSCG00000029804	OR4K15, OR4K14, OR4Q2
8	1240001	1290000	50000	7.4e-05	0.000470365	Rongchang	ENSSSCG00000008692, ENSSSCG00000008695	MFSD10, ADD1
8	1820001	1850000	30000	0.008435	0.0199493	Rongchang	ENSSSCG00000008701	LRPAP1
8	1990001	2020000	30000	0.008435	0.0199493	Rongchang
8	3370001	3400000	30000	0.0134948	0.0277867	Meishan	ENSSSCG00000027349, ENSSSCG00000028085, ENSSSCG00000029624, ENSSSCG00000022867	GRPEL1, CCDC96, TADA2B, TBC1D14
8	8670001	8700000	30000	0.0134948	0.0277867	Meishan
8	8800001	8830000	30000	0.000627	0.00264348	Hampshire
8	9990001	10010000	20000	0.00964971	0.0065568	Tibetan wild boar	ENSSSCG00000008736	CPEB2
8	11230001	11260000	30000	0.0177774	0.0342079	Jinhua
8	20760001	20790000	30000	0.0005456	0.00238053	Piétrain
8	22870001	22910000	40000	0.0001407	0.000810817	Rongchang
8	28450001	28500000	50000	0.0001809	0.000986935	Jinhua
8	32620001	32650000	30000	0.000627	0.00264348	Hampshire	ENSSSCG00000025039	UBE2K
8	38180001	38220000	40000	0.0003656	0.00173439	Jinhua	ENSSSCG00000028922	GABRA2
8	39610001	39660000	50000	2.4e-06	2.4e-05	Piétrain	ENSSSCG00000008813	CORIN
8	41070001	41100000	30000	5.51e-05	0.00036076	Berkshire	ENSSSCG00000008830	CWH43
8	42670001	42700000	30000	0.0002307	0.0011807	Large White
8	44990001	45020000	30000	0.008435	0.0199493	Rongchang	ENSSSCG00000025411
8	49160001	49260000	100000	0	0	Jinhua	ENSSSCG00000008873	FAM198B
8	50740001	50830000	90000	0	0	Tibetan wild boar
8	55220001	55360000	140000	0	0	Rongchang	ENSSSCG00000008888, ENSSSCG00000008889	NPY1R, NPY5R
8	55380001	55430000	50000	7.4e-05	0.000470365	Rongchang
8	56900001	56930000	30000	0.0134948	0.0277867	Meishan
8	56960001	56990000	30000	0.0134948	0.0277867	Meishan
8	65710001	65740000	30000	0.0134948	0.0277867	Meishan
8	65800001	65950000	150000	0	0	Meishan
8	66600001	66740000	140000	0	0	Meishan
8	70120001	70150000	30000	0.008435	0.0199493	Rongchang	ENSSSCG00000008929
8	73630001	73660000	30000	0.001216	0.0043047	Landrace	ENSSSCG00000008948	ALB
8	93280001	93320000	40000	1.09e-05	8.74e-05	Landrace	ENSSSCG00000009061	NAA15
8	99470001	99500000	30000	0.001216	0.0043047	Landrace
8	102320001	102350000	30000	0.00018	0.000983198	Bamei
8	103000001	103030000	30000	0.0134948	0.0277867	Meishan	ENSSSCG00000009071	JADE1
8	104380001	104420000	40000	0.0003656	0.00173439	Jinhua
8	108320001	108350000	30000	0.0134948	0.0277867	Meishan	ENSSSCG00000009084	SPATA5
8	115640001	115670000	30000	0.00018	0.000983198	Bamei
8	116350001	116380000	30000	0.0177774	0.0342079	Jinhua
8	132370001	132410000	40000	0.0001407	0.000810817	Rongchang
8	138350001	138380000	30000	0.0134948	0.0277867	Meishan
8	141930001	141960000	30000	0.000627	0.00264348	Hampshire
8	143360001	143390000	30000	0.008435	0.0199493	Rongchang	ENSSSCG00000009230	WDFY3
9	5180001	5210000	30000	0.0062168	0.021033	Jinhua	ENSSSCG00000024353, ENSSSCG00000027566, ENSSSCG00000014693
9	9370001	9410000	40000	8e-07	2.75e-05	Large White	ENSSSCG00000020856	PPME1
9	11820001	11870000	50000	7e-07	2.49e-05	Large White	ENSSSCG00000014868	C11orf30
9	13070001	13110000	40000	0.0003582	0.0024288	Tibetan wild boar	ENSSSCG00000014878	PAK1
9	16950001	16980000	30000	0.0061087	0.0207413	Meishan
9	28090001	28120000	30000	0.0003769	0.00250844	Berkshire
9	34110001	34140000	30000	0.0175227	0.0495814	Tibetan wild boar
9	40480001	40520000	40000	9.15e-05	0.000915323	Meishan	ENSSSCG00000021212, ENSSSCG00000029198	CUL5, RAB39A
9	55070001	55100000	30000	0.0175227	0.0495814	Tibetan wild boar	ENSSSCG00000015136	UBASH3B
9	55950001	56000000	50000	0.0001836	0.00150991	Tibetan wild boar	ENSSSCG00000015148, ENSSSCG00000015149, ENSSSCG00000015150	OR8D4
9	56150001	56180000	30000	0.0016395	0.00697866	Bamei	ENSSSCG00000025424, ENSSSCG00000029379
9	88160001	88220000	60000	2.8e-06	6.61e-05	Rongchang
9	104420001	104460000	40000	8.47e-05	0.000867197	Jinhua
9	109490001	109530000	40000	0.0003863	0.00254738	Rongchang
9	116160001	116220000	60000	3.5e-06	7.44e-05	Tibetan wild boar	ENSSSCG00000015430, ENSSSCG00000029078	EFCAB10, RINT1
9	131460001	131510000	50000	0.0001836	0.00150991	Tibetan wild boar	ENSSSCG00000025934
9	134610001	134640000	30000	0.0061087	0.0207413	Meishan	ENSSSCG00000015539, ENSSSCG00000015540	MR1, STX6
9	138450001	138470000	20000	0.0101186	0.0320681	Hampshire	ENSSSCG00000015567	FAM129A
9	141480001	141510000	30000	0.0062168	0.021033	Jinhua
9	149330001	149360000	30000	0.000233	0.00180732	Large White
9	149630001	149660000	30000	0.000233	0.00180732	Large White	ENSSSCG00000015627	ZPBP
9	151910001	151960000	50000	4.58e-05	0.000542248	Meishan
9	152160001	152200000	40000	9.15e-05	0.000915323	Meishan
9	152520001	152580000	60000	7e-07	2.49e-05	Meishan
9	152780001	152820000	40000	9.15e-05	0.000915323	Meishan
10	20001	50000	30000	9.53e-05	0.000603759	Hampshire	ENSSSCG00000010793, ENSSSCG00000010794, ENSSSCG00000010795	NDUFAB1, PALB2, DCTN5
10	4320001	4350000	30000	0.006735	0.0188965	Piétrain
10	22220001	22300000	80000	0	0	Piétrain	ENSSSCG00000030286	LCMT1
10	22870001	22900000	30000	0.0010306	0.00404578	Large White
10	23070001	23100000	30000	0.006735	0.0188965	Piétrain
10	23130001	23160000	30000	0.006735	0.0188965	Piétrain
10	23180001	23240000	60000	9e-07	1.2e-05	Piétrain
10	23310001	23360000	50000	5.85e-05	0.00039116	Piétrain
10	23920001	23980000	60000	9e-07	1.2e-05	Piétrain	ENSSSCG00000010892	KCNT2
10	25280001	25310000	30000	9.48e-05	0.000601021	Berkshire
10	28630001	28660000	30000	0.0041722	0.012979	Jinhua	ENSSSCG00000010914, ENSSSCG00000010922	NAV1, ELF3
10	29920001	29950000	30000	0.0008206	0.00336296	Rongchang	ENSSSCG00000010935, ENSSSCG00000010937	SLC35D2, HSD17B3
10	35240001	35310000	70000	0	0	Jinhua	ENSSSCG00000026087	GKAP1
10	42740001	42790000	50000	3.8e-06	3.84e-05	Rongchang
10	51880001	51930000	50000	3.8e-06	3.84e-05	Rongchang	ENSSSCG00000011055	MRPL51
10	54110001	54140000	30000	0.0006337	0.00278615	Bamei	ENSSSCG00000011068
10	58100001	58130000	30000	0.006735	0.0188965	Piétrain
10	69410001	69440000	30000	0.0016592	0.00578454	Landrace
11	1050001	1120000	70000	0	0	Jinhua
11	1180001	1210000	30000	0.0016171	0.00771425	Jinhua
11	6780001	6840000	60000	0	0	Hampshire	ENSSSCG00000009326	KATNAL1
11	7000001	7030000	30000	0.001022	0.00553713	Meishan	ENSSSCG00000009328
11	7780001	7830000	50000	9e-07	2.18e-05	Hampshire	ENSSSCG00000009335	B3GALTL
11	14870001	14900000	30000	0.000318	0.00253083	Hampshire	ENSSSCG00000009369	COG6
11	15830001	15860000	30000	0.0032143	0.0126961	Tibetan wild boar	ENSSSCG00000009373, ENSSSCG00000009374	TPTE2, SLC25A2, SLC25A15, TPTE
11	17220001	17250000	30000	0.001022	0.00553713	Meishan
11	25600001	25630000	30000	1.52e-05	0.000227738	Large White
11	34770001	34820000	50000	0.0001951	0.00181977	Bamei
11	40180001	40230000	50000	0.0020771	0.0090809	Rongchang
11	41720001	41750000	30000	0.0157929	0.0422972	Bamei
11	41830001	41860000	30000	0.0007058	0.00412121	Landrace
11	54510001	54570000	60000	2e-07	6.02e-06	Tibetan wild boar
11	60530001	60580000	50000	0.0020771	0.0090809	Rongchang
11	60620001	60680000	60000	2e-07	6.02e-06	Tibetan wild boar
11	60710001	60760000	50000	2.17e-05	0.000304098	Tibetan wild boar
11	61110001	61160000	50000	0.0020771	0.0090809	Rongchang
11	62430001	62460000	30000	0.0007058	0.00412121	Landrace
11	65440001	65460000	20000	0.0048219	0.0172101	Berkshire
11	67590001	67620000	30000	0.0007058	0.00412121	Landrace
11	69640001	69670000	30000	0.0016171	0.00771425	Jinhua	ENSSSCG00000009490	DCT
11	70680001	70720000	40000	0.0040466	0.0151471	Rongchang	ENSSSCG00000009498	ABCC4
11	71080001	71140000	60000	8.86e-05	0.00103868	Rongchang	ENSSSCG00000026286, ENSSSCG00000022549	ABCC4
11	83300001	83330000	30000	0.0007058	0.00412121	Landrace
12	12990001	13020000	30000	1.85e-05	0.000197873	Hampshire
12	15580001	15630000	50000	1.71e-05	0.000187946	Piétrain	ENSSSCG00000017298	TANC2
12	18720001	18750000	30000	0.0021119	0.00759626	Rongchang	ENSSSCG00000017345, ENSSSCG00000017346	FAM187A, EFTUD2, CCDC103
12	18780001	18810000	30000	0.0021119	0.00759626	Rongchang	ENSSSCG00000021306, ENSSSCG00000017349	ADAM11, GJC1
12	20410001	20440000	30000	0.0019523	0.00718737	Jinhua	ENSSSCG00000017394, ENSSSCG00000017395	TUBG2, FAM134C
12	23250001	23300000	50000	0.0005009	0.00256739	Tibetan wild boar	ENSSSCG00000017504, ENSSSCG00000017505	CDK12, MED1
12	29640001	29700000	60000	0	0	Landrace
12	31500001	31520000	20000	0.0206173	0.0404264	Large White
12	32560001	32580000	20000	0.0088106	0.0207791	Berkshire
12	40530001	40560000	30000	0.0027355	0.00902861	Bamei	ENSSSCG00000017697, ENSSSCG00000025775, ENSSSCG00000029874	TADA2A, DUSP14
12	45250001	45280000	30000	0.0027355	0.00902861	Bamei	ENSSSCG00000017747	RAB11FIP4
12	47480001	47510000	30000	3.28e-05	0.000287934	Large White
12	51350001	51380000	30000	3.28e-05	0.000287934	Large White	ENSSSCG00000017851, ENSSSCG00000020911, ENSSSCG00000017849	OR3A1
12	60380001	60410000	30000	0.0001229	0.000844665	Landrace
13	1410001	1480000	70000	0	0	Rongchang	ENSSSCG00000029094	PIK3R4
13	8800001	8840000	40000	1.07e-05	9.22e-05	Berkshire
13	16610001	16680000	70000	0	0	Jinhua
13	19630001	19660000	30000	0.0054386	0.0149265	Rongchang
13	29270001	29310000	40000	8.25e-05	0.000491315	Tibetan wild boar
13	32160001	32190000	30000	0.0061888	0.0164426	Tibetan wild boar	ENSSSCG00000011317, ENSSSCG00000011318	CXCR6, FYCO1
13	32580001	32610000	30000	0.0061888	0.0164426	Tibetan wild boar	ENSSSCG00000029879	LTF
13	38910001	38980000	70000	0	0	Tibetan wild boar	ENSSSCG00000023290, ENSSSCG00000023387, ENSSSCG00000028799, ENSSSCG00000024925, ENSSSCG00000011455, ENSSSCG00000011456	CHDH
13	45150001	45180000	30000	0.0054386	0.0149265	Rongchang
13	46860001	46890000	30000	0.0001733	0.00089692	Piétrain
13	51660001	51690000	30000	0.0027694	0.00894596	Hampshire	ENSSSCG00000011497	MAGI1
13	55400001	55430000	30000	0.0027694	0.00894596	Hampshire
13	60550001	60580000	30000	0.0035058	0.0106015	Landrace
13	60690001	60730000	40000	4.01e-05	0.000267198	Landrace
13	62810001	62860000	50000	1.19e-05	9.99e-05	Meishan	ENSSSCG00000011524	CHL1
13	62990001	63050000	60000	0	0	Piétrain	ENSSSCG00000011524	CHL1
13	63800001	63910000	110000	0	0	Piétrain	ENSSSCG00000022873
13	64970001	65000000	30000	0.0035058	0.0106015	Landrace
13	86350001	86420000	70000	0	0	Landrace	ENSSSCG00000011657	CLDN18
13	88470001	88500000	30000	0.0035058	0.0106015	Landrace
13	89510001	89560000	50000	2e-05	0.000151031	Landrace
13	90980001	91010000	30000	0.0035058	0.0106015	Landrace	ENSSSCG00000011678, ENSSSCG00000011679	ATR, XRN1
13	91030001	91060000	30000	0.0035058	0.0106015	Landrace	ENSSSCG00000011679	ATR
13	95280001	95330000	50000	2e-05	0.000151031	Landrace
13	100420001	100450000	30000	0.0035058	0.0106015	Landrace
13	103770001	103810000	40000	4.01e-05	0.000267198	Landrace	ENSSSCG00000028855	GMPS
13	104510001	104540000	30000	0.0035058	0.0106015	Landrace
13	109320001	109350000	30000	0.0027694	0.00894596	Hampshire	ENSSSCG00000022952	NMD3
13	109600001	109630000	30000	0.0027694	0.00894596	Hampshire
13	110220001	110270000	50000	1.23e-05	0.000102396	Hampshire
13	111220001	111260000	40000	2.67e-05	0.000189962	Hampshire
13	111280001	111340000	60000	7e-07	8.24e-06	Jinhua
13	113840001	113870000	30000	0.0013777	0.00510933	Berkshire
13	113980001	114090000	110000	0	0	Berkshire
13	116620001	116650000	30000	0.0027694	0.00894596	Hampshire	ENSSSCG00000011743	MECOM
13	119140001	119190000	50000	0.0003456	0.00152862	Bamei	ENSSSCG00000011750	PLD1
13	131340001	131370000	30000	0.0061888	0.0164426	Tibetan wild boar	ENSSSCG00000011782, ENSSSCG00000011783	ABCC5, EIF2B5
13	149750001	149790000	40000	1.07e-05	9.22e-05	Berkshire
13	153160001	153200000	40000	0.0006776	0.00273988	Bamei
13	158390001	158430000	40000	0.0006776	0.00273988	Bamei
13	161780001	161810000	30000	0.0056243	0.015311	Jinhua
13	163550001	163580000	30000	0.0056243	0.015311	Jinhua
13	166360001	166390000	30000	0.0056243	0.015311	Jinhua
13	166440001	166480000	40000	2.38e-05	0.000171849	Meishan
13	167180001	167210000	30000	0.0024303	0.00810519	Meishan
13	169800001	169840000	40000	0.0006776	0.00273988	Bamei
13	170610001	170660000	50000	1.23e-05	0.000102396	Hampshire	ENSSSCG00000026824	OR5K3
13	174940001	174980000	40000	2.38e-05	0.000171849	Meishan
13	175510001	175550000	40000	2.38e-05	0.000171849	Meishan
13	177900001	177940000	40000	0.0006776	0.00273988	Bamei
13	181260001	181370000	110000	0	0	Bamei
13	182630001	182670000	40000	8.25e-05	0.000491315	Tibetan wild boar
13	184520001	184570000	50000	4.12e-05	0.000273106	Tibetan wild boar
13	194680001	194700000	20000	0.0155307	0.0344167	Large White
13	194940001	194970000	30000	0.0013777	0.00510933	Berkshire
13	196310001	196340000	30000	0.0013777	0.00510933	Berkshire
13	211130001	211160000	30000	0.0024303	0.00810519	Meishan	ENSSSCG00000030480	DYRK1A
13	215540001	215570000	30000	0.0024303	0.00810519	Meishan	ENSSSCG00000012084, ENSSSCG00000025821	C2CD2, PRDM15
13	216260001	216290000	30000	0.0024303	0.00810519	Meishan
13	216890001	216920000	30000	0.0054386	0.0149265	Rongchang	ENSSSCG00000029627, ENSSSCG00000025525	PWP2, CH507-9B2.4, CH507-9B2.5, CH507-9B2.3, C21orf33
14	4010001	4050000	40000	1.17e-05	0.000129433	Piétrain	ENSSSCG00000009594, ENSSSCG00000009595	SPTLC1
14	11560001	11610000	50000	5.8e-06	7.32e-05	Piétrain	ENSSSCG00000009659, ENSSSCG00000030130	PNMA2, DPYSL2
14	13760001	13790000	30000	0.0021475	0.00729462	Jinhua	ENSSSCG00000009681	INTS9
14	22800001	22830000	30000	0.0015018	0.00568119	Large White
14	23240001	23290000	50000	4.26e-05	0.000358636	Rongchang	ENSSSCG00000009722	SPOCK3
14	26190001	26220000	30000	0.0015018	0.00568119	Large White	ENSSSCG00000009749	PIWIL1
14	31030001	31070000	40000	7.07e-05	0.000545049	Berkshire	ENSSSCG00000009768, ENSSSCG00000009769, ENSSSCG00000009770, ENSSSCG00000009771	TCTN2, GTF2H3, DDX55, EIF2B1
14	36730001	36760000	30000	0.005285	0.0148842	Berkshire	ENSSSCG00000009852	VSIG10
14	46660001	46690000	30000	0.0017873	0.00638357	Meishan
14	50070001	50110000	40000	1.63e-05	0.000168598	Meishan
14	57260001	57290000	30000	0.0057599	0.0158283	Rongchang
14	62030001	62070000	40000	1.23e-05	0.000134387	Hampshire
14	67090001	67130000	40000	1.17e-05	0.000129433	Piétrain
14	67520001	67550000	30000	0.001447	0.00553676	Piétrain	ENSSSCG00000010209	FAM13C
14	68630001	68660000	30000	0.001447	0.00553676	Piétrain	ENSSSCG00000010212	ANK3
14	70140001	70200000	60000	7e-07	1.41e-05	Berkshire	ENSSSCG00000010218	C10orf107
14	70220001	70250000	30000	0.005285	0.0148842	Berkshire
14	99170001	99200000	30000	0.0015018	0.00568119	Large White	ENSSSCG00000029238
14	105170001	105270000	100000	0	0	Tibetan wild boar
14	111370001	111400000	30000	0.0021475	0.00729462	Jinhua
14	116090001	116120000	30000	0.001447	0.00553676	Piétrain	ENSSSCG00000010487	CYP2C9, CYP2C8, CYP2C19, CYP2C18, RP11-400G3.5
14	128250001	128280000	30000	0.005285	0.0148842	Berkshire	ENSSSCG00000030026	SORCS1
14	129890001	129940000	50000	4.26e-05	0.000358636	Rongchang
14	131360001	131390000	30000	0.005285	0.0148842	Berkshire	ENSSSCG00000010621	ADD3
14	131830001	131860000	30000	0.005285	0.0148842	Berkshire	ENSSSCG00000010625	SMC3
14	136100001	136130000	30000	0.0013159	0.00517739	Hampshire	ENSSSCG00000010651	ABLIM1
14	139810001	139860000	50000	1.18e-05	0.000130267	Jinhua
14	144690001	144720000	30000	0.001447	0.00553676	Piétrain
15	10520001	10550000	30000	0.000183	0.00104824	Piétrain
15	11180001	11210000	30000	0.00067	0.00295828	Hampshire
15	16090001	16140000	50000	0.0001048	0.000671417	Jinhua	ENSSSCG00000024023	HNMT
15	17310001	17350000	40000	4.4e-06	4.81e-05	Hampshire
15	17370001	17400000	30000	0.00067	0.00295828	Hampshire
15	21290001	21330000	40000	0.0002122	0.00118989	Jinhua
15	28240001	28280000	40000	1.44e-05	0.000121446	Rongchang
15	32100001	32160000	60000	0	0	Berkshire
15	42760001	42830000	70000	0	0	Jinhua	ENSSSCG00000015753	ANGPT2
15	44050001	44080000	30000	0.0121949	0.0286391	Jinhua
15	57710001	57750000	40000	0.0006844	0.00300179	Tibetan wild boar
15	59390001	59440000	50000	0.0003456	0.00179658	Tibetan wild boar
15	59480001	59530000	50000	0.0005959	0.00272487	Meishan	ENSSSCG00000015835, ENSSSCG00000015834	RNF122, DUSP26
15	70690001	70740000	50000	4e-07	5.78e-06	Piétrain
15	80890001	80920000	30000	0.0017011	0.00578724	Rongchang	ENSSSCG00000015908	TTC21B
15	82350001	82390000	40000	1.44e-05	0.000121446	Rongchang
15	82590001	82620000	30000	0.0017011	0.00578724	Rongchang	ENSSSCG00000015917
15	83420001	83480000	60000	8.1e-06	7.83e-05	Tibetan wild boar	ENSSSCG00000023421
15	84390001	84440000	50000	8.4e-06	8.07e-05	Rongchang	ENSSSCG00000015923	NOSTRIN
15	96990001	97030000	40000	0.0006844	0.00300179	Tibetan wild boar	ENSSSCG00000023924	PDE1A
15	103110001	103150000	40000	0.0006844	0.00300179	Tibetan wild boar
15	104080001	104150000	70000	4e-07	5.78e-06	Tibetan wild boar	ENSSSCG00000016034, ENSSSCG00000016035	COL5A2, COL3A1
15	110120001	110200000	80000	2e-07	3.5e-06	Tibetan wild boar
15	111530001	111550000	20000	0.0083369	0.0208184	Landrace	ENSSSCG00000029793	CCDC150
15	112470001	112530000	60000	0	0	Rongchang	ENSSSCG00000016075, ENSSSCG00000016076, ENSSSCG00000016077	COQ10B, SF3B1, HSPD1
15	114030001	114060000	30000	0.0010563	0.00403583	Bamei	ENSSSCG00000021657	SATB2
15	115430001	115470000	40000	0.001178	0.00433044	Meishan	ENSSSCG00000029606, ENSSSCG00000024477	AOX1, DKFZP313A047
15	126790001	126820000	30000	0.0017011	0.00578724	Rongchang
15	137250001	137280000	30000	0.00067	0.00295828	Hampshire
15	142600001	142630000	30000	0.0001283	0.000787907	Berkshire	ENSSSCG00000016246, ENSSSCG00000016247	TM4SF20, MFF
16	9900001	9920000	20000	0.0177973	0.0469429	Large White
16	10100001	10140000	40000	1e-07	3.04e-06	Large White
16	10190001	10220000	30000	0.0005464	0.0038026	Berkshire
16	12760001	12790000	30000	0.0012079	0.00637407	Landrace
16	18700001	18730000	30000	0.0034497	0.0139905	Jinhua
16	71480001	71520000	40000	1.2e-06	2.67e-05	Piétrain	ENSSSCG00000017051	SOX30
16	82820001	82860000	40000	4.82e-05	0.000541958	Jinhua
16	85040001	85070000	30000	0.0034497	0.0139905	Jinhua
17	25190001	25220000	30000	0.0008079	0.00360556	Piétrain	ENSSSCG00000007076, ENSSSCG00000007078	NDUFAF5, SEL1L2
17	25450001	25510000	60000	0	0	Piétrain
17	28220001	28250000	30000	0.0097657	0.0220551	Tibetan wild boar	ENSSSCG00000007080	KIF16B
17	30330001	30360000	30000	0.0097657	0.0220551	Tibetan wild boar	ENSSSCG00000007098	DTD1
17	30650001	30690000	40000	9.1e-06	9.67e-05	Berkshire
17	39120001	39150000	30000	0.0097657	0.0220551	Tibetan wild boar	ENSSSCG00000007199	SLC52A3
17	41710001	41740000	30000	3.8e-06	4.72e-05	Large White	ENSSSCG00000007260, ENSSSCG00000007261	BPIFB1, BPIFA1
17	45430001	45460000	30000	0.0002462	0.00136857	Bamei	ENSSSCG00000007322, ENSSSCG00000007323	NDRG3, DSN1
17	58900001	58930000	30000	0.0001661	0.00103424	Landrace
17	63060001	63100000	40000	7.41e-05	0.000547087	Jinhua
17	64900001	64930000	30000	0.0019983	0.00686139	Rongchang	ENSSSCG00000007502, ENSSSCG00000007503	SPO11, RAE1
18	4420001	4440000	20000	0.0117415	0.0265481	Hampshire
18	6110001	6150000	40000	0.0001584	0.000924586	Jinhua	ENSSSCG00000016432	PRKAG2
18	8500001	8530000	30000	9.41e-05	0.000684777	Piétrain	ENSSSCG00000016491	KIAA1147
18	15490001	15530000	40000	0.0001211	0.000798533	Rongchang
18	15560001	15590000	30000	0.0060541	0.0164643	Rongchang
18	20330001	20370000	40000	0.0001584	0.000924586	Jinhua	ENSSSCG00000016567, ENSSSCG00000016568	STRIP2, AHCYL2
18	23590001	23620000	30000	0.0031285	0.0102636	Tibetan wild boar
18	32180001	32200000	20000	0.0147415	0.0314992	Berkshire
18	43120001	43150000	30000	6.6e-06	9.27e-05	Large White
18	45770001	45820000	50000	6.33e-05	0.000522374	Rongchang	ENSSSCG00000016670	PPP1R17
18	54350001	54380000	30000	0.0060541	0.0164643	Rongchang
18	56340001	56360000	20000	0.0147415	0.0314992	Berkshire	ENSSSCG00000016759
X	7700001	7730000	30000	8.73e-05	0.000279024	Large White	ENSSSCG00000012110	MID1
X	24900001	24930000	30000	0.0023114	0.0044803	Piétrain
X	28390001	28520000	130000	0	0	Piétrain	ENSSSCG00000012199	NR0B1
X	31820001	31930000	110000	0	0	Piétrain	ENSSSCG00000028148	UTRN
X	42080001	42110000	30000	5.32e-05	0.000176995	Hampshire
X	45650001	45690000	40000	1.2e-06	5.12e-06	Bamei
X	63820001	63860000	40000	1.28e-05	4.56e-05	Jinhua	ENSSSCG00000030850	TEX11
X	64020001	64050000	30000	0.0014458	0.0030029	Jinhua
X	64130001	64230000	100000	0	0	Jinhua
X	64320001	64360000	40000	1.28e-05	4.56e-05	Jinhua
X	106820001	106840000	20000	0.0345681	0.043363	Hampshire	ENSSSCG00000012590	LHFPL1
X	108290001	108320000	30000	0.0001923	0.00054824	Bamei
X	122830001	122870000	40000	4e-07	1.84e-06	Large White	ENSSSCG00000012663	ENOX2
X	126240001	126260000	20000	0.0345681	0.043363	Hampshire	ENSSSCG00000031011	CCDC160
X	140400001	140420000	20000	0.0345681	0.043363	Hampshire
X	143760001	143780000	20000	0.0345681	0.043363	Hampshire
