# Supplementary material for: Comprehensive variation discovery and recovery of missing sequence in the pig genome using multiple de novo assemblies
Source: HighWire-hosted journal article supplement (doi:10.1101/gr.207456.116), 2016-09-19
Supplement: Supplemental_Table_S16.xlsx [file Supplemental_Table_S16.xlsx]

## Sheet: Supplemental Table S16
Supplemental Table S16. List of missing sequences filled in existing large gaps (≥ 50 kb) in reference assembly.
Gaps				Missing sequences				Number of archored OEA reads
Gap ID	Chromosome	Start	End	Assemblies	Scaffold ID	Start	End	2 kb insert size library	5 kb insert size library	5 kb insert size library	10 kb insert size library	Total number
4	1	876244	926243	Berkshire	scaffold14947.1	434281	434910	37	11	7	\	55
4	1	876244	926243	Bamei	scaffold14129	434776	435390	12	11	13	\	36
4	1	876244	926243	Hampshire	scaffold28337.1	115191	115797	24	6	7	\	37
4	1	876244	926243	Jinhua	scaffold33963.1	435618	436236	19	12	11	\	42
4	1	876244	926243	Landrace	scaffold3931	433854	434459	18	3	6	\	27
4	1	876244	926243	Large White	scaffold36207.1	437923	438495	10	4	11	6	31
4	1	876244	926243	Large White	scaffold36207.2	188	754	7	5	7	1	20
4	1	876244	926243	Meishan	scaffold33745	435558	436173	18	14	24	\	56
4	1	876244	926243	Piétrain	scaffold36247	3631798	3632394	17	11	8	\	36
4	1	876244	926243	Rongchang	scaffold6249.3	2228451	2229869	0	0	0	8	8
4	1	876244	926243	Rongchang	scaffold6249.3	2335988	2336613	24	9	5	1	39
4	1	876244	926243	Tibetan wild boar	scaffold602	451364	451949	22	0	\	6	28
5	1	1241693	1291692	Large White	scaffold36207.2	107065	107817	0	0	0	5	5
5	1	1241693	1291692	Rongchang	scaffold6249.3	2230288	2231022	0	0	0	8	8
5	1	1241693	1291692	Tibetan wild boar	scaffold602	559960	561377	0	0	\	9	9
11	1	3127674	3177673	Berkshire	scaffold14947.1	2026293	2029433	0	22	48	\	70
11	1	3127674	3177673	Berkshire	scaffold14947.1	2029604	2030444	0	10	14	\	24
11	1	3127674	3177673	Berkshire	scaffold14947.1	2030618	2033302	96	51	73	\	220
11	1	3127674	3177673	Bamei	scaffold14129	2033104	2036264	0	11	30	\	41
11	1	3127674	3177673	Bamei	scaffold14129	2036419	2037264	0	17	17	\	34
11	1	3127674	3177673	Bamei	scaffold14129	2037445	2040109	53	47	53	\	153
11	1	3127674	3177673	Hampshire	scaffold28337.1	1711445	1712472	0	0	4	\	4
11	1	3127674	3177673	Hampshire	scaffold28337.1	1712487	1715465	0	21	64	\	85
11	1	3127674	3177673	Hampshire	scaffold28337.1	1715630	1716458	0	12	12	\	24
11	1	3127674	3177673	Hampshire	scaffold28337.1	1716646	1717341	2	15	9	\	26
11	1	3127674	3177673	Hampshire	scaffold28337.1	1717351	1719315	58	65	53	\	176
11	1	3127674	3177673	Jinhua	scaffold33963.1	2028123	2031271	0	11	27	\	38
11	1	3127674	3177673	Jinhua	scaffold33963.1	2031441	2032284	0	13	4	\	17
11	1	3127674	3177673	Jinhua	scaffold33963.1	2032469	2033141	1	9	13	\	23
11	1	3127674	3177673	Jinhua	scaffold33963.1	2033143	2035154	62	58	46	\	166
11	1	3127674	3177673	Landrace	scaffold3521	238194	241340	0	7	23	\	30
11	1	3127674	3177673	Landrace	scaffold3521	241507	242347	0	12	7	\	19
11	1	3127674	3177673	Landrace	scaffold3521	242526	243206	0	8	12	\	20
11	1	3127674	3177673	Landrace	scaffold3521	243230	245188	77	42	25	\	144
11	1	3127674	3177673	Large White	scaffold36207.2	1590810	1591974	0	0	0	5	5
11	1	3127674	3177673	Large White	scaffold36207.2	1595076	1598036	0	11	27	9	47
11	1	3127674	3177673	Large White	scaffold36207.2	1598185	1599044	0	9	13	1	23
11	1	3127674	3177673	Large White	scaffold36207.2	1599220	1599901	1	5	10	1	17
11	1	3127674	3177673	Large White	scaffold36207.2	1599928	1601777	57	41	34	12	144
11	1	3127674	3177673	Meishan	scaffold47115	1369020	1371702	64	63	73	\	200
11	1	3127674	3177673	Meishan	scaffold47115	1371873	1372722	0	17	13	\	30
11	1	3127674	3177673	Meishan	scaffold47115	1372895	1375860	0	8	23	\	31
11	1	3127674	3177673	Piétrain	scaffold36247	2029887	2032555	63	71	69	\	203
11	1	3127674	3177673	Piétrain	scaffold36247	2032747	2033590	0	15	12	\	27
11	1	3127674	3177673	Piétrain	scaffold36247	2033746	2036715	0	20	47	\	67
11	1	3127674	3177673	Rongchang	scaffold6249.3	731638	733616	67	25	20	2	114
11	1	3127674	3177673	Rongchang	scaffold6249.3	733618	734315	0	7	7	0	14
11	1	3127674	3177673	Rongchang	scaffold6249.3	734504	735339	0	11	5	1	17
11	1	3127674	3177673	Rongchang	scaffold6249.3	735502	738650	0	8	27	6	41
11	1	3127674	3177673	Tibetan wild boar	scaffold14431.1	945557	948227	56	41	\	8	105
11	1	3127674	3177673	Tibetan wild boar	scaffold14431.1	948405	949253	0	7	\	2	9
11	1	3127674	3177673	Tibetan wild boar	scaffold14431.1	950862	953417	0	0	\	4	4
14	1	4564727	4614726	Berkshire	scaffold14947.1	3119376	3119942	3	1	1	\	5
14	1	4564727	4614726	Bamei	scaffold45977.1	697781	698351	2	3	1	\	6
14	1	4564727	4614726	Hampshire	scaffold28337.1	2804709	2805277	3	1	0	\	4
14	1	4564727	4614726	Meishan	scaffold47115	281697	282261	0	5	2	\	7
15	1	5136692	5186691	Berkshire	scaffold14947.1	3747896	3748479	0	0	6	\	6
15	1	5136692	5186691	Berkshire	scaffold14947.1	3750284	3752373	0	30	60	\	90
15	1	5136692	5186691	Berkshire	scaffold14947.1	3752523	3753693	0	29	33	\	62
15	1	5136692	5186691	Berkshire	scaffold15261	232908	233620	0	2	4	\	6
15	1	5136692	5186691	Bamei	scaffold45977.1	1327050	1327621	0	1	3	\	4
15	1	5136692	5186691	Bamei	scaffold45977.1	1329437	1331559	0	41	49	\	90
15	1	5136692	5186691	Bamei	scaffold45977.1	1331721	1332840	0	32	25	\	57
15	1	5136692	5186691	Bamei	scaffold7533	231404	232088	0	0	6	\	6
15	1	5136692	5186691	Hampshire	scaffold12521	232553	233265	0	6	5	\	11
15	1	5136692	5186691	Hampshire	scaffold28337.2	266299	266869	0	0	9	\	9
15	1	5136692	5186691	Hampshire	scaffold28337.2	268688	270804	0	49	40	\	89
15	1	5136692	5186691	Hampshire	scaffold28337.2	270827	271973	0	33	34	\	67
15	1	5136692	5186691	Jinhua	scaffold33963.2	1381054	1381634	0	0	5	\	5
15	1	5136692	5186691	Jinhua	scaffold33963.2	1383442	1385603	0	44	36	\	80
15	1	5136692	5186691	Jinhua	scaffold553371	1	975	0	27	28	\	55
15	1	5136692	5186691	Jinhua	scaffold6623.1	231533	232236	0	1	14	\	15
15	1	5136692	5186691	Landrace	scaffold30337.1	699673	700371	0	2	3	\	5
15	1	5136692	5186691	Landrace	scaffold3521	1962273	1962851	0	0	10	\	10
15	1	5136692	5186691	Landrace	scaffold3521	1964673	1968069	0	80	58	\	138
15	1	5136692	5186691	Large White	scaffold33251.1	601885	602585	0	0	9	0	9
15	1	5136692	5186691	Large White	scaffold36207.2	3325720	3326289	0	0	17	3	20
15	1	5136692	5186691	Large White	scaffold36207.2	3328100	3330280	0	39	75	8	122
15	1	5136692	5186691	Large White	scaffold36207.2	3330302	3331505	0	21	23	6	50
15	1	5136692	5186691	Meishan	scaffold1833.3	28493	29197	0	1	6	\	7
15	1	5136692	5186691	Meishan	scaffold629	5153060	5154147	0	23	36	\	59
15	1	5136692	5186691	Meishan	scaffold629	5154525	5156639	0	41	40	\	81
15	1	5136692	5186691	Meishan	scaffold629	5158451	5159028	0	0	6	\	6
15	1	5136692	5186691	Piétrain	scaffold12995	232259	232969	0	7	9	\	16
15	1	5136692	5186691	Piétrain	scaffold36247	300071	301230	0	32	18	\	50
15	1	5136692	5186691	Piétrain	scaffold36247	301301	303458	0	57	38	\	95
15	1	5136692	5186691	Piétrain	scaffold36247	305292	305843	0	0	7	\	7
15	1	5136692	5186691	Rongchang	scaffold6249.1	2329104	2330218	0	15	22	1	38
15	1	5136692	5186691	Rongchang	scaffold6249.1	2330347	2332496	0	32	31	0	63
15	1	5136692	5186691	Rongchang	scaffold6249.1	2334310	2334894	0	0	5	0	5
15	1	5136692	5186691	Rongchang	scaffold6895	601593	602288	0	2	5	0	7
15	1	5136692	5186691	Tibetan wild boar	scaffold8767	771595	772173	0	0	\	5	5
15	1	5136692	5186691	Tibetan wild boar	scaffold8767	773975	777390	0	26	\	3	29
16	1	5545776	5595775	Berkshire	scaffold14947.1	4143290	4148212	0	23	76	\	99
16	1	5545776	5595775	Berkshire	scaffold14947.1	4148628	4149738	0	26	36	\	62
16	1	5545776	5595775	Berkshire	scaffold14947.1	4149757	4151631	61	37	24	\	122
16	1	5545776	5595775	Berkshire	scaffold14947.1	4156857	4158729	0	45	28	\	73
16	1	5545776	5595775	Bamei	scaffold45977.1	1725039	1729961	0	23	55	\	78
16	1	5545776	5595775	Bamei	scaffold45977.1	1730170	1733356	58	61	66	\	185
16	1	5545776	5595775	Bamei	scaffold45977.1	1738615	1740490	0	48	41	\	89
16	1	5545776	5595775	Hampshire	scaffold28337.4	10158	15086	0	44	46	\	90
16	1	5545776	5595775	Hampshire	scaffold28337.4	15285	18488	65	85	45	\	195
16	1	5545776	5595775	Hampshire	scaffold28337.4	23722	25613	1	62	33	\	96
16	1	5545776	5595775	Jinhua	scaffold3549.3	353933	355851	0	56	37	\	93
16	1	5545776	5595775	Jinhua	scaffold3549.3	361062	362923	76	55	21	\	152
16	1	5545776	5595775	Jinhua	scaffold3549.3	362956	364275	0	28	31	\	59
16	1	5545776	5595775	Jinhua	scaffold3549.3	364474	369407	0	36	45	\	81
16	1	5545776	5595775	Landrace	scaffold3521	2358406	2363344	0	28	60	\	88
16	1	5545776	5595775	Landrace	scaffold3521	2363555	2364880	4	18	15	\	37
16	1	5545776	5595775	Landrace	scaffold3521	2364882	2366749	78	34	23	\	135
16	1	5545776	5595775	Landrace	scaffold3521	2372041	2373913	0	43	18	\	61
16	1	5545776	5595775	Landrace	scaffold7061	40786	42702	0	3	1	\	4
16	1	5545776	5595775	Large White	scaffold36207.2	3715741	3720671	0	40	62	20	122
16	1	5545776	5595775	Large White	scaffold36207.2	3720866	3722178	0	24	33	3	60
16	1	5545776	5595775	Large White	scaffold36207.2	3722193	3724060	59	27	18	7	111
16	1	5545776	5595775	Large White	scaffold36207.2	3729314	3731193	0	29	32	3	64
16	1	5545776	5595775	Meishan	scaffold629	4746459	4748338	0	32	22	\	54
16	1	5545776	5595775	Meishan	scaffold629	4753584	4755458	45	29	40	\	114
16	1	5545776	5595775	Meishan	scaffold629	4755461	4756778	2	27	16	\	45
16	1	5545776	5595775	Meishan	scaffold629	4756979	4761923	0	28	64	\	92
16	1	5545776	5595775	Piétrain	scaffold31677	1083588	1085447	0	58	31	\	89
16	1	5545776	5595775	Piétrain	scaffold31677	1090584	1092448	45	38	14	\	97
16	1	5545776	5595775	Piétrain	scaffold31677	1092474	1093782	0	27	26	\	53
16	1	5545776	5595775	Piétrain	scaffold31677	1093985	1098921	0	38	80	\	118
16	1	5545776	5595775	Rongchang	scaffold6249.1	1920148	1922050	0	24	14	10	48
16	1	5545776	5595775	Rongchang	scaffold6249.1	1927265	1929124	54	19	12	0	85
16	1	5545776	5595775	Rongchang	scaffold6249.1	1929171	1930481	0	7	10	0	17
16	1	5545776	5595775	Rongchang	scaffold6249.1	1930686	1935614	0	34	50	10	94
16	1	5545776	5595775	Rongchang	scaffold6249.1	1935845	1939081	0	0	0	6	6
16	1	5545776	5595775	Tibetan wild boar	scaffold21198	104731	106623	1	22	\	2	25
16	1	5545776	5595775	Tibetan wild boar	scaffold21198	91131	96060	0	6	\	3	9
16	1	5545776	5595775	Tibetan wild boar	scaffold21198	96261	99459	61	30	\	8	99
18	1	6617656	6667655	Berkshire	scaffold14947.1	5190905	5191904	0	1	19	\	20
18	1	6617656	6667655	Berkshire	scaffold14947.1	5193447	5196938	66	82	98	\	246
18	1	6617656	6667655	Bamei	scaffold45977.1	2773647	2774653	0	0	6	\	6
18	1	6617656	6667655	Bamei	scaffold45977.1	2776284	2779750	40	93	92	\	225
18	1	6617656	6667655	Hampshire	scaffold28337.7	369424	370424	0	0	8	\	8
18	1	6617656	6667655	Hampshire	scaffold28337.7	371845	375332	47	121	93	\	261
18	1	6617656	6667655	Jinhua	scaffold3549.2	434638	436401	1	0	3	\	4
18	1	6617656	6667655	Jinhua	scaffold3549.2	620419	623903	58	81	106	\	245
18	1	6617656	6667655	Landrace	scaffold12685	637208	638206	0	0	8	\	8
18	1	6617656	6667655	Landrace	scaffold12685	639766	643256	65	74	64	\	203
18	1	6617656	6667655	Large White	scaffold36207.2	4763015	4768159	0	0	1	34	35
18	1	6617656	6667655	Large White	scaffold36207.2	4768364	4769371	0	0	14	9	23
18	1	6617656	6667655	Large White	scaffold36207.2	4770912	4774404	52	98	87	22	259
18	1	6617656	6667655	Meishan	scaffold629	3710784	3714269	52	96	89	\	237
18	1	6617656	6667655	Meishan	scaffold629	3715812	3716822	0	0	4	\	4
18	1	6617656	6667655	Piétrain	scaffold31677	34365	37838	34	107	99	\	240
18	1	6617656	6667655	Piétrain	scaffold31677	39379	40366	0	0	10	\	10
18	1	6617656	6667655	Rongchang	scaffold6249.1	883301	886784	47	48	53	13	161
18	1	6617656	6667655	Rongchang	scaffold6249.1	888340	889351	0	0	12	0	12
18	1	6617656	6667655	Rongchang	scaffold6249.1	889556	894690	0	0	0	9	9
18	1	6617656	6667655	Tibetan wild boar	scaffold11785.2	525815	534125	0	0	\	4	4
18	1	6617656	6667655	Tibetan wild boar	scaffold19753	659806	663314	33	27	\	8	68
19	1	6988352	7038351	Berkshire	scaffold14947.4	103814	104389	40	0	0	\	40
19	1	6988352	7038351	Berkshire	scaffold14947.4	105316	106653	8	28	5	\	41
19	1	6988352	7038351	Berkshire	scaffold14947.4	106853	107778	0	21	7	\	28
19	1	6988352	7038351	Berkshire	scaffold14947.4	108594	111871	0	5	27	\	32
19	1	6988352	7038351	Bamei	scaffold45977.1	3092229	3092774	12	0	0	\	12
19	1	6988352	7038351	Bamei	scaffold45977.1	3093714	3095052	11	13	6	\	30
19	1	6988352	7038351	Bamei	scaffold45977.1	3095276	3096200	0	18	23	\	41
19	1	6988352	7038351	Bamei	scaffold45977.1	3096372	3099951	0	9	49	\	58
19	1	6988352	7038351	Hampshire	scaffold28337.7	688845	689410	19	0	0	\	19
19	1	6988352	7038351	Hampshire	scaffold28337.7	690343	691695	11	16	4	\	31
19	1	6988352	7038351	Hampshire	scaffold28337.7	691882	692805	0	27	9	\	36
19	1	6988352	7038351	Hampshire	scaffold28337.7	693109	696665	0	29	43	\	72
19	1	6988352	7038351	Jinhua	scaffold3549.2	297062	303231	0	18	48	\	66
19	1	6988352	7038351	Jinhua	scaffold3549.2	303395	304331	0	21	27	\	48
19	1	6988352	7038351	Jinhua	scaffold3549.2	304515	305885	9	28	2	\	39
19	1	6988352	7038351	Jinhua	scaffold3549.2	306794	307363	41	0	0	\	41
19	1	6988352	7038351	Landrace	scaffold12685	955999	956566	21	0	0	\	21
19	1	6988352	7038351	Landrace	scaffold12685	957505	958833	14	14	1	\	29
19	1	6988352	7038351	Landrace	scaffold12685	959046	959977	0	25	20	\	45
19	1	6988352	7038351	Landrace	scaffold12685	960143	963739	0	15	37	\	52
19	1	6988352	7038351	Large White	scaffold36207.2	5087868	5088434	26	0	1	0	27
19	1	6988352	7038351	Large White	scaffold36207.2	5089382	5090703	10	7	4	0	21
19	1	6988352	7038351	Large White	scaffold36207.2	5090916	5091841	0	19	15	0	34
19	1	6988352	7038351	Large White	scaffold36207.2	5092028	5095623	0	16	63	3	82
19	1	6988352	7038351	Large White	scaffold36207.2	5095872	5099891	0	0	0	7	7
19	1	6988352	7038351	Meishan	scaffold629	3391036	3394281	0	21	48	\	69
19	1	6988352	7038351	Meishan	scaffold629	3394445	3395373	0	17	17	\	34
19	1	6988352	7038351	Meishan	scaffold629	3395567	3396912	6	14	4	\	24
19	1	6988352	7038351	Meishan	scaffold629	3397831	3398419	23	0	0	\	23
19	1	6988352	7038351	Piétrain	scaffold12907.3	16619	18784	0	38	46	\	84
19	1	6988352	7038351	Piétrain	scaffold12907.3	18962	19896	0	25	21	\	46
19	1	6988352	7038351	Piétrain	scaffold12907.3	20107	21452	2	19	3	\	24
19	1	6988352	7038351	Piétrain	scaffold12907.3	22370	22937	18	0	0	\	18
19	1	6988352	7038351	Rongchang	scaffold6249.1	556785	560837	0	0	0	9	9
19	1	6988352	7038351	Rongchang	scaffold6249.1	561234	564693	0	15	44	1	60
19	1	6988352	7038351	Rongchang	scaffold6249.1	564865	565800	0	20	9	0	29
19	1	6988352	7038351	Rongchang	scaffold6249.1	565978	567349	14	12	2	0	28
19	1	6988352	7038351	Rongchang	scaffold6249.1	568273	568850	25	0	0	0	25
19	1	6988352	7038351	Rongchang	scaffold6249.1	598657	600022	0	3	1	0	4
19	1	6988352	7038351	Tibetan wild boar	scaffold19863	88855	90177	0	0	\	4	4
19	1	6988352	7038351	Tibetan wild boar	scaffold7253	267995	268581	7	0	\	0	7
19	1	6988352	7038351	Tibetan wild boar	scaffold7253	269476	270859	10	1	\	0	11
19	1	6988352	7038351	Tibetan wild boar	scaffold7253	271026	271968	0	12	\	0	12
20	1	7569003	7619002	Berkshire	scaffold14947.4	676870	680846	190	155	172	\	517
20	1	7569003	7619002	Berkshire	scaffold14947.4	689210	691158	0	24	33	\	57
20	1	7569003	7619002	Berkshire	scaffold14947.4	691172	694689	0	0	12	\	12
20	1	7569003	7619002	Berkshire	scaffold14947.4	709652	710173	0	16	17	\	33
20	1	7569003	7619002	Berkshire	scaffold14947.4	710891	712124	0	2	3	\	5
20	1	7569003	7619002	Berkshire	scaffold14947.4	718251	718837	0	8	11	\	19
20	1	7569003	7619002	Berkshire	scaffold420190	12	572	0	1	3	\	4
20	1	7569003	7619002	Berkshire	scaffold452091	137	1081	0	17	27	\	44
20	1	7569003	7619002	Bamei	scaffold45977.1	3663106	3666686	90	165	149	\	404
20	1	7569003	7619002	Bamei	scaffold45977.1	3674903	3680401	0	21	31	\	52
20	1	7569003	7619002	Bamei	scaffold45977.1	3694651	3695618	0	10	15	\	25
20	1	7569003	7619002	Bamei	scaffold635746	1	527	0	4	2	\	6
20	1	7569003	7619002	Hampshire	scaffold28337.7	1260427	1264396	111	224	148	\	483
20	1	7569003	7619002	Hampshire	scaffold28337.7	1272459	1274386	0	22	37	\	59
20	1	7569003	7619002	Hampshire	scaffold28337.7	1274412	1277919	0	0	7	\	7
20	1	7569003	7619002	Hampshire	scaffold28337.7	1292909	1293880	0	22	26	\	48
20	1	7569003	7619002	Hampshire	scaffold28337.7	1293904	1294437	0	8	9	\	17
20	1	7569003	7619002	Hampshire	scaffold28337.7	1295078	1296405	0	1	3	\	4
20	1	7569003	7619002	Hampshire	scaffold28337.7	1302514	1303101	0	11	14	\	25
20	1	7569003	7619002	Jinhua	scaffold3549.1	2056829	2057419	0	7	6	\	13
20	1	7569003	7619002	Jinhua	scaffold3549.1	2063545	2064875	0	0	7	\	7
20	1	7569003	7619002	Jinhua	scaffold3549.1	2065500	2065999	0	14	7	\	21
20	1	7569003	7619002	Jinhua	scaffold3549.1	2066083	2067054	0	27	36	\	63
20	1	7569003	7619002	Jinhua	scaffold3549.1	2081357	2086799	0	26	44	\	70
20	1	7569003	7619002	Jinhua	scaffold3549.1	2095234	2098801	132	230	175	\	537
20	1	7569003	7619002	Landrace	scaffold12685	1527481	1531056	153	131	112	\	396
20	1	7569003	7619002	Landrace	scaffold12685	1539467	1541400	0	27	36	\	63
20	1	7569003	7619002	Landrace	scaffold12685	1559206	1560181	0	18	28	\	46
20	1	7569003	7619002	Landrace	scaffold12685	1568786	1569360	0	7	8	\	15
20	1	7569003	7619002	Large White	scaffold36207.2	5659429	5663018	131	115	139	10	395
20	1	7569003	7619002	Large White	scaffold36207.2	5671889	5673851	0	29	45	0	74
20	1	7569003	7619002	Large White	scaffold36207.2	5673868	5677393	0	0	2	11	13
20	1	7569003	7619002	Large White	scaffold36207.2	5692646	5693613	0	18	37	7	62
20	1	7569003	7619002	Large White	scaffold36207.2	5694813	5696102	0	0	0	9	9
20	1	7569003	7619002	Large White	scaffold36207.2	5702247	5702827	0	2	17	0	19
20	1	7569003	7619002	Large White	scaffold497830	15	994	12	12	19	4	47
20	1	7569003	7619002	Meishan	scaffold629	2793003	2793502	0	9	12	\	21
20	1	7569003	7619002	Meishan	scaffold629	2793569	2794549	0	25	35	\	60
20	1	7569003	7619002	Meishan	scaffold629	2808267	2814351	0	26	54	\	80
20	1	7569003	7619002	Meishan	scaffold629	2822595	2826184	119	144	128	\	391
20	1	7569003	7619002	Meishan	scaffold651422	1	924	14	22	31	\	67
20	1	7569003	7619002	Meishan	scaffold682967	1	523	0	2	2	\	4
20	1	7569003	7619002	Piétrain	scaffold26583	54743	58327	85	211	172	\	468
20	1	7569003	7619002	Piétrain	scaffold26583	66729	68671	0	32	39	\	71
20	1	7569003	7619002	Piétrain	scaffold26583	68689	72810	0	0	6	\	6
20	1	7569003	7619002	Piétrain	scaffold26583	86475	87445	0	36	37	\	73
20	1	7569003	7619002	Piétrain	scaffold26583	87516	88020	0	11	15	\	26
20	1	7569003	7619002	Piétrain	scaffold26583	88664	89926	0	1	5	\	6
20	1	7569003	7619002	Piétrain	scaffold26583	96094	96622	0	5	8	\	13
20	1	7569003	7619002	Rongchang	scaffold29953.1	12637	18101	0	23	21	17	61
20	1	7569003	7619002	Rongchang	scaffold29953.1	33747	34724	0	13	8	5	26
20	1	7569003	7619002	Rongchang	scaffold29953.1	43379	43941	0	5	7	0	12
20	1	7569003	7619002	Rongchang	scaffold29953.1	649	4643	125	100	94	4	323
20	1	7569003	7619002	Tibetan wild boar	scaffold7253	863146	867012	86	42	\	2	130
20	1	7569003	7619002	Tibetan wild boar	scaffold7253	867042	868217	23	7	\	2	32
20	1	7569003	7619002	Tibetan wild boar	scaffold7253	878712	882847	0	0	\	7	7
20	1	7569003	7619002	Tibetan wild boar	scaffold7253	900512	901284	0	0	\	4	4
21	1	8445316	8495315	Berkshire	scaffold14947.4	1362523	1363870	41	12	11	\	64
21	1	8445316	8495315	Bamei	scaffold45977.1	4348628	4350024	20	15	19	\	54
21	1	8445316	8495315	Hampshire	scaffold28337.7	1950551	1951958	40	23	16	\	79
21	1	8445316	8495315	Jinhua	scaffold3549.1	1408215	1409638	44	27	8	\	79
21	1	8445316	8495315	Landrace	scaffold12685	2214394	2215811	44	11	13	\	68
21	1	8445316	8495315	Large White	scaffold163.3	2903676	2905581	0	0	0	9	9
21	1	8445316	8495315	Large White	scaffold163.3	3066068	3067463	32	12	20	8	72
21	1	8445316	8495315	Meishan	scaffold629	2138873	2140284	30	9	15	\	54
21	1	8445316	8495315	Piétrain	scaffold26583	742759	744162	49	25	15	\	89
21	1	8445316	8495315	Rongchang	scaffold29953.1	687577	688971	32	4	4	0	40
21	1	8445316	8495315	Rongchang	scaffold29953.1	847913	849820	0	0	0	4	4
21	1	8445316	8495315	Tibetan wild boar	scaffold20771.1	361087	362498	21	5	\	0	26
22	1	8641345	8691344	Hampshire	scaffold28337.7	2191415	2192159	0	0	6	\	6
22	1	8641345	8691344	Landrace	scaffold12685	2457746	2458475	0	0	5	\	5
22	1	8641345	8691344	Piétrain	scaffold26583	984464	985197	0	0	5	\	5
22	1	8641345	8691344	Rongchang	scaffold29953.1	930370	931128	0	0	3	1	4
22	1	8641345	8691344	Tibetan wild boar	scaffold20771.2	252232	253002	0	0	\	4	4
26	1	10321320	10371319	Berkshire	scaffold37277	335367	336769	44	27	33	\	104
26	1	10321320	10371319	Berkshire	scaffold37277	562704	564476	0	0	38	\	38
26	1	10321320	10371319	Bamei	scaffold53281	769748	771125	31	37	39	\	107
26	1	10321320	10371319	Bamei	scaffold53281	996717	998491	0	0	23	\	23
26	1	10321320	10371319	Bamei	scaffold631486	1	1228	0	0	12	\	12
26	1	10321320	10371319	Hampshire	scaffold15479.4	2748951	2750717	0	0	26	\	26
26	1	10321320	10371319	Hampshire	scaffold15479.4	2975298	2976646	37	36	22	\	95
26	1	10321320	10371319	Jinhua	scaffold44955	152753	154138	46	41	34	\	121
26	1	10321320	10371319	Jinhua	scaffold44955	378185	379970	0	0	41	\	41
26	1	10321320	10371319	Landrace	scaffold12685	3787414	3788820	46	38	25	\	109
26	1	10321320	10371319	Landrace	scaffold12685	4014803	4016580	0	0	15	\	15
26	1	10321320	10371319	Large White	scaffold163.3	1260900	1262671	0	0	37	11	48
26	1	10321320	10371319	Large White	scaffold163.3	1490098	1491483	55	26	53	10	144
26	1	10321320	10371319	Meishan	scaffold629	333119	334898	0	0	33	\	33
26	1	10321320	10371319	Meishan	scaffold629	561875	563253	27	28	24	\	79
26	1	10321320	10371319	Piétrain	scaffold32923	154988	156736	0	0	29	\	29
26	1	10321320	10371319	Piétrain	scaffold9587	4953	6349	30	39	38	\	107
26	1	10321320	10371319	Rongchang	scaffold29953.1	2266567	2267881	40	16	20	3	79
26	1	10321320	10371319	Rongchang	scaffold29953.1	2496119	2497870	0	0	18	2	20
26	1	10321320	10371319	Tibetan wild boar	scaffold21453	766846	768184	27	2	\	0	29
27	1	10583875	10633874	Berkshire	scaffold37277	586660	587172	16	6	6	\	28
27	1	10583875	10633874	Berkshire	scaffold37277	599681	602977	0	2	44	\	46
27	1	10583875	10633874	Berkshire	scaffold37277	663373	664171	0	0	4	\	4
27	1	10583875	10633874	Bamei	scaffold53281	1021067	1021573	8	8	16	\	32
27	1	10583875	10633874	Bamei	scaffold53281	1034093	1037335	0	0	39	\	39
27	1	10583875	10633874	Bamei	scaffold53281	1097399	1098191	0	0	6	\	6
27	1	10583875	10633874	Hampshire	scaffold15479.4	2649458	2650252	0	2	16	\	18
27	1	10583875	10633874	Hampshire	scaffold15479.4	2710444	2713705	0	1	67	\	68
27	1	10583875	10633874	Jinhua	scaffold44955	402589	403103	6	13	6	\	25
27	1	10583875	10633874	Jinhua	scaffold44955	415631	418898	0	0	47	\	47
27	1	10583875	10633874	Jinhua	scaffold44955	475752	476547	0	0	9	\	9
27	1	10583875	10633874	Landrace	scaffold12685	4051637	4054893	0	1	32	\	33
27	1	10583875	10633874	Large White	scaffold163.3	1161388	1162176	0	1	10	5	16
27	1	10583875	10633874	Large White	scaffold163.3	1162416	1168071	0	0	0	17	17
27	1	10583875	10633874	Large White	scaffold163.3	1214203	1216748	0	0	0	5	5
27	1	10583875	10633874	Large White	scaffold163.3	1217381	1218750	0	0	0	4	4
27	1	10583875	10633874	Large White	scaffold163.3	1222482	1225759	0	2	44	12	58
27	1	10583875	10633874	Meishan	scaffold5377.4	512085	512737	0	4	0	\	4
27	1	10583875	10633874	Meishan	scaffold629	236695	237495	0	1	4	\	5
27	1	10583875	10633874	Meishan	scaffold629	294536	297807	0	1	45	\	46
27	1	10583875	10633874	Piétrain	scaffold32923	116682	119979	0	2	63	\	65
27	1	10583875	10633874	Piétrain	scaffold32923	55819	56604	0	1	5	\	6
27	1	10583875	10633874	Rongchang	scaffold29953.1	2519905	2520417	10	2	6	2	20
27	1	10583875	10633874	Rongchang	scaffold29953.1	2532967	2536241	0	1	39	15	55
27	1	10583875	10633874	Rongchang	scaffold29953.1	2536444	2537687	0	0	0	4	4
27	1	10583875	10633874	Rongchang	scaffold29953.1	2538741	2539951	0	0	0	7	7
27	1	10583875	10633874	Rongchang	scaffold29953.1	2540023	2541402	0	0	0	12	12
27	1	10583875	10633874	Rongchang	scaffold29953.1	2590696	2596329	0	0	5	5	10
27	1	10583875	10633874	Rongchang	scaffold29953.1	2596574	2597352	0	3	5	0	8
27	1	10583875	10633874	Tibetan wild boar	scaffold21453	492759	493913	0	0	\	4	4
27	1	10583875	10633874	Tibetan wild boar	scaffold21453	496381	499614	0	0	\	16	16
27	1	10583875	10633874	Tibetan wild boar	scaffold21453	512147	512652	21	3	\	0	24
28	1	11070401	11120400	Landrace	scaffold29361.2	253885	257394	4	0	0	\	4
29	1	11583024	11633023	Berkshire	scaffold8845.2	178604	181587	0	22	62	\	84
29	1	11583024	11633023	Berkshire	scaffold8845.2	181834	183733	41	26	39	\	106
29	1	11583024	11633023	Berkshire	scaffold8845.2	183802	184854	36	16	17	\	69
29	1	11583024	11633023	Berkshire	scaffold8845.2	45718	50359	74	99	112	\	285
29	1	11583024	11633023	Berkshire	scaffold8845.2	50405	54219	0	2	30	\	32
29	1	11583024	11633023	Bamei	scaffold46389	513706	518333	56	74	99	\	229
29	1	11583024	11633023	Bamei	scaffold46389	518388	522222	0	5	17	\	22
29	1	11583024	11633023	Bamei	scaffold46389	646935	649924	0	27	37	\	64
29	1	11583024	11633023	Bamei	scaffold46389	650180	652080	10	42	40	\	92
29	1	11583024	11633023	Bamei	scaffold46389	652148	653188	30	12	23	\	65
29	1	11583024	11633023	Hampshire	scaffold15479.4	1709602	1710653	18	18	27	\	63
29	1	11583024	11633023	Hampshire	scaffold15479.4	1710709	1712614	25	59	37	\	121
29	1	11583024	11633023	Hampshire	scaffold15479.4	1712881	1715895	0	47	48	\	95
29	1	11583024	11633023	Hampshire	scaffold15479.4	1716075	1719244	0	0	4	\	4
29	1	11583024	11633023	Hampshire	scaffold15479.4	1840418	1844240	0	4	48	\	52
29	1	11583024	11633023	Hampshire	scaffold15479.4	1844282	1848921	65	135	88	\	288
29	1	11583024	11633023	Jinhua	scaffold44955	1274278	1278942	61	111	121	\	293
29	1	11583024	11633023	Jinhua	scaffold44955	1278972	1282809	0	1	16	\	17
29	1	11583024	11633023	Jinhua	scaffold44955	1407320	1410308	0	21	42	\	63
29	1	11583024	11633023	Jinhua	scaffold44955	1410559	1412469	21	57	40	\	118
29	1	11583024	11633023	Jinhua	scaffold44955	1412521	1413562	28	19	15	\	62
29	1	11583024	11633023	Landrace	scaffold28947	736051	740679	76	99	75	\	250
29	1	11583024	11633023	Landrace	scaffold28947	740728	744552	0	8	11	\	19
29	1	11583024	11633023	Landrace	scaffold28947	869315	872316	0	34	44	\	78
29	1	11583024	11633023	Landrace	scaffold28947	872567	874477	40	21	28	\	89
29	1	11583024	11633023	Landrace	scaffold28947	874536	875581	47	9	14	\	70
29	1	11583024	11633023	Large White	scaffold163.3	226914	227961	29	12	20	7	68
29	1	11583024	11633023	Large White	scaffold163.3	228023	229927	31	34	37	3	105
29	1	11583024	11633023	Large White	scaffold163.3	230198	233180	0	27	62	7	96
29	1	11583024	11633023	Large White	scaffold163.3	233351	236526	0	0	4	10	14
29	1	11583024	11633023	Large White	scaffold163.3	356150	356672	0	0	0	5	5
29	1	11583024	11633023	Large White	scaffold163.3	356882	360706	0	5	30	22	57
29	1	11583024	11633023	Large White	scaffold163.3	360737	365366	74	100	88	28	290
29	1	11583024	11633023	Meishan	scaffold5377.4	479265	480322	34	14	24	\	72
29	1	11583024	11633023	Meishan	scaffold5377.4	480387	482291	25	33	38	\	96
29	1	11583024	11633023	Meishan	scaffold5377.4	482545	485533	0	41	53	\	94
29	1	11583024	11633023	Meishan	scaffold5377.4	609706	613534	0	9	26	\	35
29	1	11583024	11633023	Meishan	scaffold5377.4	613578	618200	54	85	116	\	255
29	1	11583024	11633023	Piétrain	scaffold27687	734564	739212	47	145	113	\	305
29	1	11583024	11633023	Piétrain	scaffold27687	739235	743063	0	7	42	\	49
29	1	11583024	11633023	Piétrain	scaffold27687	867490	870480	0	51	49	\	100
29	1	11583024	11633023	Piétrain	scaffold27687	870735	872628	18	60	44	\	122
29	1	11583024	11633023	Piétrain	scaffold27687	872695	873732	32	16	31	\	79
29	1	11583024	11633023	Rongchang	scaffold29953.1	3393097	3397711	68	73	68	4	213
29	1	11583024	11633023	Rongchang	scaffold29953.1	3397785	3401602	0	5	28	18	51
29	1	11583024	11633023	Rongchang	scaffold29953.1	3522775	3525954	0	0	1	13	14
29	1	11583024	11633023	Rongchang	scaffold29953.1	3526127	3529121	0	25	39	6	70
29	1	11583024	11633023	Rongchang	scaffold29953.1	3529340	3531230	21	25	21	9	76
29	1	11583024	11633023	Rongchang	scaffold29953.1	3531286	3532343	19	10	17	0	46
29	1	11583024	11633023	Tibetan wild boar	scaffold21081.2	1678547	1679601	20	6	\	2	28
29	1	11583024	11633023	Tibetan wild boar	scaffold21081.2	1679659	1681569	18	8	\	8	34
29	1	11583024	11633023	Tibetan wild boar	scaffold21081.2	1682126	1685105	0	2	\	3	5
29	1	11583024	11633023	Tibetan wild boar	scaffold21081.2	1685268	1688452	0	0	\	8	8
29	1	11583024	11633023	Tibetan wild boar	scaffold21081.2	1815127	1818962	0	0	\	5	5
29	1	11583024	11633023	Tibetan wild boar	scaffold21081.2	1818999	1823645	48	39	\	24	111
30	1	11780017	11830016	Berkshire	scaffold8845.2	334466	335226	0	10	23	\	33
30	1	11780017	11830016	Berkshire	scaffold8845.2	335744	338374	0	51	41	\	92
30	1	11780017	11830016	Bamei	scaffold46389	800852	801663	0	13	13	\	26
30	1	11780017	11830016	Bamei	scaffold46389	801886	804830	0	43	54	\	97
30	1	11780017	11830016	Hampshire	scaffold15479.4	1557452	1560099	0	60	57	\	117
30	1	11780017	11830016	Hampshire	scaffold15479.4	1560607	1561383	0	30	15	\	45
30	1	11780017	11830016	Jinhua	scaffold44955	1561318	1562147	0	14	10	\	24
30	1	11780017	11830016	Jinhua	scaffold44955	1562654	1565294	0	55	47	\	102
30	1	11780017	11830016	Landrace	scaffold28947	1022932	1023692	0	7	7	\	14
30	1	11780017	11830016	Landrace	scaffold28947	1024198	1026838	0	41	19	\	60
30	1	11780017	11830016	Large White	scaffold163.3	73602	76535	0	48	60	14	122
30	1	11780017	11830016	Large White	scaffold163.3	76754	77533	0	10	14	0	24
30	1	11780017	11830016	Meishan	scaffold5377.4	327258	329900	0	38	56	\	94
30	1	11780017	11830016	Meishan	scaffold5377.4	330401	331234	0	16	19	\	35
30	1	11780017	11830016	Piétrain	scaffold27687	1023174	1023945	0	20	12	\	32
30	1	11780017	11830016	Piétrain	scaffold27687	1024161	1027103	0	61	82	\	143
30	1	11780017	11830016	Rongchang	scaffold29953.1	3678989	3679809	0	9	11	1	21
30	1	11780017	11830016	Rongchang	scaffold29953.1	3680025	3682965	0	30	41	6	77
30	1	11780017	11830016	Tibetan wild boar	scaffold21081.2	1526999	1529114	0	28	\	13	41
30	1	11780017	11830016	Tibetan wild boar	scaffold21081.2	1529160	1529668	0	9	\	0	9
30	1	11780017	11830016	Tibetan wild boar	scaffold21081.2	1530212	1531004	0	4	\	1	5
31	1	11948556	11998555	Berkshire	scaffold8845.2	360968	363414	69	44	49	\	162
31	1	11948556	11998555	Bamei	scaffold46389	827354	829788	39	45	56	\	140
31	1	11948556	11998555	Hampshire	scaffold15479.4	1532531	1534959	41	61	33	\	135
31	1	11948556	11998555	Jinhua	scaffold44955	1587892	1590316	40	42	44	\	126
31	1	11948556	11998555	Landrace	scaffold28947	1049582	1052004	35	28	19	\	82
31	1	11948556	11998555	Landrace	scaffold28947	1052361	1052869	0	4	4	\	8
31	1	11948556	11998555	Landrace	scaffold471897	25	2128	19	10	9	\	38
31	1	11948556	11998555	Large White	scaffold163.3	48562	51002	70	53	40	8	171
31	1	11948556	11998555	Meishan	scaffold5377.4	301656	304091	48	27	45	\	120
31	1	11948556	11998555	Piétrain	scaffold27687	1049665	1052145	41	65	36	\	142
31	1	11948556	11998555	Rongchang	scaffold29953.1	3705523	3707963	38	32	26	6	102
31	1	11948556	11998555	Tibetan wild boar	scaffold21081.2	1500656	1503052	48	11	\	8	67
32	1	12134815	12184814	Berkshire	scaffold8845.2	812467	813313	4	4	4	\	12
32	1	12134815	12184814	Berkshire	scaffold8845.2	813361	813918	12	5	6	\	23
32	1	12134815	12184814	Bamei	scaffold48337	5798703	5799259	6	3	6	\	15
32	1	12134815	12184814	Bamei	scaffold48337	5799374	5800166	10	3	4	\	17
32	1	12134815	12184814	Hampshire	scaffold15479.4	1081536	1082963	14	6	16	\	36
32	1	12134815	12184814	Jinhua	scaffold44955	2040575	2041440	3	4	7	\	14
32	1	12134815	12184814	Jinhua	scaffold44955	2041478	2042054	10	4	4	\	18
32	1	12134815	12184814	Landrace	scaffold28947	1500308	1501112	6	1	1	\	8
32	1	12134815	12184814	Landrace	scaffold28947	1501115	1501682	9	6	3	\	18
32	1	12134815	12184814	Large White	scaffold163.2	1107973	1108556	8	4	3	0	15
32	1	12134815	12184814	Large White	scaffold163.2	1108643	1109421	3	7	7	0	17
32	1	12134815	12184814	Meishan	scaffold5377.3	445312	446181	6	1	13	\	20
32	1	12134815	12184814	Piétrain	scaffold27687	1500279	1501678	10	11	5	\	26
32	1	12134815	12184814	Rongchang	scaffold29953.2	56242	57110	10	7	3	0	20
32	1	12134815	12184814	Rongchang	scaffold29953.2	57162	57722	1	6	6	4	17
33	1	12486194	12536193	Berkshire	scaffold8845.2	933428	934518	0	2	10	\	12
33	1	12486194	12536193	Bamei	scaffold48337	5678379	5679470	0	1	11	\	12
33	1	12486194	12536193	Hampshire	scaffold15479.4	961616	962669	0	10	17	\	27
33	1	12486194	12536193	Jinhua	scaffold44955	2161116	2162240	0	2	13	\	15
33	1	12486194	12536193	Landrace	scaffold28947	1620324	1621426	0	9	12	\	21
33	1	12486194	12536193	Large White	scaffold163.2	988592	989549	0	5	13	3	21
33	1	12486194	12536193	Meishan	scaffold5377.3	324972	326081	0	2	10	\	12
33	1	12486194	12536193	Piétrain	scaffold27687	1620066	1621139	0	3	13	\	16
33	1	12486194	12536193	Rongchang	scaffold29953.2	176773	177869	0	5	8	3	16
34	1	13273680	13323679	Berkshire	scaffold8845.3	490626	491444	0	14	30	\	44
34	1	13273680	13323679	Berkshire	scaffold8845.3	491930	493813	91	36	54	\	181
34	1	13273680	13323679	Bamei	scaffold48337	4787454	4789356	45	45	42	\	132
34	1	13273680	13323679	Hampshire	scaffold15479.4	66674	68568	60	43	39	\	142
34	1	13273680	13323679	Hampshire	scaffold15479.4	69049	69862	0	20	17	\	37
34	1	13273680	13323679	Jinhua	scaffold44955	3052310	3053125	0	22	24	\	46
34	1	13273680	13323679	Jinhua	scaffold44955	3053623	3055494	78	49	38	\	165
34	1	13273680	13323679	Landrace	scaffold28947	2510606	2512497	70	44	34	\	148
34	1	13273680	13323679	Large White	scaffold163.2	92377	94264	66	39	51	19	175
34	1	13273680	13323679	Large White	scaffold163.2	94742	95548	0	11	32	6	49
34	1	13273680	13323679	Meishan	scaffold5377.1	381972	383867	87	26	41	\	154
34	1	13273680	13323679	Piétrain	scaffold27687	2514223	2515054	0	25	23	\	48
34	1	13273680	13323679	Piétrain	scaffold27687	2515535	2517409	37	47	56	\	140
34	1	13273680	13323679	Rongchang	scaffold29953.4	23292	25195	54	35	28	8	125
34	1	13273680	13323679	Tibetan wild boar	scaffold21081.2	31922	33831	32	16	\	4	52
35	1	13507699	13557698	Berkshire	scaffold8845.3	483880	485946	22	35	11	\	68
35	1	13507699	13557698	Berkshire	scaffold8845.3	485978	486534	8	0	0	\	8
35	1	13507699	13557698	Bamei	scaffold48337	4789751	4790629	27	9	0	\	36
35	1	13507699	13557698	Bamei	scaffold48337	4794711	4797398	27	23	24	\	74
35	1	13507699	13557698	Hampshire	scaffold15479.4	73972	74534	19	0	0	\	19
35	1	13507699	13557698	Hampshire	scaffold15479.4	74566	75379	13	1	1	\	15
35	1	13507699	13557698	Hampshire	scaffold15479.4	75382	76615	0	32	6	\	38
35	1	13507699	13557698	Jinhua	scaffold44955	3045554	3046807	0	23	11	\	34
35	1	13507699	13557698	Jinhua	scaffold44955	3046813	3047630	18	5	0	\	23
35	1	13507699	13557698	Jinhua	scaffold44955	3047658	3048245	19	0	0	\	19
35	1	13507699	13557698	Landrace	scaffold28947	2502530	2504602	16	23	5	\	44
35	1	13507699	13557698	Landrace	scaffold28947	2504625	2505192	20	0	0	\	20
35	1	13507699	13557698	Landrace	scaffold28947	2509306	2510132	36	0	1	\	37
35	1	13507699	13557698	Large White	scaffold163.2	100242	101050	11	7	0	0	18
35	1	13507699	13557698	Large White	scaffold163.2	101056	102312	0	16	14	0	30
35	1	13507699	13557698	Large White	scaffold163.2	99653	100220	28	0	0	0	28
35	1	13507699	13557698	Meishan	scaffold5377.1	384239	385166	39	5	0	\	44
35	1	13507699	13557698	Meishan	scaffold5377.1	389251	389818	14	0	0	\	14
35	1	13507699	13557698	Meishan	scaffold5377.1	389870	391927	12	44	29	\	85
35	1	13507699	13557698	Piétrain	scaffold27687	2507494	2508751	0	31	11	\	42
35	1	13507699	13557698	Piétrain	scaffold27687	2508753	2509555	8	2	1	\	11
35	1	13507699	13557698	Piétrain	scaffold27687	2509588	2510173	13	0	0	\	13
35	1	13507699	13557698	Rongchang	scaffold29953.4	15239	16485	0	19	4	0	23
35	1	13507699	13557698	Rongchang	scaffold29953.4	16488	17919	32	3	0	0	35
35	1	13507699	13557698	Rongchang	scaffold29953.4	21990	22820	30	1	0	0	31
35	1	13507699	13557698	Tibetan wild boar	scaffold21081.2	34189	35120	25	8	\	0	33
35	1	13507699	13557698	Tibetan wild boar	scaffold21081.2	39234	39783	20	2	\	2	24
35	1	13507699	13557698	Tibetan wild boar	scaffold21081.2	39816	41891	8	18	\	0	26
36	1	13905272	13955271	Berkshire	scaffold35807	227364	230313	4	0	0	\	4
36	1	13905272	13955271	Hampshire	scaffold2775.1	820141	831244	4	1	2	\	7
36	1	13905272	13955271	Landrace	scaffold28625	1005805	1020278	2	0	2	\	4
36	1	13905272	13955271	Meishan	scaffold47237	98390	100800	0	1	4	\	5
37	1	14520452	14570451	Berkshire	scaffold8845.4	873507	874642	51	38	30	\	119
37	1	14520452	14570451	Berkshire	scaffold8845.4	875017	876290	9	36	25	\	70
37	1	14520452	14570451	Bamei	scaffold48337	3462813	3464083	3	26	33	\	62
37	1	14520452	14570451	Bamei	scaffold48337	3464478	3465671	27	32	26	\	85
37	1	14520452	14570451	Hampshire	scaffold15479.2	1284658	1285915	6	40	32	\	78
37	1	14520452	14570451	Hampshire	scaffold15479.2	1286300	1287461	42	40	40	\	122
37	1	14520452	14570451	Jinhua	scaffold6393.4	1464797	1466067	9	39	31	\	79
37	1	14520452	14570451	Jinhua	scaffold6393.4	1466453	1467642	44	54	34	\	132
37	1	14520452	14570451	Landrace	scaffold28947	3831266	3832211	22	16	13	\	51
37	1	14520452	14570451	Landrace	scaffold28947	3832597	3833864	5	27	24	\	56
37	1	14520452	14570451	Landrace	scaffold446178	1	813	19	6	8	\	33
37	1	14520452	14570451	Large White	scaffold9645	263987	265119	29	25	19	3	76
37	1	14520452	14570451	Large White	scaffold9645	265527	266781	15	26	29	0	70
37	1	14520452	14570451	Meishan	scaffold5151.4	165159	166430	3	43	41	\	87
37	1	14520452	14570451	Meishan	scaffold5151.4	166829	168041	30	38	26	\	94
37	1	14520452	14570451	Piétrain	scaffold27687	3836030	3837226	22	41	33	\	96
37	1	14520452	14570451	Piétrain	scaffold27687	3837613	3838867	5	42	27	\	74
37	1	14520452	14570451	Rongchang	scaffold29953.4	1345392	1346576	39	12	17	5	73
37	1	14520452	14570451	Rongchang	scaffold29953.4	1346973	1348249	6	21	25	3	55
37	1	14520452	14570451	Tibetan wild boar	scaffold18191	468391	469606	30	6	\	2	38
37	1	14520452	14570451	Tibetan wild boar	scaffold18191	469966	471247	2	9	\	0	11
38	1	14974625	15024624	Berkshire	scaffold8845.4	1060672	1061918	50	35	38	\	123
38	1	14974625	15024624	Berkshire	scaffold8845.4	1178771	1179765	0	13	20	\	33
38	1	14974625	15024624	Bamei	scaffold48337	3155309	3156335	0	16	17	\	33
38	1	14974625	15024624	Bamei	scaffold48337	3273226	3274450	22	24	27	\	73
38	1	14974625	15024624	Hampshire	scaffold15479.2	1098935	1100150	26	38	29	\	93
38	1	14974625	15024624	Hampshire	scaffold15479.2	981791	982381	0	10	7	\	17
38	1	14974625	15024624	Jinhua	scaffold6393.4	1158312	1159335	0	23	31	\	54
38	1	14974625	15024624	Jinhua	scaffold6393.4	1276199	1277449	38	27	29	\	94
38	1	14974625	15024624	Landrace	scaffold28947	4023142	4024856	50	41	27	\	118
38	1	14974625	15024624	Landrace	scaffold28947	4141466	4142491	0	15	13	\	28
38	1	14974625	15024624	Large White	scaffold9645	452015	453265	28	13	36	13	90
38	1	14974625	15024624	Large White	scaffold9645	568883	569898	0	19	25	4	48
38	1	14974625	15024624	Large White	scaffold9645	581482	584957	0	0	0	19	19
38	1	14974625	15024624	Meishan	scaffold5151.2	1111025	1112027	0	6	14	\	20
38	1	14974625	15024624	Meishan	scaffold5151.2	1229308	1230547	40	19	30	\	89
38	1	14974625	15024624	Piétrain	scaffold27687	4026562	4027810	19	38	25	\	82
38	1	14974625	15024624	Piétrain	scaffold27687	4144056	4145081	0	14	24	\	38
38	1	14974625	15024624	Rongchang	scaffold29953.4	1535218	1536460	24	12	24	0	60
38	1	14974625	15024624	Rongchang	scaffold29953.4	1654999	1656015	0	8	14	4	26
38	1	14974625	15024624	Tibetan wild boar	scaffold19169	75389	77140	33	7	\	2	42
38	1	14974625	15024624	Tibetan wild boar	scaffold20481.1	81630	85115	0	0	\	5	5
39	1	15177493	15227492	Berkshire	scaffold8845.4	1271959	1274229	0	0	5	\	5
39	1	15177493	15227492	Bamei	scaffold48337	3062839	3065108	0	0	4	\	4
39	1	15177493	15227492	Hampshire	scaffold15479.2	888837	891103	0	0	8	\	8
39	1	15177493	15227492	Landrace	scaffold28947	4232853	4235131	0	0	12	\	12
39	1	15177493	15227492	Large White	scaffold9645	657822	659110	0	0	0	5	5
39	1	15177493	15227492	Large White	scaffold9645	659565	661846	0	0	9	3	12
39	1	15177493	15227492	Piétrain	scaffold27687	4236016	4238288	0	0	7	\	7
39	1	15177493	15227492	Rongchang	scaffold29953.4	1745991	1748265	0	0	14	13	27
40	1	16262950	16312957	Large White	scaffold9645	1466644	1468169	0	0	0	4	4
40	1	16262950	16312957	Rongchang	scaffold29953.4	2551395	2552885	0	0	0	13	13
40	1	16262950	16312957	Rongchang	scaffold29953.4	2554762	2557974	0	0	0	6	6
40	1	16262950	16312957	Tibetan wild boar	scaffold20481.2	828564	830351	0	0	\	5	5
40	1	16262950	16312957	Tibetan wild boar	scaffold20481.2	830590	832131	0	0	\	5	5
41	1	16709874	16759873	Tibetan wild boar	scaffold20142	1083953	1085185	0	4	\	0	4
42	1	17657849	17707848	Berkshire	scaffold35089.2	266032	266671	0	0	11	\	11
42	1	17657849	17707848	Berkshire	scaffold35089.2	266888	267518	0	1	15	\	16
42	1	17657849	17707848	Berkshire	scaffold35089.2	267912	268643	0	13	29	\	42
42	1	17657849	17707848	Berkshire	scaffold35089.2	268726	271294	0	53	58	\	111
42	1	17657849	17707848	Berkshire	scaffold35089.2	271470	272172	0	20	12	\	32
42	1	17657849	17707848	Berkshire	scaffold35089.2	279824	281617	66	24	50	\	140
42	1	17657849	17707848	Berkshire	scaffold35089.2	579378	580317	0	8	29	\	37
42	1	17657849	17707848	Berkshire	scaffold35089.2	580875	582239	0	29	46	\	75
42	1	17657849	17707848	Berkshire	scaffold35089.2	583647	584439	23	16	14	\	53
42	1	17657849	17707848	Bamei	scaffold48337	465626	466238	0	0	7	\	7
42	1	17657849	17707848	Bamei	scaffold48337	466477	467052	0	2	2	\	4
42	1	17657849	17707848	Bamei	scaffold48337	467659	468237	0	10	10	\	20
42	1	17657849	17707848	Bamei	scaffold48337	468337	470892	0	38	42	\	80
42	1	17657849	17707848	Bamei	scaffold48337	471067	471759	0	16	14	\	30
42	1	17657849	17707848	Bamei	scaffold48337	477364	478078	7	7	5	\	19
42	1	17657849	17707848	Bamei	scaffold48337	480553	482350	46	22	41	\	109
42	1	17657849	17707848	Bamei	scaffold48337	782232	783149	0	12	14	\	26
42	1	17657849	17707848	Bamei	scaffold48337	783931	785061	0	24	21	\	45
42	1	17657849	17707848	Bamei	scaffold48337	785913	786709	13	16	10	\	39
42	1	17657849	17707848	Hampshire	scaffold33311	1285139	1286885	24	24	22	\	70
42	1	17657849	17707848	Hampshire	scaffold33311	1294545	1295219	0	8	7	\	15
42	1	17657849	17707848	Hampshire	scaffold33311	1295411	1297979	0	52	56	\	108
42	1	17657849	17707848	Hampshire	scaffold33311	1298055	1298662	0	13	11	\	24
42	1	17657849	17707848	Hampshire	scaffold33311	983514	984326	16	13	15	\	44
42	1	17657849	17707848	Hampshire	scaffold33311	985074	986442	3	45	27	\	75
42	1	17657849	17707848	Hampshire	scaffold33311	987000	987795	0	16	21	\	37
42	1	17657849	17707848	Hampshire	scaffold362479	56	569	0	9	3	\	12
42	1	17657849	17707848	Hampshire	scaffold365633	1	580	0	5	10	\	15
42	1	17657849	17707848	Hampshire	scaffold369767	13	649	0	0	11	\	11
42	1	17657849	17707848	Hampshire	scaffold398514	340	2037	25	31	20	\	76
42	1	17657849	17707848	Jinhua	scaffold10315	458020	458609	0	1	8	\	9
42	1	17657849	17707848	Jinhua	scaffold10315	459161	459767	0	10	12	\	22
42	1	17657849	17707848	Jinhua	scaffold10315	459772	462398	0	72	65	\	137
42	1	17657849	17707848	Jinhua	scaffold10315	462582	463270	0	11	6	\	17
42	1	17657849	17707848	Jinhua	scaffold10315	470911	472732	61	39	44	\	144
42	1	17657849	17707848	Jinhua	scaffold10315	770400	771321	0	17	15	\	32
42	1	17657849	17707848	Jinhua	scaffold10315	772119	773285	0	31	30	\	61
42	1	17657849	17707848	Jinhua	scaffold10315	774109	774770	17	6	7	\	30
42	1	17657849	17707848	Landrace	scaffold21617.1	390970	392803	78	32	19	\	129
42	1	17657849	17707848	Landrace	scaffold21617.1	400713	401403	0	14	10	\	24
42	1	17657849	17707848	Landrace	scaffold21617.1	401590	404137	0	31	22	\	53
42	1	17657849	17707848	Landrace	scaffold21617.1	404228	404812	0	9	2	\	11
42	1	17657849	17707848	Landrace	scaffold21617.1	405380	405987	0	1	8	\	9
42	1	17657849	17707848	Landrace	scaffold21617.1	406221	406869	0	0	9	\	9
42	1	17657849	17707848	Landrace	scaffold21617.1	89730	90523	30	7	4	\	41
42	1	17657849	17707848	Landrace	scaffold21617.1	91300	92453	0	14	23	\	37
42	1	17657849	17707848	Landrace	scaffold21617.1	93227	94153	0	18	14	\	32
42	1	17657849	17707848	Large White	scaffold16465	1441623	1442422	25	12	10	8	55
42	1	17657849	17707848	Large White	scaffold16465	1443178	1444541	0	23	44	5	72
42	1	17657849	17707848	Large White	scaffold16465	1445122	1445891	0	11	17	8	36
42	1	17657849	17707848	Large White	scaffold16465	1447509	1448625	0	0	5	5	10
42	1	17657849	17707848	Large White	scaffold16465	1448750	1450018	0	0	0	4	4
42	1	17657849	17707848	Large White	scaffold16465	1450097	1451714	0	0	0	7	7
42	1	17657849	17707848	Large White	scaffold16465	1743132	1744918	64	26	51	0	141
42	1	17657849	17707848	Large White	scaffold16465	1752491	1753186	0	6	15	0	21
42	1	17657849	17707848	Large White	scaffold16465	1753362	1755926	0	51	47	12	110
42	1	17657849	17707848	Large White	scaffold16465	1756007	1756617	0	17	13	4	34
42	1	17657849	17707848	Large White	scaffold16465	1757156	1757770	0	2	9	7	18
42	1	17657849	17707848	Large White	scaffold16465	1757990	1758617	0	0	7	9	16
42	1	17657849	17707848	Meishan	scaffold5151.1	515769	516407	0	0	6	\	6
42	1	17657849	17707848	Meishan	scaffold5151.1	516636	517250	0	1	6	\	7
42	1	17657849	17707848	Meishan	scaffold5151.1	517801	518394	0	9	14	\	23
42	1	17657849	17707848	Meishan	scaffold5151.1	518409	521037	0	54	51	\	105
42	1	17657849	17707848	Meishan	scaffold5151.1	521213	521891	0	7	3	\	10
42	1	17657849	17707848	Meishan	scaffold5151.1	527762	528519	6	4	6	\	16
42	1	17657849	17707848	Meishan	scaffold5151.1	531312	533151	51	24	54	\	129
42	1	17657849	17707848	Meishan	scaffold5151.1	831930	832861	0	16	20	\	36
42	1	17657849	17707848	Meishan	scaffold5151.1	833624	834781	0	26	25	\	51
42	1	17657849	17707848	Meishan	scaffold5151.1	835566	836348	10	23	11	\	44
42	1	17657849	17707848	Meishan	scaffold617670	17	563	0	10	5	\	15
42	1	17657849	17707848	Piétrain	scaffold23745	456963	457575	0	0	7	\	7
42	1	17657849	17707848	Piétrain	scaffold23745	457798	458430	0	4	33	\	37
42	1	17657849	17707848	Piétrain	scaffold23745	458961	459553	0	12	15	\	27
42	1	17657849	17707848	Piétrain	scaffold23745	459639	462201	0	65	64	\	129
42	1	17657849	17707848	Piétrain	scaffold23745	462393	463086	0	22	18	\	40
42	1	17657849	17707848	Piétrain	scaffold23745	470746	472567	63	47	64	\	174
42	1	17657849	17707848	Piétrain	scaffold23745	767007	768124	0	0	4	\	4
42	1	17657849	17707848	Piétrain	scaffold23745	769546	770493	0	19	22	\	41
42	1	17657849	17707848	Piétrain	scaffold23745	771263	772432	0	33	25	\	58
42	1	17657849	17707848	Piétrain	scaffold23745	773216	774030	12	9	24	\	45
42	1	17657849	17707848	Rongchang	scaffold29953.4	4025398	4026186	15	3	4	0	22
42	1	17657849	17707848	Rongchang	scaffold29953.4	4026997	4028146	0	9	11	0	20
42	1	17657849	17707848	Rongchang	scaffold29953.4	4028949	4029842	0	6	13	2	21
42	1	17657849	17707848	Rongchang	scaffold29953.4	4031297	4032416	0	0	2	6	8
42	1	17657849	17707848	Rongchang	scaffold29953.4	4328050	4329861	50	15	14	0	79
42	1	17657849	17707848	Rongchang	scaffold29953.4	4337458	4338177	0	8	4	1	13
42	1	17657849	17707848	Rongchang	scaffold29953.4	4338322	4340884	0	26	41	3	70
42	1	17657849	17707848	Rongchang	scaffold29953.4	4340964	4341573	0	10	6	0	16
42	1	17657849	17707848	Rongchang	scaffold29953.4	4342100	4342719	0	3	9	4	16
42	1	17657849	17707848	Rongchang	scaffold29953.4	4342949	4343585	0	0	13	1	14
42	1	17657849	17707848	Tibetan wild boar	scaffold4636	285442	286046	0	10	\	0	10
42	1	17657849	17707848	Tibetan wild boar	scaffold4636	286097	288680	0	12	\	0	12
42	1	17657849	17707848	Tibetan wild boar	scaffold4636	288860	289559	0	15	\	0	15
42	1	17657849	17707848	Tibetan wild boar	scaffold4636	297833	299702	49	11	\	0	60
42	1	17657849	17707848	Tibetan wild boar	scaffold4636	606707	607827	0	0	\	6	6
42	1	17657849	17707848	Tibetan wild boar	scaffold4636	609285	610218	0	11	\	0	11
42	1	17657849	17707848	Tibetan wild boar	scaffold4636	610999	612138	0	4	\	0	4
43	1	18095706	18145705	Berkshire	scaffold32249	15494	16347	0	11	11	\	22
43	1	18095706	18145705	Bamei	scaffold48337	62285	63117	0	5	16	\	21
43	1	18095706	18145705	Hampshire	scaffold33311	1700243	1701038	0	7	17	\	24
43	1	18095706	18145705	Jinhua	scaffold10315	56025	56915	0	16	16	\	32
43	1	18095706	18145705	Landrace	scaffold21617.2	368900	369728	0	9	7	\	16
43	1	18095706	18145705	Large White	scaffold16465	2160023	2160869	0	12	14	4	30
43	1	18095706	18145705	Meishan	scaffold5151.1	113854	114690	0	2	9	\	11
43	1	18095706	18145705	Piétrain	scaffold23745	55342	56265	0	10	17	\	27
43	1	18095706	18145705	Rongchang	scaffold29953.4	4744438	4745291	0	7	8	0	15
43	1	18095706	18145705	Tibetan wild boar	scaffold18091	138113	138964	0	7	\	2	9
44	1	18229040	18279039	Berkshire	scaffold761.1	518102	518879	4	0	0	\	4
44	1	18229040	18279039	Bamei	scaffold36727	2616	3388	0	15	10	\	25
44	1	18229040	18279039	Bamei	scaffold36727	4487	5279	3	11	8	\	22
44	1	18229040	18279039	Jinhua	scaffold45367	122	645	4	1	0	\	5
44	1	18229040	18279039	Jinhua	scaffold45367	2041	2752	0	8	5	\	13
44	1	18229040	18279039	Large White	scaffold32627	2442	2945	4	5	6	4	19
44	1	18229040	18279039	Large White	scaffold32627	323	1048	0	5	4	9	18
44	1	18229040	18279039	Meishan	scaffold5151.1	2159	2964	5	8	11	\	24
44	1	18229040	18279039	Meishan	scaffold5151.1	291	1070	0	7	3	\	10
44	1	18229040	18279039	Piétrain	scaffold36907.3	1675763	1677893	0	4	0	\	4
44	1	18229040	18279039	Rongchang	scaffold23375	57257	58037	0	2	10	0	12
44	1	18229040	18279039	Rongchang	scaffold23375	59139	59922	14	4	0	0	18
45	1	18379771	18429770	Berkshire	scaffold36773	137026	137693	32	11	17	\	60
45	1	18379771	18429770	Bamei	scaffold12229	143770	144434	15	13	17	\	45
45	1	18379771	18429770	Hampshire	scaffold26863.2	578401	579069	24	21	13	\	58
45	1	18379771	18429770	Jinhua	scaffold4773	717392	718051	37	25	13	\	75
45	1	18379771	18429770	Landrace	scaffold31051.2	4205289	4205951	24	11	7	\	42
45	1	18379771	18429770	Large White	scaffold9223.1	141537	142190	27	13	15	4	59
45	1	18379771	18429770	Meishan	scaffold13853	143383	144033	17	18	6	\	41
45	1	18379771	18429770	Piétrain	scaffold11057	250016	251188	0	0	4	\	4
45	1	18379771	18429770	Piétrain	scaffold29633	143709	144373	15	17	15	\	47
45	1	18379771	18429770	Rongchang	scaffold13433.2	5725287	5725946	18	8	9	3	38
45	1	18379771	18429770	Tibetan wild boar	scaffold18260.1	190056	190717	11	8	\	1	20
48	1	19930531	19980530	Berkshire	scaffold2289.1	147288	150506	36	38	42	\	116
48	1	19930531	19980530	Berkshire	scaffold2289.1	83407	85368	0	0	6	\	6
48	1	19930531	19980530	Berkshire	scaffold2289.2	176	3391	20	34	29	\	83
48	1	19930531	19980530	Berkshire	scaffold2289.2	4181	6409	0	24	53	\	77
48	1	19930531	19980530	Bamei	scaffold12229	1705420	1708597	38	49	64	\	151
48	1	19930531	19980530	Bamei	scaffold12229	1709409	1711599	0	12	37	\	49
48	1	19930531	19980530	Hampshire	scaffold2001	147134	150292	56	92	93	\	241
48	1	19930531	19980530	Hampshire	scaffold2001	151056	153279	0	30	68	\	98
48	1	19930531	19980530	Hampshire	scaffold2001	83041	85013	0	0	11	\	11
48	1	19930531	19980530	Jinhua	scaffold23303	388754	391289	0	0	4	\	4
48	1	19930531	19980530	Jinhua	scaffold25689.2	59930	63114	54	64	88	\	206
48	1	19930531	19980530	Jinhua	scaffold25689.2	63881	66112	0	13	62	\	75
48	1	19930531	19980530	Landrace	scaffold31051.2	2630314	2632247	0	0	4	\	4
48	1	19930531	19980530	Landrace	scaffold31051.2	2632508	2634747	0	21	36	\	57
48	1	19930531	19980530	Landrace	scaffold31051.2	2635474	2638637	62	48	52	\	162
48	1	19930531	19980530	Landrace	scaffold31051.2	2700903	2702848	0	0	7	\	7
48	1	19930531	19980530	Large White	scaffold515136	1	1705	5	18	12	3	38
48	1	19930531	19980530	Large White	scaffold9223.1	1639025	1640986	0	0	14	0	14
48	1	19930531	19980530	Large White	scaffold9223.1	1702985	1706155	47	44	54	5	150
48	1	19930531	19980530	Large White	scaffold9223.1	1706931	1709160	0	18	53	11	82
48	1	19930531	19980530	Large White	scaffold9223.1	1709400	1711325	0	0	4	6	10
48	1	19930531	19980530	Meishan	scaffold48315	121639	123593	0	0	4	\	4
48	1	19930531	19980530	Meishan	scaffold48315	186615	189824	47	70	90	\	207
48	1	19930531	19980530	Meishan	scaffold48315	190607	192803	0	16	30	\	46
48	1	19930531	19980530	Piétrain	scaffold36621	684207	686421	0	29	47	\	76
48	1	19930531	19980530	Piétrain	scaffold36621	687212	690404	38	81	76	\	195
48	1	19930531	19980530	Piétrain	scaffold36621	752858	754833	0	0	4	\	4
48	1	19930531	19980530	Rongchang	scaffold13433.2	4156125	4158074	0	0	0	7	7
48	1	19930531	19980530	Rongchang	scaffold13433.2	4158308	4160516	0	16	28	9	53
48	1	19930531	19980530	Rongchang	scaffold13433.2	4161321	4164468	22	24	21	4	71
48	1	19930531	19980530	Rongchang	scaffold621152	113	3280	22	20	17	3	62
48	1	19930531	19980530	Tibetan wild boar	scaffold16639	1408591	1411799	39	32	\	10	81
48	1	19930531	19980530	Tibetan wild boar	scaffold16639	1413476	1415785	0	0	\	4	4
49	1	21087366	21137365	Jinhua	scaffold9813	1568009	1575006	0	1	3	\	4
49	1	21087366	21137365	Tibetan wild boar	scaffold20947	268246	268811	0	0	\	4	4
50	1	22224594	22274593	Berkshire	scaffold2289.2	2159405	2159914	22	14	25	\	61
50	1	22224594	22274593	Berkshire	scaffold2289.2	2160342	2161346	45	16	30	\	91
50	1	22224594	22274593	Berkshire	scaffold2289.2	2162186	2164902	0	42	65	\	107
50	1	22224594	22274593	Berkshire	scaffold2289.2	2165079	2166171	0	0	6	\	6
50	1	22224594	22274593	Bamei	scaffold43931	1224565	1227296	0	41	53	\	94
50	1	22224594	22274593	Bamei	scaffold43931	1228103	1229474	41	29	33	\	103
50	1	22224594	22274593	Bamei	scaffold43931	1229550	1230070	22	13	8	\	43
50	1	22224594	22274593	Hampshire	scaffold16761	2598780	2599862	0	0	7	\	7
50	1	22224594	22274593	Hampshire	scaffold16761	2600050	2602770	0	79	65	\	144
50	1	22224594	22274593	Hampshire	scaffold16761	2603602	2604969	35	32	25	\	92
50	1	22224594	22274593	Hampshire	scaffold16761	2605035	2605553	22	19	15	\	56
50	1	22224594	22274593	Jinhua	scaffold20669	1076101	1078209	5	0	0	\	5
50	1	22224594	22274593	Jinhua	scaffold45463	264493	265575	0	0	6	\	6
50	1	22224594	22274593	Jinhua	scaffold45463	265775	268501	0	67	74	\	141
50	1	22224594	22274593	Jinhua	scaffold45463	269324	270725	48	37	34	\	119
50	1	22224594	22274593	Landrace	scaffold31051.2	474417	475509	0	0	13	\	13
50	1	22224594	22274593	Landrace	scaffold31051.2	475691	478416	0	44	63	\	107
50	1	22224594	22274593	Landrace	scaffold31051.2	479261	480643	41	26	14	\	81
50	1	22224594	22274593	Landrace	scaffold31051.2	480689	481193	20	11	12	\	43
50	1	22224594	22274593	Large White	scaffold9223.4	394835	395339	34	10	12	0	56
50	1	22224594	22274593	Large White	scaffold9223.4	395763	396775	43	15	21	3	82
50	1	22224594	22274593	Large White	scaffold9223.4	397619	400331	0	53	68	15	136
50	1	22224594	22274593	Large White	scaffold9223.4	400520	401609	0	0	9	7	16
50	1	22224594	22274593	Large White	scaffold9223.4	401989	408919	0	0	0	11	11
50	1	22224594	22274593	Meishan	scaffold50989	372975	374068	0	0	5	\	5
50	1	22224594	22274593	Meishan	scaffold50989	374244	376956	0	55	82	\	137
50	1	22224594	22274593	Meishan	scaffold50989	377779	378815	26	25	25	\	76
50	1	22224594	22274593	Meishan	scaffold50989	379238	379753	12	17	11	\	40
50	1	22224594	22274593	Piétrain	scaffold35593.3	42173	43162	16	21	22	\	59
50	1	22224594	22274593	Piétrain	scaffold35593.3	44010	46721	0	70	94	\	164
50	1	22224594	22274593	Piétrain	scaffold35593.3	46904	47978	0	0	10	\	10
50	1	22224594	22274593	Rongchang	scaffold13433.2	1985015	1991950	0	0	1	5	6
50	1	22224594	22274593	Rongchang	scaffold13433.2	1992341	1993419	0	0	11	0	11
50	1	22224594	22274593	Rongchang	scaffold13433.2	1993618	1996329	0	43	43	10	96
50	1	22224594	22274593	Rongchang	scaffold13433.2	1997139	1998173	28	13	18	5	64
50	1	22224594	22274593	Rongchang	scaffold13433.2	1998592	1999093	10	6	4	0	20
50	1	22224594	22274593	Rongchang	scaffold563630	17	542	14	2	4	0	20
50	1	22224594	22274593	Tibetan wild boar	scaffold19341	1125867	1128603	0	17	\	11	28
50	1	22224594	22274593	Tibetan wild boar	scaffold19341	1128620	1129213	0	0	\	7	7
50	1	22224594	22274593	Tibetan wild boar	scaffold19341	1129356	1130673	22	14	\	9	45
50	1	22224594	22274593	Tibetan wild boar	scaffold19341	1130823	1131350	14	5	\	2	21
51	1	22441759	22491758	Berkshire	scaffold2289.2	2373381	2374889	82	31	33	\	146
51	1	22441759	22491758	Berkshire	scaffold2289.2	2375470	2376034	0	18	20	\	38
51	1	22441759	22491758	Bamei	scaffold43931	1016125	1016685	2	5	10	\	17
51	1	22441759	22491758	Bamei	scaffold43931	1017296	1018786	46	34	36	\	116
51	1	22441759	22491758	Hampshire	scaffold16761	2392845	2393422	0	7	15	\	22
51	1	22441759	22491758	Hampshire	scaffold16761	2393983	2395511	59	45	29	\	133
51	1	22441759	22491758	Jinhua	scaffold45463	54709	55282	0	12	13	\	25
51	1	22441759	22491758	Jinhua	scaffold45463	55874	57372	58	53	61	\	172
51	1	22441759	22491758	Landrace	scaffold31051.2	268340	268904	0	11	12	\	23
51	1	22441759	22491758	Landrace	scaffold31051.2	269427	270994	72	24	31	\	127
51	1	22441759	22491758	Large White	scaffold9223.4	604749	606389	57	36	40	9	142
51	1	22441759	22491758	Large White	scaffold9223.4	606837	607407	0	5	17	9	31
51	1	22441759	22491758	Meishan	scaffold50989	162760	163325	0	4	13	\	17
51	1	22441759	22491758	Meishan	scaffold50989	163912	165422	58	40	37	\	135
51	1	22441759	22491758	Piétrain	scaffold35593.3	251191	252836	30	49	55	\	134
51	1	22441759	22491758	Piétrain	scaffold35593.3	253283	253844	0	18	11	\	29
51	1	22441759	22491758	Rongchang	scaffold13433.2	1785473	1786037	0	6	5	4	15
51	1	22441759	22491758	Rongchang	scaffold13433.2	1786612	1788132	44	19	37	4	104
51	1	22441759	22491758	Tibetan wild boar	scaffold19341	912047	912621	0	8	\	0	8
51	1	22441759	22491758	Tibetan wild boar	scaffold19341	913213	914711	43	15	\	1	59
52	1	22704144	22754143	Berkshire	scaffold2289.2	2548479	2550947	100	52	74	\	226
52	1	22704144	22754143	Bamei	scaffold43931	844189	846658	47	53	45	\	145
52	1	22704144	22754143	Hampshire	scaffold16761	2223214	2225683	62	67	71	\	200
52	1	22704144	22754143	Jinhua	scaffold20611	148657	151131	69	56	63	\	188
52	1	22704144	22754143	Landrace	scaffold31051.2	97750	100224	77	45	51	\	173
52	1	22704144	22754143	Large White	scaffold9223.4	775196	777662	67	43	50	3	163
52	1	22704144	22754143	Meishan	scaffold51785	259415	261888	61	53	45	\	159
52	1	22704144	22754143	Piétrain	scaffold35593.3	421650	424110	38	62	63	\	163
52	1	22704144	22754143	Rongchang	scaffold13433.2	1616151	1618614	63	30	41	6	140
52	1	22704144	22754143	Tibetan wild boar	scaffold19341	737499	739983	35	27	\	1	63
54	1	23106820	23156819	Berkshire	scaffold2289.2	2811049	2811701	0	6	10	\	16
54	1	23106820	23156819	Berkshire	scaffold2289.2	2811931	2814425	0	0	15	\	15
54	1	23106820	23156819	Berkshire	scaffold2289.2	3073717	3074482	37	0	0	\	37
54	1	23106820	23156819	Berkshire	scaffold2289.2	3074730	3075334	12	0	0	\	12
54	1	23106820	23156819	Berkshire	scaffold2289.2	3076553	3077519	0	16	0	\	16
54	1	23106820	23156819	Berkshire	scaffold2289.2	3078783	3080622	0	0	6	\	6
54	1	23106820	23156819	Bamei	scaffold43931	318238	319196	0	16	1	\	17
54	1	23106820	23156819	Bamei	scaffold43931	319397	320346	0	3	2	\	5
54	1	23106820	23156819	Bamei	scaffold43931	320413	321002	7	0	0	\	7
54	1	23106820	23156819	Bamei	scaffold43931	321268	322400	24	0	0	\	24
54	1	23106820	23156819	Bamei	scaffold43931	582014	584523	0	1	9	\	10
54	1	23106820	23156819	Bamei	scaffold43931	584735	585362	0	1	5	\	6
54	1	23106820	23156819	Hampshire	scaffold16761	1697798	1698388	0	5	1	\	6
54	1	23106820	23156819	Hampshire	scaffold16761	1700706	1701833	21	0	0	\	21
54	1	23106820	23156819	Hampshire	scaffold16761	1959931	1962431	0	0	15	\	15
54	1	23106820	23156819	Hampshire	scaffold16761	1962661	1963313	0	7	7	\	14
54	1	23106820	23156819	Jinhua	scaffold32919	106020	106739	0	8	6	\	14
54	1	23106820	23156819	Jinhua	scaffold32919	368035	368793	33	0	0	\	33
54	1	23106820	23156819	Jinhua	scaffold32919	369054	369652	7	0	0	\	7
54	1	23106820	23156819	Jinhua	scaffold32919	370887	371755	0	25	0	\	25
54	1	23106820	23156819	Landrace	scaffold31051.1	24253	25121	0	7	3	\	10
54	1	23106820	23156819	Landrace	scaffold31051.1	26800	27382	7	0	0	\	7
54	1	23106820	23156819	Landrace	scaffold31051.1	27637	28774	34	0	0	\	34
54	1	23106820	23156819	Landrace	scaffold31051.1	287610	290120	0	0	11	\	11
54	1	23106820	23156819	Landrace	scaffold31051.1	290342	291073	0	8	4	\	12
54	1	23106820	23156819	Large White	scaffold514302	25	1746	0	0	5	0	5
54	1	23106820	23156819	Large White	scaffold9223.4	1038280	1038823	0	3	3	5	11
54	1	23106820	23156819	Large White	scaffold9223.4	1039036	1041541	0	2	15	23	40
54	1	23106820	23156819	Large White	scaffold9223.4	1301279	1302048	30	0	0	0	30
54	1	23106820	23156819	Large White	scaffold9223.4	1302296	1302897	7	0	0	0	7
54	1	23106820	23156819	Large White	scaffold9223.4	1304452	1305398	0	17	1	0	18
54	1	23106820	23156819	Meishan	scaffold37841	315006	315861	0	0	6	\	6
54	1	23106820	23156819	Meishan	scaffold37841	317183	318066	0	20	2	\	22
54	1	23106820	23156819	Meishan	scaffold37841	320322	321098	23	0	0	\	23
54	1	23106820	23156819	Meishan	scaffold37841	579789	582299	0	0	12	\	12
54	1	23106820	23156819	Meishan	scaffold37841	582509	583159	0	6	3	\	9
54	1	23106820	23156819	Meishan	scaffold600328	1	521	7	0	0	\	7
54	1	23106820	23156819	Piétrain	scaffold35593.3	686210	686828	0	5	10	\	15
54	1	23106820	23156819	Piétrain	scaffold35593.3	687134	689621	0	0	16	\	16
54	1	23106820	23156819	Piétrain	scaffold35593.3	947861	948987	22	0	0	\	22
54	1	23106820	23156819	Piétrain	scaffold35593.3	951062	952020	0	23	5	\	28
54	1	23106820	23156819	Rongchang	scaffold13433.2	1087683	1089542	0	0	12	0	12
54	1	23106820	23156819	Rongchang	scaffold13433.2	1092971	1093586	6	0	0	0	6
54	1	23106820	23156819	Rongchang	scaffold13433.2	1093838	1094947	25	0	2	0	27
54	1	23106820	23156819	Rongchang	scaffold13433.2	1351717	1353485	0	0	0	6	6
54	1	23106820	23156819	Rongchang	scaffold13433.2	1353533	1356025	0	2	7	10	19
54	1	23106820	23156819	Rongchang	scaffold13433.2	1356258	1356893	0	8	1	0	9
54	1	23106820	23156819	Tibetan wild boar	scaffold19341	204562	205547	0	5	\	0	5
54	1	23106820	23156819	Tibetan wild boar	scaffold19341	205601	206215	13	4	\	0	17
54	1	23106820	23156819	Tibetan wild boar	scaffold19341	206460	207591	32	0	\	0	32
55	1	23516192	23566191	Berkshire	scaffold10123	1882129	1883204	59	22	26	\	107
55	1	23516192	23566191	Berkshire	scaffold10123	1884075	1887955	0	43	96	\	139
55	1	23516192	23566191	Berkshire	scaffold2289.2	3353731	3355461	61	40	39	\	140
55	1	23516192	23566191	Berkshire	scaffold2289.2	3355706	3356853	0	25	26	\	51
55	1	23516192	23566191	Berkshire	scaffold2289.2	3356863	3359018	0	28	47	\	75
55	1	23516192	23566191	Bamei	scaffold18027	11314	15162	1	52	76	\	129
55	1	23516192	23566191	Bamei	scaffold18027	16064	17130	32	21	16	\	69
55	1	23516192	23566191	Bamei	scaffold43931	33419	35575	0	19	47	\	66
55	1	23516192	23566191	Bamei	scaffold43931	35594	36743	0	19	11	\	30
55	1	23516192	23566191	Bamei	scaffold43931	37139	38685	28	22	30	\	80
55	1	23516192	23566191	Hampshire	scaffold16761	1357339	1358412	52	32	14	\	98
55	1	23516192	23566191	Hampshire	scaffold16761	1359288	1359872	0	7	12	\	19
55	1	23516192	23566191	Hampshire	scaffold16761	1359883	1363169	0	76	70	\	146
55	1	23516192	23566191	Hampshire	scaffold16761	1412860	1413686	0	0	7	\	7
55	1	23516192	23566191	Hampshire	scaffold16761	1414320	1416481	0	49	80	\	129
55	1	23516192	23566191	Hampshire	scaffold16761	1416487	1417641	1	21	27	\	49
55	1	23516192	23566191	Hampshire	scaffold16761	1418064	1419602	36	57	29	\	122
55	1	23516192	23566191	Jinhua	scaffold32919	649628	651147	37	41	46	\	124
55	1	23516192	23566191	Jinhua	scaffold32919	651613	652759	0	11	15	\	26
55	1	23516192	23566191	Jinhua	scaffold32919	652772	654917	0	29	32	\	61
55	1	23516192	23566191	Jinhua	scaffold34647.1	11784	15648	1	72	81	\	154
55	1	23516192	23566191	Jinhua	scaffold34647.1	16531	17602	37	34	29	\	100
55	1	23516192	23566191	Jinhua	scaffold43381	1136412	1138974	4	0	0	\	4
55	1	23516192	23566191	Landrace	scaffold10955	11718	14978	0	28	32	\	60
55	1	23516192	23566191	Landrace	scaffold10955	15038	15566	0	10	5	\	15
55	1	23516192	23566191	Landrace	scaffold10955	16460	17523	44	24	20	\	88
55	1	23516192	23566191	Landrace	scaffold12229	254110	255650	43	38	22	\	103
55	1	23516192	23566191	Landrace	scaffold12229	256089	257225	0	18	20	\	38
55	1	23516192	23566191	Landrace	scaffold12229	257238	259385	0	33	37	\	70
55	1	23516192	23566191	Landrace	scaffold467891	24	1534	0	1	15	\	16
55	1	23516192	23566191	Large White	scaffold12057	1115371	1116275	0	0	4	0	4
55	1	23516192	23566191	Large White	scaffold12567.1	11652	15527	0	48	78	22	148
55	1	23516192	23566191	Large White	scaffold12567.1	16419	17484	31	19	25	10	85
55	1	23516192	23566191	Large White	scaffold12567.1	6892	11472	0	0	0	25	25
55	1	23516192	23566191	Large White	scaffold9223.4	1583868	1585408	42	36	34	13	125
55	1	23516192	23566191	Large White	scaffold9223.4	1585834	1586987	0	11	17	6	34
55	1	23516192	23566191	Large White	scaffold9223.4	1586993	1589139	0	26	24	22	72
55	1	23516192	23566191	Meishan	scaffold2617	11425	15265	0	54	71	\	125
55	1	23516192	23566191	Meishan	scaffold2617	16166	17239	32	33	30	\	95
55	1	23516192	23566191	Meishan	scaffold37841	33677	36976	0	71	64	\	135
55	1	23516192	23566191	Meishan	scaffold37841	37434	38963	27	14	16	\	57
55	1	23516192	23566191	Meishan	scaffold676606	510	1545	12	11	13	\	36
55	1	23516192	23566191	Piétrain	scaffold11969.1	11476	15353	0	95	93	\	188
55	1	23516192	23566191	Piétrain	scaffold11969.1	16260	17299	21	31	27	\	79
55	1	23516192	23566191	Piétrain	scaffold35593.3	1230210	1231751	37	42	31	\	110
55	1	23516192	23566191	Piétrain	scaffold35593.3	1232177	1233326	0	25	36	\	61
55	1	23516192	23566191	Piétrain	scaffold35593.3	1233345	1235495	0	75	59	\	134
55	1	23516192	23566191	Piétrain	scaffold35593.3	1236108	1236954	0	0	7	\	7
55	1	23516192	23566191	Rongchang	scaffold13433.2	750650	751715	40	15	11	6	72
55	1	23516192	23566191	Rongchang	scaffold13433.2	752618	753195	0	6	9	3	18
55	1	23516192	23566191	Rongchang	scaffold13433.2	753201	756460	0	21	56	8	85
55	1	23516192	23566191	Rongchang	scaffold13433.2	756593	761444	0	0	3	8	11
55	1	23516192	23566191	Rongchang	scaffold13433.2	807128	809283	0	24	30	1	55
55	1	23516192	23566191	Rongchang	scaffold13433.2	809291	810426	0	13	14	2	29
55	1	23516192	23566191	Rongchang	scaffold13433.2	810878	812408	32	16	23	9	80
55	1	23516192	23566191	Tibetan wild boar	scaffold17006	11122	14991	0	9	\	2	11
55	1	23516192	23566191	Tibetan wild boar	scaffold17006	15858	16932	15	4	\	1	20
55	1	23516192	23566191	Tibetan wild boar	scaffold17006	6368	10998	0	0	\	6	6
55	1	23516192	23566191	Tibetan wild boar	scaffold20207	93160	94949	41	12	\	11	64
55	1	23516192	23566191	Tibetan wild boar	scaffold20207	95182	98492	0	6	\	4	10
55	1	23516192	23566191	Tibetan wild boar	scaffold20207	99096	99954	0	0	\	8	8
57	1	25217287	25267286	Berkshire	scaffold10123	438723	440118	0	24	30	\	54
57	1	25217287	25267286	Berkshire	scaffold10123	440149	440688	0	9	22	\	31
57	1	25217287	25267286	Berkshire	scaffold10123	440904	444010	79	70	111	\	260
57	1	25217287	25267286	Bamei	scaffold18027	1456287	1459382	34	69	75	\	178
57	1	25217287	25267286	Bamei	scaffold18027	1459611	1460133	0	8	13	\	21
57	1	25217287	25267286	Bamei	scaffold18027	1460185	1461565	0	20	25	\	45
57	1	25217287	25267286	Hampshire	scaffold22091	439661	440949	0	16	16	\	32
57	1	25217287	25267286	Hampshire	scaffold22091	441086	441622	0	20	14	\	34
57	1	25217287	25267286	Hampshire	scaffold22091	441847	444916	74	93	57	\	224
57	1	25217287	25267286	Hampshire	scaffold394210	146	1410	0	12	14	\	26
57	1	25217287	25267286	Jinhua	scaffold34647.2	1076072	1079191	88	82	84	\	254
57	1	25217287	25267286	Jinhua	scaffold34647.2	1079410	1079930	0	11	6	\	17
57	1	25217287	25267286	Jinhua	scaffold34647.2	1079975	1081364	0	24	36	\	60
57	1	25217287	25267286	Landrace	scaffold10955	1457287	1460403	99	61	50	\	210
57	1	25217287	25267286	Landrace	scaffold10955	1460639	1461155	0	11	17	\	28
57	1	25217287	25267286	Landrace	scaffold10955	1461201	1462596	0	26	28	\	54
57	1	25217287	25267286	Large White	scaffold12567.3	1168556	1171662	68	62	92	9	231
57	1	25217287	25267286	Large White	scaffold12567.3	1171910	1172428	0	8	12	3	23
57	1	25217287	25267286	Large White	scaffold12567.3	1172475	1173862	0	23	28	9	60
57	1	25217287	25267286	Meishan	scaffold2617	1456653	1459753	72	45	57	\	174
57	1	25217287	25267286	Meishan	scaffold2617	1459969	1460504	0	9	7	\	16
57	1	25217287	25267286	Meishan	scaffold2617	1460537	1461932	0	15	24	\	39
57	1	25217287	25267286	Piétrain	scaffold11969.2	279130	282234	54	100	60	\	214
57	1	25217287	25267286	Piétrain	scaffold11969.2	282456	282981	0	10	19	\	29
57	1	25217287	25267286	Piétrain	scaffold11969.2	283015	284413	0	28	29	\	57
57	1	25217287	25267286	Rongchang	scaffold13433.1	435863	437256	0	18	15	4	37
57	1	25217287	25267286	Rongchang	scaffold13433.1	437300	437820	0	8	8	0	16
57	1	25217287	25267286	Rongchang	scaffold13433.1	438042	441154	66	56	42	0	164
57	1	25217287	25267286	Tibetan wild boar	scaffold21576	454516	457640	43	17	\	0	60
58	1	25415084	25465083	Berkshire	scaffold10123	432882	438581	71	88	124	\	283
58	1	25415084	25465083	Bamei	scaffold18027	1461695	1467425	36	85	154	\	275
58	1	25415084	25465083	Hampshire	scaffold22091	433832	439628	42	130	91	\	263
58	1	25415084	25465083	Hampshire	scaffold392695	411	1259	0	1	7	\	8
58	1	25415084	25465083	Jinhua	scaffold34647.2	1081446	1087216	45	105	125	\	275
58	1	25415084	25465083	Landrace	scaffold10955	1462849	1468943	74	89	122	\	285
58	1	25415084	25465083	Large White	scaffold12567.3	1174007	1179714	55	80	149	29	313
58	1	25415084	25465083	Meishan	scaffold2617	1462078	1468206	62	93	100	\	255
58	1	25415084	25465083	Piétrain	scaffold11969.2	284574	290266	40	146	141	\	327
58	1	25415084	25465083	Rongchang	scaffold13433.1	430006	435827	62	62	83	26	233
58	1	25415084	25465083	Tibetan wild boar	scaffold21576	446320	448124	43	15	\	2	60
58	1	25415084	25465083	Tibetan wild boar	scaffold21576	448136	452316	0	12	\	5	17
58	1	25415084	25465083	Tibetan wild boar	scaffold21576	452354	453747	0	0	\	8	8
59	1	25613392	25663391	Berkshire	scaffold10123	107845	109345	71	27	39	\	137
59	1	25613392	25663391	Bamei	scaffold18027	1789572	1791062	34	27	34	\	95
59	1	25613392	25663391	Hampshire	scaffold22091	107005	108541	48	34	44	\	126
59	1	25613392	25663391	Jinhua	scaffold34647.2	1411806	1413319	79	35	29	\	143
59	1	25613392	25663391	Landrace	scaffold10955	1795611	1797135	64	30	30	\	124
59	1	25613392	25663391	Large White	scaffold12567.3	1503544	1505058	55	21	39	3	118
59	1	25613392	25663391	Meishan	scaffold2617	1793067	1794612	61	31	23	\	115
59	1	25613392	25663391	Piétrain	scaffold11969.2	614483	616015	47	29	32	\	108
59	1	25613392	25663391	Rongchang	scaffold13433.1	107098	108608	34	11	23	9	77
59	1	25613392	25663391	Tibetan wild boar	scaffold21576	109119	110654	49	8	\	0	57
60	1	25864615	25914614	Jinhua	scaffold43465	195972	196477	20	12	12	\	44
60	1	25864615	25914614	Landrace	scaffold15723	188695	189197	24	7	9	\	40
60	1	25864615	25914614	Piétrain	scaffold7537	191178	191678	8	6	15	\	29
60	1	25864615	25914614	Rongchang	scaffold39989	189339	189839	10	7	3	2	22
61	1	26026649	26076648	Jinhua	scaffold39355	1539258	1540907	0	0	4	\	4
62	1	26874737	26924736	Berkshire	scaffold24717.1	290909	293096	0	0	13	\	13
62	1	26874737	26924736	Berkshire	scaffold24717.1	331648	332314	45	18	16	\	79
62	1	26874737	26924736	Berkshire	scaffold24717.1	340285	342072	0	60	47	\	107
62	1	26874737	26924736	Bamei	scaffold50851	374735	376505	0	40	36	\	76
62	1	26874737	26924736	Bamei	scaffold50851	384479	385147	14	4	10	\	28
62	1	26874737	26924736	Bamei	scaffold50851	423766	425971	0	0	7	\	7
62	1	26874737	26924736	Bamei	scaffold50851	435503	436660	0	0	5	\	5
62	1	26874737	26924736	Hampshire	scaffold34159	373708	375479	0	38	56	\	94
62	1	26874737	26924736	Hampshire	scaffold34159	383463	384128	23	26	25	\	74
62	1	26874737	26924736	Hampshire	scaffold34159	422587	424759	0	0	9	\	9
62	1	26874737	26924736	Jinhua	scaffold15053.1	288717	289858	0	0	5	\	5
62	1	26874737	26924736	Jinhua	scaffold15053.1	299352	301549	0	0	10	\	10
62	1	26874737	26924736	Jinhua	scaffold15053.1	340078	340743	29	10	33	\	72
62	1	26874737	26924736	Jinhua	scaffold15053.1	348694	350464	0	48	38	\	86
62	1	26874737	26924736	Landrace	scaffold37231	375214	377001	0	42	29	\	71
62	1	26874737	26924736	Landrace	scaffold37231	384965	385637	27	14	10	\	51
62	1	26874737	26924736	Landrace	scaffold37231	424069	426250	0	0	15	\	15
62	1	26874737	26924736	Large White	scaffold26505.3	3482594	3484375	0	30	55	7	92
62	1	26874737	26924736	Large White	scaffold26505.3	3492346	3492999	34	12	16	0	62
62	1	26874737	26924736	Large White	scaffold26505.3	3531462	3533643	0	0	19	7	26
62	1	26874737	26924736	Meishan	scaffold26611.2	212013	214207	0	0	5	\	5
62	1	26874737	26924736	Meishan	scaffold26611.2	253022	253681	29	13	15	\	57
62	1	26874737	26924736	Meishan	scaffold26611.2	261666	263439	0	43	37	\	80
62	1	26874737	26924736	Piétrain	scaffold14793.3	140102	141885	0	53	36	\	89
62	1	26874737	26924736	Piétrain	scaffold14793.3	149857	150531	14	20	24	\	58
62	1	26874737	26924736	Piétrain	scaffold14793.3	189132	191326	0	0	18	\	18
62	1	26874737	26924736	Rongchang	scaffold43527.3	1124002	1125795	0	19	23	0	42
62	1	26874737	26924736	Rongchang	scaffold43527.3	1133755	1134433	27	3	9	0	39
62	1	26874737	26924736	Rongchang	scaffold43527.3	1173008	1175200	0	0	15	0	15
62	1	26874737	26924736	Tibetan wild boar	scaffold17155.1	346120	346806	22	1	\	0	23
64	1	27781630	27831629	Jinhua	scaffold2553.2	358258	359056	0	0	10	\	10
65	1	27946346	27996345	Berkshire	scaffold37123.2	238595	239563	33	20	33	\	86
65	1	27946346	27996345	Bamei	scaffold53315	400431	401365	26	24	13	\	63
65	1	27946346	27996345	Hampshire	scaffold1723.3	454827	455796	25	28	17	\	70
65	1	27946346	27996345	Jinhua	scaffold31697	1501268	1507170	2	1	1	\	4
65	1	27946346	27996345	Jinhua	scaffold45579	109430	110393	41	27	34	\	102
65	1	27946346	27996345	Landrace	scaffold20863	277426	278406	40	15	29	\	84
65	1	27946346	27996345	Large White	scaffold26505.3	2697461	2698417	33	23	34	3	93
65	1	27946346	27996345	Meishan	scaffold49147.3	336827	337782	34	19	21	\	74
65	1	27946346	27996345	Piétrain	scaffold35745.2	12906	13833	32	36	33	\	101
65	1	27946346	27996345	Rongchang	scaffold43527.3	174730	175296	0	2	5	8	15
65	1	27946346	27996345	Rongchang	scaffold43527.3	181495	182214	0	0	0	4	4
65	1	27946346	27996345	Rongchang	scaffold43527.3	337400	338335	21	9	15	1	46
65	1	27946346	27996345	Tibetan wild boar	scaffold18532	159124	160081	9	0	\	0	9
67	1	29413931	29463930	Berkshire	scaffold36543.3	610768	611716	0	0	14	\	14
67	1	29413931	29463930	Bamei	scaffold53315	1932200	1933184	0	0	7	\	7
67	1	29413931	29463930	Hampshire	scaffold1723.1	4870327	4871267	0	0	14	\	14
67	1	29413931	29463930	Jinhua	scaffold33967	820118	821065	0	0	9	\	9
67	1	29413931	29463930	Landrace	scaffold39213	1039962	1040889	0	0	4	\	4
67	1	29413931	29463930	Large White	scaffold26505.3	1161366	1162316	0	0	6	2	8
67	1	29413931	29463930	Meishan	scaffold18781	546554	547530	0	0	4	\	4
67	1	29413931	29463930	Piétrain	scaffold35745.1	57703	58630	0	0	11	\	11
67	1	29413931	29463930	Rongchang	scaffold24301	65006	65949	0	0	4	0	4
67	1	29413931	29463930	Tibetan wild boar	scaffold19818	996838	997796	0	0	\	4	4
68	1	29951301	30001300	Berkshire	scaffold36543.3	206401	208171	88	18	25	\	131
68	1	29951301	30001300	Bamei	scaffold53315	2337957	2339407	43	25	20	\	88
68	1	29951301	30001300	Hampshire	scaffold1723.1	4465893	4467409	55	28	19	\	102
68	1	29951301	30001300	Jinhua	scaffold33967	1225548	1226997	50	20	20	\	90
68	1	29951301	30001300	Landrace	scaffold39213	632085	633582	77	15	13	\	105
68	1	29951301	30001300	Large White	scaffold26505.3	752891	754659	46	21	21	15	103
68	1	29951301	30001300	Meishan	scaffold42409.2	446160	447609	34	25	19	\	78
68	1	29951301	30001300	Piétrain	scaffold24939	341098	342604	54	23	15	\	92
68	1	29951301	30001300	Rongchang	scaffold24301	470628	472381	58	14	13	0	85
68	1	29951301	30001300	Rongchang	scaffold569303	23	608	0	0	0	5	5
68	1	29951301	30001300	Tibetan wild boar	scaffold21555	1008018	1009805	38	13	\	0	51
69	1	30568748	30618747	Berkshire	scaffold36543.2	927000	928070	42	12	28	\	82
69	1	30568748	30618747	Bamei	scaffold40709	625502	626516	25	17	15	\	57
69	1	30568748	30618747	Hampshire	scaffold1723.1	3922876	3923926	16	21	24	\	61
69	1	30568748	30618747	Jinhua	scaffold33967	1771934	1772969	36	22	20	\	78
69	1	30568748	30618747	Landrace	scaffold39213	88541	89573	55	15	13	\	83
69	1	30568748	30618747	Large White	scaffold26505.3	210208	211271	46	15	19	0	80
69	1	30568748	30618747	Meishan	scaffold42409.1	627407	628431	39	22	7	\	68
69	1	30568748	30618747	Piétrain	scaffold24939	883451	884466	23	22	15	\	60
69	1	30568748	30618747	Rongchang	scaffold38695	335746	336781	35	6	11	1	53
69	1	30568748	30618747	Tibetan wild boar	scaffold21555	448971	450016	22	4	\	0	26
70	1	31138895	31188894	Berkshire	scaffold36543.2	327949	329441	0	28	42	\	70
70	1	31138895	31188894	Berkshire	scaffold36543.2	329678	332478	81	76	71	\	228
70	1	31138895	31188894	Bamei	scaffold40709	30553	32049	0	32	35	\	67
70	1	31138895	31188894	Bamei	scaffold40709	32299	35081	83	53	56	\	192
70	1	31138895	31188894	Hampshire	scaffold1723.1	3324088	3326013	0	11	26	\	37
70	1	31138895	31188894	Hampshire	scaffold1723.1	3326160	3327653	0	44	45	\	89
70	1	31138895	31188894	Hampshire	scaffold1723.1	3327901	3330702	87	69	57	\	213
70	1	31138895	31188894	Jinhua	scaffold33967	2364231	2367029	87	68	58	\	213
70	1	31138895	31188894	Jinhua	scaffold33967	2367272	2368761	0	53	31	\	84
70	1	31138895	31188894	Landrace	scaffold19279.1	497224	500021	65	48	41	\	154
70	1	31138895	31188894	Landrace	scaffold19279.1	500295	501782	0	32	44	\	76
70	1	31138895	31188894	Large White	scaffold26505.1	4593223	4594713	0	36	34	5	75
70	1	31138895	31188894	Large White	scaffold26505.1	4594962	4597759	85	65	56	4	210
70	1	31138895	31188894	Meishan	scaffold42409.1	32315	33825	0	46	36	\	82
70	1	31138895	31188894	Meishan	scaffold42409.1	34048	36854	69	68	66	\	203
70	1	31138895	31188894	Piétrain	scaffold24939	1479074	1481865	53	85	70	\	208
70	1	31138895	31188894	Piétrain	scaffold24939	1482110	1483603	0	41	44	\	85
70	1	31138895	31188894	Rongchang	scaffold38695	929640	932440	81	35	34	11	161
70	1	31138895	31188894	Rongchang	scaffold38695	932688	934178	0	33	12	3	48
70	1	31138895	31188894	Tibetan wild boar	scaffold18427	32371	33886	0	15	\	0	15
70	1	31138895	31188894	Tibetan wild boar	scaffold18427	34115	36913	50	24	\	1	75
71	1	31309776	31359775	Berkshire	scaffold36543.2	258830	260665	93	12	2	\	107
71	1	31309776	31359775	Berkshire	scaffold36543.2	321870	323051	0	2	15	\	17
71	1	31309776	31359775	Berkshire	scaffold36543.2	323434	325070	0	32	63	\	95
71	1	31309776	31359775	Berkshire	scaffold36543.2	325826	327802	0	16	35	\	51
71	1	31309776	31359775	Bamei	scaffold40709	24788	25975	0	1	11	\	12
71	1	31309776	31359775	Bamei	scaffold40709	26339	27691	0	25	28	\	53
71	1	31309776	31359775	Bamei	scaffold40709	28442	30408	0	22	52	\	74
71	1	31309776	31359775	Hampshire	scaffold1723.1	3320065	3321273	0	0	4	\	4
71	1	31309776	31359775	Hampshire	scaffold1723.1	3321622	3323253	0	34	42	\	76
71	1	31309776	31359775	Hampshire	scaffold396112	39	1629	0	18	16	\	34
71	1	31309776	31359775	Jinhua	scaffold33967	2368912	2370874	0	14	26	\	40
71	1	31309776	31359775	Jinhua	scaffold33967	2371626	2372982	0	27	38	\	65
71	1	31309776	31359775	Jinhua	scaffold33967	2373319	2374542	0	1	15	\	16
71	1	31309776	31359775	Jinhua	scaffold33967	2436687	2438536	74	6	0	\	80
71	1	31309776	31359775	Landrace	scaffold19279.1	501931	503890	0	13	23	\	36
71	1	31309776	31359775	Landrace	scaffold19279.1	504649	506000	0	15	23	\	38
71	1	31309776	31359775	Large White	scaffold26505.1	4587150	4588327	0	3	23	9	35
71	1	31309776	31359775	Large White	scaffold26505.1	4588720	4590347	0	45	30	6	81
71	1	31309776	31359775	Large White	scaffold26505.1	4591109	4593080	0	12	31	8	51
71	1	31309776	31359775	Meishan	scaffold42409.1	26493	27719	0	3	3	\	6
71	1	31309776	31359775	Meishan	scaffold42409.1	28069	29422	0	22	45	\	67
71	1	31309776	31359775	Meishan	scaffold42409.1	30201	32179	0	10	44	\	54
71	1	31309776	31359775	Piétrain	scaffold24939	1483740	1485688	0	24	44	\	68
71	1	31309776	31359775	Piétrain	scaffold24939	1486501	1487847	0	32	18	\	50
71	1	31309776	31359775	Piétrain	scaffold24939	1488210	1489419	0	0	4	\	4
71	1	31309776	31359775	Piétrain	scaffold24939	1546980	1547499	0	4	8	\	12
71	1	31309776	31359775	Rongchang	scaffold38695	934320	936281	0	16	21	4	41
71	1	31309776	31359775	Rongchang	scaffold38695	937041	938377	0	17	16	7	40
71	1	31309776	31359775	Tibetan wild boar	scaffold18427	26505	27738	0	4	\	3	7
71	1	31309776	31359775	Tibetan wild boar	scaffold18427	27872	29497	0	12	\	7	19
71	1	31309776	31359775	Tibetan wild boar	scaffold18427	30255	32231	0	4	\	12	16
71	1	31309776	31359775	Tibetan wild boar	scaffold19207	30100	31954	41	9	\	1	51
71	1	31309776	31359775	Tibetan wild boar	scaffold5188.2	8849	10692	0	0	\	4	4
72	1	31553634	31603633	Berkshire	scaffold36543.1	261466	263399	0	31	38	\	69
72	1	31553634	31603633	Berkshire	scaffold36543.1	263622	265706	58	39	52	\	149
72	1	31553634	31603633	Bamei	scaffold10277	29337	31195	0	36	28	\	64
72	1	31553634	31603633	Bamei	scaffold10277	460065	462131	58	38	43	\	139
72	1	31553634	31603633	Bamei	scaffold10277	462187	464335	0	30	40	\	70
72	1	31553634	31603633	Hampshire	scaffold1723.1	2824715	2826694	0	48	39	\	87
72	1	31553634	31603633	Hampshire	scaffold1723.1	2826947	2828764	42	47	42	\	131
72	1	31553634	31603633	Hampshire	scaffold1723.1	3256238	3258076	0	45	38	\	83
72	1	31553634	31603633	Jinhua	scaffold33967	2865721	2867801	63	53	56	\	172
72	1	31553634	31603633	Jinhua	scaffold33967	2868016	2869991	0	32	47	\	79
72	1	31553634	31603633	Landrace	scaffold19279.1	1000001	1002159	0	38	37	\	75
72	1	31553634	31603633	Landrace	scaffold19279.1	569608	571461	0	25	58	\	83
72	1	31553634	31603633	Landrace	scaffold19279.1	997867	999948	71	42	34	\	147
72	1	31553634	31603633	Large White	scaffold26505.1	4093039	4095006	0	25	33	15	73
72	1	31553634	31603633	Large White	scaffold26505.1	4095239	4097076	56	32	56	17	161
72	1	31553634	31603633	Large White	scaffold26505.1	4523987	4525840	0	37	54	13	104
72	1	31553634	31603633	Meishan	scaffold15369	142679	144511	0	29	40	\	69
72	1	31553634	31603633	Meishan	scaffold7171	282309	284406	54	44	52	\	150
72	1	31553634	31603633	Meishan	scaffold7171	284465	286554	0	40	39	\	79
72	1	31553634	31603633	Piétrain	scaffold23295	2836754	2838912	0	54	59	\	113
72	1	31553634	31603633	Piétrain	scaffold23295	2838959	2841035	39	59	70	\	168
72	1	31553634	31603633	Piétrain	scaffold24939	1549569	1551376	0	39	33	\	72
72	1	31553634	31603633	Rongchang	scaffold38695	1427475	1429542	59	28	40	16	143
72	1	31553634	31603633	Rongchang	scaffold38695	1429631	1431732	0	16	23	1	40
72	1	31553634	31603633	Rongchang	scaffold38695	998616	1000466	0	25	21	8	54
72	1	31553634	31603633	Tibetan wild boar	scaffold19207	467842	469938	45	2	\	3	50
72	1	31553634	31603633	Tibetan wild boar	scaffold19207	469974	472144	0	14	\	0	14
74	1	33150867	33200866	Berkshire	scaffold36595	1419430	1421339	154	79	82	\	315
74	1	33150867	33200866	Bamei	scaffold53047	1144454	1146341	78	46	79	\	203
74	1	33150867	33200866	Hampshire	scaffold13743.2	933049	935365	0	3	1	\	4
74	1	33150867	33200866	Hampshire	scaffold1723.1	1421884	1423805	108	106	64	\	278
74	1	33150867	33200866	Jinhua	scaffold33967	4273551	4275454	116	73	73	\	262
74	1	33150867	33200866	Landrace	scaffold19279.3	1370483	1372388	126	61	68	\	255
74	1	33150867	33200866	Large White	scaffold26505.1	2687206	2689113	126	75	99	8	308
74	1	33150867	33200866	Meishan	scaffold40731	1215610	1217528	95	72	115	\	282
74	1	33150867	33200866	Piétrain	scaffold23295	1425565	1427471	75	108	92	\	275
74	1	33150867	33200866	Rongchang	scaffold38695	2837221	2839117	77	61	43	7	188
74	1	33150867	33200866	Tibetan wild boar	scaffold19207	1903981	1905910	87	24	\	6	117
76	1	35508607	35558606	Berkshire	scaffold35833	758919	759662	28	16	17	\	61
76	1	35508607	35558606	Berkshire	scaffold35833	760298	762081	32	38	45	\	115
76	1	35508607	35558606	Bamei	scaffold53047	3409539	3411340	16	36	51	\	103
76	1	35508607	35558606	Bamei	scaffold53047	3411966	3412717	18	13	15	\	46
76	1	35508607	35558606	Hampshire	scaffold6529	1123609	1124357	15	24	28	\	67
76	1	35508607	35558606	Hampshire	scaffold6529	1124990	1126776	9	53	42	\	104
76	1	35508607	35558606	Jinhua	scaffold16931.1	563853	564647	43	31	15	\	89
76	1	35508607	35558606	Jinhua	scaffold16931.1	565253	567039	18	46	35	\	99
76	1	35508607	35558606	Landrace	scaffold37249	724831	726637	27	35	33	\	95
76	1	35508607	35558606	Landrace	scaffold37249	727253	728013	23	19	14	\	56
76	1	35508607	35558606	Large White	scaffold26505.1	419344	420102	42	16	21	6	85
76	1	35508607	35558606	Large White	scaffold26505.1	420724	422513	14	30	31	1	76
76	1	35508607	35558606	Meishan	scaffold4195	41179	41925	18	18	14	\	50
76	1	35508607	35558606	Meishan	scaffold4195	42560	44359	7	30	44	\	81
76	1	35508607	35558606	Piétrain	scaffold36263.1	574318	576101	8	38	36	\	82
76	1	35508607	35558606	Piétrain	scaffold36263.1	576752	577493	13	18	21	\	52
76	1	35508607	35558606	Rongchang	scaffold53355	805160	806941	19	23	32	2	76
76	1	35508607	35558606	Rongchang	scaffold53355	807560	808338	30	12	10	0	52
76	1	35508607	35558606	Tibetan wild boar	scaffold19591	124983	126779	5	4	\	0	9
76	1	35508607	35558606	Tibetan wild boar	scaffold19591	127404	128164	19	0	\	1	20
78	1	37049410	37099409	Berkshire	scaffold18029.2	446341	450597	0	53	101	\	154
78	1	37049410	37099409	Berkshire	scaffold18029.2	450806	451413	0	0	15	\	15
78	1	37049410	37099409	Bamei	scaffold53047	5083381	5087632	0	50	79	\	129
78	1	37049410	37099409	Bamei	scaffold580502	14	619	0	0	4	\	4
78	1	37049410	37099409	Hampshire	scaffold25811.1	547071	551320	0	88	99	\	187
78	1	37049410	37099409	Hampshire	scaffold25811.1	551542	552152	0	0	10	\	10
78	1	37049410	37099409	Jinhua	scaffold39043	408428	409028	0	0	10	\	10
78	1	37049410	37099409	Jinhua	scaffold39043	409240	413500	0	78	102	\	180
78	1	37049410	37099409	Landrace	scaffold36705.1	547486	551730	0	68	69	\	137
78	1	37049410	37099409	Landrace	scaffold36705.1	551936	552549	0	0	9	\	9
78	1	37049410	37099409	Large White	scaffold8423	1249690	1253947	0	52	101	27	180
78	1	37049410	37099409	Large White	scaffold8423	1254159	1254763	0	0	12	4	16
78	1	37049410	37099409	Meishan	scaffold2983	1288746	1293006	0	55	96	\	151
78	1	37049410	37099409	Meishan	scaffold2983	1293210	1293818	0	0	10	\	10
78	1	37049410	37099409	Piétrain	scaffold36263.2	584535	588786	0	81	96	\	177
78	1	37049410	37099409	Piétrain	scaffold36263.2	588996	589634	0	0	19	\	19
78	1	37049410	37099409	Rongchang	scaffold53355	2473785	2478035	0	45	41	5	91
78	1	37049410	37099409	Rongchang	scaffold53355	2478250	2478851	0	0	4	2	6
78	1	37049410	37099409	Tibetan wild boar	scaffold21683	42875	47126	0	8	\	17	25
79	1	37567403	37617402	Jinhua	scaffold39487.2	758835	763280	0	4	0	\	4
79	1	37567403	37617402	Large White	scaffold8423	1608532	1610520	0	0	0	12	12
79	1	37567403	37617402	Large White	scaffold8423	1610754	1616028	0	0	0	9	9
79	1	37567403	37617402	Rongchang	scaffold53355	2830893	2832919	0	0	0	4	4
80	1	37788375	37838374	Berkshire	scaffold18029.2	1081313	1082247	0	0	7	\	7
80	1	37788375	37838374	Berkshire	scaffold18029.2	1082370	1083455	0	4	17	\	21
80	1	37788375	37838374	Berkshire	scaffold18029.2	1083514	1084369	0	15	33	\	48
80	1	37788375	37838374	Berkshire	scaffold18029.2	1084585	1088273	89	72	99	\	260
80	1	37788375	37838374	Bamei	scaffold53047	5717892	5719002	0	2	12	\	14
80	1	37788375	37838374	Bamei	scaffold53047	5719048	5719900	0	8	13	\	21
80	1	37788375	37838374	Bamei	scaffold53047	5720113	5723393	18	68	76	\	162
80	1	37788375	37838374	Hampshire	scaffold25811.1	1179165	1180103	0	0	6	\	6
80	1	37788375	37838374	Hampshire	scaffold25811.1	1180244	1181300	0	18	13	\	31
80	1	37788375	37838374	Hampshire	scaffold25811.1	1181367	1181909	0	18	13	\	31
80	1	37788375	37838374	Hampshire	scaffold25811.1	1182440	1186124	64	110	101	\	275
80	1	37788375	37838374	Jinhua	scaffold36225	213181	214273	0	5	27	\	32
80	1	37788375	37838374	Jinhua	scaffold36225	214339	215178	0	30	22	\	52
80	1	37788375	37838374	Jinhua	scaffold36225	215391	217034	1	35	39	\	75
80	1	37788375	37838374	Jinhua	scaffold36225	217036	219098	86	55	57	\	198
80	1	37788375	37838374	Landrace	scaffold36705.2	23565	24529	0	0	6	\	6
80	1	37788375	37838374	Landrace	scaffold36705.2	24669	25737	0	7	18	\	25
80	1	37788375	37838374	Landrace	scaffold36705.2	25800	26647	0	19	19	\	38
80	1	37788375	37838374	Landrace	scaffold36705.2	26862	30550	67	69	67	\	203
80	1	37788375	37838374	Large White	scaffold8423	1879688	1882791	0	0	0	5	5
80	1	37788375	37838374	Large White	scaffold8423	1884035	1885003	0	0	10	10	20
80	1	37788375	37838374	Large White	scaffold8423	1885135	1886228	0	3	33	3	39
80	1	37788375	37838374	Large White	scaffold8423	1886284	1887132	0	15	23	5	43
80	1	37788375	37838374	Large White	scaffold8423	1887344	1891038	70	54	88	30	242
80	1	37788375	37838374	Meishan	scaffold2983	1922192	1923157	0	0	4	\	4
80	1	37788375	37838374	Meishan	scaffold2983	1923287	1924401	0	3	16	\	19
80	1	37788375	37838374	Meishan	scaffold2983	1924446	1924972	0	9	8	\	17
80	1	37788375	37838374	Meishan	scaffold2983	1925498	1928791	39	71	80	\	190
80	1	37788375	37838374	Piétrain	scaffold36263.5	48941	50019	0	9	29	\	38
80	1	37788375	37838374	Piétrain	scaffold36263.5	50070	50931	0	39	18	\	57
80	1	37788375	37838374	Piétrain	scaffold36263.5	51132	54829	42	89	106	\	237
80	1	37788375	37838374	Rongchang	scaffold53355	3108072	3109035	0	0	8	0	8
80	1	37788375	37838374	Rongchang	scaffold53355	3109158	3110263	0	4	17	2	23
80	1	37788375	37838374	Rongchang	scaffold53355	3110302	3111151	0	16	17	0	33
80	1	37788375	37838374	Rongchang	scaffold53355	3111373	3115046	59	44	49	25	177
80	1	37788375	37838374	Tibetan wild boar	scaffold14350.1	214554	218264	42	11	\	5	58
81	1	37910503	37960502	Bamei	scaffold53047	5917304	5917805	8	0	4	\	12
81	1	37910503	37960502	Landrace	scaffold36705.3	145041	145555	16	0	1	\	17
81	1	37910503	37960502	Large White	scaffold8423	2084343	2084869	24	1	3	0	28
81	1	37910503	37960502	Piétrain	scaffold36263.5	249145	249660	14	0	5	\	19
81	1	37910503	37960502	Rongchang	scaffold53355	3308490	3309001	5	0	0	0	5
81	1	37910503	37960502	Tibetan wild boar	scaffold14350.1	12840	13372	7	0	\	0	7
82	1	38111211	38161210	Berkshire	scaffold18029.2	1429858	1430757	28	7	19	\	54
82	1	38111211	38161210	Berkshire	scaffold18029.2	1488306	1491307	102	60	75	\	237
82	1	38111211	38161210	Bamei	scaffold53047	6064523	6065489	23	12	13	\	48
82	1	38111211	38161210	Bamei	scaffold53047	6123268	6126265	52	65	65	\	182
82	1	38111211	38161210	Hampshire	scaffold25811.1	1527779	1528731	8	14	13	\	35
82	1	38111211	38161210	Hampshire	scaffold25811.1	1585981	1588980	68	67	64	\	199
82	1	38111211	38161210	Jinhua	scaffold36225	560029	560892	23	4	7	\	34
82	1	38111211	38161210	Jinhua	scaffold36225	618182	621129	48	60	64	\	172
82	1	38111211	38161210	Jinhua	scaffold550523	156	1158	18	12	11	\	41
82	1	38111211	38161210	Landrace	scaffold36705.3	293135	294089	24	7	4	\	35
82	1	38111211	38161210	Landrace	scaffold36705.3	351348	354364	69	63	70	\	202
82	1	38111211	38161210	Large White	scaffold8423	2231157	2232133	22	3	8	6	39
82	1	38111211	38161210	Large White	scaffold8423	2238344	2240472	0	0	0	6	6
82	1	38111211	38161210	Large White	scaffold8423	2272581	2273198	0	0	0	7	7
82	1	38111211	38161210	Large White	scaffold8423	2289599	2292610	74	53	64	9	200
82	1	38111211	38161210	Meishan	scaffold2983	2270029	2271014	30	16	11	\	57
82	1	38111211	38161210	Meishan	scaffold2983	2328160	2331175	54	63	79	\	196
82	1	38111211	38161210	Piétrain	scaffold36263.5	395973	396914	20	13	10	\	43
82	1	38111211	38161210	Piétrain	scaffold36263.5	454222	457230	47	90	66	\	203
82	1	38111211	38161210	Rongchang	scaffold53355	3454779	3455859	22	6	8	8	44
82	1	38111211	38161210	Rongchang	scaffold53355	3461945	3464052	0	0	1	7	8
82	1	38111211	38161210	Rongchang	scaffold53355	3465641	3467648	0	0	0	6	6
82	1	38111211	38161210	Rongchang	scaffold53355	3496055	3496677	0	0	0	4	4
82	1	38111211	38161210	Rongchang	scaffold53355	3513076	3516090	60	48	38	8	154
82	1	38111211	38161210	Tibetan wild boar	scaffold17880	132776	133780	21	2	\	0	23
82	1	38111211	38161210	Tibetan wild boar	scaffold17880	174024	174646	0	0	\	5	5
82	1	38111211	38161210	Tibetan wild boar	scaffold17880	190892	193922	33	19	\	2	54
84	1	39690920	39740919	Berkshire	scaffold6751	2329493	2330674	48	26	28	\	102
84	1	39690920	39740919	Berkshire	scaffold6751	2333735	2334974	0	11	38	\	49
84	1	39690920	39740919	Berkshire	scaffold6751	2381138	2383188	0	0	23	\	23
84	1	39690920	39740919	Berkshire	scaffold6751	2386098	2387203	25	27	17	\	69
84	1	39690920	39740919	Berkshire	scaffold6751	2387221	2388537	59	10	0	\	69
84	1	39690920	39740919	Berkshire	scaffold6751	2392701	2395347	22	31	21	\	74
84	1	39690920	39740919	Berkshire	scaffold6751	2396012	2396680	0	13	10	\	23
84	1	39690920	39740919	Berkshire	scaffold6751	2396777	2398021	0	22	39	\	61
84	1	39690920	39740919	Bamei	scaffold16723	2640432	2641595	18	31	27	\	76
84	1	39690920	39740919	Bamei	scaffold16723	2644981	2646238	0	8	32	\	40
84	1	39690920	39740919	Bamei	scaffold16723	2692422	2694494	0	1	4	\	5
84	1	39690920	39740919	Bamei	scaffold16723	2697372	2698494	10	18	25	\	53
84	1	39690920	39740919	Bamei	scaffold16723	2698510	2699818	51	11	0	\	62
84	1	39690920	39740919	Bamei	scaffold16723	2704005	2704535	7	2	0	\	9
84	1	39690920	39740919	Bamei	scaffold16723	2704544	2705356	0	15	1	\	16
84	1	39690920	39740919	Bamei	scaffold16723	2705358	2706631	0	25	21	\	46
84	1	39690920	39740919	Bamei	scaffold16723	2707307	2707969	0	15	12	\	27
84	1	39690920	39740919	Bamei	scaffold16723	2708076	2709300	0	12	36	\	48
84	1	39690920	39740919	Hampshire	scaffold16101	2313312	2314488	41	31	18	\	90
84	1	39690920	39740919	Hampshire	scaffold16101	2317769	2319012	0	15	37	\	52
84	1	39690920	39740919	Hampshire	scaffold16101	2365635	2367681	0	0	11	\	11
84	1	39690920	39740919	Hampshire	scaffold16101	2370649	2371683	10	37	2	\	49
84	1	39690920	39740919	Hampshire	scaffold16101	2371734	2373037	61	7	4	\	72
84	1	39690920	39740919	Hampshire	scaffold16101	2377233	2377768	13	2	0	\	15
84	1	39690920	39740919	Hampshire	scaffold16101	2377777	2378578	2	12	0	\	14
84	1	39690920	39740919	Hampshire	scaffold16101	2378581	2379866	0	20	8	\	28
84	1	39690920	39740919	Hampshire	scaffold16101	2380533	2381199	0	28	18	\	46
84	1	39690920	39740919	Hampshire	scaffold16101	2381293	2382533	0	26	28	\	54
84	1	39690920	39740919	Hampshire	scaffold16101	2383398	2384082	0	0	6	\	6
84	1	39690920	39740919	Jinhua	scaffold15903	2327659	2328822	56	29	19	\	104
84	1	39690920	39740919	Jinhua	scaffold15903	2331901	2333130	0	24	32	\	56
84	1	39690920	39740919	Jinhua	scaffold15903	2378934	2381025	0	0	7	\	7
84	1	39690920	39740919	Jinhua	scaffold15903	2383885	2385002	13	25	28	\	66
84	1	39690920	39740919	Jinhua	scaffold15903	2385022	2386334	66	10	2	\	78
84	1	39690920	39740919	Jinhua	scaffold15903	2390497	2391047	10	1	0	\	11
84	1	39690920	39740919	Jinhua	scaffold15903	2391057	2393190	1	51	31	\	83
84	1	39690920	39740919	Jinhua	scaffold15903	2393796	2394473	0	14	10	\	24
84	1	39690920	39740919	Jinhua	scaffold15903	2394568	2395805	0	15	31	\	46
84	1	39690920	39740919	Landrace	scaffold22853.1	564982	566219	0	12	22	\	34
84	1	39690920	39740919	Landrace	scaffold22853.1	566324	566990	0	10	15	\	25
84	1	39690920	39740919	Landrace	scaffold22853.1	567650	569739	1	45	5	\	51
84	1	39690920	39740919	Landrace	scaffold22853.1	569747	570279	17	0	0	\	17
84	1	39690920	39740919	Landrace	scaffold22853.1	574468	575804	70	8	0	\	78
84	1	39690920	39740919	Landrace	scaffold22853.1	575807	576849	11	16	5	\	32
84	1	39690920	39740919	Landrace	scaffold22853.1	579812	581866	0	1	16	\	17
84	1	39690920	39740919	Landrace	scaffold22853.1	628152	629389	2	8	36	\	46
84	1	39690920	39740919	Landrace	scaffold22853.1	632714	633884	49	19	17	\	85
84	1	39690920	39740919	Large White	scaffold30231	484543	485230	0	0	9	4	13
84	1	39690920	39740919	Large White	scaffold30231	486079	487321	0	22	23	0	45
84	1	39690920	39740919	Large White	scaffold30231	487407	488084	0	9	19	0	28
84	1	39690920	39740919	Large White	scaffold30231	488749	490033	0	28	14	0	42
84	1	39690920	39740919	Large White	scaffold30231	490054	490844	4	7	0	0	11
84	1	39690920	39740919	Large White	scaffold30231	490849	491388	12	0	0	0	12
84	1	39690920	39740919	Large White	scaffold30231	495598	496894	65	12	1	0	78
84	1	39690920	39740919	Large White	scaffold30231	496921	497954	15	17	15	0	47
84	1	39690920	39740919	Large White	scaffold30231	500931	502966	0	1	16	15	32
84	1	39690920	39740919	Large White	scaffold30231	549222	550479	0	12	24	7	43
84	1	39690920	39740919	Large White	scaffold30231	553848	555002	35	17	18	5	75
84	1	39690920	39740919	Meishan	scaffold17755	2325183	2326357	53	29	20	\	102
84	1	39690920	39740919	Meishan	scaffold17755	2329464	2330666	0	13	29	\	42
84	1	39690920	39740919	Meishan	scaffold17755	2376284	2378364	0	1	12	\	13
84	1	39690920	39740919	Meishan	scaffold17755	2381445	2383886	70	35	11	\	116
84	1	39690920	39740919	Meishan	scaffold17755	2388057	2388600	10	0	0	\	10
84	1	39690920	39740919	Meishan	scaffold17755	2388606	2390737	2	30	18	\	50
84	1	39690920	39740919	Meishan	scaffold17755	2391374	2392028	0	13	13	\	26
84	1	39690920	39740919	Meishan	scaffold17755	2392121	2393365	0	20	41	\	61
84	1	39690920	39740919	Piétrain	scaffold20821	573068	574304	0	21	31	\	52
84	1	39690920	39740919	Piétrain	scaffold20821	574399	575054	0	30	24	\	54
84	1	39690920	39740919	Piétrain	scaffold20821	575727	577837	2	48	15	\	65
84	1	39690920	39740919	Piétrain	scaffold20821	577843	578376	6	1	0	\	7
84	1	39690920	39740919	Piétrain	scaffold20821	582559	583864	62	4	1	\	67
84	1	39690920	39740919	Piétrain	scaffold20821	583887	584943	6	38	15	\	59
84	1	39690920	39740919	Piétrain	scaffold20821	587907	589950	0	0	15	\	15
84	1	39690920	39740919	Piétrain	scaffold20821	636124	637366	0	15	35	\	50
84	1	39690920	39740919	Piétrain	scaffold20821	640724	641892	52	31	20	\	103
84	1	39690920	39740919	Rongchang	scaffold53355	4791204	4791883	0	0	2	3	5
84	1	39690920	39740919	Rongchang	scaffold53355	4792824	4794038	0	12	21	0	33
84	1	39690920	39740919	Rongchang	scaffold53355	4794132	4794798	0	6	9	0	15
84	1	39690920	39740919	Rongchang	scaffold53355	4795464	4797553	2	27	8	0	37
84	1	39690920	39740919	Rongchang	scaffold53355	4797562	4798088	9	0	0	0	9
84	1	39690920	39740919	Rongchang	scaffold53355	4802277	4803605	37	6	0	0	43
84	1	39690920	39740919	Rongchang	scaffold53355	4803615	4804710	8	18	1	0	27
84	1	39690920	39740919	Rongchang	scaffold53355	4807605	4809671	0	1	11	6	18
84	1	39690920	39740919	Rongchang	scaffold53355	4855499	4856694	3	27	22	6	58
84	1	39690920	39740919	Rongchang	scaffold53355	4859810	4860978	26	20	13	6	65
84	1	39690920	39740919	Tibetan wild boar	scaffold17496	158659	159333	0	6	\	0	6
84	1	39690920	39740919	Tibetan wild boar	scaffold17496	159952	162080	2	9	\	0	11
84	1	39690920	39740919	Tibetan wild boar	scaffold17496	162109	162633	13	0	\	0	13
84	1	39690920	39740919	Tibetan wild boar	scaffold17496	166799	169254	46	26	\	0	72
84	1	39690920	39740919	Tibetan wild boar	scaffold17496	220015	221212	0	4	\	0	4
84	1	39690920	39740919	Tibetan wild boar	scaffold17496	224325	225515	29	8	\	2	39
85	1	40102058	40152057	Berkshire	scaffold6751	2116460	2117562	3	15	35	\	53
85	1	40102058	40152057	Bamei	scaffold16723	2426936	2428044	2	28	27	\	57
85	1	40102058	40152057	Hampshire	scaffold16101	2102747	2103836	0	5	7	\	12
85	1	40102058	40152057	Jinhua	scaffold15903	2114703	2115832	3	18	34	\	55
85	1	40102058	40152057	Landrace	scaffold22853.1	843299	844409	1	12	13	\	26
85	1	40102058	40152057	Large White	scaffold30231	764688	765792	2	3	25	4	34
85	1	40102058	40152057	Meishan	scaffold17755	2110249	2111380	6	14	17	\	37
85	1	40102058	40152057	Piétrain	scaffold20821	850969	852065	9	11	26	\	46
85	1	40102058	40152057	Rongchang	scaffold53355	5074076	5075200	6	15	21	0	42
85	1	40102058	40152057	Tibetan wild boar	scaffold17496	438572	439697	0	13	\	2	15
86	1	41557641	41607640	Berkshire	scaffold6751	481922	482438	0	2	6	\	8
86	1	41557641	41607640	Bamei	scaffold16723	789022	789537	0	0	9	\	9
86	1	41557641	41607640	Hampshire	scaffold16101	482003	482515	0	3	11	\	14
86	1	41557641	41607640	Jinhua	scaffold15903	482209	482727	0	5	6	\	11
86	1	41557641	41607640	Landrace	scaffold22853.3	1027626	1028136	0	9	4	\	13
86	1	41557641	41607640	Large White	scaffold37803	1564014	1564532	0	2	9	1	12
86	1	41557641	41607640	Meishan	scaffold17755	477104	477622	0	3	2	\	5
86	1	41557641	41607640	Piétrain	scaffold20821	2495267	2495796	0	4	8	\	12
86	1	41557641	41607640	Rongchang	scaffold54339	474381	474900	0	3	5	0	8
87	1	41772713	41822712	Berkshire	scaffold6751	475385	476590	0	12	24	\	36
87	1	41772713	41822712	Berkshire	scaffold6751	476617	481408	0	52	72	\	124
87	1	41772713	41822712	Berkshire	scaffold6751	582806	583509	0	0	5	\	5
87	1	41772713	41822712	Berkshire	scaffold6751	583716	584836	0	9	33	\	42
87	1	41772713	41822712	Berkshire	scaffold6751	600625	601208	7	14	10	\	31
87	1	41772713	41822712	Bamei	scaffold16723	782513	783714	0	32	18	\	50
87	1	41772713	41822712	Bamei	scaffold16723	783720	788519	0	47	59	\	106
87	1	41772713	41822712	Bamei	scaffold16723	890882	891964	0	9	26	\	35
87	1	41772713	41822712	Bamei	scaffold16723	907801	908380	10	6	7	\	23
87	1	41772713	41822712	Hampshire	scaffold16101	475467	476656	0	30	11	\	41
87	1	41772713	41822712	Hampshire	scaffold16101	476691	481493	0	75	74	\	149
87	1	41772713	41822712	Hampshire	scaffold16101	582671	583367	0	0	21	\	21
87	1	41772713	41822712	Hampshire	scaffold16101	583578	584696	0	23	28	\	51
87	1	41772713	41822712	Hampshire	scaffold16101	600633	601212	7	9	18	\	34
87	1	41772713	41822712	Jinhua	scaffold15903	475673	476878	0	21	15	\	36
87	1	41772713	41822712	Jinhua	scaffold15903	476900	481685	0	90	71	\	161
87	1	41772713	41822712	Jinhua	scaffold15903	583800	584923	0	17	20	\	37
87	1	41772713	41822712	Jinhua	scaffold15903	600706	601288	2	4	14	\	20
87	1	41772713	41822712	Landrace	scaffold22853.3	1028647	1033431	0	58	62	\	120
87	1	41772713	41822712	Landrace	scaffold22853.3	1033487	1034666	0	8	15	\	23
87	1	41772713	41822712	Landrace	scaffold22853.3	908620	909198	5	9	7	\	21
87	1	41772713	41822712	Landrace	scaffold22853.3	924988	926065	0	19	11	\	30
87	1	41772713	41822712	Landrace	scaffold22853.3	926341	927006	0	0	13	\	13
87	1	41772713	41822712	Large White	scaffold37803	1445613	1446201	7	7	9	3	26
87	1	41772713	41822712	Large White	scaffold37803	1461954	1463049	0	8	21	9	38
87	1	41772713	41822712	Large White	scaffold37803	1463321	1463969	0	0	10	6	16
87	1	41772713	41822712	Large White	scaffold37803	1565057	1569841	0	34	78	7	119
87	1	41772713	41822712	Large White	scaffold37803	1569857	1571053	0	23	34	0	57
87	1	41772713	41822712	Meishan	scaffold17755	470543	471781	0	32	19	\	51
87	1	41772713	41822712	Meishan	scaffold17755	471795	476586	0	47	66	\	113
87	1	41772713	41822712	Meishan	scaffold17755	578786	579445	0	0	9	\	9
87	1	41772713	41822712	Meishan	scaffold17755	579697	580809	1	14	26	\	41
87	1	41772713	41822712	Meishan	scaffold17755	596543	597120	3	13	10	\	26
87	1	41772713	41822712	Piétrain	scaffold20821	2375982	2376557	4	12	14	\	30
87	1	41772713	41822712	Piétrain	scaffold20821	2392346	2393451	0	22	31	\	53
87	1	41772713	41822712	Piétrain	scaffold20821	2393680	2394360	0	0	11	\	11
87	1	41772713	41822712	Piétrain	scaffold20821	2496298	2502283	0	146	131	\	277
87	1	41772713	41822712	Rongchang	scaffold54339	355586	356181	3	8	7	0	18
87	1	41772713	41822712	Rongchang	scaffold54339	371983	373085	0	16	15	6	37
87	1	41772713	41822712	Rongchang	scaffold54339	373331	373993	0	0	5	3	8
87	1	41772713	41822712	Rongchang	scaffold54339	475440	481408	0	32	45	0	77
87	1	41772713	41822712	Rongchang	scaffold621544	15	3884	0	27	15	0	42
87	1	41772713	41822712	Tibetan wild boar	scaffold17496	1979981	1980573	8	5	\	0	13
87	1	41772713	41822712	Tibetan wild boar	scaffold17496	2102386	2108397	0	19	\	5	24
88	1	41905571	41955570	Berkshire	scaffold6751	440526	441351	0	3	5	\	8
88	1	41905571	41955570	Berkshire	scaffold6751	552009	553023	0	7	13	\	20
88	1	41905571	41955570	Bamei	scaffold16723	747585	748377	0	3	4	\	7
88	1	41905571	41955570	Bamei	scaffold16723	859160	859852	0	5	11	\	16
88	1	41905571	41955570	Hampshire	scaffold16101	440675	441510	0	5	4	\	9
88	1	41905571	41955570	Hampshire	scaffold16101	551861	552869	0	10	8	\	18
88	1	41905571	41955570	Jinhua	scaffold15903	440781	441613	0	0	4	\	4
88	1	41905571	41955570	Jinhua	scaffold15903	552130	553139	0	5	14	\	19
88	1	41905571	41955570	Landrace	scaffold22853.3	1068727	1069557	0	3	6	\	9
88	1	41905571	41955570	Landrace	scaffold22853.3	956788	957782	0	12	4	\	16
88	1	41905571	41955570	Large White	scaffold37803	1493752	1494755	0	3	4	0	7
88	1	41905571	41955570	Large White	scaffold37803	1605049	1605861	0	3	8	0	11
88	1	41905571	41955570	Meishan	scaffold17755	435666	436514	0	5	9	\	14
88	1	41905571	41955570	Meishan	scaffold17755	547974	548985	0	7	9	\	16
88	1	41905571	41955570	Piétrain	scaffold20821	2424083	2425085	0	13	13	\	26
88	1	41905571	41955570	Piétrain	scaffold20821	2536239	2537049	0	5	5	\	10
88	1	41905571	41955570	Rongchang	scaffold54339	403943	404947	0	8	1	0	9
88	1	41905571	41955570	Rongchang	scaffold54339	515467	516284	0	3	1	0	4
90	1	42593093	42643092	Berkshire	scaffold32441	160538	161259	58	14	3	\	75
90	1	42593093	42643092	Berkshire	scaffold32441	166591	168031	0	21	5	\	26
90	1	42593093	42643092	Bamei	scaffold16723	132523	133965	0	29	0	\	29
90	1	42593093	42643092	Bamei	scaffold16723	139384	140105	24	14	8	\	46
90	1	42593093	42643092	Hampshire	scaffold35087	158913	159623	24	15	1	\	40
90	1	42593093	42643092	Hampshire	scaffold35087	164956	166368	0	37	5	\	42
90	1	42593093	42643092	Jinhua	scaffold19897	601228	602665	2	37	16	\	55
90	1	42593093	42643092	Jinhua	scaffold19897	608079	608803	32	19	8	\	59
90	1	42593093	42643092	Landrace	scaffold22853.3	1675804	1676510	33	10	1	\	44
90	1	42593093	42643092	Landrace	scaffold22853.3	1681939	1683378	0	16	5	\	21
90	1	42593093	42643092	Large White	scaffold37803	2193705	2198187	0	0	0	5	5
90	1	42593093	42643092	Large White	scaffold37803	2221487	2222188	40	10	4	4	58
90	1	42593093	42643092	Large White	scaffold37803	2227607	2229048	0	21	4	4	29
90	1	42593093	42643092	Large White	scaffold37803	2245774	2247723	0	0	0	5	5
90	1	42593093	42643092	Meishan	scaffold52471	159247	159968	38	13	1	\	52
90	1	42593093	42643092	Meishan	scaffold52471	165294	166734	0	25	2	\	27
90	1	42593093	42643092	Piétrain	scaffold37051	385509	386221	12	20	1	\	33
90	1	42593093	42643092	Piétrain	scaffold37051	391586	392953	0	36	14	\	50
90	1	42593093	42643092	Rongchang	scaffold54339	1098569	1103060	0	0	0	5	5
90	1	42593093	42643092	Rongchang	scaffold54339	1126354	1127065	31	7	4	2	44
90	1	42593093	42643092	Rongchang	scaffold54339	1132481	1133921	0	15	1	3	19
90	1	42593093	42643092	Rongchang	scaffold54339	1148056	1149259	0	0	0	4	4
90	1	42593093	42643092	Rongchang	scaffold54339	1150669	1152605	0	0	0	10	10
90	1	42593093	42643092	Tibetan wild boar	scaffold17496	2756129	2756858	18	4	\	0	22
90	1	42593093	42643092	Tibetan wild boar	scaffold17496	2762183	2763626	0	17	\	3	20
91	1	42990520	43040519	Berkshire	scaffold32441	455095	456228	16	10	0	\	26
91	1	42990520	43040519	Berkshire	scaffold32441	519850	521464	0	2	13	\	15
91	1	42990520	43040519	Berkshire	scaffold32441	522054	523216	0	21	27	\	48
91	1	42990520	43040519	Berkshire	scaffold32441	523236	523739	0	13	8	\	21
91	1	42990520	43040519	Bamei	scaffold7091	155392	156541	4	12	1	\	17
91	1	42990520	43040519	Bamei	scaffold7091	219966	221590	0	3	8	\	11
91	1	42990520	43040519	Bamei	scaffold7091	222187	223330	0	24	33	\	57
91	1	42990520	43040519	Bamei	scaffold7091	223337	223868	0	5	10	\	15
91	1	42990520	43040519	Hampshire	scaffold35087	453617	454758	12	7	0	\	19
91	1	42990520	43040519	Hampshire	scaffold35087	520500	521645	0	34	30	\	64
91	1	42990520	43040519	Hampshire	scaffold35087	521649	522162	0	11	8	\	19
91	1	42990520	43040519	Jinhua	scaffold19897	244519	246204	0	49	29	\	78
91	1	42990520	43040519	Jinhua	scaffold19897	246798	248416	0	0	10	\	10
91	1	42990520	43040519	Jinhua	scaffold19897	312230	313362	6	6	0	\	12
91	1	42990520	43040519	Landrace	scaffold22853.3	1748269	1748820	4	0	0	\	4
91	1	42990520	43040519	Landrace	scaffold22853.3	1970431	1971536	8	4	0	\	12
91	1	42990520	43040519	Landrace	scaffold22853.3	2035076	2036704	0	1	5	\	6
91	1	42990520	43040519	Landrace	scaffold22853.3	2037283	2038945	0	25	21	\	46
91	1	42990520	43040519	Large White	scaffold37803	2515551	2516687	20	6	0	0	26
91	1	42990520	43040519	Large White	scaffold37803	2580444	2582071	0	1	5	3	9
91	1	42990520	43040519	Large White	scaffold37803	2582648	2584323	0	29	33	13	75
91	1	42990520	43040519	Meishan	scaffold52471	454599	455730	10	4	1	\	15
91	1	42990520	43040519	Meishan	scaffold52471	519272	520887	0	3	4	\	7
91	1	42990520	43040519	Meishan	scaffold52471	521488	523153	0	33	34	\	67
91	1	42990520	43040519	Piétrain	scaffold37051	680551	681685	1	4	4	\	9
91	1	42990520	43040519	Piétrain	scaffold37051	746616	748237	0	3	6	\	9
91	1	42990520	43040519	Piétrain	scaffold37051	748816	750502	0	50	46	\	96
91	1	42990520	43040519	Rongchang	scaffold54339	1421997	1423168	7	2	2	0	11
91	1	42990520	43040519	Rongchang	scaffold54339	1488863	1490518	0	19	21	1	41
91	1	42990520	43040519	Tibetan wild boar	scaffold13466	299125	300150	0	4	\	0	4
91	1	42990520	43040519	Tibetan wild boar	scaffold21248	402754	404418	0	20	\	13	33
91	1	42990520	43040519	Tibetan wild boar	scaffold21248	470504	471663	4	5	\	0	9
92	1	43357755	43407754	Berkshire	scaffold32441	758772	760330	84	34	46	\	164
92	1	43357755	43407754	Berkshire	scaffold32441	760560	767879	1	93	122	\	216
92	1	43357755	43407754	Berkshire	scaffold9057.1	422909	425298	4	0	0	\	4
92	1	43357755	43407754	Bamei	scaffold7091	459347	460887	49	26	45	\	120
92	1	43357755	43407754	Bamei	scaffold7091	461141	468452	1	48	102	\	151
92	1	43357755	43407754	Hampshire	scaffold35087	756914	758459	50	57	43	\	150
92	1	43357755	43407754	Hampshire	scaffold35087	758695	766003	4	106	108	\	218
92	1	43357755	43407754	Jinhua	scaffold19897	439	7759	3	90	117	\	210
92	1	43357755	43407754	Jinhua	scaffold19897	7978	9541	66	50	47	\	163
92	1	43357755	43407754	Landrace	scaffold22853.3	2273903	2275459	76	38	31	\	145
92	1	43357755	43407754	Landrace	scaffold22853.3	2275707	2283007	4	56	104	\	164
92	1	43357755	43407754	Large White	scaffold37803	2819947	2821499	71	35	43	12	161
92	1	43357755	43407754	Large White	scaffold37803	2821750	2829042	4	65	133	44	246
92	1	43357755	43407754	Meishan	scaffold52471	758422	759981	57	37	47	\	141
92	1	43357755	43407754	Meishan	scaffold52471	760216	767527	3	52	100	\	155
92	1	43357755	43407754	Piétrain	scaffold37051	985624	987175	39	55	40	\	134
92	1	43357755	43407754	Piétrain	scaffold37051	987402	994719	0	113	121	\	234
92	1	43357755	43407754	Rongchang	scaffold54339	1725209	1726776	52	21	23	2	98
92	1	43357755	43407754	Rongchang	scaffold54339	1726995	1734302	0	35	70	29	134
92	1	43357755	43407754	Tibetan wild boar	scaffold21248	156288	163612	1	16	\	6	23
92	1	43357755	43407754	Tibetan wild boar	scaffold21248	163830	165395	46	14	\	6	66
94	1	44618513	44668512	Berkshire	scaffold36953	939965	942046	74	14	42	\	130
94	1	44618513	44668512	Berkshire	scaffold36953	950371	951933	0	12	11	\	23
94	1	44618513	44668512	Berkshire	scaffold6599	275203	278214	0	11	35	\	46
94	1	44618513	44668512	Bamei	scaffold12229	1280066	1283088	0	10	22	\	32
94	1	44618513	44668512	Bamei	scaffold33753	149080	150627	0	20	14	\	34
94	1	44618513	44668512	Bamei	scaffold33753	158961	161055	49	14	30	\	93
94	1	44618513	44668512	Hampshire	scaffold26863.1	275693	278713	0	21	43	\	64
94	1	44618513	44668512	Hampshire	scaffold34945.1	1121643	1123741	107	6	53	\	166
94	1	44618513	44668512	Hampshire	scaffold34945.1	1132061	1133629	0	18	15	\	33
94	1	44618513	44668512	Jinhua	scaffold25689.1	156835	159861	0	17	21	\	38
94	1	44618513	44668512	Jinhua	scaffold3687	660230	662319	78	15	20	\	113
94	1	44618513	44668512	Jinhua	scaffold3687	670655	672212	0	30	10	\	40
94	1	44618513	44668512	Landrace	scaffold31051.2	3062780	3065803	0	16	25	\	41
94	1	44618513	44668512	Landrace	scaffold39107.3	41617	43703	99	14	31	\	144
94	1	44618513	44668512	Landrace	scaffold39107.3	52023	53599	0	17	17	\	34
94	1	44618513	44668512	Large White	scaffold29989	658774	660852	64	18	49	2	133
94	1	44618513	44668512	Large White	scaffold29989	669174	670729	0	19	14	19	52
94	1	44618513	44668512	Large White	scaffold9223.1	1278916	1281931	0	25	41	16	82
94	1	44618513	44668512	Meishan	scaffold52143	231093	234127	0	10	41	\	51
94	1	44618513	44668512	Meishan	scaffold52169	666592	668675	62	12	44	\	118
94	1	44618513	44668512	Meishan	scaffold52169	677003	678574	0	27	11	\	38
94	1	44618513	44668512	Piétrain	scaffold28129.2	407082	409168	62	14	42	\	118
94	1	44618513	44668512	Piétrain	scaffold28129.2	417483	419046	0	14	18	\	32
94	1	44618513	44668512	Piétrain	scaffold36621	1112842	1115863	0	21	49	\	70
94	1	44618513	44668512	Rongchang	scaffold13433.2	4584934	4587957	0	7	34	13	54
94	1	44618513	44668512	Rongchang	scaffold6317	580737	582841	57	14	23	0	94
94	1	44618513	44668512	Rongchang	scaffold6317	591184	592755	0	7	10	0	17
94	1	44618513	44668512	Tibetan wild boar	scaffold16639	967715	970720	0	2	\	3	5
94	1	44618513	44668512	Tibetan wild boar	scaffold18039.1	6488	8597	50	5	\	0	55
95	1	44873585	44923584	Berkshire	scaffold36953	780433	781265	42	15	11	\	68
95	1	44873585	44923584	Berkshire	scaffold36953	781673	782871	6	29	24	\	59
95	1	44873585	44923584	Berkshire	scaffold36953	785093	785816	0	2	17	\	19
95	1	44873585	44923584	Berkshire	scaffold36953	785922	786497	0	0	11	\	11
95	1	44873585	44923584	Bamei	scaffold33753	314530	315116	0	0	6	\	6
95	1	44873585	44923584	Bamei	scaffold33753	315171	315942	0	0	18	\	18
95	1	44873585	44923584	Bamei	scaffold33753	318153	319337	4	15	36	\	55
95	1	44873585	44923584	Bamei	scaffold33753	319750	320604	19	15	32	\	66
95	1	44873585	44923584	Hampshire	scaffold34945.1	962321	963163	24	14	11	\	49
95	1	44873585	44923584	Hampshire	scaffold34945.1	963576	964775	8	36	25	\	69
95	1	44873585	44923584	Hampshire	scaffold34945.1	967010	967720	0	4	6	\	10
95	1	44873585	44923584	Hampshire	scaffold34945.1	967848	968377	0	0	12	\	12
95	1	44873585	44923584	Jinhua	scaffold3687	500746	501590	26	18	20	\	64
95	1	44873585	44923584	Jinhua	scaffold3687	502005	503215	5	33	42	\	80
95	1	44873585	44923584	Jinhua	scaffold3687	505404	506119	0	2	14	\	16
95	1	44873585	44923584	Landrace	scaffold39107.1	961770	962605	40	20	7	\	67
95	1	44873585	44923584	Landrace	scaffold39107.1	963034	964214	9	18	25	\	52
95	1	44873585	44923584	Landrace	scaffold39107.1	966414	967188	0	0	6	\	6
95	1	44873585	44923584	Large White	scaffold22167	787632	791638	0	1	3	0	4
95	1	44873585	44923584	Large White	scaffold29989	499521	500364	32	12	9	0	53
95	1	44873585	44923584	Large White	scaffold29989	500766	501956	8	21	22	4	55
95	1	44873585	44923584	Large White	scaffold29989	504192	504925	0	0	16	4	20
95	1	44873585	44923584	Large White	scaffold29989	505015	505602	0	0	5	0	5
95	1	44873585	44923584	Meishan	scaffold42869.1	788005	791960	0	3	1	\	4
95	1	44873585	44923584	Meishan	scaffold52169	506637	507494	38	4	9	\	51
95	1	44873585	44923584	Meishan	scaffold52169	507936	509142	4	28	15	\	47
95	1	44873585	44923584	Meishan	scaffold52169	511354	512053	0	2	11	\	13
95	1	44873585	44923584	Piétrain	scaffold28129.2	247215	248049	19	13	20	\	52
95	1	44873585	44923584	Piétrain	scaffold28129.2	248459	249641	1	38	33	\	72
95	1	44873585	44923584	Piétrain	scaffold28129.2	251873	252623	0	5	14	\	19
95	1	44873585	44923584	Piétrain	scaffold28129.2	252699	253274	0	0	9	\	9
95	1	44873585	44923584	Rongchang	scaffold6317	420905	421754	23	6	7	0	36
95	1	44873585	44923584	Rongchang	scaffold6317	422171	423353	2	14	10	7	33
95	1	44873585	44923584	Rongchang	scaffold6317	425570	426312	0	2	7	0	9
95	1	44873585	44923584	Rongchang	scaffold6317	426415	426977	0	0	13	0	13
95	1	44873585	44923584	Tibetan wild boar	scaffold19839	273759	285829	0	0	\	4	4
95	1	44873585	44923584	Tibetan wild boar	scaffold6078	149779	150986	4	5	\	6	15
95	1	44873585	44923584	Tibetan wild boar	scaffold6078	151389	152253	11	3	\	0	14
97	1	46400576	46450575	Berkshire	scaffold23971	482431	482997	9	8	9	\	26
97	1	46400576	46450575	Bamei	scaffold15279	380154	380713	9	5	8	\	22
97	1	46400576	46450575	Hampshire	scaffold28485	112418	112957	8	6	12	\	26
97	1	46400576	46450575	Jinhua	scaffold2989	380055	380612	9	4	8	\	21
97	1	46400576	46450575	Landrace	scaffold2561	378309	378851	16	4	7	\	27
97	1	46400576	46450575	Large White	scaffold19255.3	217673	218206	9	2	7	0	18
97	1	46400576	46450575	Meishan	scaffold51613	112998	113551	15	7	2	\	24
97	1	46400576	46450575	Piétrain	scaffold9727	378520	379058	10	3	6	\	19
97	1	46400576	46450575	Rongchang	scaffold40901.2	839002	839563	15	6	5	2	28
97	1	46400576	46450575	Tibetan wild boar	scaffold18467.2	111638	112196	5	2	\	0	7
98	1	46620660	46670659	Berkshire	scaffold23971	330018	331932	0	0	47	\	47
98	1	46620660	46670659	Bamei	scaffold46303	636706	638626	0	0	47	\	47
98	1	46620660	46670659	Hampshire	scaffold28485	262662	264588	0	0	60	\	60
98	1	46620660	46670659	Jinhua	scaffold45311.1	57992	59919	0	0	43	\	43
98	1	46620660	46670659	Landrace	scaffold39159	58077	59991	0	0	23	\	23
98	1	46620660	46670659	Large White	scaffold19255.4	17175	19105	0	0	43	13	56
98	1	46620660	46670659	Meishan	scaffold24147	642215	644138	0	0	70	\	70
98	1	46620660	46670659	Piétrain	scaffold9935.2	1986251	1988179	0	1	54	\	55
98	1	46620660	46670659	Rongchang	scaffold40901.3	58073	60018	0	2	31	3	36
100	1	47269855	47319854	Berkshire	scaffold18549	3120055	3125706	125	103	143	\	371
100	1	47269855	47319854	Bamei	scaffold46303	288428	294096	40	101	123	\	264
100	1	47269855	47319854	Hampshire	scaffold28485	607300	608479	0	21	18	\	39
100	1	47269855	47319854	Hampshire	scaffold28485	608505	612952	59	112	97	\	268
100	1	47269855	47319854	Jinhua	scaffold45311.1	404107	405293	0	10	19	\	29
100	1	47269855	47319854	Jinhua	scaffold45311.1	405326	409778	90	104	119	\	313
100	1	47269855	47319854	Landrace	scaffold39159	401029	401673	0	0	6	\	6
100	1	47269855	47319854	Landrace	scaffold39159	402341	403534	0	9	21	\	30
100	1	47269855	47319854	Landrace	scaffold39159	403570	407991	76	69	88	\	233
100	1	47269855	47319854	Large White	scaffold19255.4	355858	359119	0	0	0	28	28
100	1	47269855	47319854	Large White	scaffold19255.4	359244	359882	0	0	2	3	5
100	1	47269855	47319854	Large White	scaffold19255.4	360442	366179	77	95	129	33	334
100	1	47269855	47319854	Meishan	scaffold24147	291804	296255	53	93	84	\	230
100	1	47269855	47319854	Meishan	scaffold24147	296288	297516	0	9	9	\	18
100	1	47269855	47319854	Piétrain	scaffold9935.2	1639232	1643039	52	133	97	\	282
100	1	47269855	47319854	Piétrain	scaffold9935.2	1643052	1643753	0	18	8	\	26
100	1	47269855	47319854	Piétrain	scaffold9935.2	1643778	1644970	0	16	36	\	52
100	1	47269855	47319854	Rongchang	scaffold40901.3	399394	402693	0	0	0	21	21
100	1	47269855	47319854	Rongchang	scaffold40901.3	402818	403460	0	0	4	1	5
100	1	47269855	47319854	Rongchang	scaffold40901.3	404092	405304	0	6	10	7	23
100	1	47269855	47319854	Rongchang	scaffold40901.3	405315	409761	85	55	51	11	202
100	1	47269855	47319854	Tibetan wild boar	scaffold2792	118566	123032	39	38	\	12	89
102	1	47717633	47767632	Berkshire	scaffold18549	2791036	2793343	0	0	21	\	21
102	1	47717633	47767632	Bamei	scaffold53471	1284671	1286985	0	0	15	\	15
102	1	47717633	47767632	Hampshire	scaffold12489	39342	41628	0	0	8	\	8
102	1	47717633	47767632	Jinhua	scaffold17585.1	38831	41142	0	0	16	\	16
102	1	47717633	47767632	Large White	scaffold19255.4	691772	694089	0	0	23	1	24
102	1	47717633	47767632	Meishan	scaffold44727	355008	357312	0	0	14	\	14
102	1	47717633	47767632	Piétrain	scaffold9935.2	1311659	1313950	0	0	10	\	10
102	1	47717633	47767632	Rongchang	scaffold54501	1282199	1284518	0	0	20	3	23
103	1	48416715	48466714	Bamei	scaffold30781	1050693	1052610	5	0	0	\	5
106	1	50571202	50621201	Berkshire	scaffold18549	171910	176039	0	35	64	\	99
106	1	50571202	50621201	Berkshire	scaffold18549	176115	178017	18	48	51	\	117
106	1	50571202	50621201	Berkshire	scaffold18549	178271	179073	32	20	26	\	78
106	1	50571202	50621201	Bamei	scaffold40263	171246	175431	0	34	46	\	80
106	1	50571202	50621201	Bamei	scaffold40263	175445	177360	13	36	61	\	110
106	1	50571202	50621201	Bamei	scaffold40263	177616	178491	25	22	23	\	70
106	1	50571202	50621201	Hampshire	scaffold7407	485283	489414	0	59	65	\	124
106	1	50571202	50621201	Hampshire	scaffold7407	489508	491400	18	50	42	\	110
106	1	50571202	50621201	Hampshire	scaffold7407	491652	492528	20	17	27	\	64
106	1	50571202	50621201	Jinhua	scaffold23453.2	169286	173433	0	31	68	\	99
106	1	50571202	50621201	Jinhua	scaffold23453.2	173518	175407	9	45	44	\	98
106	1	50571202	50621201	Jinhua	scaffold23453.2	175662	176520	27	22	21	\	70
106	1	50571202	50621201	Landrace	scaffold31363	1124822	1125625	20	15	14	\	49
106	1	50571202	50621201	Landrace	scaffold31363	1125878	1127771	16	52	33	\	101
106	1	50571202	50621201	Landrace	scaffold31363	1127840	1131987	0	28	52	\	80
106	1	50571202	50621201	Large White	scaffold28031.6	2261675	2263595	0	0	0	13	13
106	1	50571202	50621201	Large White	scaffold28031.6	2264596	2268740	0	30	69	19	118
106	1	50571202	50621201	Large White	scaffold28031.6	2268930	2270807	20	36	71	2	129
106	1	50571202	50621201	Large White	scaffold28031.6	2271084	2271883	38	17	15	4	74
106	1	50571202	50621201	Meishan	scaffold36973	1302529	1303366	38	19	17	\	74
106	1	50571202	50621201	Meishan	scaffold36973	1303623	1305510	22	46	60	\	128
106	1	50571202	50621201	Meishan	scaffold36973	1305677	1309815	0	29	66	\	95
106	1	50571202	50621201	Piétrain	scaffold9935.1	485396	489525	0	67	85	\	152
106	1	50571202	50621201	Piétrain	scaffold9935.1	489609	491498	6	73	70	\	149
106	1	50571202	50621201	Piétrain	scaffold9935.1	491745	492558	18	20	35	\	73
106	1	50571202	50621201	Rongchang	scaffold27487	168813	172941	0	28	45	6	79
106	1	50571202	50621201	Rongchang	scaffold27487	173074	174977	17	40	20	8	85
106	1	50571202	50621201	Rongchang	scaffold27487	175263	176124	20	14	12	3	49
106	1	50571202	50621201	Tibetan wild boar	scaffold20149	174909	175579	0	0	\	7	7
106	1	50571202	50621201	Tibetan wild boar	scaffold20149	175781	179930	0	5	\	0	5
106	1	50571202	50621201	Tibetan wild boar	scaffold20149	179992	181894	8	16	\	0	24
106	1	50571202	50621201	Tibetan wild boar	scaffold20149	182085	182886	16	1	\	0	17
107	1	50804278	50854277	Bamei	scaffold14003	168086	168931	18	23	18	\	59
107	1	50804278	50854277	Rongchang	scaffold14697	167807	168641	25	3	17	1	46
108	1	51044145	51094144	Berkshire	scaffold22331	168595	169457	45	15	23	\	83
108	1	51044145	51094144	Bamei	scaffold14003	174946	175895	0	6	7	\	13
108	1	51044145	51094144	Hampshire	scaffold7407	130690	131624	0	11	16	\	27
108	1	51044145	51094144	Hampshire	scaffold7407	137663	138495	21	16	17	\	54
108	1	51044145	51094144	Jinhua	scaffold32033	131377	132339	0	13	28	\	41
108	1	51044145	51094144	Jinhua	scaffold32033	138363	139213	42	21	13	\	76
108	1	51044145	51094144	Landrace	scaffold31363	1476578	1477442	40	17	16	\	73
108	1	51044145	51094144	Large White	scaffold28031.6	1844797	1847099	0	0	0	12	12
108	1	51044145	51094144	Large White	scaffold28031.6	1910337	1911320	0	16	12	0	28
108	1	51044145	51094144	Large White	scaffold28031.6	1917301	1918183	46	16	16	7	85
108	1	51044145	51094144	Meishan	scaffold14357	131105	132051	0	9	6	\	15
108	1	51044145	51094144	Meishan	scaffold14357	138301	139180	39	24	22	\	85
108	1	51044145	51094144	Piétrain	scaffold3863	1330327	1335312	0	4	0	\	4
108	1	51044145	51094144	Piétrain	scaffold9935.1	132389	133345	0	16	9	\	25
108	1	51044145	51094144	Piétrain	scaffold9935.1	139361	140227	33	16	17	\	66
108	1	51044145	51094144	Rongchang	scaffold14697	174633	175608	0	12	10	0	22
108	1	51044145	51094144	Rongchang	scaffold14697	240710	241593	0	0	0	6	6
108	1	51044145	51094144	Rongchang	scaffold14697	241605	243029	0	0	0	10	10
108	1	51044145	51094144	Tibetan wild boar	scaffold20058.2	151890	152776	27	7	\	3	37
108	1	51044145	51094144	Tibetan wild boar	scaffold20058.2	158771	159748	0	4	\	0	4
108	1	51044145	51094144	Tibetan wild boar	scaffold20058.2	222874	225291	0	0	\	5	5
109	1	51281746	51331745	Berkshire	scaffold22331	268091	271961	91	63	75	\	229
109	1	51281746	51331745	Bamei	scaffold14003	269218	273082	25	47	49	\	121
109	1	51281746	51331745	Hampshire	scaffold7407	34193	38054	89	75	76	\	240
109	1	51281746	51331745	Jinhua	scaffold32033	33803	37672	81	70	59	\	210
109	1	51281746	51331745	Landrace	scaffold31363	1576956	1579278	70	44	46	\	160
109	1	51281746	51331745	Landrace	scaffold31363	1579474	1581051	0	33	28	\	61
109	1	51281746	51331745	Large White	scaffold28031.6	1814313	1818172	68	45	61	4	178
109	1	51281746	51331745	Meishan	scaffold14357	33986	37835	63	52	44	\	159
109	1	51281746	51331745	Piétrain	scaffold9935.1	34207	38076	57	102	72	\	231
109	1	51281746	51331745	Rongchang	scaffold14697	269739	273599	78	33	39	1	151
109	1	51281746	51331745	Tibetan wild boar	scaffold20058.2	251997	255883	43	22	\	6	71
110	1	51601318	51651317	Berkshire	scaffold23701.1	176958	178155	47	38	31	\	116
110	1	51601318	51651317	Bamei	scaffold52967	357891	359050	12	14	9	\	35
110	1	51601318	51651317	Bamei	scaffold619192	12	969	11	4	7	\	22
110	1	51601318	51651317	Hampshire	scaffold10961	179208	180400	50	34	18	\	102
110	1	51601318	51651317	Jinhua	scaffold12143.1	177322	178511	57	32	29	\	118
110	1	51601318	51651317	Landrace	scaffold24575	171835	173020	51	26	22	\	99
110	1	51601318	51651317	Large White	scaffold28031.6	1414038	1415230	78	19	37	4	138
110	1	51601318	51651317	Large White	scaffold28031.6	1422771	1423587	0	0	0	6	6
110	1	51601318	51651317	Meishan	scaffold19123	109742	110930	30	29	29	\	88
110	1	51601318	51651317	Piétrain	scaffold12595	357903	359089	24	25	23	\	72
110	1	51601318	51651317	Rongchang	scaffold14315	176565	177765	45	11	22	2	80
110	1	51601318	51651317	Tibetan wild boar	scaffold20058.2	652079	652984	7	0	\	0	7
110	1	51601318	51651317	Tibetan wild boar	scaffold20058.2	660435	661635	30	4	\	0	34
112	1	52433844	52483843	Berkshire	scaffold6289	513304	514400	46	25	26	\	97
112	1	52433844	52483843	Bamei	scaffold51553	513057	514153	24	18	19	\	61
112	1	52433844	52483843	Hampshire	scaffold8315	280863	281956	29	34	23	\	86
112	1	52433844	52483843	Jinhua	scaffold35871	512403	513492	47	37	21	\	105
112	1	52433844	52483843	Landrace	scaffold36517	511663	512767	44	25	12	\	81
112	1	52433844	52483843	Large White	scaffold28031.6	714338	715974	0	0	0	7	7
112	1	52433844	52483843	Large White	scaffold28031.6	718283	718888	0	1	1	3	5
112	1	52433844	52483843	Large White	scaffold28031.6	723598	724707	33	20	32	1	86
112	1	52433844	52483843	Meishan	scaffold50679.2	172170	173275	35	26	37	\	98
112	1	52433844	52483843	Piétrain	scaffold36665	511391	512497	17	25	24	\	66
112	1	52433844	52483843	Rongchang	scaffold53037	513188	514293	28	10	25	6	69
112	1	52433844	52483843	Tibetan wild boar	scaffold19701	515033	516150	19	7	\	2	28
114	1	53232379	53282378	Berkshire	scaffold37145.1	12257	13585	67	26	51	\	144
114	1	53232379	53282378	Berkshire	scaffold37145.1	15446	15988	0	8	10	\	18
114	1	53232379	53282378	Berkshire	scaffold37145.1	16031	18852	0	21	76	\	97
114	1	53232379	53282378	Bamei	scaffold12913	13541	14592	23	25	26	\	74
114	1	53232379	53282378	Bamei	scaffold12913	16268	16779	0	12	7	\	19
114	1	53232379	53282378	Bamei	scaffold12913	16841	19652	1	21	50	\	72
114	1	53232379	53282378	Hampshire	scaffold34367.1	12608	13712	40	38	22	\	100
114	1	53232379	53282378	Hampshire	scaffold34367.1	15511	16052	0	12	12	\	24
114	1	53232379	53282378	Hampshire	scaffold34367.1	16114	18950	0	34	61	\	95
114	1	53232379	53282378	Jinhua	scaffold21411	819503	822316	0	38	38	\	76
114	1	53232379	53282378	Jinhua	scaffold21411	822376	822913	0	8	21	\	29
114	1	53232379	53282378	Jinhua	scaffold21411	824803	825852	51	25	31	\	107
114	1	53232379	53282378	Landrace	scaffold39349.1	12426	13550	46	22	17	\	85
114	1	53232379	53282378	Landrace	scaffold39349.1	15413	15924	0	9	8	\	17
114	1	53232379	53282378	Landrace	scaffold39349.1	16004	18825	1	27	51	\	79
114	1	53232379	53282378	Large White	scaffold28031.5	1332334	1333409	0	0	1	6	7
114	1	53232379	53282378	Large White	scaffold28031.5	1333663	1334259	0	2	0	6	8
114	1	53232379	53282378	Large White	scaffold28031.5	1335120	1337939	1	17	58	15	91
114	1	53232379	53282378	Large White	scaffold28031.5	1338000	1338529	0	13	9	0	22
114	1	53232379	53282378	Large White	scaffold28031.5	1340428	1341478	34	19	33	5	91
114	1	53232379	53282378	Meishan	scaffold52431.1	12494	13527	33	21	20	\	74
114	1	53232379	53282378	Meishan	scaffold52431.1	15470	15972	0	10	9	\	19
114	1	53232379	53282378	Meishan	scaffold52431.1	16038	18853	0	24	55	\	79
114	1	53232379	53282378	Piétrain	scaffold35965	12244	13524	35	26	23	\	84
114	1	53232379	53282378	Piétrain	scaffold35965	15535	16082	0	9	9	\	18
114	1	53232379	53282378	Piétrain	scaffold35965	16131	18964	0	30	75	\	105
114	1	53232379	53282378	Rongchang	scaffold54101.2	1806695	1807743	0	0	0	6	6
114	1	53232379	53282378	Rongchang	scaffold54101.2	1809543	1812353	0	22	37	9	68
114	1	53232379	53282378	Rongchang	scaffold54101.2	1812418	1812925	0	5	15	0	20
114	1	53232379	53282378	Rongchang	scaffold54101.2	1814862	1815977	34	11	11	8	64
114	1	53232379	53282378	Tibetan wild boar	scaffold20848	12463	13544	19	5	\	0	24
114	1	53232379	53282378	Tibetan wild boar	scaffold20848	15392	15938	0	3	\	4	7
114	1	53232379	53282378	Tibetan wild boar	scaffold20848	15991	18810	0	0	\	6	6
114	1	53232379	53282378	Tibetan wild boar	scaffold20848	20543	21627	0	0	\	5	5
115	1	53442278	53492277	Berkshire	scaffold37145.1	64748	67892	0	33	49	\	82
115	1	53442278	53492277	Berkshire	scaffold37145.1	67903	69603	16	15	27	\	58
115	1	53442278	53492277	Berkshire	scaffold37145.1	69611	71205	85	10	25	\	120
115	1	53442278	53492277	Bamei	scaffold12913	65790	68923	0	40	58	\	98
115	1	53442278	53492277	Bamei	scaffold12913	68928	70618	8	30	21	\	59
115	1	53442278	53492277	Bamei	scaffold12913	70639	72236	35	8	2	\	45
115	1	53442278	53492277	Hampshire	scaffold34367.1	64827	67962	0	57	60	\	117
115	1	53442278	53492277	Hampshire	scaffold34367.1	67988	69684	14	34	23	\	71
115	1	53442278	53492277	Hampshire	scaffold34367.1	69777	70886	30	19	22	\	71
115	1	53442278	53492277	Jinhua	scaffold21411	767640	768829	47	2	1	\	50
115	1	53442278	53492277	Jinhua	scaffold21411	768842	770532	4	38	24	\	66
115	1	53442278	53492277	Jinhua	scaffold21411	770553	773695	0	47	70	\	117
115	1	53442278	53492277	Landrace	scaffold39349.1	64638	69496	8	70	49	\	127
115	1	53442278	53492277	Landrace	scaffold39349.1	69505	70674	43	1	11	\	55
115	1	53442278	53492277	Large White	scaffold28031.5	1282807	1284403	60	11	4	7	82
115	1	53442278	53492277	Large White	scaffold28031.5	1284410	1286101	12	21	29	10	72
115	1	53442278	53492277	Large White	scaffold28031.5	1286119	1289256	0	33	59	12	104
115	1	53442278	53492277	Large White	scaffold28031.5	1289841	1292254	0	0	0	7	7
115	1	53442278	53492277	Meishan	scaffold52431.1	64602	67747	0	31	55	\	86
115	1	53442278	53492277	Meishan	scaffold52431.1	67757	69451	8	32	17	\	57
115	1	53442278	53492277	Meishan	scaffold52431.1	69469	71064	60	1	0	\	61
115	1	53442278	53492277	Piétrain	scaffold22481.1	12864	17695	2	92	93	\	187
115	1	53442278	53492277	Piétrain	scaffold22481.1	17715	19282	32	12	28	\	72
115	1	53442278	53492277	Rongchang	scaffold54101.2	1757583	1758783	36	8	1	0	45
115	1	53442278	53492277	Rongchang	scaffold54101.2	1758795	1760481	5	12	8	7	32
115	1	53442278	53492277	Rongchang	scaffold54101.2	1760488	1763614	0	28	36	2	66
115	1	53442278	53492277	Tibetan wild boar	scaffold20848	65274	70132	4	9	\	6	19
115	1	53442278	53492277	Tibetan wild boar	scaffold20848	70138	71736	36	6	\	4	46
119	1	54586482	54636481	Berkshire	scaffold853	100224	100810	14	5	7	\	26
119	1	54586482	54636481	Bamei	scaffold12913	991734	992324	7	6	7	\	20
119	1	54586482	54636481	Hampshire	scaffold34367.1	992973	993562	13	15	7	\	35
119	1	54586482	54636481	Jinhua	scaffold45445	205022	205617	13	9	6	\	28
119	1	54586482	54636481	Landrace	scaffold39349.1	995300	995892	13	4	2	\	19
119	1	54586482	54636481	Meishan	scaffold52431.2	301916	302507	10	3	4	\	17
119	1	54586482	54636481	Piétrain	scaffold22481.3	784482	785071	7	8	3	\	18
119	1	54586482	54636481	Rongchang	scaffold54101.2	832580	833173	10	7	4	1	22
119	1	54586482	54636481	Tibetan wild boar	scaffold19245	730787	731585	4	5	\	2	11
120	1	54772663	54822662	Berkshire	scaffold853	278482	280189	82	42	68	\	192
120	1	54772663	54822662	Berkshire	scaffold853	280701	282048	0	30	38	\	68
120	1	54772663	54822662	Berkshire	scaffold853	282220	283234	0	17	29	\	46
120	1	54772663	54822662	Bamei	scaffold26215	412721	413576	0	14	27	\	41
120	1	54772663	54822662	Bamei	scaffold26215	413767	415104	0	35	30	\	65
120	1	54772663	54822662	Bamei	scaffold26215	415329	417099	35	45	36	\	116
120	1	54772663	54822662	Hampshire	scaffold34367.1	1170775	1172549	63	47	31	\	141
120	1	54772663	54822662	Hampshire	scaffold34367.1	1172766	1174104	0	38	30	\	68
120	1	54772663	54822662	Hampshire	scaffold34367.1	1174277	1175142	0	29	17	\	46
120	1	54772663	54822662	Jinhua	scaffold21411	780957	782120	0	4	0	\	4
120	1	54772663	54822662	Jinhua	scaffold45445	21991	22874	0	19	15	\	34
120	1	54772663	54822662	Jinhua	scaffold45445	23058	24384	0	29	24	\	53
120	1	54772663	54822662	Jinhua	scaffold45445	24619	26395	72	40	31	\	143
120	1	54772663	54822662	Landrace	scaffold39349.1	1173662	1175433	77	25	35	\	137
120	1	54772663	54822662	Landrace	scaffold39349.1	1175670	1176994	0	20	12	\	32
120	1	54772663	54822662	Landrace	scaffold39349.1	1177188	1178033	0	16	3	\	19
120	1	54772663	54822662	Landrace	scaffold455672	317	950	0	7	3	\	10
120	1	54772663	54822662	Large White	scaffold28031.5	178756	179419	0	9	16	1	26
120	1	54772663	54822662	Large White	scaffold28031.5	179594	180928	0	25	32	13	70
120	1	54772663	54822662	Large White	scaffold28031.5	181152	182925	56	23	48	7	134
120	1	54772663	54822662	Meishan	scaffold52431.2	480734	482502	50	39	46	\	135
120	1	54772663	54822662	Meishan	scaffold52431.2	482735	484063	0	24	23	\	47
120	1	54772663	54822662	Meishan	scaffold52431.2	484239	485130	0	11	18	\	29
120	1	54772663	54822662	Meishan	scaffold652618	141	901	0	6	9	\	15
120	1	54772663	54822662	Piétrain	scaffold22481.3	962296	964076	31	63	35	\	129
120	1	54772663	54822662	Piétrain	scaffold22481.3	964299	965622	0	47	24	\	71
120	1	54772663	54822662	Piétrain	scaffold22481.3	965805	966673	0	14	18	\	32
120	1	54772663	54822662	Piétrain	scaffold424449	308	959	0	6	11	\	17
120	1	54772663	54822662	Rongchang	scaffold54101.2	649069	649926	0	11	14	1	26
120	1	54772663	54822662	Rongchang	scaffold54101.2	650135	651463	0	17	20	6	43
120	1	54772663	54822662	Rongchang	scaffold54101.2	651699	653474	60	13	27	4	104
120	1	54772663	54822662	Tibetan wild boar	scaffold19245	908579	910357	33	4	\	2	39
120	1	54772663	54822662	Tibetan wild boar	scaffold19245	910584	911915	0	11	\	0	11
120	1	54772663	54822662	Tibetan wild boar	scaffold19245	912087	912973	0	4	\	2	6
122	1	56578513	56628512	Tibetan wild boar	scaffold15596	7901	10369	0	0	\	4	4
123	1	57123368	57173367	Piétrain	scaffold13171	1474702	1478163	0	0	4	\	4
125	1	61249967	61299966	Tibetan wild boar	scaffold20222.1	1335331	1340781	0	0	\	4	4
129	1	63750443	63800442	Landrace	scaffold39293.2	1686337	1686993	0	8	3	\	11
129	1	63750443	63800442	Large White	scaffold3127.1	2177783	2178463	0	7	9	3	19
130	1	63878274	63928273	Berkshire	scaffold23917	1738868	1740337	0	3	2	\	5
130	1	63878274	63928273	Berkshire	scaffold37311.2	1334547	1335080	0	3	1	\	4
130	1	63878274	63928273	Berkshire	scaffold37311.2	1386864	1387732	0	0	19	\	19
130	1	63878274	63928273	Berkshire	scaffold37311.2	1387742	1388297	0	6	20	\	26
130	1	63878274	63928273	Berkshire	scaffold37311.2	1388663	1389884	0	23	12	\	35
130	1	63878274	63928273	Berkshire	scaffold37311.2	1410348	1411053	0	5	13	\	18
130	1	63878274	63928273	Bamei	scaffold41205.1	1224028	1224687	0	8	8	\	16
130	1	63878274	63928273	Bamei	scaffold41205.1	1245236	1246287	0	23	11	\	34
130	1	63878274	63928273	Bamei	scaffold41205.1	1246820	1247384	0	2	19	\	21
130	1	63878274	63928273	Bamei	scaffold41205.1	1247388	1248251	0	0	13	\	13
130	1	63878274	63928273	Hampshire	scaffold31117.3	852131	853568	0	30	45	\	75
130	1	63878274	63928273	Hampshire	scaffold31117.3	853926	855159	0	27	9	\	36
130	1	63878274	63928273	Hampshire	scaffold31117.3	875681	876356	0	19	12	\	31
130	1	63878274	63928273	Jinhua	scaffold34151	321522	322201	0	14	9	\	23
130	1	63878274	63928273	Jinhua	scaffold34151	342384	343731	0	44	14	\	58
130	1	63878274	63928273	Jinhua	scaffold34151	344080	344635	0	6	19	\	25
130	1	63878274	63928273	Jinhua	scaffold34151	344649	345552	0	0	14	\	14
130	1	63878274	63928273	Jinhua	scaffold526926	32	753	0	0	6	\	6
130	1	63878274	63928273	Landrace	scaffold39293.2	1663076	1663945	0	1	20	\	21
130	1	63878274	63928273	Landrace	scaffold39293.2	1663954	1664515	0	9	5	\	14
130	1	63878274	63928273	Landrace	scaffold39293.2	1664863	1666104	0	23	7	\	30
130	1	63878274	63928273	Large White	scaffold3127.1	2149578	2150982	0	0	0	7	7
130	1	63878274	63928273	Large White	scaffold3127.1	2152087	2153236	0	0	0	13	13
130	1	63878274	63928273	Large White	scaffold3127.1	2154384	2155256	0	3	30	0	33
130	1	63878274	63928273	Large White	scaffold3127.1	2155262	2155822	0	6	15	0	21
130	1	63878274	63928273	Large White	scaffold3127.1	2156157	2157417	0	20	8	0	28
130	1	63878274	63928273	Large White	scaffold3127.1	2172437	2173180	0	0	2	3	5
130	1	63878274	63928273	Large White	scaffold37977.3	789627	791095	0	0	4	0	4
130	1	63878274	63928273	Meishan	scaffold51939	1796346	1797211	0	0	13	\	13
130	1	63878274	63928273	Meishan	scaffold51939	1797219	1797780	0	0	10	\	10
130	1	63878274	63928273	Meishan	scaffold51939	1798136	1799379	0	26	17	\	43
130	1	63878274	63928273	Meishan	scaffold51939	1819995	1820665	0	14	13	\	27
130	1	63878274	63928273	Piétrain	scaffold36831	2175735	2176251	0	9	0	\	9
130	1	63878274	63928273	Piétrain	scaffold36831	2228450	2229313	0	1	25	\	26
130	1	63878274	63928273	Piétrain	scaffold36831	2229327	2229882	0	11	16	\	27
130	1	63878274	63928273	Piétrain	scaffold36831	2230265	2231467	0	42	5	\	47
130	1	63878274	63928273	Piétrain	scaffold36831	2251768	2252458	0	11	13	\	24
130	1	63878274	63928273	Rongchang	scaffold52561	867219	868083	0	3	6	0	9
130	1	63878274	63928273	Rongchang	scaffold52561	868094	868653	0	3	10	0	13
130	1	63878274	63928273	Rongchang	scaffold52561	868988	870352	0	17	3	0	20
130	1	63878274	63928273	Rongchang	scaffold52561	890930	891616	0	6	4	7	17
130	1	63878274	63928273	Tibetan wild boar	scaffold18579.1	373316	374576	0	6	\	0	6
130	1	63878274	63928273	Tibetan wild boar	scaffold18579.1	378803	379709	0	0	\	6	6
131	1	64423540	64473539	Berkshire	scaffold37311.2	1843205	1843895	0	15	14	\	29
131	1	64423540	64473539	Bamei	scaffold41205.1	789652	790326	0	8	7	\	15
131	1	64423540	64473539	Hampshire	scaffold31117.3	1308413	1309073	0	7	14	\	21
131	1	64423540	64473539	Jinhua	scaffold30021	89483	90167	0	10	7	\	17
131	1	64423540	64473539	Landrace	scaffold39293.2	2118954	2119635	0	12	13	\	25
131	1	64423540	64473539	Large White	scaffold3127.1	2610798	2611487	0	7	4	0	11
131	1	64423540	64473539	Large White	scaffold3127.1	2619980	2620975	0	0	0	4	4
131	1	64423540	64473539	Meishan	scaffold51939	2253970	2254658	0	3	11	\	14
131	1	64423540	64473539	Piétrain	scaffold36831	2684829	2685502	0	16	6	\	22
131	1	64423540	64473539	Rongchang	scaffold54257	1107241	1108244	0	0	1	3	4
131	1	64423540	64473539	Rongchang	scaffold54257	1118096	1118788	0	6	5	0	11
132	1	64850529	64900528	Berkshire	scaffold37311.2	2167049	2167630	23	21	16	\	60
132	1	64850529	64900528	Berkshire	scaffold37311.2	2168678	2169252	28	21	31	\	80
132	1	64850529	64900528	Bamei	scaffold41205.1	465086	465667	15	14	21	\	50
132	1	64850529	64900528	Bamei	scaffold41205.1	466699	467282	13	12	12	\	37
132	1	64850529	64900528	Hampshire	scaffold31117.3	1632501	1633075	13	17	12	\	42
132	1	64850529	64900528	Hampshire	scaffold31117.3	1634121	1634711	32	29	36	\	97
132	1	64850529	64900528	Jinhua	scaffold30021	413021	413581	14	13	12	\	39
132	1	64850529	64900528	Jinhua	scaffold30021	414675	415279	39	31	20	\	90
132	1	64850529	64900528	Landrace	scaffold39293.2	2443067	2443806	31	13	14	\	58
132	1	64850529	64900528	Landrace	scaffold39293.2	2444686	2445280	20	17	17	\	54
132	1	64850529	64900528	Large White	scaffold3127.1	2934462	2934993	13	8	17	0	38
132	1	64850529	64900528	Large White	scaffold3127.1	2936058	2936645	27	18	21	5	71
132	1	64850529	64900528	Meishan	scaffold52631	312024	312580	16	7	14	\	37
132	1	64850529	64900528	Meishan	scaffold52631	313632	314225	28	13	26	\	67
132	1	64850529	64900528	Piétrain	scaffold36831	3009819	3010532	34	25	31	\	90
132	1	64850529	64900528	Piétrain	scaffold36831	3011428	3011985	19	22	20	\	61
132	1	64850529	64900528	Rongchang	scaffold54257	791369	791960	13	11	18	3	45
132	1	64850529	64900528	Rongchang	scaffold54257	792998	793558	9	5	14	0	28
132	1	64850529	64900528	Tibetan wild boar	scaffold9082.1	419916	420520	14	8	\	3	25
132	1	64850529	64900528	Tibetan wild boar	scaffold9082.1	421535	422139	19	14	\	1	34
134	1	66846716	66896715	Berkshire	scaffold33827	103928	105488	77	2	0	\	79
134	1	66846716	66896715	Berkshire	scaffold33827	105726	107456	2	40	17	\	59
134	1	66846716	66896715	Berkshire	scaffold33827	107481	109209	0	30	37	\	67
134	1	66846716	66896715	Berkshire	scaffold33827	90036	94225	0	44	58	\	102
134	1	66846716	66896715	Berkshire	scaffold33827	94357	95085	0	6	12	\	18
134	1	66846716	66896715	Berkshire	scaffold33827	95590	99040	7	59	93	\	159
134	1	66846716	66896715	Berkshire	scaffold33827	99098	100574	84	3	1	\	88
134	1	66846716	66896715	Bamei	scaffold52825.2	577028	581189	0	46	47	\	93
134	1	66846716	66896715	Bamei	scaffold52825.2	581332	582103	0	11	22	\	33
134	1	66846716	66896715	Bamei	scaffold52825.2	582293	585767	0	66	116	\	182
134	1	66846716	66896715	Bamei	scaffold52825.2	585800	587280	25	2	1	\	28
134	1	66846716	66896715	Bamei	scaffold52825.2	590628	592183	31	2	0	\	33
134	1	66846716	66896715	Bamei	scaffold52825.2	592415	594164	1	52	21	\	74
134	1	66846716	66896715	Bamei	scaffold52825.2	594173	595895	0	18	53	\	71
134	1	66846716	66896715	Hampshire	scaffold27047.1	103503	105066	55	3	0	\	58
134	1	66846716	66896715	Hampshire	scaffold27047.1	105287	108731	7	91	43	\	141
134	1	66846716	66896715	Hampshire	scaffold27047.1	89904	94081	0	46	44	\	90
134	1	66846716	66896715	Hampshire	scaffold27047.1	94213	94982	0	17	37	\	54
134	1	66846716	66896715	Hampshire	scaffold27047.1	95167	98602	2	103	70	\	175
134	1	66846716	66896715	Hampshire	scaffold27047.1	98672	100164	63	0	2	\	65
134	1	66846716	66896715	Jinhua	scaffold9095.1	1053427	1057608	0	56	66	\	122
134	1	66846716	66896715	Jinhua	scaffold9095.1	1057743	1058510	0	17	34	\	51
134	1	66846716	66896715	Jinhua	scaffold9095.1	1058710	1062138	4	81	90	\	175
134	1	66846716	66896715	Jinhua	scaffold9095.1	1062212	1063702	55	5	0	\	60
134	1	66846716	66896715	Jinhua	scaffold9095.1	1067034	1068582	75	3	0	\	78
134	1	66846716	66896715	Jinhua	scaffold9095.1	1068827	1072290	0	63	61	\	124
134	1	66846716	66896715	Landrace	scaffold39545.2	602514	604232	0	25	37	\	62
134	1	66846716	66896715	Landrace	scaffold39545.2	604245	605988	2	24	1	\	27
134	1	66846716	66896715	Landrace	scaffold39545.2	606214	607775	63	0	0	\	63
134	1	66846716	66896715	Landrace	scaffold39545.2	611126	612601	71	2	0	\	73
134	1	66846716	66896715	Landrace	scaffold39545.2	612669	616114	3	71	68	\	142
134	1	66846716	66896715	Landrace	scaffold39545.2	616794	617509	0	13	18	\	31
134	1	66846716	66896715	Landrace	scaffold39545.2	617648	621831	0	33	36	\	69
134	1	66846716	66896715	Large White	scaffold3127.1	4782891	4787063	0	31	63	35	129
134	1	66846716	66896715	Large White	scaffold3127.1	4787208	4787970	0	6	20	8	34
134	1	66846716	66896715	Large White	scaffold3127.1	4788173	4791590	2	47	86	13	148
134	1	66846716	66896715	Large White	scaffold3127.1	4791668	4793157	71	1	0	6	78
134	1	66846716	66896715	Large White	scaffold3127.1	4796498	4798064	55	0	2	0	57
134	1	66846716	66896715	Large White	scaffold3127.1	4798291	4800021	3	21	3	0	27
134	1	66846716	66896715	Large White	scaffold3127.1	4800044	4801749	0	32	39	0	71
134	1	66846716	66896715	Large White	scaffold3127.1	4804312	4805627	0	0	0	9	9
134	1	66846716	66896715	Large White	scaffold3127.1	4806528	4809601	0	0	0	6	6
134	1	66846716	66896715	Meishan	scaffold51463.2	101687	102446	0	13	18	\	31
134	1	66846716	66896715	Meishan	scaffold51463.2	102578	106770	0	27	46	\	73
134	1	66846716	66896715	Meishan	scaffold51463.2	87870	89600	0	32	46	\	78
134	1	66846716	66896715	Meishan	scaffold51463.2	89614	91365	0	34	8	\	42
134	1	66846716	66896715	Meishan	scaffold51463.2	91605	93145	54	2	0	\	56
134	1	66846716	66896715	Meishan	scaffold51463.2	96501	97981	63	0	0	\	63
134	1	66846716	66896715	Meishan	scaffold51463.2	98049	101495	0	73	89	\	162
134	1	66846716	66896715	Piétrain	scaffold36327.2	1003994	1005541	36	0	1	\	37
134	1	66846716	66896715	Piétrain	scaffold36327.2	1005767	1007506	0	57	16	\	73
134	1	66846716	66896715	Piétrain	scaffold36327.2	1007533	1009255	0	47	50	\	97
134	1	66846716	66896715	Piétrain	scaffold36327.2	990372	994562	0	41	76	\	117
134	1	66846716	66896715	Piétrain	scaffold36327.2	994697	995461	0	17	38	\	55
134	1	66846716	66896715	Piétrain	scaffold36327.2	995642	999085	0	116	68	\	184
134	1	66846716	66896715	Piétrain	scaffold36327.2	999157	1000640	54	0	0	\	54
134	1	66846716	66896715	Rongchang	scaffold53995.3	539049	543229	0	13	32	13	58
134	1	66846716	66896715	Rongchang	scaffold53995.3	543361	544131	0	8	17	2	27
134	1	66846716	66896715	Rongchang	scaffold53995.3	544328	547778	2	47	54	9	112
134	1	66846716	66896715	Rongchang	scaffold53995.3	547821	549313	59	0	0	0	59
134	1	66846716	66896715	Rongchang	scaffold53995.3	552657	554190	54	0	1	0	55
134	1	66846716	66896715	Rongchang	scaffold53995.3	554431	557925	1	29	28	0	58
134	1	66846716	66896715	Rongchang	scaffold53995.3	560495	561813	0	0	0	5	5
134	1	66846716	66896715	Rongchang	scaffold53995.3	561981	562501	0	0	0	12	12
134	1	66846716	66896715	Tibetan wild boar	scaffold9082.2	102771	104257	35	4	\	0	39
134	1	66846716	66896715	Tibetan wild boar	scaffold9082.2	107587	109161	35	1	\	0	36
134	1	66846716	66896715	Tibetan wild boar	scaffold9082.2	109380	112857	0	22	\	0	22
134	1	66846716	66896715	Tibetan wild boar	scaffold9082.2	115404	116734	0	0	\	4	4
134	1	66846716	66896715	Tibetan wild boar	scaffold9082.2	93987	98184	0	15	\	16	31
134	1	66846716	66896715	Tibetan wild boar	scaffold9082.2	98314	99086	0	4	\	1	5
134	1	66846716	66896715	Tibetan wild boar	scaffold9082.2	99266	102723	0	8	\	2	10
135	1	66996281	67046280	Berkshire	scaffold33827	164071	164894	0	6	8	\	14
135	1	66996281	67046280	Berkshire	scaffold33827	165568	169269	86	87	102	\	275
135	1	66996281	67046280	Berkshire	scaffold457322	314	1160	0	4	12	\	16
135	1	66996281	67046280	Bamei	scaffold52825.2	650187	651035	0	10	16	\	26
135	1	66996281	67046280	Bamei	scaffold52825.2	651664	655398	45	76	108	\	229
135	1	66996281	67046280	Hampshire	scaffold27047.1	163023	163870	0	12	22	\	34
135	1	66996281	67046280	Hampshire	scaffold27047.1	164544	168235	67	118	84	\	269
135	1	66996281	67046280	Jinhua	scaffold9095.1	1126488	1127334	0	11	19	\	30
135	1	66996281	67046280	Jinhua	scaffold9095.1	1127997	1131703	88	82	69	\	239
135	1	66996281	67046280	Landrace	scaffold39545.2	542492	546206	86	86	63	\	235
135	1	66996281	67046280	Landrace	scaffold39545.2	546848	547704	0	14	17	\	31
135	1	66996281	67046280	Large White	scaffold3127.1	4809738	4812903	0	0	0	6	6
135	1	66996281	67046280	Large White	scaffold3127.1	4855990	4856836	0	14	28	2	44
135	1	66996281	67046280	Large White	scaffold3127.1	4857483	4861190	89	65	105	6	265
135	1	66996281	67046280	Meishan	scaffold51463.2	28349	32074	30	56	81	\	167
135	1	66996281	67046280	Meishan	scaffold51463.2	32701	33528	0	12	19	\	31
135	1	66996281	67046280	Meishan	scaffold682705	10	1154	17	8	18	\	43
135	1	66996281	67046280	Piétrain	scaffold36327.2	1063686	1064523	0	15	17	\	32
135	1	66996281	67046280	Piétrain	scaffold36327.2	1065151	1068884	55	126	91	\	272
135	1	66996281	67046280	Rongchang	scaffold53995.3	612205	613047	0	6	8	1	15
135	1	66996281	67046280	Rongchang	scaffold53995.3	613704	617408	65	45	56	3	169
135	1	66996281	67046280	Tibetan wild boar	scaffold9082.2	170413	174145	34	13	\	3	50
138	1	68932376	68982375	Berkshire	scaffold30797.2	244100	245487	0	2	32	\	34
138	1	68932376	68982375	Berkshire	scaffold30797.2	245498	250428	75	76	74	\	225
138	1	68932376	68982375	Bamei	scaffold7585.3	1240118	1245061	35	64	90	\	189
138	1	68932376	68982375	Bamei	scaffold7585.3	1245086	1246450	0	0	18	\	18
138	1	68932376	68982375	Hampshire	scaffold7245	586983	593318	57	97	82	\	236
138	1	68932376	68982375	Jinhua	scaffold6683.2	2042375	2048716	58	88	120	\	266
138	1	68932376	68982375	Landrace	scaffold20265.2	493192	499548	61	72	75	\	208
138	1	68932376	68982375	Large White	scaffold3127.2	1051228	1052631	0	4	27	2	33
138	1	68932376	68982375	Large White	scaffold3127.2	1052634	1057086	67	60	53	13	193
138	1	68932376	68982375	Meishan	scaffold10575	173048	179386	62	87	70	\	219
138	1	68932376	68982375	Piétrain	scaffold23455	115816	122173	32	115	82	\	229
138	1	68932376	68982375	Rongchang	scaffold53995.3	1935941	1942291	52	39	63	11	165
138	1	68932376	68982375	Tibetan wild boar	scaffold20356	161317	167698	39	20	\	4	63
139	1	69490289	69540288	Jinhua	scaffold19775	38178	41727	0	0	4	\	4
139	1	69490289	69540288	Large White	scaffold3127.2	1511696	1512204	23	8	7	2	40
139	1	69490289	69540288	Rongchang	scaffold53995.3	2395869	2396375	13	8	3	5	29
139	1	69490289	69540288	Tibetan wild boar	scaffold16362.1	273167	273671	12	7	\	0	19
139	1	69490289	69540288	Tibetan wild boar	scaffold19857	1284660	1285449	0	0	\	4	4
140	1	69833495	69883494	Berkshire	scaffold30797.2	986054	986694	0	4	14	\	18
140	1	69833495	69883494	Berkshire	scaffold30797.2	986698	989029	14	26	23	\	63
140	1	69833495	69883494	Bamei	scaffold7585.3	470090	473071	6	33	44	\	83
140	1	69833495	69883494	Hampshire	scaffold7245	1290572	1291317	0	0	10	\	10
140	1	69833495	69883494	Hampshire	scaffold7245	1360766	1363736	10	49	46	\	105
140	1	69833495	69883494	Jinhua	scaffold6683.2	1271323	1274307	6	48	34	\	88
140	1	69833495	69883494	Landrace	scaffold20265.2	1196427	1197190	0	0	9	\	9
140	1	69833495	69883494	Landrace	scaffold20265.2	1234110	1237089	11	28	21	\	60
140	1	69833495	69883494	Large White	scaffold3127.2	1755626	1756370	0	0	9	4	13
140	1	69833495	69883494	Large White	scaffold3127.2	1778059	1778627	0	0	0	4	4
140	1	69833495	69883494	Large White	scaffold3127.2	1778720	1779801	0	0	0	6	6
140	1	69833495	69883494	Large White	scaffold519687	2323	3732	8	13	22	4	47
140	1	69833495	69883494	Large White	scaffold519793	2317	3895	0	20	28	3	51
140	1	69833495	69883494	Meishan	scaffold30577	567199	570153	4	38	38	\	80
140	1	69833495	69883494	Piétrain	scaffold19247	520843	521583	0	0	6	\	6
140	1	69833495	69883494	Piétrain	scaffold19247	590789	593753	3	60	27	\	90
140	1	69833495	69883494	Rongchang	scaffold53995.3	2640063	2640777	0	0	6	7	13
140	1	69833495	69883494	Rongchang	scaffold53995.3	2711286	2714263	6	23	20	3	52
140	1	69833495	69883494	Tibetan wild boar	scaffold16362.2	108358	111353	12	4	\	4	20
141	1	70078222	70128221	Berkshire	scaffold30797.2	1186349	1188180	60	12	34	\	106
141	1	70078222	70128221	Berkshire	scaffold30797.2	1188410	1190525	0	56	40	\	96
141	1	70078222	70128221	Berkshire	scaffold30797.2	1190728	1191645	0	10	25	\	35
[truncated: 93,742 more rows]
