# Supplementary material for: Comprehensive variation discovery and recovery of missing sequence in the pig genome using multiple de novo assemblies
Source: HighWire-hosted journal article supplement (doi:10.1101/gr.207456.116), 2016-09-19
Supplement: Supplemental_Table_S19.xlsx [file Supplemental_Table_S19.xlsx]

## Sheet: Supplemental Table S19
Supplemental Table S19. List and annotation of inter-assemblies collinear missing genes of the ten assemblies.
In total of 74 well-known fat deposition genes (Supplemental ref. 148) and 76 immunity-related genes (annotated with the GO: 0002376; immune system process) are indicated by solid circle (●). These fat deposition genes are mainly involved in energy homeostasis, muscle growth and adipose deposition, as well as cytokines and hormones in regulating food intake. These immunity-related genes participa…
The longest gene model	Number of assemblies shared with the collinear orthologous genes	Immunity-related genes	Obesity-related genes	Large White	Berkshire	Bamei	Hampshire	Jinhua	Landrace	Meishan	Piétrain	Rongchang	Tibetan wild boar	Pig gene symbol	Pig (GI #）	Human gene symbol	Human (GI #）	Mouse gene symbol	Mouse (GI #）	Cow gene symbol	Cow (GI #）	KEGG	Swissport	TrEMBL	InterPro	GO
BKGENE02892	1	●	●	\	BKGENE02892	\	\	\	\	\	\	\	\	CFH	47523636	CFH	62739186	Cfh	109627652	CFH	76677897	CFH, HF1; complement factor H (EC:4.2.1.2); K04004 complement factor H	Complement factor H OS=Bos taurus GN=CFH PE=1 SV=3	Q8MI72_PIG Complement regulator factor H (Precursor) OS=Sus scrofa GN=FH PE=2 SV=1	IPR000436:Sushi/SCR/CCP	\
RCGENE08028	10	●	●	LWGENE18314	BKGENE13038	BMGENE12991	HAGENE05905	JHGENE01027	LAGENE04725	MSGENE01960	PIGENE19999	RCGENE08028	TPGENE16246	PKNOX2	335309209	PKNOX1	28866955	Pknox1	568999426	PKNOX1	114052336	homeobox protein Meis2-like; K16670 homeobox protein Meis2	Homeobox protein PKNOX1 OS=Bos taurus GN=PKNOX1 PE=2 SV=1	M3TYS7_PIG PBX/knotted 1 homeobox 1 OS=Sus scrofa GN=PKNOX1 PE=2 SV=1	IPR001356:Homeobox domain;IPR008422:Homeobox KN domain	GO:0001525:pbx knotted 1 homeobox 1;GO:0003677:DNA binding; Molecular Function;GO:0003700:sequence-specific DNA binding transcription factor activity; Molecular Function;GO:0003705:pbx knotted 1 homeobox 1;GO:0005667:pbx knotted 1 homeobox 1;GO:0005737:pbx knotted 1 homeobox 1;GO:0006355:regulation of transcription, DNA-dependent; Biological Process;GO:0030217:pbx knotted 1 homeobox 1;GO:0030218:…
TPGENE09400	1	●		\	\	\	\	\	\	\	\	\	TPGENE09400	LOC100155012	335301831	RPS24	214010222	Rps24	568987091	RPS24	529010831	40S ribosomal protein S24-like; K02974 small subunit ribosomal protein S24e	40S ribosomal protein S24 OS=Takifugu rubripes GN=rps24 PE=3 SV=1	F7HA71_CALJA 40S ribosomal protein S24 OS=Callithrix jacchus GN=LOC100396617 PE=3 SV=1	IPR001976:Ribosomal protein S24e	GO:0003735:structural constituent of ribosome; Molecular Function;GO:0005622:intracellular; Cellular Component;GO:0005840:ribosome; Cellular Component;GO:0006412:translation; Biological Process;
LAGENE03127	10	●		LWGENE19977	BKGENE10634	BMGENE20067	HAGENE09465	JHGENE15007	LAGENE03127	MSGENE04520	PIGENE10057	RCGENE07147	TPGENE05422	SCARA3	335300974	COLEC12	18641360	Colec12	165932373	COLEC12	156120335	COLEC12; collectin sub-family member 12; K10062 collectin sub-family member 12	Collectin-12 OS=Homo sapiens GN=COLEC12 PE=1 SV=3	K9J4M9_PIG Collectin sub-family member 12 OS=Sus scrofa GN=COLEC12 PE=2 SV=1	IPR001304:C-type lectin;IPR008160:Collagen triple helix repeat	GO:0030246:carbohydrate binding; Molecular Function;
PIGENE10738	10	●		LWGENE11938	BKGENE10603	BMGENE03218	HAGENE14944	JHGENE17115	LAGENE12754	MSGENE17965	PIGENE10738	RCGENE13867	TPGENE02226	LRRC1	335292043	SCRIB	355390315	Scrib	568990942	SCRIB	741949528	SCRIB; scribbled planar cell polarity protein; K16175 protein scribble	Protein scribble homolog OS=Mus musculus GN=Scrib PE=1 SV=2	F1N0Y1_BOVIN Uncharacterized protein OS=Bos taurus GN=LOC100295316 PE=4 SV=2	IPR001478:PDZ domain;IPR001611:Leucine-rich repeat;IPR003591:Leucine-rich repeat, typical subtype;IPR025875:Leucine rich repeat 4	GO:0001843:protein scribble homolog isoform 2;GO:0001921:protein scribble homolog isoform 2;GO:0005515:protein binding; Molecular Function;GO:0005913:protein scribble homolog isoform 2;GO:0008105:protein scribble homolog isoform 2;GO:0008283:protein scribble homolog isoform 2;GO:0016080:protein scribble homolog isoform 2;GO:0016323:protein scribble homolog isoform 2;GO:0016337:protein scribble ho…
TPGENE12222	10	●		LWGENE01760	BKGENE00456	BMGENE12188	HAGENE06493	JHGENE13394	LAGENE10866	MSGENE04550	PIGENE07837	RCGENE10643	TPGENE12222	TROVE2	545851894	TROVE2	578801392	Trove2	7305523	TROVE2	329664058	TROVE2; TROVE domain family, member 2; K11089 60 kDa SS-A/Ro ribonucleoprotein	60 kDa SS-A/Ro ribonucleoprotein OS=Homo sapiens GN=TROVE2 PE=1 SV=2	L8II60_BOSMU 60 kDa SS-A/Ro ribonucleoprotein (Fragment) OS=Bos grunniens mutus GN=M91_18563 PE=4 SV=1	IPR008858:TROVE	GO:0003723:RNA binding; Molecular Function;GO:0030529:ribonucleoprotein complex; Cellular Component;
BMGENE09203	10	●		LWGENE15722	BKGENE05927	BMGENE09203	HAGENE15321	JHGENE15462	LAGENE13822	MSGENE10082	PIGENE02269	RCGENE03382	TPGENE18964	ZFPM2	305855204	ZFPM1	767989498	Zfpm1	6677633	ZFPM1	528991326	ZFPM1; zinc finger protein, FOG family member 1; K17441 zinc finger protein ZFPM1	Zinc finger protein ZFPM1 OS=Mus musculus GN=Zfpm1 PE=1 SV=1	F1N6T0_BOVIN Uncharacterized protein (Fragment) OS=Bos taurus GN=ZFPM1 PE=4 SV=1	IPR007087:Zinc finger, C2H2;IPR015880:Zinc finger, C2H2-like	GO:0046872:metal ion binding; Molecular Function;
TPGENE01475	5		●	LWGENE01515	BKGENE20185	\	\	JHGENE03665	\	\	PIGENE12791	\	TPGENE01475	CYP3A46	198282077	CYP3A4	13435386	Cyp3a13	6681115	CYP3A4	150247092	cytochrome P450 3A29-like; K07424 cytochrome P450, family 3, subfamily A [EC:1.14.14.1]	Cytochrome P450 3A29 OS=Sus scrofa GN=CYP3A29 PE=2 SV=1	A6BM01_BALAC Cytochrome 3A72 OS=Balaenoptera acutorostrata GN=CYP3A72 PE=2 SV=1	IPR001128:Cytochrome P450;IPR002401:Cytochrome P450, E-class, group I	GO:0005506:iron ion binding; Molecular Function;GO:0009055:electron carrier activity; Molecular Function;GO:0016705:oxidoreductase activity, acting on paired donors, with incorporation or reduction of molecular oxygen; Molecular Function;GO:0016712:cytochrome 3a72;GO:0020037:heme binding; Molecular Function;GO:0055114:oxidation-reduction process; Biological Process;
LWGENE01410	10		●	LWGENE01410	BKGENE07807	BMGENE06924	HAGENE16929	JHGENE17666	LAGENE06831	MSGENE00165	PIGENE04372	RCGENE09710	TPGENE15235	GDF15	291291599	GDF15	153792495	Gdf15	170784848	GDF15	329664989	GDF15; growth differentiation factor 15; K05504 growth differentiation factor 15	Growth/differentiation factor 15 OS=Homo sapiens GN=GDF15 PE=1 SV=3	D3Y269_PIG Growth differentiation factor 15 OS=Sus scrofa GN=GDF15 PE=2 SV=1	IPR001839:Transforming growth factor-beta, C-terminal;IPR015615:Transforming growth factor-beta-related	GO:0008083:growth factor activity; Molecular Function;
BMGENE07313	10		●	LWGENE13952	BKGENE12517	BMGENE07313	HAGENE02523	JHGENE15581	LAGENE09313	MSGENE14997	PIGENE02331	RCGENE17372	TPGENE08826	G6PD	545887655	H6PD	543583768	H6pd	31982147	H6PD	528916847	H6PD; hexose-6-phosphate dehydrogenase (glucose 1-dehydrogenase); K13937 hexose-6-phosphate dehydrogenase [EC:1.1.1.47 3.1.1.31]	GDH/6PGL endoplasmic bifunctional protein OS=Homo sapiens GN=H6PD PE=1 SV=2	K9IVK1_PIG Hexose-6-phosphate dehydrogenase (Glucose 1-dehydrogenase) OS=Sus scrofa GN=H6PD PE=2 SV=1	IPR001282:Glucose-6-phosphate dehydrogenase;IPR006148:Glucosamine/galactosamine-6-phosphate isomerase;IPR022674:Glucose-6-phosphate dehydrogenase, NAD-binding;IPR022675:Glucose-6-phosphate dehydrogenase, C-terminal	GO:0004345:glucose-6-phosphate dehydrogenase activity; Molecular Function;GO:0005975:carbohydrate metabolic process; Biological Process;GO:0006006:glucose metabolic process; Biological Process;GO:0050661:NADP binding; Molecular Function;GO:0055114:oxidation-reduction process; Biological Process;
LWGENE15682	10		●	LWGENE15682	BKGENE05967	BMGENE03209	HAGENE15281	JHGENE04809	LAGENE03627	MSGENE03601	PIGENE05681	RCGENE01095	TPGENE15735	\	\	MLYCD	110349750	Mlycd	56797739	MLYCD	149642931	MLYCD; malonyl-CoA decarboxylase (EC:4.1.1.9); K01578 malonyl-CoA decarboxylase [EC:4.1.1.9]	Malonyl-CoA decarboxylase, mitochondrial OS=Homo sapiens GN=MLYCD PE=1 SV=3	D2D0E6_PIG Malonyl-CoA decarboxylase OS=Sus scrofa GN=MLYCD PE=4 SV=1	IPR007956:Malonyl-CoA decarboxylase	GO:0006633:fatty acid biosynthetic process; Biological Process;GO:0050080:malonyl-CoA decarboxylase activity; Molecular Function;
PIGENE06231	8		●	LWGENE06746	BKGENE03413	BMGENE06044	\	JHGENE05888	LAGENE13709	\	PIGENE06231	RCGENE05117	TPGENE05769	MOGAT2	264681458	MOGAT2	37537527	Mogat2	28974982	LOC785379	119925522	MOGAT2; monoacylglycerol O-acyltransferase 2 (EC:2.3.1.22); K14457 2-acylglycerol O-acyltransferase 2 [EC:2.3.1.22]	2-acylglycerol O-acyltransferase 2 OS=Mus musculus GN=Mogat2 PE=1 SV=1	F1SUM0_PIG Uncharacterized protein OS=Sus scrofa GN=MOGAT2 PE=4 SV=2	IPR007130:Diacylglycerol acyltransferase	GO:0005783:2-acylglycerol o-acyltransferase 2;GO:0006651:2-acylglycerol o-acyltransferase 2;GO:0016407:2-acylglycerol o-acyltransferase 2;GO:0016747:transferase activity, transferring acyl groups other than amino-acyl groups; Molecular Function;GO:0050892:2-acylglycerol o-acyltransferase 2;
RCGENE12872	10		●	LWGENE01258	BKGENE16905	BMGENE13365	HAGENE14869	JHGENE09155	LAGENE05793	MSGENE13819	PIGENE02568	RCGENE12872	TPGENE11965	RXRG	194332487	RXRA	4506755	Rxra	755497255	RXRA	528970635	RXRA; retinoid X receptor, alpha; K08524 retinoid X receptor alpha	Retinoic acid receptor RXR-alpha OS=Mus musculus GN=Rxra PE=1 SV=1	M3YL73_MUSPF Uncharacterized protein OS=Mustela putorius furo GN=Rxra PE=3 SV=1	IPR000003:Retinoid X receptor/HNF4;IPR000536:Nuclear hormone receptor, ligand-binding, core;IPR001628:Zinc finger, nuclear hormone receptor-type;IPR001723:Steroid hormone receptor;IPR021780:Nuclear/hormone receptor activator site AF-1	GO:0003677:DNA binding; Molecular Function;GO:0003700:sequence-specific DNA binding transcription factor activity; Molecular Function;GO:0003707:steroid hormone receptor activity; Molecular Function;GO:0005634:nucleus; Cellular Component;GO:0006355:regulation of transcription, DNA-dependent; Biological Process;GO:0008270:zinc ion binding; Molecular Function;GO:0043401:steroid hormone mediated sig…
LWGENE12581	10		●	LWGENE12581	BKGENE09966	BMGENE02008	HAGENE00851	JHGENE03913	LAGENE05992	MSGENE03542	PIGENE07875	RCGENE18462	TPGENE16081	LMOD2	311275511	LMOD1	112380630	Lmod1	134948541	LOC101909470	528929900	TMOD2; tropomodulin 2 (neuronal); K10370 tropomodulin	Leiomodin-1 OS=Homo sapiens GN=LMOD1 PE=1 SV=3	I0FQL5_MACMU Leiomodin-1 OS=Macaca mulatta GN=LMOD1 PE=2 SV=1	IPR004934:Tropomodulin	GO:0005523:tropomyosin binding; Molecular Function;GO:0005856:cytoskeleton; Cellular Component;
BKGENE05106	10			LWGENE14008	BKGENE05106	BMGENE15493	HAGENE18396	JHGENE16150	LAGENE15789	MSGENE16289	PIGENE01085	RCGENE07257	TPGENE12688	SKIL	545864659	SKI	4506967	Ski	113205055	SKI	741954809	\	Ski oncogene OS=Equus caballus GN=SKI PE=2 SV=1	B1AUF1_MOUSE Ski oncogene OS=Mus musculus GN=Ski PE=4 SV=1	IPR003380:Transforming protein Ski;IPR014890:c-SKI SMAD4-binding domain;IPR023216:Transcription regulator SKI/SnoN	GO:0000122:ski oncogene;GO:0000166:ski oncogene;GO:0001843:ski oncogene;GO:0002089:ski oncogene;GO:0003682:ski oncogene;GO:0003714:ski oncogene;GO:0005634:nucleus; Cellular Component;GO:0005667:ski oncogene;GO:0005737:ski oncogene;GO:0008270:ski oncogene;GO:0009948:ski oncogene;GO:0010626:ski oncogene;GO:0014902:ski oncogene;GO:0016605:ski oncogene;GO:0017053:ski oncogene;GO:0019901:ski oncogene;…
BKGENE05671	1			\	BKGENE05671	\	\	\	\	\	\	\	\	C7H15orf42	545894659	TICRR	808688280	Ticrr	78354983	TICRR	528999045	\	Treslin OS=Homo sapiens GN=TICRR PE=1 SV=2	E1BPF2_BOVIN Uncharacterized protein OS=Bos taurus GN=TICRR PE=4 SV=2	IPR026153:Treslin	GO:0003682:tpa: leucine-rich repeat kinase 1-like;GO:0005634:nucleus; Cellular Component;GO:0006260:DNA replication; Biological Process;GO:0010212:response to ionizing radiation; Biological Process;GO:0030174:tpa: leucine-rich repeat kinase 1-like;GO:0031576:tpa: leucine-rich repeat kinase 1-like;GO:0033314:mitotic DNA replication checkpoint; Biological Process;
BKGENE14287	1			\	BKGENE14287	\	\	\	\	\	\	\	\	LOC102161685	545866143	LOC105372315	768005480	Gm29779	755511141	\	\	\	Envelope glycoprotein OS=Gibbon ape leukemia virus GN=env PE=2 SV=2	A8NC06_PIG Envelope glycoprotein OS=Sus scrofa PE=4 SV=1	IPR018154:TLV/ENV coat polyprotein	\
BMGENE03092	1			\	\	BMGENE03092	\	\	\	\	\	\	\	LOC102161224	545828218	CFAP54	767893613	Cfap54	755535734	CFAP54	741926974	\	Putative uncharacterized protein C12orf63 OS=Homo sapiens GN=C12orf63 PE=2 SV=2	L5MAZ8_MYODS Uncharacterized protein OS=Myotis davidii GN=MDA_GLEAN10016083 PE=4 SV=1	\	\
BMGENE05061	1			\	\	BMGENE05061	\	\	\	\	\	\	\	\	\	ARMCX4	609876456	Armcx4	569011211	ARMCX4	741982060	\	Armadillo repeat-containing X-linked protein 4 OS=Homo sapiens GN=ARMCX4 PE=2 SV=2	F8W8Y7_HUMAN Armadillo repeat-containing X-linked protein 4 OS=Homo sapiens GN=ARMCX4 PE=2 SV=2	\	\
BMGENE07068	1			\	\	BMGENE07068	\	\	\	\	\	\	\	\	\	CCDC134	530420388	Ccdc134	755552292	CCDC134	528951583	\	Coiled-coil domain-containing protein 134 OS=Rattus norvegicus GN=Ccdc134 PE=2 SV=1	L5K8X9_PTEAL Coiled-coil domain-containing protein 134 OS=Pteropus alecto GN=PAL_GLEAN10007218 PE=4 SV=1	IPR026321:Coiled-coil domain-containing protein 134	\
BMGENE13617	1			\	\	BMGENE13617	\	\	\	\	\	\	\	\	\	C17orf99	530411268	6030468B19Rik	568976414	\	\	\	Uncharacterized protein C17orf99 OS=Homo sapiens GN=C17orf99 PE=1 SV=2	F1P6Z5_CANFA Uncharacterized protein (Fragment) OS=Canis familiaris GN=C17orf99 PE=4 SV=2	\	\
HAGENE16365	10			LWGENE11234	BKGENE10285	BMGENE09791	HAGENE16365	JHGENE11202	LAGENE10605	MSGENE16006	PIGENE02099	RCGENE11089	TPGENE03797	LOC100517101	335290531	PRAME	768046463	Gm13043	88853565	LOC100849084	741906468	\	Melanoma antigen preferentially expressed in tumors OS=Homo sapiens GN=PRAME PE=1 SV=1	G3MXF9_BOVIN Uncharacterized protein (Fragment) OS=Bos taurus GN=LOC100849792 PE=4 SV=1	IPR026292:PRAME family/Leucine-rich repeat-containing protein 14	GO:0008284:tpa: preferentially expressed antigen in melanoma-like;GO:0042974:tpa: preferentially expressed antigen in melanoma-like;GO:0043066:tpa: preferentially expressed antigen in melanoma-like;GO:0045596:tpa: preferentially expressed antigen in melanoma-like;GO:0045892:tpa: preferentially expressed antigen in melanoma-like;GO:0048387:tpa: preferentially expressed antigen in melanoma-like;
JHGENE12888	1			\	\	\	\	JHGENE12888	\	\	\	\	\	C7H15orf42	545894659	TICRR	808688280	Ticrr	78354983	TICRR	528999045	\	Treslin OS=Homo sapiens GN=TICRR PE=1 SV=2	E1BPF2_BOVIN Uncharacterized protein OS=Bos taurus GN=TICRR PE=4 SV=2	IPR026153:Treslin	GO:0003682:tpa: leucine-rich repeat kinase 1-like;GO:0005634:nucleus; Cellular Component;GO:0006260:DNA replication; Biological Process;GO:0010212:response to ionizing radiation; Biological Process;GO:0030174:tpa: leucine-rich repeat kinase 1-like;GO:0031576:tpa: leucine-rich repeat kinase 1-like;GO:0033314:mitotic DNA replication checkpoint; Biological Process;
LAGENE20277	10			LWGENE20150	BKGENE15935	BMGENE17618	HAGENE15619	JHGENE16046	LAGENE20277	MSGENE20381	PIGENE20317	RCGENE05697	TPGENE20316	\	\	\	\	\	\	\	\	\	Uncharacterized protein CXorf67 OS=Homo sapiens GN=CXorf67 PE=2 SV=1	F1RUK0_PIG Uncharacterized protein OS=Sus scrofa PE=4 SV=1	\	\
LWGENE07931	9			LWGENE07931	BKGENE04716	BMGENE04435	HAGENE09792	JHGENE05457	LAGENE20070	MSGENE13604	PIGENE08597	RCGENE19981	\	LOC100738952	350581600	GSG1L	767988306	Gsg1l	568950771	GSG1L	741974491	\	Germ cell-specific gene 1-like protein OS=Homo sapiens GN=GSG1L PE=2 SV=2	H2NQH5_PONAB Uncharacterized protein OS=Pongo abelii GN=GSG1L PE=4 SV=2	IPR012478:GSG1-like	\
LWGENE10012	10			LWGENE10012	BKGENE19811	BMGENE06241	HAGENE08712	JHGENE02545	LAGENE07817	MSGENE09791	PIGENE10329	RCGENE19837	TPGENE13229	\	\	SAYSD1	755573646	Saysd1	218751888	SAYSD1	84000427	\	SAYSvFN domain-containing protein 1 OS=Homo sapiens GN=SAYSD1 PE=2 SV=1	F6ZLP9_MONDO Uncharacterized protein (Fragment) OS=Monodelphis domestica GN=SAYSD1 PE=4 SV=1	IPR019387:Uncharacterised domain SAYSvFN	\
LWGENE13362	10			LWGENE13362	BKGENE10202	BMGENE16327	HAGENE04463	JHGENE12278	LAGENE07115	MSGENE14298	PIGENE05549	RCGENE07839	TPGENE03810	DEPDC1B	350594337	DEPDC1	166295188	Depdc1a	285401815	DEPDC1	297473075	\	DEP domain-containing protein 1A OS=Homo sapiens GN=DEPDC1 PE=1 SV=2	G1L0Q0_AILME Uncharacterized protein OS=Ailuropoda melanoleuca GN=LOC100469692 PE=4 SV=1	IPR000591:DEP domain	GO:0035556:intracellular signal transduction; Biological Process;
MSGENE10503	1			\	\	\	\	\	\	MSGENE10503	\	\	\	C7H15orf42	545894659	TICRR	808688280	Ticrr	78354983	TICRR	528999045	\	Treslin OS=Homo sapiens GN=TICRR PE=1 SV=2	E1BPF2_BOVIN Uncharacterized protein OS=Bos taurus GN=TICRR PE=4 SV=2	IPR026153:Treslin	GO:0003682:tpa: leucine-rich repeat kinase 1-like;GO:0005634:nucleus; Cellular Component;GO:0006260:DNA replication; Biological Process;GO:0010212:response to ionizing radiation; Biological Process;GO:0030174:tpa: leucine-rich repeat kinase 1-like;GO:0031576:tpa: leucine-rich repeat kinase 1-like;GO:0033314:mitotic DNA replication checkpoint; Biological Process;
MSGENE18718	1			\	\	\	\	\	\	MSGENE18718	\	\	\	\	\	CFAP54	767893615	Cfap54	755535734	CFAP54	741926980	\	Putative uncharacterized protein C12orf63 OS=Homo sapiens GN=C12orf63 PE=2 SV=2	H2Q6N6_PANTR Uncharacterized protein OS=Pan troglodytes GN=LOC452148 PE=4 SV=1	\	\
PIGENE09149	1			\	\	\	\	\	\	\	PIGENE09149	\	\	C7H15orf42	545894659	TICRR	808688280	Ticrr	78354983	TICRR	528999045	\	Treslin OS=Homo sapiens GN=TICRR PE=1 SV=2	E1BPF2_BOVIN Uncharacterized protein OS=Bos taurus GN=TICRR PE=4 SV=2	IPR026153:Treslin	GO:0003682:tpa: leucine-rich repeat kinase 1-like;GO:0005634:nucleus; Cellular Component;GO:0006260:DNA replication; Biological Process;GO:0010212:response to ionizing radiation; Biological Process;GO:0030174:tpa: leucine-rich repeat kinase 1-like;GO:0031576:tpa: leucine-rich repeat kinase 1-like;GO:0033314:mitotic DNA replication checkpoint; Biological Process;
RCGENE12924	9			LWGENE01315	BKGENE20342	BMGENE13889	HAGENE20311	JHGENE20269	LAGENE02485	MSGENE13938	PIGENE16523	RCGENE12924	\	\	\	SAPCD2	190886454	Sapcd2	594150359	SAPCD2	528970693	\	Suppressor APC domain-containing protein 2 OS=Mus musculus PE=2 SV=1	I3MG38_SPETR Uncharacterized protein OS=Spermophilus tridecemlineatus GN=SAPCD2 PE=4 SV=1	IPR026828:Suppressor APC domain-containing protein 1/2;IPR026831:Adenomatous polyposis coli domain	\
RCGENE15698	10			LWGENE15402	BKGENE11041	BMGENE16338	HAGENE14144	JHGENE08575	LAGENE08713	MSGENE10722	PIGENE14394	RCGENE15698	TPGENE02819	LOC102164929	545816217	\	\	\	\	LOC101903343	741882275	\	Spermatogenesis-associated protein 31A7 OS=Homo sapiens GN=SPATA31A7 PE=2 SV=4	L5JVE6_PTEAL Uncharacterized protein OS=Pteropus alecto GN=PAL_GLEAN10003511 PE=4 SV=1	IPR027970:Domain of unknown function DUF4599	\
TPGENE07488	1			\	\	\	\	\	\	\	\	\	TPGENE07488	LOC102161224	545828218	CFAP54	767893598	Cfap54	755535734	CFAP54	741926980	\	Putative uncharacterized protein C12orf63 OS=Homo sapiens GN=C12orf63 PE=2 SV=2	H2Q6N6_PANTR Uncharacterized protein OS=Pan troglodytes GN=LOC452148 PE=4 SV=1	\	\
TPGENE15737	10			LWGENE15684	BKGENE05965	BMGENE16369	HAGENE15283	JHGENE04811	LAGENE03629	MSGENE03599	PIGENE05683	RCGENE01097	TPGENE15737	NECAB1	545821041	NECAB2	767990027	Necab2	16905129	NECAB2	741957850	\	N-terminal EF-hand calcium-binding protein 2 OS=Homo sapiens GN=NECAB2 PE=1 SV=1	H0X0A0_OTOGA Uncharacterized protein (Fragment) OS=Otolemur garnettii GN=NECAB2 PE=4 SV=1	IPR002048:EF-hand domain;IPR007138:Antibiotic biosynthesis monooxygenase	GO:0005509:calcium ion binding; Molecular Function;
TPGENE15791	10			LWGENE03188	BKGENE04256	BMGENE18098	HAGENE18303	JHGENE18267	LAGENE09636	MSGENE08250	PIGENE18547	RCGENE09145	TPGENE15791	\	\	BEND3	767943295	Bend3	568965475	BEND3	741937649	\	BEN domain-containing protein 3 OS=Homo sapiens GN=BEND3 PE=1 SV=1	G1LN37_AILME Uncharacterized protein OS=Ailuropoda melanoleuca GN=BEND3 PE=4 SV=1	IPR018379:BEN domain	\
HAGENE07377	10			LWGENE07709	BKGENE08992	BMGENE19353	HAGENE07377	JHGENE14420	LAGENE03784	MSGENE17402	PIGENE01635	RCGENE04066	TPGENE17962	\	\	ASMTL	530423013	1810009N02Rik	21729757	ASMTL	78050073	1810009N02Rik; RIKEN cDNA 1810009N02 gene; K06287 septum formation protein	N-acetylserotonin O-methyltransferase-like protein OS=Homo sapiens GN=ASMTL PE=1 SV=3	M3XQ49_MUSPF Uncharacterized protein OS=Mustela putorius furo GN=ASMTL PE=3 SV=1	IPR001077:O-methyltransferase, family 2;IPR003697:Maf-like protein	GO:0005737:cytoplasm; Cellular Component;GO:0008171:O-methyltransferase activity; Molecular Function;
LAGENE05774	1			\	\	\	\	\	LAGENE05774	\	\	\	\	A	47523246	ABO	58331216	Abo	568914572	ABO	528912276	A; blood group A transferase-like; K00709 histo-blood group ABO system transferase [EC:2.4.1.40 2.4.1.37]	Histo-blood group ABO system transferase 1 OS=Rattus norvegicus GN=Abo PE=1 SV=1	F8QQE6_PIG UDP-GalNAc transferase O (Fragment) OS=Sus scrofa PE=4 SV=1	IPR005076:Glycosyl transferase, family 6	GO:0005975:carbohydrate metabolic process; Biological Process;GO:0016020:membrane; Cellular Component;GO:0016758:transferase activity, transferring hexosyl groups; Molecular Function;
RCGENE09219	1			\	\	\	\	\	\	\	\	RCGENE09219	\	A	47523246	ABO	58331216	Abo	224967118	ABO	118151396	A; blood group A transferase-like; K00709 histo-blood group ABO system transferase [EC:2.4.1.40 2.4.1.37]	Histo-blood group ABO system transferase 1 OS=Rattus norvegicus GN=Abo PE=1 SV=1	O77563_PIG Putative blood group A transferase OS=Sus scrofa GN=A PE=2 SV=1	IPR005076:Glycosyl transferase, family 6	GO:0005975:carbohydrate metabolic process; Biological Process;GO:0016020:membrane; Cellular Component;GO:0016758:transferase activity, transferring hexosyl groups; Molecular Function;
LAGENE18181	1			\	\	\	\	\	LAGENE18181	\	\	\	\	LOC100627047	335309772	ACOT2	148727286	Acot3	568978890	ACOT2	528967118	ACOT2; acyl-CoA thioesterase 2; K01068 acyl-coenzyme A thioesterase 1/2/4 [EC:3.1.2.2]	Acyl-coenzyme A thioesterase 2, mitochondrial OS=Homo sapiens GN=ACOT2 PE=1 SV=6	B3KSA0_HUMAN Acyl-coenzyme A thioesterase 2, mitochondrial OS=Homo sapiens GN=ACOT2 PE=2 SV=1	IPR014940:BAAT/Acyl-CoA thioester hydrolase C-terminal	GO:0000038:unnamed protein product [Homo sapiens];GO:0001676:unnamed protein product [Homo sapiens];GO:0004091:unnamed protein product [Homo sapiens];GO:0005102:unnamed protein product [Homo sapiens];GO:0005739:unnamed protein product [Homo sapiens];GO:0006637:unnamed protein product [Homo sapiens];GO:0016290:unnamed protein product [Homo sapiens];
BMGENE02758	10			LWGENE06394	BKGENE15438	BMGENE02758	HAGENE08425	JHGENE09684	LAGENE06044	MSGENE08368	PIGENE06786	RCGENE02729	TPGENE10241	FAM151B	311249779	FAM151A	194097418	Fam151a	22165388	LOC615989	76613811	acyl-coenzyme A thioesterase 11-like; K12417 acyl-CoA thioesteraes 11 [EC:3.1.2.-]	Protein FAM151A OS=Mus musculus GN=Fam151a PE=2 SV=1	F1N3E9_BOVIN Uncharacterized protein (Fragment) OS=Bos taurus GN=LOC615989 PE=4 SV=1	IPR019356:Protein of unknown function DUF2181	\
RCGENE17759	10		●	LWGENE12679	BKGENE05825	BMGENE12830	HAGENE14373	JHGENE02109	LAGENE05255	MSGENE14885	PIGENE10823	RCGENE17759	TPGENE00916	ALPK2	545802035	ALPK3	115511036	Alpk3	117938324	ALPK3	741966567	ALPK3; alpha-kinase 3; K08868 alpha-kinase	Alpha-protein kinase 3 OS=Homo sapiens GN=ALPK3 PE=2 SV=2	F1N5U0_BOVIN Uncharacterized protein (Fragment) OS=Bos taurus GN=ALPK3 PE=4 SV=2	IPR003598:Immunoglobulin subtype 2;IPR003599:Immunoglobulin subtype;IPR004166:MHCK/EF2 kinase;IPR007110:Immunoglobulin-like domain;IPR013098:Immunoglobulin I-set	GO:0004674:protein serine/threonine kinase activity; Molecular Function;GO:0005515:protein binding; Molecular Function;GO:0005524:ATP binding; Molecular Function;GO:0005634:low quality protein: alpha-protein kinase 3;GO:0006468:protein phosphorylation; Biological Process;GO:0007507:low quality protein: alpha-protein kinase 3;
LWGENE09928	10			LWGENE09928	BKGENE00165	BMGENE01701	HAGENE00299	JHGENE02838	LAGENE00640	MSGENE03930	PIGENE06803	RCGENE02460	TPGENE03518	ASB1	545876261	ASB12	320461689	Asb12	755565749	ASB12	741983236	ASB12; ankyrin repeat and SOCS box containing 12; K10334 ankyrin repeat and SOCS box protein 12	Ankyrin repeat and SOCS box protein 12 OS=Homo sapiens GN=ASB12 PE=1 SV=2	L5K7S3_PTEAL Ankyrin repeat and SOCS box protein 12 OS=Pteropus alecto GN=PAL_GLEAN10001370 PE=4 SV=1	IPR001496:SOCS protein, C-terminal;IPR002110:Ankyrin repeat;IPR020683:Ankyrin repeat-containing domain	GO:0005515:protein binding; Molecular Function;GO:0035556:intracellular signal transduction; Biological Process;
JHGENE12509	10			LWGENE06725	BKGENE12854	BMGENE08728	HAGENE00359	JHGENE12509	LAGENE01298	MSGENE03364	PIGENE02145	RCGENE08932	TPGENE09106	ATL1	545802394	RNF112	264681488	Rnf112	597518007	RNF112	116004499	atlastin; K17339 atlastin [EC:3.6.5.-]	RING finger protein 112 OS=Bos taurus GN=RNF112 PE=2 SV=1	J9NS88_CANFA Uncharacterized protein OS=Canis familiaris GN=RNF112 PE=4 SV=1	IPR001841:Zinc finger, RING-type;IPR015894:Guanylate-binding protein, N-terminal;IPR018957:Zinc finger, C3HC4 RING-type	GO:0003924:GTPase activity; Molecular Function;GO:0005515:protein binding; Molecular Function;GO:0005525:GTP binding; Molecular Function;GO:0008270:zinc ion binding; Molecular Function;GO:0046872:metal ion binding; Molecular Function;
JHGENE15912	8			LWGENE00033	BKGENE14947	\	HAGENE04687	JHGENE15912	\	MSGENE01545	PIGENE19887	RCGENE06097	TPGENE13552	B4GALT2	545836628	ATP6V0B	661567364	Atp6v0b	15991795	ATP6V0B	84000051	ATP6V0B; ATPase, H+ transporting, lysosomal 21kDa, V0 subunit b; K03661 V-type H+-transporting ATPase 21kDa proteolipid subunit	V-type proton ATPase 21 kDa proteolipid subunit OS=Bos taurus GN=ATP6V0B PE=2 SV=1	M7BQ37_CHEMY Beta-1,4-galactosyltransferase 2 OS=Chelonia mydas GN=UY3_08683 PE=4 SV=1	IPR000245:V-ATPase proteolipid subunit;IPR002379:V-ATPase proteolipid subunit C-like domain;IPR027995:Glycosyl transferase group 7, N-terminal	GO:0005768:v-type proton atpase 21 kda proteolipid subunit;GO:0005774:v-type proton atpase 21 kda proteolipid subunit;GO:0015078:hydrogen ion transmembrane transporter activity; Molecular Function;GO:0015991:ATP hydrolysis coupled proton transport; Biological Process;GO:0016021:v-type proton atpase 21 kda proteolipid subunit;GO:0033177:proton-transporting two-sector ATPase complex, proton-transpo…
MSGENE18479	1			\	\	\	\	\	\	MSGENE18479	\	\	\	\	\	KIAA1107	197245440	A830010M20Rik	270483722	BTBD8	741920841	BTBD8; KIAA1107 ortholog; K10480 BTB/POZ domain-containing protein 8	Uncharacterized protein KIAA1107 OS=Homo sapiens GN=KIAA1107 PE=1 SV=2	L8INJ2_BOSMU Uncharacterized protein OS=Bos grunniens mutus GN=M91_06366 PE=4 SV=1	IPR027907:Domain of unknown function DUF4596	\
TPGENE04310	10			LWGENE19248	BKGENE13252	BMGENE16101	HAGENE12831	JHGENE09789	LAGENE14181	MSGENE14203	PIGENE13131	RCGENE13122	TPGENE04310	CACNA1G	545858713	CACNA1H	53832011	Cacna1h	254826786	CACNA1H	741974083	CACNA1H; calcium channel, voltage-dependent, T type, alpha 1H subunit; K04855 voltage-dependent calcium channel T type alpha-1H	Voltage-dependent T-type calcium channel subunit alpha-1H OS=Mus musculus GN=Cacna1h PE=2 SV=3	M5FK87_BOVIN Calcium channel, voltage-dependent, T type, alpha 1H subunit OS=Bos taurus GN=CACNA1H PE=4 SV=1	IPR005445:Voltage-dependent calcium channel, T-type, alpha-1 subunit;IPR005821:Ion transport domain	GO:0005216:ion channel activity; Molecular Function;GO:0005245:voltage-gated calcium channel activity; Molecular Function;GO:0005891:voltage-gated calcium channel complex; Cellular Component;GO:0006811:ion transport; Biological Process;GO:0016020:membrane; Cellular Component;GO:0032342:tpa: calcium voltage- t alpha 1h subunit;GO:0032870:tpa: calcium voltage- t alpha 1h subunit;GO:0034651:tpa: cal…
MSGENE17081	10			LWGENE02842	BKGENE09679	BMGENE12602	HAGENE14322	JHGENE09096	LAGENE15583	MSGENE17081	PIGENE05958	RCGENE01971	TPGENE06504	CASP3	47523066	CASP7	4502581	Casp7	6680850	CASP7	297490985	CASP7; caspase 7, apoptosis-related cysteine peptidase; K04397 caspase 7 [EC:3.4.22.60]	Caspase-7 OS=Homo sapiens GN=CASP7 PE=1 SV=1	K9J6J4_PIG Caspase-7 isoform alpha OS=Sus scrofa GN=CASP7 PE=2 SV=1	IPR001309:Peptidase C14, ICE, catalytic subunit p20;IPR002138:Peptidase C14, caspase non-catalytic subunit p10;IPR002398:Peptidase C14, caspase precursor p45;IPR011600:Peptidase C14, caspase domain;IPR015471:Caspase-7;IPR015917:Peptidase C14A, caspase precursor p45, core	GO:0004197:cysteine-type endopeptidase activity; Molecular Function;GO:0005737:cytoplasm; Cellular Component;GO:0006508:proteolysis; Biological Process;GO:0006915:apoptotic process; Biological Process;GO:0008234:cysteine-type peptidase activity; Molecular Function;
MSGENE02189	10			LWGENE04587	BKGENE16620	BMGENE08333	HAGENE08524	JHGENE07946	LAGENE09437	MSGENE02189	PIGENE09989	RCGENE04028	TPGENE00994	ASGR2	545860071	CLEC2L	168229214	Clec2l	168229210	CLEC2L	741925187	CD69; CD69 molecule; K06502 CD69 antigen	C-type lectin domain family 2 member L OS=Homo sapiens GN=CLEC2L PE=2 SV=1	H9FA74_MACMU C-type lectin domain family 2 member L (Fragment) OS=Macaca mulatta GN=CLEC2L PE=2 SV=1	IPR001304:C-type lectin	GO:0030246:carbohydrate binding; Molecular Function;
HAGENE13521	10			LWGENE17880	BKGENE20160	BMGENE20342	HAGENE13521	JHGENE02758	LAGENE20126	MSGENE20256	PIGENE20185	RCGENE08797	TPGENE07996	\	\	SECTM1	767997449	Sectm1a	568972751	SECTM1A	741964477	CD7; CD7 molecule; K06457 CD7 antigen	Secreted and transmembrane protein 1 OS=Homo sapiens GN=SECTM1 PE=1 SV=2	E1BEJ1_BOVIN Uncharacterized protein OS=Bos taurus GN=SECTM1 PE=2 SV=1	\	\
BMGENE15108	10			LWGENE16566	BKGENE13766	BMGENE15108	HAGENE09150	JHGENE01059	LAGENE07591	MSGENE05789	PIGENE07181	RCGENE07354	TPGENE07712	CDH5	48976065	CDH5	166362713	Cdh5	568956047	CDH5	48675381	CDH5; cadherin 5, type 2 (vascular endothelium); K06533 cadherin 5, type 2, VE-cadherin	Cadherin-5 OS=Sus scrofa GN=CDH5 PE=2 SV=1	Q8WNW5_PIG VE cadherin OS=Sus scrofa PE=2 SV=1	IPR000233:Cadherin, cytoplasmic domain;IPR002126:Cadherin	GO:0005509:calcium ion binding; Molecular Function;GO:0005886:ve cadherin;GO:0005911:ve cadherin;GO:0007156:homophilic cell adhesion; Biological Process;GO:0016020:membrane; Cellular Component;GO:0016021:ve cadherin;GO:2000114:ve cadherin;
LWGENE01246	10			LWGENE01246	BKGENE16892	BMGENE13378	HAGENE14855	JHGENE09142	LAGENE05780	MSGENE13832	PIGENE02581	RCGENE09214	TPGENE11951	MAPK9	545811071	STKLD1	525345385	Stkld1	568913848	STKLD1	741944809	chromosome unknown open reading frame, human C9orf96; K17546 probable inactive protein kinase-like protein SgK071	Probable inactive protein kinase-like protein SgK071 OS=Homo sapiens GN=SGK071 PE=2 SV=4	G1LYW8_AILME Uncharacterized protein OS=Ailuropoda melanoleuca GN=LOC100481598 PE=4 SV=1	IPR000719:Protein kinase domain;IPR002290:Serine/threonine- / dual specificity protein kinase, catalytic domain;IPR020635:Tyrosine-protein kinase, catalytic domain	GO:0004672:protein kinase activity; Molecular Function;GO:0004713:protein tyrosine kinase activity; Molecular Function;GO:0005524:ATP binding; Molecular Function;GO:0006468:protein phosphorylation; Biological Process;
HAGENE18256	1			\	\	\	HAGENE18256	\	\	\	\	\	\	LOC100523664	545807541	OR4C46	52353949	Olfr1258	22128973	OR4C46	741891008	cOR4C43; cOR4C43 olfactory receptor family 4 subfamily C-like; K04257 olfactory receptor	Olfactory receptor 4C46 OS=Homo sapiens GN=OR4C46 PE=2 SV=1	J9P3Z3_CANFA Uncharacterized protein OS=Canis familiaris GN=cOR4C43 PE=3 SV=1	IPR000276:G protein-coupled receptor, rhodopsin-like;IPR000725:Olfactory receptor;IPR017452:GPCR, rhodopsin-like, 7TM	GO:0004930:G-protein coupled receptor activity; Molecular Function;GO:0004984:olfactory receptor activity; Molecular Function;GO:0007186:G-protein coupled receptor signaling pathway; Biological Process;GO:0016021:integral to membrane; Cellular Component;
TPGENE18957	10			LWGENE15727	BKGENE05921	BMGENE09197	HAGENE15327	JHGENE15467	LAGENE13816	MSGENE10076	PIGENE02263	RCGENE03376	TPGENE18957	\	\	CTU2	61676106	Ctu2	225735586	CTU2	78369368	CTU2; cytosolic thiouridylase subunit 2 homolog (S. pombe); K14169 cytoplasmic tRNA 2-thiolation protein 2	Cytoplasmic tRNA 2-thiolation protein 2 OS=Bos taurus GN=CTU2 PE=2 SV=1	L5JQV8_PTEAL Cytoplasmic tRNA 2-thiolation protein 2 OS=Pteropus alecto GN=PAL_GLEAN10025655 PE=4 SV=1	IPR019407:Thiouridylase, cytoplasmic, subunit 2	\
JHGENE15263	1			\	\	\	\	JHGENE15263	\	\	\	\	\	LOC100156553	545873020	DMBT1	767961863	Cd163l1	568952345	LOC101905453	741976384	deleted in malignant brain tumors 1 protein-like; K13912 deleted in malignant brain tumors 1 protein	Putative scavenger receptor cysteine-rich domain-containing protein LOC619207 OS=Homo sapiens PE=5 SV=2	K7GRA0_PIG Uncharacterized protein (Fragment) OS=Sus scrofa PE=4 SV=1	IPR001190:SRCR domain;IPR017448:Speract/scavenger receptor-related	GO:0005044:scavenger receptor activity; Molecular Function;GO:0016020:membrane; Cellular Component;
BKGENE00500	10			LWGENE17813	BKGENE00500	BMGENE13609	HAGENE12646	JHGENE02690	LAGENE11359	MSGENE06961	PIGENE00210	RCGENE19854	TPGENE12042	DNAH11	545850258	DNAH17	767996322	Dnah17	568975683	DNAH17	741964866	Dynein heavy chain family protein; K01376 [EC:3.4.22.-]	Dynein heavy chain 17, axonemal OS=Mus musculus GN=Dnah17 PE=2 SV=2	E1BLB4_BOVIN Uncharacterized protein (Fragment) OS=Bos taurus GN=LOC788092 PE=4 SV=2	IPR024317:Dynein heavy chain, P-loop containing D4 domain;IPR024743:Dynein heavy chain, coiled coil stalk;IPR026981:Dynein heavy chain 17, axonemal;IPR026983:Dynein heavy chain	GO:0001539:ciliary or bacterial-type flagellar motility; Biological Process;GO:0003777:microtubule motor activity; Molecular Function;GO:0005524:dynein heavy chain axonemal-like;GO:0005858:axonemal dynein complex; Cellular Component;GO:0007018:microtubule-based movement; Biological Process;GO:0016887:ATPase activity; Molecular Function;
BMGENE13174	10			LWGENE08390	BKGENE18597	BMGENE13174	HAGENE02913	JHGENE03693	LAGENE08228	MSGENE07390	PIGENE11572	RCGENE18715	TPGENE03830	LOC100516420	545808983	ADGRE2	768002108	Cd97	568956867	LOC100299045	741931703	EGF-like module-containing mucin-like hormone receptor-like 2-like; K08443 egf-like module containing, mucin-like, hormone receptor-like 2	EGF-like module-containing mucin-like hormone receptor-like 2 OS=Canis familiaris GN=EMR2 PE=2 SV=2	F1SCF4_PIG Uncharacterized protein (Fragment) OS=Sus scrofa GN=LOC100516420 PE=4 SV=2	IPR000203:GPS domain;IPR000742:Epidermal growth factor-like domain;IPR000832:GPCR, family 2, secretin-like;IPR001881:EGF-like calcium-binding domain;IPR003056:GPCR, family 2, CD97 antigen;IPR017981:GPCR, family 2-like	GO:0004888:transmembrane signaling receptor activity; Molecular Function;GO:0004930:G-protein coupled receptor activity; Molecular Function;GO:0005509:calcium ion binding; Molecular Function;GO:0005515:protein binding; Molecular Function;GO:0007166:cell surface receptor signaling pathway; Biological Process;GO:0007186:G-protein coupled receptor signaling pathway; Biological Process;GO:0007218:neu…
BKGENE07811	10			LWGENE01406	BKGENE07811	BMGENE06928	HAGENE16925	JHGENE17670	LAGENE06835	MSGENE00169	PIGENE04368	RCGENE09714	TPGENE15231	ELL2	350580940	ELL	5729812	Ell	124358953	ELL	300797566	ELL; elongation factor RNA polymerase II; K15183 RNA polymerase II elongation factor ELL	RNA polymerase II elongation factor ELL OS=Homo sapiens GN=ELL PE=1 SV=1	M3WC08_FELCA Uncharacterized protein OS=Felis catus GN=ELL PE=4 SV=1	IPR010844:Occludin/RNA polymerase II elongation factor, ELL domain;IPR019464:RNA polymerase II elongation factor ELL	GO:0006368:transcription elongation from RNA polymerase II promoter; Biological Process;GO:0008023:transcription elongation factor complex; Cellular Component;
BMGENE16943	10			LWGENE12194	BKGENE08785	BMGENE16943	HAGENE03641	JHGENE12267	LAGENE03410	MSGENE11398	PIGENE10218	RCGENE07579	TPGENE13324	EPHA7	350578293	EPHA10	150456460	Epha10	374093225	EPHA10	329663315	EPHA10; EPH receptor A10 (EC:2.7.10.1); K08897 Eph receptor A10 [EC:2.7.10.1]	Ephrin type-A receptor 10 OS=Homo sapiens GN=EPHA10 PE=2 SV=1	F1N6H6_BOVIN Uncharacterized protein OS=Bos taurus GN=EPHA10 PE=4 SV=2	IPR000719:Protein kinase domain;IPR001090:Ephrin receptor ligand binding domain;IPR001245:Serine-threonine/tyrosine-protein kinase catalytic domain;IPR001660:Sterile alpha motif domain;IPR002290:Serine/threonine- / dual specificity protein kinase, catalytic domain;IPR003961:Fibronectin, type III;IPR020635:Tyrosine-protein kinase, catalytic domain;IPR021129:Sterile alpha motif, type 1;IPR027936:Ep…	GO:0004672:protein kinase activity; Molecular Function;GO:0004713:protein tyrosine kinase activity; Molecular Function;GO:0005005:ephrin type-a receptor 10 precursor;GO:0005515:protein binding; Molecular Function;GO:0005524:ATP binding; Molecular Function;GO:0005887:ephrin type-a receptor 10 precursor;GO:0006468:protein phosphorylation; Biological Process;GO:0048013:ephrin receptor signaling path…
HAGENE09754	10			LWGENE16503	BKGENE16179	BMGENE15172	HAGENE09754	JHGENE17297	LAGENE07656	MSGENE05852	PIGENE07239	RCGENE07418	TPGENE07647	ESRP1	335286312	ESRP2	45935393	Esrp2	28849887	ESRP2	741958168	ESRP2; epithelial splicing regulatory protein 2; K14947 epithelial splicing regulatory protein 1/2	Epithelial splicing regulatory protein 2 OS=Mus musculus GN=Esrp2 PE=2 SV=1	M3WD85_FELCA Uncharacterized protein OS=Felis catus GN=ESRP2 PE=4 SV=1	IPR000504:RNA recognition motif domain	GO:0000166:epithelial splicing regulatory protein 2;GO:0003676:nucleic acid binding; Molecular Function;GO:0003729:epithelial splicing regulatory protein 2;GO:0005634:epithelial splicing regulatory protein 2;GO:0043484:epithelial splicing regulatory protein 2;
HAGENE16741	10			LWGENE08400	BKGENE15942	BMGENE01492	HAGENE16741	JHGENE17999	LAGENE18301	MSGENE04222	PIGENE17093	RCGENE11260	TPGENE09881	EXOC3L1	545829601	TNFAIP2	26051240	Tnfaip2	194394239	TNFAIP2	300794448	exocyst complex component 3-like; K06110 exocyst complex component 3	Tumor necrosis factor alpha-induced protein 2 OS=Mus musculus GN=Tnfaip2 PE=2 SV=2	H0XRP4_OTOGA Uncharacterized protein OS=Otolemur garnettii GN=TNFAIP2 PE=4 SV=1	IPR010326:Exocyst complex component Sec6	GO:0000145:exocyst; Cellular Component;GO:0006887:exocytosis; Biological Process;
JHGENE17998	10			LWGENE08401	BKGENE15941	BMGENE01491	HAGENE16740	JHGENE17998	LAGENE18300	MSGENE04223	PIGENE17092	RCGENE11261	TPGENE09880	EXOC3L1	311257166	EXOC3L4	117938266	Exoc3l4	575501690	EXOC3L4	329664080	exocyst complex component 3-like; K06110 exocyst complex component 3	Exocyst complex component 3-like protein 4 OS=Homo sapiens GN=EXOC3L4 PE=2 SV=2	L5JP80_PTEAL Uncharacterized protein OS=Pteropus alecto GN=PAL_GLEAN10020912 PE=4 SV=1	IPR010326:Exocyst complex component Sec6	GO:0000145:exocyst; Cellular Component;GO:0006887:exocytosis; Biological Process;
MSGENE16438	10			LWGENE06179	BKGENE16058	BMGENE03077	HAGENE17642	JHGENE03259	LAGENE02337	MSGENE16438	PIGENE06565	RCGENE12304	TPGENE00533	LOC100621997	545894484	FMN1	157168329	Fmn1	755498719	LOC100847682	359069447	FMN1; formin-1-like; K10367 formin 1	Formin-1 OS=Homo sapiens GN=FMN1 PE=1 SV=3	D2H7R1_AILME Putative uncharacterized protein (Fragment) OS=Ailuropoda melanoleuca GN=PANDA_006210 PE=4 SV=1	IPR001265:Formin homology family, Cappuccino subfamily;IPR015425:Formin, FH2 domain	GO:0003677:PREDICTED: LOW QUALITY PROTEIN: hypothetical protein LOC100057813 [Equus caballus];GO:0003779:PREDICTED: LOW QUALITY PROTEIN: hypothetical protein LOC100057813 [Equus caballus];GO:0005884:actin filament; Cellular Component;GO:0005912:PREDICTED: LOW QUALITY PROTEIN: hypothetical protein LOC100057813 [Equus caballus];GO:0010467:PREDICTED: LOW QUALITY PROTEIN: hypothetical protein LOC1000…
JHGENE13627	1			\	\	\	\	JHGENE13627	\	\	\	\	\	EMP2	350581720	PMP22	527317419	Pmp22	695130855	PMP22	741963046	GABARAP; GABA(A) receptor-associated protein; K08341 GABA(A) receptor-associated protein	Peripheral myelin protein 22 OS=Bos taurus GN=PMP22 PE=1 SV=2	C5IS97_SHEEP Peripheral myelin protein 22 OS=Ovis aries GN=PMP22 PE=2 SV=1	IPR003936:Peripheral myelin protein PMP22;IPR004031:PMP-22/EMP/MP20/Claudin superfamily;IPR004032:PMP-22/EMP/MP20	GO:0016020:membrane; Cellular Component;GO:0016021:integral to membrane; Cellular Component;
LAGENE11695	1			\	\	\	\	\	LAGENE11695	\	\	\	\	EMP2	350581720	PMP22	527317419	Pmp22	695130855	PMP22	741963046	GABARAP; GABA(A) receptor-associated protein; K08341 GABA(A) receptor-associated protein	Peripheral myelin protein 22 OS=Bos taurus GN=PMP22 PE=1 SV=2	C5IS97_SHEEP Peripheral myelin protein 22 OS=Ovis aries GN=PMP22 PE=2 SV=1	IPR003936:Peripheral myelin protein PMP22;IPR004031:PMP-22/EMP/MP20/Claudin superfamily;IPR004032:PMP-22/EMP/MP20	GO:0016020:membrane; Cellular Component;GO:0016021:integral to membrane; Cellular Component;
TPGENE02752	10			LWGENE20598	BKGENE20741	BMGENE20867	HAGENE20726	JHGENE20755	LAGENE20680	MSGENE20827	PIGENE20742	RCGENE20549	TPGENE02752	GMCL1	350582300	GMCL1	30410765	Gmcl1	160333071	LOC101908442	528934579	germ cell-less protein-like 1-like; K10485 BTB/POZ domain-containing protein 13 (germ cell-less protein-like 1)	Germ cell-less protein-like 1 OS=Homo sapiens GN=GMCL1 PE=1 SV=1	H0XQ39_OTOGA Uncharacterized protein (Fragment) OS=Otolemur garnettii PE=4 SV=1	IPR011705:BTB/Kelch-associated	\
JHGENE08319	1			\	\	\	\	JHGENE08319	\	\	\	\	\	LOC100514847	545834581	GJB4	767902361	Gjb4	755507802	GJB4	741921671	GJB4; gap junction protein, beta 4, 30.3kDa; K07623 gap junction protein, beta 4	Gap junction beta-4 protein OS=Homo sapiens GN=GJB4 PE=1 SV=1	F6S785_HORSE Gap junction protein OS=Equus caballus GN=GJB4 PE=3 SV=1	IPR000500:Connexin;IPR002271:Gap junction beta-5 protein (Cx30.3);IPR013092:Connexin, N-terminal;IPR019570:Gap junction protein, cysteine-rich domain	GO:0005922:connexon complex; Cellular Component;GO:0007154:cell communication; Biological Process;GO:0007608:gap junction beta-4;GO:0016021:gap junction beta-4;GO:0042048:gap junction beta-4;
TPGENE17306	1			\	\	\	\	\	\	\	\	\	TPGENE17306	LOC100514847	545834581	GJB4	767902361	Gjb4	755507802	GJB4	741921671	GJB4; gap junction protein, beta 4, 30.3kDa; K07623 gap junction protein, beta 4	Gap junction beta-4 protein OS=Homo sapiens GN=GJB4 PE=1 SV=1	F6S785_HORSE Gap junction protein OS=Equus caballus GN=GJB4 PE=3 SV=1	IPR000500:Connexin;IPR002271:Gap junction beta-5 protein (Cx30.3);IPR013092:Connexin, N-terminal;IPR019570:Gap junction protein, cysteine-rich domain	GO:0005922:connexon complex; Cellular Component;GO:0007154:cell communication; Biological Process;GO:0007608:gap junction beta-4;GO:0016021:gap junction beta-4;GO:0042048:gap junction beta-4;
BKGENE12132	10			LWGENE14985	BKGENE12132	BMGENE19240	HAGENE08342	JHGENE01119	LAGENE19592	MSGENE07036	PIGENE05091	RCGENE03095	TPGENE16015	RTN2	194018680	RTN2	46255005	Rtn2	7305449	RTN2	164448596	glycogen phosphorylase-like; K00688 starch phosphorylase [EC:2.4.1.1]	Reticulon-2 OS=Mus musculus GN=Rtn2 PE=1 SV=1	Q6IM67_PIG RTN2-B OS=Sus scrofa GN=RTN2 PE=2 SV=1	IPR003388:Reticulon	\
PIGENE03383	10			LWGENE09911	BKGENE07995	BMGENE13021	HAGENE18962	JHGENE17070	LAGENE00281	MSGENE01494	PIGENE03383	RCGENE12166	TPGENE16939	MORC3	311270209	MORC4	145553976	Morc4	300934866	MORC4	529014630	histone-lysine N-methyltransferase ASHH2-like; K11423 histone-lysine N-methyltransferase SETD2 [EC:2.1.1.43]	MORC family CW-type zinc finger protein 4 OS=Homo sapiens GN=MORC4 PE=1 SV=2	M3XXA8_MUSPF Uncharacterized protein OS=Mustela putorius furo GN=Morc4 PE=4 SV=1	IPR011124:Zinc finger, CW-type	GO:0008270:zinc ion binding; Molecular Function;
BMGENE16860	10			LWGENE00133	BKGENE01662	BMGENE16860	HAGENE20280	JHGENE15858	LAGENE14582	MSGENE12683	PIGENE05144	RCGENE03620	TPGENE05643	HOXC11	350584020	HOXC11	7657166	Hoxc11	67625731	HOXC11	528948526	HOXC11; homeobox C11; K09296 homeobox protein HoxA/C/D11	Homeobox protein Hox-C11 OS=Homo sapiens GN=HOXC11 PE=2 SV=1	J3KMZ0_HUMAN Homeobox protein Hox-C11 OS=Homo sapiens GN=HOXC11 PE=4 SV=1	IPR021918:Domain of unknown function DUF3528, homeobox protein, eukaryotic	\
LWGENE05277	10			LWGENE05277	BKGENE07358	BMGENE04242	HAGENE16442	JHGENE16958	LAGENE17154	MSGENE17178	PIGENE16660	RCGENE02391	TPGENE09137	\	\	METTL20	578822823	Mettl20	56711339	METTL20	741927367	hypothetical protein; K17878 nicotinamide N-methyltransferase [EC:2.1.1.1]	Methyltransferase-like protein 20 OS=Homo sapiens GN=METTL20 PE=2 SV=1	E1BH46_BOVIN Uncharacterized protein OS=Bos taurus GN=METTL20 PE=4 SV=1	IPR019410:Nicotinamide N-methyltransferase-like	\
MSGENE13911	10			LWGENE01287	BKGENE16933	BMGENE13861	HAGENE14896	JHGENE09179	LAGENE02460	MSGENE13911	PIGENE16496	RCGENE12896	TPGENE11242	SEC16A	545894842	SEC16A	767958869	Sec16a	568913421	SEC16A	528970477	INPP5E; inositol polyphosphate-5-phosphatase, 72 kDa; K01099 phosphatidylinositol-bisphosphatase [EC:3.1.3.36]	Protein transport protein Sec16A OS=Homo sapiens GN=SEC16A PE=1 SV=3	M3VHA5_PIG SEC16-like A OS=Sus scrofa GN=SEC16A PE=2 SV=1	IPR000300:Inositol polyphosphate-related phosphatase;IPR024340:Sec16, central conserved domain;IPR024880:COPII coat assembly protein, Sec16	GO:0046856:phosphatidylinositol dephosphorylation; Biological Process;GO:0048208:COPII vesicle coating; Biological Process;
PIGENE13456	1			\	\	\	\	\	\	\	PIGENE13456	\	\	\	\	\	\	Krt78	568992745	LOC790744	741911497	Krt78, Kb40; keratin 78; K07605 type II keratin, basic	S-antigen protein OS=Plasmodium falciparum (isolate FC27 / Papua New Guinea) PE=4 SV=1	G3IAB3_CRIGR Putative uncharacterized protein OS=Cricetulus griseus GN=I79_020533 PE=4 SV=1	\	\
LAGENE07371	10			LWGENE17481	BKGENE08287	BMGENE18704	HAGENE02104	JHGENE18542	LAGENE07371	MSGENE03999	PIGENE13237	RCGENE08296	TPGENE06173	LOC100739192	545835297	LAMA5	21264602	Lama5	124487155	LAMA5	741948507	LAMA5; laminin, alpha 5; K06240 laminin, alpha 3/5	Laminin subunit alpha-5 OS=Homo sapiens GN=LAMA5 PE=1 SV=8	F1MC13_BOVIN Uncharacterized protein (Fragment) OS=Bos taurus GN=LAMA5 PE=4 SV=2	IPR000034:Laminin B type IV;IPR000742:Epidermal growth factor-like domain;IPR001791:Laminin G domain;IPR002049:EGF-like, laminin;IPR008211:Laminin, N-terminal;IPR009254:Laminin I;IPR010307:Laminin II;IPR018031:Laminin B, subgroup	GO:0001658:low quality protein: laminin subunit alpha-5;GO:0001738:low quality protein: laminin subunit alpha-5;GO:0001755:low quality protein: laminin subunit alpha-5;GO:0001942:low quality protein: laminin subunit alpha-5;GO:0005102:receptor binding; Molecular Function;GO:0005178:low quality protein: laminin subunit alpha-5;GO:0005515:protein binding; Molecular Function;GO:0005604:basement memb…
LAGENE20573	9			LWGENE20390	BKGENE20747	\	HAGENE20737	JHGENE10199	LAGENE20573	MSGENE20538	PIGENE04885	RCGENE20399	TPGENE19984	CYP4F2	311249181	CYP4F2	13435391	Cyp4f15	568998489	LOC100295883	297476368	leukotriene-B(4) omega-hydroxylase 1-like; K17726 leukotriene-B4 20-monooxygenase [EC:1.14.13.30]	Leukotriene-B(4) omega-hydroxylase 1 OS=Homo sapiens GN=CYP4F2 PE=1 SV=1	F1S9Z9_PIG Uncharacterized protein (Fragment) OS=Sus scrofa GN=CYP4F2 PE=3 SV=2	IPR001128:Cytochrome P450;IPR002401:Cytochrome P450, E-class, group I	GO:0005506:iron ion binding; Molecular Function;GO:0009055:electron carrier activity; Molecular Function;GO:0016705:oxidoreductase activity, acting on paired donors, with incorporation or reduction of molecular oxygen; Molecular Function;GO:0020037:heme binding; Molecular Function;GO:0055114:oxidation-reduction process; Biological Process;
TPGENE16866	10			LWGENE17759	BKGENE18135	BMGENE13666	HAGENE12591	JHGENE03740	LAGENE11414	MSGENE10402	PIGENE00266	RCGENE01651	TPGENE16866	STXBP5	350578077	LLGL2	62739161	Llgl2	568973444	LLGL2	149773552	LLGL2; lethal giant larvae homolog 2 (Drosophila); K06094 lethal(2) giant larvae protein	Lethal(2) giant larvae protein homolog 2 OS=Homo sapiens GN=LLGL2 PE=1 SV=2	L5KLE1_PTEAL Lethal(2) giant larvae protein like protein 2 OS=Pteropus alecto GN=PAL_GLEAN10014724 PE=4 SV=1	IPR000664:Lethal(2) giant larvae protein;IPR001680:WD40 repeat;IPR013577:Lethal giant larvae homologue 2	GO:0005515:protein binding; Molecular Function;
MSGENE09763	10			LWGENE08080	BKGENE08191	BMGENE18786	HAGENE07360	JHGENE02583	LAGENE12363	MSGENE09763	PIGENE11845	RCGENE13892	TPGENE08357	\	\	PSCA	289547757	Psca	21312316	PSCA	528975384	lymphocyte antigen 6E-like; K06846 lymphocyte antigen 6 complex	Prostate stem cell antigen OS=Mus musculus GN=Psca PE=2 SV=1	F7ILP9_CALJA Uncharacterized protein OS=Callithrix jacchus GN=LY6K PE=4 SV=1	IPR001526:CD59 antigen;IPR016054:Ly-6 antigen / uPA receptor -like	\
TPGENE13197	1			\	\	\	\	\	\	\	\	\	TPGENE13197	MMP19	335288059	MMP28	767995865	Mmp28	755537153	MMP28	741962291	MMP28; matrix metallopeptidase 28; K08006 matrix metalloproteinase-28 (epilysin) [EC:3.4.24.-]	Matrix metalloproteinase-28 OS=Homo sapiens GN=MMP28 PE=2 SV=2	C0H5X0_HUMAN MMP28 protein OS=Homo sapiens GN=MMP28 PE=2 SV=1	IPR001818:Peptidase M10, metallopeptidase;IPR002477:Peptidoglycan binding-like;IPR006026:Peptidase, metallopeptidase;IPR021190:Peptidase M10A	GO:0004222:metalloendopeptidase activity; Molecular Function;GO:0005509:mmp28 protein;GO:0005578:mmp28 protein;GO:0006508:proteolysis; Biological Process;GO:0008237:metallopeptidase activity; Molecular Function;GO:0008270:zinc ion binding; Molecular Function;GO:0031012:extracellular matrix; Cellular Component;
LAGENE17552	1			\	\	\	\	\	LAGENE17552	\	\	\	\	OTOG	335282166	MUC5AC	748983076	Muc5ac	568952672	MUC5AC	741980838	MUC5AC; mucin 5AC, oligomeric mucus/gel-forming; K13908 mucin-5B	Mucin-5AC (Fragments) OS=Homo sapiens GN=MUC5AC PE=1 SV=3	O97867_PIG Gastric mucin (Fragment) OS=Sus scrofa domesticus GN=MUC5AC PE=2 SV=1	IPR001007:von Willebrand factor, type C;IPR001846:von Willebrand factor, type D domain;IPR006207:Cystine knot, C-terminal;IPR014853:Uncharacterised domain, cysteine-rich	GO:0005515:protein binding; Molecular Function;
LWGENE16435	10			LWGENE16435	BKGENE16987	BMGENE00146	HAGENE03170	JHGENE17968	LAGENE12354	MSGENE18064	PIGENE16461	RCGENE17585	TPGENE17645	VWF	350538075	MUC5AC	748983076	Muc5ac	114431224	MUC5AC	741980838	MUC5AC; mucin 5AC, oligomeric mucus/gel-forming; K13908 mucin-5B	Mucin-5AC (Fragments) OS=Homo sapiens GN=MUC5AC PE=1 SV=3	E9PWB6_MOUSE Protein Muc5ac OS=Mus musculus GN=Muc5ac PE=4 SV=1	IPR001007:von Willebrand factor, type C;IPR001846:von Willebrand factor, type D domain;IPR002919:Trypsin Inhibitor-like, cysteine rich domain;IPR006207:Cystine knot, C-terminal;IPR006552:VWC out;IPR014853:Uncharacterised domain, cysteine-rich;IPR025155:WxxW domain	GO:0005515:protein binding; Molecular Function;
PIGENE20722	1			\	\	\	\	\	\	\	PIGENE20722	\	\	OTOG	335282166	MUC5AC	748983076	Muc5ac	568952672	MUC5AC	741980838	MUC5AC; mucin 5AC, oligomeric mucus/gel-forming; K13908 mucin-5B	Mucin-5AC (Fragments) OS=Homo sapiens GN=MUC5AC PE=1 SV=3	O97867_PIG Gastric mucin (Fragment) OS=Sus scrofa domesticus GN=MUC5AC PE=2 SV=1	IPR001007:von Willebrand factor, type C;IPR001846:von Willebrand factor, type D domain;IPR006207:Cystine knot, C-terminal;IPR014853:Uncharacterised domain, cysteine-rich	GO:0005515:protein binding; Molecular Function;
LAGENE19962	10			LWGENE10695	BKGENE11291	BMGENE11777	HAGENE10418	JHGENE10358	LAGENE19962	MSGENE07629	PIGENE09249	RCGENE08068	TPGENE07747	MYLK2	335304648	MYLK3	530424498	Mylk3	83776559	MYLK3	528990989	MYLK3; myosin light chain kinase 3; K00907 myosin-light-chain kinase [EC:2.7.11.18]	Myosin light chain kinase 3 OS=Homo sapiens GN=MYLK3 PE=2 SV=3	E1BMP3_BOVIN Uncharacterized protein OS=Bos taurus GN=MYLK3 PE=4 SV=2	IPR000719:Protein kinase domain;IPR002290:Serine/threonine- / dual specificity protein kinase, catalytic domain;IPR020635:Tyrosine-protein kinase, catalytic domain;IPR020636:Calcium/calmodulin-dependent/calcium-dependent protein kinase	GO:0002528:myosin light chain kinase 3;GO:0004672:protein kinase activity; Molecular Function;GO:0004683:myosin light chain kinase 3;GO:0004687:myosin light chain kinase 3;GO:0004713:protein tyrosine kinase activity; Molecular Function;GO:0005524:ATP binding; Molecular Function;GO:0005737:myosin light chain kinase 3;GO:0006468:protein phosphorylation; Biological Process;GO:0015629:myosin light ch…
TPGENE16867	10			LWGENE17760	BKGENE18136	BMGENE13665	HAGENE12592	JHGENE03739	LAGENE11413	MSGENE10403	PIGENE00265	RCGENE01650	TPGENE16867	MYO7A	153791794	MYO15B	822885214	Myo15	568972055	MYO15A	741963284	MYO10; myosin-XV-like; K10361 myosin XV	Putative unconventional myosin-XVB OS=Homo sapiens GN=MYO15B PE=5 SV=2	L5KL43_PTEAL Putative myosin-XVB OS=Pteropus alecto GN=PAL_GLEAN10014723 PE=4 SV=1	IPR000299:FERM domain;IPR000857:MyTH4 domain;IPR001452:Src homology-3 domain;IPR001609:Myosin head, motor domain;IPR011511:Variant SH3 domain;IPR019748:FERM central domain;IPR019749:Band 4.1 domain	GO:0003774:motor activity; Molecular Function;GO:0005515:protein binding; Molecular Function;GO:0005524:ATP binding; Molecular Function;GO:0005856:cytoskeleton; Cellular Component;GO:0016459:myosin complex; Cellular Component;
TPGENE09090	10			LWGENE06709	BKGENE12870	BMGENE08712	HAGENE00375	JHGENE12493	LAGENE01283	MSGENE03347	PIGENE02130	RCGENE08916	TPGENE09090	MYO7A	153791794	MYO15A	118402590	Myo15	157041244	MYO15A	741963284	MYO15A; myosin XVA; K10361 myosin XV	Unconventional myosin-XV OS=Homo sapiens GN=MYO15A PE=1 SV=2	M3WMK0_FELCA Uncharacterized protein (Fragment) OS=Felis catus GN=MYO15A PE=4 SV=1	IPR000048:IQ motif, EF-hand binding site;IPR000299:FERM domain;IPR000857:MyTH4 domain;IPR001609:Myosin head, motor domain;IPR011511:Variant SH3 domain;IPR019748:FERM central domain	GO:0003774:motor activity; Molecular Function;GO:0005515:protein binding; Molecular Function;GO:0005524:ATP binding; Molecular Function;GO:0005856:cytoskeleton; Cellular Component;GO:0016459:myosin complex; Cellular Component;
JHGENE14421	1			\	\	\	\	JHGENE14421	\	\	\	\	\	\	\	ASMTL	530423013	1810009N02Rik	21729757	ASMTL	78050073	N-acetylserotonin O-methyltransferase-like protein-like; K06287 septum formation protein	N-acetylserotonin O-methyltransferase-like protein OS=Homo sapiens GN=ASMTL PE=1 SV=3	H0X0D5_OTOGA Uncharacterized protein OS=Otolemur garnettii GN=ASMTL PE=3 SV=1	IPR003697:Maf-like protein	GO:0005737:cytoplasm; Cellular Component;
BKGENE05128	1			\	BKGENE05128	\	\	\	\	\	\	\	\	\	\	NPHP4	767903695	Nphp4	568931258	NPHP4	741954694	NPHP4; nephronophthisis 4; K16478 nephrocystin-4	Nephrocystin-4 OS=Mus musculus GN=Nphp4 PE=1 SV=2	E1BJB5_BOVIN Uncharacterized protein OS=Bos taurus GN=NPHP4 PE=4 SV=2	\	GO:0005813:tpa: nephronophthisis 4;GO:0005911:tpa: nephronophthisis 4;GO:0060041:tpa: nephronophthisis 4;
BMGENE15513	10			LWGENE13987	BKGENE05127	BMGENE15513	HAGENE14774	JHGENE16129	LAGENE20634	MSGENE16311	PIGENE01106	RCGENE16208	TPGENE17914	NPHP4	545833332	NPHP4	767903689	Nphp4	568931258	NPHP4	741954677	NPHP4; nephronophthisis 4; K16478 nephrocystin-4	Nephrocystin-4 OS=Mus musculus GN=Nphp4 PE=1 SV=2	E1BJB5_BOVIN Uncharacterized protein OS=Bos taurus GN=NPHP4 PE=4 SV=2	\	GO:0005813:tpa: nephronophthisis 4;GO:0005911:tpa: nephronophthisis 4;GO:0060041:tpa: nephronophthisis 4;
PIGENE20376	1			\	\	\	\	\	\	\	PIGENE20376	\	\	\	\	NPHP4	767903695	Nphp4	568931258	NPHP4	741954694	NPHP4; nephronophthisis 4; K16478 nephrocystin-4	Nephrocystin-4 OS=Mus musculus GN=Nphp4 PE=1 SV=2	E1BJB5_BOVIN Uncharacterized protein OS=Bos taurus GN=NPHP4 PE=4 SV=2	\	GO:0005813:tpa: nephronophthisis 4;GO:0005911:tpa: nephronophthisis 4;GO:0060041:tpa: nephronophthisis 4;
LWGENE13477	10			LWGENE13477	BKGENE16034	BMGENE08795	HAGENE13739	JHGENE17177	LAGENE15292	MSGENE07503	PIGENE12155	RCGENE14586	TPGENE16411	GRASP	311255361	NR4A1	320202956	Nr4a1	568991389	NR4A1	741925806	NR4A1; nuclear receptor subfamily 4, group A, member 1; K04465 nuclear receptor subfamily 4 group A member 1	Nuclear receptor subfamily 4 group A member 1 OS=Canis familiaris GN=NR4A1 PE=2 SV=1	F6XN57_HORSE Uncharacterized protein (Fragment) OS=Equus caballus GN=NR4A1 PE=3 SV=1	IPR000536:Nuclear hormone receptor, ligand-binding, core;IPR001478:PDZ domain;IPR001628:Zinc finger, nuclear hormone receptor-type;IPR001723:Steroid hormone receptor;IPR003070:Orphan nuclear receptor;IPR003071:Orphan nuclear receptor, HMR type	GO:0001077:nuclear receptor subfamily 4 group a member 1;GO:0001938:nuclear receptor subfamily 4 group a member 1;GO:0002042:nuclear receptor subfamily 4 group a member 1;GO:0003677:DNA binding; Molecular Function;GO:0003700:sequence-specific DNA binding transcription factor activity; Molecular Function;GO:0003707:steroid hormone receptor activity; Molecular Function;GO:0004879:ligand-activated s…
MSGENE07504	1			\	\	\	\	\	\	MSGENE07504	\	\	\	NR4A2	545874350	NR4A1	320202958	Nr4a1	568991389	NR4A1	741925806	NR4A1; nuclear receptor subfamily 4, group A, member 1; K04465 nuclear receptor subfamily 4 group A member 1	Nuclear receptor subfamily 4 group A member 1 OS=Canis familiaris GN=NR4A1 PE=2 SV=1	F6XN57_HORSE Uncharacterized protein (Fragment) OS=Equus caballus GN=NR4A1 PE=3 SV=1	IPR000536:Nuclear hormone receptor, ligand-binding, core;IPR001628:Zinc finger, nuclear hormone receptor-type;IPR001723:Steroid hormone receptor;IPR003070:Orphan nuclear receptor;IPR003071:Orphan nuclear receptor, HMR type	GO:0003677:DNA binding; Molecular Function;GO:0003700:sequence-specific DNA binding transcription factor activity; Molecular Function;GO:0003707:steroid hormone receptor activity; Molecular Function;GO:0004879:ligand-activated sequence-specific DNA binding RNA polymerase II transcription factor activity; Molecular Function;GO:0005634:nucleus; Cellular Component;GO:0006355:regulation of transcript…
TPGENE02430	10			LWGENE20631	BKGENE20392	BMGENE20766	HAGENE20489	JHGENE20632	LAGENE20515	MSGENE20736	PIGENE20354	RCGENE20369	TPGENE02430	LOC100739445	350579818	OR1B1	52219202	Olfr362	22128849	OR1B1	297480685	olfactory receptor 1B1-like; K04257 olfactory receptor	Olfactory receptor 1B1 OS=Homo sapiens GN=OR1B1 PE=2 SV=2	G3N1Z5_BOVIN Uncharacterized protein (Fragment) OS=Bos taurus GN=OR1B1 PE=3 SV=1	IPR000276:G protein-coupled receptor, rhodopsin-like;IPR000725:Olfactory receptor;IPR017452:GPCR, rhodopsin-like, 7TM	GO:0004930:G-protein coupled receptor activity; Molecular Function;GO:0004984:olfactory receptor activity; Molecular Function;GO:0005886:olfactory receptor 1b1;GO:0007186:G-protein coupled receptor signaling pathway; Biological Process;GO:0016021:integral to membrane; Cellular Component;
TPGENE01091	8			LWGENE20474	BKGENE20479	BMGENE20788	HAGENE20762	JHGENE20677	LAGENE20385	\	PIGENE20396	\	TPGENE01091	LOC100524234	311246373	OR1J4	52218826	Olfr350	33239296	LOC101906611	528935259	olfactory receptor 1J4-like; K04257 olfactory receptor	Olfactory receptor 1J4 OS=Homo sapiens GN=OR1J4 PE=2 SV=1	F1SLM6_PIG Uncharacterized protein OS=Sus scrofa GN=LOC100519758 PE=3 SV=1	IPR000276:G protein-coupled receptor, rhodopsin-like;IPR000725:Olfactory receptor;IPR017452:GPCR, rhodopsin-like, 7TM	GO:0004930:G-protein coupled receptor activity; Molecular Function;GO:0004984:olfactory receptor activity; Molecular Function;GO:0005886:olfactory receptor 1j4-like;GO:0007186:G-protein coupled receptor signaling pathway; Biological Process;GO:0016021:integral to membrane; Cellular Component;
BMGENE20623	1			\	\	BMGENE20623	\	\	\	\	\	\	\	LOC100738547	350590749	OR1N1	46048143	Olfr351	22129025	OR1J2	297480665	olfactory receptor 1N1-like; K04257 olfactory receptor	Olfactory receptor 1N1 OS=Homo sapiens GN=OR1N1 PE=2 SV=1	F6QRI1_HORSE Uncharacterized protein (Fragment) OS=Equus caballus GN=OR1N1 PE=3 SV=1	IPR000276:G protein-coupled receptor, rhodopsin-like;IPR000725:Olfactory receptor;IPR017452:GPCR, rhodopsin-like, 7TM	GO:0004930:G-protein coupled receptor activity; Molecular Function;GO:0004984:olfactory receptor activity; Molecular Function;GO:0007186:G-protein coupled receptor signaling pathway; Biological Process;GO:0016021:integral to membrane; Cellular Component;
HAGENE20267	1			\	\	\	HAGENE20267	\	\	\	\	\	\	LOC100738547	350590749	OR1N1	46048143	Olfr351	22129025	OR1J2	297480665	olfactory receptor 1N1-like; K04257 olfactory receptor	Olfactory receptor 1N1 OS=Homo sapiens GN=OR1N1 PE=2 SV=1	F6QRI1_HORSE Uncharacterized protein (Fragment) OS=Equus caballus GN=OR1N1 PE=3 SV=1	IPR000276:G protein-coupled receptor, rhodopsin-like;IPR000725:Olfactory receptor;IPR017452:GPCR, rhodopsin-like, 7TM	GO:0004930:G-protein coupled receptor activity; Molecular Function;GO:0004984:olfactory receptor activity; Molecular Function;GO:0007186:G-protein coupled receptor signaling pathway; Biological Process;GO:0016021:integral to membrane; Cellular Component;
MSGENE20460	1			\	\	\	\	\	\	MSGENE20460	\	\	\	LOC100738547	350590749	OR1N1	46048143	Olfr351	22129025	OR1J2	297480665	olfactory receptor 1N1-like; K04257 olfactory receptor	Olfactory receptor 1N1 OS=Homo sapiens GN=OR1N1 PE=2 SV=1	F1RV59_PIG Uncharacterized protein OS=Sus scrofa PE=3 SV=1	IPR000276:G protein-coupled receptor, rhodopsin-like;IPR000725:Olfactory receptor;IPR017452:GPCR, rhodopsin-like, 7TM	GO:0004930:G-protein coupled receptor activity; Molecular Function;GO:0004984:olfactory receptor activity; Molecular Function;GO:0007186:G-protein coupled receptor signaling pathway; Biological Process;GO:0016021:integral to membrane; Cellular Component;
PIGENE00329	10			LWGENE12621	BKGENE02267	BMGENE02052	HAGENE14617	JHGENE09555	LAGENE19344	MSGENE08601	PIGENE00329	RCGENE05434	TPGENE17532	LOC100738547	350590749	OR1N1	46048143	Olfr351	22129025	OR1J2	297480665	olfactory receptor 1N1-like; K04257 olfactory receptor	Olfactory receptor 1N1 OS=Homo sapiens GN=OR1N1 PE=2 SV=1	L8I4C9_BOSMU Olfactory receptor 1N1 (Fragment) OS=Bos grunniens mutus GN=M91_04284 PE=3 SV=1	IPR000276:G protein-coupled receptor, rhodopsin-like;IPR000725:Olfactory receptor;IPR017452:GPCR, rhodopsin-like, 7TM	GO:0004930:G-protein coupled receptor activity; Molecular Function;GO:0004984:olfactory receptor activity; Molecular Function;GO:0007186:G-protein coupled receptor signaling pathway; Biological Process;GO:0016021:integral to membrane; Cellular Component;
RCGENE03322	1			\	\	\	\	\	\	\	\	RCGENE03322	\	LOC100738547	350590749	OR1N1	46048143	Olfr351	22129025	OR1J2	297480665	olfactory receptor 1N1-like; K04257 olfactory receptor	Olfactory receptor 1N1 OS=Homo sapiens GN=OR1N1 PE=2 SV=1	F6QRI1_HORSE Uncharacterized protein (Fragment) OS=Equus caballus GN=OR1N1 PE=3 SV=1	IPR000276:G protein-coupled receptor, rhodopsin-like;IPR000725:Olfactory receptor;IPR017452:GPCR, rhodopsin-like, 7TM	GO:0004930:G-protein coupled receptor activity; Molecular Function;GO:0004984:olfactory receptor activity; Molecular Function;GO:0007186:G-protein coupled receptor signaling pathway; Biological Process;GO:0016021:integral to membrane; Cellular Component;
TPGENE06002	1			\	\	\	\	\	\	\	\	\	TPGENE06002	LOC100738547	350590749	OR1N1	46048143	Olfr351	22129025	OR1J2	297480665	olfactory receptor 1N1-like; K04257 olfactory receptor	Olfactory receptor 1N1 OS=Homo sapiens GN=OR1N1 PE=2 SV=1	F6QRI1_HORSE Uncharacterized protein (Fragment) OS=Equus caballus GN=OR1N1 PE=3 SV=1	IPR000276:G protein-coupled receptor, rhodopsin-like;IPR000725:Olfactory receptor;IPR017452:GPCR, rhodopsin-like, 7TM	GO:0004930:G-protein coupled receptor activity; Molecular Function;GO:0004984:olfactory receptor activity; Molecular Function;GO:0007186:G-protein coupled receptor signaling pathway; Biological Process;GO:0016021:integral to membrane; Cellular Component;
PIGENE20463	10			LWGENE04151	BKGENE06084	BMGENE20178	HAGENE00082	JHGENE10794	LAGENE02313	MSGENE08353	PIGENE20463	RCGENE12300	TPGENE08501	LOC100512292	311261129	OR4F3	52421349	Olfr1317	33238990	LOC521749	297479458	olfactory receptor 4F3/4F16/4F29-like; K04257 olfactory receptor	Olfactory receptor 4F3/4F16/4F29 OS=Homo sapiens GN=OR4F3 PE=2 SV=1	G1MNZ6_AILME Uncharacterized protein OS=Ailuropoda melanoleuca PE=3 SV=1	IPR000276:G protein-coupled receptor, rhodopsin-like;IPR000725:Olfactory receptor;IPR017452:GPCR, rhodopsin-like, 7TM	GO:0004930:G-protein coupled receptor activity; Molecular Function;GO:0004984:olfactory receptor activity; Molecular Function;GO:0005886:olfactory receptor 4f3 4f16 4f29-like;GO:0007186:G-protein coupled receptor signaling pathway; Biological Process;GO:0016021:integral to membrane; Cellular Component;
TPGENE08502	9			LWGENE20280	BKGENE20496	BMGENE20179	HAGENE20344	JHGENE20579	LAGENE20355	MSGENE20589	\	RCGENE20425	TPGENE08502	LOC100512292	311261129	OR4F3	52421349	Olfr1317	33238990	LOC521749	297479458	olfactory receptor 4F3/4F16/4F29-like; K04257 olfactory receptor	Olfactory receptor 4F3/4F16/4F29 OS=Homo sapiens GN=OR4F3 PE=2 SV=1	G1MNZ6_AILME Uncharacterized protein OS=Ailuropoda melanoleuca PE=3 SV=1	IPR000276:G protein-coupled receptor, rhodopsin-like;IPR000725:Olfactory receptor;IPR017452:GPCR, rhodopsin-like, 7TM	GO:0004930:G-protein coupled receptor activity; Molecular Function;GO:0004984:olfactory receptor activity; Molecular Function;GO:0005886:olfactory receptor 4f3 4f16 4f29-like;GO:0007186:G-protein coupled receptor signaling pathway; Biological Process;GO:0016021:integral to membrane; Cellular Component;
BMGENE20721	10			LWGENE20454	BKGENE20616	BMGENE20721	HAGENE18132	JHGENE20665	LAGENE20478	MSGENE20768	PIGENE20657	RCGENE20221	TPGENE02841	LOC100156762	194037412	OR6C4	53828708	Olfr766	309269663	LOC781363	194667256	olfactory receptor 6C4-like; K04257 olfactory receptor	Olfactory receptor 6C4 OS=Homo sapiens GN=OR6C4 PE=2 SV=1	L8HNF1_BOSMU Uncharacterized protein (Fragment) OS=Bos grunniens mutus GN=M91_19361 PE=3 SV=1	IPR000276:G protein-coupled receptor, rhodopsin-like;IPR000725:Olfactory receptor;IPR017452:GPCR, rhodopsin-like, 7TM	GO:0004930:G-protein coupled receptor activity; Molecular Function;GO:0004984:olfactory receptor activity; Molecular Function;GO:0007186:G-protein coupled receptor signaling pathway; Biological Process;GO:0016021:integral to membrane; Cellular Component;
LWGENE03889	9			LWGENE03889	BKGENE14764	BMGENE18402	HAGENE13070	JHGENE13969	LAGENE08165	MSGENE16761	PIGENE00972	RCGENE09976	\	LOC100739369	545812628	PCDHB5	730229393	Pcdhb14	148613871	LOC786512	741933880	PCDHB16; protocadherin beta-17-like; K16494 protocadherin beta	Protocadherin beta-17 OS=Pan troglodytes GN=PCDHB17 PE=3 SV=1	I3LP38_PIG Uncharacterized protein (Fragment) OS=Sus scrofa PE=4 SV=1	IPR002126:Cadherin;IPR013164:Cadherin, N-terminal	GO:0005509:calcium ion binding; Molecular Function;GO:0007156:homophilic cell adhesion; Biological Process;GO:0016020:membrane; Cellular Component;
BMGENE13379	9			LWGENE01245	BKGENE20241	BMGENE13379	HAGENE20189	JHGENE09141	LAGENE05779	MSGENE13833	PIGENE02582	RCGENE09215	\	LOC100623620	545894833	SURF4	19557691	Surf4	6755698	SURF4	156523130	PCLO; piccolo presynaptic cytomatrix protein; K16882 protein piccolo	Surfeit locus protein 4 OS=Bos taurus GN=SURF4 PE=2 SV=1	L8IJ99_BOSMU Uncharacterized protein (Fragment) OS=Bos grunniens mutus GN=M91_19668 PE=4 SV=1	IPR002995:Surfeit locus 4	GO:0016021:integral to membrane; Cellular Component;
TPGENE02284	10			LWGENE07039	BKGENE12995	BMGENE02749	HAGENE05862	JHGENE13607	LAGENE01312	MSGENE12929	PIGENE12797	RCGENE07987	TPGENE02284	AKAP9	359465576	PCNT	530419254	Pcnt	545478542	PCNT	741915621	PCNT; pericentrin; K16481 pericentrin	Pericentrin OS=Mus musculus GN=Pcnt PE=1 SV=2	E1BKZ0_BOVIN Uncharacterized protein OS=Bos taurus GN=PCNT PE=4 SV=2	IPR019528:Pericentrin/AKAP-450 centrosomal targeting domain;IPR024151:Pericentrin	\
JHGENE16797	1			\	\	\	\	JHGENE16797	\	\	\	\	\	GPRASP1	545885908	ARMCX4	609876456	Armcx4	569011209	ARMCX4	741982060	pentatricopeptide repeat-containing protein 3, mitochondrial-like; K17659 pentatricopeptide repeat domain-containing protein 3	Armadillo repeat-containing X-linked protein 4 OS=Homo sapiens GN=ARMCX4 PE=2 SV=2	F8W8Y7_HUMAN Armadillo repeat-containing X-linked protein 4 OS=Homo sapiens GN=ARMCX4 PE=2 SV=2	IPR006911:Armadillo repeat-containing domain	\
HAGENE20165	10		●	LWGENE15672	BKGENE13606	BMGENE12918	HAGENE20165	JHGENE03226	LAGENE16542	MSGENE03667	PIGENE05670	RCGENE08391	TPGENE15754	PKD1	545815484	PKD1L2	116006951	Pkd1l2	568957813	PKD1L2	741958002	PKD1L2; polycystic kidney disease 1-like 2; K04988 polycystin 1L2	Polycystic kidney disease protein 1-like 2 OS=Homo sapiens GN=PKD1L2 PE=1 SV=4	F1MLH0_BOVIN Uncharacterized protein OS=Bos taurus PE=4 SV=2	IPR000203:GPS domain;IPR000922:D-galactoside/L-rhamnose binding SUEL lectin domain;IPR001024:PLAT/LH2 domain;IPR001304:C-type lectin;IPR002859:PKD/REJ-like protein;IPR003915:Polycystic kidney disease type 2 protein;IPR013122:Polycystin cation channel, PKD1/PKD2;IPR014010:Egg jelly receptor, REJ-like	GO:0005509:calcium ion binding; Molecular Function;GO:0005515:protein binding; Molecular Function;GO:0007218:neuropeptide signaling pathway; Biological Process;GO:0016020:membrane; Cellular Component;GO:0030246:carbohydrate binding; Molecular Function;
HAGENE14598	1			\	\	\	HAGENE14598	\	\	\	\	\	\	DSP	311259696	EPPK1	767953676	Eppk1	37537522	EPPK1	528975308	plec; plectin; K10388 plectin	Epiplakin OS=Mus musculus GN=Eppk1 PE=1 SV=2	L5KK33_PTEAL Epiplakin OS=Pteropus alecto GN=PAL_GLEAN10010459 PE=4 SV=1	IPR001101:Plectin repeat	GO:0005856:cytoskeleton; Cellular Component;
JHGENE12046	1			\	\	\	\	JHGENE12046	\	\	\	\	\	DSP	311259696	EPPK1	767953676	Eppk1	37537522	EPPK1	528975308	plec; plectin; K10388 plectin	Epiplakin OS=Mus musculus GN=Eppk1 PE=1 SV=2	L5KK33_PTEAL Epiplakin OS=Pteropus alecto GN=PAL_GLEAN10010459 PE=4 SV=1	IPR001101:Plectin repeat	GO:0005856:cytoskeleton; Cellular Component;
TPGENE02223	1			\	\	\	\	\	\	\	\	\	TPGENE02223	DSP	311259696	EPPK1	767953676	Eppk1	37537522	EPPK1	528914337	plec; plectin; K10388 plectin	Epiplakin OS=Mus musculus GN=Eppk1 PE=1 SV=2	E9PPU0_HUMAN Epiplakin OS=Homo sapiens GN=EPPK1 PE=4 SV=1	IPR001101:Plectin repeat	GO:0005856:cytoskeleton; Cellular Component;
TPGENE14383	10			LWGENE18927	BKGENE11506	BMGENE15731	HAGENE03861	JHGENE15706	LAGENE15205	MSGENE11479	PIGENE14586	RCGENE07759	TPGENE14383	\	\	POLRMT	110618253	Polrmt	281332113	POLRMT	741933370	POLRMT; polymerase (RNA) mitochondrial (DNA directed); K10908 DNA-directed RNA polymerase, mitochondrial [EC:2.7.7.6]	DNA-directed RNA polymerase, mitochondrial OS=Homo sapiens GN=POLRMT PE=1 SV=2	M3V845_PIG DNA-directed RNA polymerase OS=Sus scrofa GN=POLRMT PE=2 SV=1	IPR002092:DNA-directed RNA polymerase, phage-type;IPR002885:Pentatricopeptide repeat	GO:0003677:DNA binding; Molecular Function;GO:0003899:DNA-directed RNA polymerase activity; Molecular Function;GO:0006351:transcription, DNA-dependent; Biological Process;GO:0042645:tpa: cg4644-like;
RCGENE04349	10			LWGENE20010	BKGENE07365	BMGENE06569	HAGENE05952	JHGENE08498	LAGENE05481	MSGENE08610	PIGENE05991	RCGENE04349	TPGENE03527	LOC102160080	545864112	LOC102725016	768048703	Ppp2r3d	254540101	PPP2R3B	528931131	PPP2R3B; protein phosphatase 2, regulatory subunit B'', beta; K11583 serine/threonine-protein phosphatase 2A regulatory subunit B''	Serine/threonine-protein phosphatase 2A regulatory subunit B'' subunit beta OS=Homo sapiens GN=PPP2R3B PE=1 SV=2	G1L562_AILME Uncharacterized protein OS=Ailuropoda melanoleuca GN=PPP2R3B PE=4 SV=1	IPR002048:EF-hand domain;IPR011992:EF-hand domain pair	GO:0005509:calcium ion binding; Molecular Function;
JHGENE15518	10			LWGENE12180	BKGENE08771	BMGENE16957	HAGENE03627	JHGENE15518	LAGENE03427	MSGENE18823	PIGENE02814	RCGENE07565	TPGENE00673	\	\	LSM10	14249632	Lsm10	568928264	LSM10	139948936	putative small nuclear ribonucleoprotein; K11087 small nuclear ribonucleoprotein D1	U7 snRNA-associated Sm-like protein LSm10 OS=Homo sapiens GN=LSM10 PE=1 SV=1	G3T416_LOXAF Uncharacterized protein OS=Loxodonta africana GN=LOC100665419 PE=4 SV=1	IPR001163:Ribonucleoprotein LSM domain;IPR006649:Ribonucleoprotein LSM domain, eukaryotic/archaea-type	\
BMGENE13385	10			LWGENE01239	BKGENE16886	BMGENE13385	HAGENE14849	JHGENE09134	LAGENE05771	MSGENE13840	PIGENE02587	RCGENE09221	TPGENE03321	RALGDS	545804953	RALGDS	108796058	Ralgds	568913180	LOC100336108	741886619	RALGDS; ral guanine nucleotide dissociation stimulator; K08732 ral guanine nucleotide dissociation stimulator	Ral guanine nucleotide dissociation stimulator OS=Homo sapiens GN=RALGDS PE=1 SV=2	F1S0S1_PIG Uncharacterized protein (Fragment) OS=Sus scrofa GN=RALGDS PE=4 SV=2	IPR000159:Ras-association;IPR000651:Ras-like guanine nucleotide exchange factor, N-terminal;IPR001895:Guanine-nucleotide dissociation stimulator CDC25;IPR008937:Ras guanine nucleotide exchange factor;IPR015758:Guanine nucleotide dissociation stimulator RalGDS	GO:0005085:guanyl-nucleotide exchange factor activity; Molecular Function;GO:0005622:intracellular; Cellular Component;GO:0007165:signal transduction; Biological Process;GO:0007264:small GTPase mediated signal transduction; Biological Process;GO:0051056:regulation of small GTPase mediated signal transduction; Biological Process;
BKGENE11421	10			LWGENE08029	BKGENE11421	BMGENE02551	HAGENE10169	JHGENE03145	LAGENE13143	MSGENE10616	PIGENE10193	RCGENE03222	TPGENE07219	RDH12	343432635	RDH13	768055709	Rdh13	30425078	RDH13	115496474	RDH13; retinol dehydrogenase 13 (all-trans/9-cis); K11161 retinol dehydrogenase 13 [EC:1.1.1.300]	Retinol dehydrogenase 13 OS=Homo sapiens GN=RDH13 PE=1 SV=2	E2QUH8_CANFA Uncharacterized protein OS=Canis familiaris GN=RDH13 PE=3 SV=1	IPR002198:Short-chain dehydrogenase/reductase SDR;IPR002347:Glucose/ribitol dehydrogenase	GO:0000166:retinol dehydrogenase 13;GO:0005739:retinol dehydrogenase 13;GO:0008152:metabolic process; Biological Process;GO:0016491:oxidoreductase activity; Molecular Function;
TPGENE14389	10			LWGENE18934	BKGENE11513	BMGENE15738	HAGENE03868	JHGENE20171	LAGENE15198	MSGENE11486	PIGENE14579	RCGENE07766	TPGENE14389	ODF3B	545828749	ODF3L2	32698984	Odf3l2	85701995	ODF3L2	741933497	SHC2; SHC (Src homology 2 domain containing) transforming protein 2; K17447 SHC- transforming protein 2	Outer dense fiber protein 3-like protein 2 OS=Homo sapiens GN=ODF3L2 PE=1 SV=2	F1MQU9_BOVIN Uncharacterized protein OS=Bos taurus GN=ODF3L2 PE=4 SV=2	IPR010736:Sperm-tail PG-rich repeat	\
BMGENE11485	10			LWGENE10747	BKGENE19696	BMGENE11485	HAGENE19459	JHGENE10147	LAGENE07113	MSGENE03765	PIGENE07574	RCGENE18196	TPGENE03381	SLC26A6	545862145	SLC26A9	217272867	Slc26a9	568909298	SLC26A9	741891325	SLC26A9; solute carrier family 26 (anion exchanger), member 9; K14706 solute carrier family 26 (sulfate anion transporter), member 9	Solute carrier family 26 member 9 OS=Homo sapiens GN=SLC26A9 PE=1 SV=1	L8HQX3_BOSMU Solute carrier family 26 member 9 OS=Bos grunniens mutus GN=M91_08986 PE=4 SV=1	IPR002645:STAS domain;IPR011547:Sulphate transporter	GO:0008272:sulfate transport; Biological Process;GO:0015116:sulfate transmembrane transporter activity; Molecular Function;GO:0016021:integral to membrane; Cellular Component;
TPGENE16038	10			LWGENE09660	BKGENE15513	BMGENE13765	HAGENE07283	JHGENE18817	LAGENE06905	MSGENE00974	PIGENE16614	RCGENE16606	TPGENE16038	SLC9A6	545886938	SLC9A8	768016771	Slc9a8	568918866	SLC9A8	741949111	SLC9A8; solute carrier family 9, subfamily A (NHE8, cation proton antiporter 8), member 8; K14724 solute carrier family 9 (sodium/hydrogen exchanger), member 8	Sodium/hydrogen exchanger 8 OS=Homo sapiens GN=SLC9A8 PE=1 SV=4	F6PXY4_CALJA Uncharacterized protein OS=Callithrix jacchus GN=SLC9A8 PE=4 SV=1	IPR006153:Cation/H+ exchanger;IPR018409:Na+/H+ exchanger, isoform 8, eukaryotic;IPR018422:Cation/H+ exchanger, CPA1 family	GO:0006812:cation transport; Biological Process;GO:0006814:sodium ion transport; Biological Process;GO:0006885:regulation of pH; Biological Process;GO:0015299:solute:hydrogen antiporter activity; Molecular Function;GO:0015385:sodium:hydrogen antiporter activity; Molecular Function;GO:0016021:integral to membrane; Cellular Component;GO:0055085:transmembrane transport; Biological Process;
BMGENE18709	7			LWGENE17486	\	BMGENE18709	HAGENE02108	JHGENE18547	LAGENE07368	MSGENE15513	\	\	TPGENE06168	SLCO4C1	350580955	SLCO4A1	39777594	Slco4a1	568920077	SLCO4A1	528973570	SLCO4A1; solute carrier organic anion transporter family, member 4A1; K14354 solute carrier organic anion transporter family, member 4A	Solute carrier organic anion transporter family member 4A1 OS=Homo sapiens GN=SLCO4A1 PE=1 SV=2	E1BPV8_BOVIN Uncharacterized protein OS=Bos taurus GN=SLCO4A1 PE=4 SV=1	IPR002350:Kazal domain;IPR004156:Organic anion transporter polypeptide OATP;IPR020846:Major facilitator superfamily domain	GO:0005215:transporter activity; Molecular Function;GO:0005515:protein binding; Molecular Function;GO:0006810:transport; Biological Process;GO:0016020:membrane; Cellular Component;
LAGENE07592	10			LWGENE16565	BKGENE13768	BMGENE15110	HAGENE09149	JHGENE01058	LAGENE07592	MSGENE05790	PIGENE07180	RCGENE07355	TPGENE07710	SPATA2L	545828886	BEAN1	767989436	Bean1	755527135	LOC104974812	741958809	spermatogenesis-associated protein 2-like protein-like; K17595 spermatogenesis-associated protein 2	Protein BEAN1 OS=Homo sapiens GN=BEAN1 PE=2 SV=2	J9P8T0_CANFA Uncharacterized protein OS=Canis familiaris GN=BEAN1 PE=4 SV=1	\	\
TPGENE06175	10			LWGENE17479	BKGENE12204	BMGENE18702	HAGENE02102	JHGENE18540	LAGENE07373	MSGENE18471	PIGENE17325	RCGENE08298	TPGENE06175	OSBPL1A	545835320	OSBPL2	21450853	Osbpl2	110625879	OSBPL2	528973442	sterol binding ankyrin repeat protein (predicted); K06867	Oxysterol-binding protein-related protein 2 OS=Homo sapiens GN=OSBPL2 PE=1 SV=1	M3V843_PIG Oxysterol-binding protein OS=Sus scrofa GN=OSBPL2 PE=2 SV=1	IPR000648:Oxysterol-binding protein	GO:0006869:oxysterol-binding protein 2 isoform 1;
TPGENE16826	9			LWGENE19566	BKGENE14459	BMGENE15278	HAGENE13905	JHGENE01906	\	MSGENE02349	PIGENE11990	RCGENE00851	TPGENE16826	RPH3A	545869076	RPH3AL	768045185	Rph3al	568974627	RPH3AL	78369653	sytl4, slp4; synaptotagmin-like 4; K17598 synaptotagmin-like protein	Rab effector Noc2 OS=Bos taurus GN=RPH3AL PE=2 SV=1	M3YQM8_MUSPF Uncharacterized protein OS=Mustela putorius furo GN=Rph3al PE=4 SV=1	IPR010911:Zinc finger, FYVE-type;IPR017455:Zinc finger, FYVE-related	GO:0005622:hypothetical protein PANDA_006489 [Ailuropoda melanoleuca];GO:0006886:intracellular protein transport; Biological Process;GO:0008270:hypothetical protein PANDA_006489 [Ailuropoda melanoleuca];GO:0017137:Rab GTPase binding; Molecular Function;GO:0046872:hypothetical protein PANDA_006489 [Ailuropoda melanoleuca];
BMGENE08708	10			LWGENE06705	BKGENE12874	BMGENE08708	HAGENE00379	JHGENE12489	LAGENE01279	MSGENE03343	PIGENE02126	RCGENE08912	TPGENE09086	DNAAF1	545829130	LRRC48	578830057	Lrrc48	21312844	LRRC48	741963035	Tb06.30P15.410; hypothetical protein; K11092 U2 small nuclear ribonucleoprotein A'	Leucine-rich repeat-containing protein 48 OS=Homo sapiens GN=LRRC48 PE=2 SV=2	L8IR46_BOSMU Leucine-rich repeat-containing protein 48 OS=Bos grunniens mutus GN=M91_06571 PE=4 SV=1	IPR001611:Leucine-rich repeat;IPR003591:Leucine-rich repeat, typical subtype	GO:0005515:protein binding; Molecular Function;
LAGENE09256	10			LWGENE09113	BKGENE12081	BMGENE10141	HAGENE06783	JHGENE02408	LAGENE09256	MSGENE08598	PIGENE17522	RCGENE06515	TPGENE14366	\	\	TRMT44	298160987	Trmt44	254588054	TRMT44	297476087	TRMT44; tRNA methyltransferase 44 homolog (S. cerevisiae); K15447 tRNASer (uridine44-2'-O)-methyltransferase [EC:2.1.1.211]	Probable tRNA (uracil-O(2)-)-methyltransferase OS=Homo sapiens GN=TRMT44 PE=2 SV=2	E1BAA5_BOVIN Uncharacterized protein OS=Bos taurus GN=METTL19 PE=4 SV=2	IPR000571:Zinc finger, CCCH-type;IPR011671:tRNA (uracil-O(2)-)-methyltransferase	GO:0005488:probable trna (uracil-o -)-methyltransferase;GO:0008168:methyltransferase activity; Molecular Function;GO:0046872:metal ion binding; Molecular Function;
LWGENE02797	10			LWGENE02797	BKGENE09625	BMGENE02140	HAGENE02762	JHGENE06240	LAGENE07217	MSGENE03513	PIGENE16888	RCGENE15005	TPGENE19866	LOC100622032	545867611	TRPM5	11225266	Trpm5	568952966	TRPM5	741980824	TRPM5; transient receptor potential cation channel, subfamily M, member 5; K04980 transient receptor potential cation channel subfamily M member 5	Transient receptor potential cation channel subfamily M member 5 OS=Homo sapiens GN=TRPM5 PE=1 SV=1	F6R5S2_HORSE Uncharacterized protein OS=Equus caballus GN=TRPM5 PE=4 SV=1	\	\
HAGENE07363	10			LWGENE08083	BKGENE08187	BMGENE18782	HAGENE07363	JHGENE02586	LAGENE12367	MSGENE09759	PIGENE11841	RCGENE13896	TPGENE08361	STX12	343478210	TSNARE1	767952692	Gm32168	755553005	TSNARE1	528975197	TSNARE1; t-SNARE domain containing 1; K13814 t-SNARE domain-containing protein 1	t-SNARE domain-containing protein 1 OS=Homo sapiens GN=TSNARE1 PE=2 SV=2	F6PHU7_HORSE Uncharacterized protein OS=Equus caballus GN=TSNARE1 PE=4 SV=1	IPR006011:Syntaxin, N-terminal domain;IPR028002:Myb/SANT-like DNA-binding domain	GO:0016020:membrane; Cellular Component;GO:0016192:t-snare domain-containing protein 1 isoform 2;
TPGENE20261	6			LWGENE16282	\	\	HAGENE20082	JHGENE19173	LAGENE20065	\	PIGENE20158	\	TPGENE20261	VWF	350538075	VWF	89191868	Vwf	568941439	VWF	328887902	VWF; von Willebrand factor; K03900 von Willebrand factor	von Willebrand factor (Fragment) OS=Sus scrofa GN=VWF PE=2 SV=2	F5XVC2_PIG von Willebrand factor OS=Sus scrofa GN=VWF PE=2 SV=1	IPR001007:von Willebrand factor, type C;IPR001846:von Willebrand factor, type D domain;IPR006207:Cystine knot, C-terminal;IPR014853:Uncharacterised domain, cysteine-rich	GO:0001948:von willebrand factor precursor;GO:0002020:von willebrand factor precursor;GO:0005178:von willebrand factor precursor;GO:0005515:protein binding; Molecular Function;GO:0005518:von willebrand factor precursor;GO:0005578:von willebrand factor precursor;GO:0005783:von willebrand factor precursor;GO:0019865:von willebrand factor precursor;GO:0030168:von willebrand factor precursor;GO:00315…
LWGENE01985	10			LWGENE01985	BKGENE09572	BMGENE11059	HAGENE08161	JHGENE05894	LAGENE10885	MSGENE14097	PIGENE00313	RCGENE02956	TPGENE09398	ZNF84	545868432	ZNF347	768011589	Gm30910	755510436	LOC100300095	741895469	ZNF836; zinc finger protein 836; K09228 KRAB domain-containing zinc finger protein	Zinc finger protein 836 OS=Homo sapiens GN=ZNF836 PE=2 SV=2	F1MVJ7_BOVIN Uncharacterized protein (Fragment) OS=Bos taurus PE=4 SV=2	IPR001909:Krueppel-associated box;IPR007087:Zinc finger, C2H2;IPR015880:Zinc finger, C2H2-like	GO:0003676:nucleic acid binding; Molecular Function;GO:0005622:intracellular; Cellular Component;GO:0006355:regulation of transcription, DNA-dependent; Biological Process;GO:0046872:metal ion binding; Molecular Function;
RCGENE11238	10	●	●	LWGENE08113	BKGENE03247	BMGENE18771	HAGENE16536	JHGENE18020	LAGENE03826	MSGENE16977	PIGENE17114	RCGENE11238	TPGENE20429	AKT1	229576869	AKT1	62241015	Akt1	6753034	AKT1	27806747	AKT1, Akt, PKB; v-akt murine thymoma viral oncogene homolog 1 (EC:2.7.11.1); K04456 RAC serine/threonine-protein kinase [EC:2.7.11.1]	RAC-alpha serine/threonine-protein kinase OS=Bos taurus GN=AKT1 PE=1 SV=2	G9BWQ1_PIG V-akt murine thymoma viral oncogene-like 1 OS=Sus scrofa GN=AKT1 PE=2 SV=1	IPR000719:Protein kinase domain;IPR000961:AGC-kinase, C-terminal;IPR001849:Pleckstrin homology domain;IPR002290:Serine/threonine- / dual specificity protein kinase, catalytic domain;IPR017892:Protein kinase, C-terminal;IPR020635:Tyrosine-protein kinase, catalytic domain	GO:0004672:protein kinase activity; Molecular Function;GO:0004674:protein serine/threonine kinase activity; Molecular Function;GO:0004713:protein tyrosine kinase activity; Molecular Function;GO:0005515:protein binding; Molecular Function;GO:0005524:ATP binding; Molecular Function;GO:0005543:phospholipid binding; Molecular Function;GO:0006468:protein phosphorylation; Biological Process;
LWGENE20698	10	●	●	LWGENE20698	BKGENE20790	BMGENE20941	HAGENE20804	JHGENE20786	LAGENE20739	MSGENE20880	PIGENE20794	RCGENE20625	TPGENE20446	IL23A	194332506	IL23A	7706702	Il23a	13752579	IL23A	741926598	IL23A, SGRF, il23p19; interleukin 23, alpha subunit p19; K05426 interleukin 23, alpha subunit p19	Interleukin-23 subunit alpha OS=Sus scrofa GN=IL23A PE=3 SV=1	C8KIR2_PIG Interleukin 23 p19 subunit OS=Sus scrofa GN=il23p19 PE=2 SV=1	IPR003573:Interleukin-6/Interleukin-23/GCSF/MGF;IPR010831:Interleukin-23 alpha	GO:0005125:cytokine activity; Molecular Function;GO:0005576:extracellular region; Cellular Component;GO:0005615:interleukin-23 subunit alpha precursor;GO:0006954:interleukin-23 subunit alpha precursor;GO:0006955:immune response; Biological Process;GO:0045087:interleukin-23 subunit alpha precursor;GO:0048771:interleukin-23 subunit alpha precursor;GO:0051607:interleukin-23 subunit alpha precursor;
HAGENE04953	10	●	●	LWGENE04256	BKGENE16497	BMGENE17403	HAGENE04953	JHGENE10182	LAGENE16148	MSGENE07230	PIGENE11807	RCGENE17831	TPGENE01235	LOC100622674	335306423	IRS2	38683860	Irs2	124487073	IRS2	528972190	IRS2; insulin receptor substrate 2; K07187 insulin receptor substrate 2	Insulin receptor substrate 2 OS=Mus musculus GN=Irs2 PE=1 SV=2	K9J0J8_DESRO Putative insulin receptor substrate 2 OS=Desmodus rotundus PE=2 SV=1	IPR001849:Pleckstrin homology domain;IPR002404:Insulin receptor substrate-1, PTB	GO:0005158:insulin receptor binding; Molecular Function;GO:0005515:protein binding; Molecular Function;GO:0005543:phospholipid binding; Molecular Function;
MSGENE06669	10	●	●	LWGENE12255	BKGENE11832	BMGENE05094	HAGENE06865	JHGENE16746	LAGENE00647	MSGENE06669	PIGENE18186	RCGENE16027	TPGENE16477	NFKB1	115312276	NFKB1	34577122	Nfkb1	117606364	NFKB1	115497302	NFKB1; nuclear factor of kappa light polypeptide gene enhancer in B-cells 1; K02580 nuclear factor NF-kappa-B p105 subunit	Nuclear factor NF-kappa-B p105 subunit OS=Canis familiaris GN=NFKB1 PE=2 SV=2	A7XNS1_PIG Nuclear factor of kappa light polypeptide enhancer in B-cells 1 OS=Sus scrofa GN=NFKB1 PE=2 SV=1	IPR000451:NF-kappa-B/Rel/Dorsal;IPR000488:Death domain;IPR002110:Ankyrin repeat;IPR002909:IPT domain;IPR011539:Rel homology domain;IPR020683:Ankyrin repeat-containing domain	GO:0003700:sequence-specific DNA binding transcription factor activity; Molecular Function;GO:0005515:protein binding; Molecular Function;GO:0005634:nucleus; Cellular Component;GO:0006355:regulation of transcription, DNA-dependent; Biological Process;GO:0007165:signal transduction; Biological Process;
HAGENE20832	1	●	●	\	\	\	HAGENE20832	\	\	\	\	\	\	RPS6	311245732	RPS6	17158044	Rps6	6677809	RPS6	62752040	rps6, wu:fa92e06, wu:fb64g06, zgc:92237; ribosomal protein S6; K02991 small subunit ribosomal protein S6e	40S ribosomal protein S6 OS=Rattus norvegicus GN=Rps6 PE=1 SV=1	E0YP54_HYPNO 40S ribosomal protein S6 OS=Hypophthalmichthys nobilis PE=2 SV=1	IPR001377:Ribosomal protein S6e	GO:0003735:structural constituent of ribosome; Molecular Function;GO:0005622:intracellular; Cellular Component;GO:0005840:ribosome; Cellular Component;GO:0006412:translation; Biological Process;
MSGENE02420	1	●	●	\	\	\	\	\	\	MSGENE02420	\	\	\	XBP1	218664479	XBP1	14110395	Xbp1	13775156	XBP1	77736399	XBP1, XBPP1; X-box binding protein 1; K09027 X box-binding protein 1	X-box-binding protein 1 OS=Bos taurus GN=XBP1 PE=2 SV=1	B7THW4_PIG X-box-binding protein 1 OS=Sus scrofa GN=XBP1 PE=2 SV=1	IPR004827:Basic-leucine zipper domain	GO:0003700:sequence-specific DNA binding transcription factor activity; Molecular Function;GO:0006355:regulation of transcription, DNA-dependent; Biological Process;GO:0043565:sequence-specific DNA binding; Molecular Function;
BKGENE03246	10	●		LWGENE08112	BKGENE03246	BMGENE18770	HAGENE16535	JHGENE18019	LAGENE03825	MSGENE16976	PIGENE17113	RCGENE11239	TPGENE13108	\	\	SIVA1	11277468	Siva1	240120126	SIVA1	300798708	\	Apoptosis regulatory protein Siva OS=Homo sapiens GN=SIVA1 PE=1 SV=2	M3VK34_PIG SIVA1, apoptosis-inducing factor OS=Sus scrofa GN=SIVA1 PE=2 SV=1	IPR022773:Siva	\
BMGENE15175	10	●		LWGENE16500	BKGENE16176	BMGENE15175	HAGENE09757	JHGENE17294	LAGENE07659	MSGENE05855	PIGENE07242	RCGENE07421	TPGENE07644	\	\	SLC7A6OS	269315880	Slc7a6os	57222272	SLC7A6OS	115497480	\	Probable RNA polymerase II nuclear localization protein SLC7A6OS OS=Homo sapiens GN=SLC7A6OS PE=1 SV=2	D2HLJ8_AILME Uncharacterized protein (Fragment) OS=Ailuropoda melanoleuca GN=SLC7A6OS PE=4 SV=1	\	\
HAGENE09147	10	●		LWGENE16562	BKGENE13770	BMGENE15113	HAGENE09147	JHGENE01056	LAGENE07595	MSGENE05793	PIGENE07176	RCGENE07358	TPGENE07707	CMTM5	347300362	CMTM3	578828818	Cmtm3	568957487	CMTM3	150247065	\	CKLF-like MARVEL transmembrane domain-containing protein 3 OS=Homo sapiens GN=CMTM3 PE=2 SV=1	F1P6V2_CANFA Uncharacterized protein OS=Canis familiaris GN=CMTM2 PE=4 SV=2	IPR008253:Marvel domain	GO:0016020:membrane; Cellular Component;
MSGENE06673	10	●		LWGENE12257	BKGENE11829	BMGENE05096	HAGENE06862	JHGENE16748	LAGENE00644	MSGENE06673	PIGENE18189	RCGENE16024	TPGENE17242	LOC100622882	545894624	BANK1	260763966	Bank1	568922801	BANK1	528934305	\	B-cell scaffold protein with ankyrin repeats OS=Homo sapiens GN=BANK1 PE=1 SV=3	I3LV96_PIG Uncharacterized protein OS=Sus scrofa GN=LOC100622882 PE=4 SV=1	\	\
PIGENE09868	10	●		LWGENE20155	BKGENE20273	BMGENE20460	HAGENE06820	JHGENE20221	LAGENE20241	MSGENE20339	PIGENE09868	RCGENE06479	TPGENE13134	SPON1	350580282	SPON2	6912682	Spon2	568933535	SPON2	114051520	\	Spondin-2 OS=Rattus norvegicus GN=Spon2 PE=1 SV=1	F6PSS5_BOVIN Uncharacterized protein OS=Bos taurus GN=SPON2 PE=4 SV=1	IPR000884:Thrombospondin, type 1 repeat;IPR009465:Spondin, N-terminal	\
PIGENE20815	10	●		LWGENE20681	BKGENE20793	BMGENE20932	HAGENE20783	JHGENE20800	LAGENE20788	MSGENE20862	PIGENE20815	RCGENE20618	TPGENE20448	GCM2	545837294	GCM2	767940979	Gcm2	755544636	GCM2	741972009	\	Chorion-specific transcription factor GCMb OS=Homo sapiens GN=GCM2 PE=1 SV=1	L5KU53_PTEAL Chorion-specific transcription factor GCMb OS=Pteropus alecto GN=PAL_GLEAN10016458 PE=4 SV=1	IPR003902:Transcription regulator, GCM-like	GO:0003677:DNA binding; Molecular Function;GO:0006355:regulation of transcription, DNA-dependent; Biological Process;
TPGENE02947	10	●		LWGENE05458	BKGENE08449	BMGENE12765	HAGENE07523	JHGENE01601	LAGENE09794	MSGENE01442	PIGENE06496	RCGENE10868	TPGENE02947	\	\	NFAM1	768023737	Nfam1	406719595	NFAM1	741928639	\	NFAT activation molecule 1 OS=Homo sapiens GN=NFAM1 PE=1 SV=1	F1ML17_BOVIN Uncharacterized protein (Fragment) OS=Bos taurus GN=NFAM1 PE=4 SV=1	\	\
TPGENE13333	10	●		LWGENE12186	BKGENE08777	BMGENE16951	HAGENE03633	JHGENE12275	LAGENE03418	MSGENE11406	PIGENE10226	RCGENE07571	TPGENE13333	ZC3H12B	335306107	ZC3H12A	156151383	Zc3h12a	24233519	ZC3H12A	528944910	\	Ribonuclease ZC3H12A OS=Bos taurus GN=ZC3H12A PE=2 SV=1	F6YJG4_HORSE Uncharacterized protein OS=Equus caballus GN=ZC3H12A PE=4 SV=1	IPR021869:Ribonuclease Zc3h12a-like	\
HAGENE12921	1	●		\	\	\	HAGENE12921	\	\	\	\	\	\	RPS8	311259452	RPS8	4506743	Rps8	6677813	RPS8	70778956	40S ribosomal protein S8-like; K02995 small subunit ribosomal protein S8e	40S ribosomal protein S8 OS=Danio rerio GN=rps8 PE=2 SV=2	E3TC01_9TELE 40S ribosomal protein S8 OS=Ictalurus furcatus GN=RS8 PE=2 SV=1	IPR001047:Ribosomal protein S8e;IPR022309:Ribosomal protein S8e/ribosomal biogenesis NSA2	GO:0003735:structural constituent of ribosome; Molecular Function;GO:0005622:intracellular; Cellular Component;GO:0005840:ribosome; Cellular Component;GO:0006412:translation; Biological Process;
TPGENE09272	10	●		LWGENE20637	BKGENE20729	BMGENE20885	HAGENE20391	JHGENE20436	LAGENE20698	MSGENE20662	PIGENE20455	RCGENE20416	TPGENE09272	LOC100620859	545891159	AK2	7524346	Ak2	34328230	AK2	27806929	adenylate kinase 2, mitochondrial-like; K00939 adenylate kinase [EC:2.7.4.3]	Adenylate kinase 2, mitochondrial OS=Bos taurus GN=AK2 PE=1 SV=2	L8I7D2_BOSMU Uncharacterized protein OS=Bos grunniens mutus GN=M91_13505 PE=3 SV=1	IPR000850:Adenylate kinase;IPR007862:Adenylate kinase, active site lid domain	GO:0004017:adenylate kinase activity; Molecular Function;GO:0005524:ATP binding; Molecular Function;GO:0006139:nucleobase-containing compound metabolic process; Biological Process;GO:0019205:nucleobase-containing compound kinase activity; Molecular Function;
RCGENE02421	10	●		LWGENE01976	BKGENE03213	BMGENE00724	HAGENE05209	JHGENE01473	LAGENE14691	MSGENE15766	PIGENE17735	RCGENE02421	TPGENE06093	OTOL1	335299853	C1QC	56786155	C1qc	113680120	MGC137211	114052108	adiponectin-like; K07296 adiponectin	Protein HP-25 homolog 1 OS=Bos taurus PE=1 SV=1	L8IDF6_BOSMU Protein HP-25-like protein 1 OS=Bos grunniens mutus GN=M91_02265 PE=4 SV=1	IPR001073:Complement C1q protein;IPR008160:Collagen triple helix repeat	\
BMGENE20837	10	●		LWGENE08250	BKGENE20711	BMGENE20837	HAGENE20468	JHGENE20359	LAGENE20728	MSGENE20584	PIGENE20694	RCGENE20320	TPGENE11442	AP3B1	148747342	AP3B1	530379538	Ap3b1	568984207	AP3B1	115496866	AP3B1; adaptor-related protein complex 3, beta 1 subunit; K12397 AP-3 complex subunit beta	AP-3 complex subunit beta-1 OS=Bos taurus GN=AP3B1 PE=2 SV=1	M3X1N9_FELCA Uncharacterized protein OS=Felis catus PE=4 SV=1	IPR026739:AP complex subunit beta;IPR026740:AP-3 complex subunit beta	GO:0016192:vesicle-mediated transport; Biological Process;GO:0030123:AP-3 adaptor complex; Cellular Component;
MSGENE05719	10	●		LWGENE15535	BKGENE04553	BMGENE18310	HAGENE15100	JHGENE17804	LAGENE17441	MSGENE05719	PIGENE04119	RCGENE15351	TPGENE04720	ATP6AP1L	545811683	ATP6AP1	17136148	Atp6ap1	9055172	ATP6AP1	28461231	ATP6AP1; ATPase, H+ transporting, lysosomal accessory protein 1; K03662 V-type H+-transporting ATPase S1 subunit	V-type proton ATPase subunit S1 OS=Homo sapiens GN=ATP6AP1 PE=1 SV=2	K9IWA3_PIG V-type proton ATPase subunit S1 OS=Sus scrofa GN=ATP6AP1 PE=2 SV=1	IPR008388:ATPase, V1 complex, subunit S1;IPR024722:BIG/ATPase V1 complex, subunit S1	GO:0015991:ATP hydrolysis coupled proton transport; Biological Process;GO:0033180:proton-transporting V-type ATPase, V1 domain; Cellular Component;GO:0046933:proton-transporting ATP synthase activity, rotational mechanism; Molecular Function;GO:0046961:proton-transporting ATPase activity, rotational mechanism; Molecular Function;
RCGENE11822	10	●		LWGENE06623	BKGENE07776	BMGENE06892	HAGENE16958	JHGENE17635	LAGENE01996	MSGENE00134	PIGENE04403	RCGENE11822	TPGENE09582	BST2	239916109	BST2	4757876	Bst2	37674242	LOC618737	528954613	BST2; bone marrow stromal cell antigen 2; K06731 bone marrow stromal cell antigen 2	Bone marrow stromal antigen 2 OS=Homo sapiens GN=BST2 PE=1 SV=1	C4NF76_PIG Bone marrow stromal cell antigen 2 OS=Sus scrofa GN=BST2 PE=2 SV=1	IPR024886:Bone marrow stromal antigen 2	GO:0051607:defense response to virus; Biological Process;
TPGENE15776	10	●		LWGENE02102	BKGENE03040	BMGENE15616	HAGENE19724	JHGENE18170	LAGENE06925	MSGENE03605	PIGENE19949	RCGENE00787	TPGENE15776	\	\	C1QBP	4502491	C1qbp	112181167	C1QBP	77736001	C1QBP; complement component 1, q subcomponent binding protein; K15414 complement component 1 Q subcomponent-binding protein, mitochondrial	Complement component 1 Q subcomponent-binding protein, mitochondrial OS=Bos taurus GN=C1QBP PE=2 SV=1	L5JWP0_PTEAL Complement component 1 Q subcomponent-binding protein, mitochondrial OS=Pteropus alecto GN=PAL_GLEAN10010115 PE=4 SV=1	IPR003428:Mitochondrial glycoprotein	GO:0005759:mitochondrial matrix; Cellular Component;
MSGENE17574	10	●		LWGENE16320	BKGENE05749	BMGENE09240	HAGENE01288	JHGENE11873	LAGENE01824	MSGENE17574	PIGENE07119	RCGENE12018	TPGENE04967	C1S	52694689	C1S	530398811	C1s1	755517033	C1S	115497210	C1S; complement component 1, s subcomponent (EC:3.4.21.42); K01331 complement component 1, s subcomponent [EC:3.4.21.42]	Complement C1s subcomponent OS=Sus scrofa PE=2 SV=1	M3YZ96_MUSPF Uncharacterized protein OS=Mustela putorius furo GN=C1S PE=3 SV=1	IPR000436:Sushi/SCR/CCP;IPR000742:Epidermal growth factor-like domain;IPR000859:CUB domain;IPR001254:Peptidase S1;IPR001314:Peptidase S1A, chymotrypsin-type;IPR001881:EGF-like calcium-binding domain	GO:0004252:serine-type endopeptidase activity; Molecular Function;GO:0005509:calcium ion binding; Molecular Function;GO:0005515:protein binding; Molecular Function;GO:0005576:complement c1s subcomponent precursor;GO:0006508:proteolysis; Biological Process;GO:0006958:complement c1s subcomponent precursor;GO:0045087:complement c1s subcomponent precursor;
LWGENE01282	1	●		LWGENE01282	\	\	\	\	\	\	\	\	\	CARD10	545824821	CARD9	47717131	Card9	568913895	CARD9	116004441	CARD9; caspase recruitment domain family, member 9; K12794 caspase recruitment domain-containing protein 9	Caspase recruitment domain-containing protein 9 OS=Homo sapiens GN=CARD9 PE=1 SV=2	F6UIA3_HORSE Uncharacterized protein OS=Equus caballus GN=CARD9 PE=4 SV=1	IPR001315:CARD domain	GO:0005515:protein binding; Molecular Function;GO:0005622:intracellular; Cellular Component;GO:0005737:caspase recruitment domain-containing protein 9;GO:0009620:caspase recruitment domain-containing protein 9;GO:0032494:caspase recruitment domain-containing protein 9;GO:0032495:caspase recruitment domain-containing protein 9;GO:0032755:caspase recruitment domain-containing protein 9;GO:0032760:c…
LWGENE17879	10	●		LWGENE17879	BKGENE05998	BMGENE13364	HAGENE13522	JHGENE02757	LAGENE10974	MSGENE13743	PIGENE08259	RCGENE08796	TPGENE07995	\	\	CD7	5453613	Cd7	6806905	CD7	149642657	CD7; CD7 molecule; K06457 CD7 antigen	T-cell antigen CD7 OS=Homo sapiens GN=CD7 PE=1 SV=1	M5DNE0_PIG CD7 OS=Sus scrofa domesticus GN=CD7 PE=2 SV=1	IPR007110:Immunoglobulin-like domain;IPR013106:Immunoglobulin V-set domain	GO:0005515:protein binding; Molecular Function;
RCGENE05822	10	●		LWGENE03970	BKGENE07405	BMGENE08360	HAGENE07881	JHGENE02969	LAGENE09494	MSGENE11018	PIGENE17001	RCGENE05822	TPGENE03497	CD74	47523292	CD74	10835071	Cd74	29789020	CD74	77736415	CD74; CD74 molecule, major histocompatibility complex, class II invariant chain; K06505 CD74 antigen	HLA class II histocompatibility antigen gamma chain OS=Homo sapiens GN=CD74 PE=1 SV=3	Q764N1_PIG CD74 antigen OS=Sus scrofa GN=cd74 PE=2 SV=1	IPR011988:MHC class II-associated invariant chain, trimerisation;IPR015386:MHC class II-associated invariant chain/CLIP, MHC II-interacting;IPR022339:MHC class II-associated invariant chain	GO:0006886:intracellular protein transport; Biological Process;GO:0006955:immune response; Biological Process;GO:0016020:membrane; Cellular Component;GO:0019882:antigen processing and presentation; Biological Process;GO:0042289:MHC class II protein binding; Molecular Function;
HAGENE20826	9	●		LWGENE20666	BKGENE20801	BMGENE20934	HAGENE20826	JHGENE20782	LAGENE20755	MSGENE20893	PIGENE20804	RCGENE15003	\	CDKN1B	47523690	CDKN1C	4557441	Cdkn1c	568952609	CDKN1C	118150914	CDKN1C; cyclin-dependent kinase inhibitor 1C (p57, Kip2); K09993 cyclin-dependent kinase inhibitor 1C	Cyclin-dependent kinase inhibitor 1C OS=Homo sapiens GN=CDKN1C PE=1 SV=1	I6NCL1_PIG Cyclin-dependent kinase inhibitor 1C OS=Sus scrofa GN=CDKN1C PE=2 SV=1	IPR003175:Cyclin-dependent kinase inhibitor	GO:0004861:cyclin-dependent protein serine/threonine kinase inhibitor activity; Molecular Function;GO:0005634:nucleus; Cellular Component;GO:0007050:cell cycle arrest; Biological Process;
LWGENE17500	10	●		LWGENE17500	BKGENE08272	BMGENE18724	HAGENE02122	JHGENE18559	LAGENE07355	MSGENE15501	PIGENE13219	RCGENE08279	TPGENE06156	CHRNA2	311270400	CHRNA4	4502827	Chrna4	31542393	CHRNA4	300798278	CHRNA4; cholinergic receptor, nicotinic, alpha 4 (neuronal); K04806 nicotinic acetylcholine receptor alpha-4	Neuronal acetylcholine receptor subunit alpha-4 OS=Homo sapiens GN=CHRNA4 PE=1 SV=2	E1BHK0_BOVIN Uncharacterized protein OS=Bos taurus GN=CHRNA4 PE=3 SV=1	IPR002394:Nicotinic acetylcholine receptor;IPR006029:Neurotransmitter-gated ion-channel transmembrane domain;IPR006201:Neurotransmitter-gated ion-channel;IPR006202:Neurotransmitter-gated ion-channel ligand-binding	GO:0001508:neuronal acetylcholine receptor subunit alpha-4 precursor;GO:0001666:neuronal acetylcholine receptor subunit alpha-4 precursor;GO:0004889:acetylcholine-activated cation-selective channel activity; Molecular Function;GO:0005216:ion channel activity; Molecular Function;GO:0005230:extracellular ligand-gated ion channel activity; Molecular Function;GO:0005892:neuronal acetylcholine recepto…
BMGENE08924	10	●		LWGENE00515	BKGENE06732	BMGENE08924	HAGENE03201	JHGENE07684	LAGENE09686	MSGENE19156	PIGENE11702	RCGENE06356	TPGENE00148	APCS	55742849	APCS	4502133	Apcs	226958497	APCS	77735883	CRP; C-reactive protein, pentraxin-related; K16143 C-reactive protein	Serum amyloid P-component OS=Sus scrofa GN=APCS PE=2 SV=1	L8HUW5_BOSMU Serum amyloid P-component OS=Bos grunniens mutus GN=M91_18599 PE=4 SV=1	IPR001759:Pentaxin	GO:0005615:serum amyloid p-component precursor;GO:0031012:serum amyloid p-component precursor;GO:0046872:serum amyloid p-component precursor;
PIGENE14499	5	●		LWGENE11145	BKGENE14639	\	HAGENE09439	\	\	\	PIGENE14499	\	TPGENE18235	CRIP3	194039325	CRIP2	4503049	Crip2	13195646	CRIP2	118601892	CSRP3; cysteine and glycine-rich protein 3 (cardiac LIM protein); K09377 cysteine and glycine-rich protein	Cysteine-rich protein 2 OS=Bos taurus GN=CRIP2 PE=2 SV=1	H0XIU1_OTOGA Uncharacterized protein OS=Otolemur garnettii GN=CRIP2 PE=4 SV=1	IPR001781:Zinc finger, LIM-type	GO:0008270:zinc ion binding; Molecular Function;GO:0046872:cysteine-rich protein 2;
LAGENE14531	10	●		LWGENE11886	BKGENE16122	BMGENE11443	HAGENE02745	JHGENE17087	LAGENE14531	MSGENE04353	PIGENE16359	RCGENE07791	TPGENE01930	CD209	194018704	CLEC4E	7657333	Clec4e	9910162	CLEC4E	76608885	C-type lectin domain family 4 member E-like; K10059 C-type lectin domain family 4 member E	C-type lectin domain family 4 member E OS=Homo sapiens GN=CLEC4E PE=1 SV=1	K9J4R1_PIG C-type lectin domain family 4 member E OS=Sus scrofa GN=CLEC4E PE=2 SV=1	IPR001304:C-type lectin	GO:0030246:carbohydrate binding; Molecular Function;
LWGENE02121	10	●		LWGENE02121	BKGENE09748	BMGENE12874	HAGENE10393	JHGENE05086	LAGENE19990	MSGENE18374	PIGENE01219	RCGENE12968	TPGENE15725	LOC100624570	545829829	CYLD	767989483	Cyld	27734060	CYLD	741958392	CYLD; cylindromatosis (turban tumor syndrome); K08601 ubiquitin thioesterase CYLD [EC:3.1.2.15]	Ubiquitin carboxyl-terminal hydrolase CYLD OS=Bos taurus GN=CYLD PE=2 SV=1	K9IVM8_PIG Ubiquitin carboxyl-terminal hydrolase CYLD isoform 2 OS=Sus scrofa GN=CYLD PE=2 SV=1	IPR000938:CAP Gly-rich domain;IPR001394:Ubiquitin carboxyl-terminal hydrolases family 2	GO:0004221:ubiquitin thiolesterase activity; Molecular Function;GO:0006511:ubiquitin-dependent protein catabolic process; Biological Process;
HAGENE17721	10	●		LWGENE05917	BKGENE04319	BMGENE03320	HAGENE17721	JHGENE15323	LAGENE18681	MSGENE18933	PIGENE15240	RCGENE02657	TPGENE02582	DDIT4	343478232	DDIT4	9506687	Ddit4	21312868	DDIT4	115495515	DDIT4; DNA-damage-inducible transcript 4; K08270 DNA-damage-inducible transcript 4	DNA damage-inducible transcript 4 protein OS=Bos taurus GN=DDIT4 PE=2 SV=1	K9J522_DESRO Putative dna damage-inducible transcript 4 protein (Fragment) OS=Desmodus rotundus PE=2 SV=1	IPR012918:RTP801-like	GO:0005737:cytoplasm; Cellular Component;GO:0009968:negative regulation of signal transduction; Biological Process;
BMGENE17964	10	●		LWGENE18983	BKGENE20123	BMGENE17964	HAGENE19925	JHGENE04130	LAGENE00166	MSGENE11784	PIGENE05793	RCGENE14097	TPGENE14049	DDX42	350590222	DDX41	21071032	Ddx41	270047502	DDX41	129277522	DDX41; DEAD (Asp-Glu-Ala-Asp) box polypeptide 41; K13116 ATP-dependent RNA helicase DDX41 [EC:3.6.4.13]	Probable ATP-dependent RNA helicase DDX41 OS=Homo sapiens GN=DDX41 PE=1 SV=2	K9IVT8_PIG DEAD (Asp-Glu-Ala-Asp) box polypeptide 41 OS=Sus scrofa GN=DDX41 PE=2 SV=1	IPR001650:Helicase, C-terminal;IPR011545:DNA/RNA helicase, DEAD/DEAH box type, N-terminal;IPR014001:Helicase, superfamily 1/2, ATP-binding domain;IPR014014:RNA helicase, DEAD-box type, Q motif	GO:0003676:nucleic acid binding; Molecular Function;GO:0004386:helicase activity; Molecular Function;GO:0005524:ATP binding; Molecular Function;GO:0008026:ATP-dependent helicase activity; Molecular Function;
RCGENE13971	10	●		LWGENE14739	BKGENE04001	BMGENE02967	HAGENE16463	JHGENE15407	LAGENE16518	MSGENE05044	PIGENE16698	RCGENE13971	TPGENE17357	LOC100525721	350594798	DUSP22	557440816	Dusp22	83816915	DUSP22	529004431	DUSP22; dual specificity phosphatase 22; K14165 atypical dual specificity phosphatase [EC:3.1.3.16 3.1.3.48]	Dual specificity protein phosphatase 22 OS=Homo sapiens GN=DUSP22 PE=1 SV=1	G3WR08_SARHA Uncharacterized protein OS=Sarcophilus harrisii GN=DUSP22 PE=4 SV=1	IPR000340:Dual specificity phosphatase, catalytic domain;IPR000387:Protein-tyrosine/Dual specificity phosphatase;IPR020417:Atypical dual specificity phosphatase;IPR020422:Dual specificity phosphatase, subgroup, catalytic domain;IPR024950:Dual specificity phosphatase	GO:0006470:protein dephosphorylation; Biological Process;GO:0008138:protein tyrosine/serine/threonine phosphatase activity; Molecular Function;GO:0016311:dephosphorylation; Biological Process;GO:0016791:phosphatase activity; Molecular Function;
HAGENE13776	1	●		\	\	\	HAGENE13776	\	\	\	\	\	\	EEF2	335282386	EEF2	4503483	Eef2	33859482	EEF2	115497900	elongation factor 2-like; K03234 elongation factor 2	Elongation factor 2 OS=Pongo abelii GN=EEF2 PE=2 SV=3	Q4VRH7_OXYSC Elongation factor 2 OS=Oxyuranus scutellatus scutellatus PE=2 SV=1	IPR009022:Elongation factor G, III-V domain	\
MSGENE19415	10	●		LWGENE08811	BKGENE08933	BMGENE01806	HAGENE18187	JHGENE07757	LAGENE00721	MSGENE19415	PIGENE01945	RCGENE02467	TPGENE03403	\	\	ENDOU	289063433	Endou	568991723	ENDOU	156120827	ENDOU; endonuclease, polyU-specific; K14648 poly(U)-specific endoribonuclease [EC:3.1.-.-]	Poly(U)-specific endoribonuclease OS=Bos taurus GN=ENDOU PE=2 SV=1	F6X504_HORSE Uncharacterized protein OS=Equus caballus GN=ENDOU PE=4 SV=1	IPR001212:Somatomedin B domain;IPR018998:Endoribonuclease XendoU;IPR020436:Somatomedin B, chordata	GO:0003723:poly -specific endoribonuclease;GO:0004521:poly -specific endoribonuclease;GO:0005044:scavenger receptor activity; Molecular Function;GO:0006508:poly -specific endoribonuclease;GO:0006955:immune response; Biological Process;GO:0007565:poly -specific endoribonuclease;GO:0008236:poly -specific endoribonuclease;GO:0016788:hydrolase activity, acting on ester bonds; Molecular Function;GO:00…
JHGENE13916	1	●		\	\	\	\	JHGENE13916	\	\	\	\	\	FCGR2B	545822286	FCGR2B	50511926	Fcgr2b	6857783	FCGR2A	741919202	FCGR2B, CD32; Fc fragment of IgG, low affinity IIb, receptor (CD32); K12560 low affinity immunoglobulin gamma Fc region receptor II-b	Low affinity immunoglobulin gamma Fc region receptor II-a OS=Pan troglodytes GN=FCGR2A PE=2 SV=1	E5G9H6_PIG Fc gamma receptor IIB transcript variant 3 OS=Sus scrofa GN=CD32 PE=2 SV=1	\	\
BMGENE12327	10	●		LWGENE03490	BKGENE15764	BMGENE12327	HAGENE10903	JHGENE14898	LAGENE02106	MSGENE18139	PIGENE05256	RCGENE04970	TPGENE00754	ERG	346986468	FEV	8923789	Fev	23346545	FEV	300797422	Fev, Pet1; FEV (ETS oncogene family); K09437 ETS oncogene family protein FEV	Protein FEV OS=Rattus norvegicus GN=Fev PE=2 SV=2	H0WCZ3_CAVPO Uncharacterized protein OS=Cavia porcellus GN=LOC100723616 PE=3 SV=1	IPR000418:Ets domain	GO:0003700:sequence-specific DNA binding transcription factor activity; Molecular Function;GO:0006355:regulation of transcription, DNA-dependent; Biological Process;GO:0043565:sequence-specific DNA binding; Molecular Function;
HAGENE03858	10	●		LWGENE18924	BKGENE11503	BMGENE15728	HAGENE03858	JHGENE15709	LAGENE15208	MSGENE11476	PIGENE14589	RCGENE07756	TPGENE14380	FST	51036693	FSTL3	5031701	Fstl3	13878203	FSTL3	115496578	follistatin-like; K04661 follistatin	Follistatin-related protein 3 OS=Bos taurus GN=FSTL3 PE=2 SV=1	G3SM98_LOXAF Uncharacterized protein OS=Loxodonta africana GN=LOC100669722 PE=4 SV=1	IPR002350:Kazal domain;IPR003645:Follistatin-like, N-terminal;IPR015369:Follistatin/Osteonectin EGF domain	GO:0001503:follistatin-related protein 3 precursor;GO:0001968:follistatin-related protein 3 precursor;GO:0002244:follistatin-related protein 3 precursor;GO:0005515:protein binding; Molecular Function;GO:0005615:follistatin-related protein 3 precursor;GO:0005634:follistatin-related protein 3 precursor;GO:0022409:follistatin-related protein 3 precursor;GO:0030514:follistatin-related protein 3 precu…
LAGENE15015	10	●		LWGENE14066	BKGENE18423	BMGENE03040	HAGENE04370	JHGENE12732	LAGENE15015	MSGENE14520	PIGENE13158	RCGENE10664	TPGENE09971	FZD5	545875418	FZD8	13994190	Fzd8	242332486	FZD8	741888083	Fzd8, Fz8; frizzled homolog 8 (Drosophila); K02375 frizzled 5/8	Frizzled-8 OS=Mus musculus GN=Fzd8 PE=1 SV=2	F7CDC6_MONDO Uncharacterized protein OS=Monodelphis domestica GN=FZD8 PE=4 SV=1	IPR000539:Frizzled protein;IPR015526:Frizzled/secreted frizzled-related protein;IPR017981:GPCR, family 2-like;IPR020067:Frizzled domain;IPR026545:Frizzled-8	GO:0000122:transmembrane receptor;GO:0001944:transmembrane receptor;GO:0004888:transmembrane signaling receptor activity; Molecular Function;GO:0004930:transmembrane receptor;GO:0005102:transmembrane receptor;GO:0005515:protein binding; Molecular Function;GO:0005794:transmembrane receptor;GO:0005886:transmembrane receptor;GO:0007166:cell surface receptor signaling pathway; Biological Process;GO:0…
LWGENE15452	10	●		LWGENE15452	BKGENE07892	BMGENE00716	HAGENE19131	JHGENE01482	LAGENE02208	MSGENE05395	PIGENE14657	RCGENE02413	TPGENE06102	MB	47523546	MB	530420091	Mb	255708425	MB	27806939	HBZ1, HBZ; hemoglobin, zeta; K13826 hemoglobin subunit zeta	Myoglobin OS=Sus scrofa GN=MB PE=1 SV=2	D2HSS2_AILME Putative uncharacterized protein (Fragment) OS=Ailuropoda melanoleuca GN=PANDA_015141 PE=3 SV=1	IPR000971:Globin;IPR002335:Myoglobin	GO:0005344:myg_pig ame: full=myoglobin;GO:0005506:iron ion binding; Molecular Function;GO:0015671:oxygen transport; Biological Process;GO:0019825:oxygen binding; Molecular Function;GO:0020037:heme binding; Molecular Function;
LWGENE14002	9	●		LWGENE14002	BKGENE05112	BMGENE15499	HAGENE18402	JHGENE16144	LAGENE15783	MSGENE16295	PIGENE01091	RCGENE07251	\	HES2	311258364	HES5	58219048	Hes5	6754182	HES5	157428058	HES5; hairy and enhancer of split 5 (Drosophila); K06055 hairy and enhancer of split 5	Transcription factor HES-5 OS=Rattus norvegicus GN=Hes5 PE=2 SV=1	E2QXY9_CANFA Uncharacterized protein OS=Canis familiaris GN=HES5 PE=4 SV=1	IPR003650:Orange;IPR011598:Myc-type, basic helix-loop-helix (bHLH) domain;IPR018352:Orange subgroup	GO:0000122:transcription factor hes-5;GO:0001078:transcription factor hes-5;GO:0002062:transcription factor hes-5;GO:0003677:DNA binding; Molecular Function;GO:0005634:transcription factor hes-5;GO:0006355:regulation of transcription, DNA-dependent; Biological Process;GO:0006461:transcription factor hes-5;GO:0007155:transcription factor hes-5;GO:0007224:transcription factor hes-5;GO:0021537:trans…
LWGENE17480	10	●		LWGENE17480	BKGENE08288	BMGENE18703	HAGENE02103	JHGENE18541	LAGENE07372	MSGENE04000	PIGENE17326	RCGENE08297	TPGENE06174	LOC102157770	545871109	ADRM1	768015656	Adrm1	568920357	ADRM1	122692585	hypothetical protein; K06691 26S proteasome regulatory subunit N13	Proteasomal ubiquitin receptor ADRM1 OS=Bos taurus GN=ADRM1 PE=2 SV=1	L8INI8_BOSMU Proteasomal ubiquitin receptor ADRM1 OS=Bos grunniens mutus GN=M91_18945 PE=4 SV=1	IPR006773:26S proteasome complex ubiquitin receptor, subunit Rpn13	GO:0005634:nucleus; Cellular Component;GO:0005737:cytoplasm; Cellular Component;
MSGENE16005	1	●		\	\	\	\	\	\	MSGENE16005	\	\	\	LOC100622797	350592637	VPREB1	9507239	Vpreb2	8850240	LOC101906766	741909714	IGLL1; immunoglobulin lambda-like polypeptide 1; K06554 immunoglobulin lambda-like polypeptide 1	Ig lambda chain V-II region MGC OS=Homo sapiens PE=1 SV=1	G1M4J5_AILME Uncharacterized protein OS=Ailuropoda melanoleuca PE=4 SV=1	IPR003596:Immunoglobulin V-set, subgroup;IPR007110:Immunoglobulin-like domain;IPR013106:Immunoglobulin V-set domain	GO:0005515:protein binding; Molecular Function;
LAGENE14414	10	●		LWGENE09887	BKGENE13353	BMGENE15014	HAGENE01147	JHGENE08569	LAGENE14414	MSGENE11095	PIGENE18238	RCGENE03811	TPGENE04457	IL10RB	47523302	IL10RB	24430215	Il10rb	111607428	IL10RB	116004173	IL10RB; interleukin 10 receptor, beta; K05135 interleukin 10 receptor beta	Interleukin-10 receptor subunit beta OS=Homo sapiens GN=IL10RB PE=1 SV=2	Q764M7_PIG Interleukin 10 receptor, beta OS=Sus scrofa GN=IL10RB PE=2 SV=1	IPR015373:Interferon alpha/beta receptor, beta chain	\
BKGENE20492	10	●		LWGENE20560	BKGENE20492	BMGENE20920	HAGENE20694	JHGENE20693	LAGENE20586	MSGENE20625	PIGENE20400	RCGENE20188	TPGENE18962	IL17F	335292243	IL17C	7019435	Il17c	164420675	IL17C	741959050	IL17C; interleukin 17C; K05491 interleukin 17C	Interleukin-17C OS=Homo sapiens GN=IL17C PE=2 SV=1	H2EP70_PIG Interleukin-17C (Fragment) OS=Sus scrofa GN=IL17C PE=2 SV=1	IPR010345:Interleukin-17 family;IPR020440:Interleukin-17, chordata	GO:0005125:cytokine activity; Molecular Function;GO:0005576:extracellular region; Cellular Component;GO:0006954:inflammatory response; Biological Process;
TPGENE07388	10	●		LWGENE15197	BKGENE14984	BMGENE17299	HAGENE15267	JHGENE06612	LAGENE19494	MSGENE17164	PIGENE15663	RCGENE16693	TPGENE07388	ITPKA	311244946	ITPKB	194272161	Itpkb	124487167	ITPKB	741891514	ITPKB; inositol-trisphosphate 3-kinase B; K00911 1D-myo-inositol-triphosphate 3-kinase [EC:2.7.1.127]	Inositol-trisphosphate 3-kinase B OS=Homo sapiens GN=ITPKB PE=1 SV=5	K9IUD1_DESRO Putative 1d-myo-inositol-triphosphate 3-kinase a (Fragment) OS=Desmodus rotundus PE=2 SV=1	IPR005522:Inositol polyphosphate kinase	GO:0008440:inositol-1,4,5-trisphosphate 3-kinase activity; Molecular Function;
MSGENE03673	10	●		LWGENE14710	BKGENE14876	BMGENE02934	HAGENE11426	JHGENE12304	LAGENE17593	MSGENE03673	PIGENE16726	RCGENE13942	TPGENE09633	LY86	148227742	LY86	4758708	Ly86	6754588	LY86	741971809	LY96; lymphocyte antigen 96; K05400 lymphocyte antigen 96	Lymphocyte antigen 86 OS=Homo sapiens GN=LY86 PE=1 SV=1	A3KBF2_PIG MD-1 OS=Sus scrofa GN=MD-1 PE=2 SV=1	IPR003172:MD-2-related lipid-recognition domain	\
BKGENE01010	10	●		LWGENE17103	BKGENE01010	BMGENE18615	HAGENE06818	JHGENE02374	LAGENE09291	MSGENE08563	PIGENE09870	RCGENE06481	TPGENE13132	LOC100623871	545894914	MAEA	62953131	Maea	120407043	MAEA	77735785	macrophage erythroblast attacher-like; K14399 polyribonucleotide 5'-hydroxyl-kinase [EC:2.7.1.78]	Macrophage erythroblast attacher OS=Pongo abelii GN=MAEA PE=2 SV=1	K9IK78_DESRO Uncharacterized protein OS=Desmodus rotundus PE=2 SV=1	IPR006594:LisH dimerisation motif;IPR006595:CTLH, C-terminal LisH motif;IPR013144:CRA domain;IPR024964:CTLH/CRA C-terminal to LisH motif domain	GO:0005515:protein binding; Molecular Function;
LWGENE09450	10	●		LWGENE09450	BKGENE01811	BMGENE06531	HAGENE06121	JHGENE18387	LAGENE00911	MSGENE04658	PIGENE09592	RCGENE06674	TPGENE05923	NR1D2	545861096	NR1D1	13430848	Nr1d1	110625908	NR1D1	118151272	NR1D1; nuclear receptor subfamily 1, group D, member 1; K03728 nuclear receptor subfamily 1 group D member 1	Nuclear receptor subfamily 1 group D member 1 OS=Ovis aries PE=2 SV=1	L5JQB5_PTEAL Nuclear receptor subfamily 1 group D member 1 OS=Pteropus alecto GN=PAL_GLEAN10019601 PE=3 SV=1	IPR000536:Nuclear hormone receptor, ligand-binding, core;IPR001628:Zinc finger, nuclear hormone receptor-type;IPR001723:Steroid hormone receptor	GO:0003677:DNA binding; Molecular Function;GO:0003700:sequence-specific DNA binding transcription factor activity; Molecular Function;GO:0003707:steroid hormone receptor activity; Molecular Function;GO:0005634:nucleus; Cellular Component;GO:0006355:regulation of transcription, DNA-dependent; Biological Process;GO:0008270:zinc ion binding; Molecular Function;GO:0043401:steroid hormone mediated sig…
TPGENE15613	10	●		LWGENE13587	BKGENE08109	BMGENE01564	HAGENE19336	JHGENE18636	LAGENE15924	MSGENE15591	PIGENE14058	RCGENE00004	TPGENE15613	PDCD1	324120925	PDCD1	167857792	Pdcd1	6679239	PDCD1	134085948	PDCD1; programmed cell death 1; K06744 programmed cell death protein 1	Programmed cell death protein 1 OS=Homo sapiens GN=PDCD1 PE=1 SV=3	C1KGT7_BUBBU Programmed death 1 OS=Bubalus bubalis GN=PD-1 PE=2 SV=1	IPR003596:Immunoglobulin V-set, subgroup;IPR003599:Immunoglobulin subtype;IPR007110:Immunoglobulin-like domain;IPR013106:Immunoglobulin V-set domain	GO:0005515:protein binding; Molecular Function;
HAGENE16959	10	●		LWGENE06622	BKGENE07775	BMGENE06891	HAGENE16959	JHGENE17634	LAGENE01995	MSGENE00133	PIGENE04404	RCGENE11823	TPGENE09583	\	\	PLVAP	13775238	Plvap	255522953	PLVAP	78369388	PLVAP; plasmalemma vesicle associated protein; K17309 plasmalemma vesicle-associated protein	Plasmalemma vesicle-associated protein OS=Homo sapiens GN=PLVAP PE=2 SV=1	J9NV39_CANFA Uncharacterized protein OS=Canis familiaris GN=PLVAP PE=4 SV=1	IPR009538:PV-1	\
TPGENE04410	10	●		LWGENE09147	BKGENE17479	BMGENE03624	HAGENE01549	JHGENE02038	LAGENE15406	MSGENE04895	PIGENE08891	RCGENE12355	TPGENE04410	\	\	PPP2R3C	31542242	Ppp2r3c	31560309	PPP2R3C	62751853	PPP2R3C; protein phosphatase 2, regulatory subunit B'', gamma; K11583 serine/threonine-protein phosphatase 2A regulatory subunit B''	Serine/threonine-protein phosphatase 2A regulatory subunit B'' subunit gamma OS=Bos taurus GN=PPP2R3C PE=2 SV=1	L5KL82_PTEAL Serine/threonine-protein phosphatase 2A regulatory subunit B'' subunit gamma OS=Pteropus alecto GN=PAL_GLEAN10008494 PE=4 SV=1	\	\
HAGENE00120	1	●		\	\	\	HAGENE00120	\	\	\	\	\	\	HERC3	350587982	HERC6	61563742	Herc6	60097906	HERC6	741929566	probable E3 ubiquitin-protein ligase HERC4-like; K10615 E3 ubiquitin-protein ligase HERC4 [EC:6.3.2.19]	Probable E3 ubiquitin-protein ligase HERC6 OS=Homo sapiens GN=HERC6 PE=2 SV=2	H0Y9U0_HUMAN Probable E3 ubiquitin-protein ligase HERC6 (Fragment) OS=Homo sapiens GN=HERC6 PE=4 SV=1	IPR000408:Regulator of chromosome condensation, RCC1	GO:0004842:probable e3 ubiquitin-protein ligase herc6;GO:0005622:probable e3 ubiquitin-protein ligase herc6;
TPGENE06153	10	●		LWGENE17503	BKGENE08268	BMGENE18728	HAGENE02125	JHGENE18562	LAGENE07352	MSGENE15497	PIGENE13216	RCGENE08276	TPGENE06153	FRK	311244366	PTK6	5174647	Ptk6	6677971	PTK6	300793845	PTK6; PTK6 protein tyrosine kinase 6; K08894 protein tyrosine kinase 6 [EC:2.7.10.2]	Protein-tyrosine kinase 6 OS=Homo sapiens GN=PTK6 PE=1 SV=1	L8HKD3_BOSMU Protein-tyrosine kinase 6 (Fragment) OS=Bos grunniens mutus GN=M91_04656 PE=4 SV=1	IPR000719:Protein kinase domain;IPR000980:SH2 domain;IPR001245:Serine-threonine/tyrosine-protein kinase catalytic domain;IPR001452:Src homology-3 domain;IPR002290:Serine/threonine- / dual specificity protein kinase, catalytic domain;IPR020635:Tyrosine-protein kinase, catalytic domain	GO:0004672:protein kinase activity; Molecular Function;GO:0004713:protein tyrosine kinase activity; Molecular Function;GO:0005515:protein binding; Molecular Function;GO:0005524:ATP binding; Molecular Function;GO:0006468:protein phosphorylation; Biological Process;
HAGENE20847	10	●		LWGENE20686	BKGENE20835	BMGENE01721	HAGENE20847	JHGENE20774	LAGENE20754	MSGENE06527	PIGENE06853	RCGENE09554	TPGENE10043	SERPINB11	311245223	SERPINB12	767999452	Serpinb12	312837068	SERPINB12	741901644	SERPINB12; serpin peptidase inhibitor, clade B (ovalbumin), member 12; K13966 serpin B11/12	Serpin B12 OS=Homo sapiens GN=SERPINB12 PE=1 SV=1	M3W3X5_FELCA Uncharacterized protein OS=Felis catus GN=SERPINB12 PE=3 SV=1	IPR000215:Serpin family;IPR023796:Serpin domain	GO:0005615:extracellular space; Cellular Component;
LAGENE20790	2	●		LWGENE20717	\	\	\	\	LAGENE20790	\	\	\	\	SERPINB1	350586352	SERPINB4	767999133	Serpinb3a	226958518	LOC100337240	358420938	SERPINB3; serpin peptidase inhibitor, clade B (ovalbumin), member 3; K13963 serpin B	Serpin B4 OS=Homo sapiens GN=SERPINB4 PE=1 SV=2	F6QMA1_HORSE Uncharacterized protein OS=Equus caballus GN=LOC100057505 PE=3 SV=1	IPR000215:Serpin family;IPR023796:Serpin domain	GO:0005615:extracellular space; Cellular Component;
TPGENE05986	10	●		LWGENE13461	BKGENE16018	BMGENE08307	HAGENE13722	JHGENE17160	LAGENE15310	MSGENE10035	PIGENE12171	RCGENE14570	TPGENE05986	SLC11A2	190360609	SLC11A2	295293167	Slc11a2	225903448	SLC11A2	155371937	SLC11A2, DMT1; solute carrier family 11 (proton-coupled divalent metal ion transporters), member 2; K12347 natural resistance-associated macrophage protein	Natural resistance-associated macrophage protein 2 OS=Mus musculus GN=Slc11a2 PE=1 SV=2	B2ZDZ3_PIG Divalent metal ion transporter 1 OS=Sus scrofa GN=DMT1 PE=2 SV=1	IPR001046:Natural resistance-associated macrophage like	GO:0005215:transporter activity; Molecular Function;GO:0006810:transport; Biological Process;GO:0016020:membrane; Cellular Component;
MSGENE05854	10	●		LWGENE16501	BKGENE16177	BMGENE15174	HAGENE09756	JHGENE17295	LAGENE07658	MSGENE05854	PIGENE07241	RCGENE07420	TPGENE07645	SLC7A7	545841384	SLC7A6	767990818	Slc7a6	568957079	SLC7A6	741958335	SLC7A6; solute carrier family 7 (amino acid transporter light chain, y+L system), member 6; K13872 solute carrier family 7 (L-type amino acid transporter), member 6	Y+L amino acid transporter 2 OS=Mus musculus GN=Slc7a6 PE=2 SV=1	L8II36_BOSMU Y+L amino acid transporter 2 OS=Bos grunniens mutus GN=M91_18240 PE=4 SV=1	IPR002293:Amino acid/polyamine transporter I	GO:0003333:amino acid transmembrane transport; Biological Process;GO:0015171:amino acid transmembrane transporter activity; Molecular Function;GO:0016020:membrane; Cellular Component;
MSGENE18111	1	●		\	\	\	\	\	\	MSGENE18111	\	\	\	BTAF1	545871249	SMARCAL1	530370507	Smarcal1	568906695	SMARCAL1	528940158	SMARCAL1; SWI/SNF related, matrix associated, actin dependent regulator of chromatin, subfamily a-like 1; K14440 SWI/SNF-related matrix-associated actin-dependent regulator of chromatin subfamily A-like protein 1 [EC:3.6.4.12]	SWI/SNF-related matrix-associated actin-dependent regulator of chromatin subfamily A-like protein 1 OS=Homo sapiens GN=SMARCAL1 PE=1 SV=1	F7CQY4_MACMU Uncharacterized protein OS=Macaca mulatta GN=SMARCAL1 PE=2 SV=1	IPR000330:SNF2-related;IPR001650:Helicase, C-terminal;IPR014001:Helicase, superfamily 1/2, ATP-binding domain	GO:0003676:nucleic acid binding; Molecular Function;GO:0003677:DNA binding; Molecular Function;GO:0004386:helicase activity; Molecular Function;GO:0005524:ATP binding; Molecular Function;
LAGENE15439	10	●		LWGENE15977	BKGENE10422	BMGENE06653	HAGENE03931	JHGENE09817	LAGENE15439	MSGENE12073	PIGENE08483	RCGENE16853	TPGENE20053	SNX7	545824013	SNX4	4507145	Snx4	18017596	SNX4	122692583	SNX4; sorting nexin 4; K17919 sorting nexin-4	Sorting nexin-4 OS=Bos taurus GN=SNX4 PE=2 SV=1	M3TYT7_PIG Sorting nexin 4 OS=Sus scrofa GN=SNX4 PE=2 SV=1	IPR001683:Phox homologous domain	GO:0005515:protein binding; Molecular Function;GO:0005868:sorting nexin-4;GO:0007154:cell communication; Biological Process;GO:0015031:sorting nexin-4;GO:0031901:sorting nexin-4;GO:0032456:sorting nexin-4;GO:0035091:phosphatidylinositol binding; Molecular Function;
BKGENE20307	9	●		LWGENE17504	BKGENE20307	BMGENE18729	HAGENE20236	JHGENE18563	LAGENE20228	MSGENE15496	PIGENE13215	RCGENE08275	\	FRK	311244366	SRMS	18250298	Srms	54287682	SRMS	300796216	SRMS; src-related kinase lacking C-terminal regulatory tyrosine and N-terminal myristylation sites (EC:2.7.10.2); K08895 tyrosine-protein kinase Srms [EC:2.7.10.2]	Tyrosine-protein kinase Srms OS=Mus musculus GN=Srms PE=1 SV=2	F1N1Q0_BOVIN Uncharacterized protein OS=Bos taurus GN=SRMS PE=4 SV=2	IPR000719:Protein kinase domain;IPR000980:SH2 domain;IPR001245:Serine-threonine/tyrosine-protein kinase catalytic domain;IPR001452:Src homology-3 domain;IPR002290:Serine/threonine- / dual specificity protein kinase, catalytic domain;IPR020635:Tyrosine-protein kinase, catalytic domain	GO:0004672:protein kinase activity; Molecular Function;GO:0004713:protein tyrosine kinase activity; Molecular Function;GO:0005515:protein binding; Molecular Function;GO:0005524:ATP binding; Molecular Function;GO:0006468:protein phosphorylation; Biological Process;
TPGENE04719	10	●		LWGENE15536	BKGENE04554	BMGENE18311	HAGENE15101	JHGENE17805	LAGENE17442	MSGENE05720	PIGENE04118	RCGENE15350	TPGENE04719	\	\	TAZ	31317259	Taz	569010567	TAZ	61852392	TAZ; tafazzin; K13511 monolysocardiolipin acyltransferase [EC:2.3.1.-]	Tafazzin OS=Saimiri sciureus GN=TAZ PE=3 SV=1	H9ES44_MACMU Tafazzin isoform 2 OS=Macaca mulatta GN=TAZ PE=2 SV=1	IPR000872:Tafazzin;IPR002123:Phospholipid/glycerol acyltransferase	GO:0008152:metabolic process; Biological Process;GO:0016021:tafazzin isoform 2;GO:0016746:transferase activity, transferring acyl groups; Molecular Function;
TPGENE10610	10	●		LWGENE10999	BKGENE10234	BMGENE09840	HAGENE10480	JHGENE05132	LAGENE18470	MSGENE02431	PIGENE06043	RCGENE14857	TPGENE10610	\	\	THOC5	50959115	Thoc5	27369587	THOC5	741957101	THOC5; THO complex 5; K13174 THO complex subunit 5	THO complex subunit 5 homolog OS=Homo sapiens GN=THOC5 PE=1 SV=2	M3VHA1_PIG THO complex 5 tv2 OS=Sus scrofa GN=THOC5 PE=2 SV=1	IPR019163:THO complex, subunit 5	GO:0000445:tho complex subunit 5 homolog;GO:0030224:tho complex subunit 5 homolog;GO:0045111:tho complex subunit 5 homolog;GO:0045650:tho complex subunit 5 homolog;GO:0046784:tho complex subunit 5 homolog;GO:0060215:tho complex subunit 5 homolog;
LWGENE20660	10	●		LWGENE20660	BKGENE20819	BMGENE20916	HAGENE20790	JHGENE20808	LAGENE20760	MSGENE20881	PIGENE20806	RCGENE20595	TPGENE20449	\	\	TNFRSF13C	16445027	Tnfrsf13c	16306481	TNFRSF13C	300793809	TNFRSF13C; tumor necrosis factor receptor superfamily member 13C-like; K05151 tumor necrosis factor receptor superfamily member 13C	Tumor necrosis factor receptor superfamily member 13C OS=Homo sapiens GN=TNFRSF13C PE=1 SV=1	H9KVT2_CALJA Uncharacterized protein OS=Callithrix jacchus GN=TNFRSF13C PE=4 SV=1	IPR015336:Tumour necrosis factor receptor 13C, TALL-1 binding domain;IPR022338:Tumour necrosis factor receptor 13C	GO:0001782:tumor necrosis factor receptor superfamily member 13c;GO:0002636:tumor necrosis factor receptor superfamily member 13c;GO:0009897:tumor necrosis factor receptor superfamily member 13c;GO:0030890:tumor necrosis factor receptor superfamily member 13c;GO:0031295:tumor necrosis factor receptor superfamily member 13c;GO:0031296:tumor necrosis factor receptor superfamily member 13c;GO:004210…
JHGENE13819	10	●		LWGENE13028	BKGENE12724	BMGENE06064	HAGENE09973	JHGENE13819	LAGENE11883	MSGENE17908	PIGENE07032	RCGENE03584	TPGENE01341	TRIM6	545847244	TRIM38	5454014	Trim38	755544214	TRIM38	77736095	TRIM38; tripartite motif containing 38; K12014 tripartite motif-containing protein 38	Tripartite motif-containing protein 38 OS=Bos taurus GN=TRIM38 PE=2 SV=1	K9J6H5_PIG Tripartite motif containing 38 OS=Sus scrofa GN=TRIM38 PE=2 SV=1	IPR000315:Zinc finger, B-box;IPR001841:Zinc finger, RING-type;IPR001870:B30.2/SPRY domain;IPR003877:SPla/RYanodine receptor SPRY;IPR003879:Butyrophylin-like;IPR006574:SPRY-associated;IPR018355:SPla/RYanodine receptor subgroup	GO:0005515:protein binding; Molecular Function;GO:0005622:intracellular; Cellular Component;GO:0008270:zinc ion binding; Molecular Function;
TPGENE19868	10	●		LWGENE02795	BKGENE09623	BMGENE02138	HAGENE02764	JHGENE06238	LAGENE07215	MSGENE03511	PIGENE16886	RCGENE15007	TPGENE19868	\	\	TSPAN32	767965199	Tspan32	189339194	TSPAN32	741980643	TSPAN32; tetraspanin 32; K17359 tetraspanin-32	Tetraspanin-32 OS=Homo sapiens GN=TSPAN32 PE=2 SV=1	J9P977_CANFA Uncharacterized protein OS=Canis familiaris GN=TSPAN32 PE=4 SV=1	IPR018499:Tetraspanin/Peripherin	GO:0016021:integral to membrane; Cellular Component;
JHGENE19148	1	●		\	\	\	\	JHGENE19148	\	\	\	\	\	WNT5A	545862886	WNT5B	767971492	Wnt5b	415702185	WNT5B	329663712	WNT5B; wingless-type MMTV integration site family, member 5B; K00444 wingless-type MMTV integration site family, member 5	Protein Wnt-5b OS=Pongo abelii GN=WNT5B PE=2 SV=1	G3H870_CRIGR Protein Wnt OS=Cricetulus griseus GN=I79_006568 PE=3 SV=1	IPR005817:Wnt;IPR026537:Wnt-5b protein	GO:0005102:receptor binding; Molecular Function;GO:0005576:extracellular region; Cellular Component;GO:0005578:protein wnt-5b;GO:0007275:multicellular organismal development; Biological Process;GO:0016055:Wnt receptor signaling pathway; Biological Process;
BMGENE20063	10	●		LWGENE19972	BKGENE10638	BMGENE20063	HAGENE09470	JHGENE11511	LAGENE03122	MSGENE04515	PIGENE10062	RCGENE19494	TPGENE05427	FYN	122891858	YES1	767997877	Yes1	6678617	YES1	155371851	YES1; v-yes-1 Yamaguchi sarcoma viral oncogene homolog 1; K05705 tyrosine-protein kinase Yes [EC:2.7.10.2]	Tyrosine-protein kinase Yes OS=Homo sapiens GN=YES1 PE=1 SV=3	M3WB17_FELCA Uncharacterized protein OS=Felis catus GN=YES1 PE=4 SV=1	IPR000719:Protein kinase domain;IPR000980:SH2 domain;IPR001245:Serine-threonine/tyrosine-protein kinase catalytic domain;IPR001452:Src homology-3 domain;IPR002290:Serine/threonine- / dual specificity protein kinase, catalytic domain;IPR020635:Tyrosine-protein kinase, catalytic domain	GO:0004672:protein kinase activity; Molecular Function;GO:0004713:protein tyrosine kinase activity; Molecular Function;GO:0005515:protein binding; Molecular Function;GO:0005524:ATP binding; Molecular Function;GO:0006468:protein phosphorylation; Biological Process;
BKGENE04786	10		●	LWGENE03604	BKGENE04786	BMGENE00212	HAGENE08548	JHGENE07123	LAGENE02581	MSGENE07307	PIGENE00146	RCGENE07120	TPGENE11117	INSIG2	194018694	INSIG2	767918407	Insig2	568909704	INSIG2	359063126	\	Insulin-induced gene 2 protein OS=Sus scrofa GN=INSIG2 PE=2 SV=2	D2DXL3_PIG INSIG2 OS=Sus scrofa PE=4 SV=1	IPR009904:Insulin-induced protein;IPR025929:Insulin-induced protein family	GO:0005789:insulin-induced gene 2 protein;GO:0008203:insulin-induced gene 2 protein;GO:0016021:insulin-induced gene 2 protein;
BMGENE12764	10		●	LWGENE05457	BKGENE08448	BMGENE12764	HAGENE07524	JHGENE01600	LAGENE09795	MSGENE01443	PIGENE06495	RCGENE10867	TPGENE02946	\	\	TCF20	768057202	Tcf20	755551338	TCF20	528951593	\	Transcription factor 20 OS=Homo sapiens GN=TCF20 PE=1 SV=3	M3TYV9_PIG Transcription factor 20 (AR1) tv2 OS=Sus scrofa GN=TCF20 PE=2 SV=1	\	GO:0008270:transcription factor 20-like;
LWGENE02113	10		●	LWGENE02113	BKGENE01512	BMGENE12882	HAGENE05695	JHGENE08479	LAGENE10613	MSGENE18382	PIGENE01211	RCGENE10566	TPGENE00582	FTO	162951815	FTO	122937263	Fto	166851822	FTO	147900662	\	Alpha-ketoglutarate-dependent dioxygenase FTO OS=Pongo abelii GN=FTO PE=2 SV=1	F1PLN3_CANFA Uncharacterized protein OS=Canis familiaris GN=FTO PE=4 SV=2	IPR024366:Alpha-ketoglutarate-dependent dioxygenase FTO, C-terminal;IPR024367:Alpha-ketoglutarate-dependent dioxygenase FTO, catalytic domain	\
RCGENE12845	10		●	LWGENE15106	BKGENE13886	BMGENE15386	HAGENE12913	JHGENE14478	LAGENE14224	MSGENE09190	PIGENE04041	RCGENE12845	TPGENE20450	VGF	545894253	VGF	767948668	Vgf	86476054	VGF	741902502	\	Neurosecretory protein VGF OS=Bos taurus GN=VGF PE=1 SV=2	M3Z7S6_MUSPF Uncharacterized protein OS=Mustela putorius furo GN=Vgf PE=4 SV=1	IPR026128:Neurosecretory protein VGF	GO:0001541:low quality protein: neurosecretory protein vgf;GO:0002021:low quality protein: neurosecretory protein vgf;GO:0005184:neuropeptide hormone activity; Molecular Function;GO:0005615:low quality protein: neurosecretory protein vgf;GO:0006091:low quality protein: neurosecretory protein vgf;GO:0009409:low quality protein: neurosecretory protein vgf;GO:0019953:low quality protein: neurosecret…
MSGENE08367	10		●	LWGENE06393	BKGENE15437	BMGENE02757	HAGENE08426	JHGENE09683	LAGENE06045	MSGENE08367	PIGENE06785	RCGENE02730	TPGENE10240	ACOT12	350580900	ACOT11	22165400	Acot11	568929288	ACOT12	300797506	ACOT11; acyl-CoA thioesterase 11; K12417 acyl-CoA thioesteraes 11 [EC:3.1.2.-]	Acyl-coenzyme A thioesterase 11 OS=Mus musculus GN=Acot11 PE=2 SV=1	I2CW57_MACMU Acyl-coenzyme A thioesterase 11 isoform 2 OS=Macaca mulatta GN=ACOT11 PE=2 SV=1	IPR002913:START domain;IPR006683:Thioesterase superfamily	\
TPGENE07026	10		●	LWGENE07903	BKGENE04689	BMGENE04462	HAGENE09819	JHGENE05483	LAGENE03063	MSGENE13577	PIGENE08570	RCGENE11154	TPGENE07026	ALDOC	545859339	ALDOA	342187211	Aldoa	568949348	ALDOA	529006907	ALDOA; aldolase A, fructose-bisphosphate; K01623 fructose-bisphosphate aldolase, class I [EC:4.1.2.13]	Fructose-bisphosphate aldolase A OS=Homo sapiens GN=ALDOA PE=1 SV=2	L8INZ1_BOSMU Fructose-bisphosphate aldolase OS=Bos grunniens mutus GN=M91_15154 PE=3 SV=1	IPR000741:Fructose-bisphosphate aldolase, class-I	GO:0004332:fructose-bisphosphate aldolase activity; Molecular Function;GO:0006096:glycolysis; Biological Process;
LWGENE13829	10		●	LWGENE13829	BKGENE09546	BMGENE14323	HAGENE07969	JHGENE12949	LAGENE04095	MSGENE09551	PIGENE10762	RCGENE05653	TPGENE08478	CMKLR1	178056640	APLNR	4885057	Aplnr	6753014	APLNR	156523160	APLNR; apelin receptor; K04174 apelin receptor	Apelin receptor OS=Macaca mulatta GN=APLNR PE=3 SV=1	G1TQW6_RABIT Uncharacterized protein OS=Oryctolagus cuniculus GN=APLNR PE=3 SV=1	IPR000276:G protein-coupled receptor, rhodopsin-like;IPR003904:APJ receptor;IPR017452:GPCR, rhodopsin-like, 7TM	GO:0004930:G-protein coupled receptor activity; Molecular Function;GO:0007186:G-protein coupled receptor signaling pathway; Biological Process;GO:0016021:integral to membrane; Cellular Component;
PIGENE14189	1		●	\	\	\	\	\	\	\	PIGENE14189	\	\	DFNB31	545804164	DFNB31	767956946	Whrn	755506884	DFNB31	359068577	ATP-binding cassette sub-family C member 8-like; K05032 ATP-binding cassette subfamily C (CFTR/MRP) member 8	Whirlin OS=Homo sapiens GN=DFNB31 PE=1 SV=3	E1B914_BOVIN Uncharacterized protein OS=Bos taurus GN=LOC533033 PE=4 SV=2	IPR001478:PDZ domain	GO:0005515:protein binding; Molecular Function;
TPGENE01349	10		●	LWGENE13020	BKGENE12716	BMGENE06072	HAGENE09965	JHGENE13811	LAGENE11875	MSGENE17916	PIGENE07024	RCGENE03576	TPGENE01349	LOC100626428	545893598	HFE	4504377	Hfe	31981697	HFE	59958366	BOLA class I histocompatibility antigen, alpha chain BL3-7-like; K06751 major histocompatibility complex, class I	Hereditary hemochromatosis protein homolog OS=Dicerorhinus sumatrensis GN=HFE PE=2 SV=1	I7EV34_TURTR Hemochromatosis (Fragment) OS=Tursiops truncatus GN=HFE PE=2 SV=1	IPR001039:MHC class I alpha chain, alpha1 alpha2 domains;IPR003597:Immunoglobulin C1-set;IPR007110:Immunoglobulin-like domain;IPR027648:MHC class I alpha chain	GO:0001916:positive regulation of T cell mediated cytotoxicity; Biological Process;GO:0002474:antigen processing and presentation of peptide antigen via MHC class I; Biological Process;GO:0005515:protein binding; Molecular Function;GO:0006955:immune response; Biological Process;GO:0019882:antigen processing and presentation; Biological Process;GO:0042605:peptide antigen binding; Molecular Functio…
BKGENE02456	9		●	LWGENE13566	BKGENE02456	BMGENE01543	HAGENE19356	JHGENE18657	LAGENE13771	MSGENE12658	PIGENE09086	RCGENE00025	\	CAPN10	113205566	CAPN10	13186302	Capn10	87080823	CAPN10	741875628	CAPN10; calpain 10; K08579 calpain-10 [EC:3.4.22.-]	Calpain-10 OS=Homo sapiens GN=CAPN10 PE=2 SV=2	B0FGU0_PIG Calpain 10 isoform 1 OS=Sus scrofa ussuricus GN=CAPN10 PE=2 SV=1	IPR000276:G protein-coupled receptor, rhodopsin-like;IPR001300:Peptidase C2, calpain, catalytic domain;IPR017452:GPCR, rhodopsin-like, 7TM;IPR022682:Peptidase C2, calpain, large subunit, domain III;IPR022683:Peptidase C2, calpain, domain III;IPR022684:Peptidase C2, calpain family	GO:0004198:calcium-dependent cysteine-type endopeptidase activity; Molecular Function;GO:0004930:G-protein coupled receptor activity; Molecular Function;GO:0005622:intracellular; Cellular Component;GO:0006508:proteolysis; Biological Process;GO:0007186:G-protein coupled receptor signaling pathway; Biological Process;GO:0016021:integral to membrane; Cellular Component;
HAGENE14787	10		●	LWGENE14134	BKGENE18924	BMGENE19983	HAGENE14787	JHGENE18182	LAGENE08011	MSGENE19912	PIGENE03663	RCGENE12581	TPGENE09899	KCTD1	545835342	KCTD15	768011011	Kctd15	568945613	KCTD15	741959140	carbohydrate sulfotransferase 8-like; K09672 carbohydrate 4-sulfotransferase 8 [EC:2.8.2.-]	BTB/POZ domain-containing protein KCTD15 OS=Bos taurus GN=KCTD15 PE=2 SV=1	M3Y851_MUSPF Uncharacterized protein OS=Mustela putorius furo GN=Kctd15 PE=4 SV=1	IPR000210:BTB/POZ-like;IPR003131:Potassium channel tetramerisation-type BTB domain	GO:0005515:protein binding; Molecular Function;GO:0051260:protein homooligomerization; Biological Process;
JHGENE18528	1		●	\	\	\	\	JHGENE18528	\	\	\	\	\	\	\	CBS	768021884	Cbs	405778333	CBS	741915417	CBS; cystathionine-beta-synthase; K01697 cystathionine beta-synthase [EC:4.2.1.22]	Cystathionine beta-synthase OS=Macaca fascicularis GN=CBS PE=2 SV=3	L8Y230_TUPCH Cystathionine beta-synthase OS=Tupaia chinensis GN=TREES_T100005961 PE=4 SV=1	\	\
LWGENE20682	10		●	LWGENE20682	BKGENE20799	BMGENE20919	HAGENE20811	JHGENE20785	LAGENE20751	MSGENE20867	PIGENE20793	RCGENE20643	TPGENE20438	\	\	UCN	4507803	Ucn	12025528	UCN	741943649	CRH, corticoliberin; corticotropin releasing hormone; K05256 corticotropin-releasing hormone	Urocortin OS=Homo sapiens GN=UCN PE=1 SV=1	F8R6K7_PIG Urocortin OS=Sus scrofa GN=UCN PE=4 SV=1	IPR000187:Corticotropin-releasing factor, CRF;IPR003620:Urocortin/corticotropin-releasing factor	GO:0005179:hormone activity; Molecular Function;GO:0005576:extracellular region; Cellular Component;
TPGENE18961	10		●	LWGENE15724	BKGENE05925	BMGENE09201	HAGENE15323	JHGENE15464	LAGENE13820	MSGENE10080	PIGENE02267	RCGENE03380	TPGENE18961	CYBA	47523608	CYBA	68509914	Cyba	160948588	CYBA	27806669	CYBA, P22-PHOX, p22phox; cytochrome b-245, alpha polypeptide; K08009 cytochrome b-245, alpha polypeptide	Cytochrome b-245 light chain OS=Sus scrofa GN=CYBA PE=2 SV=2	L8IUE5_BOSMU Cytochrome b-245 light chain OS=Bos grunniens mutus GN=M91_08294 PE=4 SV=1	IPR007732:Cytochrome b558 alpha-subunit	GO:0005886:cytochrome b-245 light chain;GO:0016491:cytochrome b-245 light chain;GO:0020037:heme binding; Molecular Function;GO:0022900:cytochrome b-245 light chain;GO:0046872:cytochrome b-245 light chain;
LAGENE10424	10		●	LWGENE13166	BKGENE08035	BMGENE19365	HAGENE02391	JHGENE03174	LAGENE10424	MSGENE16449	PIGENE16684	RCGENE10652	TPGENE09794	CYP19A3	47523920	CYP19A1	13904860	Cyp19a1	755529734	CYP19A1	741940634	CYP19A3; cytochrome P450 19A3 (EC:1.14.14.14); K07434 aromatase [EC:1.14.14.14]	Cytochrome P450 19 type III OS=Sus scrofa GN=CYP19A3 PE=2 SV=2	Q9TSH1_PIG Type III cytochrome p450 aromatase (Fragment) OS=Sus scrofa PE=3 SV=1	IPR001128:Cytochrome P450;IPR002401:Cytochrome P450, E-class, group I	GO:0005506:iron ion binding; Molecular Function;GO:0009055:electron carrier activity; Molecular Function;GO:0016020:cytochrome p450 19 type iii;GO:0016705:oxidoreductase activity, acting on paired donors, with incorporation or reduction of molecular oxygen; Molecular Function;GO:0020037:heme binding; Molecular Function;GO:0055114:oxidation-reduction process; Biological Process;GO:0070330:cytochro…
RCGENE13888	10		●	LWGENE20140	BKGENE20306	BMGENE20410	HAGENE20283	JHGENE13657	LAGENE20255	MSGENE14849	PIGENE20241	RCGENE13888	TPGENE08353	CYP11A1	47523912	CYP11B2	119829183	Cyp11b2	226823208	CYP11B1	31982391	cytochrome P450 11B1, mitochondrial-like; K00497 steroid 11beta-monooxygenase [EC:1.14.15.4]	Cytochrome P450 11B1, mitochondrial OS=Sus scrofa GN=CYP11B1 PE=2 SV=1	F1MG97_BOVIN Cytochrome P450 11B1, mitochondrial OS=Bos taurus GN=CYP11B1 PE=3 SV=2	IPR001128:Cytochrome P450;IPR002401:Cytochrome P450, E-class, group I	GO:0004507:c11b1_pig ame: full=cytochrome p450 mitochondrial ame: full=cypxib1 ame: full=cytochrome p450c11 ame: full=steroid 11-beta-hydroxylase flags: precursor;GO:0005506:iron ion binding; Molecular Function;GO:0006694:c11b1_pig ame: full=cytochrome p450 mitochondrial ame: full=cypxib1 ame: full=cytochrome p450c11 ame: full=steroid 11-beta-hydroxylase flags: precursor;GO:0009055:electron carri…
MSGENE08570	1		●	\	\	\	\	\	\	MSGENE08570	\	\	\	FGFR2	153792303	FGFR3	254028242	Fgfr3	568933752	FGFR3	27805803	FGFR3; fibroblast growth factor receptor 3; K05094 fibroblast growth factor receptor 3 [EC:2.7.10.1]	Fibroblast growth factor receptor 3 OS=Homo sapiens GN=FGFR3 PE=1 SV=1	F7FZS3_MACMU Fibroblast growth factor receptor OS=Macaca mulatta GN=FGFR3 PE=2 SV=1	IPR000719:Protein kinase domain;IPR001245:Serine-threonine/tyrosine-protein kinase catalytic domain;IPR002290:Serine/threonine- / dual specificity protein kinase, catalytic domain;IPR003598:Immunoglobulin subtype 2;IPR003599:Immunoglobulin subtype;IPR007110:Immunoglobulin-like domain;IPR013098:Immunoglobulin I-set;IPR020635:Tyrosine-protein kinase, catalytic domain;IPR028176:Fibroblast growth fac…	GO:0001501:skeletal system development; Biological Process;GO:0004672:protein kinase activity; Molecular Function;GO:0004713:protein tyrosine kinase activity; Molecular Function;GO:0005007:fibroblast growth factor-activated receptor activity; Molecular Function;GO:0005515:protein binding; Molecular Function;GO:0005524:ATP binding; Molecular Function;GO:0006468:protein phosphorylation; Biological …
TPGENE09077	10		●	LWGENE06696	BKGENE12883	BMGENE08699	HAGENE00388	JHGENE06570	LAGENE01273	MSGENE03335	PIGENE02117	RCGENE08904	TPGENE09077	\	\	FLCN	22907034	Flcn	755538120	FLCN	78369163	FLCN, BHD; folliculin; K09594 folliculin	Folliculin OS=Bos taurus GN=FLCN PE=2 SV=1	G3TEA2_LOXAF Uncharacterized protein OS=Loxodonta africana GN=FLCN PE=4 SV=1	IPR021713:Folliculin	GO:0001932:PREDICTED: folliculin [Loxodonta africana];GO:0005634:PREDICTED: folliculin [Loxodonta africana];GO:0005737:PREDICTED: folliculin [Loxodonta africana];GO:0005886:PREDICTED: folliculin [Loxodonta africana];
MSGENE05440	10		●	LWGENE16037	BKGENE01717	BMGENE17242	HAGENE05146	JHGENE07142	LAGENE04535	MSGENE05440	PIGENE04996	RCGENE01592	TPGENE06311	G6PC	164664458	G6PC	393537031	G6pc	31982353	G6PC	115497704	G6PC; glucose-6-phosphatase, catalytic subunit (EC:3.1.3.9); K01084 glucose-6-phosphatase [EC:3.1.3.9]	Glucose-6-phosphatase OS=Felis catus GN=G6PC PE=2 SV=1	D7EZN7_PIG Glucose-6-phosphatase catalytic subunit OS=Sus scrofa GN=G6PC PE=2 SV=1	IPR000326:Phosphatidic acid phosphatase type 2/haloperoxidase	GO:0003824:catalytic activity; Molecular Function;GO:0016020:membrane; Cellular Component;
BMGENE08705	10		●	LWGENE06702	BKGENE12877	BMGENE08705	HAGENE00382	JHGENE19185	LAGENE01277	MSGENE03341	PIGENE02123	RCGENE08910	TPGENE09083	\	\	RAI1	40807477	Rai1	83649747	RAI1	741963294	GA17728 gene product from transcript GA17728-RA; K09188 histone-lysine N-methyltransferase MLL3 [EC:2.1.1.43]	Retinoic acid-induced protein 1 OS=Homo sapiens GN=RAI1 PE=1 SV=2	E2RE72_CANFA Uncharacterized protein OS=Canis familiaris GN=RAI1 PE=4 SV=2	\	\
TPGENE12173	10		●	LWGENE17855	BKGENE06022	BMGENE13339	HAGENE12688	JHGENE02733	LAGENE10950	MSGENE13768	PIGENE08283	RCGENE08771	TPGENE12173	GLP1R	375268770	GCGR	578832000	Gcgr	755537355	GCGR	528996868	GCGR; glucagon receptor; K04583 glucagon receptor	Glucagon receptor OS=Homo sapiens GN=GCGR PE=1 SV=1	G1RH24_NOMLE Uncharacterized protein OS=Nomascus leucogenys GN=GCGR PE=3 SV=1	IPR000832:GPCR, family 2, secretin-like;IPR001879:GPCR, family 2, extracellular hormone receptor domain;IPR003290:GPCR, family 2, glucagon-like peptide-1/glucagon receptor;IPR003291:GPCR, family 2, glucagon receptor;IPR017981:GPCR, family 2-like	GO:0004871:glucagon receptor;GO:0004888:transmembrane signaling receptor activity; Molecular Function;GO:0004930:G-protein coupled receptor activity; Molecular Function;GO:0004967:glucagon receptor activity; Molecular Function;GO:0007166:cell surface receptor signaling pathway; Biological Process;GO:0007186:G-protein coupled receptor signaling pathway; Biological Process;GO:0016020:membrane; Cell…
TPGENE14464	10		●	LWGENE17884	BKGENE00898	BMGENE02828	HAGENE19114	JHGENE08610	LAGENE05501	MSGENE05786	PIGENE18463	RCGENE12820	TPGENE14464	GAD1	47522694	GAD1	767917467	Gad1	568915465	LOC529488	529005664	glutamate decarboxylase 1-like; K01580 glutamate decarboxylase [EC:4.1.1.15]	Glutamate decarboxylase 1 OS=Pan troglodytes GN=GAD1 PE=2 SV=1	F1MR88_BOVIN Uncharacterized protein (Fragment) OS=Bos taurus GN=LOC529488 PE=3 SV=1	IPR002129:Pyridoxal phosphate-dependent decarboxylase	GO:0016831:carboxy-lyase activity; Molecular Function;GO:0019752:carboxylic acid metabolic process; Biological Process;GO:0030170:pyridoxal phosphate binding; Molecular Function;
PIGENE16491	10		●	LWGENE01280	BKGENE16926	BMGENE13856	HAGENE14890	JHGENE09174	LAGENE02454	MSGENE13906	PIGENE16491	RCGENE12892	TPGENE11236	GPSM2	350583570	GPSM1	525313748	Gpsm1	32189378	GPSM1	297480850	GPSM1; G-protein signaling modulator 1; K15839 G-protein signaling modulator 1	G-protein-signaling modulator 1 OS=Rattus norvegicus GN=Gpsm1 PE=1 SV=2	G3N266_BOVIN Uncharacterized protein OS=Bos taurus GN=GPSM1 PE=4 SV=1	IPR001440:Tetratricopeptide TPR-1;IPR003109:GoLoco motif;IPR013026:Tetratricopeptide repeat-containing domain;IPR019734:Tetratricopeptide repeat;IPR024804:G-protein-signaling modulator 1	GO:0005092:GDP-dissociation inhibitor activity; Molecular Function;GO:0005515:protein binding; Molecular Function;GO:0005634:g-protein-signaling modulator 1;GO:0005794:g-protein-signaling modulator 1;GO:0008277:regulation of G-protein coupled receptor protein signaling pathway; Biological Process;GO:0030695:GTPase regulator activity; Molecular Function;
RCGENE08299	10		●	LWGENE17478	BKGENE12203	BMGENE18701	HAGENE02101	JHGENE18539	LAGENE07374	MSGENE18470	PIGENE17324	RCGENE08299	TPGENE06176	HRH4	47523052	HRH3	530417806	Hrh3	19527066	HRH3	741888533	HRH3; histamine receptor H3; K04151 histamine receptor H3	Histamine H3 receptor OS=Cavia porcellus GN=HRH3 PE=2 SV=2	Q5G535_PHOSU Histamine H3 receptor long form OS=Phodopus sungorus PE=2 SV=1	IPR000276:G protein-coupled receptor, rhodopsin-like;IPR003980:Histamine H3 receptor;IPR017452:GPCR, rhodopsin-like, 7TM	GO:0001505:regulation of neurotransmitter levels; Biological Process;GO:0004930:G-protein coupled receptor activity; Molecular Function;GO:0004969:histamine receptor activity; Molecular Function;GO:0007186:G-protein coupled receptor signaling pathway; Biological Process;GO:0016021:integral to membrane; Cellular Component;
TPGENE20419	10		●	LWGENE20685	BKGENE11408	BMGENE20943	HAGENE20824	JHGENE20827	LAGENE20744	MSGENE20872	PIGENE10179	RCGENE20592	TPGENE20419	\	\	IL11	10834994	Il11	6680393	IL11	741961349	IL11; interleukin 11; K05417 interleukin 11	Interleukin-11 OS=Rattus norvegicus GN=Il11 PE=2 SV=1	M3W4F9_FELCA Uncharacterized protein OS=Felis catus GN=IL11 PE=4 SV=1	IPR020412:Interleukin-11, mammalian;IPR020438:Interleukin-11	\
TPGENE17751	10		●	LWGENE00199	BKGENE20738	BMGENE20476	HAGENE03360	JHGENE18683	LAGENE18265	MSGENE20815	PIGENE20564	RCGENE18493	TPGENE17751	IL1RN	55742626	IL1RN	27894319	Il1rn	13624317	IL1RN	27805939	IL1RN, IRAP1; interleukin 1 receptor antagonist; K05481 interleukin 1 receptor antagonist	Interleukin-1 receptor antagonist protein OS=Sus scrofa GN=IL1RN PE=2 SV=1	G1LW10_AILME Uncharacterized protein OS=Ailuropoda melanoleuca GN=LOC100480371 PE=3 SV=1	IPR000975:Interleukin-1;IPR003297:Interleukin-1 receptor antagonist / Interleukin-36;IPR027166:Interleukin-1 receptor antagonist protein	GO:0005149:interleukin-1 receptor binding; Molecular Function;GO:0005152:interleukin-1 receptor antagonist activity; Molecular Function;GO:0005615:extracellular space; Cellular Component;
MSGENE12789	10		●	LWGENE14746	BKGENE11157	BMGENE04747	HAGENE17320	JHGENE19711	LAGENE04324	MSGENE12789	PIGENE00020	RCGENE11592	TPGENE09452	INHBB	258690271	INHBB	154813204	Inhbb	74315992	INHBB	28849937	INHBB; inhibin, beta B; K04667 inhibin, beta	Inhibin beta B chain OS=Sus scrofa GN=INHBB PE=1 SV=2	G3RRA8_GORGO Uncharacterized protein OS=Gorilla gorilla gorilla GN=INHBB PE=3 SV=1	IPR000381:Inhibin, beta B subunit;IPR001111:Transforming growth factor-beta, N-terminal;IPR001839:Transforming growth factor-beta, C-terminal;IPR015615:Transforming growth factor-beta-related	GO:0005179:hormone activity; Molecular Function;GO:0005576:extracellular region; Cellular Component;GO:0008083:growth factor activity; Molecular Function;GO:0009267:inhibin beta b chain precursor;GO:0032869:inhibin beta b chain precursor;GO:0032924:inhibin beta b chain precursor;GO:0040007:growth; Biological Process;GO:0042803:inhibin beta b chain precursor;GO:0045444:inhibin beta b chain precurs…
BKGENE16932	1		●	\	BKGENE16932	\	\	\	\	\	\	\	\	SYNJ2	545797541	INPP5E	38327539	Inpp5e	14916467	INPP5E	528969889	INPP5E; inositol polyphosphate-5-phosphatase, 72 kDa; K01099 phosphatidylinositol-bisphosphatase [EC:3.1.3.36]	72 kDa inositol polyphosphate 5-phosphatase OS=Mus musculus GN=Inpp5e PE=1 SV=1	E1BAU6_BOVIN Uncharacterized protein OS=Bos taurus GN=INPP5E PE=4 SV=1	IPR000300:Inositol polyphosphate-related phosphatase;IPR005135:Endonuclease/exonuclease/phosphatase	GO:0046856:phosphatidylinositol dephosphorylation; Biological Process;
LWGENE03741	3		●	LWGENE03741	\	\	\	\	\	\	PIGENE19977	\	TPGENE02105	LOC100521229	311273225	ALPI	157266292	Alppl2	755493726	ALPI	68299797	intestinal-type alkaline phosphatase-like; K01077 alkaline phosphatase [EC:3.1.3.1]	Alkaline phosphatase, placental-like OS=Mus musculus GN=Alppl2 PE=2 SV=2	I3LHU5_PIG Uncharacterized protein OS=Sus scrofa GN=LOC100737685 PE=3 SV=1	IPR001952:Alkaline phosphatase	GO:0008152:metabolic process; Biological Process;GO:0016791:phosphatase activity; Molecular Function;
RCGENE09713	10		●	LWGENE01407	BKGENE07810	BMGENE06927	HAGENE16926	JHGENE17669	LAGENE06834	MSGENE00168	PIGENE04369	RCGENE09713	TPGENE15232	\	\	ISYNA1	7705558	Isyna1	12963757	ISYNA1	114051253	ISYNA1; inositol-3-phosphate synthase 1; K01858 myo-inositol-1-phosphate synthase [EC:5.5.1.4]	Inositol-3-phosphate synthase 1 OS=Bos taurus GN=ISYNA1 PE=2 SV=1	E2RJW5_CANFA Uncharacterized protein OS=Canis familiaris GN=ISYNA1 PE=4 SV=2	IPR002587:Myo-inositol-1-phosphate synthase;IPR013021:Myo-inositol-1-phosphate synthase, GAPDH-like	GO:0000166:inositol-3-phosphate synthase 1 isoform 2;GO:0004512:inositol-3-phosphate synthase activity; Molecular Function;GO:0006021:inositol biosynthetic process; Biological Process;GO:0008654:phospholipid biosynthetic process; Biological Process;
LWGENE20375	10		●	LWGENE20375	BKGENE20516	BMGENE18878	HAGENE20592	JHGENE20548	LAGENE20347	MSGENE20557	PIGENE20530	RCGENE20531	TPGENE02034	LOC100739685	545814045	ITGAX	767988561	Itgax	10946646	ITGAD	156523104	ITGAD; integrin, alpha D; K06594 integrin alpha D	Integrin alpha-X OS=Homo sapiens GN=ITGAX PE=1 SV=3	K9IVW2_PIG Integrin alpha-X OS=Sus scrofa GN=ITGAX PE=2 SV=1	\	\
JHGENE02598	10		●	LWGENE12474	BKGENE15107	BMGENE08609	HAGENE05983	JHGENE02598	LAGENE15034	MSGENE14386	PIGENE11565	RCGENE02259	TPGENE19055	LPIN2	213983059	LPIN2	530425007	Lpin2	259089106	LPIN2	528924963	LPIN2; lipin 2 (EC:3.1.3.4); K15728 phosphatidate phosphatase LPIN [EC:3.1.3.4]	Phosphatidate phosphatase LPIN2 OS=Homo sapiens GN=LPIN2 PE=1 SV=1	B6VE05_PIG Lipin 2 OS=Sus scrofa GN=LPIN2 PE=2 SV=1	IPR007651:Lipin, N-terminal;IPR013209:LNS2, Lipin/Ned1/Smp2;IPR026058:LIPIN family;IPR026744:Phosphatidate phosphatase LPIN2	GO:0003713:transcription coactivator activity; Molecular Function;GO:0006629:lipid metabolic process; Biological Process;GO:0008195:phosphatidate phosphatase activity; Molecular Function;GO:0045944:positive regulation of transcription from RNA polymerase II promoter; Biological Process;
BMGENE01373	10		●	LWGENE13751	BKGENE04066	BMGENE01373	HAGENE15792	JHGENE00648	LAGENE07563	MSGENE09076	PIGENE03270	RCGENE19670	TPGENE04423	LPL	55741569	LPL	4557727	Lpl	126723006	LPL	115497164	LPL; lipoprotein lipase (EC:3.1.1.34); K01059 lipoprotein lipase [EC:3.1.1.34]	Lipoprotein lipase OS=Sus scrofa GN=LPL PE=2 SV=1	Q6J9X8_PIG Lipoprotein lipase OS=Sus scrofa GN=LPL PE=2 SV=1	IPR000734:Lipase;IPR001024:PLAT/LH2 domain;IPR002330:Lipoprotein lipase;IPR013818:Lipase, N-terminal	GO:0003824:catalytic activity; Molecular Function;GO:0004465:lipoprotein lipase activity; Molecular Function;GO:0005515:protein binding; Molecular Function;GO:0005886:lipoprotein lipase;GO:0006629:lipid metabolic process; Biological Process;GO:0008201:lipoprotein lipase;GO:0016042:lipoprotein lipase;GO:0031225:lipoprotein lipase;GO:0034361:lipoprotein lipase;GO:0042627:lipoprotein lipase;
BMGENE03854	10		●	LWGENE16696	BKGENE05285	BMGENE03854	HAGENE13417	JHGENE03219	LAGENE01106	MSGENE03660	PIGENE05663	RCGENE07918	TPGENE12669	MAFB	335304849	MAF	73427806	Maf	71480167	MAF	157785607	MAF; v-maf avian musculoaponeurotic fibrosarcoma oncogene homolog; K09035 transcription factor Maf	Transcription factor Maf OS=Danio rerio GN=maf PE=1 SV=1	G3RSX8_GORGO Uncharacterized protein OS=Gorilla gorilla gorilla GN=MAF PE=4 SV=1	IPR004826:Basic leucine zipper domain, Maf-type;IPR004827:Basic-leucine zipper domain;IPR013592:Maf transcription factor, N-terminal;IPR024874:Transcription factor Maf	GO:0003677:DNA binding; Molecular Function;GO:0003700:sequence-specific DNA binding transcription factor activity; Molecular Function;GO:0005634:nucleus; Cellular Component;GO:0006355:regulation of transcription, DNA-dependent; Biological Process;GO:0043565:sequence-specific DNA binding; Molecular Function;
BKGENE18792	6		●	LWGENE09799	BKGENE18792	BMGENE06042	HAGENE11611	JHGENE11033	\	MSGENE05997	\	\	\	MT-III	545829713	MT2A	5174764	\	\	MT1A	94966789	metallothionein-1E-like; K14739 metallothionein 1/2	Metallothionein-1E OS=Sus scrofa GN=MT1E PE=3 SV=1	G7NPT0_MACMU Metallothionein OS=Macaca mulatta GN=EGK_12807 PE=3 SV=1	IPR000006:Metallothionein, vertebrate;IPR003019:Metallothionein superfamily, eukaryotic	GO:0046872:metal ion binding; Molecular Function;
TPGENE20399	10		●	LWGENE03597	BKGENE06400	BMGENE03242	HAGENE01777	JHGENE20273	LAGENE12589	MSGENE07051	PIGENE08290	RCGENE18488	TPGENE20399	LOC102157873	545866052	NEGR1	767903638	Negr1	568922990	NEGR1	329664044	NEGR1; neuronal growth regulator 1; K06775 neuronal growth regulator 1	Neuronal growth regulator 1 OS=Homo sapiens GN=NEGR1 PE=1 SV=3	I3MGB9_SPETR Uncharacterized protein OS=Spermophilus tridecemlineatus GN=NEGR1 PE=4 SV=1	IPR003598:Immunoglobulin subtype 2;IPR003599:Immunoglobulin subtype;IPR007110:Immunoglobulin-like domain;IPR013098:Immunoglobulin I-set	GO:0005515:protein binding; Molecular Function;
LWGENE20663	10		●	LWGENE20663	BKGENE20824	BMGENE20909	HAGENE20836	JHGENE20794	LAGENE20730	MSGENE20853	PIGENE20836	RCGENE20635	TPGENE20424	\	\	NPB	22507403	Npb	23463265	NPB	27806833	NPB; neuropeptide B; K05267 preproneuropeptide B	Neuropeptide B OS=Bos taurus GN=NPB PE=1 SV=1	I3N803_SPETR Uncharacterized protein OS=Spermophilus tridecemlineatus GN=NPB PE=4 SV=1	IPR013297:Neuropeptide B/W precursor family;IPR013298:Neuropeptide B precursor	GO:0001664:G-protein coupled receptor binding; Molecular Function;GO:0005576:neuropeptide b precursor;GO:0007218:neuropeptide b precursor;
BKGENE02697	10		●	LWGENE07414	BKGENE02697	BMGENE05864	HAGENE01374	JHGENE10315	LAGENE17311	MSGENE16192	PIGENE01229	RCGENE15390	TPGENE01284	NPFFR2	545845346	NPFFR2	221316652	Npffr2	755512170	NPFFR2	528953488	NPFFR2; neuropeptide FF receptor 2; K08375 neuropeptide FF receptor 2	Neuropeptide FF receptor 2 OS=Homo sapiens GN=NPFFR2 PE=1 SV=2	F1RUN6_PIG Uncharacterized protein OS=Sus scrofa PE=4 SV=2	IPR000276:G protein-coupled receptor, rhodopsin-like;IPR005395:Neuropeptide FF receptor family;IPR005397:Neuropeptide FF receptor, type 2;IPR017452:GPCR, rhodopsin-like, 7TM	GO:0004930:G-protein coupled receptor activity; Molecular Function;GO:0007186:G-protein coupled receptor signaling pathway; Biological Process;GO:0008188:neuropeptide receptor activity; Molecular Function;GO:0016021:integral to membrane; Cellular Component;GO:0031628:opioid receptor binding; Molecular Function;GO:0043408:regulation of MAPK cascade; Biological Process;GO:0045761:regulation of aden…
TPGENE06167	10		●	LWGENE20600	BKGENE08284	BMGENE18710	HAGENE02109	JHGENE18548	LAGENE07367	MSGENE20745	PIGENE20639	RCGENE20319	TPGENE06167	MLNR	335296883	NTSR1	110611243	Ntsr1	9055296	NTSR1	528973825	NTSR1; neurotensin receptor 1 (high affinity); K04211 neurotensin receptor 1	Neurotensin receptor type 1 OS=Homo sapiens GN=NTSR1 PE=1 SV=2	L8IR24_BOSMU Neurotensin receptor type 1 (Fragment) OS=Bos grunniens mutus GN=M91_18938 PE=3 SV=1	IPR000276:G protein-coupled receptor, rhodopsin-like;IPR003984:Neurotensin receptor;IPR003985:Neurotensin type 1 receptor;IPR017452:GPCR, rhodopsin-like, 7TM	GO:0004930:G-protein coupled receptor activity; Molecular Function;GO:0007186:G-protein coupled receptor signaling pathway; Biological Process;GO:0016021:integral to membrane; Cellular Component;GO:0016492:G-protein coupled neurotensin receptor activity; Molecular Function;
LAGENE02702	10		●	LWGENE05253	BKGENE11856	BMGENE11439	HAGENE02243	JHGENE04214	LAGENE02702	MSGENE05599	PIGENE07416	RCGENE11324	TPGENE17310	PDE3A	47523360	PDE3A	347658969	Pde3a	568944252	PDE3A	741878070	PDE3A; phosphodiesterase 3A, cGMP-inhibited (EC:3.1.4.17); K13296 cGMP-inhibited 3',5'-cyclic phosphodiesterase [EC:3.1.4.17]	cGMP-inhibited 3',5'-cyclic phosphodiesterase A OS=Homo sapiens GN=PDE3A PE=1 SV=3	Q9XSW7_PIG Cyclic nucleotide phosphodiesterase PDE3A OS=Sus scrofa PE=2 SV=1	IPR002073:3'5'-cyclic nucleotide phosphodiesterase, catalytic domain;IPR003607:HD/PDEase domain	GO:0001556:cgmp-inhibited 3 -cyclic phosphodiesterase a;GO:0003824:catalytic activity; Molecular Function;GO:0004114:3',5'-cyclic-nucleotide phosphodiesterase activity; Molecular Function;GO:0004115:cgmp-inhibited 3 -cyclic phosphodiesterase a;GO:0006198:cgmp-inhibited 3 -cyclic phosphodiesterase a;GO:0007165:signal transduction; Biological Process;GO:0019933:cgmp-inhibited 3 -cyclic phosphodiest…
BMGENE02141	10		●	LWGENE02798	BKGENE09626	BMGENE02141	HAGENE02761	JHGENE06241	LAGENE07218	MSGENE03514	PIGENE16889	RCGENE15004	TPGENE19865	KCNQ5	350578236	KCNQ1	32479525	Kcnq1	755524072	KCNQ1	329664260	potassium voltage-gated channel subfamily KQT member 1-like; K04926 potassium voltage-gated channel KQT-like subfamily member 1	Potassium voltage-gated channel subfamily KQT member 1 OS=Rattus norvegicus GN=Kcnq1 PE=2 SV=1	G1L5M3_AILME Uncharacterized protein (Fragment) OS=Ailuropoda melanoleuca GN=KCNQ1 PE=4 SV=1	IPR003091:Voltage-dependent potassium channel;IPR003937:Potassium channel, voltage dependent, KCNQ;IPR005821:Ion transport domain;IPR005827:Potassium channel, voltage dependent, KCNQ1;IPR013821:Potassium channel, voltage dependent, KCNQ, C-terminal	GO:0005216:ion channel activity; Molecular Function;GO:0005249:voltage-gated potassium channel activity; Molecular Function;GO:0006811:ion transport; Biological Process;GO:0006813:potassium ion transport; Biological Process;GO:0008076:voltage-gated potassium channel complex; Cellular Component;GO:0016020:membrane; Cellular Component;GO:0055085:transmembrane transport; Biological Process;
MSGENE18381	10		●	LWGENE02114	BKGENE01513	BMGENE12881	HAGENE05696	JHGENE08480	LAGENE10614	MSGENE18381	PIGENE01212	RCGENE10567	TPGENE00583	RPGRIP1L	545829789	RPGRIP1L	767989654	Rpgrip1l	145976944	RPGRIP1L	528991042	RPGRIP1L; RPGRIP1-like; K16550 protein fantom	Protein fantom OS=Homo sapiens GN=RPGRIP1L PE=1 SV=2	E1BJB4_BOVIN Uncharacterized protein OS=Bos taurus GN=RPGRIP1L PE=4 SV=2	IPR000008:C2 calcium-dependent membrane targeting;IPR018029:C2 membrane targeting protein;IPR021656:Protein of unknown function DUF3250	GO:0001701:protein fantom isoform 2;GO:0001822:protein fantom isoform 2;GO:0001889:protein fantom isoform 2;GO:0005515:protein binding; Molecular Function;GO:0005737:protein fantom isoform 2;GO:0005813:protein fantom isoform 2;GO:0005911:protein fantom isoform 2;GO:0005932:protein fantom isoform 2;GO:0007368:protein fantom isoform 2;GO:0008589:protein fantom isoform 2;GO:0021532:protein fantom is…
RCGENE15267	8		●	LWGENE16108	BKGENE00536	\	\	JHGENE18290	LAGENE00829	MSGENE05286	PIGENE15350	RCGENE15267	TPGENE00724	LOC100049695	148747594	RPLP0	4506667	Rplp0	6671569	RPLP0	60592767	RPLP0; ribosomal phosphoprotein large PO subunit; K02941 large subunit ribosomal protein LP0	60S acidic ribosomal protein P0 OS=Sus scrofa GN=RPLP0 PE=2 SV=2	I7GJL8_MACFA Macaca fascicularis brain cDNA clone: QbsB-10454, similar to human ribosomal protein, large, P0 (RPLP0), transcriptvariant 1, mRNA, RefSeq: NM_001002.2 OS=Macaca fascicularis PE=2 SV=1	IPR001790:Ribosomal protein L10/acidic P0;IPR001813:Ribosomal protein L10/L12	GO:0003735:structural constituent of ribosome; Molecular Function;GO:0005622:intracellular; Cellular Component;GO:0005634:60s acidic ribosomal protein p0;GO:0005840:ribosome; Cellular Component;GO:0006414:translational elongation; Biological Process;GO:0042254:ribosome biogenesis; Biological Process;
TPGENE04314	10		●	LWGENE19245	BKGENE13249	BMGENE16098	HAGENE12828	JHGENE09786	LAGENE14178	MSGENE14200	PIGENE13128	RCGENE13119	TPGENE04314	SOX9	47523170	SOX8	30179903	Sox8	33563276	SOX8	529006135	SOX8; SRY (sex determining region Y)-box 8; K09270 transcription factor SOX7/8/10/18 (SOX group E/F)	Transcription factor SOX-8 OS=Mus musculus GN=Sox8 PE=2 SV=2	G1PTM0_MYOLU Uncharacterized protein OS=Myotis lucifugus PE=4 SV=1	IPR009071:High mobility group box domain;IPR022151:Sox developmental protein N-terminal	\
HAGENE00381	10		●	LWGENE06703	BKGENE12876	BMGENE08706	HAGENE00381	JHGENE12488	LAGENE01278	MSGENE03342	PIGENE02124	RCGENE08911	TPGENE09084	SREBF1	47523404	SREBF1	22547195	Srebf1	27753981	SREBF1	164519008	SREBF1, ADD1, SCREBP1, SREBP-1C, SREBP1; sterol regulatory element binding transcription factor 1; K07197 sterol regulatory element-binding transcription factor 1	Sterol regulatory element-binding protein 1 OS=Sus scrofa GN=SREBF1 PE=2 SV=2	M3XLS4_MUSPF Uncharacterized protein OS=Mustela putorius furo GN=Srebf1 PE=4 SV=1	IPR011598:Myc-type, basic helix-loop-helix (bHLH) domain	GO:0000139:sterol regulatory element-binding protein 1;GO:0003677:sterol regulatory element-binding protein 1;GO:0005634:sterol regulatory element-binding protein 1;GO:0005789:sterol regulatory element-binding protein 1;GO:0006355:sterol regulatory element-binding protein 1;GO:0008203:sterol regulatory element-binding protein 1;GO:0010867:sterol regulatory element-binding protein 1;GO:0012507:ste…
BKGENE08096	10		●	LWGENE01477	BKGENE08096	BMGENE09683	HAGENE05468	JHGENE07589	LAGENE09170	MSGENE07608	PIGENE04106	RCGENE14727	TPGENE19191	\	\	ST3GAL6	767925505	St3gal6	755553836	ST3GAL6	741913209	ST3GAL6; ST3 beta-galactoside alpha-2,3-sialyltransferase 6; K03792 beta-galactoside alpha-2,3-sialyltransferase (sialyltransferase 10) [EC:2.4.99.10]	Type 2 lactosamine alpha-2,3-sialyltransferase OS=Pan troglodytes GN=ST3GAL6 PE=2 SV=1	G9KRD1_MUSPF ST3 beta-galactoside alpha-2,3-sialyltransferase 6 (Fragment) OS=Mustela putorius furo PE=2 SV=1	\	GO:0006464:st3 beta-galactoside alpha- -sialyltransferase 6;GO:0006664:st3 beta-galactoside alpha- -sialyltransferase 6;GO:0009311:st3 beta-galactoside alpha- -sialyltransferase 6;GO:0052798:st3 beta-galactoside alpha- -sialyltransferase 6;GO:0071354:st3 beta-galactoside alpha- -sialyltransferase 6;
BKGENE03693	10		●	LWGENE00415	BKGENE03693	BMGENE02239	HAGENE01809	JHGENE06050	LAGENE02372	MSGENE10959	PIGENE20041	RCGENE02761	TPGENE17232	SULT1E1	47522810	SULT1E1	767932541	Sult1e1	256985138	SULT1E1	722829063	SULT1E1, STE; sulfotransferase family 1E, estrogen-preferring, member 1 (EC:2.8.2.4); K01016 estrone sulfotransferase [EC:2.8.2.4]	Estrogen sulfotransferase OS=Bos taurus GN=SULT1E1 PE=1 SV=1	Q95MF8_PIG Estrogen sulfotransferase OS=Sus scrofa PE=2 SV=1	IPR000863:Sulfotransferase domain	GO:0008146:sulfotransferase activity; Molecular Function;
RCGENE13434	10		●	LWGENE20108	BKGENE05888	BMGENE05421	HAGENE00931	JHGENE20352	LAGENE04244	MSGENE20308	PIGENE06890	RCGENE13434	TPGENE13484	TAS1R2	392583960	TAS1R2	112789566	Tas1r2	13994203	TAS1R2	330688400	TAS1R2; taste receptor, type 1, member 2; K04625 taste receptor type 1 member 2	Taste receptor type 1 member 2 OS=Canis familiaris GN=TAS1R2 PE=2 SV=1	I1ZBR6_PIG Taste receptor type 1 member 2 OS=Sus scrofa GN=TAS1R2 PE=2 SV=1	IPR000337:GPCR, family 3;IPR001828:Extracellular ligand-binding receptor;IPR011500:GPCR, family 3, nine cysteines domain;IPR017978:GPCR, family 3, C-terminal	GO:0004930:G-protein coupled receptor activity; Molecular Function;GO:0007186:G-protein coupled receptor signaling pathway; Biological Process;GO:0016021:integral to membrane; Cellular Component;
RCGENE15008	9		●	LWGENE02794	BKGENE09622	BMGENE02137	HAGENE02765	JHGENE06237	LAGENE07214	MSGENE03510	PIGENE16885	RCGENE15008	\	TPH2	545826595	TH	88900501	Th	6678337	TH	27806937	TH; tyrosine hydroxylase (EC:1.14.16.2); K00501 tyrosine 3-monooxygenase [EC:1.14.16.2]	Tyrosine 3-monooxygenase OS=Canis familiaris GN=TH PE=2 SV=1	M3W6S8_FELCA Uncharacterized protein OS=Felis catus GN=TH PE=4 SV=1	IPR001273:Aromatic amino acid hydroxylase;IPR019774:Aromatic amino acid hydroxylase, C-terminal;IPR021164:Tyrosine hydroxylase, conserved site	GO:0004497:monooxygenase activity; Molecular Function;GO:0004511:tyrosine 3-monooxygenase activity; Molecular Function;GO:0005506:iron ion binding; Molecular Function;GO:0009072:aromatic amino acid family metabolic process; Biological Process;GO:0016714:oxidoreductase activity, acting on paired donors, with incorporation or reduction of molecular oxygen, reduced pteridine as one donor, and incorp…
MSGENE02729	10		●	LWGENE18827	BKGENE10539	BMGENE07646	HAGENE11014	JHGENE06731	LAGENE10088	MSGENE02729	PIGENE11195	RCGENE18880	TPGENE15502	PTGER3	545835658	TBXA2R	768003630	Tbxa2r	6678233	TBXA2R	528955671	thromboxane A2 receptor-like; K04264 thromboxane A2 receptor	Thromboxane A2 receptor OS=Bos taurus GN=TBXA2R PE=2 SV=2	G1LGK2_AILME Uncharacterized protein OS=Ailuropoda melanoleuca GN=TBXA2R PE=3 SV=1	IPR000276:G protein-coupled receptor, rhodopsin-like;IPR001105:Thromboxane receptor;IPR008365:Prostanoid receptor;IPR017452:GPCR, rhodopsin-like, 7TM	GO:0004930:G-protein coupled receptor activity; Molecular Function;GO:0004960:thromboxane receptor activity; Molecular Function;GO:0006954:thromboxane a2 receptor-like;GO:0007186:G-protein coupled receptor signaling pathway; Biological Process;GO:0016021:integral to membrane; Cellular Component;GO:0019229:thromboxane a2 receptor-like;GO:0019932:thromboxane a2 receptor-like;GO:0032496:thromboxane …
HAGENE09148	10		●	LWGENE16564	BKGENE13769	BMGENE15111	HAGENE09148	JHGENE01057	LAGENE07593	MSGENE05791	PIGENE07178	RCGENE07356	TPGENE07709	DCK	311262318	TK2	290656975	Tk2	568957290	TK2	741958806	TK2; thymidine kinase 2, mitochondrial; K00857 thymidine kinase [EC:2.7.1.21]	Thymidine kinase 2, mitochondrial OS=Macaca fascicularis GN=TK2 PE=2 SV=1	L8IH68_BOSMU Thymidine kinase 2, mitochondrial (Fragment) OS=Bos grunniens mutus GN=M91_18308 PE=4 SV=1	IPR002624:Deoxynucleoside kinase	GO:0005524:ATP binding; Molecular Function;GO:0006139:nucleobase-containing compound metabolic process; Biological Process;GO:0016773:phosphotransferase activity, alcohol group as acceptor; Molecular Function;
LWGENE04090	9		●	LWGENE04090	BKGENE12537	BMGENE14143	HAGENE11870	JHGENE13169	LAGENE03616	MSGENE14117	PIGENE12339	\	TPGENE10972	TM7SF2	311247345	LBR	767912421	Lbr	568911330	LBR	528979542	TM7SF2; transmembrane 7 superfamily member 2; K00222 delta14-sterol reductase [EC:1.3.1.70]	Lamin-B receptor OS=Homo sapiens GN=LBR PE=1 SV=2	M3VH35_PIG Lamin B receptor OS=Sus scrofa GN=LBR PE=2 SV=1	IPR001171:Ergosterol biosynthesis ERG4/ERG24;IPR002999:Tudor domain;IPR019023:Lamin-B receptor of TUDOR domain	GO:0016020:membrane; Cellular Component;
BMGENE18613	10		●	LWGENE17101	BKGENE01008	BMGENE18613	HAGENE06821	JHGENE02372	LAGENE09293	MSGENE08561	PIGENE09867	RCGENE06478	TPGENE13135	TMED9	311249585	TMED9	39725636	Tmed11	71037401	TMED9	77736600	transmembrane emp24 domain-containing protein 7 precursor, putative; K14825 protein ERP2	Transmembrane emp24 domain-containing protein 11 OS=Canis familiaris GN=TMED11 PE=1 SV=1	E1BE23_BOVIN Uncharacterized protein OS=Bos taurus PE=3 SV=1	IPR009038:GOLD;IPR015719:Glycoprotein 25L-related	GO:0006810:transport; Biological Process;GO:0016021:integral to membrane; Cellular Component;
LAGENE02541	10		●	LWGENE00153	BKGENE18656	BMGENE11623	HAGENE19768	JHGENE15838	LAGENE02541	MSGENE05514	PIGENE05123	RCGENE03334	TPGENE08094	LOC100519519	545874869	TTN	378925625	Ttn	568916277	TTN	741916099	TTN; titin; K12567 titin [EC:2.7.11.1]	Titin OS=Homo sapiens GN=TTN PE=1 SV=4	F1N757_BOVIN Uncharacterized protein OS=Bos taurus PE=4 SV=2	IPR003598:Immunoglobulin subtype 2;IPR003599:Immunoglobulin subtype;IPR003961:Fibronectin, type III;IPR007110:Immunoglobulin-like domain;IPR013098:Immunoglobulin I-set	GO:0005515:protein binding; Molecular Function;
TPGENE07135	10		●	LWGENE20580	BKGENE20493	BMGENE20660	HAGENE20627	JHGENE20373	LAGENE20405	MSGENE20702	PIGENE20528	RCGENE20330	TPGENE07135	SSTR1	298160976	UTS2R	9506745	Uts2r	21703878	UTS2R	741964383	UTS2R; urotensin 2 receptor; K04241 urotensin 2 receptor	Urotensin-2 receptor OS=Bos taurus GN=UTS2R PE=2 SV=2	F6RZK4_HORSE Uncharacterized protein OS=Equus caballus GN=UTS2R PE=3 SV=1	IPR000276:G protein-coupled receptor, rhodopsin-like;IPR000670:Urotensin II receptor;IPR017452:GPCR, rhodopsin-like, 7TM	GO:0001604:urotensin II receptor activity; Molecular Function;GO:0004930:G-protein coupled receptor activity; Molecular Function;GO:0007186:G-protein coupled receptor signaling pathway; Biological Process;GO:0008217:regulation of blood pressure; Biological Process;GO:0016021:integral to membrane; Cellular Component;GO:0042312:regulation of vasodilation; Biological Process;
JHGENE04513	1		●	\	\	\	\	JHGENE04513	\	\	\	\	\	\	\	ZMPSTE24	767901867	Zmpste24	27370012	ZMPSTE24	300793653	ZMPSTE24; zinc metallopeptidase STE24; K06013 STE24 endopeptidase [EC:3.4.24.84]	CAAX prenyl protease 1 homolog OS=Homo sapiens GN=ZMPSTE24 PE=1 SV=2	E1BMF2_BOVIN Uncharacterized protein OS=Bos taurus GN=ZMPSTE24 PE=4 SV=2	IPR001915:Peptidase M48;IPR027057:CAAX prenyl protease 1	GO:0004222:metalloendopeptidase activity; Molecular Function;GO:0006508:proteolysis; Biological Process;GO:0008233:peptidase activity; Molecular Function;GO:0016020:membrane; Cellular Component;GO:0071586:CAAX-box protein processing; Biological Process;
BKGENE02294	1			\	BKGENE02294	\	\	\	\	\	\	\	\	DEPDC1B	545877648	DEPDC1	38488716	Depdc1a	285401940	DEPDC1	194665711	\	DEP domain-containing protein 1A OS=Homo sapiens GN=DEPDC1 PE=1 SV=2	E1BA57_BOVIN Uncharacterized protein OS=Bos taurus GN=DEPDC1 PE=4 SV=2	IPR000198:Rho GTPase-activating protein domain;IPR000591:DEP domain	GO:0007165:signal transduction; Biological Process;GO:0035556:intracellular signal transduction; Biological Process;
BKGENE03242	1			\	BKGENE03242	\	\	\	\	\	\	\	\	\	\	C14orf180	56605684	A530016L24Rik	568979878	C21H14orf180	329665052	\	Transmembrane protein C14orf180 homolog OS=Bos taurus PE=2 SV=2	G5E5T8_BOVIN Uncharacterized protein OS=Bos taurus GN=C21H14orf180 PE=4 SV=1	IPR028114:Protein of unknown function DUF4658	GO:0016021:transmembrane protein c14orf180 homolog;
BKGENE07947	10			LWGENE17996	BKGENE07947	BMGENE03942	HAGENE06418	JHGENE02441	LAGENE18172	MSGENE14645	PIGENE12537	RCGENE15650	TPGENE13195	\	\	C17orf50	116268107	1700020L24Rik	158937252	C19H17orf50	297486474	\	Uncharacterized protein C17orf50 OS=Homo sapiens GN=C17orf50 PE=2 SV=2	M3X2X2_FELCA Uncharacterized protein OS=Felis catus GN=C17orf50 PE=4 SV=1	\	\
BKGENE08267	10			LWGENE17505	BKGENE08267	BMGENE18730	HAGENE02126	JHGENE18564	LAGENE07351	MSGENE15495	PIGENE13214	RCGENE08274	TPGENE06151	\	\	GMEB2	6912568	Gmeb2	568920199	GMEB2	528973591	\	Glucocorticoid modulatory element-binding protein 2 OS=Homo sapiens GN=GMEB2 PE=1 SV=1	L8HLK4_BOSMU Glucocorticoid modulatory element-binding protein 2 OS=Bos grunniens mutus GN=M91_04659 PE=4 SV=1	IPR000770:SAND domain;IPR024830:Glucocorticoid modulatory element-binding protein 1/2	GO:0003677:DNA binding; Molecular Function;GO:0003713:transcription coactivator activity; Molecular Function;GO:0005634:nucleus; Cellular Component;
BKGENE08269	1			\	BKGENE08269	\	\	\	\	\	\	\	\	LOC100513894	545881744	PPDPF	13236524	Ppdpf	568920403	PPDPF	741947884	\	Pancreatic progenitor cell differentiation and proliferation factor OS=Bos taurus GN=PPDPF PE=3 SV=1	M3VH95_PIG Pancreatic progenitor cell differentiation and proliferation factor homolog OS=Sus scrofa GN=PPDPF PE=4 SV=1	IPR026754:Pancreatic progenitor cell differentiation and proliferation factor	GO:0007275:multicellular organismal development; Biological Process;GO:0030154:cell differentiation; Biological Process;
BKGENE10538	10			LWGENE18828	BKGENE10538	BMGENE07647	HAGENE11013	JHGENE06732	LAGENE10087	MSGENE02730	PIGENE11194	RCGENE18881	TPGENE15501	GIPC2	350586098	GIPC3	530425109	Gipc3	568967139	GIPC3	329664952	\	PDZ domain-containing protein GIPC3 OS=Mus musculus GN=Gipc3 PE=1 SV=1	I3M9B1_SPETR Uncharacterized protein (Fragment) OS=Spermophilus tridecemlineatus GN=GIPC3 PE=4 SV=1	IPR001478:PDZ domain	GO:0005515:protein binding; Molecular Function;
BKGENE10613	10			LWGENE03092	BKGENE10613	BMGENE01156	HAGENE16828	JHGENE19693	LAGENE00496	MSGENE04770	PIGENE06714	RCGENE17796	TPGENE00128	LOC102161224	545828218	CFAP54	767893592	Cfap54	755535734	CFAP54	741926980	\	Putative uncharacterized protein C12orf63 OS=Homo sapiens GN=C12orf63 PE=2 SV=2	H2Q6N6_PANTR Uncharacterized protein OS=Pan troglodytes GN=LOC452148 PE=4 SV=1	IPR027912:Protein of unknown function DUF4486	\
BKGENE10924	10			LWGENE11293	BKGENE10924	BMGENE04212	HAGENE19588	JHGENE10978	LAGENE13914	MSGENE12141	PIGENE09673	RCGENE15086	TPGENE17692	\	\	FRMD3	350276220	2310002L09Rik	239937495	FRMD3	114052346	\	FERM domain-containing protein 3 OS=Homo sapiens GN=FRMD3 PE=2 SV=1	I3N8G9_SPETR Uncharacterized protein OS=Spermophilus tridecemlineatus PE=4 SV=1	\	GO:0005737:ferm domain-containing protein 3 isoform 5;GO:0005856:ferm domain-containing protein 3 isoform 5;GO:0008092:ferm domain-containing protein 3 isoform 5;GO:0016021:ferm domain-containing protein 3 isoform 5;GO:0019898:ferm domain-containing protein 3 isoform 5;
BKGENE12889	10			LWGENE06691	BKGENE12889	BMGENE08694	HAGENE00394	JHGENE06564	LAGENE10822	MSGENE03329	PIGENE02112	RCGENE08899	TPGENE18075	\	\	TMEM11	4505901	Tmem11	27734998	TMEM11	148232393	\	Transmembrane protein 11, mitochondrial OS=Homo sapiens GN=TMEM11 PE=1 SV=1	M3WLF6_FELCA Uncharacterized protein OS=Felis catus GN=TMEM11 PE=4 SV=1	IPR026120:Transmembrane protein 11	GO:0007005:mitochondrion organization; Biological Process;GO:0031305:integral to mitochondrial inner membrane; Cellular Component;
BKGENE12996	10			LWGENE07038	BKGENE12996	BMGENE02748	HAGENE05863	JHGENE13606	LAGENE01313	MSGENE12930	PIGENE12798	RCGENE20314	TPGENE02285	LOC102167380	545894864	C21orf58	578836584	2610028H24Rik	568968915	C1H21orf58	741915623	\	Uncharacterized protein C21orf58 OS=Homo sapiens GN=C21orf58 PE=2 SV=2	F7E3S9_HORSE Uncharacterized protein OS=Equus caballus GN=C21orf58 PE=4 SV=1	IPR027904:Domain of unknown function DUF4587	\
BKGENE13767	9			LWGENE20577	BKGENE13767	BMGENE15109	HAGENE20558	JHGENE20345	\	MSGENE20526	PIGENE20509	RCGENE20295	TPGENE07711	\	\	BEAN1	767989436	Bean1	755527140	BEAN1	741958819	\	Protein BEAN1 OS=Homo sapiens GN=BEAN1 PE=2 SV=2	J9P8T0_CANFA Uncharacterized protein OS=Canis familiaris GN=BEAN1 PE=4 SV=1	\	\
BKGENE13773	10			LWGENE16559	BKGENE13773	BMGENE15116	HAGENE09144	JHGENE01053	LAGENE07598	MSGENE05796	PIGENE07173	RCGENE07361	TPGENE07704	\	\	CCDC79	767989767	Ccdc79	755526881	CCDC79	528991162	\	Coiled-coil domain-containing protein 79 OS=Homo sapiens GN=CCDC79 PE=2 SV=3	F6RBR8_HORSE Uncharacterized protein OS=Equus caballus GN=CCDC79 PE=4 SV=1	\	\
BKGENE14736	1			\	BKGENE14736	\	\	\	\	\	\	\	\	CALHM1	545893733	CALHM3	193211395	Calhm1	124486909	LOC786442	358411860	\	Calcium homeostasis modulator protein 3 OS=Homo sapiens GN=CALHM3 PE=2 SV=1	L5K2L2_PTEAL Calcium homeostasis modulator protein 3 OS=Pteropus alecto GN=PAL_GLEAN10014229 PE=4 SV=1	\	\
BKGENE15959	1			\	BKGENE15959	\	\	\	\	\	\	\	\	\	\	C1orf146	767904302	1700028K03Rik	33286440	C3H1orf146	84000029	\	Uncharacterized protein C1orf146 homolog OS=Bos taurus PE=2 SV=1	L8IKQ1_BOSMU Uncharacterized protein OS=Bos grunniens mutus GN=M91_06367 PE=4 SV=1	IPR027857:Protein of unknown function DUF4580	\
BKGENE16038	6			LWGENE13480	BKGENE16038	\	HAGENE13743	\	LAGENE15289	MSGENE07507	PIGENE09707	\	\	\	\	METTL7A	89145417	Mettl7a1	755552127	LOC781439	741926079	\	Methyltransferase-like protein 7A OS=Homo sapiens GN=METTL7A PE=1 SV=1	G3SF82_GORGO Uncharacterized protein OS=Gorilla gorilla gorilla PE=4 SV=1	IPR013216:Methyltransferase type 11	GO:0008152:metabolic process; Biological Process;GO:0008168:methyltransferase activity; Molecular Function;
BKGENE16228	1			\	BKGENE16228	\	\	\	\	\	\	\	\	\	\	CBFB	13124873	Cbfb	238814337	CBFB	300794490	\	Core-binding factor subunit beta OS=Homo sapiens GN=CBFB PE=1 SV=2	F7BRE0_CALJA Uncharacterized protein OS=Callithrix jacchus GN=LOC100411499 PE=4 SV=1	IPR003417:Core binding factor, beta subunit	GO:0003713:transcription coactivator activity; Molecular Function;GO:0005634:nucleus; Cellular Component;
BKGENE16412	1			\	BKGENE16412	\	\	\	\	\	\	\	\	\	\	CCDC134	530420388	Ccdc134	116268089	CCDC134	329663339	\	Coiled-coil domain-containing protein 134 OS=Rattus norvegicus GN=Ccdc134 PE=2 SV=1	M3WKF7_FELCA Uncharacterized protein OS=Felis catus GN=CCDC134 PE=4 SV=1	IPR026321:Coiled-coil domain-containing protein 134	\
BKGENE17560	1			\	BKGENE17560	\	\	\	\	\	\	\	\	\	\	ANKLE2	530401901	Ankle2	40789239	ANKLE2	528988401	\	Ankyrin repeat and LEM domain-containing protein 2 OS=Homo sapiens GN=ANKLE2 PE=1 SV=4	G1RPB6_NOMLE Uncharacterized protein (Fragment) OS=Nomascus leucogenys GN=LOC100582701 PE=4 SV=1	\	GO:0005635:ankyrin repeat and lem domain-containing protein 2;GO:0005737:ankyrin repeat and lem domain-containing protein 2;
BKGENE18784	10			LWGENE09792	BKGENE18784	BMGENE06035	HAGENE11618	JHGENE11040	LAGENE00403	MSGENE06886	PIGENE10260	RCGENE05236	TPGENE14945	\	\	FAM192A	530424338	Fam192a	755526228	FAM192A	741958382	\	Protein FAM192A OS=Homo sapiens GN=FAM192A PE=1 SV=1	M3VZE9_FELCA Uncharacterized protein OS=Felis catus GN=FAM192A PE=4 SV=1	IPR019331:NEFA-interacting nuclear protein NIP30, N-terminal	\
BKGENE19597	10			LWGENE08888	BKGENE19597	BMGENE05277	HAGENE04748	JHGENE13181	LAGENE03547	MSGENE13401	PIGENE02404	RCGENE08618	TPGENE10569	ISG12(A)	312062791	IFI6	13259552	Ifi27	268370047	IFI6	528940895	\	Interferon alpha-inducible protein 6 OS=Bos taurus GN=IFI6 PE=2 SV=1	Q6IED5_PIG Interferon, alpha-inducible protein 6 OS=Sus scrofa GN=6-16 PE=2 SV=1	IPR009311:Interferon-induced 6-16	GO:0016021:integral to membrane; Cellular Component;
BKGENE20407	1			\	BKGENE20407	\	\	\	\	\	\	\	\	LOC100517674	311267290	KRTAP3-2	13994364	Krtap3-3	21536226	KRTAP3-3	116004425	\	Keratin-associated protein 3-2 OS=Mus musculus GN=Krtap3-2 PE=2 SV=2	G3IGG7_CRIGR Keratin-associated protein 3-2 OS=Cricetulus griseus GN=I79_022880 PE=4 SV=1	IPR007659:Keratin, high-sulphur matrix protein	GO:0005198:structural molecule activity; Molecular Function;GO:0045095:keratin filament; Cellular Component;
BMGENE00881	10			LWGENE15958	BKGENE01902	BMGENE00881	HAGENE19199	JHGENE09412	LAGENE11044	MSGENE11105	PIGENE20576	RCGENE09527	TPGENE14291	\	\	SMCO1	117938326	Smco1	281427239	SMCO1	254553330	\	Uncharacterized protein C3orf43 OS=Homo sapiens GN=C3orf43 PE=2 SV=2	F7BVX1_HORSE Uncharacterized protein OS=Equus caballus GN=C3orf43 PE=4 SV=1	IPR027875:Protein of unknown function DUF4547	\
BMGENE01104	1			\	\	BMGENE01104	\	\	\	\	\	\	\	\	\	FRMD3	350276220	2310002L09Rik	239937495	FRMD3	114052346	\	FERM domain-containing protein 3 OS=Homo sapiens GN=FRMD3 PE=2 SV=1	I3N8G9_SPETR Uncharacterized protein OS=Spermophilus tridecemlineatus PE=4 SV=1	\	GO:0005737:ferm domain-containing protein 3 isoform 5;GO:0005856:ferm domain-containing protein 3 isoform 5;GO:0008092:ferm domain-containing protein 3 isoform 5;GO:0016021:ferm domain-containing protein 3 isoform 5;GO:0019898:ferm domain-containing protein 3 isoform 5;
BMGENE03210	1			\	\	BMGENE03210	\	\	\	\	\	\	\	OSGIN2	194037082	OSGIN1	33695101	Osgin1	568957595	OSGIN1	116004479	\	Oxidative stress-induced growth inhibitor 1 OS=Homo sapiens GN=OSGIN1 PE=2 SV=3	F1PE40_CANFA Uncharacterized protein (Fragment) OS=Canis familiaris GN=OSGIN1 PE=4 SV=2	\	\
BMGENE06994	10			LWGENE13378	BKGENE06131	BMGENE06994	HAGENE04494	JHGENE19320	LAGENE08991	MSGENE02537	PIGENE17945	RCGENE02849	TPGENE18900	NIPAL1	335307736	NIPA1	41406091	Nipa1	23956372	NIPA1	528938554	\	Magnesium transporter NIPA1 OS=Homo sapiens GN=NIPA1 PE=1 SV=1	L8IYS4_BOSMU Magnesium transporter NIPA1 (Fragment) OS=Bos grunniens mutus GN=M91_07925 PE=4 SV=1	IPR008521:Magnesium transporter NIPA	GO:0005769:tpa: non-imprinted in prader-willi angelman syndrome 1-like;GO:0005886:tpa: non-imprinted in prader-willi angelman syndrome 1-like;GO:0015095:magnesium ion transmembrane transporter activity; Molecular Function;GO:0015693:magnesium ion transport; Biological Process;GO:0016020:membrane; Cellular Component;
BMGENE07001	1			\	\	BMGENE07001	\	\	\	\	\	\	\	\	\	C1orf146	767904302	1700028K03Rik	33286440	C3H1orf146	84000029	\	Uncharacterized protein C1orf146 homolog OS=Bos taurus PE=2 SV=1	L8IKQ1_BOSMU Uncharacterized protein OS=Bos grunniens mutus GN=M91_06367 PE=4 SV=1	IPR027857:Protein of unknown function DUF4580	\
BMGENE08591	1			\	\	BMGENE08591	\	\	\	\	\	\	\	MBD6	545891934	MBD5	767918854	Mbd5	755497078	MBD5	528939259	\	Methyl-CpG-binding domain protein 5 OS=Homo sapiens GN=MBD5 PE=1 SV=3	I3N1A7_SPETR Uncharacterized protein OS=Spermophilus tridecemlineatus GN=MBD5 PE=4 SV=1	IPR001739:Methyl-CpG DNA binding	GO:0003677:DNA binding; Molecular Function;GO:0003682:methyl- binding domain protein isoform cra_a;GO:0005634:nucleus; Cellular Component;GO:0005694:methyl- binding domain protein isoform cra_a;
BMGENE12981	10			LWGENE07006	BKGENE13028	BMGENE12981	HAGENE05895	JHGENE01036	LAGENE01345	MSGENE01949	PIGENE12831	RCGENE08018	TPGENE16256	\	\	TRAPPC10	48928029	Trappc10	124486684	TRAPPC10	329663722	\	Trafficking protein particle complex subunit 10 OS=Homo sapiens GN=TRAPPC10 PE=1 SV=2	M3V800_PIG Trafficking protein particle complex 10 OS=Sus scrofa GN=TRAPPC10 PE=2 SV=1	IPR022233:TRAPP II complex, TRAPPC10	\
BMGENE13985	1			\	\	BMGENE13985	\	\	\	\	\	\	\	\	\	VWA3B	578803903	Vwa3b	568907230	VWA3B	741942211	\	von Willebrand factor A domain-containing protein 3B OS=Homo sapiens GN=VWA3B PE=2 SV=3	L5KTP1_PTEAL von Willebrand factor A domain-containing protein 3B OS=Pteropus alecto GN=PAL_GLEAN10005571 PE=4 SV=1	\	\
BMGENE14394	10			LWGENE19876	BKGENE10447	BMGENE14394	HAGENE16105	JHGENE14013	LAGENE06473	MSGENE15113	PIGENE07428	RCGENE13759	TPGENE08811	\	\	CCER2	768010559	Gm6537	304307759	CCER2	304307761	\	\	G3N0X1_BOVIN Uncharacterized protein OS=Bos taurus GN=LOC614600 PE=4 SV=1	\	\
BMGENE16491	1			\	\	BMGENE16491	\	\	\	\	\	\	\	CALHM1	545893733	CALHM3	193211395	Calhm1	124486909	LOC786442	358411860	\	Calcium homeostasis modulator protein 3 OS=Homo sapiens GN=CALHM3 PE=2 SV=1	L5K2L2_PTEAL Calcium homeostasis modulator protein 3 OS=Pteropus alecto GN=PAL_GLEAN10014229 PE=4 SV=1	\	\
BMGENE16605	1			\	\	BMGENE16605	\	\	\	\	\	\	\	DEPDC1B	545877648	DEPDC1	38488716	Depdc1a	285401940	DEPDC1	194665711	\	DEP domain-containing protein 1A OS=Homo sapiens GN=DEPDC1 PE=1 SV=2	E1BA57_BOVIN Uncharacterized protein OS=Bos taurus GN=DEPDC1 PE=4 SV=2	IPR000198:Rho GTPase-activating protein domain;IPR000591:DEP domain	GO:0007165:signal transduction; Biological Process;GO:0035556:intracellular signal transduction; Biological Process;
BMGENE16676	10			LWGENE16009	BKGENE14545	BMGENE16676	HAGENE14438	JHGENE08054	LAGENE07045	MSGENE09985	PIGENE13937	RCGENE18074	TPGENE17170	DMRTA1	311245699	DMRT3	11056048	Dmrt3	569007207	DMRT3	741935569	\	Doublesex- and mab-3-related transcription factor 3 OS=Homo sapiens GN=DMRT3 PE=1 SV=1	H0V6L1_CAVPO Uncharacterized protein OS=Cavia porcellus GN=Dmrt3 PE=4 SV=1	IPR001275:DM DNA-binding domain;IPR005173:DMRTA motif;IPR026607:DMRT/protein doublesex/protein male abnormal 3	GO:0003700:sequence-specific DNA binding transcription factor activity; Molecular Function;GO:0005634:nucleus; Cellular Component;GO:0006355:regulation of transcription, DNA-dependent; Biological Process;GO:0007548:doublesex- and mab-3-related transcription factor 3;GO:0043565:sequence-specific DNA binding; Molecular Function;
BMGENE16940	10			LWGENE12197	BKGENE08788	BMGENE16940	HAGENE03644	JHGENE12264	LAGENE03407	MSGENE11395	PIGENE10215	RCGENE07582	TPGENE13321	\	\	C1orf122	206725424	1110065P20Rik	568929700	C3H1orf122	528945293	\	Uncharacterized protein C1orf122 homolog OS=Mus musculus PE=4 SV=1	I3NAV3_SPETR Uncharacterized protein OS=Spermophilus tridecemlineatus GN=C1orf122 PE=4 SV=1	\	\
BMGENE18053	1			\	\	BMGENE18053	\	\	\	\	\	\	\	\	\	KIAA0825	767935741	2210408I21Rik	755545616	KIAA0825	741934622	\	Uncharacterized protein KIAA0825 OS=Homo sapiens GN=KIAA0825 PE=2 SV=2	M3WWK4_FELCA Uncharacterized protein OS=Felis catus GN=KIAA0825 PE=4 SV=1	IPR027993:Protein of unknown function DUF4495	\
BMGENE18618	9			LWGENE17106	BKGENE01012	BMGENE18618	HAGENE06816	JHGENE02377	LAGENE09288	MSGENE08566	PIGENE09872	RCGENE06483	\	FAM53B	545872639	FAM53A	767928972	Fam53a	755511763	FAM53A	741930852	\	Protein FAM53A OS=Homo sapiens GN=FAM53A PE=2 SV=1	G3HK82_CRIGR Protein FAM53A OS=Cricetulus griseus GN=I79_011100 PE=4 SV=1	\	\
BMGENE18727	1			\	\	BMGENE18727	\	\	\	\	\	\	\	LOC100513894	545881744	PPDPF	13236524	Ppdpf	568920403	PPDPF	741947884	\	Pancreatic progenitor cell differentiation and proliferation factor OS=Bos taurus GN=PPDPF PE=3 SV=1	M3VH95_PIG Pancreatic progenitor cell differentiation and proliferation factor homolog OS=Sus scrofa GN=PPDPF PE=4 SV=1	IPR026754:Pancreatic progenitor cell differentiation and proliferation factor	GO:0007275:multicellular organismal development; Biological Process;GO:0030154:cell differentiation; Biological Process;
BMGENE18740	1			\	\	BMGENE18740	\	\	\	\	\	\	\	LOC102166688	545820385	SAMD10	18129632	Samd10	34328389	SAMD10	300796319	\	Sterile alpha motif domain-containing protein 10 OS=Homo sapiens GN=SAMD10 PE=2 SV=1	E2REG9_CANFA Uncharacterized protein OS=Canis familiaris GN=SAMD10 PE=4 SV=1	IPR001660:Sterile alpha motif domain;IPR011510:Sterile alpha motif, type 2	GO:0005515:protein binding; Molecular Function;
BMGENE18766	1			\	\	BMGENE18766	\	\	\	\	\	\	\	\	\	C14orf180	56605684	A530016L24Rik	568979878	C21H14orf180	329665052	\	Transmembrane protein C14orf180 homolog OS=Bos taurus PE=2 SV=2	G5E5T8_BOVIN Uncharacterized protein OS=Bos taurus GN=C21H14orf180 PE=4 SV=1	IPR028114:Protein of unknown function DUF4658	GO:0016021:transmembrane protein c14orf180 homolog;
BMGENE18767	10			LWGENE08109	BKGENE03243	BMGENE18767	HAGENE16532	JHGENE18016	LAGENE03822	MSGENE16973	PIGENE17110	RCGENE11242	TPGENE13105	\	\	TMEM179	556695450	Tmem179	125660460	TMEM179	359077984	\	Transmembrane protein 179 OS=Homo sapiens GN=TMEM179 PE=2 SV=2	L8IBD3_BOSMU Transmembrane protein 179 OS=Bos grunniens mutus GN=M91_07058 PE=4 SV=1	\	\
BMGENE18787	10			LWGENE08079	BKGENE08192	BMGENE18787	HAGENE07359	JHGENE02582	LAGENE12362	MSGENE09764	PIGENE11846	RCGENE13891	TPGENE08356	\	\	THEM6	7706200	Them6	38348460	THEM6	150247068	\	UPF0670 protein THEM6 homolog OS=Bos taurus GN=THEM6 PE=2 SV=1	G1L3L4_AILME Uncharacterized protein (Fragment) OS=Ailuropoda melanoleuca GN=THEM6 PE=4 SV=1	\	\
BMGENE19215	10			LWGENE14987	BKGENE12134	BMGENE19215	HAGENE08340	JHGENE01117	LAGENE19590	MSGENE07034	PIGENE05089	RCGENE03093	TPGENE16017	\	\	OPA3	13376717	Opa3	110625722	OPA3	350539005	\	Optic atrophy 3 protein OS=Homo sapiens GN=OPA3 PE=1 SV=1	L8ID60_BOSMU Optic atrophy 3 protein-like protein (Fragment) OS=Bos grunniens mutus GN=M91_05733 PE=4 SV=1	IPR010754:Optic atrophy 3-like	\
BMGENE19966	1			\	\	BMGENE19966	\	\	\	\	\	\	\	\	\	OPHN1	768037775	Ophn1	16418475	OPHN1	741982745	\	Oligophrenin-1 OS=Pongo pygmaeus GN=OPHN1 PE=2 SV=1	K9INV3_DESRO Putative oligophrenin-1 OS=Desmodus rotundus PE=2 SV=1	\	\
BMGENE20573	1			\	\	BMGENE20573	\	\	\	\	\	\	\	\	\	\	\	Cebpzos	569001467	\	\	\	\	F1S4Q7_PIG Uncharacterized protein OS=Sus scrofa GN=LOC100522251 PE=4 SV=1	\	\
BMGENE20851	1			\	\	BMGENE20851	\	\	\	\	\	\	\	LOC100517674	311267290	KRTAP3-2	13994364	Krtap3-3	21536226	KRTAP3-3	116004425	\	Keratin-associated protein 3-2 OS=Mus musculus GN=Krtap3-2 PE=2 SV=2	G3IGG7_CRIGR Keratin-associated protein 3-2 OS=Cricetulus griseus GN=I79_022880 PE=4 SV=1	IPR007659:Keratin, high-sulphur matrix protein	GO:0005198:structural molecule activity; Molecular Function;GO:0045095:keratin filament; Cellular Component;
HAGENE00232	1			\	\	\	HAGENE00232	\	\	\	\	\	\	DEPDC1B	545877648	DEPDC1	38488716	Depdc1a	285401940	DEPDC1	194665711	\	DEP domain-containing protein 1A OS=Homo sapiens GN=DEPDC1 PE=1 SV=2	E1BA57_BOVIN Uncharacterized protein OS=Bos taurus GN=DEPDC1 PE=4 SV=2	IPR000198:Rho GTPase-activating protein domain;IPR000591:DEP domain	GO:0007165:signal transduction; Biological Process;GO:0035556:intracellular signal transduction; Biological Process;
HAGENE01253	1			\	\	\	HAGENE01253	\	\	\	\	\	\	\	\	CBFB	530424453	Cbfb	238814337	CBFB	300794490	\	Core-binding factor subunit beta OS=Homo sapiens GN=CBFB PE=1 SV=2	I3MH51_SPETR Uncharacterized protein OS=Spermophilus tridecemlineatus PE=4 SV=1	IPR003417:Core binding factor, beta subunit	GO:0003713:transcription coactivator activity; Molecular Function;GO:0005634:nucleus; Cellular Component;
HAGENE01611	1			\	\	\	HAGENE01611	\	\	\	\	\	\	\	\	IPO11	39725950	Ipo11	31541898	IPO11	741965474	\	Importin-11 OS=Mus musculus GN=Ipo11 PE=1 SV=1	F6WWH5_CALJA Uncharacterized protein OS=Callithrix jacchus GN=IPO11 PE=4 SV=1	\	GO:0005643:importin isoform cra_b;GO:0005737:importin isoform cra_b;GO:0006610:importin isoform cra_b;GO:0008565:importin isoform cra_b;
HAGENE05096	1			\	\	\	HAGENE05096	\	\	\	\	\	\	\	\	NUDCD1	578816217	Nudcd1	165905635	NUDCD1	741950416	\	NudC domain-containing protein 1 OS=Homo sapiens GN=NUDCD1 PE=1 SV=2	K9KEC9_HORSE NudC domain-containing protein 1-like protein (Fragment) OS=Equus caballus PE=2 SV=1	\	\
HAGENE06676	1			\	\	\	HAGENE06676	\	\	\	\	\	\	LOC100525089	545879729	C20orf27	385862238	1700037H04Rik	755500421	C13H20orf27	741948017	\	UPF0687 protein C20orf27 OS=Homo sapiens GN=C20orf27 PE=1 SV=3	M3X3E2_FELCA Uncharacterized protein OS=Felis catus GN=C20orf27 PE=4 SV=1	IPR026794:Uncharacterised protein family UPF0687	\
HAGENE10492	10			LWGENE10987	BKGENE01706	BMGENE09852	HAGENE10492	JHGENE05144	LAGENE18482	MSGENE02418	PIGENE06031	RCGENE14869	TPGENE10622	\	\	CCDC117	27735133	Ccdc117	164698436	CCDC117	157785639	\	Coiled-coil domain-containing protein 117 OS=Homo sapiens GN=CCDC117 PE=1 SV=1	J9PAV9_CANFA Uncharacterized protein OS=Canis familiaris GN=CCDC117 PE=4 SV=1	\	\
HAGENE11351	10			LWGENE15671	BKGENE13607	BMGENE12919	HAGENE11351	JHGENE03225	LAGENE16541	MSGENE03666	PIGENE05669	RCGENE08392	TPGENE15756	\	\	C16orf46	767989355	1700030J22Rik	58037165	C18H16orf46	528990138	\	Uncharacterized protein C16orf46 OS=Homo sapiens GN=C16orf46 PE=2 SV=2	L8HW05_BOSMU Uncharacterized protein OS=Bos grunniens mutus GN=M91_21381 PE=4 SV=1	IPR027836:Protein of unknown function DUF4529	GO:0005634:TPA: hypothetical protein isoform 1 [Bos taurus];GO:0005737:TPA: hypothetical protein isoform 1 [Bos taurus];
HAGENE11850	10			LWGENE12084	BKGENE17869	BMGENE16214	HAGENE11850	JHGENE00598	LAGENE11792	MSGENE19678	PIGENE19249	RCGENE12990	TPGENE08763	ARL14EPL	545812005	ARL14EP	22748693	Arl14ep	68299774	ARL14EP	528978123	\	ARL14 effector protein OS=Bos taurus GN=ARL14EP PE=2 SV=1	D2HP04_AILME Uncharacterized protein (Fragment) OS=Ailuropoda melanoleuca GN=ARL14EP PE=4 SV=1	IPR026515:ARF7 effector protein	\
HAGENE14131	1			\	\	\	HAGENE14131	\	\	\	\	\	\	CALHM1	545893733	CALHM3	193211395	Calhm1	124486909	LOC786442	358411860	\	Calcium homeostasis modulator protein 3 OS=Homo sapiens GN=CALHM3 PE=2 SV=1	L5K2L2_PTEAL Calcium homeostasis modulator protein 3 OS=Pteropus alecto GN=PAL_GLEAN10014229 PE=4 SV=1	\	\
HAGENE14917	6			LWGENE01309	BKGENE16955	BMGENE13883	HAGENE14917	\	\	MSGENE13933	\	RCGENE12918	\	\	\	C9orf142	39930541	BC029214	23956330	C11H9orf142	528970652	\	Uncharacterized protein C9orf142 OS=Homo sapiens GN=C9orf142 PE=1 SV=2	M3TYQ2_PIG Uncharacterized protein C9orf142 OS=Sus scrofa GN=C9orf142 PE=2 SV=1	IPR027873:Protein of unknown function DUF4610	\
HAGENE17922	1			\	\	\	HAGENE17922	\	\	\	\	\	\	\	\	COG5	240849567	Cog5	755541332	COG5	528946635	\	Conserved oligomeric Golgi complex subunit 5 OS=Mus musculus GN=Cog5 PE=2 SV=3	K9KBH9_HORSE Conserved oligomeric Golgi complex subunit 5-like protein (Fragment) OS=Equus caballus PE=2 SV=1	IPR019465:Conserved oligomeric Golgi complex subunit 5	GO:0006891:intra-Golgi vesicle-mediated transport; Biological Process;GO:0017119:Golgi transport complex; Cellular Component;
HAGENE19723	10			LWGENE02101	BKGENE03039	BMGENE15615	HAGENE19723	JHGENE18169	LAGENE06924	MSGENE03604	PIGENE19948	RCGENE00786	TPGENE15777	\	\	RPAIN	237858695	Rpain	58037173	RPAIN	115495063	\	RPA-interacting protein OS=Homo sapiens GN=RPAIN PE=1 SV=1	Q2TBS0_BOVIN RPA interacting protein OS=Bos taurus GN=RPAIN PE=2 SV=1	IPR028155:RPA-interacting protein, central domain;IPR028156:RPA-interacting protein;IPR028158:RPA-interacting protein, N-terminal domain;IPR028159:RPA-interacting protein, C-terminal domain	GO:0005730:rpa-interacting protein;
HAGENE20141	9			LWGENE03712	BKGENE20129	BMGENE20268	HAGENE20141	\	LAGENE20110	MSGENE20255	PIGENE20236	RCGENE19985	TPGENE20271	\	\	RAP1GDS1	155030202	Rap1gds1	100818462	RAP1GDS1	88319933	\	Rap1 GTPase-GDP dissociation stimulator 1 OS=Bos taurus GN=RAP1GDS1 PE=1 SV=1	D6RE95_HUMAN Rap1 GTPase-GDP dissociation stimulator 1 OS=Homo sapiens GN=RAP1GDS1 PE=2 SV=1	\	\
HAGENE20389	1			\	\	\	HAGENE20389	\	\	\	\	\	\	LOC102166688	545820385	SAMD10	530418665	Samd10	755502295	SAMD10	300796319	\	Sterile alpha motif domain-containing protein 10 OS=Homo sapiens GN=SAMD10 PE=2 SV=1	E2REG9_CANFA Uncharacterized protein OS=Canis familiaris GN=SAMD10 PE=4 SV=1	IPR001660:Sterile alpha motif domain;IPR011510:Sterile alpha motif, type 2	GO:0005515:protein binding; Molecular Function;
HAGENE20487	1			\	\	\	HAGENE20487	\	\	\	\	\	\	LOC100517674	311267290	KRTAP3-2	13994364	Krtap3-3	21536226	KRTAP3-3	116004425	\	Keratin-associated protein 3-2 OS=Mus musculus GN=Krtap3-2 PE=2 SV=2	G3IGG7_CRIGR Keratin-associated protein 3-2 OS=Cricetulus griseus GN=I79_022880 PE=4 SV=1	IPR007659:Keratin, high-sulphur matrix protein	GO:0005198:structural molecule activity; Molecular Function;GO:0045095:keratin filament; Cellular Component;
JHGENE00072	7			LWGENE00848	BKGENE08834	BMGENE01667	HAGENE14972	JHGENE00072	\	MSGENE16497	\	RCGENE11694	\	LY6G6F	305855219	LY6G6F	51242941	Ly6g6f	253683539	LY6G6F	529003637	\	Lymphocyte antigen 6 complex locus protein G6f OS=Bos taurus GN=LY6G6F PE=2 SV=1	B9TSQ6_PIG C6orf21 OS=Sus scrofa PE=2 SV=1	IPR003599:Immunoglobulin subtype;IPR007110:Immunoglobulin-like domain;IPR013106:Immunoglobulin V-set domain;IPR026524:Lymphocyte antigen 6 complex locus protein G6d/G6f	GO:0005515:protein binding; Molecular Function;
JHGENE01588	1			\	\	\	\	JHGENE01588	\	\	\	\	\	\	\	CCDC134	530420388	Ccdc134	116268089	CCDC134	329663339	\	Coiled-coil domain-containing protein 134 OS=Rattus norvegicus GN=Ccdc134 PE=2 SV=1	M3WKF7_FELCA Uncharacterized protein OS=Felis catus GN=CCDC134 PE=4 SV=1	IPR026321:Coiled-coil domain-containing protein 134	\
JHGENE04533	10			LWGENE16950	BKGENE08303	BMGENE04360	HAGENE18177	JHGENE04533	LAGENE15055	MSGENE06019	PIGENE13461	RCGENE14739	TPGENE18385	\	\	MANSC1	31542650	Mansc1	13385846	MANSC1	115497702	\	MANSC domain-containing protein 1 OS=Homo sapiens GN=MANSC1 PE=2 SV=1	Q0VC64_BOVIN MANSC domain containing 1 OS=Bos taurus GN=MANSC1 PE=2 SV=1	IPR011106:Seven cysteines, N-terminal;IPR013980:Seven cysteines	\
JHGENE06655	10			LWGENE08434	BKGENE14735	BMGENE16490	HAGENE14130	JHGENE06655	LAGENE15557	MSGENE10151	PIGENE11099	RCGENE10965	TPGENE18583	CALHM1	545893733	CALHM3	193211395	Calhm1	124486909	LOC786442	358411860	\	Calcium homeostasis modulator protein 3 OS=Homo sapiens GN=CALHM3 PE=2 SV=1	L5K2L2_PTEAL Calcium homeostasis modulator protein 3 OS=Pteropus alecto GN=PAL_GLEAN10014229 PE=4 SV=1	\	\
JHGENE07109	5			LWGENE09250	\	BMGENE08972	HAGENE12189	JHGENE07109	\	\	PIGENE12591	\	\	FAM168A	545847468	FAM168B	767916630	Fam168b	33239370	FAM168B	528938579	\	Myelin-associated neurite-outgrowth inhibitor OS=Homo sapiens GN=FAM168B PE=1 SV=1	F6Y4V6_HORSE Uncharacterized protein (Fragment) OS=Equus caballus GN=LOC100067394 PE=4 SV=1	\	GO:0005886:family with sequence similarity member b;GO:0016021:family with sequence similarity member b;GO:0030424:family with sequence similarity member b;GO:0048471:family with sequence similarity member b;
JHGENE09602	1			\	\	\	\	JHGENE09602	\	\	\	\	\	NUTM2G	545876484	NUTM2A	767963680	Nutm2	85701903	LOC617539	741936755	\	Protein FAM22D OS=Homo sapiens GN=FAM22D PE=2 SV=2	I3L9D6_PIG Uncharacterized protein (Fragment) OS=Sus scrofa PE=4 SV=1	IPR024310:Nuclear Testis protein/FAM22;IPR024313:Nuclear Testis protein, C-terminal	\
JHGENE10092	1			\	\	\	\	JHGENE10092	\	\	\	\	\	DLC1	545878672	DLC1	256017150	Dlc1	755525051	\	\	\	Rho GTPase-activating protein 7 OS=Homo sapiens GN=DLC1 PE=1 SV=4	F6UE79_MACMU Uncharacterized protein OS=Macaca mulatta GN=DLC1 PE=2 SV=1	\	GO:0005622:rho gtpase-activating protein 7 isoform 1;GO:0007165:rho gtpase-activating protein 7 isoform 1;
JHGENE12277	1			\	\	\	\	JHGENE12277	\	\	\	\	\	DEPDC1B	545877648	DEPDC1	38488716	Depdc1a	285401940	DEPDC1	194665711	\	DEP domain-containing protein 1A OS=Homo sapiens GN=DEPDC1 PE=1 SV=2	E1BA57_BOVIN Uncharacterized protein OS=Bos taurus GN=DEPDC1 PE=4 SV=2	IPR000591:DEP domain	GO:0035556:intracellular signal transduction; Biological Process;
JHGENE12924	10			LWGENE03573	BKGENE09663	BMGENE19378	HAGENE07441	JHGENE12924	LAGENE06746	MSGENE08971	PIGENE12749	RCGENE12595	TPGENE06249	LOC100620080	545894661	C7orf26	21362070	E130309D02Rik	170650679	C25H7orf26	115496065	\	Uncharacterized protein C7orf26 OS=Homo sapiens GN=C7orf26 PE=2 SV=1	L5L2F0_PTEAL Uncharacterized protein OS=Pteropus alecto GN=PAL_GLEAN10018956 PE=4 SV=1	IPR027844:Protein of unknown function DUF4507	\
JHGENE14607	10			LWGENE10373	BKGENE00001	BMGENE11213	HAGENE08619	JHGENE14607	LAGENE13570	MSGENE08137	PIGENE00001	RCGENE08174	TPGENE01747	ZG16	545890180	ZG16B	94536866	Dcpp3	569001248	LOC100295741	741901963	\	Zymogen granule protein 16 homolog B OS=Homo sapiens GN=ZG16B PE=1 SV=3	L8J642_BOSMU Uncharacterized protein (Fragment) OS=Bos grunniens mutus GN=M91_18799 PE=4 SV=1	IPR001229:Mannose-binding lectin	\
JHGENE15051	1			\	\	\	\	JHGENE15051	\	\	\	\	\	\	\	YIPF4	530368185	Yipf4	28076889	YIPF4	741942541	\	Protein YIPF4 OS=Homo sapiens GN=YIPF4 PE=1 SV=1	D2I1R6_AILME Putative uncharacterized protein (Fragment) OS=Ailuropoda melanoleuca GN=PANDA_019255 PE=4 SV=1	IPR006977:Yip1 domain	GO:0016020:membrane; Cellular Component;
JHGENE18015	1			\	\	\	\	JHGENE18015	\	\	\	\	\	\	\	C14orf180	56605684	A530016L24Rik	568979878	C21H14orf180	329665052	\	Transmembrane protein C14orf180 homolog OS=Bos taurus PE=2 SV=2	G5E5T8_BOVIN Uncharacterized protein OS=Bos taurus GN=C21H14orf180 PE=4 SV=1	IPR028114:Protein of unknown function DUF4658	GO:0016021:transmembrane protein c14orf180 homolog;
JHGENE19374	1			\	\	\	\	JHGENE19374	\	\	\	\	\	\	\	FRMD3	350276220	2310002L09Rik	239937495	FRMD3	114052346	\	FERM domain-containing protein 3 OS=Homo sapiens GN=FRMD3 PE=2 SV=1	I3N8G9_SPETR Uncharacterized protein OS=Spermophilus tridecemlineatus PE=4 SV=1	\	GO:0005737:ferm domain-containing protein 3 isoform 5;GO:0005856:ferm domain-containing protein 3 isoform 5;GO:0008092:ferm domain-containing protein 3 isoform 5;GO:0016021:ferm domain-containing protein 3 isoform 5;GO:0019898:ferm domain-containing protein 3 isoform 5;
JHGENE19663	10			LWGENE06949	BKGENE17129	BMGENE18520	HAGENE09586	JHGENE19663	LAGENE01930	MSGENE00358	PIGENE14278	RCGENE04052	TPGENE03701	\	\	KIAA1524	190194355	C330027C09Rik	125858491	KIAA1524	157074086	\	Protein CIP2A OS=Homo sapiens GN=KIAA1524 PE=1 SV=2	G1L2E2_AILME Uncharacterized protein OS=Ailuropoda melanoleuca GN=KIAA1524 PE=4 SV=1	IPR013878:Mo25-like	\
JHGENE20433	1			\	\	\	\	JHGENE20433	\	\	\	\	\	\	\	\	\	Cebpzos	569001467	\	\	\	\	F1S4Q7_PIG Uncharacterized protein OS=Sus scrofa GN=LOC100522251 PE=4 SV=1	\	\
LAGENE01281	10			LWGENE06707	BKGENE12872	BMGENE08710	HAGENE00377	JHGENE12491	LAGENE01281	MSGENE03345	PIGENE02128	RCGENE08914	TPGENE09088	\	\	GID4	23111007	Gid4	254939696	GID4	315113887	\	Glucose-induced degradation protein 4 homolog OS=Homo sapiens GN=GID4 PE=2 SV=1	F1N0P9_BOVIN Uncharacterized protein OS=Bos taurus GN=GID4 PE=2 SV=2	IPR018618:Vacuolar import/degradation protein Vid24	\
LAGENE03412	10			LWGENE12192	BKGENE08783	BMGENE16945	HAGENE03639	JHGENE12269	LAGENE03412	MSGENE11400	PIGENE10220	RCGENE07577	TPGENE13327	\	\	C1orf109	8923469	9930104L06Rik	568928668	C3H1orf109	156120433	\	Uncharacterized protein C1orf109 OS=Homo sapiens GN=C1orf109 PE=2 SV=1	M3VK16_PIG Chromosome 1 open reading frame 109 OS=Sus scrofa GN=C1orf109 PE=2 SV=1	\	\
LAGENE03821	1			\	\	\	\	\	LAGENE03821	\	\	\	\	\	\	C14orf180	56605684	A530016L24Rik	568979878	C21H14orf180	329665052	\	Transmembrane protein C14orf180 homolog OS=Bos taurus PE=2 SV=2	G5E5T8_BOVIN Uncharacterized protein OS=Bos taurus GN=C21H14orf180 PE=4 SV=1	IPR028114:Protein of unknown function DUF4658	GO:0016021:transmembrane protein c14orf180 homolog;
LAGENE04513	10			LWGENE16057	BKGENE01740	BMGENE17263	HAGENE05166	JHGENE07162	LAGENE04513	MSGENE05460	PIGENE05016	RCGENE01570	TPGENE06290	SDPR	545875076	PTRF	42734430	Ptrf	6679567	PTRF	162287374	\	Polymerase I and transcript release factor OS=Rattus norvegicus GN=Ptrf PE=1 SV=1	D2HIT5_AILME Uncharacterized protein (Fragment) OS=Ailuropoda melanoleuca GN=PTRF PE=4 SV=1	IPR026752:Cavin family	GO:0005634:polymerase i and transcript release factor-like;GO:0005739:polymerase i and transcript release factor-like;GO:0005901:polymerase i and transcript release factor-like;GO:0006361:polymerase i and transcript release factor-like;GO:0006363:polymerase i and transcript release factor-like;GO:0042134:polymerase i and transcript release factor-like;
LAGENE04654	1			\	\	\	\	\	LAGENE04654	\	\	\	\	\	\	SCAPER	767984364	Scaper	755530150	SCAPER	741898304	\	S phase cyclin A-associated protein in the endoplasmic reticulum OS=Homo sapiens GN=SCAPER PE=1 SV=1	F6UTC6_HORSE Uncharacterized protein (Fragment) OS=Equus caballus GN=SCAPER PE=4 SV=1	\	GO:0005634:hypothetical protein [Homo sapiens];GO:0005783:hypothetical protein [Homo sapiens];GO:0008270:hypothetical protein [Homo sapiens];GO:0046872:hypothetical protein [Homo sapiens];
LAGENE05778	10			LWGENE01244	BKGENE16891	BMGENE13380	HAGENE14854	JHGENE09140	LAGENE05778	MSGENE13834	PIGENE02583	RCGENE09216	TPGENE11950	\	\	SURF2	524556904	Surf2	568913239	SURF2	359070717	\	Surfeit locus protein 2 OS=Homo sapiens GN=SURF2 PE=1 SV=3	F1MBD5_BOVIN Uncharacterized protein (Fragment) OS=Bos taurus GN=SURF2 PE=4 SV=2	IPR008833:Surfeit locus 2	\
LAGENE08757	6			LWGENE08614	\	\	HAGENE01620	JHGENE12361	LAGENE08757	MSGENE10292	PIGENE13289	\	\	\	\	LOC644277	767970964	Gm32742	755529623	LOC104974213	741951428	\	\	L9KP34_TUPCH Uncharacterized protein OS=Tupaia chinensis GN=TREES_T100013242 PE=4 SV=1	\	\
LAGENE09806	1			\	\	\	\	\	LAGENE09806	\	\	\	\	\	\	CCDC134	530420388	Ccdc134	116268089	CCDC134	329663339	\	Coiled-coil domain-containing protein 134 OS=Rattus norvegicus GN=Ccdc134 PE=2 SV=1	M3WKF7_FELCA Uncharacterized protein OS=Felis catus GN=CCDC134 PE=4 SV=1	IPR026321:Coiled-coil domain-containing protein 134	\
LAGENE09975	10			LWGENE02260	BKGENE18435	BMGENE05980	HAGENE10386	JHGENE08766	LAGENE09975	MSGENE17452	PIGENE04232	RCGENE03894	TPGENE14503	RSBN1	545823621	RSBN1L	158534055	Rsbn1l	124430547	RSBN1L	76662501	\	Round spermatid basic protein 1-like protein OS=Homo sapiens GN=RSBN1L PE=1 SV=2	M3VH97_PIG Round spermatid basic protein 1-like protein OS=Sus scrofa GN=RSBN1L PE=2 SV=1	IPR026306:Round spermatid basic protein 1	GO:0005634:nucleus; Cellular Component;
LAGENE14126	1			\	\	\	\	\	LAGENE14126	\	\	\	\	DEPDC1B	545877648	DEPDC1	38488716	Depdc1a	285401940	DEPDC1	194665711	\	DEP domain-containing protein 1A OS=Homo sapiens GN=DEPDC1 PE=1 SV=2	E1BA57_BOVIN Uncharacterized protein OS=Bos taurus GN=DEPDC1 PE=4 SV=2	IPR000198:Rho GTPase-activating protein domain;IPR000591:DEP domain	GO:0007165:signal transduction; Biological Process;GO:0035556:intracellular signal transduction; Biological Process;
LAGENE14503	10			LWGENE19526	BKGENE17984	BMGENE11126	HAGENE17885	JHGENE19501	LAGENE14503	MSGENE19526	PIGENE13575	RCGENE17455	TPGENE09772	\	\	MCPH1	122891872	Mcph1	568953309	MCPH1	157074146	\	Microcephalin OS=Pongo pygmaeus GN=MCPH1 PE=3 SV=1	A8KC69_BOVIN MCPH1 protein (Fragment) OS=Bos taurus GN=MCPH1 PE=2 SV=1	IPR001357:BRCT domain;IPR022047:Microcephalin	\
LAGENE15558	1			\	\	\	\	\	LAGENE15558	\	\	\	\	CALHM1	545893733	CALHM3	193211395	Calhm1	124486909	LOC786442	358411860	\	Calcium homeostasis modulator protein 3 OS=Homo sapiens GN=CALHM3 PE=2 SV=1	L5K2L2_PTEAL Calcium homeostasis modulator protein 3 OS=Pteropus alecto GN=PAL_GLEAN10014229 PE=4 SV=1	\	\
LAGENE17955	1			\	\	\	\	\	LAGENE17955	\	\	\	\	DOCK7	545835795	DOCK6	768003236	Dock6	755528914	DOCK6	328887922	\	Dedicator of cytokinesis protein 6 OS=Homo sapiens GN=DOCK6 PE=1 SV=3	M1EJG4_MUSPF Dedicator of cytokinesis 6 (Fragment) OS=Mustela putorius furo PE=2 SV=1	IPR021816:Dedicator of cytokinesis C/D, N-terminal;IPR026791:Dedicator of cytokinesis;IPR026798:Dedicator of cytokinesis C	GO:0005085:guanyl-nucleotide exchange factor activity; Molecular Function;GO:0007264:small GTPase mediated signal transduction; Biological Process;
LAGENE18223	1			\	\	\	\	\	LAGENE18223	\	\	\	\	TMC4	335290169	TMC8	767993768	Tmc8	568973528	TMC8	741964883	\	Transmembrane channel-like protein 8 OS=Mus musculus GN=Tmc8 PE=2 SV=2	L8HRL9_BOSMU Transmembrane channel-like protein 8 (Fragment) OS=Bos grunniens mutus GN=M91_08211 PE=4 SV=1	\	GO:0016021:transmembrane channel-like protein 8-like;
LAGENE20324	1			\	\	\	\	\	LAGENE20324	\	\	\	\	LOC100517674	311267290	KRTAP3-2	13994364	Krtap3-3	21536226	KRTAP3-3	116004425	\	Keratin-associated protein 3-2 OS=Mus musculus GN=Krtap3-2 PE=2 SV=2	G3IGG7_CRIGR Keratin-associated protein 3-2 OS=Cricetulus griseus GN=I79_022880 PE=4 SV=1	IPR007659:Keratin, high-sulphur matrix protein	GO:0005198:structural molecule activity; Molecular Function;GO:0045095:keratin filament; Cellular Component;
LWGENE00844	10			LWGENE00844	BKGENE08838	BMGENE01671	HAGENE14968	JHGENE00076	LAGENE10161	MSGENE16493	PIGENE08076	RCGENE11690	TPGENE18717	\	\	C6orf25	19913377	G6b	300360565	C23H6orf25	741971031	\	Protein G6b OS=Homo sapiens GN=G6B PE=1 SV=1	B0UXC6_HUMAN Protein C6orf25 OS=Homo sapiens GN=C6orf25 PE=2 SV=1	IPR007110:Immunoglobulin-like domain;IPR028070:G6B family	GO:0005515:protein binding; Molecular Function;GO:0016021:integral to membrane; Cellular Component;
LWGENE01279	3			LWGENE01279	\	\	HAGENE14889	\	\	\	PIGENE16490	\	\	\	\	MGC50722	767957437	4932418E24Rik	755497677	LOC787891	741944762	\	\	F1MDL7_BOVIN Uncharacterized protein (Fragment) OS=Bos taurus PE=4 SV=2	\	\
LWGENE01300	9			LWGENE01300	BKGENE16946	BMGENE13874	HAGENE14909	JHGENE09191	LAGENE02472	MSGENE13924	PIGENE16509	RCGENE12909	\	\	\	C9orf172	148762978	Gm996	148762971	C11H9orf172	741945012	\	Uncharacterized protein C9orf172 OS=Homo sapiens GN=C9orf172 PE=3 SV=1	H0XHQ5_OTOGA Uncharacterized protein OS=Otolemur garnettii GN=C9orf172 PE=4 SV=1	IPR002893:Zinc finger, MYND-type	\
LWGENE02443	10			LWGENE02443	BKGENE11207	BMGENE12308	HAGENE00077	JHGENE19772	LAGENE16449	MSGENE06364	PIGENE03738	RCGENE16948	TPGENE19460	\	\	\	\	\	\	\	\	\	\	G1SAZ4_NOMLE Uncharacterized protein OS=Nomascus leucogenys PE=4 SV=1	\	GO:0005789:AF130117_7PRO0845 [Homo sapiens];GO:0016021:AF130117_7PRO0845 [Homo sapiens];
LWGENE02948	10			LWGENE02948	BKGENE09015	BMGENE09342	HAGENE00146	JHGENE07523	LAGENE06715	MSGENE06115	PIGENE05373	RCGENE10463	TPGENE00487	ITPRIP	545871805	ITPRIPL1	57164962	Itpripl1	568918564	ITPRIPL1	741942156	\	Inositol 1,4,5-trisphosphate receptor-interacting protein-like 1 OS=Homo sapiens GN=ITPRIPL1 PE=1 SV=1	M3VH37_PIG Inositol 1,4,5-trisphosphate receptor interacting protein-like 1 tv2 OS=Sus scrofa GN=ITPRIPL1 PE=2 SV=1	IPR020950:Protein male abnormal 21-related;IPR024808:Inositol 1,4,5-triphosphate receptor-interacting protein-like 1;IPR024810:Mab-21 domain;IPR026250:Inositol 1,4,5-trisphosphate receptor-interacting protein	\
LWGENE06572	10			LWGENE06572	BKGENE09552	BMGENE13144	HAGENE11690	JHGENE18103	LAGENE09891	MSGENE09661	PIGENE05526	RCGENE07849	TPGENE15837	\	\	JKAMP	21361537	Jkamp	21312774	JKAMP	528966724	\	JNK1/MAPK8-associated membrane protein OS=Mus musculus GN=Jkamp PE=1 SV=2	A6H7J5_BOVIN JAMP protein OS=Bos taurus GN=JAMP PE=2 SV=1	IPR008485:Protein of unknown function DUF766	GO:0030433:jamp protein;GO:0031625:jamp protein;
LWGENE06694	10			LWGENE06694	BKGENE12885	BMGENE08697	HAGENE00390	JHGENE06568	LAGENE01271	MSGENE03333	PIGENE02115	RCGENE08902	TPGENE00298	TRIOBP	335287650	MPRIP	50980307	Mprip	41152239	MPRIP	157785631	\	Myosin phosphatase Rho-interacting protein OS=Homo sapiens GN=MPRIP PE=1 SV=3	M3V857_PIG Myosin phosphatase Rho interacting protein OS=Sus scrofa GN=MPRIP PE=2 SV=1	IPR001849:Pleckstrin homology domain	GO:0005515:protein binding; Molecular Function;GO:0005543:phospholipid binding; Molecular Function;
LWGENE07667	10			LWGENE07667	BKGENE08324	BMGENE01031	HAGENE17619	JHGENE10263	LAGENE01506	MSGENE08233	PIGENE04684	RCGENE04521	TPGENE13748	\	\	VOPP1	106507239	Vopp1	22122699	VOPP1	116004161	\	Vesicular, overexpressed in cancer, prosurvival protein 1 OS=Rattus norvegicus GN=Vopp1 PE=2 SV=1	M3Z378_MUSPF Uncharacterized protein OS=Mustela putorius furo GN=VOPP1 PE=4 SV=1	IPR026229:Vesicular, overexpressed in cancer, prosurvival protein 1	GO:0004871:overexpressed in prosurvival protein 1 precursor;GO:0005768:overexpressed in prosurvival protein 1 precursor;GO:0006355:overexpressed in prosurvival protein 1 precursor;GO:0007165:overexpressed in prosurvival protein 1 precursor;GO:0030659:cytoplasmic vesicle membrane; Cellular Component;GO:0031301:overexpressed in prosurvival protein 1 precursor;
LWGENE09415	10			LWGENE09415	BKGENE01846	BMGENE06496	HAGENE06158	JHGENE18351	LAGENE00947	MSGENE04624	PIGENE09627	RCGENE06709	TPGENE03160	SKIDA1	311265808	C17orf96	194578898	E130012A19Rik	111185892	C19H17orf96	741963617	\	Uncharacterized protein C17orf96 OS=Homo sapiens GN=C17orf96 PE=1 SV=1	G5E6S7_BOVIN Uncharacterized protein OS=Bos taurus GN=C19H17orf96 PE=4 SV=1	IPR027971:Protein of unknown function DUF4584	\
LWGENE09925	10			LWGENE09925	BKGENE11346	BMGENE10527	HAGENE10557	JHGENE09454	LAGENE11732	MSGENE13664	PIGENE10511	RCGENE17457	TPGENE01772	SPIN1	305855168	SPIN4	108796661	Spin4	30520207	SPIN4	529015589	\	Spindlin-4 OS=Homo sapiens GN=SPIN4 PE=2 SV=1	L8IV04_BOSMU Spindlin-4 OS=Bos grunniens mutus GN=M91_08969 PE=4 SV=1	IPR003671:Spindlin/spermiogenesis-specific protein	GO:0007276:gamete generation; Biological Process;
LWGENE11233	10			LWGENE11233	BKGENE10284	BMGENE09792	HAGENE16366	JHGENE11203	LAGENE10604	MSGENE20379	PIGENE02098	RCGENE11090	TPGENE03796	LOC100517287	350585655	PRAME	619328989	Pramef8	569020542	LOC100849792	741906405	\	Melanoma antigen preferentially expressed in tumors OS=Homo sapiens GN=PRAME PE=1 SV=1	M3X5B4_FELCA Uncharacterized protein OS=Felis catus GN=PRAME PE=4 SV=1	IPR026292:PRAME family/Leucine-rich repeat-containing protein 14	\
LWGENE11561	10			LWGENE11561	BKGENE03766	BMGENE02702	HAGENE19526	JHGENE12149	LAGENE07488	MSGENE02858	PIGENE12966	RCGENE18633	TPGENE12081	\	\	TCTA	11560141	Tcta	568962726	TCTA	77736558	\	T-cell leukemia translocation-altered gene protein homolog OS=Bos taurus GN=TCTA PE=3 SV=1	L8IUU7_BOSMU Uncharacterized protein OS=Bos grunniens mutus GN=M91_12440 PE=4 SV=1	IPR016560:T-cell leukemia translocation-altered gene protein	GO:0016021:t-cell leukemia translocation altered gene;
LWGENE11632	9			LWGENE11632	BKGENE03943	BMGENE03269	HAGENE19680	JHGENE00949	LAGENE01743	\	PIGENE03556	RCGENE19593	TPGENE17718	\	\	SCAPER	767984364	Scaper	568961479	SCAPER	741966927	\	S phase cyclin A-associated protein in the endoplasmic reticulum OS=Homo sapiens GN=SCAPER PE=1 SV=1	H0VG15_CAVPO Uncharacterized protein (Fragment) OS=Cavia porcellus GN=LOC100732071 PE=4 SV=1	\	GO:0005622:s phase cyclin a-associated protein in the endoplasmic reticulum;GO:0008270:s phase cyclin a-associated protein in the endoplasmic reticulum;
LWGENE14572	10			LWGENE14572	BKGENE04494	BMGENE05183	HAGENE04105	JHGENE06338	LAGENE00042	MSGENE01311	PIGENE04504	RCGENE14319	TPGENE00166	\	\	ITPRIPL2	77798169	Itpripl2	83921560	ITPRIPL2	529006665	\	Inositol 1,4,5-trisphosphate receptor-interacting protein-like 2 OS=Homo sapiens GN=ITPRIPL2 PE=2 SV=1	M3Z7K4_MUSPF Uncharacterized protein OS=Mustela putorius furo GN=Itpripl2 PE=4 SV=1	IPR020950:Protein male abnormal 21-related;IPR024798:Inositol 1,4,5-triphosphate receptor-interacting protein-like 2;IPR024810:Mab-21 domain;IPR026250:Inositol 1,4,5-trisphosphate receptor-interacting protein	\
LWGENE14676	10			LWGENE14676	BKGENE10827	BMGENE00956	HAGENE09648	JHGENE13482	LAGENE16578	MSGENE11959	PIGENE16756	RCGENE18495	TPGENE19688	\	\	NOL7	530382134	Nol7	117647257	NOL7	77735715	\	Nucleolar protein 7 OS=Homo sapiens GN=NOL7 PE=1 SV=2	M3VK30_PIG Nucleolar protein 7, 27kDa OS=Sus scrofa GN=NOL7 PE=2 SV=1	IPR012579:NUC129	GO:0005634:nucleus; Cellular Component;GO:0005730:nucleolar protein 7-like;GO:0005739:nucleolar protein 7-like;
LWGENE15314	10			LWGENE15314	BKGENE15036	BMGENE01612	HAGENE09337	JHGENE08906	LAGENE13337	MSGENE12548	PIGENE19361	RCGENE03755	TPGENE04273	\	\	CCDC184	197245386	Ccdc184	226053365	CCDC184	118151226	\	Uncharacterized protein C12orf68 homolog OS=Bos taurus PE=2 SV=1	L8I201_BOSMU Uncharacterized protein OS=Bos grunniens mutus GN=M91_21476 PE=4 SV=1	\	GO:0005737:uncharacterized protein c12orf68 homolog;
LWGENE16951	10			LWGENE16951	BKGENE18368	BMGENE04359	HAGENE18176	JHGENE04532	LAGENE15054	MSGENE04699	PIGENE13462	RCGENE14740	TPGENE18384	LOC100622265	335309687	LOH12CR1	17157999	Loh12cr1	27754073	LOH12CR1	115496642	\	Loss of heterozygosity 12 chromosomal region 1 protein homolog OS=Bos taurus GN=LOH12CR1 PE=2 SV=1	G5BYG0_HETGA Loss of heterozygosity 12 chromosomal region 1 protein OS=Heterocephalus glaber GN=GW7_02283 PE=4 SV=1	IPR018780:Tumour suppressor protein, LOH1CR12	\
LWGENE17276	10			LWGENE17276	BKGENE20255	BMGENE20301	HAGENE20166	JHGENE20142	LAGENE20059	MSGENE20216	PIGENE20196	RCGENE20008	TPGENE20300	NLRC5	523580072	NLRC5	767990671	\	\	NLRC5	528991054	\	Protein NLRC5 OS=Homo sapiens GN=NLRC5 PE=1 SV=3	M4MEX3_PIG NLRC5 OS=Sus scrofa GN=NLRC5 PE=2 SV=1	\	\
LWGENE17372	1			LWGENE17372	\	\	\	\	\	\	\	\	\	\	\	DNAH14	767912170	Dnah14	568888028	DNAH14	741954050	\	Dynein heavy chain 14, axonemal OS=Homo sapiens GN=DNAH14 PE=2 SV=3	G1MBG8_AILME Uncharacterized protein (Fragment) OS=Ailuropoda melanoleuca PE=4 SV=1	\	GO:0003777:hypothetical protein PANDA_017989 [Ailuropoda melanoleuca];GO:0007018:hypothetical protein PANDA_017989 [Ailuropoda melanoleuca];
LWGENE17416	1			LWGENE17416	\	\	\	\	\	\	\	\	\	\	\	STK11IP	767916458	Stk11ip	755493558	STK11IP	741873347	\	Serine/threonine-protein kinase 11-interacting protein OS=Homo sapiens GN=STK11IP PE=1 SV=3	M3VH99_PIG Serine/threonine kinase 11 interacting protein OS=Sus scrofa GN=STK11IP PE=2 SV=1	\	\
LWGENE18793	10			LWGENE18793	BKGENE10574	BMGENE07612	HAGENE11049	JHGENE06698	LAGENE10122	MSGENE02695	PIGENE11229	RCGENE18845	TPGENE15295	TNFAIP8	545812037	TNFAIP8L1	768000816	Tnfaip8l1	31560244	TNFAIP8L1	741932589	\	Tumor necrosis factor alpha-induced protein 8-like protein 1 OS=Bos taurus GN=TNFAIP8L1 PE=2 SV=1	L5L841_PTEAL Tumor necrosis factor, alpha-induced protein 8-like protein 1 OS=Pteropus alecto GN=PAL_GLEAN10006074 PE=4 SV=1	IPR008477:Protein of unknown function DUF758	\
LWGENE18988	10			LWGENE18988	BKGENE20118	BMGENE17969	HAGENE17411	JHGENE04133	LAGENE00161	MSGENE11788	PIGENE05798	RCGENE14102	TPGENE14054	\	\	PRR7	767938660	Prr7	71892426	PRR7	300796754	\	Proline-rich protein 7 OS=Rattus norvegicus GN=Prr7 PE=1 SV=1	H0XSJ1_OTOGA Uncharacterized protein OS=Otolemur garnettii GN=PRR7 PE=4 SV=1	IPR021684:Uncharacterised protein family WW domain-binding protein 1	\
LWGENE20619	10			LWGENE20619	BKGENE20569	BMGENE20603	HAGENE20644	JHGENE20412	LAGENE20450	MSGENE20465	PIGENE20525	RCGENE20380	TPGENE18522	\	\	TIFAB	149773462	Tifab	568983259	TIFAB	528956789	\	TRAF-interacting protein with FHA domain-containing protein B OS=Homo sapiens GN=TIFAB PE=1 SV=2	L8IUL2_BOSMU TRAF-interacting protein with FHA domain-containing protein B (Fragment) OS=Bos grunniens mutus GN=M91_21038 PE=4 SV=1	IPR000253:Forkhead-associated (FHA) domain	GO:0005515:protein binding; Molecular Function;
MSGENE01454	1			\	\	\	\	\	\	MSGENE01454	\	\	\	\	\	CCDC134	530420388	Ccdc134	116268089	CCDC134	329663339	\	Coiled-coil domain-containing protein 134 OS=Rattus norvegicus GN=Ccdc134 PE=2 SV=1	M3WKF7_FELCA Uncharacterized protein OS=Felis catus GN=CCDC134 PE=4 SV=1	IPR026321:Coiled-coil domain-containing protein 134	\
MSGENE02536	1			\	\	\	\	\	\	MSGENE02536	\	\	\	NIPAL1	335307736	NIPA2	57164953	Nipa2	568948779	NIPA2	77735549	\	Magnesium transporter NIPA2 OS=Bos taurus GN=NIPA2 PE=2 SV=1	Q9CSH1_MOUSE Putative uncharacterized protein (Fragment) OS=Mus musculus GN=Nipa2 PE=2 SV=1	IPR008521:Magnesium transporter NIPA	GO:0005515:unnamed protein product [Mus musculus];GO:0005769:unnamed protein product [Mus musculus];GO:0005886:unnamed protein product [Mus musculus];GO:0015095:magnesium ion transmembrane transporter activity; Molecular Function;GO:0015693:magnesium ion transport; Biological Process;GO:0016020:membrane; Cellular Component;GO:0016021:unnamed protein product [Mus musculus];GO:0034220:unnamed prote…
MSGENE02539	10			LWGENE13380	BKGENE13264	BMGENE05790	HAGENE16041	JHGENE00927	LAGENE17838	MSGENE02539	PIGENE03141	RCGENE02851	TPGENE09781	TDRP1	312062801	TDRP	578815012	Tdrp	568953535	TDRP	528938363	\	Testis development-related protein OS=Homo sapiens GN=TDRP PE=1 SV=2	E3UV39_PIG Testis development-related protein 1 OS=Sus scrofa GN=TDRP1 PE=2 SV=1	\	\
MSGENE02970	9			LWGENE13262	BKGENE09158	BMGENE01106	HAGENE18907	JHGENE18666	LAGENE16554	MSGENE02970	\	RCGENE07639	TPGENE07395	ZNF292	311244141	ZNF654	112734859	Zfp654	755554062	ZNF654	528936027	\	Zinc finger protein 654 OS=Homo sapiens GN=ZNF654 PE=1 SV=3	L5JML4_PTEAL Zinc finger protein 654 OS=Pteropus alecto GN=PAL_GLEAN10016393 PE=4 SV=1	IPR007087:Zinc finger, C2H2;IPR015880:Zinc finger, C2H2-like	GO:0046872:metal ion binding; Molecular Function;
MSGENE03144	10			LWGENE06794	BKGENE00698	BMGENE05839	HAGENE05009	JHGENE13136	LAGENE06642	MSGENE03144	PIGENE19807	RCGENE20065	TPGENE19723	\	\	SMIM23	585290903	Smim23	268370259	SMIM23	528997837	\	Uncharacterized protein C5orf50 OS=Homo sapiens GN=C5orf50 PE=2 SV=2	G1LX70_AILME Uncharacterized protein OS=Ailuropoda melanoleuca GN=C5orf50 PE=4 SV=1	IPR027880:Protein of unknown function DUF4635	\
MSGENE03600	10			LWGENE15683	BKGENE05966	BMGENE19061	HAGENE15282	JHGENE04810	LAGENE03628	MSGENE03600	PIGENE05682	RCGENE01096	TPGENE15736	OSGIN2	194037082	OSGIN1	33695101	Osgin1	568957595	OSGIN1	116004479	\	Oxidative stress-induced growth inhibitor 1 OS=Homo sapiens GN=OSGIN1 PE=2 SV=3	Q2KIN7_BOVIN Oxidative stress induced growth inhibitor 1 OS=Bos taurus GN=OSGIN1 PE=2 SV=1	\	GO:0008083:oxidative stress-induced growth inhibitor 1;GO:0030308:oxidative stress-induced growth inhibitor 1;
MSGENE03892	1			\	\	\	\	\	\	MSGENE03892	\	\	\	\	\	FRMD3	350276220	2310002L09Rik	239937495	FRMD3	114052346	\	FERM domain-containing protein 3 OS=Homo sapiens GN=FRMD3 PE=2 SV=1	I3N8G9_SPETR Uncharacterized protein OS=Spermophilus tridecemlineatus PE=4 SV=1	\	GO:0005737:ferm domain-containing protein 3 isoform 5;GO:0005856:ferm domain-containing protein 3 isoform 5;GO:0008092:ferm domain-containing protein 3 isoform 5;GO:0016021:ferm domain-containing protein 3 isoform 5;GO:0019898:ferm domain-containing protein 3 isoform 5;
MSGENE06732	10			LWGENE12439	BKGENE09799	BMGENE17791	HAGENE04439	JHGENE04498	LAGENE06116	MSGENE06732	PIGENE04652	RCGENE02295	TPGENE04341	LOC100525472	545844007	SLMO1	38678528	Slmo1	569003781	SLMO1	741973030	\	Protein slowmo homolog 1 OS=Homo sapiens GN=SLMO1 PE=2 SV=1	G3TU67_LOXAF Uncharacterized protein OS=Loxodonta africana GN=LOC100654108 PE=4 SV=1	IPR006797:PRELI/MSF1	\
MSGENE06887	1			\	\	\	\	\	\	MSGENE06887	\	\	\	\	\	FAM192A	767990573	Fam192a	755526228	FAM192A	741958382	\	Protein FAM192A OS=Homo sapiens GN=FAM192A PE=1 SV=1	L5KWR4_PTEAL NEFA-interacting nuclear protein NIP30 OS=Pteropus alecto GN=PAL_GLEAN10011073 PE=4 SV=1	\	\
MSGENE06954	1			\	\	\	\	\	\	MSGENE06954	\	\	\	\	\	C17orf99	530411268	6030468B19Rik	568976414	\	\	\	Uncharacterized protein C17orf99 OS=Homo sapiens GN=C17orf99 PE=1 SV=2	F1P6Z5_CANFA Uncharacterized protein (Fragment) OS=Canis familiaris GN=C17orf99 PE=4 SV=2	\	\
MSGENE07591	10			LWGENE20080	BKGENE10789	BMGENE08050	HAGENE04549	JHGENE00237	LAGENE15399	MSGENE07591	PIGENE00775	RCGENE07080	TPGENE20361	\	\	HEATR4	333805659	Gm17673	568981326	HEATR4	741941047	\	HEAT repeat-containing protein 4 OS=Homo sapiens GN=HEATR4 PE=1 SV=2	J9P6I7_CANFA Uncharacterized protein OS=Canis familiaris GN=HEATR4 PE=4 SV=1	\	\
MSGENE08239	1			\	\	\	\	\	\	MSGENE08239	\	\	\	\	\	FAM221A	767945441	Fam221a	755516519	FAM221A	528946846	\	Protein FAM221A OS=Homo sapiens GN=FAM221A PE=2 SV=1	G1LQX9_AILME Uncharacterized protein (Fragment) OS=Ailuropoda melanoleuca GN=FAM221A PE=4 SV=1	IPR026755:Protein FAM221A	\
MSGENE09986	8			LWGENE16010	BKGENE14546	\	HAGENE14439	JHGENE08055	\	MSGENE09986	PIGENE13938	RCGENE18075	TPGENE17169	DMRTA1	311245699	DMRT3	11056048	Dmrt3	569007207	DMRT3	741935569	\	Doublesex- and mab-3-related transcription factor 3 OS=Homo sapiens GN=DMRT3 PE=1 SV=1	H0V6L1_CAVPO Uncharacterized protein OS=Cavia porcellus GN=Dmrt3 PE=4 SV=1	IPR001275:DM DNA-binding domain;IPR005173:DMRTA motif;IPR026607:DMRT/protein doublesex/protein male abnormal 3	GO:0003700:sequence-specific DNA binding transcription factor activity; Molecular Function;GO:0005634:nucleus; Cellular Component;GO:0006355:regulation of transcription, DNA-dependent; Biological Process;GO:0007548:doublesex- and mab-3-related transcription factor 3;GO:0043565:sequence-specific DNA binding; Molecular Function;
MSGENE10218	10			LWGENE20049	BKGENE20317	BMGENE20438	HAGENE20281	JHGENE20235	LAGENE19982	MSGENE10218	PIGENE20244	RCGENE12976	TPGENE03231	\	\	CNEP1R1	529250119	Cnep1r1	160333150	CNEP1R1	77735559	\	Nuclear envelope phosphatase-regulatory subunit 1 OS=Pongo abelii GN=CNEP1R1 PE=2 SV=1	C1C468_LITCT Transmembrane protein 188 OS=Lithobates catesbeiana GN=TM188 PE=4 SV=1	IPR019168:Transmembrane protein 188	GO:0005737:unnamed protein product [Mus musculus];GO:0010867:unnamed protein product [Mus musculus];GO:0016021:unnamed protein product [Mus musculus];GO:0031965:unnamed protein product [Mus musculus];GO:0034504:unnamed protein product [Mus musculus];GO:0035307:unnamed protein product [Mus musculus];GO:0071595:unnamed protein product [Mus musculus];
MSGENE10745	10			LWGENE10812	BKGENE04203	BMGENE14557	HAGENE10588	JHGENE07499	LAGENE19010	MSGENE10745	PIGENE00441	RCGENE09098	TPGENE05625	\	\	\	\	Oosp3	111185934	\	\	\	Oocyte-secreted protein 1 OS=Mus musculus GN=Oosp1 PE=2 SV=1	L5KQ93_PTEAL Transcobalamin-1 OS=Pteropus alecto GN=PAL_GLEAN10011545 PE=4 SV=1	\	\
MSGENE12953	1			\	\	\	\	\	\	MSGENE12953	\	\	\	\	\	\	\	\	\	LOC100295719	297473963	\	T-cell receptor gamma chain V region PT-gamma-1/2 OS=Homo sapiens GN=TRGV3 PE=2 SV=1	L8I6N9_BOSMU Uncharacterized protein (Fragment) OS=Bos grunniens mutus GN=M91_19644 PE=4 SV=1	IPR013106:Immunoglobulin V-set domain	\
MSGENE14199	10			LWGENE19244	BKGENE13248	BMGENE16097	HAGENE12827	JHGENE09785	LAGENE14176	MSGENE14199	PIGENE13127	RCGENE13118	TPGENE19556	LMF1	545815396	LMF1	115511024	Lmf1	254939582	LMF1	115497048	\	Lipase maturation factor 1 OS=Bos taurus GN=LMF1 PE=2 SV=1	F6Z6S9_HORSE Uncharacterized protein (Fragment) OS=Equus caballus GN=LMF1 PE=4 SV=1	IPR009613:Lipase maturation factor	\
MSGENE15498	1			\	\	\	\	\	\	MSGENE15498	\	\	\	LOC100513894	545881744	PPDPF	13236524	Ppdpf	568920403	PPDPF	741947884	\	Pancreatic progenitor cell differentiation and proliferation factor OS=Bos taurus GN=PPDPF PE=3 SV=1	M3VH95_PIG Pancreatic progenitor cell differentiation and proliferation factor homolog OS=Sus scrofa GN=PPDPF PE=4 SV=1	IPR026754:Pancreatic progenitor cell differentiation and proliferation factor	GO:0007275:multicellular organismal development; Biological Process;GO:0030154:cell differentiation; Biological Process;
MSGENE16972	1			\	\	\	\	\	\	MSGENE16972	\	\	\	\	\	C14orf180	56605684	A530016L24Rik	568979878	C21H14orf180	329665052	\	Transmembrane protein C14orf180 homolog OS=Bos taurus PE=2 SV=2	G5E5T8_BOVIN Uncharacterized protein OS=Bos taurus GN=C21H14orf180 PE=4 SV=1	IPR028114:Protein of unknown function DUF4658	GO:0016021:transmembrane protein c14orf180 homolog;
MSGENE17174	10			LWGENE05273	BKGENE07362	BMGENE04238	HAGENE16444	JHGENE16954	LAGENE17158	MSGENE17174	PIGENE16664	RCGENE02387	TPGENE09141	LOC100623116	545890092	FAM60A	768044403	Fam60a	568944511	FAM60A	528950218	\	Protein FAM60A OS=Homo sapiens GN=FAM60A PE=1 SV=1	B7Z287_HUMAN cDNA FLJ55197, highly similar to Protein FAM60A OS=Homo sapiens PE=2 SV=1	IPR026065:FAM60A	GO:0016580:unnamed protein product [Homo sapiens];GO:0030336:unnamed protein product [Homo sapiens];
MSGENE18478	1			\	\	\	\	\	\	MSGENE18478	\	\	\	\	\	C1orf146	767904302	1700028K03Rik	270483710	C3H1orf146	528943675	\	Uncharacterized protein C1orf146 homolog OS=Bos taurus PE=2 SV=1	M3XYS1_MUSPF Uncharacterized protein OS=Mustela putorius furo GN=C1orf146 PE=4 SV=1	IPR027857:Protein of unknown function DUF4580	\
MSGENE18788	1			\	\	\	\	\	\	MSGENE18788	\	\	\	NLRC5	523580072	NLRC5	767990673	Nlrc5	568957137	NLRC5	528991054	\	Protein NLRC5 OS=Homo sapiens GN=NLRC5 PE=1 SV=3	K9IVK0_PIG Protein NLRC5 OS=Sus scrofa GN=NLRC5 PE=2 SV=1	\	\
MSGENE18796	1			\	\	\	\	\	\	MSGENE18796	\	\	\	\	\	BEND5	187828564	Bend5	568929586	BEND5	300193071	\	BEN domain-containing protein 5 OS=Homo sapiens GN=BEND5 PE=1 SV=1	I3M8X2_SPETR Uncharacterized protein OS=Spermophilus tridecemlineatus GN=BEND5 PE=4 SV=1	\	GO:0005794:chromosome 1 open reading frame isoform cra_b;
MSGENE18843	10			LWGENE12160	BKGENE08751	BMGENE16977	HAGENE03608	JHGENE03673	LAGENE03447	MSGENE18843	PIGENE02834	RCGENE07547	TPGENE00651	\	\	NCDN	62526029	Ncdn	755508249	NCDN	741921696	\	Neurochondrin OS=Bos taurus GN=NCDN PE=2 SV=1	F6Q1Q6_HORSE Uncharacterized protein OS=Equus caballus GN=NCDN PE=4 SV=1	IPR008709:Neurochondrin	GO:0031175:PREDICTED: neurochondrin-like [Equus caballus];GO:0043005:PREDICTED: neurochondrin-like [Equus caballus];GO:0045453:PREDICTED: neurochondrin-like [Equus caballus];
MSGENE19043	1			\	\	\	\	\	\	MSGENE19043	\	\	\	MYOCD	55741488	MYOCD	23957692	Myocd	154240726	MYOCD	741963199	\	Myocardin OS=Sus scrofa GN=MYOCD PE=2 SV=1	G1TR96_RABIT Uncharacterized protein (Fragment) OS=Oryctolagus cuniculus GN=MYOCD PE=4 SV=1	\	GO:0003676:mycd_pig ame: full=myocardin;GO:0005634:mycd_pig ame: full=myocardin;GO:0006355:mycd_pig ame: full=myocardin;GO:0035065:mycd_pig ame: full=myocardin;
MSGENE19242	1			\	\	\	\	\	\	MSGENE19242	\	\	\	LOC100518411	545805763	ANO2	767971377	Ano2	568941857	ANO2	741928089	\	Anoctamin-2 OS=Mus musculus GN=Ano2 PE=1 SV=2	G3GUL3_CRIGR von Willebrand factor OS=Cricetulus griseus GN=I79_001376 PE=4 SV=1	\	\
MSGENE19706	1			\	\	\	\	\	\	MSGENE19706	\	\	\	\	\	WDR44	45238858	Wdr44	793423751	WDR44	27807499	\	WD repeat-containing protein 44 OS=Bos taurus GN=WDR44 PE=1 SV=1	M3TYU5_PIG WD repeat-containing protein 44 isoform 1 OS=Sus scrofa GN=WDR44 PE=2 SV=1	IPR001680:WD40 repeat;IPR017986:WD40-repeat-containing domain	GO:0005515:protein binding; Molecular Function;GO:0005794:tpa: wd repeat-containing protein 44;GO:0005829:tpa: wd repeat-containing protein 44;GO:0010008:tpa: wd repeat-containing protein 44;GO:0048471:tpa: wd repeat-containing protein 44;
MSGENE20251	8			LWGENE19040	BKGENE09199	BMGENE19965	HAGENE10621	\	LAGENE18775	MSGENE20251	PIGENE08186	\	TPGENE11858	GIMAP2	350595112	GIMAP5	28416949	Gimap5	568942094	GIMAP5	528947554	\	GTPase IMAP family member 5 OS=Homo sapiens GN=GIMAP5 PE=2 SV=1	L7N067_CANFA Uncharacterized protein OS=Canis familiaris PE=4 SV=1	IPR006703:AIG1	GO:0005525:GTP binding; Molecular Function;
MSGENE20514	1			\	\	\	\	\	\	MSGENE20514	\	\	\	\	\	\	\	Cebpzos	569001467	\	\	\	\	F1S4Q7_PIG Uncharacterized protein OS=Sus scrofa GN=LOC100522251 PE=4 SV=1	\	\
PIGENE00218	1			\	\	\	\	\	\	\	PIGENE00218	\	\	\	\	C17orf99	530411268	6030468B19Rik	568976414	\	\	\	Uncharacterized protein C17orf99 OS=Homo sapiens GN=C17orf99 PE=1 SV=2	G9KS32_MUSPF Synaptogyrin 2 (Fragment) OS=Mustela putorius furo PE=2 SV=1	\	\
PIGENE01084	1			\	\	\	\	\	\	\	PIGENE01084	\	\	\	\	FAAP20	544063491	2610002J02Rik	568931777	C16H1orf86	262118275	\	Fanconi anemia-associated protein of 20 kDa OS=Bos taurus GN=FAAP20 PE=2 SV=2	F6ZY17_HORSE Uncharacterized protein (Fragment) OS=Equus caballus GN=C1orf86 PE=4 SV=1	\	GO:0019985:fanconi anemia-associated protein of 20 kda;GO:0036297:fanconi anemia-associated protein of 20 kda;GO:0043240:fanconi anemia-associated protein of 20 kda;GO:0044427:fanconi anemia-associated protein of 20 kda;GO:0070530:fanconi anemia-associated protein of 20 kda;
PIGENE02635	1			\	\	\	\	\	\	\	PIGENE02635	\	\	DEPDC1B	545877648	DEPDC1	38488716	Depdc1a	285401940	DEPDC1	194665711	\	DEP domain-containing protein 1A OS=Homo sapiens GN=DEPDC1 PE=1 SV=2	E1BA57_BOVIN Uncharacterized protein OS=Bos taurus GN=DEPDC1 PE=4 SV=2	IPR000198:Rho GTPase-activating protein domain;IPR000591:DEP domain	GO:0007165:signal transduction; Biological Process;GO:0035556:intracellular signal transduction; Biological Process;
PIGENE02984	10			LWGENE15909	BKGENE17831	BMGENE00832	HAGENE06845	JHGENE03817	LAGENE18325	MSGENE00689	PIGENE02984	RCGENE01350	TPGENE00196	LOC100622765	335298982	RTP4	54607029	Rtp4	568996089	RTP4	115495043	\	Receptor-transporting protein 4 OS=Homo sapiens GN=RTP4 PE=2 SV=3	A7L831_SHEEP Receptor transporter protein-4 OS=Ovis aries GN=RTP4 PE=2 SV=1	IPR026096:Receptor-transporting protein/CXXC-type zinc finger protein 11;IPR026690:Receptor-transporting protein 4;IPR027377:Zinc-binding domain	\
PIGENE03739	10			LWGENE02444	BKGENE11208	BMGENE12309	HAGENE00078	JHGENE19773	LAGENE16450	MSGENE06363	PIGENE03739	RCGENE16949	TPGENE19461	\	\	TRIQK	767952863	Triqk	284795346	TRIQK	741950870	\	Triple QxxK/R motif-containing protein OS=Danio rerio GN=triqk PE=2 SV=1	H0ZNN4_TAEGU Uncharacterized protein OS=Taeniopygia guttata GN=TRIQK PE=4 SV=1	IPR024842:Triple repetitive-sequence of QXXK/R protein	GO:0005789:endoplasmic reticulum membrane; Cellular Component;
PIGENE03750	1			\	\	\	\	\	\	\	PIGENE03750	\	\	\	\	FRMD3	350276220	2310002L09Rik	239937495	FRMD3	114052346	\	FERM domain-containing protein 3 OS=Homo sapiens GN=FRMD3 PE=2 SV=1	I3N8G9_SPETR Uncharacterized protein OS=Spermophilus tridecemlineatus PE=4 SV=1	\	GO:0005737:ferm domain-containing protein 3 isoform 5;GO:0005856:ferm domain-containing protein 3 isoform 5;GO:0008092:ferm domain-containing protein 3 isoform 5;GO:0016021:ferm domain-containing protein 3 isoform 5;GO:0019898:ferm domain-containing protein 3 isoform 5;
PIGENE04258	9			LWGENE06433	BKGENE18091	BMGENE17668	HAGENE03793	JHGENE19657	LAGENE18241	MSGENE20324	PIGENE04258	RCGENE05551	\	LOC100626952	545854201	CCDC7	767960536	Ccdc7	755527359	CCDC7	741947106	\	Coiled-coil domain-containing protein 7 OS=Homo sapiens GN=CCDC7 PE=2 SV=2	E1BDB4_BOVIN Uncharacterized protein OS=Bos taurus GN=CCDC7 PE=4 SV=1	\	\
PIGENE04316	1			\	\	\	\	\	\	\	PIGENE04316	\	\	DLC1	545878672	DLC1	256017150	Dlc1	755525051	\	\	\	Rho GTPase-activating protein 7 OS=Homo sapiens GN=DLC1 PE=1 SV=4	F6UE79_MACMU Uncharacterized protein OS=Macaca mulatta GN=DLC1 PE=2 SV=1	\	GO:0005622:rho gtpase-activating protein 7 isoform 1;GO:0007165:rho gtpase-activating protein 7 isoform 1;
PIGENE09062	1			\	\	\	\	\	\	\	PIGENE09062	\	\	\	\	NECAB1	767953410	Necab1	227330602	NECAB3	528973741	\	N-terminal EF-hand calcium-binding protein 1 OS=Pongo abelii GN=NECAB1 PE=2 SV=1	L5JT19_PTEAL N-terminal EF-hand calcium-binding protein 1 OS=Pteropus alecto GN=PAL_GLEAN10019481 PE=4 SV=1	IPR007138:Antibiotic biosynthesis monooxygenase	\
PIGENE11100	1			\	\	\	\	\	\	\	PIGENE11100	\	\	CALHM1	545893733	CALHM3	193211395	Calhm1	124486909	LOC786442	358411860	\	Calcium homeostasis modulator protein 3 OS=Homo sapiens GN=CALHM3 PE=2 SV=1	L5K2L2_PTEAL Calcium homeostasis modulator protein 3 OS=Pteropus alecto GN=PAL_GLEAN10014229 PE=4 SV=1	\	\
PIGENE12517	9			LWGENE13261	BKGENE09159	BMGENE01105	HAGENE18905	JHGENE18667	LAGENE16555	\	PIGENE12517	RCGENE07638	TPGENE07394	ZNF292	311244141	ZNF654	112734859	Zfp654	755554062	ZNF654	528936027	\	Zinc finger protein 654 OS=Homo sapiens GN=ZNF654 PE=1 SV=3	L5JML4_PTEAL Zinc finger protein 654 OS=Pteropus alecto GN=PAL_GLEAN10016393 PE=4 SV=1	IPR007087:Zinc finger, C2H2;IPR015880:Zinc finger, C2H2-like	GO:0046872:metal ion binding; Molecular Function;
PIGENE15338	1			\	\	\	\	\	\	\	PIGENE15338	\	\	\	\	SCAPER	767984364	Scaper	755530150	SCAPER	741898304	\	S phase cyclin A-associated protein in the endoplasmic reticulum OS=Homo sapiens GN=SCAPER PE=1 SV=1	F6UTC6_HORSE Uncharacterized protein (Fragment) OS=Equus caballus GN=SCAPER PE=4 SV=1	\	GO:0005634:hypothetical protein [Homo sapiens];GO:0005783:hypothetical protein [Homo sapiens];GO:0008270:hypothetical protein [Homo sapiens];GO:0046872:hypothetical protein [Homo sapiens];
PIGENE15714	10			LWGENE10822	BKGENE04578	BMGENE10437	HAGENE03776	JHGENE16591	LAGENE16168	MSGENE17062	PIGENE15714	RCGENE19033	TPGENE19786	ZMYM4	545892440	ZMYM3	768038319	Zmym3	569010395	ZMYM3	529014997	\	Zinc finger MYM-type protein 3 OS=Homo sapiens GN=ZMYM3 PE=1 SV=2	G7NRV5_MACMU Putative uncharacterized protein OS=Macaca mulatta GN=EGK_20624 PE=2 SV=1	IPR010507:Zinc finger, MYM-type;IPR011017:TRASH domain;IPR021893:Protein of unknown function DUF3504	GO:0007010:hypothetical protein EGK_20624 [Macaca mulatta];GO:0008270:zinc ion binding; Molecular Function;GO:0022604:hypothetical protein EGK_20624 [Macaca mulatta];
PIGENE17109	1			\	\	\	\	\	\	\	PIGENE17109	\	\	\	\	C14orf180	56605684	A530016L24Rik	568979878	C21H14orf180	329665052	\	Transmembrane protein C14orf180 homolog OS=Bos taurus PE=2 SV=2	G5E5T8_BOVIN Uncharacterized protein OS=Bos taurus GN=C21H14orf180 PE=4 SV=1	IPR028114:Protein of unknown function DUF4658	GO:0016021:transmembrane protein c14orf180 homolog;
PIGENE17882	1			\	\	\	\	\	\	\	PIGENE17882	\	\	\	\	TOM1	209180450	Tom1	568956483	TOM1	78042494	\	Target of Myb protein 1 OS=Mus musculus GN=Tom1 PE=1 SV=1	M3W035_FELCA Uncharacterized protein OS=Felis catus GN=TOM1 PE=4 SV=1	\	\
PIGENE19384	10			LWGENE02536	BKGENE18797	BMGENE08865	HAGENE04303	JHGENE17051	LAGENE16702	MSGENE03900	PIGENE19384	RCGENE19753	TPGENE16158	\	\	TMEM164	768038230	Tmem164	569011855	TMEM164	741982209	\	Transmembrane protein 164 OS=Bos taurus GN=TMEM164 PE=2 SV=1	M3X1I3_FELCA Uncharacterized protein OS=Felis catus GN=TMEM164 PE=4 SV=1	IPR026508:Transmembrane protein 164	\
PIGENE20704	1			\	\	\	\	\	\	\	PIGENE20704	\	\	\	\	\	\	Cebpzos	569001467	\	\	\	\	F1S4Q7_PIG Uncharacterized protein OS=Sus scrofa GN=LOC100522251 PE=4 SV=1	\	\
RCGENE01437	10			LWGENE12012	BKGENE06865	BMGENE17413	HAGENE15360	JHGENE16701	LAGENE14230	MSGENE09769	PIGENE15730	RCGENE01437	TPGENE08604	LOC100512195	545873280	SUB1	767934186	Sub1	6755364	SUB1	157427940	\	Activated RNA polymerase II transcriptional coactivator p15 OS=Pongo abelii GN=SUB1 PE=2 SV=1	G1LI31_AILME Uncharacterized protein (Fragment) OS=Ailuropoda melanoleuca GN=SUB1 PE=4 SV=1	IPR003173:Transcriptional coactivator p15 (PC4)	GO:0003677:DNA binding; Molecular Function;GO:0003713:transcription coactivator activity; Molecular Function;GO:0006355:regulation of transcription, DNA-dependent; Biological Process;
RCGENE01605	1			\	\	\	\	\	\	\	\	RCGENE01605	\	\	\	FRMD3	350276220	2310002L09Rik	239937495	FRMD3	114052346	\	FERM domain-containing protein 3 OS=Homo sapiens GN=FRMD3 PE=2 SV=1	I3N8G9_SPETR Uncharacterized protein OS=Spermophilus tridecemlineatus PE=4 SV=1	\	GO:0005737:ferm domain-containing protein 3 isoform 5;GO:0005856:ferm domain-containing protein 3 isoform 5;GO:0008092:ferm domain-containing protein 3 isoform 5;GO:0016021:ferm domain-containing protein 3 isoform 5;GO:0019898:ferm domain-containing protein 3 isoform 5;
RCGENE01654	10			LWGENE17756	BKGENE18132	BMGENE13668	HAGENE12588	JHGENE03742	LAGENE11417	MSGENE10399	PIGENE00269	RCGENE01654	TPGENE16863	\	\	KIAA0195	767996626	2310067B10Rik	568975931	KIAA0195	528997538	\	Uncharacterized protein KIAA0195 OS=Homo sapiens GN=KIAA0195 PE=1 SV=1	F6YI77_HORSE Uncharacterized protein (Fragment) OS=Equus caballus GN=KIAA0195 PE=4 SV=1	\	\
RCGENE02015	10			LWGENE08366	BKGENE09490	BMGENE02175	HAGENE19104	JHGENE04428	LAGENE02435	MSGENE04294	PIGENE01579	RCGENE02015	TPGENE04388	FAM173A	311251729	FAM173B	154240720	Fam173b	21312640	FAM173B	76646682	\	Protein FAM173B OS=Homo sapiens GN=FAM173B PE=2 SV=2	F7GKC5_MACMU Uncharacterized protein OS=Macaca mulatta GN=FAM173B PE=2 SV=1	IPR026170:FAM173 family	\
RCGENE02182	8			LWGENE15526	BKGENE14045	BMGENE01568	\	JHGENE12143	\	MSGENE10871	PIGENE19805	RCGENE02182	TPGENE06333	\	\	PCP4	48762918	Pcp4	6679227	PCP4	118151340	\	Purkinje cell protein 4 OS=Homo sapiens GN=PCP4 PE=1 SV=3	M3YB87_MUSPF Uncharacterized protein OS=Mustela putorius furo GN=Pcp4 PE=4 SV=1	\	GO:0005516:purkinje cell protein 4;GO:0005634:purkinje cell protein 4;GO:0005829:purkinje cell protein 4;GO:0007417:purkinje cell protein 4;
RCGENE02848	10			LWGENE13377	BKGENE06132	BMGENE06995	HAGENE04495	JHGENE19321	LAGENE08990	MSGENE19084	PIGENE17946	RCGENE02848	TPGENE18899	NIPAL1	335307736	NIPA2	57164953	Nipa2	568948779	NIPA2	77735549	\	Magnesium transporter NIPA2 OS=Pongo abelii GN=NIPA2 PE=2 SV=1	M3V808_PIG Non imprinted in Prader-Willi/Angelman syndrome 2 tv1 OS=Sus scrofa GN=NIPA2 PE=2 SV=1	IPR008521:Magnesium transporter NIPA	GO:0005769:magnesium transporter nipa2 isoform b;GO:0005886:magnesium transporter nipa2 isoform b;GO:0015095:magnesium ion transmembrane transporter activity; Molecular Function;GO:0015693:magnesium ion transport; Biological Process;GO:0016020:membrane; Cellular Component;GO:0016021:magnesium transporter nipa2 isoform b;
RCGENE05916	10			LWGENE19411	BKGENE16384	BMGENE20393	HAGENE01237	JHGENE06972	LAGENE19189	MSGENE12086	PIGENE02780	RCGENE05916	TPGENE02394	FAM154B	545840425	SAXO1	767954546	Saxo1	124487360	SAXO1	115495763	\	Protein FAM154A OS=Homo sapiens GN=FAM154A PE=1 SV=2	F7BHF5_HORSE Uncharacterized protein OS=Equus caballus GN=FAM154A PE=4 SV=1	IPR024963:STOP/FAM154	\
RCGENE06005	10			LWGENE05501	BKGENE09531	BMGENE12059	HAGENE07959	JHGENE09709	LAGENE16239	MSGENE19534	PIGENE08383	RCGENE06005	TPGENE19114	C17H20orf112	545880143	NOL4	767999438	Nol4	238814393	NOL4	281485571	\	Nucleolar protein 4 OS=Mus musculus GN=Nol4 PE=2 SV=2	I3MVM4_SPETR Uncharacterized protein (Fragment) OS=Spermophilus tridecemlineatus PE=4 SV=1	IPR026747:Nucleolar protein 4	GO:0005730:nucleolus; Cellular Component;
RCGENE08282	8			LWGENE17497	BKGENE08274	BMGENE18721	\	JHGENE20315	\	MSGENE20373	PIGENE13222	RCGENE08282	TPGENE06158	NKAIN1	335290874	NKAIN4	226529429	Nkain4	213513225	NKAIN3	741950143	\	Sodium/potassium-transporting ATPase subunit beta-1-interacting protein 4 OS=Homo sapiens GN=NKAIN4 PE=2 SV=2	E2RGG5_CANFA Uncharacterized protein OS=Canis familiaris GN=NKAIN4 PE=4 SV=2	IPR008516:Na,K-Atpase Interacting protein	\
RCGENE09740	10			LWGENE14224	BKGENE07836	BMGENE06953	HAGENE16900	JHGENE17695	LAGENE06860	MSGENE00194	PIGENE04343	RCGENE09740	TPGENE14652	TM6SF1	194039568	TM6SF2	112181177	Tm6sf2	658132454	TM6SF2	300793917	\	Transmembrane 6 superfamily member 2 OS=Homo sapiens GN=TM6SF2 PE=2 SV=3	E1BAW0_BOVIN Uncharacterized protein OS=Bos taurus GN=TM6SF2 PE=4 SV=1	IPR016964:Transmembrane protein 6/97	\
RCGENE10855	1			\	\	\	\	\	\	\	\	RCGENE10855	\	\	\	CCDC134	530420388	Ccdc134	116268089	CCDC134	329663339	\	Coiled-coil domain-containing protein 134 OS=Rattus norvegicus GN=Ccdc134 PE=2 SV=1	M3WKF7_FELCA Uncharacterized protein OS=Felis catus GN=CCDC134 PE=4 SV=1	IPR026321:Coiled-coil domain-containing protein 134	\
RCGENE11059	10			LWGENE08012	BKGENE11403	BMGENE20106	HAGENE10150	JHGENE10245	LAGENE13125	MSGENE10598	PIGENE10174	RCGENE11059	TPGENE07237	\	\	NAT14	23943862	Nat14	568945848	NAT14	82524357	\	N-acetyltransferase 14 OS=Bos taurus GN=NAT14 PE=2 SV=1	M3X8Y4_FELCA Uncharacterized protein OS=Felis catus GN=NAT14 PE=4 SV=1	IPR000182:GNAT domain	GO:0003677:n-acetyltransferase 14;GO:0006355:n-acetyltransferase 14;GO:0008080:N-acetyltransferase activity; Molecular Function;GO:0016021:n-acetyltransferase 14;
RCGENE11243	1			\	\	\	\	\	\	\	\	RCGENE11243	\	\	\	C14orf180	56605684	A530016L24Rik	568979878	C21H14orf180	329665052	\	Transmembrane protein C14orf180 homolog OS=Bos taurus PE=2 SV=2	G5E5T8_BOVIN Uncharacterized protein OS=Bos taurus GN=C21H14orf180 PE=4 SV=1	IPR028114:Protein of unknown function DUF4658	GO:0016021:transmembrane protein c14orf180 homolog;
RCGENE11686	10			LWGENE00840	BKGENE08842	BMGENE01675	HAGENE14964	JHGENE00080	LAGENE10157	MSGENE16489	PIGENE08072	RCGENE11686	TPGENE18721	\	\	SAPCD1	89001111	Sapcd1	254939597	SAPCD1	126723451	\	Suppressor APC domain-containing protein 1 OS=Homo sapiens GN=SAPCD1 PE=2 SV=2	A2VE16_BOVIN MGC151586 protein OS=Bos taurus GN=MGC151586 PE=2 SV=1	IPR026828:Suppressor APC domain-containing protein 1/2;IPR026831:Adenomatous polyposis coli domain	\
RCGENE12270	10			LWGENE14116	BKGENE19314	BMGENE03460	HAGENE06675	JHGENE13889	LAGENE13033	MSGENE11374	PIGENE11767	RCGENE12270	TPGENE20085	LOC100525089	545879729	C20orf27	385862238	1700037H04Rik	755500421	C13H20orf27	741948017	\	UPF0687 protein C20orf27 OS=Homo sapiens GN=C20orf27 PE=1 SV=3	M3X3E2_FELCA Uncharacterized protein OS=Felis catus GN=C20orf27 PE=4 SV=1	IPR026794:Uncharacterised protein family UPF0687	\
RCGENE12375	10			LWGENE20092	BKGENE20284	BMGENE19465	HAGENE02309	JHGENE06806	LAGENE17892	MSGENE12131	PIGENE02900	RCGENE12375	TPGENE14875	\	\	HDX	768037368	Hdx	123703979	LOC523251	741908108	\	Highly divergent homeobox OS=Homo sapiens GN=HDX PE=1 SV=1	F6Q6Z8_HORSE Uncharacterized protein OS=Equus caballus GN=HDX PE=3 SV=1	\	GO:0003700:highly divergent homeobox;GO:0005634:highly divergent homeobox;GO:0006355:highly divergent homeobox;GO:0043565:highly divergent homeobox;
RCGENE12888	10			LWGENE01275	BKGENE16922	BMGENE13852	HAGENE14885	JHGENE09171	LAGENE02450	MSGENE13903	PIGENE04905	RCGENE12888	TPGENE03218	\	\	C9orf69	374671827	C330006A16Rik	374671816	C11H9orf69	528970451	\	Protein C9orf69 OS=Homo sapiens GN=C9orf69 PE=1 SV=2	M3X3M8_FELCA Uncharacterized protein OS=Felis catus GN=C9orf69 PE=4 SV=1	IPR000038:Cell division protein GTP binding	GO:0005525:GTP binding; Molecular Function;GO:0007049:cell cycle; Biological Process;
RCGENE13174	10			LWGENE16876	BKGENE12783	BMGENE12478	HAGENE09248	JHGENE06023	LAGENE18086	MSGENE11992	PIGENE19964	RCGENE13174	TPGENE10968	CNIH4	545852198	CNIH4	7661824	Cnih4	68131553	CNIH4	77735629	\	Protein cornichon homolog 4 OS=Mus musculus GN=Cnih4 PE=2 SV=1	G3VXE6_SARHA Uncharacterized protein OS=Sarcophilus harrisii GN=CNIH4 PE=4 SV=1	IPR003377:Cornichon	GO:0005783:protein cornichon homolog 4-like;GO:0016020:membrane; Cellular Component;GO:0035556:intracellular signal transduction; Biological Process;
RCGENE15127	9			LWGENE12716	BKGENE11853	BMGENE13809	HAGENE07405	JHGENE11019	LAGENE12081	MSGENE13728	PIGENE13685	RCGENE15127	\	\	\	WDPCP	767914643	Wdpcp	568970130	WDPCP	332164755	\	WD repeat-containing and planar cell polarity effector protein fritz homolog OS=Homo sapiens GN=WDPCP PE=1 SV=2	H7C375_HUMAN WD repeat-containing and planar cell polarity effector protein fritz homolog (Fragment) OS=Homo sapiens GN=WDPCP PE=4 SV=1	IPR024511:Protein of unknown function DUF3312	\
RCGENE16188	10			LWGENE13967	BKGENE05147	BMGENE15533	HAGENE14754	JHGENE16110	LAGENE15747	MSGENE16331	PIGENE01126	RCGENE16188	TPGENE15821	CAMTA2	545859936	CAMTA1	767903345	Camta1	307344708	LOC100848595	741955062	\	Calmodulin-binding transcription activator 1 OS=Mus musculus GN=Camta1 PE=2 SV=1	G1RBK9_NOMLE Uncharacterized protein (Fragment) OS=Nomascus leucogenys PE=4 SV=2	\	\
RCGENE17093	10			LWGENE20040	BKGENE16285	BMGENE18037	HAGENE15791	JHGENE17435	LAGENE16815	MSGENE17553	PIGENE16295	RCGENE17093	TPGENE04510	\	\	LOC102724770	578839219	Dgcr6	577861077	DGCR6L	160333824	\	Protein DGCR6 OS=Homo sapiens GN=DGCR6 PE=1 SV=3	G1TYD8_RABIT Uncharacterized protein (Fragment) OS=Oryctolagus cuniculus PE=4 SV=1	IPR010849:DiGeorge syndrome critical 6	\
RCGENE18060	10			LWGENE20069	BKGENE20338	BMGENE20411	HAGENE20250	JHGENE20306	LAGENE20273	MSGENE20377	PIGENE20243	RCGENE18060	TPGENE20348	\	\	TMEM184C	190358512	Tmem184c	269973921	TMEM184C	115496346	\	Transmembrane protein 184C OS=Homo sapiens GN=TMEM184C PE=2 SV=2	M3WMJ7_FELCA Uncharacterized protein OS=Felis catus GN=TMEM184C PE=4 SV=1	IPR005178:Organic solute transporter Ost-alpha	\
RCGENE18166	1			\	\	\	\	\	\	\	\	RCGENE18166	\	\	\	HEATR3	41281996	Heatr3	40789301	HEATR3	741958407	\	HEAT repeat-containing protein 3 OS=Homo sapiens GN=HEATR3 PE=1 SV=2	L8I7A0_BOSMU HEAT repeat-containing protein 3 OS=Bos grunniens mutus GN=M91_19415 PE=4 SV=1	\	\
RCGENE18453	10			LWGENE05617	BKGENE15629	BMGENE05933	HAGENE14490	JHGENE14247	LAGENE05612	MSGENE15081	PIGENE11519	RCGENE18453	TPGENE09817	\	\	C17orf58	149944459	1810010H24Rik	755539534	C19H17orf58	359077093	\	UPF0450 protein C17orf58 OS=Homo sapiens GN=C17orf58 PE=2 SV=2	M3YTC4_MUSPF Uncharacterized protein OS=Mustela putorius furo GN=C17orf58 PE=4 SV=1	\	\
RCGENE19862	1			\	\	\	\	\	\	\	\	RCGENE19862	\	\	\	C17orf99	530411268	6030468B19Rik	568976414	\	\	\	Uncharacterized protein C17orf99 OS=Homo sapiens GN=C17orf99 PE=1 SV=2	F1P6Z5_CANFA Uncharacterized protein (Fragment) OS=Canis familiaris GN=C17orf99 PE=4 SV=2	\	\
RCGENE20003	4			LWGENE00706	\	BMGENE20375	\	JHGENE20148	\	\	\	RCGENE20003	\	LOC102165726	545811751	\	\	\	\	\	\	\	\	I3LF13_PIG Uncharacterized protein OS=Sus scrofa PE=4 SV=1	\	\
RCGENE20170	10			LWGENE20469	BKGENE20722	BMGENE20546	HAGENE20479	JHGENE20764	LAGENE20466	MSGENE20712	PIGENE20585	RCGENE20170	TPGENE13241	TMEM200A	545797940	TMEM200C	767997853	Tmem200c	331284197	TMEM200C	331284193	\	Transmembrane protein 200C OS=Homo sapiens GN=TMEM200C PE=2 SV=2	G3HT48_CRIGR Transmembrane protein TTMA OS=Cricetulus griseus GN=I79_014066 PE=4 SV=1	IPR018787:Protein of unknown function DUF2371, TMEM200	\
RCGENE20357	1			\	\	\	\	\	\	\	\	RCGENE20357	\	\	\	\	\	Cebpzos	569001467	\	\	\	\	F1S4Q7_PIG Uncharacterized protein OS=Sus scrofa GN=LOC100522251 PE=4 SV=1	\	\
RCGENE20527	1			\	\	\	\	\	\	\	\	RCGENE20527	\	ZG16	545890180	ZG16B	94536866	Sbpl	116812642	LOC104975830	741973898	\	Zymogen granule protein 16 homolog B OS=Homo sapiens GN=ZG16B PE=1 SV=3	L8J642_BOSMU Uncharacterized protein (Fragment) OS=Bos grunniens mutus GN=M91_18799 PE=4 SV=1	IPR001229:Mannose-binding lectin	\
TPGENE00115	1			\	\	\	\	\	\	\	\	\	TPGENE00115	\	\	KIAA0825	767935735	2210408I21Rik	224589075	KIAA0825	741934622	\	Uncharacterized protein KIAA0825 OS=Homo sapiens GN=KIAA0825 PE=2 SV=2	E2QZV9_CANFA Uncharacterized protein OS=Canis familiaris GN=KIAA0825 PE=4 SV=2	IPR027993:Protein of unknown function DUF4495	\
TPGENE00129	1			\	\	\	\	\	\	\	\	\	TPGENE00129	\	\	CFAP54	767893615	Cfap54	755482497	CFAP54	741926982	\	\	H2Q6N6_PANTR Uncharacterized protein OS=Pan troglodytes GN=LOC452148 PE=4 SV=1	\	\
TPGENE00655	10			LWGENE20468	BKGENE20555	BMGENE20832	HAGENE20435	JHGENE20397	LAGENE20376	MSGENE20818	PIGENE20411	RCGENE20301	TPGENE00655	\	\	C1orf216	767902372	5730409E04Rik	225543154	C3H1orf216	741922343	\	UPF0500 protein C1orf216 OS=Homo sapiens GN=C1orf216 PE=2 SV=1	L5JRK9_PTEAL Uncharacterized protein OS=Pteropus alecto GN=PAL_GLEAN10014962 PE=4 SV=1	IPR027812:Protein of unknown function DUF4653	\
TPGENE00880	10			LWGENE20470	BKGENE20544	BMGENE20870	HAGENE20631	JHGENE20668	LAGENE20396	MSGENE20676	PIGENE20735	RCGENE20307	TPGENE00880	\	\	MBLAC1	63025212	Mblac1	29244490	MBLAC1	115497922	\	Metallo-beta-lactamase domain-containing protein 1 OS=Bos taurus GN=MBLAC1 PE=2 SV=1	F1MBD2_BOVIN Metallo-beta-lactamase domain-containing protein 1 OS=Bos taurus GN=MBLAC1 PE=4 SV=1	IPR001279:Beta-lactamase-like	GO:0016787:hydrolase activity; Molecular Function;GO:0046872:metallo-beta-lactamase domain-containing protein 1;
TPGENE02142	1			\	\	\	\	\	\	\	\	\	TPGENE02142	\	\	\	\	\	\	\	\	\	\	J3QM55_MOUSE Protein tyrosine phosphatase type IVA 1 OS=Mus musculus GN=Ptp4a1 PE=4 SV=1	\	\
TPGENE02914	9			LWGENE20624	BKGENE20521	BMGENE20638	HAGENE20470	\	LAGENE20461	MSGENE20419	PIGENE20535	RCGENE20414	TPGENE02914	\	\	CFAP44	31377846	Cfap44	568994994	CFAP44	194663744	\	WD repeat-containing protein 52 OS=Homo sapiens GN=WDR52 PE=1 SV=1	F1MJU0_BOVIN Uncharacterized protein OS=Bos taurus GN=WDR52 PE=4 SV=2	\	\
TPGENE03215	9			LWGENE01278	BKGENE16925	BMGENE13855	HAGENE14888	JHGENE09173	LAGENE02453	MSGENE13905	\	RCGENE12891	TPGENE03215	\	\	MGC50722	767957437	4932418E24Rik	755497677	LOC787891	741944764	\	\	F1MDL7_BOVIN Uncharacterized protein (Fragment) OS=Bos taurus PE=4 SV=2	\	\
TPGENE03360	10			LWGENE20646	BKGENE20422	BMGENE20780	HAGENE20636	JHGENE20649	LAGENE20599	MSGENE20665	PIGENE20407	RCGENE20525	TPGENE03360	\	\	\	\	\	\	\	\	\	\	I3N5S2_SPETR Uncharacterized protein (Fragment) OS=Spermophilus tridecemlineatus PE=4 SV=1	\	\
TPGENE04060	10			LWGENE18866	BKGENE10500	BMGENE07686	HAGENE10975	JHGENE06770	LAGENE10049	MSGENE02766	PIGENE11155	RCGENE18920	TPGENE04060	\	\	JSRP1	21389423	Jsrp1	326807033	JSRP1	114053273	\	Junctional sarcoplasmic reticulum protein 1 OS=Bos taurus GN=JSRP1 PE=2 SV=1	F1MZL0_BOVIN Junctional sarcoplasmic reticulum protein 1 OS=Bos taurus GN=JSRP1 PE=4 SV=2	IPR026178:Junctional sarcoplasmic reticulum protein 1	GO:0003009:junctional sarcoplasmic reticulum protein 1;GO:0016529:junctional sarcoplasmic reticulum protein 1;GO:0044763:junctional sarcoplasmic reticulum protein 1;GO:0051179:junctional sarcoplasmic reticulum protein 1;
TPGENE04527	10			LWGENE06688	BKGENE16578	BMGENE07519	HAGENE16348	JHGENE08834	LAGENE00220	MSGENE07612	PIGENE13306	RCGENE17341	TPGENE04527	WDPCP	350582349	WDPCP	767914643	Wdpcp	568970130	WDPCP	332164755	\	WD repeat-containing and planar cell polarity effector protein fritz homolog OS=Homo sapiens GN=WDPCP PE=1 SV=2	L5KTW4_PTEAL Uncharacterized protein (Fragment) OS=Pteropus alecto GN=PAL_GLEAN10021210 PE=4 SV=1	IPR024511:Protein of unknown function DUF3312	\
TPGENE04774	10			LWGENE20331	BKGENE20734	BMGENE20474	HAGENE20765	JHGENE20582	LAGENE20386	MSGENE20432	PIGENE20517	RCGENE20118	TPGENE04774	TMEM81	350588712	TMEM81	42794618	Tmem81	21312826	TMEM81	115495953	\	Transmembrane protein 81 OS=Bos taurus GN=TMEM81 PE=2 SV=1	L5JVH9_PTEAL Transmembrane protein 81 OS=Pteropus alecto GN=PAL_GLEAN10006957 PE=4 SV=1	IPR007110:Immunoglobulin-like domain	GO:0005515:protein binding; Molecular Function;
TPGENE05201	10			LWGENE00479	BKGENE08383	BMGENE14603	HAGENE12857	JHGENE07627	LAGENE06092	MSGENE10442	PIGENE04844	RCGENE04369	TPGENE05201	\	\	BEND5	187828564	Bend5	30794456	BEND5	300193071	\	BEN domain-containing protein 5 OS=Homo sapiens GN=BEND5 PE=1 SV=1	M3VUZ5_FELCA Uncharacterized protein OS=Felis catus GN=BEND5 PE=4 SV=1	IPR018379:BEN domain	GO:0005794:ben domain-containing protein 5;
TPGENE05853	7			LWGENE20356	BKGENE20630	\	\	JHGENE20384	LAGENE20707	MSGENE20622	PIGENE20547	\	TPGENE05853	LOC100520401	311266470	CISD1	8923930	Cisd1	19527228	CISD1	77404223	\	CDGSH iron-sulfur domain-containing protein 1 OS=Bos taurus GN=CISD1 PE=1 SV=1	M3YG67_MUSPF Uncharacterized protein OS=Mustela putorius furo GN=Cisd1 PE=4 SV=1	IPR006622:Iron sulphur-containing domain, CDGSH-type, subfamily;IPR019610:Iron sulphur domain-containing, mitoNEET, N-terminal	GO:0005741:cdgsh iron-sulfur domain-containing protein 1;GO:0016021:cdgsh iron-sulfur domain-containing protein 1;GO:0043231:intracellular membrane-bounded organelle; Cellular Component;GO:0043457:cdgsh iron-sulfur domain-containing protein 1;GO:0046872:cdgsh iron-sulfur domain-containing protein 1;GO:0051537:2 iron, 2 sulfur cluster binding; Molecular Function;
TPGENE05985	10			LWGENE13460	BKGENE16017	BMGENE08306	HAGENE13721	JHGENE17159	LAGENE15311	MSGENE10036	PIGENE12172	RCGENE14569	TPGENE05985	HIGD1A	545861766	HIGD1C	157817101	Higd1c	51100970	HIGD1C	741926083	\	HIG1 domain family member 1C OS=Homo sapiens GN=HIGD1C PE=2 SV=2	G3MXZ2_BOVIN Uncharacterized protein OS=Bos taurus GN=100850557 PE=4 SV=1	IPR007667:Hypoxia induced protein, domain	\
TPGENE06152	10			LWGENE20601	BKGENE20547	BMGENE20861	HAGENE20388	JHGENE20746	LAGENE20457	MSGENE20744	PIGENE20638	RCGENE20318	TPGENE06152	\	\	C20orf195	768018286	BC051628	568920331	C13H20orf195	741948237	\	Uncharacterized protein C20orf195 homolog OS=Bos taurus PE=2 SV=1	L8HNY8_BOSMU Uncharacterized protein OS=Bos grunniens mutus GN=M91_04658 PE=4 SV=1	\	\
TPGENE06366	10			LWGENE17049	BKGENE07074	BMGENE02185	HAGENE17051	JHGENE04319	LAGENE01669	MSGENE19344	PIGENE11917	RCGENE08096	TPGENE06366	0610007P14RIK	264681428	C14orf1	6005719	0610007P14Rik	568980159	C10H14orf1	528967334	\	Probable ergosterol biosynthetic protein 28 OS=Mus musculus GN=ORF11 PE=2 SV=1	D0G0B2_PIG Putative uncharacterized protein OS=Sus scrofa GN=0610007P14Rik PE=2 SV=1	IPR005352:Erg28	GO:0016021:integral to membrane; Cellular Component;
TPGENE06875	1			\	\	\	\	\	\	\	\	\	TPGENE06875	\	\	\	\	Cebpzos	569001467	\	\	\	\	F1S4Q7_PIG Uncharacterized protein OS=Sus scrofa GN=LOC100522251 PE=4 SV=1	\	\
TPGENE07708	7			LWGENE16563	\	BMGENE15112	\	\	LAGENE07594	MSGENE05792	PIGENE07177	RCGENE07357	TPGENE07708	\	\	CMTM2	21389567	Cmtm2b	21729765	CMTM2	115495479	\	CKLF-like MARVEL transmembrane domain-containing protein 2 OS=Homo sapiens GN=CMTM2 PE=2 SV=1	L5KTD2_PTEAL CKLF-like MARVEL transmembrane domain-containing protein 2 OS=Pteropus alecto GN=PAL_GLEAN10016192 PE=4 SV=1	\	\
TPGENE08599	10			LWGENE02368	BKGENE17996	BMGENE09894	HAGENE16638	JHGENE08201	LAGENE00385	MSGENE01885	PIGENE16160	RCGENE10514	TPGENE08599	IRF2BPL	194038605	IRF2BP2	116734704	Irf2bp2	257196179	IRF2BP2	741978013	\	Interferon regulatory factor 2-binding protein 2 OS=Homo sapiens GN=IRF2BP2 PE=1 SV=2	M3XUP0_MUSPF Uncharacterized protein (Fragment) OS=Mustela putorius furo GN=Irf2bp2 PE=4 SV=1	IPR022750:Interferon regulatory factor 2-binding protein 1 &amp:2, zinc finger	GO:0005634:interferon regulatory factor 2-binding protein 2 isoform partial;
TPGENE09053	10			LWGENE20599	BKGENE20528	BMGENE20633	HAGENE20529	JHGENE20379	LAGENE20490	MSGENE20646	PIGENE20719	RCGENE20550	TPGENE09053	\	\	SMIM3	296317236	Smim3	755560335	SMIM3	346644759	\	Small integral membrane protein 3 OS=Homo sapiens GN=SMIM3 PE=2 SV=1	M3V832_PIG Small integral membrane protein 3 OS=Sus scrofa GN=SMIM3 PE=4 SV=1	\	\
TPGENE09567	6			LWGENE03801	\	BMGENE17411	\	JHGENE20198	\	MSGENE12895	\	RCGENE10389	TPGENE09567	SPATA16	295444929	SPATA16	190194384	Spata16	28077041	SPATA16	528937316	\	Spermatogenesis-associated protein 16 OS=Macaca fascicularis GN=SPATA16 PE=2 SV=1	D5K8A5_PIG Spermatogenesis associated 16 OS=Sus scrofa GN=SPATA16 PE=2 SV=1	\	\
TPGENE10261	10			LWGENE20186	BKGENE20450	BMGENE20700	HAGENE20738	JHGENE20457	LAGENE20676	MSGENE20556	PIGENE20426	RCGENE20192	TPGENE10261	\	\	TMPPE	210031196	Tmppe	317008614	TMPPE	741968148	\	Transmembrane protein with metallophosphoesterase domain OS=Homo sapiens GN=TMPPE PE=2 SV=2	G1PQ19_MYOLU Uncharacterized protein OS=Myotis lucifugus PE=4 SV=1	IPR004843:Phosphoesterase domain	GO:0016787:hydrolase activity; Molecular Function;
TPGENE10757	9			LWGENE05765	BKGENE08473	\	HAGENE03322	JHGENE06531	LAGENE09404	MSGENE15374	PIGENE17336	RCGENE16254	TPGENE10757	LOC100520401	311266470	CISD1	8923930	Cisd1	19527228	CISD1	77404223	\	CDGSH iron-sulfur domain-containing protein 1 OS=Bos taurus GN=CISD1 PE=1 SV=1	L8ILD8_BOSMU CDGSH iron-sulfur domain-containing protein 1 (Fragment) OS=Bos grunniens mutus GN=M91_11603 PE=4 SV=1	IPR006622:Iron sulphur-containing domain, CDGSH-type, subfamily;IPR018967:Iron sulphur-containing domain, CDGSH-type;IPR019610:Iron sulphur domain-containing, mitoNEET, N-terminal	GO:0005741:cdgsh iron-sulfur domain-containing protein 1;GO:0016021:cdgsh iron-sulfur domain-containing protein 1;GO:0043231:intracellular membrane-bounded organelle; Cellular Component;GO:0043457:cdgsh iron-sulfur domain-containing protein 1;GO:0046872:cdgsh iron-sulfur domain-containing protein 1;GO:0051537:2 iron, 2 sulfur cluster binding; Molecular Function;
TPGENE12050	1			\	\	\	\	\	\	\	\	\	TPGENE12050	\	\	C17orf99	530411268	6030468B19Rik	568976414	\	\	\	Uncharacterized protein C17orf99 OS=Homo sapiens GN=C17orf99 PE=1 SV=2	F1P6Z5_CANFA Uncharacterized protein (Fragment) OS=Canis familiaris GN=C17orf99 PE=4 SV=2	\	\
TPGENE13104	1			\	\	\	\	\	\	\	\	\	TPGENE13104	\	\	C14orf180	56605684	A530016L24Rik	568979878	C21H14orf180	329665052	\	Transmembrane protein C14orf180 homolog OS=Bos taurus PE=2 SV=2	G5E5T8_BOVIN Uncharacterized protein OS=Bos taurus GN=C21H14orf180 PE=4 SV=1	IPR028114:Protein of unknown function DUF4658	\
TPGENE13131	10			LWGENE17104	BKGENE01011	BMGENE18616	HAGENE06817	JHGENE02375	LAGENE09290	MSGENE08564	PIGENE09871	RCGENE06482	TPGENE13131	\	\	UVSSA	578808194	Uvssa	568934540	UVSSA	528953971	\	UV-stimulated scaffold protein A OS=Bos taurus GN=UVSSA PE=3 SV=2	L8ILH1_BOSMU Uncharacterized protein (Fragment) OS=Bos grunniens mutus GN=M91_07422 PE=4 SV=1	IPR018610:Protein of unknown function DUF2043	\
TPGENE13253	10			LWGENE20413	BKGENE01787	BMGENE17991	HAGENE06097	JHGENE20743	LAGENE00887	MSGENE20489	PIGENE20578	RCGENE06649	TPGENE13253	LOC100517674	311267290	KRTAP3-2	13994364	Krtap3-3	21536226	KRTAP3-3	116004425	\	Keratin-associated protein 3-2 OS=Mus musculus GN=Krtap3-2 PE=2 SV=2	G3IGG7_CRIGR Keratin-associated protein 3-2 OS=Cricetulus griseus GN=I79_022880 PE=4 SV=1	IPR007659:Keratin, high-sulphur matrix protein	GO:0005198:structural molecule activity; Molecular Function;GO:0045095:keratin filament; Cellular Component;
TPGENE13254	10			LWGENE20414	BKGENE20406	BMGENE20850	HAGENE20486	JHGENE20744	LAGENE20323	MSGENE20490	PIGENE20579	RCGENE20277	TPGENE13254	LOC100517674	311267290	KRTAP3-2	13994364	Krtap3-3	21536226	LOC100294937	297487058	\	Keratin-associated protein 3-2 OS=Mus musculus GN=Krtap3-2 PE=2 SV=2	L8IER7_BOSMU Uncharacterized protein OS=Bos grunniens mutus GN=M91_00516 PE=4 SV=1	IPR007659:Keratin, high-sulphur matrix protein	GO:0005198:structural molecule activity; Molecular Function;GO:0045095:keratin filament; Cellular Component;
TPGENE13455	10			LWGENE09062	BKGENE00426	BMGENE00417	HAGENE06343	JHGENE01853	LAGENE04275	MSGENE02012	PIGENE06920	RCGENE13403	TPGENE13455	\	\	C1orf64	30519894	Gm694	85701868	LOC101909482	528929609	\	Uncharacterized protein C1orf64 OS=Homo sapiens GN=C1orf64 PE=2 SV=1	M3WCT7_FELCA Uncharacterized protein OS=Felis catus GN=C1orf64 PE=4 SV=1	IPR027852:Protein of unknown function DUF4654	\
TPGENE14268	10			LWGENE20481	BKGENE20434	BMGENE20502	HAGENE20655	JHGENE20447	LAGENE20423	MSGENE20720	PIGENE20712	RCGENE20287	TPGENE14268	\	\	PIRT	157426881	Pirt	568972391	PIRT	741963178	\	Phosphoinositide-interacting protein OS=Homo sapiens GN=PIRT PE=2 SV=2	F6X7L3_HORSE Uncharacterized protein OS=Equus caballus GN=PIRT PE=4 SV=1	IPR028068:Phosphoinositide-interacting protein	\
TPGENE14376	1			\	\	\	\	\	\	\	\	\	TPGENE14376	\	\	FRMD3	350276220	2310002L09Rik	239937495	FRMD3	114052346	\	FERM domain-containing protein 3 OS=Homo sapiens GN=FRMD3 PE=2 SV=1	I3N8G9_SPETR Uncharacterized protein OS=Spermophilus tridecemlineatus PE=4 SV=1	\	GO:0005737:ferm domain-containing protein 3 isoform 5;GO:0005856:ferm domain-containing protein 3 isoform 5;GO:0008092:ferm domain-containing protein 3 isoform 5;GO:0016021:ferm domain-containing protein 3 isoform 5;GO:0019898:ferm domain-containing protein 3 isoform 5;
TPGENE14729	10			LWGENE20254	BKGENE20573	BMGENE20873	HAGENE20522	JHGENE20627	LAGENE20435	MSGENE20599	PIGENE20623	RCGENE20432	TPGENE14729	LOC100519939	545886914	SMIM10	254540173	Smim10l1	254540194	SMIM10	254540185	\	Small integral membrane protein 10 OS=Homo sapiens GN=SMIM10 PE=2 SV=4	H0XM67_OTOGA Uncharacterized protein (Fragment) OS=Otolemur garnettii PE=4 SV=1	\	\
TPGENE16147	1			\	\	\	\	\	\	\	\	\	TPGENE16147	MN1	545869387	MN1	55956910	Mn1	124486985	MN1	741893122	\	Probable tumor suppressor protein MN1 OS=Homo sapiens GN=MN1 PE=1 SV=3	H0XLS3_OTOGA Uncharacterized protein OS=Otolemur garnettii GN=MN1 PE=4 SV=1	\	\
TPGENE16341	10			LWGENE20195	BKGENE20441	BMGENE20557	HAGENE20603	JHGENE20745	LAGENE20549	MSGENE20415	PIGENE20668	RCGENE20395	TPGENE16341	C4H8orf59	545821131	C8orf59	767951782	1810022K09Rik	153791234	C14H8orf59	158519815	\	Uncharacterized protein C8orf59 OS=Homo sapiens GN=C8orf59 PE=1 SV=2	G1L6K0_AILME Uncharacterized protein OS=Ailuropoda melanoleuca GN=LOC100473688 PE=4 SV=1	\	\
TPGENE16410	10			LWGENE13478	BKGENE16036	BMGENE08794	HAGENE13741	JHGENE17179	LAGENE15291	MSGENE07505	PIGENE12153	RCGENE14588	TPGENE16410	\	\	ATG101	31542675	Atg101	568993151	ATG101	741925791	\	Autophagy-related protein 101 OS=Bos taurus GN=ATG101 PE=2 SV=1	L8HW94_BOSMU Autophagy-related protein 101 OS=Bos grunniens mutus GN=M91_10623 PE=4 SV=1	IPR012445:Autophagy-related protein 1010	GO:0000045:autophagy-related protein 101;GO:0000407:autophagy-related protein 101;GO:0032403:autophagy-related protein 101;GO:0042802:autophagy-related protein 101;
TPGENE17168	1			\	\	\	\	\	\	\	\	\	TPGENE17168	DMRT-1	47523030	DMRT1	767954624	\	\	\	\	\	Doublesex and mab-3 related transcription factor 1 OS=Bos taurus GN=DMRT1 PE=2 SV=2	L8IAS2_BOSMU Doublesex-and mab-3-related transcription factor 1 OS=Bos grunniens mutus GN=M91_20989 PE=4 SV=1	IPR026607:DMRT/protein doublesex/protein male abnormal 3	GO:0003700:sequence-specific DNA binding transcription factor activity; Molecular Function;GO:0005634:nucleus; Cellular Component;GO:0006355:regulation of transcription, DNA-dependent; Biological Process;
TPGENE17328	10			LWGENE10766	BKGENE19679	BMGENE14369	HAGENE19476	JHGENE10130	LAGENE08396	MSGENE06849	PIGENE07593	RCGENE12224	TPGENE17328	\	\	C1orf116	578801475	AA986860	162417980	C16H1orf116	148540312	\	Specifically androgen-regulated gene protein OS=Bos taurus GN=SARG PE=2 SV=1	L8IV57_BOSMU Specifically androgen-regulated protein OS=Bos grunniens mutus GN=M91_02277 PE=4 SV=1	IPR026152:Specifically androgen-regulated gene protein	\
TPGENE18114	10			LWGENE00164	BKGENE06328	BMGENE11635	HAGENE19779	JHGENE15825	LAGENE05293	MSGENE05526	PIGENE05112	RCGENE02441	TPGENE18114	TESPA1	545825551	SSFA2	28557788	Ssfa2	194473671	SSFA2	300797544	\	Sperm-specific antigen 2 OS=Homo sapiens GN=SSFA2 PE=1 SV=3	M3V801_PIG Sperm specific antigen 2 tv1 OS=Sus scrofa GN=SSFA2 PE=2 SV=1	IPR026648:Sperm-specific antigen 2	GO:0003779:actin binding; Molecular Function;GO:0005886:plasma membrane; Cellular Component;
TPGENE18233	10			LWGENE11142	BKGENE14636	BMGENE11587	HAGENE09437	JHGENE18129	LAGENE01421	MSGENE18227	PIGENE14497	RCGENE11223	TPGENE18233	\	\	TMEM121	13376888	Tmem121	569016867	\	\	\	Transmembrane protein 121 OS=Mus musculus GN=Tmem121 PE=2 SV=1	K7ZLB0_PIG Putative transmembrane protein 121-like protein OS=Sus scrofa GN=TMEM121 PE=4 SV=1	\	\
TPGENE18237	4			LWGENE20449	\	\	\	\	\	\	PIGENE20676	RCGENE20406	TPGENE18237	\	\	\	\	\	\	\	\	\	\	\	\	\
TPGENE18382	10			LWGENE16953	BKGENE18370	BMGENE04357	HAGENE18174	JHGENE04530	LAGENE15052	MSGENE04697	PIGENE13464	RCGENE14742	TPGENE18382	\	\	CREBL2	4503035	Crebl2	29244124	CREBL2	115497320	\	cAMP-responsive element-binding protein-like 2 OS=Bos taurus GN=CREBL2 PE=1 SV=1	M3V853_PIG cAMP responsive element binding protein-like 2 OS=Sus scrofa GN=CREBL2 PE=2 SV=1	IPR004827:Basic-leucine zipper domain	GO:0003700:sequence-specific DNA binding transcription factor activity; Molecular Function;GO:0005634:camp-responsive element-binding 2;GO:0006355:regulation of transcription, DNA-dependent; Biological Process;GO:0019048:camp-responsive element-binding 2;GO:0033138:camp-responsive element-binding 2;GO:0043565:sequence-specific DNA binding; Molecular Function;GO:0045600:camp-responsive element-bin…
TPGENE19008	10			LWGENE06367	BKGENE15411	BMGENE14932	HAGENE08453	JHGENE05157	LAGENE06071	MSGENE06080	PIGENE04867	RCGENE05398	TPGENE19008	FAM159B	335303988	FAM159A	111548662	Fam159a	150010529	FAM159A	528944558	\	Membrane protein FAM159A OS=Homo sapiens GN=FAM159A PE=2 SV=2	F6YCZ7_MACMU Uncharacterized protein OS=Macaca mulatta GN=FAM159A PE=2 SV=1	\	GO:0016021:unnamed protein product [Homo sapiens];
TPGENE19216	10			LWGENE01726	BKGENE09209	BMGENE13089	HAGENE10118	JHGENE02637	LAGENE09591	MSGENE02288	PIGENE10089	RCGENE19974	TPGENE19216	R3HCC1L	194041825	R3HCC1	675269460	R3hcc1	675269452	R3HCC1	359068349	\	R3H and coiled-coil domain-containing protein 1 OS=Homo sapiens GN=R3HCC1 PE=1 SV=2	F1MFT2_BOVIN Uncharacterized protein (Fragment) OS=Bos taurus GN=R3HCC1 PE=2 SV=2	IPR001374:Single-stranded nucleic acid binding R3H	GO:0003676:nucleic acid binding; Molecular Function;
TPGENE19872	10			LWGENE20233	BKGENE20572	BMGENE20508	HAGENE20410	JHGENE20459	LAGENE20451	MSGENE20458	PIGENE20713	RCGENE20492	TPGENE19872	\	\	\	\	\	\	PRR33	741980763	\	Uncharacterized protein C11orf89 OS=Homo sapiens GN=C11orf89 PE=4 SV=2	L8I649_BOSMU Uncharacterized protein (Fragment) OS=Bos grunniens mutus GN=M91_21285 PE=4 SV=1	IPR028004:Protein of unknown function DUF4643	\
TPGENE20292	10			LWGENE11144	BKGENE14638	BMGENE11589	HAGENE20147	JHGENE18127	LAGENE01423	MSGENE18224	PIGENE20215	RCGENE11225	TPGENE20292	LOC102160736	545894725	CRIP1	4503047	Crip1	6681015	CRIP1	70778794	\	Cysteine-rich protein 1 OS=Homo sapiens GN=CRIP1 PE=1 SV=3	K9IR03_DESRO Putative regulatory protein mlp (Fragment) OS=Desmodus rotundus PE=2 SV=1	IPR001781:Zinc finger, LIM-type	GO:0008270:zinc ion binding; Molecular Function;
TPGENE20350	10			LWGENE15959	BKGENE01901	BMGENE00882	HAGENE19200	JHGENE09411	LAGENE11043	MSGENE11104	PIGENE10600	RCGENE09526	TPGENE20350	LOC102167889	545884339	RNF168	31377566	Rnf168	169790808	RNF168	261490701	\	E3 ubiquitin-protein ligase RNF168 OS=Bos taurus GN=RNF168 PE=2 SV=2	M3WSK4_FELCA Uncharacterized protein OS=Felis catus GN=RNF168 PE=4 SV=1	\	\
BMGENE01194	1			\	\	BMGENE01194	\	\	\	\	\	\	\	LOC102166890	545874536	RPL10	746817430	Rpl10	16418339	LOC104973825	741948403	60S ribosomal protein L10-like; K02866 large subunit ribosomal protein L10e	60S ribosomal protein L10 OS=Rattus norvegicus GN=Rpl10 PE=1 SV=3	I7GHK4_MACFA Macaca fascicularis brain cDNA clone: QorA-13103, similar to human ribosomal protein L10 (RPL10), mRNA, RefSeq: NM_006013.2 OS=Macaca fascicularis PE=2 SV=1	IPR016180:Ribosomal protein L10e/L16	GO:0003735:structural constituent of ribosome; Molecular Function;GO:0005840:ribosome; Cellular Component;GO:0006412:translation; Biological Process;
BKGENE08204	1			\	BKGENE08204	\	\	\	\	\	\	\	\	RPL15	346227216	RPL15	767923959	Rpl15	568985566	RPL15	529010276	60S ribosomal protein L15-like; K02877 large subunit ribosomal protein L15e	60S ribosomal protein L15 OS=Rattus norvegicus GN=Rpl15 PE=1 SV=2	E1BK63_BOVIN Ribosomal protein L15 OS=Bos taurus PE=3 SV=1	IPR000439:Ribosomal protein L15e	GO:0003735:structural constituent of ribosome; Molecular Function;GO:0005840:ribosome; Cellular Component;GO:0006412:translation; Biological Process;GO:0022625:tpa: ribosomal protein l15-like;
TPGENE17761	1			\	\	\	\	\	\	\	\	\	TPGENE17761	RPL15	346227216	RPL15	767923959	Rpl15	568985566	RPL15	529010276	60S ribosomal protein L15-like; K02877 large subunit ribosomal protein L15e	60S ribosomal protein L15 OS=Rattus norvegicus GN=Rpl15 PE=1 SV=2	E1BK63_BOVIN Ribosomal protein L15 OS=Bos taurus PE=3 SV=1	IPR000439:Ribosomal protein L15e	GO:0003735:structural constituent of ribosome; Molecular Function;GO:0005840:ribosome; Cellular Component;GO:0006412:translation; Biological Process;GO:0022625:tpa: ribosomal protein l15-like;
BKGENE00510	10			LWGENE17805	BKGENE00510	BMGENE13619	HAGENE12637	JHGENE02683	LAGENE11368	MSGENE06952	PIGENE00220	RCGENE19864	TPGENE12052	TMC5	545814757	TMC6	767993383	Tmc6	568973512	TMC6	741964643	7 transmembrane receptor; K10877 DNA repair and recombination protein RAD54B [EC:3.6.4.-]	Transmembrane channel-like protein 6 OS=Homo sapiens GN=TMC6 PE=1 SV=2	M3VK36_PIG Transmembrane channel-like 6 tv1 OS=Sus scrofa GN=TMC6 PE=2 SV=1	IPR012496:TMC	GO:0016021:integral to membrane; Cellular Component;
TPGENE12051	10			LWGENE17806	BKGENE00509	BMGENE13618	HAGENE12638	JHGENE02684	LAGENE11367	MSGENE06953	PIGENE00219	RCGENE19863	TPGENE12051	TMC4	335290169	TMC8	23943900	Tmc8	304434590	TMC8	297487377	7 transmembrane receptor; K10877 DNA repair and recombination protein RAD54B [EC:3.6.4.-]	Transmembrane channel-like protein 8 OS=Mus musculus GN=Tmc8 PE=2 SV=2	L8HRL9_BOSMU Transmembrane channel-like protein 8 (Fragment) OS=Bos grunniens mutus GN=M91_08211 PE=4 SV=1	IPR012496:TMC	GO:0016021:integral to membrane; Cellular Component;
BKGENE16386	9			LWGENE19414	BKGENE16386	BMGENE03206	HAGENE20080	JHGENE06970	LAGENE19191	MSGENE12084	PIGENE02782	\	TPGENE02396	ADAMTSL1	545803064	ADAMTSL1	767955388	Adamtsl1	568927627	ADAMTSL1	528908202	A disintegrin and metalloproteinase with thrombospondin motifs 20-like; K09609 a disintegrin and metalloproteinase with thrombospondin motifs 20 [EC:3.4.24.-]	ADAMTS-like protein 1 OS=Homo sapiens GN=ADAMTSL1 PE=1 SV=4	M3W2Y5_FELCA Uncharacterized protein OS=Felis catus GN=ADAMTSL1 PE=4 SV=1	IPR000884:Thrombospondin, type 1 repeat;IPR003598:Immunoglobulin subtype 2;IPR003599:Immunoglobulin subtype;IPR007110:Immunoglobulin-like domain;IPR013098:Immunoglobulin I-set;IPR013273:Peptidase M12B, ADAM-TS	GO:0005515:protein binding; Molecular Function;GO:0005578:proteinaceous extracellular matrix; Cellular Component;GO:0008237:metallopeptidase activity; Molecular Function;GO:0008270:zinc ion binding; Molecular Function;
LAGENE19192	1			\	\	\	\	\	LAGENE19192	\	\	\	\	LOC100739211	545840431	ADAMTSL1	154275765	Adamtsl1	755506950	ADAMTSL1	741881764	A disintegrin and metalloproteinase with thrombospondin motifs 6-like; K08625 a disintegrin and metalloproteinase with thrombospondin motifs 10 [EC:3.4.24.-]	ADAMTS-like protein 1 OS=Homo sapiens GN=ADAMTSL1 PE=1 SV=4	G1LWB5_AILME Uncharacterized protein OS=Ailuropoda melanoleuca GN=ADAMTSL1 PE=4 SV=1	IPR000884:Thrombospondin, type 1 repeat;IPR013273:Peptidase M12B, ADAM-TS	GO:0005578:proteinaceous extracellular matrix; Cellular Component;GO:0008237:metallopeptidase activity; Molecular Function;GO:0008270:zinc ion binding; Molecular Function;
HAGENE20310	1			\	\	\	HAGENE20310	\	\	\	\	\	\	A	47523246	ABO	58331216	Abo	224967118	ABO	118151396	A; blood group A transferase-like; K00709 histo-blood group ABO system transferase [EC:2.4.1.40 2.4.1.37]	Histo-blood group ABO system transferase 1 OS=Rattus norvegicus GN=Abo PE=1 SV=1	O77563_PIG Putative blood group A transferase OS=Sus scrofa GN=A PE=2 SV=1	IPR005076:Glycosyl transferase, family 6	GO:0005975:carbohydrate metabolic process; Biological Process;GO:0016020:membrane; Cellular Component;GO:0016758:transferase activity, transferring hexosyl groups; Molecular Function;
MSGENE13838	1			\	\	\	\	\	\	MSGENE13838	\	\	\	A	47523246	ABO	58331216	Abo	224967118	ABO	118151396	A; blood group A transferase-like; K00709 histo-blood group ABO system transferase [EC:2.4.1.40 2.4.1.37]	Histo-blood group ABO system transferase 1 OS=Rattus norvegicus GN=Abo PE=1 SV=1	F8QQE5_PIG UDP-GalNAc transferase A OS=Sus scrofa PE=4 SV=1	IPR005076:Glycosyl transferase, family 6	GO:0005975:carbohydrate metabolic process; Biological Process;GO:0016020:membrane; Cellular Component;GO:0016758:transferase activity, transferring hexosyl groups; Molecular Function;
BKGENE20769	10			LWGENE05153	BKGENE20769	BMGENE14131	HAGENE18244	JHGENE20741	LAGENE18819	MSGENE19631	PIGENE18304	RCGENE09889	TPGENE01903	LOC100623616	545894352	AADACL2	206597554	Aadacl2	189339213	AADACL2	528930317	AADACL2; arylacetamide deacetylase-like 2; K14350 arylacetamide deacetylase-like 2 [EC:3.1.1.-]	Arylacetamide deacetylase-like 2 OS=Homo sapiens GN=AADACL2 PE=2 SV=3	G1PG61_MYOLU Uncharacterized protein OS=Myotis lucifugus PE=4 SV=1	IPR013094:Alpha/beta hydrolase fold-3	GO:0008152:metabolic process; Biological Process;GO:0016787:hydrolase activity; Molecular Function;
RCGENE10501	7			LWGENE07671	\	BMGENE01035	HAGENE17623	JHGENE10259	\	MSGENE08237	PIGENE04688	RCGENE10501	\	AARS	545829297	C7orf57	767944847	Gm11992	83776575	C4H7orf57	119331208	Aars; alanyl-tRNA synthetase (EC:6.1.1.7); K01872 alanyl-tRNA synthetase [EC:6.1.1.7]	Uncharacterized protein C7orf57 homolog OS=Bos taurus PE=2 SV=1	M3Z393_MUSPF Uncharacterized protein OS=Mustela putorius furo GN=C7orf57 PE=4 SV=1	\	\
BMGENE19121	1			\	\	BMGENE19121	\	\	\	\	\	\	\	\	\	AARSD1	387528025	Aarsd1	568975622	AARSD1	528995952	AARSD1; alanyl-tRNA synthetase domain containing 1; K07050	Alanyl-tRNA editing protein Aarsd1 OS=Homo sapiens GN=AARSD1 PE=1 SV=2	K7ETH7_PONAB Uncharacterized protein OS=Pongo abelii GN=AARSD1 PE=4 SV=1	\	\
MSGENE05439	10			LWGENE16036	BKGENE01716	BMGENE17241	HAGENE05145	JHGENE07141	LAGENE04536	MSGENE05439	PIGENE04995	RCGENE01593	TPGENE06312	PTGES3	545826037	PTGES3L-AARSD1	217416402	Aarsd1	21450213	AARSD1	528995952	AARSD1; alanyl-tRNA synthetase domain containing 1; K07050	Alanyl-tRNA editing protein Aarsd1 OS=Homo sapiens GN=AARSD1 PE=1 SV=2	F6ZBJ3_HORSE Uncharacterized protein (Fragment) OS=Equus caballus GN=PTGES3L-AARSD1 PE=4 SV=1	IPR007052:CS domain;IPR012947:Threonyl/alanyl tRNA synthetase, SAD;IPR018164:Alanyl-tRNA synthetase, class IIc, N-terminal	GO:0000166:nucleotide binding; Molecular Function;GO:0004813:alanine-tRNA ligase activity; Molecular Function;GO:0005524:ATP binding; Molecular Function;GO:0006419:alanyl-tRNA aminoacylation; Biological Process;GO:0016876:ligase activity, forming aminoacyl-tRNA and related compounds; Molecular Function;GO:0043039:tRNA aminoacylation; Biological Process;
MSGENE13934	10			LWGENE01310	BKGENE16956	BMGENE13884	HAGENE14918	JHGENE09200	LAGENE02481	MSGENE13934	PIGENE16518	RCGENE12919	TPGENE11263	ABCA4	545824080	ABCA2	578817158	Abca2	110225379	ABCA2	741945072	ABCA2; ATP-binding cassette, sub-family A (ABC1), member 2; K05642 ATP-binding cassette, subfamily A (ABC1), member 2	ATP-binding cassette sub-family A member 2 OS=Homo sapiens GN=ABCA2 PE=1 SV=3	L5K6T9_PTEAL ATP-binding cassette sub-family A member 2 OS=Pteropus alecto GN=PAL_GLEAN10012713 PE=4 SV=1	IPR002946:Intracellular chloride channel;IPR003439:ABC transporter-like;IPR003593:AAA+ ATPase domain;IPR004045:Glutathione S-transferase, N-terminal;IPR026082:ABC transporter A, ABCA	GO:0000166:nucleotide binding; Molecular Function;GO:0005247:voltage-gated chloride channel activity; Molecular Function;GO:0005515:protein binding; Molecular Function;GO:0005524:ATP binding; Molecular Function;GO:0006821:chloride transport; Biological Process;GO:0016020:membrane; Cellular Component;GO:0016887:ATPase activity; Molecular Function;GO:0017111:nucleoside-triphosphatase activity; Mole…
TPGENE11264	8			LWGENE01311	BKGENE16957	BMGENE13885	HAGENE14919	JHGENE09201	\	\	PIGENE16519	RCGENE12920	TPGENE11264	ABCA4	545824080	ABCA2	578817158	Abca2	110225379	ABCA2	741945072	ABCA2; ATP-binding cassette, sub-family A (ABC1), member 2; K05642 ATP-binding cassette, subfamily A (ABC1), member 2	ATP-binding cassette sub-family A member 2 OS=Homo sapiens GN=ABCA2 PE=1 SV=3	E2R5S8_CANFA Uncharacterized protein OS=Canis familiaris GN=ABCA2 PE=3 SV=2	IPR001503:Glycosyl transferase, family 10;IPR003439:ABC transporter-like;IPR026082:ABC transporter A, ABCA	GO:0005524:ATP binding; Molecular Function;GO:0006486:protein glycosylation; Biological Process;GO:0008417:fucosyltransferase activity; Molecular Function;GO:0016020:membrane; Cellular Component;GO:0016887:ATPase activity; Molecular Function;
JHGENE19048	1			\	\	\	\	JHGENE19048	\	\	\	\	\	LOC100738654	350590178	ABCA5	27262626	Abca5	568973405	ABCA5	528997656	ABCA5; ATP-binding cassette, sub-family A (ABC1), member 5; K05648 ATP-binding cassette, subfamily A (ABC1), member 5	ATP-binding cassette sub-family A member 5 OS=Homo sapiens GN=ABCA5 PE=2 SV=2	K7EJW6_HUMAN ATP-binding cassette sub-family A member 5 (Fragment) OS=Homo sapiens GN=ABCA5 PE=4 SV=1	IPR003439:ABC transporter-like;IPR026082:ABC transporter A, ABCA	GO:0000139:unnamed protein product [Homo sapiens];GO:0005524:ATP binding; Molecular Function;GO:0005765:unnamed protein product [Homo sapiens];GO:0010745:unnamed protein product [Homo sapiens];GO:0016021:unnamed protein product [Homo sapiens];GO:0016887:ATPase activity; Molecular Function;GO:0031902:unnamed protein product [Homo sapiens];GO:0033344:unnamed protein product [Homo sapiens];GO:003437…
BMGENE19459	1			\	\	BMGENE19459	\	\	\	\	\	\	\	ABCC12	545890957	ABCC11	767990724	Abcc12	568956771	ABCC11	741959054	ABCC11; ATP-binding cassette, sub-family C (CFTR/MRP), member 11; K05671 ATP-binding cassette, subfamily C (CFTR/MRP), member 11	ATP-binding cassette sub-family C member 11 OS=Homo sapiens GN=ABCC11 PE=1 SV=1	L8HS75_BOSMU ATP-binding cassette sub-family C member 11 OS=Bos grunniens mutus GN=M91_01362 PE=3 SV=1	IPR003439:ABC transporter-like;IPR003593:AAA+ ATPase domain	GO:0000166:nucleotide binding; Molecular Function;GO:0005524:ATP binding; Molecular Function;GO:0016887:ATPase activity; Molecular Function;GO:0017111:nucleoside-triphosphatase activity; Molecular Function;
LWGENE08590	9			LWGENE08590	BKGENE04433	BMGENE12856	HAGENE10410	JHGENE13371	LAGENE19971	MSGENE14784	\	RCGENE05544	TPGENE19204	ABCC3	350590470	ABCC11	21729873	Abcc12	568956766	ABCC11	741959054	ABCC11; ATP-binding cassette, sub-family C (CFTR/MRP), member 11; K05671 ATP-binding cassette, subfamily C (CFTR/MRP), member 11	ATP-binding cassette sub-family C member 11 OS=Homo sapiens GN=ABCC11 PE=1 SV=1	L8HS75_BOSMU ATP-binding cassette sub-family C member 11 OS=Bos grunniens mutus GN=M91_01362 PE=3 SV=1	IPR001140:ABC transporter, transmembrane domain;IPR003439:ABC transporter-like;IPR003593:AAA+ ATPase domain;IPR017940:ABC transporter, integral membrane type 1	GO:0000166:nucleotide binding; Molecular Function;GO:0005524:ATP binding; Molecular Function;GO:0006810:transport; Biological Process;GO:0016021:integral to membrane; Cellular Component;GO:0016887:ATPase activity; Molecular Function;GO:0017111:nucleoside-triphosphatase activity; Molecular Function;GO:0042626:ATPase activity, coupled to transmembrane movement of substances; Molecular Function;GO:0…
LAGENE01991	10			LWGENE06618	BKGENE07771	BMGENE06887	HAGENE00793	JHGENE17630	LAGENE01991	MSGENE00129	PIGENE16696	RCGENE11827	TPGENE09587	\	\	ABHD8	145611434	Abhd8	257153457	ABHD8	118151308	ABHD8; abhydrolase domain containing 8; K13701 abhydrolase domain-containing protein 8	Abhydrolase domain-containing protein 8 OS=Bos taurus GN=ABHD8 PE=2 SV=1	L8HQD9_BOSMU Abhydrolase domain-containing protein 8 OS=Bos grunniens mutus GN=M91_16700 PE=4 SV=1	IPR000073:Alpha/beta hydrolase fold-1;IPR000639:Epoxide hydrolase-like	GO:0003824:catalytic activity; Molecular Function;GO:0016787:abhydrolase domain-containing protein 8;
LAGENE13343	10			LWGENE09520	BKGENE16098	BMGENE07349	HAGENE12398	JHGENE08132	LAGENE13343	MSGENE15844	PIGENE15946	RCGENE00471	TPGENE20104	ACE2	178056703	TMEM27	15042969	Tmem27	569012142	TMEM27	115497794	ace2; angiotensin I converting enzyme 2; K09708 angiotensin-converting enzyme 2 [EC:3.4.17.23]	Collectrin OS=Bos taurus GN=TMEM27 PE=2 SV=1	M3XUA0_MUSPF Uncharacterized protein OS=Mustela putorius furo GN=Tmem27 PE=4 SV=1	IPR001548:Peptidase M2, peptidyl-dipeptidase A	GO:0006508:proteolysis; Biological Process;GO:0008237:metallopeptidase activity; Molecular Function;GO:0008241:peptidyl-dipeptidase activity; Molecular Function;GO:0016020:membrane; Cellular Component;
LWGENE13960	10			LWGENE13960	BKGENE05154	BMGENE11817	HAGENE14747	JHGENE16103	LAGENE15740	MSGENE16338	PIGENE01133	RCGENE16182	TPGENE04018	LOC100738544	350585563	ERRFI1	578799267	Errfi1	569019090	ERRFI1	118150960	activated CDC42 kinase 1-like; K08886 activated CDC42 kinase 1 [EC:2.7.10.2 2.7.11.1]	ERBB receptor feedback inhibitor 1 OS=Rattus norvegicus GN=Errfi1 PE=1 SV=1	F6XYX6_HORSE Uncharacterized protein OS=Equus caballus GN=ERRFI1 PE=4 SV=1	IPR015116:Cdc42 binding domain like;IPR021619:EGFR receptor inhibitor Mig-6	GO:0019901:erbb receptor feedback inhibitor 1;GO:0031234:erbb receptor feedback inhibitor 1;GO:0031953:erbb receptor feedback inhibitor 1;GO:0042059:erbb receptor feedback inhibitor 1;GO:0043589:erbb receptor feedback inhibitor 1;GO:0045616:erbb receptor feedback inhibitor 1;GO:0048286:erbb receptor feedback inhibitor 1;GO:0060426:erbb receptor feedback inhibitor 1;GO:0060428:erbb receptor feedba…
HAGENE07361	10			LWGENE08081	BKGENE08189	BMGENE18784	HAGENE07361	JHGENE02584	LAGENE12364	MSGENE09761	PIGENE11843	RCGENE13893	TPGENE08358	LOC100625101	350582836	MROH5	148727311	Mroh4	755552098	LOC101905222	528975390	activity-regulated cytoskeleton-associated protein-like; K15867 activity-regulated cytoskeleton-associated protein	Activity-regulated cytoskeleton-associated protein OS=Mus musculus GN=Arc PE=1 SV=1	G5E5X3_BOVIN Uncharacterized protein (Fragment) OS=Bos taurus PE=4 SV=1	IPR023263:Activity-regulated cytoskeleton-associated protein	\
TPGENE06717	9			LWGENE20616	BKGENE18228	BMGENE04207	HAGENE19374	JHGENE03579	LAGENE17521	MSGENE09850	\	RCGENE04832	TPGENE06717	LOC100153192	545840320	ADAMTS12	767934709	Adamts12	153945812	ADAMTS12	300797550	ADAMTS12; ADAM metallopeptidase with thrombospondin type 1 motif, 12; K08626 a disintegrin and metalloproteinase with thrombospondin motifs 12 [EC:3.4.24.-]	A disintegrin and metalloproteinase with thrombospondin motifs 12 OS=Homo sapiens GN=ADAMTS12 PE=1 SV=2	L5L049_PTEAL A disintegrin and metalloproteinase with thrombospondin motif 12 OS=Pteropus alecto GN=PAL_GLEAN10014074 PE=4 SV=1	IPR002870:Peptidase M12B, propeptide	GO:0004222:metalloendopeptidase activity; Molecular Function;GO:0006508:proteolysis; Biological Process;GO:0008270:zinc ion binding; Molecular Function;
TPGENE08520	1			\	\	\	\	\	\	\	\	\	TPGENE08520	LOC100739211	545840431	ADAMTSL1	767955392	Adamtsl1	568927631	ADAMTSL1	528908202	adamts6; ADAM metallopeptidase with thrombospondin type 1 motif, 6; K08621 a disintegrin and metalloproteinase with thrombospondin motifs 6 [EC:3.4.24.-]	ADAMTS-like protein 1 OS=Homo sapiens GN=ADAMTSL1 PE=1 SV=4	A6NIB9_HUMAN ADAMTS-like protein 1 OS=Homo sapiens GN=ADAMTSL1 PE=2 SV=1	IPR000884:Thrombospondin, type 1 repeat;IPR013273:Peptidase M12B, ADAM-TS	GO:0005578:proteinaceous extracellular matrix; Cellular Component;GO:0008237:metallopeptidase activity; Molecular Function;GO:0008270:zinc ion binding; Molecular Function;
TPGENE08500	1			\	\	\	\	\	\	\	\	\	TPGENE08500	ZMYM4	545892440	ZMYM6	115511046	Zmym4	568929631	ZMYM6	741922045	adenylate kinase 2, mitochondrial-like; K00939 adenylate kinase [EC:2.7.4.3]	Zinc finger MYM-type protein 6 OS=Homo sapiens GN=ZMYM6 PE=1 SV=2	L8ISW9_BOSMU Zinc finger MYM-type protein 6 OS=Bos grunniens mutus GN=M91_04486 PE=4 SV=1	IPR010507:Zinc finger, MYM-type;IPR011017:TRASH domain	GO:0008270:zinc ion binding; Molecular Function;
JHGENE07803	1			\	\	\	\	JHGENE07803	\	\	\	\	\	ADH1C	345441792	ADH6	4501939	Adh1	6724311	ADH6	528952463	ADH6; alcohol dehydrogenase 6 (class V); K13952 alcohol dehydrogenase 6 [EC:1.1.1.1]	Alcohol dehydrogenase 6 OS=Homo sapiens GN=ADH6 PE=2 SV=2	F1MZN9_BOVIN Uncharacterized protein OS=Bos taurus GN=ADH6 PE=3 SV=1	IPR002085:Alcohol dehydrogenase superfamily, zinc-type;IPR013149:Alcohol dehydrogenase, C-terminal	GO:0000166:tpa: class v alcohol dehydrogenase;GO:0004022:tpa: class v alcohol dehydrogenase;GO:0006069:tpa: class v alcohol dehydrogenase;GO:0008270:zinc ion binding; Molecular Function;GO:0009055:tpa: class v alcohol dehydrogenase;GO:0016491:oxidoreductase activity; Molecular Function;GO:0045471:tpa: class v alcohol dehydrogenase;GO:0046872:tpa: class v alcohol dehydrogenase;GO:0055114:oxidation…
BMGENE00725	10			LWGENE01975	BKGENE03212	BMGENE00725	HAGENE05210	JHGENE01472	LAGENE14692	MSGENE01379	PIGENE20010	RCGENE02422	TPGENE06092	ADIPOQ	47523796	OTOL1	530373902	Otol1	260166678	MGC137014	114051225	adiponectin-like; K07296 adiponectin	Protein HP-20 homolog OS=Bos taurus PE=2 SV=1	L8IEC8_BOSMU Protein HP-20-like protein (Fragment) OS=Bos grunniens mutus GN=M91_02263 PE=4 SV=1	IPR001073:Complement C1q protein;IPR008160:Collagen triple helix repeat	\
TPGENE13870	10			LWGENE20613	BKGENE20597	BMGENE20636	HAGENE20460	JHGENE20440	LAGENE20504	MSGENE20582	PIGENE20388	RCGENE20312	TPGENE13870	\	\	ADPGK	767985503	Adpgk	21312406	ADPGK	126722892	ADPGK; ADP-dependent glucokinase; K08074 ADP-dependent glucokinase [EC:2.7.1.147]	ADP-dependent glucokinase OS=Bos taurus GN=ADPGK PE=2 SV=1	F6W089_HORSE Uncharacterized protein OS=Equus caballus GN=ADPGK PE=4 SV=1	IPR007666:ADP-specific phosphofructokinase/glucokinase	GO:0005975:carbohydrate metabolic process; Biological Process;GO:0016773:phosphotransferase activity, alcohol group as acceptor; Molecular Function;
BMGENE13614	9			LWGENE17381	BKGENE00506	BMGENE13614	HAGENE12641	\	LAGENE11364	MSGENE19148	PIGENE00215	RCGENE19859	TPGENE12047	\	\	AFMID	192807282	Afmid	21746157	AFMID	300795368	AFMID; arylformamidase; K01432 arylformamidase [EC:3.5.1.9]	Kynurenine formamidase OS=Homo sapiens GN=AFMID PE=2 SV=2	E1BLL5_BOVIN Kynurenine formamidase OS=Bos taurus GN=AFMID PE=3 SV=2	IPR013094:Alpha/beta hydrolase fold-3	GO:0005737:probable arylformamidase;GO:0008152:metabolic process; Biological Process;GO:0016787:hydrolase activity; Molecular Function;
JHGENE02686	10			LWGENE17809	BKGENE00505	BMGENE13613	HAGENE12642	JHGENE02686	LAGENE11363	MSGENE06957	PIGENE00214	RCGENE19858	TPGENE12046	BIRC5	47523080	AFMID	767993575	Afmid	21746157	AFMID	300795368	AFMID; arylformamidase; K01432 arylformamidase [EC:3.5.1.9]	Kynurenine formamidase OS=Homo sapiens GN=AFMID PE=2 SV=2	E1BLL5_BOVIN Kynurenine formamidase OS=Bos taurus GN=AFMID PE=3 SV=2	IPR001370:Baculoviral inhibition of apoptosis protein repeat;IPR013094:Alpha/beta hydrolase fold-3	GO:0005737:probable arylformamidase;GO:0008152:metabolic process; Biological Process;GO:0016787:hydrolase activity; Molecular Function;
LAGENE00414	10			LWGENE00242	BKGENE08088	BMGENE10369	HAGENE01469	JHGENE05708	LAGENE00414	MSGENE09749	PIGENE19395	RCGENE16960	TPGENE02419	AGAP3	545881857	AGAP2	7661962	LOC105242480	755482858	AGAP2	528949400	AGAP2; ArfGAP with GTPase domain, ankyrin repeat and PH domain 2; K17848 Arf-GAP with GTPase, ANK repeat and PH domain-containing protein 2	Arf-GAP with GTPase, ANK repeat and PH domain-containing protein 2 OS=Homo sapiens GN=AGAP2 PE=1 SV=2	F6PYY5_CALJA Uncharacterized protein OS=Callithrix jacchus GN=AGAP2 PE=4 SV=1	IPR001806:Small GTPase superfamily;IPR003579:Small GTPase superfamily, Rab type;IPR013684:Mitochondrial Rho-like;IPR020849:Small GTPase superfamily, Ras type	GO:0003924:GTPase activity; Molecular Function;GO:0005525:GTP binding; Molecular Function;GO:0005622:intracellular; Cellular Component;GO:0006184:GTP catabolic process; Biological Process;GO:0007165:signal transduction; Biological Process;GO:0007264:small GTPase mediated signal transduction; Biological Process;GO:0015031:protein transport; Biological Process;GO:0016020:membrane; Cellular Componen…
PIGENE19771	10			LWGENE11459	BKGENE19909	BMGENE00822	HAGENE05047	JHGENE03713	LAGENE08951	MSGENE19707	PIGENE19771	RCGENE18811	TPGENE10939	WDR5	545892590	WDR44	45238858	Wdr44	793423751	WDR44	27807499	AHI1; Abelson helper integration site 1; K16740 jouberin	WD repeat-containing protein 44 OS=Bos taurus GN=WDR44 PE=1 SV=1	M3TYU5_PIG WD repeat-containing protein 44 isoform 1 OS=Sus scrofa GN=WDR44 PE=2 SV=1	IPR001680:WD40 repeat;IPR017986:WD40-repeat-containing domain;IPR020472:G-protein beta WD-40 repeat	GO:0005515:protein binding; Molecular Function;GO:0005794:tpa: wd repeat-containing protein 44;GO:0005829:tpa: wd repeat-containing protein 44;GO:0010008:tpa: wd repeat-containing protein 44;GO:0048471:tpa: wd repeat-containing protein 44;
BMGENE16165	10			LWGENE07135	BKGENE13666	BMGENE16165	HAGENE03423	JHGENE04357	LAGENE14191	MSGENE19767	PIGENE05443	RCGENE10129	TPGENE14252	AKAP1	325652138	AKAP1	530412936	Akap1	110347489	AKAP1	741961990	AKAP1; A kinase (PRKA) anchor protein 1; K16518 A-kinase anchor protein 1, mitochondrial	A-kinase anchor protein 1, mitochondrial OS=Homo sapiens GN=AKAP1 PE=1 SV=1	E7FLX9_PIG A kinase anchor protein 1 OS=Sus scrofa GN=AKAP1 PE=2 SV=1	IPR002999:Tudor domain;IPR004087:K Homology domain;IPR004088:K Homology domain, type 1	GO:0003723:RNA binding; Molecular Function;
JHGENE14422	10			LWGENE07710	BKGENE08991	BMGENE19354	HAGENE07376	JHGENE14422	LAGENE03785	MSGENE17403	PIGENE01636	RCGENE04067	TPGENE17960	AKAP17B	545886531	AKAP17A	41152097	Akap17b	569009071	LOC100850391	741912538	AKAP17A; A kinase (PRKA) anchor protein 17A; K13169 splicing factor, arginine/serine-rich 17	A-kinase anchor protein 17A OS=Homo sapiens GN=AKAP17A PE=1 SV=2	F6YZR5_HORSE Uncharacterized protein OS=Equus caballus GN=AKAP17A PE=4 SV=1	\	\
BMGENE01383	10			LWGENE16570	BKGENE20128	BMGENE01383	HAGENE08689	JHGENE02355	LAGENE08920	MSGENE05625	PIGENE19163	RCGENE02225	TPGENE13365	ADH1C	345441792	ADH6	156523966	Adh6a	124286789	ADH6	115495907	alcohol dehydrogenase 1-like; K13951 alcohol dehydrogenase 1/7 [EC:1.1.1.1]	Alcohol dehydrogenase 1 OS=Struthio camelus GN=ADH1 PE=1 SV=1	Q0P581_BOVIN Alcohol dehydrogenase 6 (Class V) OS=Bos taurus GN=ADH6 PE=2 SV=1	IPR002085:Alcohol dehydrogenase superfamily, zinc-type;IPR013149:Alcohol dehydrogenase, C-terminal;IPR013154:Alcohol dehydrogenase GroES-like;IPR020843:Polyketide synthase, enoylreductase	GO:0000166:class v alcohol dehydrogenase;GO:0004022:class v alcohol dehydrogenase;GO:0006069:class v alcohol dehydrogenase;GO:0008270:zinc ion binding; Molecular Function;GO:0009055:class v alcohol dehydrogenase;GO:0016491:oxidoreductase activity; Molecular Function;GO:0016747:transferase activity, transferring acyl groups other than amino-acyl groups; Molecular Function;GO:0045471:class v alcoho…
BKGENE13837	1			\	BKGENE13837	\	\	\	\	\	\	\	\	\	\	C3orf80	270265902	1110032F04Rik	269847632	C1H3orf80	359062641	alcohol dehydrogenase E chain-like; K13951 alcohol dehydrogenase 1/7 [EC:1.1.1.1]	Uncharacterized membrane protein C3orf80 OS=Homo sapiens GN=C3orf80 PE=2 SV=1	G5BVX6_HETGA Uncharacterized protein OS=Heterocephalus glaber GN=GW7_13396 PE=4 SV=1	\	\
RCGENE00331	1			\	\	\	\	\	\	\	\	RCGENE00331	\	KCTD12	545855278	KCTD16	767937813	Kctd16	247494171	KCTD16	741933966	alg8; ALG8, alpha-1,3-glucosyltransferase; K03849 alpha-1,3-glucosyltransferase [EC:2.4.1.265]	BTB/POZ domain-containing protein KCTD16 OS=Homo sapiens GN=KCTD16 PE=2 SV=1	L8IN19_BOSMU BTB/POZ domain-containing protein KCTD16 (Fragment) OS=Bos grunniens mutus GN=M91_04735 PE=4 SV=1	IPR000210:BTB/POZ-like;IPR003131:Potassium channel tetramerisation-type BTB domain	GO:0005515:protein binding; Molecular Function;GO:0051260:protein homooligomerization; Biological Process;
BMGENE07685	1			\	\	BMGENE07685	\	\	\	\	\	\	\	AMH	378873778	AMH	157266298	Amh	568966454	AMH	27819612	AMH, MIS; anti-Mullerian hormone; K04665 anti-mullerian hormone	Muellerian-inhibiting factor OS=Sus scrofa GN=AMH PE=2 SV=2	F2YMM5_HORSE Anti-Mullerian hormone OS=Equus caballus PE=2 SV=1	IPR001839:Transforming growth factor-beta, C-terminal;IPR006799:Anti-Mullerian hormone, N-terminal;IPR021203:Muellerian-inhibiting factor	GO:0008083:growth factor activity; Molecular Function;GO:0008406:gonad development; Biological Process;
LAGENE10050	10			LWGENE18865	BKGENE10501	BMGENE07684	HAGENE10976	JHGENE06769	LAGENE10050	MSGENE02765	PIGENE11156	RCGENE18918	TPGENE04061	AMH	378873778	AMH	157266298	Amh	568966454	AMH	27819612	AMH, MIS; anti-Mullerian hormone; K04665 anti-mullerian hormone	Muellerian-inhibiting factor OS=Sus scrofa GN=AMH PE=2 SV=2	F2YMM5_HORSE Anti-Mullerian hormone OS=Equus caballus PE=2 SV=1	IPR001839:Transforming growth factor-beta, C-terminal;IPR006799:Anti-Mullerian hormone, N-terminal;IPR021203:Muellerian-inhibiting factor	GO:0008083:growth factor activity; Molecular Function;GO:0008406:gonad development; Biological Process;
RCGENE18919	1			\	\	\	\	\	\	\	\	RCGENE18919	\	AMH	378873778	AMH	157266298	Amh	568966454	AMH	27819612	AMH, MIS; anti-Mullerian hormone; K04665 anti-mullerian hormone	Muellerian-inhibiting factor OS=Sus scrofa GN=AMH PE=2 SV=2	F2YMM5_HORSE Anti-Mullerian hormone OS=Equus caballus PE=2 SV=1	IPR001839:Transforming growth factor-beta, C-terminal;IPR006799:Anti-Mullerian hormone, N-terminal;IPR021203:Muellerian-inhibiting factor	GO:0008083:growth factor activity; Molecular Function;GO:0008406:gonad development; Biological Process;
BMGENE19427	10			LWGENE13051	BKGENE13122	BMGENE19427	HAGENE16762	JHGENE19601	LAGENE00355	MSGENE05047	PIGENE12589	RCGENE14191	TPGENE03429	AMPD3	545808454	AMPD2	34147621	Ampd2	576067830	AMPD2	219804324	AMPD2, SPG63; adenosine monophosphate deaminase 2 (EC:3.5.4.6); K01490 AMP deaminase [EC:3.5.4.6]	AMP deaminase 2 OS=Homo sapiens GN=AMPD2 PE=1 SV=2	M3UYY5_PIG Adenosine monophosphate deaminase 2 tv2 OS=Sus scrofa GN=AMPD2 PE=2 SV=1	IPR001365:Adenosine/AMP deaminase domain;IPR006329:AMP deaminase	GO:0003876:AMP deaminase activity; Molecular Function;GO:0005829:adenosine monophosphate deaminase 2 (isoform l);GO:0006144:adenosine monophosphate deaminase 2 (isoform l);GO:0006188:IMP biosynthetic process; Biological Process;GO:0009168:purine ribonucleoside monophosphate biosynthetic process; Biological Process;GO:0019239:deaminase activity; Molecular Function;GO:0032264:adenosine monophosphat…
MSGENE19700	1			\	\	\	\	\	\	MSGENE19700	\	\	\	ZDHHC1	545829631	ZDHHC11	530378956	Zdhhc11	110625849	ZDHHC11B	741897840	AMTR_s00001p00123260; hypothetical protein; K16675 probable palmitoyltransferase ZDHHC14 [EC:2.3.1.-]	Probable palmitoyltransferase ZDHHC11 OS=Homo sapiens GN=ZDHHC11 PE=2 SV=1	F7B576_HORSE Uncharacterized protein (Fragment) OS=Equus caballus GN=LOC100057809 PE=4 SV=1	IPR001594:Zinc finger, DHHC-type, palmitoyltransferase	GO:0008270:zinc ion binding; Molecular Function;GO:0043169:probable palmitoyltransferase zdhhc11-like;
MSGENE00921	1			\	\	\	\	\	\	MSGENE00921	\	\	\	WDR13	545884721	WDR13	578838055	Wdr13	595763356	WDR13	529015256	AMTR_s00103p00026300; hypothetical protein; K14963 COMPASS component SWD3	WD repeat-containing protein 13 OS=Pongo abelii GN=WDR13 PE=2 SV=1	H9EPQ4_MACMU WD repeat-containing protein 13 isoform 1 OS=Macaca mulatta GN=WDR13 PE=2 SV=1	IPR001680:WD40 repeat;IPR017986:WD40-repeat-containing domain	GO:0005515:protein binding; Molecular Function;
TPGENE16864	9			LWGENE17757	BKGENE18133	\	HAGENE12589	JHGENE20096	LAGENE11416	MSGENE10400	PIGENE00268	RCGENE01653	TPGENE16864	LOC100524247	545815512	CASKIN2	217416347	Caskin2	31981530	CASKIN2	300795631	ankyrin 2,3/unc44; K15503 serine/threonine-protein phosphatase 6 regulatory ankyrin repeat subunit B	Caskin-2 OS=Homo sapiens GN=CASKIN2 PE=1 SV=2	L5KM48_PTEAL Caskin-2 OS=Pteropus alecto GN=PAL_GLEAN10014727 PE=4 SV=1	IPR001452:Src homology-3 domain;IPR001660:Sterile alpha motif domain;IPR002110:Ankyrin repeat;IPR011511:Variant SH3 domain;IPR020683:Ankyrin repeat-containing domain;IPR021129:Sterile alpha motif, type 1;IPR027001:Caskin/Ankyrin repeat-containing protein;IPR027013:Caskin	GO:0005515:protein binding; Molecular Function;
HAGENE02747	1			\	\	\	HAGENE02747	\	\	\	\	\	\	CD163L1	545827400	CD163	344179110	Cd163	281371423	WC1-10	741878289	antigen WC1.1-like; K06545 CD163 antigen	Antigen WC1.1 OS=Bos taurus PE=2 SV=1	Q29110_PIG Scavenger-receptor protein (Fragment) OS=Sus scrofa GN=WC1 PE=4 SV=1	IPR001190:SRCR domain;IPR017448:Speract/scavenger receptor-related	GO:0005044:scavenger receptor activity; Molecular Function;GO:0016020:membrane; Cellular Component;
LAGENE14899	1			\	\	\	\	\	LAGENE14899	\	\	\	\	CD163L1	545827400	CD163	344179110	Cd163	281371423	WC1-10	741878289	antigen WC1.1-like; K06545 CD163 antigen	Antigen WC1.1 OS=Bos taurus PE=2 SV=1	Q29110_PIG Scavenger-receptor protein (Fragment) OS=Sus scrofa GN=WC1 PE=4 SV=1	IPR001190:SRCR domain;IPR017448:Speract/scavenger receptor-related	GO:0005044:scavenger receptor activity; Molecular Function;GO:0016020:membrane; Cellular Component;
PIGENE14560	10			LWGENE12535	BKGENE20632	BMGENE20764	HAGENE20356	JHGENE20338	LAGENE13401	MSGENE20436	PIGENE14560	RCGENE20193	TPGENE14214	AP3S2	347300366	AP3S1	4502861	Ap3s1	6753078	AP3S1	114053131	AP3S1; adaptor-related protein complex 3, sigma 1 subunit; K12399 AP-3 complex subunit sigma	AP-3 complex subunit sigma-1 OS=Mus musculus GN=Ap3s1 PE=1 SV=2	Q3U8S0_MOUSE Adaptor-related protein complex 3, sigma 1 subunit OS=Mus musculus GN=Ap3s1 PE=2 SV=1	IPR016635:Adaptor protein complex, sigma subunit;IPR022775:AP complex, mu/sigma subunit;IPR027155:AP-3 complex subunit sigma	GO:0005515:ap-3 complex subunit sigma-1;GO:0005794:ap-3 complex subunit sigma-1;GO:0005802:ap-3 complex subunit sigma-1;GO:0006886:ap-3 complex subunit sigma-1;GO:0008089:ap-3 complex subunit sigma-1;GO:0008286:ap-3 complex subunit sigma-1;GO:0008565:protein transporter activity; Molecular Function;GO:0015031:protein transport; Biological Process;GO:0030123:AP-3 adaptor complex; Cellular Componen…
BKGENE08116	10			LWGENE12523	BKGENE08116	BMGENE19251	HAGENE12281	JHGENE14207	LAGENE04629	MSGENE12452	PIGENE17582	RCGENE07778	TPGENE00877	AP2M1	343790870	AP4M1	14917111	Ap4m1	163644298	AP4M1	116004417	AP4M1; adaptor-related protein complex 4, mu 1 subunit; K12402 AP-4 complex subunit mu-1	AP-4 complex subunit mu-1 OS=Bos taurus GN=AP4M1 PE=2 SV=1	I3MCU4_SPETR Uncharacterized protein OS=Spermophilus tridecemlineatus GN=AP4M1 PE=4 SV=1	IPR001392:Clathrin adaptor, mu subunit;IPR008968:Clathrin adaptor, mu subunit, C-terminal;IPR022775:AP complex, mu/sigma subunit	GO:0005515:protein binding; Molecular Function;GO:0006886:intracellular protein transport; Biological Process;GO:0016192:vesicle-mediated transport; Biological Process;GO:0030131:clathrin adaptor complex; Cellular Component;
MSGENE04694	1			\	\	\	\	\	\	MSGENE04694	\	\	\	\	\	APOLD1	194353993	Apold1	158186728	APOLD1	741927691	APOLD1; apolipoprotein L domain containing 1; K14480 apolipoprotein L	Apolipoprotein L domain-containing protein 1 OS=Homo sapiens GN=APOLD1 PE=2 SV=2	L5KMG5_PTEAL Apolipoprotein L domain-containing protein 1 OS=Pteropus alecto GN=PAL_GLEAN10015625 PE=4 SV=1	IPR008405:Apolipoprotein L	GO:0005576:extracellular region; Cellular Component;GO:0006869:lipid transport; Biological Process;GO:0008289:lipid binding; Molecular Function;GO:0042157:lipoprotein metabolic process; Biological Process;
TPGENE19810	10			LWGENE05756	BKGENE01261	BMGENE13053	HAGENE03476	JHGENE07112	LAGENE01252	MSGENE09739	PIGENE00889	RCGENE03122	TPGENE19810	APPL1	201066354	APPL1	6912242	Appl1	21699066	APPL1	149642983	APPL1; adaptor protein, phosphotyrosine interaction, PH domain and leucine zipper containing 1; K08733 DCC-interacting protein 13 alpha	DCC-interacting protein 13-alpha OS=Homo sapiens GN=APPL1 PE=1 SV=1	B5LX40_PIG Adaptor protein phosphotyrosine interaction PH domain and leucine zipper containing 1 OS=Sus scrofa GN=APPL1 PE=2 SV=1	IPR001849:Pleckstrin homology domain;IPR006020:PTB/PI domain	GO:0005515:protein binding; Molecular Function;GO:0005543:phospholipid binding; Molecular Function;
BKGENE08190	1			\	BKGENE08190	\	\	\	\	\	\	\	\	\	\	ARC	8567330	Arc	9055166	ARC	528975151	Arc; activity-regulated cytoskeleton-associated protein; K15867 activity-regulated cytoskeleton-associated protein	Activity-regulated cytoskeleton-associated protein OS=Mus musculus GN=Arc PE=1 SV=1	K4N399_BOSMU Activity-regulated cytoskeleton-associated protein OS=Bos mutus grunniens GN=ARC PE=2 SV=1	IPR023263:Activity-regulated cytoskeleton-associated protein	\
BMGENE18785	1			\	\	BMGENE18785	\	\	\	\	\	\	\	\	\	ARC	8567330	Arc	9055166	ARC	528975151	ARC; activity-regulated cytoskeleton-associated protein; K15867 activity-regulated cytoskeleton-associated protein	Activity-regulated cytoskeleton-associated protein OS=Mus musculus GN=Arc PE=1 SV=1	K4MQR4_BUBBU Activity-regulated cytoskeleton-associated protein OS=Bubalus bubalis GN=ARC PE=2 SV=1	IPR023263:Activity-regulated cytoskeleton-associated protein	\
MSGENE09762	1			\	\	\	\	\	\	MSGENE09762	\	\	\	\	\	ARC	8567330	Arc	9055166	ARC	528975151	ARC; activity-regulated cytoskeleton-associated protein; K15867 activity-regulated cytoskeleton-associated protein	Activity-regulated cytoskeleton-associated protein OS=Mus musculus GN=Arc PE=1 SV=1	K4MQR4_BUBBU Activity-regulated cytoskeleton-associated protein OS=Bubalus bubalis GN=ARC PE=2 SV=1	IPR023263:Activity-regulated cytoskeleton-associated protein	\
PIGENE11844	1			\	\	\	\	\	\	\	PIGENE11844	\	\	\	\	ARC	8567330	Arc	9055166	ARC	528975151	ARC; activity-regulated cytoskeleton-associated protein; K15867 activity-regulated cytoskeleton-associated protein	Activity-regulated cytoskeleton-associated protein OS=Mus musculus GN=Arc PE=1 SV=1	K4MQR4_BUBBU Activity-regulated cytoskeleton-associated protein OS=Bubalus bubalis GN=ARC PE=2 SV=1	IPR023263:Activity-regulated cytoskeleton-associated protein	\
BKGENE08273	8			LWGENE17498	BKGENE08273	BMGENE18722	HAGENE02120	\	LAGENE07357	MSGENE15503	PIGENE13221	RCGENE08281	\	COL14A1	545820338	COL20A1	768017758	Col20a1	568920453	COL20A1	741948461	ARFGAP1, ARFGAP3; ADP-ribosylation factor GTPase activating protein 1; K12492 ADP-ribosylation factor GTPase-activating protein 1	Collagen alpha-1(XX) chain OS=Homo sapiens GN=COL20A1 PE=1 SV=4	E1BFY7_BOVIN Uncharacterized protein OS=Bos taurus GN=COL20A1 PE=4 SV=2	IPR001164:Arf GTPase activating protein;IPR001791:Laminin G domain;IPR002035:von Willebrand factor, type A;IPR003961:Fibronectin, type III;IPR008160:Collagen triple helix repeat	GO:0005515:protein binding; Molecular Function;GO:0008060:ARF GTPase activator activity; Molecular Function;GO:0008270:zinc ion binding; Molecular Function;GO:0032312:regulation of ARF GTPase activity; Biological Process;
LAGENE10954	10			LWGENE17859	BKGENE06018	BMGENE13343	HAGENE12692	JHGENE02737	LAGENE10954	MSGENE13764	PIGENE08279	RCGENE08775	TPGENE12169	ARHGDIA	319401915	ARHGDIA	4757768	Arhgdia	568972328	ARHGDIA	741964387	ARHGDIA; Rho GDP dissociation inhibitor (GDI) alpha; K12462 Rho GDP-dissociation inhibitor	Rho GDP-dissociation inhibitor 1 OS=Bos taurus GN=ARHGDIA PE=1 SV=3	E7EI20_PIG Rho GDP dissociation inhibitor alpha OS=Sus scrofa GN=ARHGDIA PE=2 SV=1	IPR000406:RHO protein GDP dissociation inhibitor	GO:0005094:Rho GDP-dissociation inhibitor activity; Molecular Function;GO:0005737:cytoplasm; Cellular Component;
LWGENE17351	2			LWGENE17351	\	\	\	\	\	\	\	\	TPGENE20280	ARPC1B	197251938	ARPC1B	578813852	Arpc1b	160837788	ARPC1B	62460388	ARPC1B; actin related protein 2/3 complex, subunit 1B, 41kDa; K05757 actin related protein 2/3 complex, subunit 1A/1B	Actin-related protein 2/3 complex subunit 1B OS=Homo sapiens GN=ARPC1B PE=1 SV=3	B5APU6_PIG Actin related protein 2/3 complex subunit 1B OS=Sus scrofa PE=2 SV=1	IPR017383:ARP2/3 complex, 41kDa subunit (p41-arc)	GO:0003779:actin binding; Molecular Function;GO:0005856:cytoskeleton; Cellular Component;GO:0030833:regulation of actin filament polymerization; Biological Process;
LAGENE12365	1			\	\	\	\	\	LAGENE12365	\	\	\	\	MROH7	545835999	MROH5	148727311	Mroh4	294460010	LOC101905222	528975390	aryl hydrocarbon receptor-like; K09093 aryl hydrocarbon receptor	HEAT repeat-containing protein 7A OS=Homo sapiens GN=HEATR7A PE=1 SV=3	G5E5X3_BOVIN Uncharacterized protein (Fragment) OS=Bos taurus PE=4 SV=1	\	\
BKGENE02984	10			LWGENE20064	BKGENE02984	BMGENE20380	HAGENE20232	JHGENE20209	LAGENE20288	MSGENE20371	PIGENE20271	RCGENE19891	TPGENE08390	ASAP2	545819157	ASAP1	46094081	Asap1	451327601	ASAP1	28461267	ASAP1; ArfGAP with SH3 domain, ankyrin repeat and PH domain 1; K12488 Arf-GAP with SH3 domain, ANK repeat and PH domain-containing protein	Arf-GAP with SH3 domain, ANK repeat and PH domain-containing protein 1 OS=Homo sapiens GN=ASAP1 PE=1 SV=4	M1EII8_MUSPF ArfGAP with SH3 domain, ankyrin repeat and PH domain 1 (Fragment) OS=Mustela putorius furo PE=2 SV=1	\	\
JHGENE20318	1			\	\	\	\	JHGENE20318	\	\	\	\	\	ASB15	545882862	ASB14	578805671	Asb14	282721046	ASB14	741968942	ASB14; ankyrin repeat and SOCS box containing 14; K10336 ankyrin repeat and SOCS box protein 14	Ankyrin repeat and SOCS box protein 14 OS=Homo sapiens GN=ASB14 PE=2 SV=2	M3W4L3_FELCA Uncharacterized protein OS=Felis catus GN=ASB14 PE=4 SV=1	IPR001496:SOCS protein, C-terminal	GO:0005622:ankyrin repeat and socs box-containing isoform cra_a;GO:0016567:ankyrin repeat and socs box-containing isoform cra_a;GO:0035556:intracellular signal transduction; Biological Process;
PIGENE00890	10			LWGENE05755	BKGENE01262	BMGENE13052	HAGENE03475	JHGENE07111	LAGENE01253	MSGENE09738	PIGENE00890	RCGENE18272	TPGENE19809	ASB15	545882862	ASB14	578805671	Asb14	755547797	ASB14	741968942	ASB14; ankyrin repeat and SOCS box containing 14; K10336 ankyrin repeat and SOCS box protein 14	Ankyrin repeat and SOCS box protein 14 OS=Homo sapiens GN=ASB14 PE=2 SV=2	M3W4L3_FELCA Uncharacterized protein OS=Felis catus GN=ASB14 PE=4 SV=1	IPR001496:SOCS protein, C-terminal;IPR002110:Ankyrin repeat;IPR020683:Ankyrin repeat-containing domain	GO:0005515:protein binding; Molecular Function;GO:0035556:intracellular signal transduction; Biological Process;
TPGENE05308	10			LWGENE03061	BKGENE07926	BMGENE03964	HAGENE06439	JHGENE03458	LAGENE00685	MSGENE01756	PIGENE16563	RCGENE15671	TPGENE05308	ASIC1	350583930	ASIC2	9998944	Asic2	77404288	ASIC2	115497046	ASIC2; acid-sensing (proton-gated) ion channel 2; K04828 acid-sensing ion channel 2	Acid-sensing ion channel 2 OS=Homo sapiens GN=ASIC2 PE=1 SV=1	G3TPW5_LOXAF Uncharacterized protein (Fragment) OS=Loxodonta africana GN=ACCN1 PE=3 SV=1	IPR001873:Na+ channel, amiloride-sensitive	GO:0001101:hypothetical protein PANDA_000163 [Ailuropoda melanoleuca];GO:0003026:hypothetical protein PANDA_000163 [Ailuropoda melanoleuca];GO:0005272:sodium channel activity; Molecular Function;GO:0005887:hypothetical protein PANDA_000163 [Ailuropoda melanoleuca];GO:0006814:sodium ion transport; Biological Process;GO:0007602:hypothetical protein PANDA_000163 [Ailuropoda melanoleuca];GO:0007605:h…
HAGENE03310	10			LWGENE06156	BKGENE20223	BMGENE09415	HAGENE03310	JHGENE20204	LAGENE17258	MSGENE20258	PIGENE20233	RCGENE17481	TPGENE01999	GOT1	47522636	GOT1L1	117414139	Got1l1	58037453	GOT1L1	84000095	aspartate aminotransferase, cytoplasmic-like; K14454 aspartate aminotransferase, cytoplasmic [EC:2.6.1.1]	Putative aspartate aminotransferase, cytoplasmic 2 OS=Bos taurus GN=GOT1L1 PE=2 SV=1	F6VRG6_HORSE Uncharacterized protein OS=Equus caballus GN=GOT1L1 PE=4 SV=1	IPR000796:Aspartate/other aminotransferase;IPR004839:Aminotransferase, class I/classII	GO:0006520:cellular amino acid metabolic process; Biological Process;GO:0008483:transaminase activity; Molecular Function;GO:0009058:biosynthetic process; Biological Process;GO:0030170:pyridoxal phosphate binding; Molecular Function;
LWGENE08107	10			LWGENE08107	BKGENE03240	BMGENE15241	HAGENE16755	JHGENE18013	LAGENE03819	MSGENE09403	PIGENE17107	RCGENE11245	TPGENE13102	\	\	ASPG	320461543	Aspg	124487183	ASPG	297463457	ASPG; asparaginase; K13278 60kDa lysophospholipase [EC:3.1.1.5 3.1.1.47 3.5.1.1]	60 kDa lysophospholipase OS=Homo sapiens GN=ASPG PE=2 SV=3	F1MGH2_BOVIN Uncharacterized protein OS=Bos taurus GN=ASPG PE=4 SV=2	IPR002110:Ankyrin repeat;IPR006034:Asparaginase/glutaminase;IPR020683:Ankyrin repeat-containing domain	GO:0005515:protein binding; Molecular Function;GO:0006520:cellular amino acid metabolic process; Biological Process;
PIGENE08272	10			LWGENE17866	BKGENE06011	BMGENE13350	HAGENE12699	JHGENE02744	LAGENE10962	MSGENE13757	PIGENE08272	RCGENE08782	TPGENE12163	UBXN6	545810363	ASPSCR1	13129078	Aspscr1	30794438	ASPSCR1	157279869	ASPSCR1; alveolar soft part sarcoma chromosome region, candidate 1; K15627 tether containing UBX domain for GLUT4	Tether containing UBX domain for GLUT4 OS=Mus musculus GN=Aspscr1 PE=1 SV=1	A5PK76_BOVIN ASPSCR1 protein OS=Bos taurus GN=ASPSCR1 PE=2 SV=1	IPR001012:UBX;IPR021569:UBX domain containing protein TUG/UBX4	GO:0005515:protein binding; Molecular Function;
BKGENE17446	1			\	BKGENE17446	\	\	\	\	\	\	\	\	CREB1	153792683	ATF1	767974355	Atf1	86604724	ATF1	528948795	ATF1; activating transcription factor 1; K09053 activating transcription factor 1	Cyclic AMP-dependent transcription factor ATF-1 OS=Homo sapiens GN=ATF1 PE=1 SV=2	G3SLR0_LOXAF Uncharacterized protein (Fragment) OS=Loxodonta africana PE=4 SV=1	IPR001630:cAMP response element binding (CREB) protein	GO:0003677:DNA binding; Molecular Function;GO:0003700:sequence-specific DNA binding transcription factor activity; Molecular Function;GO:0005634:nucleus; Cellular Component;GO:0006355:regulation of transcription, DNA-dependent; Biological Process;
LAGENE05124	10			LWGENE00127	BKGENE04153	BMGENE11534	HAGENE19742	JHGENE15864	LAGENE05124	MSGENE10843	PIGENE05150	RCGENE03626	TPGENE17379	ATF7	545825396	ATF2	368711273	Atf2	568915114	ATF2	741916155	ATF2; activating transcription factor 2; K04450 cyclic AMP-dependent transcription factor ATF-2	Cyclic AMP-dependent transcription factor ATF-2 OS=Homo sapiens GN=ATF2 PE=1 SV=4	G5C944_HETGA Cyclic AMP-dependent transcription factor ATF-2 (Fragment) OS=Heterocephalus glaber GN=GW7_03004 PE=4 SV=1	IPR004827:Basic-leucine zipper domain	GO:0003700:sequence-specific DNA binding transcription factor activity; Molecular Function;GO:0006355:regulation of transcription, DNA-dependent; Biological Process;GO:0043565:sequence-specific DNA binding; Molecular Function;
TPGENE15608	10			LWGENE13581	BKGENE02441	BMGENE01558	HAGENE19341	JHGENE18642	LAGENE15918	MSGENE15586	PIGENE14064	RCGENE00010	TPGENE15608	ATG4B	298231123	ATG4B	47132611	Atg4b	27883848	ATG4B	47564102	ATG4B; autophagy related 4B, cysteine peptidase; K08342 cysteine protease ATG4 [EC:3.4.22.-]	Cysteine protease ATG4B OS=Homo sapiens GN=ATG4B PE=1 SV=2	D7RA22_PIG Autophagy related 4-like protein B OS=Sus scrofa GN=ATG4B PE=2 SV=1	IPR005078:Peptidase C54	\
BMGENE17390	10			LWGENE18500	BKGENE19298	BMGENE17390	HAGENE04967	JHGENE10168	LAGENE10558	MSGENE00021	PIGENE14523	RCGENE12777	TPGENE13788	LOC100738314	545887016	ATP11A	150421684	Atp11a	755524529	ATP11A	741887615	ATP11A, ATPIH, ATPIS; ATPase, class VI, type 11A (EC:3.6.3.1); K01530 phospholipid-translocating ATPase [EC:3.6.3.1]	Probable phospholipid-transporting ATPase IH OS=Homo sapiens GN=ATP11A PE=1 SV=3	M3UYZ6_PIG ATPase, class VI, type 11A tv2 (Fragment) OS=Sus scrofa GN=ATP11A PE=2 SV=1	IPR001757:Cation-transporting P-type ATPase;IPR006539:Phospholipid-transporting P-type ATPase, subfamily IV;IPR008250:P-type ATPase, A domain	GO:0000166:nucleotide binding; Molecular Function;GO:0000287:magnesium ion binding; Molecular Function;GO:0004012:phospholipid-translocating ATPase activity; Molecular Function;GO:0005515:probable phospholipid-transporting atpase ih isoform a;GO:0005524:ATP binding; Molecular Function;GO:0005769:probable phospholipid-transporting atpase ih isoform a;GO:0005783:probable phospholipid-transporting a…
BKGENE17653	1			\	BKGENE17653	\	\	\	\	\	\	\	\	ATP2A2	47523128	ATP2A3	767992219	Atp2a3	254039660	ATP2A3	528994858	Atp2a3, SERCA3b, Serca3; ATPase, Ca++ transporting, ubiquitous (EC:3.6.3.8); K05853 Ca2+ transporting ATPase, sarcoplasmic/endoplasmic reticulum [EC:3.6.3.8]	Sarcoplasmic/endoplasmic reticulum calcium ATPase 3 OS=Mus musculus GN=Atp2a3 PE=2 SV=3	K9IW69_PIG Sarcoplasmic/endoplasmic reticulum calcium ATPase 3 isoform a OS=Sus scrofa GN=ATP2A3_tv1 PE=2 SV=1	IPR001757:Cation-transporting P-type ATPase	GO:0006812:cation transport; Biological Process;GO:0016021:integral to membrane; Cellular Component;GO:0019829:cation-transporting ATPase activity; Molecular Function;
HAGENE02714	9			LWGENE07089	BKGENE06313	BMGENE09103	HAGENE02714	JHGENE13109	LAGENE19687	MSGENE13234	PIGENE01777	\	TPGENE13985	\	\	ATP5C1	4885079	Atp5c1	568912066	ATP5C1	528972401	ATP5C1; ATP synthase, H+ transporting, mitochondrial F1 complex, gamma polypeptide 1; K02136 F-type H+-transporting ATPase subunit gamma	ATP synthase subunit gamma, mitochondrial OS=Bos taurus GN=ATP5C1 PE=1 SV=3	K9IZN0_DESRO ATP synthase subunit gamma OS=Desmodus rotundus PE=2 SV=1	IPR000131:ATPase, F1 complex, gamma subunit	GO:0015986:ATP synthesis coupled proton transport; Biological Process;GO:0045261:proton-transporting ATP synthase complex, catalytic core F(1); Cellular Component;GO:0046933:proton-transporting ATP synthase activity, rotational mechanism; Molecular Function;GO:0046961:proton-transporting ATPase activity, rotational mechanism; Molecular Function;
BMGENE13682	10			LWGENE17742	BKGENE18118	BMGENE13682	HAGENE12574	JHGENE03756	LAGENE11431	MSGENE10385	PIGENE00283	RCGENE01668	TPGENE09495	ATP5H	347658971	ATP5H	5453559	Atp5h	568975897	ATP5H	27807305	ATP5H; ATP synthase, H+ transporting, mitochondrial Fo complex, subunit d (EC:3.6.1.14); K02138 F-type H+-transporting ATPase subunit d	ATP synthase subunit d, mitochondrial OS=Bos taurus GN=ATP5H PE=1 SV=2	G1T9N2_RABIT Uncharacterized protein OS=Oryctolagus cuniculus GN=LOC100344371 PE=4 SV=1	IPR008689:ATPase, F0 complex, subunit D, mitochondrial	GO:0000276:mitochondrial proton-transporting ATP synthase complex, coupling factor F(o); Cellular Component;GO:0015078:hydrogen ion transmembrane transporter activity; Molecular Function;GO:0015986:ATP synthesis coupled proton transport; Biological Process;
HAGENE19890	10			LWGENE19631	BKGENE09387	BMGENE08048	HAGENE19890	JHGENE15942	LAGENE10401	MSGENE09121	PIGENE08437	RCGENE10200	TPGENE19123	ATP7A	311276546	ATP7B	530402452	Atp7b	116256507	ATP7B	297481055	ATP7B; ATPase, Cu++ transporting, beta polypeptide; K17686 Cu+-exporting ATPase [EC:3.6.3.54]	Copper-transporting ATPase 2 OS=Ovis aries GN=ATP7B PE=2 SV=1	D2H7F9_AILME Putative uncharacterized protein (Fragment) OS=Ailuropoda melanoleuca GN=PANDA_006078 PE=3 SV=1	IPR001757:Cation-transporting P-type ATPase;IPR006121:Heavy metal-associated domain, HMA;IPR008250:P-type ATPase, A domain;IPR023214:HAD-like domain	GO:0000166:nucleotide binding; Molecular Function;GO:0006812:cation transport; Biological Process;GO:0016021:integral to membrane; Cellular Component;GO:0019829:cation-transporting ATPase activity; Molecular Function;GO:0030001:metal ion transport; Biological Process;GO:0046872:metal ion binding; Molecular Function;
JHGENE20569	10			LWGENE20301	BKGENE20788	BMGENE05141	HAGENE20405	JHGENE20569	LAGENE20373	MSGENE03656	PIGENE20761	RCGENE20375	TPGENE19013	ATP8B2	311254204	ATP8B4	767985411	Atp8b4	568916983	ATP8B4	741940863	ATP8B4; ATPase, class I, type 8B, member 4; K01530 phospholipid-translocating ATPase [EC:3.6.3.1]	Probable phospholipid-transporting ATPase IM OS=Homo sapiens GN=ATP8B4 PE=2 SV=3	H0YL60_HUMAN Probable phospholipid-transporting ATPase IM (Fragment) OS=Homo sapiens GN=ATP8B4 PE=4 SV=1	IPR006539:Phospholipid-transporting P-type ATPase, subfamily IV	GO:0000287:magnesium ion binding; Molecular Function;GO:0004012:phospholipid-translocating ATPase activity; Molecular Function;GO:0005524:ATP binding; Molecular Function;GO:0006812:class type member isoform cra_a;GO:0015662:class type member isoform cra_a;GO:0015914:phospholipid transport; Biological Process;GO:0016021:integral to membrane; Cellular Component;
LWGENE14029	10			LWGENE14029	BKGENE05085	BMGENE15472	HAGENE18375	JHGENE16171	LAGENE15810	MSGENE16268	PIGENE01063	RCGENE07278	TPGENE18441	\	\	AURKAIP1	8923565	Aurkaip1	568931728	AURKAIP1	528980114	AURKAIP1; aurora kinase A interacting protein 1; K16830 aurora kinase A-interacting protein	Aurora kinase A-interacting protein OS=Homo sapiens GN=AURKAIP1 PE=1 SV=1	F1MIJ4_BOVIN Uncharacterized protein OS=Bos taurus GN=AURKAIP1 PE=4 SV=1	IPR013177:Domain of unknown function DUF1713, mitochondria	\
JHGENE12956	8			LWGENE16673	BKGENE12184	\	HAGENE05030	JHGENE12956	LAGENE16451	\	PIGENE15657	RCGENE02764	TPGENE19173	AURKB	47522646	AURKC	62865639	Aurkb	51317394	AURKB	741962895	AURKC; aurora kinase C; K11480 aurora kinase C [EC:2.7.11.1]	Aurora kinase C OS=Homo sapiens GN=AURKC PE=1 SV=1	F6XUG2_HORSE Uncharacterized protein OS=Equus caballus GN=AURKC PE=4 SV=1	IPR000719:Protein kinase domain;IPR002290:Serine/threonine- / dual specificity protein kinase, catalytic domain;IPR020635:Tyrosine-protein kinase, catalytic domain	GO:0000775:serine threonine-protein kinase 13-like isoform 1;GO:0000793:serine threonine-protein kinase 13-like isoform 1;GO:0004672:protein kinase activity; Molecular Function;GO:0004674:serine threonine-protein kinase 13-like isoform 1;GO:0004713:protein tyrosine kinase activity; Molecular Function;GO:0005524:ATP binding; Molecular Function;GO:0006468:protein phosphorylation; Biological Process…
TPGENE17025	1			\	\	\	\	\	\	\	\	\	TPGENE17025	LOC100525885	545851887	B3GALNT2	22749021	B3galnt2	568982128	B3GALNT2	741977884	B3GALNT2; beta-1,3-N-acetylgalactosaminyltransferase 2; K09654 beta-1,3-N-acetylgalactosaminyltransferase 2 [EC:2.4.1.-]	UDP-GalNAc:beta-1,3-N-acetylgalactosaminyltransferase 2 OS=Homo sapiens GN=B3GALNT2 PE=1 SV=1	G3SYQ4_LOXAF Uncharacterized protein OS=Loxodonta africana GN=B3GALNT2 PE=4 SV=1	IPR002659:Glycosyl transferase, family 31	GO:0005794:udp- c:beta- -n-acetylgalactosaminyltransferase 2;GO:0006486:protein glycosylation; Biological Process;GO:0008378:galactosyltransferase activity; Molecular Function;GO:0016020:membrane; Cellular Component;GO:0016021:udp- c:beta- -n-acetylgalactosaminyltransferase 2;
TPGENE03555	10			LWGENE16243	BKGENE16152	BMGENE05701	HAGENE01366	JHGENE00872	LAGENE18356	MSGENE04994	PIGENE19589	RCGENE00044	TPGENE03555	B4GALNT4	545889167	B4GALNT3	71043500	B4galnt3	755516982	B4GALNT3	331999975	B4GALNT3; beta-1,4-N-acetyl-galactosaminyl transferase 3; K09656 beta-1,4-N-acetylgalactosaminyltransferase 3 [EC:2.4.1.244]	Beta-1,4-N-acetylgalactosaminyltransferase 3 OS=Homo sapiens GN=B4GALNT3 PE=1 SV=2	F6ZWW1_HORSE Uncharacterized protein (Fragment) OS=Equus caballus GN=B4GALNT3 PE=4 SV=1	IPR008428:Chondroitin N-acetylgalactosaminyltransferase;IPR011658:PA14	GO:0016758:transferase activity, transferring hexosyl groups; Molecular Function;GO:0032580:Golgi cisterna membrane; Cellular Component;
BMGENE18783	10			LWGENE08082	BKGENE08188	BMGENE18783	HAGENE07362	JHGENE02585	LAGENE12366	MSGENE09760	PIGENE11842	RCGENE13895	TPGENE08360	LOC100520965	545834686	ADGRB1	767953374	Bai1	755550800	BAI1	741949430	BAI1; brain-specific angiogenesis inhibitor 1; K04596 brain-specific angiogenesis inhibitor 1	Brain-specific angiogenesis inhibitor 1 OS=Mus musculus GN=Bai1 PE=1 SV=1	G3X6K9_BOVIN Uncharacterized protein OS=Bos taurus GN=BAI1 PE=4 SV=1	IPR000203:GPS domain;IPR000832:GPCR, family 2, secretin-like;IPR000884:Thrombospondin, type 1 repeat;IPR001879:GPCR, family 2, extracellular hormone receptor domain;IPR008077:GPCR, family 2, brain-specific angiogenesis inhibitor;IPR017981:GPCR, family 2-like;IPR022624:Domain of unknown function DUF3497	GO:0004888:transmembrane signaling receptor activity; Molecular Function;GO:0004930:G-protein coupled receptor activity; Molecular Function;GO:0005886:brain-specific angiogenesis inhibitor 1 precursor;GO:0007166:cell surface receptor signaling pathway; Biological Process;GO:0007186:G-protein coupled receptor signaling pathway; Biological Process;GO:0007218:neuropeptide signaling pathway; Biologic…
BMGENE20739	10			LWGENE20559	BKGENE20659	BMGENE20739	HAGENE20599	JHGENE20383	LAGENE16543	MSGENE20464	PIGENE20482	RCGENE20323	TPGENE15753	BCMO1	211578376	BCO1	767989977	Bco1	11993946	BCO1	66792910	BCMO1; beta-carotene 15,15'-monooxygenase 1 (EC:1.14.99.36); K00515 beta-carotene 15,15'-monooxygenase [EC:1.14.99.36]	Beta,beta-carotene 15,15'-monooxygenase OS=Homo sapiens GN=BCMO1 PE=1 SV=1	B6UV63_PIG Beta-carotene 15,15'-monooxygenase 1 OS=Sus scrofa GN=BCMO1 PE=2 SV=1	IPR004294:Carotenoid oxygenase	GO:0001523:-carotene -monooxygenase;GO:0003834:-carotene -monooxygenase;
LWGENE17494	9			LWGENE17494	BKGENE08276	BMGENE18718	HAGENE02117	JHGENE18556	LAGENE07359	MSGENE15505	PIGENE13225	RCGENE08284	\	BHLHE22	350583145	BHLHE23	506326971	Bhlhe23	31542226	BHLHE23	741948478	BHLHE23, BHLHB4; basic helix-loop-helix family, member e23; K09086 class B basic helix-loop-helix protein 4/5	Class E basic helix-loop-helix protein 23 OS=Homo sapiens GN=BHLHE23 PE=2 SV=1	F1N4A3_BOVIN Uncharacterized protein OS=Bos taurus GN=BHLHE23 PE=4 SV=2	IPR011598:Myc-type, basic helix-loop-helix (bHLH) domain	GO:0045944:class e basic helix-loop-helix protein 23;GO:0046671:class e basic helix-loop-helix protein 23;GO:0046983:protein dimerization activity; Molecular Function;GO:0048050:class e basic helix-loop-helix protein 23;
LWGENE17496	5			LWGENE17496	\	BMGENE18720	HAGENE02119	\	LAGENE20102	\	PIGENE13223	\	\	BIRC3	545848264	BIRC7	11545910	Birc7	253735888	BIRC7	741949203	BIRC7; baculoviral IAP repeat containing 7; K16061 baculoviral IAP repeat-containing protein 7/8	Baculoviral IAP repeat-containing protein 7 OS=Homo sapiens GN=BIRC7 PE=1 SV=2	G3N2J3_BOVIN Uncharacterized protein (Fragment) OS=Bos taurus GN=BIRC7 PE=4 SV=1	IPR001370:Baculoviral inhibition of apoptosis protein repeat	GO:0043169:baculoviral iap repeat-containing protein 7 isoform 1;GO:0043231:baculoviral iap repeat-containing protein 7 isoform 1;GO:0044699:baculoviral iap repeat-containing protein 7 isoform 1;GO:0050794:baculoviral iap repeat-containing protein 7 isoform 1;
BMGENE20811	1			\	\	BMGENE20811	\	\	\	\	\	\	\	LOC100156099	545820015	SLA2	14149916	Sla2	568918876	SLA2	78369647	BLK; B lymphoid tyrosine kinase; K08890 B lymphoid tyrosine kinase [EC:2.7.10.2]	Src-like-adapter 2 OS=Homo sapiens GN=SLA2 PE=1 SV=3	Q5BIM7_BOVIN Src-like-adaptor 2 isoform a OS=Bos taurus GN=SLA2 PE=2 SV=1	IPR000980:SH2 domain;IPR001452:Src homology-3 domain	GO:0005515:protein binding; Molecular Function;
JHGENE20341	1			\	\	\	\	JHGENE20341	\	\	\	\	\	LOC100156099	545820015	SLA2	14149916	Sla2	568918876	SLA2	78369647	BLK; B lymphoid tyrosine kinase; K08890 B lymphoid tyrosine kinase [EC:2.7.10.2]	Src-like-adapter 2 OS=Homo sapiens GN=SLA2 PE=1 SV=3	Q5BIM7_BOVIN Src-like-adaptor 2 isoform a OS=Bos taurus GN=SLA2 PE=2 SV=1	IPR000980:SH2 domain;IPR001452:Src homology-3 domain	GO:0005515:protein binding; Molecular Function;
LAGENE20561	1			\	\	\	\	\	LAGENE20561	\	\	\	\	LOC100156099	545820015	SLA2	14149916	Sla2	568918876	SLA2	78369647	BLK; B lymphoid tyrosine kinase; K08890 B lymphoid tyrosine kinase [EC:2.7.10.2]	Src-like-adapter 2 OS=Homo sapiens GN=SLA2 PE=1 SV=3	Q5BIM7_BOVIN Src-like-adaptor 2 isoform a OS=Bos taurus GN=SLA2 PE=2 SV=1	IPR000980:SH2 domain;IPR001452:Src homology-3 domain	GO:0005515:protein binding; Molecular Function;
MSGENE20580	1			\	\	\	\	\	\	MSGENE20580	\	\	\	LOC100156099	545820015	SLA2	14149916	Sla2	568918876	SLA2	78369647	BLK; B lymphoid tyrosine kinase; K08890 B lymphoid tyrosine kinase [EC:2.7.10.2]	Src-like-adapter 2 OS=Homo sapiens GN=SLA2 PE=1 SV=3	Q5BIM7_BOVIN Src-like-adaptor 2 isoform a OS=Bos taurus GN=SLA2 PE=2 SV=1	IPR000980:SH2 domain;IPR001452:Src homology-3 domain	GO:0005515:protein binding; Molecular Function;
PIGENE20736	10			LWGENE05009	BKGENE20778	BMGENE15980	HAGENE07232	JHGENE00714	LAGENE12880	MSGENE07950	PIGENE20736	RCGENE19079	TPGENE04750	LOC100156099	545820015	SLA2	14149916	Sla2	568918876	SLA2	78369647	BLK; B lymphoid tyrosine kinase; K08890 B lymphoid tyrosine kinase [EC:2.7.10.2]	Src-like-adapter 2 OS=Homo sapiens GN=SLA2 PE=1 SV=3	Q5BIM7_BOVIN Src-like-adaptor 2 isoform a OS=Bos taurus GN=SLA2 PE=2 SV=1	IPR000980:SH2 domain;IPR001452:Src homology-3 domain	GO:0005515:protein binding; Molecular Function;
RCGENE20562	1			\	\	\	\	\	\	\	\	RCGENE20562	\	LOC100156099	545820015	SLA2	14149916	Sla2	568918876	SLA2	78369647	BLK; B lymphoid tyrosine kinase; K08890 B lymphoid tyrosine kinase [EC:2.7.10.2]	Src-like-adapter 2 OS=Homo sapiens GN=SLA2 PE=1 SV=3	Q5BIM7_BOVIN Src-like-adaptor 2 isoform a OS=Bos taurus GN=SLA2 PE=2 SV=1	IPR000980:SH2 domain;IPR001452:Src homology-3 domain	GO:0005515:protein binding; Molecular Function;
PIGENE06587	10			LWGENE16738	BKGENE19940	BMGENE17892	HAGENE10105	JHGENE17289	LAGENE13284	MSGENE00544	PIGENE06587	RCGENE01503	TPGENE18173	MTSS1L	545829313	MTSS1L	46195763	Mtss1l	568956828	MTSS1L	741957830	brain-specific angiogenesis inhibitor 1-associated protein 2-like; K05627 BAI1-associated protein 2	MTSS1-like protein OS=Homo sapiens GN=MTSS1L PE=1 SV=1	K7DCJ4_PANTR Metastasis suppressor 1-like OS=Pan troglodytes GN=MTSS1L PE=2 SV=1	IPR013606:IRSp53/MIM homology domain (IMD)	GO:0007165:signal transduction; Biological Process;GO:0008093:cytoskeletal adaptor activity; Molecular Function;GO:0017124:SH3 domain binding; Molecular Function;GO:0046847:filopodium assembly; Biological Process;
HAGENE17851	10			LWGENE10659	BKGENE08069	BMGENE14195	HAGENE17851	JHGENE14177	LAGENE19206	MSGENE05747	PIGENE00870	RCGENE08457	TPGENE19272	BRPF1	545863503	BRD1	756141031	Brd1	164698417	BRD1	741912617	BRD1; bromodomain containing 1; K11349 bromodomain-containing protein 1	Bromodomain-containing protein 1 OS=Homo sapiens GN=BRD1 PE=1 SV=1	L8I2I4_BOSMU Bromodomain-containing protein 1 OS=Bos grunniens mutus GN=M91_01405 PE=4 SV=1	IPR000313:PWWP domain;IPR001487:Bromodomain;IPR001965:Zinc finger, PHD-type;IPR019542:Enhancer of polycomb-like, N-terminal;IPR019787:Zinc finger, PHD-finger	GO:0005515:protein binding; Molecular Function;GO:0008270:zinc ion binding; Molecular Function;
LAGENE09067	10			LWGENE08337	BKGENE09461	BMGENE08428	HAGENE16409	JHGENE07283	LAGENE09067	MSGENE19701	PIGENE15483	RCGENE16639	TPGENE16212	BRD7	545894475	BRD9	237649104	Brd9	112817628	BRD9	300796945	BRD9; bromodomain containing 9; K11723 bromodomain-containing protein 7/9	Bromodomain-containing protein 9 OS=Homo sapiens GN=BRD9 PE=1 SV=2	K9IYX1_DESRO Putative irf-2-binding protein celtix-1 OS=Desmodus rotundus PE=2 SV=1	IPR001487:Bromodomain;IPR021900:Protein of unknown function DUF3512	GO:0005515:protein binding; Molecular Function;
RCGENE15018	9			LWGENE02786	BKGENE09613	BMGENE02128	HAGENE02774	JHGENE06227	LAGENE17560	MSGENE03501	PIGENE08495	RCGENE15018	\	MARK2	545806739	BRSK2	375298744	Brsk2	58036485	BRSK2	741905310	BRSK2, C11orf7, PEN11B, SAD1, SADA, STK29; BR serine/threonine kinase 2 (EC:2.7.11.1 2.7.11.26); K08796 BR serine/threonine kinase [EC:2.7.11.1]	Serine/threonine-protein kinase BRSK2 OS=Homo sapiens GN=BRSK2 PE=1 SV=3	F1MVZ2_BOVIN Uncharacterized protein (Fragment) OS=Bos taurus GN=BRSK2 PE=4 SV=2	IPR000719:Protein kinase domain;IPR002290:Serine/threonine- / dual specificity protein kinase, catalytic domain;IPR020635:Tyrosine-protein kinase, catalytic domain	GO:0000287:serine threonine-protein kinase brsk2;GO:0004672:protein kinase activity; Molecular Function;GO:0004674:serine threonine-protein kinase brsk2;GO:0004713:protein tyrosine kinase activity; Molecular Function;GO:0005524:ATP binding; Molecular Function;GO:0006468:protein phosphorylation; Biological Process;GO:0007409:serine threonine-protein kinase brsk2;GO:0018105:serine threonine-protein…
LWGENE11148	9			LWGENE11148	BKGENE14642	BMGENE11592	HAGENE09442	JHGENE18124	LAGENE01426	MSGENE18221	PIGENE14503	RCGENE11228	\	BTBD3	335304461	BTBD6	225543407	Btbd6	225543368	BTBD6	157280009	Btbd6; BTB (POZ) domain containing 6; K10478 BTB/POZ domain-containing protein 3/6	BTB/POZ domain-containing protein 6 OS=Mus musculus GN=Btbd6 PE=2 SV=2	G5E817_MOUSE BTB (POZ) domain containing 6, isoform CRA_b OS=Mus musculus GN=Btbd6 PE=4 SV=1	IPR000210:BTB/POZ-like;IPR011705:BTB/Kelch-associated;IPR012983:PHR;IPR013069:BTB/POZ	GO:0005515:protein binding; Molecular Function;GO:0005737:btb poz domain-containing protein 6 isoform 1;
HAGENE09033	1			\	\	\	HAGENE09033	\	\	\	\	\	\	LOC100621559	545882041	\	\	\	\	LOC789206	741924898	BV7-9; uncharacterized LOC100615597; K10785 T-cell receptor beta chain V region	T-cell receptor beta chain V region 86T1 OS=Mus musculus PE=2 SV=1	G1QDZ8_MYOLU Uncharacterized protein OS=Myotis lucifugus PE=4 SV=1	IPR003596:Immunoglobulin V-set, subgroup;IPR003599:Immunoglobulin subtype;IPR007110:Immunoglobulin-like domain;IPR013106:Immunoglobulin V-set domain	GO:0005515:protein binding; Molecular Function;
JHGENE08036	7			LWGENE09330	BKGENE08895	BMGENE20195	HAGENE09032	JHGENE08036	\	MSGENE02805	PIGENE10019	\	\	LOC100621559	545882041	\	\	\	\	LOC615948	741925191	BV7-9; uncharacterized LOC100615597; K10785 T-cell receptor beta chain V region	T-cell receptor beta chain V region CTL-L17 OS=Homo sapiens GN=TCRB PE=2 SV=1	H0VH94_CAVPO Uncharacterized protein OS=Cavia porcellus PE=4 SV=1	IPR003596:Immunoglobulin V-set, subgroup;IPR007110:Immunoglobulin-like domain;IPR013106:Immunoglobulin V-set domain	GO:0005515:protein binding; Molecular Function;
RCGENE18332	1			\	\	\	\	\	\	\	\	RCGENE18332	\	BYS1	195539480	BYSL	767940588	Bysl	164698440	BYSL	62460544	BYS1; bystin; K14797 essential nuclear protein 1	Bystin OS=Bos taurus GN=BYSL PE=2 SV=1	B4X981_PIG Bystin-like OS=Sus scrofa GN=bys1 PE=2 SV=1	IPR007955:Bystin	\
HAGENE15319	10			LWGENE15720	BKGENE05929	BMGENE09205	HAGENE15319	JHGENE04847	LAGENE13824	MSGENE12034	PIGENE02271	RCGENE03384	TPGENE02532	CA5B	545884178	CA5A	4502521	Car5a	112181175	CA5A	329112587	CA5A; carbonic anhydrase VA, mitochondrial; K01672 carbonic anhydrase [EC:4.2.1.1]	Carbonic anhydrase 5A, mitochondrial OS=Homo sapiens GN=CA5A PE=1 SV=1	E1BAD9_BOVIN Uncharacterized protein OS=Bos taurus GN=CA5A PE=4 SV=1	IPR001148:Alpha carbonic anhydrase;IPR018437:Carbonic anhydrase V, mitochondria;IPR023561:Carbonic anhydrase, alpha-class	GO:0004089:carbonate dehydratase activity; Molecular Function;GO:0005739:mitochondrion; Cellular Component;GO:0006730:carbonic anhydrase mitochondrial;GO:0008270:zinc ion binding; Molecular Function;GO:0046872:carbonic anhydrase mitochondrial;
BMGENE01318	10			LWGENE06520	BKGENE20696	BMGENE01318	HAGENE04914	JHGENE06942	LAGENE05677	MSGENE18210	PIGENE05726	RCGENE00152	TPGENE11616	CACNA1E	545851179	CACNA1B	767958227	Cacna1b	568912836	CACNA1B	27807135	CACNA1B; calcium channel, voltage-dependent, N type, alpha 1B subunit; K04849 voltage-dependent calcium channel N type alpha-1B	Voltage-dependent N-type calcium channel subunit alpha-1B OS=Homo sapiens GN=CACNA1B PE=1 SV=1	G3X7Z2_BOVIN Uncharacterized protein OS=Bos taurus GN=CACNA1B PE=3 SV=1	IPR002048:EF-hand domain;IPR002077:Voltage-dependent calcium channel, alpha-1 subunit;IPR005447:Voltage-dependent calcium channel, N-type, alpha-1 subunit;IPR005821:Ion transport domain;IPR014873:Voltage-dependent calcium channel, alpha-1 subunit, IQ domain	GO:0005216:ion channel activity; Molecular Function;GO:0005245:voltage-gated calcium channel activity; Molecular Function;GO:0005509:calcium ion binding; Molecular Function;GO:0005891:voltage-gated calcium channel complex; Cellular Component;GO:0006811:ion transport; Biological Process;GO:0007269:voltage-dependent n-type calcium channel subunit alpha-1b;GO:0007626:voltage-dependent n-type calcium…
BKGENE17672	10			LWGENE17559	BKGENE17672	BMGENE06666	HAGENE08074	JHGENE11090	LAGENE09989	MSGENE07636	PIGENE02954	RCGENE10142	TPGENE01853	\	\	\	\	\	\	LOC104970163	741909912	CACNB2; calcium channel, voltage-dependent, beta 2 subunit; K04863 voltage-dependent calcium channel beta-2	Voltage-dependent L-type calcium channel subunit beta-2 OS=Homo sapiens GN=CACNB2 PE=1 SV=3	\	\	\
MSGENE04396	3			LWGENE07712	\	\	\	\	\	MSGENE04396	\	\	TPGENE00982	CDH11	545829560	CDH8	530423505	Cdh8	85662400	CDH11	528990858	cadherin-8-like; K06800 cadherin 8, type 2	Cadherin-8 OS=Homo sapiens GN=CDH8 PE=1 SV=2	G1ME96_AILME Uncharacterized protein (Fragment) OS=Ailuropoda melanoleuca GN=CDH8 PE=3 SV=1	IPR000233:Cadherin, cytoplasmic domain;IPR002126:Cadherin	GO:0005509:calcium ion binding; Molecular Function;GO:0007156:homophilic cell adhesion; Biological Process;GO:0016020:membrane; Cellular Component;
TPGENE13663	8			LWGENE14664	BKGENE20219	BMGENE20321	HAGENE20151	\	LAGENE20140	MSGENE01513	PIGENE20212	\	TPGENE13663	LOC100517346	545835022	CAP2	5453593	Cap2	13385554	CAP2	149642913	CAP2; CAP, adenylate cyclase-associated protein, 2 (yeast); K17261 adenylyl cyclase-associated protein	Adenylyl cyclase-associated protein 2 OS=Pongo abelii GN=CAP2 PE=2 SV=1	F1N715_BOVIN Adenylyl cyclase-associated protein OS=Bos taurus GN=CAP2 PE=3 SV=2	IPR001837:Adenylate cyclase-associated CAP;IPR013992:Adenylate cyclase-associated CAP, N-terminal	GO:0003779:actin binding; Molecular Function;GO:0007010:cytoskeleton organization; Biological Process;
HAGENE00815	9			LWGENE01656	\	BMGENE19740	HAGENE00815	JHGENE03874	LAGENE10308	MSGENE20114	PIGENE11854	RCGENE08466	TPGENE20040	CAPN2	154147607	CAPN8	221554549	Capn8	224809586	CAPN2	198282013	CAPN8; calpain 8; K08577 calpain-8 [EC:3.4.22.-]	Calpain-8 OS=Homo sapiens GN=CAPN8 PE=2 SV=3	I3MFK2_SPETR Uncharacterized protein (Fragment) OS=Spermophilus tridecemlineatus GN=CAPN8 PE=4 SV=1	IPR001300:Peptidase C2, calpain, catalytic domain;IPR002048:EF-hand domain;IPR022682:Peptidase C2, calpain, large subunit, domain III;IPR022683:Peptidase C2, calpain, domain III;IPR022684:Peptidase C2, calpain family	GO:0004198:calcium-dependent cysteine-type endopeptidase activity; Molecular Function;GO:0005509:calcium ion binding; Molecular Function;GO:0005622:intracellular; Cellular Component;GO:0006508:proteolysis; Biological Process;
MSGENE20115	1			\	\	\	\	\	\	MSGENE20115	\	\	\	CAPN2	154147607	CAPN8	221554549	Capn8	224809586	CAPN2	198282013	CAPN8; calpain 8; K08577 calpain-8 [EC:3.4.22.-]	Calpain-8 OS=Homo sapiens GN=CAPN8 PE=2 SV=3	I3MFK2_SPETR Uncharacterized protein (Fragment) OS=Spermophilus tridecemlineatus GN=CAPN8 PE=4 SV=1	IPR001300:Peptidase C2, calpain, catalytic domain;IPR002048:EF-hand domain;IPR022682:Peptidase C2, calpain, large subunit, domain III;IPR022683:Peptidase C2, calpain, domain III;IPR022684:Peptidase C2, calpain family	GO:0004198:calcium-dependent cysteine-type endopeptidase activity; Molecular Function;GO:0005509:calcium ion binding; Molecular Function;GO:0005622:intracellular; Cellular Component;GO:0006508:proteolysis; Biological Process;
BKGENE14305	1			\	BKGENE14305	\	\	\	\	\	\	\	\	LOC100738786	545831039	CEACAM1	296317314	Ceacam3	568946107	LOC507167	741894467	carcinoembryonic antigen-related cell adhesion molecule 6-like; K06499 carcinoembryonic antigen-related cell adhesion molecule	Carcinoembryonic antigen-related cell adhesion molecule 6 OS=Homo sapiens GN=CEACAM6 PE=1 SV=3	Q6VAN6_BOVIN Carcinoembryonic antigen-related cell adhesion molecule 1 isoform 3S OS=Bos taurus GN=CEACAM1 PE=2 SV=1	IPR003598:Immunoglobulin subtype 2;IPR003599:Immunoglobulin subtype;IPR007110:Immunoglobulin-like domain;IPR013098:Immunoglobulin I-set;IPR013106:Immunoglobulin V-set domain	GO:0005515:protein binding; Molecular Function;
BMGENE14387	3			LWGENE14083	\	BMGENE14387	\	\	\	\	PIGENE13643	\	\	LOC100738786	545831039	CEACAM1	296317314	Ceacam1	85719301	LOC507167	741894467	carcinoembryonic antigen-related cell adhesion molecule 6-like; K06499 carcinoembryonic antigen-related cell adhesion molecule	Carcinoembryonic antigen-related cell adhesion molecule 6 OS=Homo sapiens GN=CEACAM6 PE=1 SV=3	Q6VAN8_BOVIN Carcinoembryonic antigen-related cell adhesion molecule 1 OS=Bos taurus GN=CEACAM1 PE=2 SV=1	IPR003598:Immunoglobulin subtype 2;IPR003599:Immunoglobulin subtype;IPR007110:Immunoglobulin-like domain;IPR013098:Immunoglobulin I-set;IPR013106:Immunoglobulin V-set domain	GO:0005515:protein binding; Molecular Function;
MSGENE14813	1			\	\	\	\	\	\	MSGENE14813	\	\	\	LOC100738786	545831039	CEACAM1	296317314	Ceacam3	568946107	LOC507167	741894467	carcinoembryonic antigen-related cell adhesion molecule 6-like; K06499 carcinoembryonic antigen-related cell adhesion molecule	Carcinoembryonic antigen-related cell adhesion molecule 6 OS=Homo sapiens GN=CEACAM6 PE=1 SV=3	Q6VAN6_BOVIN Carcinoembryonic antigen-related cell adhesion molecule 1 isoform 3S OS=Bos taurus GN=CEACAM1 PE=2 SV=1	IPR003598:Immunoglobulin subtype 2;IPR003599:Immunoglobulin subtype;IPR007110:Immunoglobulin-like domain;IPR013098:Immunoglobulin I-set;IPR013106:Immunoglobulin V-set domain	GO:0005515:protein binding; Molecular Function;
RCGENE20289	1			\	\	\	\	\	\	\	\	RCGENE20289	\	LOC100738786	545831039	CEACAM1	296317314	Ceacam1	85719301	LOC507167	741894467	carcinoembryonic antigen-related cell adhesion molecule 6-like; K06499 carcinoembryonic antigen-related cell adhesion molecule	Carcinoembryonic antigen-related cell adhesion molecule 6 OS=Homo sapiens GN=CEACAM6 PE=1 SV=3	Q6VAN6_BOVIN Carcinoembryonic antigen-related cell adhesion molecule 1 isoform 3S OS=Bos taurus GN=CEACAM1 PE=2 SV=1	IPR003598:Immunoglobulin subtype 2;IPR003599:Immunoglobulin subtype;IPR007110:Immunoglobulin-like domain;IPR013098:Immunoglobulin I-set;IPR013106:Immunoglobulin V-set domain	GO:0005515:protein binding; Molecular Function;
TPGENE02540	1			\	\	\	\	\	\	\	\	\	TPGENE02540	LOC100738786	545831039	CEACAM1	296317314	Ceacam1	85719301	LOC507167	741894467	carcinoembryonic antigen-related cell adhesion molecule 6-like; K06499 carcinoembryonic antigen-related cell adhesion molecule	Carcinoembryonic antigen-related cell adhesion molecule 6 OS=Homo sapiens GN=CEACAM6 PE=1 SV=3	Q6VAN8_BOVIN Carcinoembryonic antigen-related cell adhesion molecule 1 OS=Bos taurus GN=CEACAM1 PE=2 SV=1	IPR003598:Immunoglobulin subtype 2;IPR003599:Immunoglobulin subtype;IPR007110:Immunoglobulin-like domain;IPR013098:Immunoglobulin I-set;IPR013106:Immunoglobulin V-set domain	GO:0005515:protein binding; Molecular Function;
BKGENE08212	1			\	BKGENE08212	\	\	\	\	\	\	\	\	CARD10	545824821	CARD11	767945969	Card11	161086929	CARD11	529007436	CARD11; caspase recruitment domain family, member 11; K07367 caspase recruitment domain-containing protein 11	Caspase recruitment domain-containing protein 11 OS=Mus musculus GN=Card11 PE=1 SV=2	F6VU19_HORSE Uncharacterized protein (Fragment) OS=Equus caballus GN=CARD11 PE=4 SV=1	IPR001315:CARD domain	GO:0005515:protein binding; Molecular Function;GO:0005622:intracellular; Cellular Component;GO:0042981:regulation of apoptotic process; Biological Process;
TPGENE03865	10			LWGENE05363	BKGENE05368	BMGENE07148	HAGENE03511	JHGENE01508	LAGENE10697	MSGENE00620	PIGENE18407	RCGENE10776	TPGENE03865	CARD10	545824821	CARD10	51093861	Card10	259089427	CARD10	528950310	CARD11; caspase recruitment domain family, member 11; K07367 caspase recruitment domain-containing protein 11	Caspase recruitment domain-containing protein 10 OS=Homo sapiens GN=CARD10 PE=2 SV=2	F1MW90_BOVIN Uncharacterized protein OS=Bos taurus GN=CARD10 PE=4 SV=2	IPR001315:CARD domain	GO:0005515:protein binding; Molecular Function;GO:0005622:intracellular; Cellular Component;GO:0042981:regulation of apoptotic process; Biological Process;
TPGENE19824	10			LWGENE03593	BKGENE08213	BMGENE14873	HAGENE07463	JHGENE10550	LAGENE14209	MSGENE12349	PIGENE15039	RCGENE09334	TPGENE19824	CARD14	350590117	CARD11	767945967	Card11	161086929	CARD11	529007432	CARD11; caspase recruitment domain family, member 11; K07367 caspase recruitment domain-containing protein 11	Caspase recruitment domain-containing protein 11 OS=Homo sapiens GN=CARD11 PE=1 SV=3	F1PZC8_CANFA Uncharacterized protein OS=Canis familiaris GN=CARD11 PE=4 SV=2	IPR001315:CARD domain	GO:0005515:protein binding; Molecular Function;GO:0005622:intracellular; Cellular Component;GO:0042981:regulation of apoptotic process; Biological Process;
BKGENE11876	1			\	BKGENE11876	\	\	\	\	\	\	\	\	\	\	CASC1	578822928	Casc1	568944241	CASC1	114053315	CASC1; cancer susceptibility candidate 1; K17580 cancer susceptibility candidate protein 1	Cancer susceptibility candidate protein 1 homolog OS=Bos taurus GN=CASC1 PE=2 SV=1	G1LM06_AILME Uncharacterized protein (Fragment) OS=Ailuropoda melanoleuca GN=CASC1 PE=4 SV=1	IPR022110:Casc1 domain;IPR023247:Cancer susceptibility candidate protein 1	\
HAGENE02220	1			\	\	\	HAGENE02220	\	\	\	\	\	\	\	\	CASC1	578822928	Casc1	568944241	CASC1	114053315	CASC1; cancer susceptibility candidate 1; K17580 cancer susceptibility candidate protein 1	Cancer susceptibility candidate protein 1 homolog OS=Bos taurus GN=CASC1 PE=2 SV=1	G1LM06_AILME Uncharacterized protein (Fragment) OS=Ailuropoda melanoleuca GN=CASC1 PE=4 SV=1	IPR022110:Casc1 domain;IPR023247:Cancer susceptibility candidate protein 1	\
PIGENE07396	10			LWGENE05233	BKGENE20207	BMGENE11469	HAGENE20090	JHGENE20232	LAGENE20289	MSGENE05617	PIGENE07396	RCGENE11346	TPGENE20395	\	\	CASC1	131889097	Casc1	755518655	CASC1	114053315	CASC1; cancer susceptibility candidate 1; K17580 cancer susceptibility candidate protein 1	Cancer susceptibility candidate protein 1 homolog OS=Bos taurus GN=CASC1 PE=2 SV=1	G1LM06_AILME Uncharacterized protein (Fragment) OS=Ailuropoda melanoleuca GN=CASC1 PE=4 SV=1	IPR022110:Casc1 domain;IPR023247:Cancer susceptibility candidate protein 1	\
TPGENE06030	1			\	\	\	\	\	\	\	\	\	TPGENE06030	CBR1	47522960	CBR1	557948119	Cbr3	27413160	CBR1	77735973	CBR1, CBR, SDR21C1, hCBR1; carbonyl reductase 1 (EC:1.1.1.189 1.1.1.197 1.1.1.184); K00079 carbonyl reductase 1 [EC:1.1.1.184 1.1.1.189 1.1.1.197]	Carbonyl reductase [NADPH] 1 OS=Macaca fascicularis GN=CBR1 PE=2 SV=1	K7CXK0_PANTR Carbonyl reductase 1 OS=Pan troglodytes GN=CBR1 PE=2 SV=1	IPR002198:Short-chain dehydrogenase/reductase SDR;IPR002347:Glucose/ribitol dehydrogenase	GO:0008152:metabolic process; Biological Process;GO:0016491:oxidoreductase activity; Molecular Function;
BMGENE20520	8			LWGENE20200	BKGENE20427	BMGENE20520	HAGENE20404	JHGENE20500	\	MSGENE20566	\	RCGENE20187	TPGENE07542	CBR1	47522960	CBR1	4502599	Cbr1	113680352	CBR1	77735973	CBR1; carbonyl reductase 1 (EC:1.1.1.189 1.1.1.197 1.1.1.184); K00079 carbonyl reductase 1 [EC:1.1.1.184 1.1.1.189 1.1.1.197]	Carbonyl reductase [NADPH] 1 OS=Sus scrofa GN=CBR1 PE=1 SV=3	I3RWJ1_PIG Carbonyl reductase 1 OS=Sus scrofa GN=CBR1 PE=3 SV=1	IPR002198:Short-chain dehydrogenase/reductase SDR;IPR002347:Glucose/ribitol dehydrogenase	GO:0000166:carbonyl reductase;GO:0004090:carbonyl reductase;GO:0005737:carbonyl reductase;GO:0008152:metabolic process; Biological Process;GO:0016491:oxidoreductase activity; Molecular Function;GO:0017144:carbonyl reductase;GO:0042373:carbonyl reductase;GO:0047021:carbonyl reductase;GO:0050221:carbonyl reductase;
LAGENE19621	1			\	\	\	\	\	LAGENE19621	\	\	\	\	CBR1	47522960	CBR1	4502599	Cbr1	113680352	CBR1	77735973	CBR1; carbonyl reductase 1 (EC:1.1.1.189 1.1.1.197 1.1.1.184); K00079 carbonyl reductase 1 [EC:1.1.1.184 1.1.1.189 1.1.1.197]	Carbonyl reductase [NADPH] 1 OS=Sus scrofa GN=CBR1 PE=1 SV=3	I3RWJ1_PIG Carbonyl reductase 1 OS=Sus scrofa GN=CBR1 PE=3 SV=1	IPR002347:Glucose/ribitol dehydrogenase	GO:0000166:achain crystal structure of porcine testicular carbonyl reductase 20beta-hydroxysteroid dehydrogenase;GO:0004090:achain crystal structure of porcine testicular carbonyl reductase 20beta-hydroxysteroid dehydrogenase;GO:0005737:achain crystal structure of porcine testicular carbonyl reductase 20beta-hydroxysteroid dehydrogenase;GO:0017144:achain crystal structure of porcine testicular ca…
JHGENE02748	6			LWGENE17870	\	BMGENE13355	HAGENE12704	JHGENE02748	LAGENE10965	\	\	RCGENE08787	\	CBR2	47523198	DCXR	7705925	Cbr2	6671688	DCXR	741964490	CBR2; carbonyl reductase 2 (EC:1.1.1.184); K00081 carbonyl reductase 2 [EC:1.1.1.184]	Carbonyl reductase [NADPH] 2 OS=Sus scrofa GN=CBR2 PE=1 SV=1	G3N1E7_BOVIN L-xylulose reductase OS=Bos taurus GN=DCXR PE=3 SV=1	IPR002198:Short-chain dehydrogenase/reductase SDR;IPR002347:Glucose/ribitol dehydrogenase	GO:0000166:carbonyl reductase;GO:0004090:carbonyl reductase;GO:0005759:carbonyl reductase;GO:0008152:metabolic process; Biological Process;GO:0016491:oxidoreductase activity; Molecular Function;
MSGENE13752	10			LWGENE17869	BKGENE06007	BMGENE13354	HAGENE12703	JHGENE02747	LAGENE20528	MSGENE13752	PIGENE08268	RCGENE08786	TPGENE12161	CBR2	47523198	DCXR	7705925	Cbr2	6671688	DCXR	741964490	CBR2; carbonyl reductase 2 (EC:1.1.1.184); K00081 carbonyl reductase 2 [EC:1.1.1.184]	Carbonyl reductase [NADPH] 2 OS=Sus scrofa GN=CBR2 PE=1 SV=1	G3N1E7_BOVIN L-xylulose reductase OS=Bos taurus GN=DCXR PE=3 SV=1	IPR002198:Short-chain dehydrogenase/reductase SDR;IPR002347:Glucose/ribitol dehydrogenase	GO:0000166:carbonyl reductase;GO:0004090:carbonyl reductase;GO:0005759:carbonyl reductase;GO:0008152:metabolic process; Biological Process;GO:0016491:oxidoreductase activity; Molecular Function;
JHGENE04132	10			LWGENE18985	BKGENE20121	BMGENE17966	HAGENE19923	JHGENE04132	LAGENE00164	MSGENE11786	PIGENE05795	RCGENE14099	TPGENE14051	LOC100621245	545894715	DBN1	530380877	Dbn1	34328251	DBN1	114052300	Cbr-tag-327; C. briggsae CBR-TAG-327 protein; K05760 paxillin	Drebrin OS=Homo sapiens GN=DBN1 PE=1 SV=4	Q1RMT6_BOVIN Drebrin 1 OS=Bos taurus GN=DBN1 PE=2 SV=1	IPR001478:PDZ domain;IPR001781:Zinc finger, LIM-type;IPR002108:Actin-binding, cofilin/tropomyosin type	GO:0003779:actin binding; Molecular Function;GO:0005515:protein binding; Molecular Function;GO:0005622:intracellular; Cellular Component;GO:0007015:drebrin 1;GO:0008270:zinc ion binding; Molecular Function;GO:0015629:drebrin 1;GO:0048699:drebrin 1;GO:0061351:drebrin 1;
RCGENE08027	10			LWGENE18315	BKGENE13037	BMGENE12990	HAGENE05904	JHGENE01028	LAGENE15026	MSGENE01959	PIGENE20000	RCGENE08027	TPGENE16247	U2AF1L4	311257402	LOC102724560	768019774	Cbs	405778333	CBS	156120647	CBS; cystathionine-beta-synthase; K01697 cystathionine beta-synthase [EC:4.2.1.22]	Cystathionine beta-synthase OS=Macaca fascicularis GN=CBS PE=2 SV=3	M3W1B1_FELCA Uncharacterized protein OS=Felis catus GN=CBS PE=4 SV=1	IPR000504:RNA recognition motif domain;IPR000571:Zinc finger, CCCH-type;IPR000644:CBS domain;IPR001926:Tryptophan synthase beta subunit-like PLP-dependent enzymes superfamily;IPR003954:RNA recognition motif domain, eukaryote;IPR009145:U2 auxiliary factor small subunit	GO:0003676:nucleic acid binding; Molecular Function;GO:0003723:RNA binding; Molecular Function;GO:0005634:nucleus; Cellular Component;GO:0030554:adenyl nucleotide binding; Molecular Function;GO:0046872:metal ion binding; Molecular Function;
JHGENE01544	10			LWGENE05402	BKGENE13812	BMGENE07112	HAGENE07578	JHGENE01544	LAGENE10658	MSGENE06360	PIGENE18369	RCGENE10812	TPGENE11643	CBX8	347300239	CBX6	768024033	Cbx6	61657984	CBX6	156718118	CBX6; chromobox homolog 6; K11453 chromobox protein 6	Chromobox protein homolog 6 OS=Mus musculus GN=Cbx6 PE=2 SV=2	E2RL70_CANFA Uncharacterized protein OS=Canis familiaris GN=NPTXR PE=4 SV=2	IPR000953:Chromo domain/shadow;IPR023780:Chromo domain	\
BMGENE03930	7			LWGENE18007	BKGENE07959	BMGENE03930	\	\	LAGENE20002	MSGENE14657	PIGENE12525	\	TPGENE08237	LOC100624374	545859098	HEATR6	109715835	Heatr6	124249080	HEATR6	741962136	c-C motif chemokine 3-like; K05408 C-C motif chemokine 3	HEAT repeat-containing protein 6 OS=Homo sapiens GN=HEATR6 PE=1 SV=1	F6UHT9_HORSE Uncharacterized protein (Fragment) OS=Equus caballus GN=HEATR6 PE=4 SV=1	IPR000737:Proteinase inhibitor I7, squash;IPR008197:Whey acidic protein-type 4-disulphide core;IPR025283:Domain of unknown function DUF4042	GO:0004867:serine-type endopeptidase inhibitor activity; Molecular Function;GO:0005576:extracellular region; Cellular Component;GO:0030414:peptidase inhibitor activity; Molecular Function;
JHGENE18239	8			LWGENE04469	BKGENE09737	\	HAGENE10041	JHGENE18239	LAGENE08865	\	PIGENE19004	RCGENE14628	TPGENE08734	LOC100624374	545859098	HEATR6	109715835	Heatr6	124249080	HEATR6	741962136	c-C motif chemokine 3-like; K05408 C-C motif chemokine 3	HEAT repeat-containing protein 6 OS=Homo sapiens GN=HEATR6 PE=1 SV=1	F6UHT9_HORSE Uncharacterized protein (Fragment) OS=Equus caballus GN=HEATR6 PE=4 SV=1	IPR000737:Proteinase inhibitor I7, squash;IPR008197:Whey acidic protein-type 4-disulphide core;IPR025283:Domain of unknown function DUF4042	GO:0004867:serine-type endopeptidase inhibitor activity; Molecular Function;GO:0005576:extracellular region; Cellular Component;GO:0030414:peptidase inhibitor activity; Molecular Function;
LWGENE20674	10			LWGENE20674	BKGENE20830	BMGENE20905	HAGENE20827	JHGENE20821	LAGENE20771	MSGENE20873	PIGENE20824	RCGENE20636	TPGENE20452	PNMA1	545842260	PNMA5	296531422	Pnma5	755565542	PNMA5	529013997	CCDC8; coiled-coil domain containing 8; K17561 coiled-coil domain-containing protein 8	Paraneoplastic antigen-like protein 5 OS=Homo sapiens GN=PNMA5 PE=2 SV=2	F7D322_HORSE Uncharacterized protein OS=Equus caballus GN=PNMA5 PE=4 SV=1	IPR026523:Paraneoplastic antigen Ma;IPR026527:Paraneoplastic antigen-like protein 5	\
HAGENE02746	10			LWGENE11887	BKGENE16123	BMGENE11442	HAGENE02746	JHGENE17086	LAGENE14530	MSGENE10115	PIGENE16360	RCGENE07790	TPGENE01929	CD163	47522778	CD163	344179110	Cd163	281371423	CD163	741927820	CD163; CD163 molecule; K06545 CD163 antigen	Scavenger receptor cysteine-rich type 1 protein M130 OS=Sus scrofa GN=CD163 PE=1 SV=1	J9T9K7_PIG CD163 protein OS=Sus scrofa GN=CD163 PE=2 SV=1	IPR001190:SRCR domain;IPR017448:Speract/scavenger receptor-related	GO:0005044:scavenger receptor activity; Molecular Function;GO:0005576:cd163 protein;GO:0005886:cd163 protein;GO:0006953:cd163 protein;GO:0016020:membrane; Cellular Component;GO:0016021:cd163 protein;GO:0019048:cd163 protein;
LWGENE11056	10			LWGENE11056	BKGENE13916	BMGENE11934	HAGENE11788	JHGENE11225	LAGENE02756	MSGENE03298	PIGENE13412	RCGENE11503	TPGENE03020	LRP8	545836057	CD320	7706111	Cd320	88853588	CD320	262118238	CD320; CD320 molecule; K06734 CD320 antigen	CD320 antigen OS=Bos taurus GN=CD320 PE=2 SV=2	M1EGT5_MUSPF CD320 molecule (Fragment) OS=Mustela putorius furo PE=2 SV=1	IPR002172:Low-density lipoprotein (LDL) receptor class A repeat	GO:0005515:protein binding; Molecular Function;
BKGENE13365	9			LWGENE07158	BKGENE13365	BMGENE05583	HAGENE16980	JHGENE04983	LAGENE17654	\	PIGENE12412	RCGENE18968	TPGENE09235	CD46	47522706	CD46	27502423	Cd46	568911963	CD46	528980895	CD46, MCP; CD46 molecule, complement regulatory protein; K04007 membrane cofactor protein	Membrane cofactor protein OS=Sus scrofa GN=CD46 PE=1 SV=1	F1N4W5_BOVIN Membrane cofactor protein OS=Bos taurus GN=CD46 PE=2 SV=2	IPR000436:Sushi/SCR/CCP	GO:0002079:membrane cofactor protein precursor;GO:0006958:membrane cofactor protein precursor;GO:0007338:membrane cofactor protein precursor;GO:0016021:membrane cofactor protein precursor;GO:0045087:membrane cofactor protein precursor;
LAGENE17873	10			LWGENE13598	BKGENE00054	BMGENE12661	HAGENE01912	JHGENE11690	LAGENE17873	MSGENE10127	PIGENE15650	RCGENE06436	TPGENE02061	\	\	XG	213688346	\	\	XG	741983951	CD99 antigen-like protein 2-like; K06520 CD99 antigen	Glycoprotein Xg OS=Homo sapiens GN=XG PE=2 SV=1	G3N0Z4_BOVIN Uncharacterized protein OS=Bos taurus PE=4 SV=1	IPR022078:CD99 antigen-like protein 2	GO:0005887:unnamed protein product [Homo sapiens];
LAGENE03411	10			LWGENE12193	BKGENE08784	BMGENE16944	HAGENE03640	JHGENE12268	LAGENE03411	MSGENE11399	PIGENE10219	RCGENE07578	TPGENE13326	\	\	CDCA8	8922438	Cdca8	227116268	CDCA8	139947520	CDCA8; cell division cycle associated 8; K11514 Borealin	Borealin OS=Pongo abelii GN=CDCA8 PE=2 SV=1	M3WA68_FELCA Uncharacterized protein OS=Felis catus GN=CDCA8 PE=4 SV=1	IPR018851:Borealin-like, N-terminal;IPR018867:Cell division protein borealin	\
BKGENE06808	10			LWGENE16569	BKGENE06808	BMGENE04173	HAGENE05264	JHGENE06017	LAGENE03141	MSGENE17364	PIGENE02799	RCGENE16215	TPGENE05069	CDH11	545829560	CDH8	530423505	Cdh8	85662400	CDH11	528990858	CDH8; cadherin 8, type 2; K06800 cadherin 8, type 2	Cadherin-8 OS=Homo sapiens GN=CDH8 PE=1 SV=2	M3WCR4_FELCA Uncharacterized protein OS=Felis catus GN=CDH8 PE=3 SV=1	IPR000233:Cadherin, cytoplasmic domain;IPR002126:Cadherin	GO:0005509:calcium ion binding; Molecular Function;GO:0007156:homophilic cell adhesion; Biological Process;GO:0016020:membrane; Cellular Component;
HAGENE19451	10			LWGENE06004	BKGENE17389	BMGENE00175	HAGENE19451	JHGENE00912	LAGENE04178	MSGENE01619	PIGENE07566	RCGENE00145	TPGENE04767	CDK17	335288854	CDK18	47078231	Cdk18	6679233	CDK18	528979164	CDK18; cyclin-dependent kinase 18; K15596 cyclin-dependent kinase 18 [EC:2.7.11.22]	Cyclin-dependent kinase 18 OS=Pongo abelii GN=CDK18 PE=2 SV=2	M3YKG7_MUSPF Uncharacterized protein OS=Mustela putorius furo GN=CDK18 PE=4 SV=1	IPR000719:Protein kinase domain;IPR002290:Serine/threonine- / dual specificity protein kinase, catalytic domain;IPR020635:Tyrosine-protein kinase, catalytic domain	GO:0004672:protein kinase activity; Molecular Function;GO:0004713:protein tyrosine kinase activity; Molecular Function;GO:0005524:ATP binding; Molecular Function;GO:0006468:protein phosphorylation; Biological Process;
RCGENE16240	7			LWGENE20131	BKGENE20292	BMGENE20462	HAGENE20245	\	LAGENE15862	\	PIGENE20268	RCGENE16240	\	LOC102166418	545817930	CDKL1	532691778	Cdkl1	34304105	CDKL1	741940352	CDKL1; cyclin-dependent kinase-like 1 (CDC2-related kinase); K08824 cyclin-dependent kinase-like [EC:2.7.11.22]	Cyclin-dependent kinase-like 1 OS=Mus musculus GN=Cdkl1 PE=2 SV=1	J9NTE6_CANFA Uncharacterized protein OS=Canis familiaris GN=CDKL1 PE=4 SV=1	IPR000719:Protein kinase domain;IPR002290:Serine/threonine- / dual specificity protein kinase, catalytic domain	GO:0004672:protein kinase activity; Molecular Function;GO:0005524:ATP binding; Molecular Function;GO:0006468:protein phosphorylation; Biological Process;
HAGENE20459	10			LWGENE08984	BKGENE20671	BMGENE20568	HAGENE20459	JHGENE20351	LAGENE20389	MSGENE20696	PIGENE15916	RCGENE08520	TPGENE17667	CELA2A	47523026	CELA3B	767903469	Cela3b	755475803	CELA3B	262073098	CELA3B; chymotrypsin-like elastase family, member 3B; K01345 pancreatic endopeptidase E [EC:3.4.21.70]	Proproteinase E OS=Bos taurus PE=1 SV=2	F1PI75_CANFA Uncharacterized protein (Fragment) OS=Canis familiaris GN=CELA3B PE=3 SV=2	IPR001254:Peptidase S1;IPR001314:Peptidase S1A, chymotrypsin-type	GO:0004252:serine-type endopeptidase activity; Molecular Function;GO:0006508:proteolysis; Biological Process;
HAGENE19198	10			LWGENE15957	BKGENE01903	BMGENE00880	HAGENE19198	JHGENE02191	LAGENE06458	MSGENE11106	PIGENE10599	RCGENE09528	TPGENE14290	POC1A	545862709	WDR53	767926624	Wdr53	568996126	WDR53	115495021	cellulose synthase A catalytic subunit 8 [UDP-forming]-like; K10999 cellulose synthase A [EC:2.4.1.12]	WD repeat-containing protein 53 OS=Bos taurus GN=WDR53 PE=2 SV=1	L5L2V6_PTEAL WD repeat-containing protein 53 OS=Pteropus alecto GN=PAL_GLEAN10007371 PE=4 SV=1	IPR001680:WD40 repeat;IPR017986:WD40-repeat-containing domain	GO:0005515:protein binding; Molecular Function;
MSGENE05865	10			LWGENE10663	BKGENE02051	BMGENE07881	HAGENE07482	JHGENE04076	LAGENE19202	MSGENE05865	PIGENE00874	RCGENE05014	TPGENE00733	CELSR3	545862313	CELSR1	578837544	Celsr1	568991234	CELSR1	741878623	CELSR1; cadherin, EGF LAG seven-pass G-type receptor 1; K04600 cadherin EGF LAG seven-pass G-type receptor 1	Cadherin EGF LAG seven-pass G-type receptor 1 OS=Mus musculus GN=Celsr1 PE=2 SV=3	H0WXQ4_OTOGA Uncharacterized protein OS=Otolemur garnettii GN=CELSR1 PE=4 SV=1	IPR000203:GPS domain;IPR000742:Epidermal growth factor-like domain;IPR000832:GPCR, family 2, secretin-like;IPR001791:Laminin G domain;IPR001879:GPCR, family 2, extracellular hormone receptor domain;IPR001881:EGF-like calcium-binding domain;IPR002049:EGF-like, laminin;IPR002126:Cadherin;IPR022624:Domain of unknown function DUF3497	GO:0004930:G-protein coupled receptor activity; Molecular Function;GO:0005509:calcium ion binding; Molecular Function;GO:0005515:protein binding; Molecular Function;GO:0005886:cadherin egf lag seven-pass g-type receptor 1;GO:0007156:homophilic cell adhesion; Biological Process;GO:0007186:G-protein coupled receptor signaling pathway; Biological Process;GO:0007218:neuropeptide signaling pathway; Bi…
LAGENE00343	10			LWGENE13062	BKGENE06273	BMGENE19415	HAGENE16773	JHGENE19613	LAGENE00343	MSGENE04806	PIGENE12578	RCGENE14203	TPGENE03417	CELSR3	545862313	CELSR2	13325064	Celsr2	114050895	CELSR2	300793712	CELSR2; cadherin, EGF LAG seven-pass G-type receptor 2; K04601 cadherin EGF LAG seven-pass G-type receptor 2	Cadherin EGF LAG seven-pass G-type receptor 2 OS=Homo sapiens GN=CELSR2 PE=2 SV=1	E2R4F0_CANFA Uncharacterized protein OS=Canis familiaris GN=CELSR2 PE=4 SV=1	IPR000203:GPS domain;IPR000742:Epidermal growth factor-like domain;IPR000832:GPCR, family 2, secretin-like;IPR001791:Laminin G domain;IPR001879:GPCR, family 2, extracellular hormone receptor domain;IPR001881:EGF-like calcium-binding domain;IPR002049:EGF-like, laminin;IPR002126:Cadherin;IPR017981:GPCR, family 2-like;IPR022624:Domain of unknown function DUF3497	GO:0001764:cadherin egf lag seven-pass g-type receptor 2 isoform 1;GO:0004888:transmembrane signaling receptor activity; Molecular Function;GO:0004930:G-protein coupled receptor activity; Molecular Function;GO:0005509:calcium ion binding; Molecular Function;GO:0005515:protein binding; Molecular Function;GO:0005886:cadherin egf lag seven-pass g-type receptor 2 isoform 1;GO:0007156:homophilic cell …
LWGENE04331	10			LWGENE04331	BKGENE10117	BMGENE19578	HAGENE00461	JHGENE16618	LAGENE11905	MSGENE06217	PIGENE08854	RCGENE16384	TPGENE10855	TIGD4	47523416	TIGD4	767931336	Tigd4	46402305	TIGD4	741892365	CENPB; centromere protein B, 80kDa; K11496 centromere protein B	Tigger transposable element-derived protein 4 OS=Homo sapiens GN=TIGD4 PE=1 SV=2	F7AYM3_HORSE Uncharacterized protein OS=Equus caballus GN=TIGD4 PE=4 SV=1	IPR004875:DDE superfamily endonuclease, CENP-B-like;IPR006600:HTH CenpB-type DNA-binding domain;IPR007889:DNA binding HTH domain, Psq-type	GO:0003676:nucleic acid binding; Molecular Function;GO:0003677:DNA binding; Molecular Function;
LWGENE14117	10			LWGENE14117	BKGENE19313	BMGENE03462	HAGENE06674	JHGENE13890	LAGENE13035	MSGENE11376	PIGENE11769	RCGENE12272	TPGENE20086	CENPB	545879726	CENPB	21735415	Cenpb	34328105	CENPB	528974834	CENPB; centromere protein B, 80kDa; K11496 centromere protein B	Major centromere autoantigen B OS=Homo sapiens GN=CENPB PE=1 SV=2	L8YCZ0_TUPCH Major centromere autoantigen B OS=Tupaia chinensis GN=TREES_T100018090 PE=4 SV=1	IPR004875:DDE superfamily endonuclease, CENP-B-like;IPR006600:HTH CenpB-type DNA-binding domain;IPR007889:DNA binding HTH domain, Psq-type;IPR015115:Centromere protein CENP-B, dimerisation domain	GO:0000775:chromosome, centromeric region; Cellular Component;GO:0003676:nucleic acid binding; Molecular Function;GO:0003677:DNA binding; Molecular Function;GO:0003682:chromatin binding; Molecular Function;GO:0005634:nucleus; Cellular Component;GO:0006355:regulation of transcription, DNA-dependent; Biological Process;
TPGENE15758	10			LWGENE15669	BKGENE13609	BMGENE03858	HAGENE11353	JHGENE03223	LAGENE16539	MSGENE03664	PIGENE05667	RCGENE07922	TPGENE15758	\	\	CENPN	578829087	Cenpn	568957610	CENPN	528990083	CENPN; centromere protein N; K11506 centromere protein N	Centromere protein N OS=Bos taurus GN=CENPN PE=2 SV=1	F6TTV5_HORSE Uncharacterized protein OS=Equus caballus GN=CENPN PE=4 SV=1	IPR007902:Centromere protein Chl4/mis15/CENP-N;IPR027715:Centromere protein N	GO:0000775:chromosome, centromeric region; Cellular Component;GO:0007059:chromosome segregation; Biological Process;GO:0007067:mitosis; Biological Process;GO:0034508:centromere complex assembly; Biological Process;
JHGENE10196	10			LWGENE01624	BKGENE06245	BMGENE00672	HAGENE01593	JHGENE10196	LAGENE04407	MSGENE00214	PIGENE14076	RCGENE02335	TPGENE08822	CEP44	350592349	CEP44	530378224	Cep44	57977302	CEP44	741934889	CEP44; centrosomal protein 44kDa; K16761 centrosomal protein CEP44	Centrosomal protein of 44 kDa OS=Bos taurus GN=CEP44 PE=2 SV=1	L8ISA2_BOSMU Uncharacterized protein (Fragment) OS=Bos grunniens mutus GN=M91_19228 PE=4 SV=1	\	\
JHGENE00154	10			LWGENE20299	BKGENE01572	BMGENE04507	HAGENE03159	JHGENE00154	LAGENE20493	MSGENE16116	PIGENE12672	RCGENE19502	TPGENE17361	CER1	545803153	CER1	4885135	Cer1	6753410	CER1	76624191	CER1; cerberus 1, DAN family BMP antagonist; K01645 cerberus 1	Cerberus OS=Homo sapiens GN=CER1 PE=1 SV=1	L8J0A0_BOSMU Cerberus OS=Bos grunniens mutus GN=M91_00271 PE=4 SV=1	IPR004133:DAN;IPR006207:Cystine knot, C-terminal	\
LAGENE19204	10			LWGENE10661	BKGENE02049	BMGENE07879	HAGENE07480	JHGENE18686	LAGENE19204	MSGENE05867	PIGENE00872	RCGENE05016	TPGENE00731	CERKL	545874905	CERK	20336726	Cerk	62899061	CERK	741928914	CERK, LK4, dA59H18.2, dA59H18.3, hCERK; ceramide kinase (EC:2.7.1.138); K04715 ceramide kinase [EC:2.7.1.138]	Ceramide kinase OS=Homo sapiens GN=CERK PE=1 SV=1	M3VH84_PIG Ceramide kinase OS=Sus scrofa GN=CERK PE=2 SV=1	IPR001206:Diacylglycerol kinase, catalytic domain	GO:0000287:ceramide kinase;GO:0001729:ceramide kinase;GO:0004143:diacylglycerol kinase activity; Molecular Function;GO:0005524:ceramide kinase;GO:0005543:ceramide kinase;GO:0005634:ceramide kinase;GO:0005739:ceramide kinase;GO:0005886:ceramide kinase;GO:0006644:ceramide kinase;GO:0006672:ceramide kinase;GO:0006687:ceramide kinase;GO:0007205:protein kinase C-activating G-protein coupled receptor s…
MSGENE20858	6			LWGENE20696	BKGENE20823	\	\	\	LAGENE20742	MSGENE20858	\	RCGENE20601	TPGENE20421	CFH	47523636	CFHR2	5031695	Cfhr1	7656969	LOC519737	297484447	CFH, HF1; complement factor H (EC:4.2.1.2); K04004 complement factor H	Complement factor H-related protein 2 OS=Homo sapiens GN=CFHR2 PE=1 SV=1	F7E2N9_HORSE Uncharacterized protein OS=Equus caballus GN=CFHR5 PE=4 SV=1	IPR000436:Sushi/SCR/CCP	\
TPGENE00586	10			LWGENE02117	BKGENE01516	BMGENE12878	HAGENE05699	JHGENE08483	LAGENE10617	MSGENE18378	PIGENE01215	RCGENE02687	TPGENE00586	CHD7	335286466	CHD9	767990589	Chd9	755526280	CHD9	741958400	CHD9; chromodomain helicase DNA binding protein 9; K14438 chromodomain-helicase-DNA-binding protein 9 [EC:3.6.4.12]	Chromodomain-helicase-DNA-binding protein 9 OS=Homo sapiens GN=CHD9 PE=1 SV=2	G1MCV0_AILME Uncharacterized protein OS=Ailuropoda melanoleuca GN=CHD9 PE=4 SV=1	IPR000330:SNF2-related;IPR000953:Chromo domain/shadow;IPR001650:Helicase, C-terminal;IPR006576:BRK domain;IPR014001:Helicase, superfamily 1/2, ATP-binding domain;IPR023780:Chromo domain	GO:0003676:nucleic acid binding; Molecular Function;GO:0003677:DNA binding; Molecular Function;GO:0004386:helicase activity; Molecular Function;GO:0005515:protein binding; Molecular Function;GO:0005524:ATP binding; Molecular Function;GO:0005634:hypothetical protein PANDA_000001 [Ailuropoda melanoleuca];GO:0016817:hydrolase activity, acting on acid anhydrides; Molecular Function;
LAGENE18484	10			LWGENE10984	BKGENE01703	BMGENE09854	HAGENE20159	JHGENE05147	LAGENE18484	MSGENE02415	PIGENE06028	RCGENE14872	TPGENE14329	CHEK2	212549663	CHEK2	6005850	Chek2	7710088	CHEK2	77736009	CHEK2; checkpoint kinase 2 (EC:2.7.11.1); K06641 serine/threonine-protein kinase Chk2 [EC:2.7.11.1]	Serine/threonine-protein kinase Chk2 OS=Homo sapiens GN=CHEK2 PE=1 SV=1	B6UV61_PIG Protein kinase CHK2 isoform a OS=Sus scrofa PE=2 SV=1	IPR000253:Forkhead-associated (FHA) domain;IPR000719:Protein kinase domain;IPR002290:Serine/threonine- / dual specificity protein kinase, catalytic domain;IPR013026:Tetratricopeptide repeat-containing domain;IPR019734:Tetratricopeptide repeat;IPR020635:Tyrosine-protein kinase, catalytic domain	GO:0004672:protein kinase activity; Molecular Function;GO:0004713:protein tyrosine kinase activity; Molecular Function;GO:0005515:protein binding; Molecular Function;GO:0005524:ATP binding; Molecular Function;GO:0006468:protein phosphorylation; Biological Process;
TPGENE14330	8			LWGENE10985	BKGENE01704	\	HAGENE10494	JHGENE05146	\	MSGENE02416	PIGENE06029	RCGENE14871	TPGENE14330	CHEK2	212549663	CHEK2	6005850	Chek2	7710088	CHEK2	77736009	CHEK2; checkpoint kinase 2; K06641 serine/threonine-protein kinase Chk2 [EC:2.7.11.1]	Serine/threonine-protein kinase Chk2 OS=Homo sapiens GN=CHEK2 PE=1 SV=1	E2QU88_CANFA Uncharacterized protein OS=Canis familiaris GN=CHEK2 PE=4 SV=2	IPR000253:Forkhead-associated (FHA) domain;IPR000719:Protein kinase domain;IPR002290:Serine/threonine- / dual specificity protein kinase, catalytic domain;IPR020635:Tyrosine-protein kinase, catalytic domain	GO:0004672:protein kinase activity; Molecular Function;GO:0004713:protein tyrosine kinase activity; Molecular Function;GO:0005515:protein binding; Molecular Function;GO:0005524:ATP binding; Molecular Function;GO:0006468:protein phosphorylation; Biological Process;
HAGENE10117	10			LWGENE01725	BKGENE17734	BMGENE13088	HAGENE10117	JHGENE02636	LAGENE09592	MSGENE02289	PIGENE10088	RCGENE19975	TPGENE19217	\	\	CHMP7	22748641	Chmp7	21359827	CHMP7	149642791	CHMP7; charged multivesicular body protein 7; K15053 charged multivesicular body protein 7	Charged multivesicular body protein 7 OS=Homo sapiens GN=CHMP7 PE=1 SV=1	M3VK03_PIG Charged multivesicular body protein 7 OS=Sus scrofa GN=CHMP7 PE=2 SV=1	IPR005024:Snf7	GO:0000815:charged multivesicular body protein 7;GO:0005634:charged multivesicular body protein 7;GO:0008565:charged multivesicular body protein 7;GO:0015031:protein transport; Biological Process;GO:0045324:charged multivesicular body protein 7;
LWGENE11203	10			LWGENE11203	BKGENE09281	BMGENE08350	HAGENE19266	JHGENE02844	LAGENE01374	MSGENE02481	PIGENE09908	RCGENE19362	TPGENE04528	CHRM2	47523590	CHRM2	767946763	Chrm2	755516775	CHRM2	528947674	CHRM2; cholinergic receptor, muscarinic 2; K04130 muscarinic acetylcholine receptor M2	Muscarinic acetylcholine receptor M2 OS=Sus scrofa GN=CHRM2 PE=2 SV=1	M3XY52_MUSPF Uncharacterized protein OS=Mustela putorius furo GN=CHRM2 PE=3 SV=1	IPR000276:G protein-coupled receptor, rhodopsin-like;IPR000995:Muscarinic acetylcholine receptor family;IPR001065:Muscarinic acetylcholine receptor M2;IPR017452:GPCR, rhodopsin-like, 7TM	GO:0004930:G-protein coupled receptor activity; Molecular Function;GO:0005886:muscarinic acetylcholine receptor m2;GO:0005887:integral to plasma membrane; Cellular Component;GO:0007186:G-protein coupled receptor signaling pathway; Biological Process;GO:0008016:regulation of heart contraction; Biological Process;GO:0016021:integral to membrane; Cellular Component;GO:0016907:G-protein coupled acety…
LWGENE12883	10			LWGENE12883	BKGENE05441	BMGENE08179	HAGENE06659	JHGENE03427	LAGENE02288	MSGENE03841	PIGENE18010	RCGENE00277	TPGENE19229	\	\	CHTF8	94421448	Chtf8	84000434	CHTF8	528990832	CHTF8; CTF8, chromosome transmission fidelity factor 8 homolog (S. cerevisiae); K11270 chromosome transmission fidelity protein 8	Chromosome transmission fidelity protein 8 homolog OS=Bos taurus GN=CHTF8 PE=3 SV=1	M3V7Z3_PIG CTF8, chromosome transmission fidelity factor 8 homolog OS=Sus scrofa GN=CHTF8 PE=2 SV=1	IPR018607:Chromosome transmission fidelity protein 8	\
MSGENE19120	1			\	\	\	\	\	\	MSGENE19120	\	\	\	NLRC5	523580072	NLRC5	578829274	Nlrc5	568957137	NLRC5	528991054	CIITA; class II, major histocompatibility complex, transactivator; K08060 class II, major histocompatibility complex, transactivator	Protein NLRC5 OS=Homo sapiens GN=NLRC5 PE=1 SV=3	K9IVK0_PIG Protein NLRC5 OS=Sus scrofa GN=NLRC5 PE=2 SV=1	IPR003590:Leucine-rich repeat, ribonuclease inhibitor subtype	\
LWGENE00733	3			LWGENE00733	BKGENE19986	\	\	\	\	MSGENE04369	\	\	\	\	\	NAALADL2	767926203	Naaladl2	568889664	NAALADL2	741914419	cl4954_1; LOC100280279; K01301 N-acetylated-alpha-linked acidic dipeptidase [EC:3.4.17.21]	Inactive N-acetylated-alpha-linked acidic dipeptidase-like protein 2 OS=Homo sapiens GN=NAALADL2 PE=1 SV=3	L8HZE5_BOSMU Inactive N-acetylated-alpha-linked acidic dipeptidase-like protein 2 (Fragment) OS=Bos grunniens mutus GN=M91_11930 PE=4 SV=1	\	\
RCGENE18231	1			\	\	\	\	\	\	\	\	RCGENE18231	\	CLASP2	545861302	CLASP1	767917292	Clasp1	568909806	CLASP1	741916962	CLASP1; cytoplasmic linker associated protein 1; K16578 CLIP-associating protein 1/2	CLIP-associating protein 1 OS=Homo sapiens GN=CLASP1 PE=1 SV=1	B7Z4J0_HUMAN cDNA FLJ55790, highly similar to CLIP-associating protein 1 OS=Homo sapiens PE=2 SV=1	\	GO:0000086:hypothetical protein [Homo sapiens];GO:0000236:hypothetical protein [Homo sapiens];GO:0000777:hypothetical protein [Homo sapiens];GO:0001578:hypothetical protein [Homo sapiens];GO:0005794:hypothetical protein [Homo sapiens];GO:0005828:hypothetical protein [Homo sapiens];GO:0005829:hypothetical protein [Homo sapiens];GO:0005881:hypothetical protein [Homo sapiens];GO:0007020:hypothetical…
TPGENE01443	10			LWGENE15110	BKGENE13882	BMGENE15382	HAGENE12909	JHGENE14474	LAGENE14220	MSGENE09186	PIGENE04037	RCGENE12841	TPGENE01443	CLDN15	239504570	CLDN15	7656981	Cldn15	14149748	CLDN15	741974889	CLDN15, claudin-15; claudin 15; K06087 claudin	Claudin-15 OS=Bos taurus GN=CLDN15 PE=2 SV=1	C3VMK3_PIG Claudin 15 OS=Sus scrofa GN=CLDN15 PE=2 SV=1	IPR004031:PMP-22/EMP/MP20/Claudin superfamily;IPR006187:Claudin;IPR008094:Claudin-15	GO:0005198:structural molecule activity; Molecular Function;GO:0005886:claudin 15;GO:0005923:tight junction; Cellular Component;GO:0016020:membrane; Cellular Component;GO:0016021:integral to membrane; Cellular Component;
LWGENE09912	10			LWGENE09912	BKGENE07994	BMGENE13022	HAGENE18961	JHGENE17071	LAGENE00280	MSGENE01493	PIGENE03382	RCGENE12167	TPGENE16938	CLDN2	239504584	CLDN2	9966781	Cldn2	7710004	CLDN2	529014587	CLDN2; claudin 2; K06087 claudin	Claudin-2 OS=Canis familiaris GN=CLDN2 PE=2 SV=1	C3VMK9_PIG Claudin 2 OS=Sus scrofa GN=CLDN2 PE=2 SV=1	IPR004031:PMP-22/EMP/MP20/Claudin superfamily;IPR005411:Claudin-2;IPR006187:Claudin	GO:0005198:structural molecule activity; Molecular Function;GO:0005923:tight junction; Cellular Component;GO:0016021:integral to membrane; Cellular Component;
MSGENE19229	1			\	\	\	\	\	\	MSGENE19229	\	\	\	CLDN2	239504584	CLDN2	9966781	Cldn2	7710004	CLDN2	529014587	CLDN2; claudin 2; K06087 claudin	Claudin-2 OS=Canis familiaris GN=CLDN2 PE=2 SV=1	C3VMK9_PIG Claudin 2 OS=Sus scrofa GN=CLDN2 PE=2 SV=1	IPR004031:PMP-22/EMP/MP20/Claudin superfamily;IPR005411:Claudin-2;IPR006187:Claudin	GO:0005198:structural molecule activity; Molecular Function;GO:0005923:tight junction; Cellular Component;GO:0016021:integral to membrane; Cellular Component;
PIGENE13224	10			LWGENE17495	BKGENE08275	BMGENE18719	HAGENE02118	JHGENE18557	LAGENE07358	MSGENE15504	PIGENE13224	RCGENE08283	TPGENE06159	YTHDF2	545834628	YTHDF1	31377750	Ythdf1	30424609	YTHDF1	528973973	cleavage and polyadenylation specificity factor CPSF30-like; K14404 cleavage and polyadenylation specificity factor subunit 4	YTH domain family protein 1 OS=Homo sapiens GN=YTHDF1 PE=1 SV=1	M3VK41_PIG YTH domain family, member 1 OS=Sus scrofa GN=YTHDF1 PE=2 SV=1	IPR007275:YTH domain	\
RCGENE07792	8			LWGENE11885	BKGENE16121	BMGENE11444	HAGENE02744	\	LAGENE14532	MSGENE04352	\	RCGENE07792	TPGENE01931	MRC1	363814526	CLEC4D	767971856	Clec4d	253683460	CLEC4D	300797468	CLEC4D; C-type lectin domain family 4, member D; K10058 C-type lectin domain family 4 member D	C-type lectin domain family 4 member D OS=Homo sapiens GN=CLEC4D PE=1 SV=2	K9IVN7_PIG C-type lectin domain family 4 member A isoform 1 OS=Sus scrofa GN=CLEC4D_tv1 PE=2 SV=1	IPR001304:C-type lectin	GO:0030246:carbohydrate binding; Molecular Function;
BMGENE08244	1			\	\	BMGENE08244	\	\	\	\	\	\	\	CLIP2	545813772	CLIP2	116008447	Clip2	85662410	CLIP2	529007310	CLIP2; CAP-GLY domain containing linker protein 2; K10422 CAP-Gly domain-containing linker protein 2	CAP-Gly domain-containing linker protein 2 OS=Homo sapiens GN=CLIP2 PE=1 SV=1	E1BGH3_BOVIN Uncharacterized protein OS=Bos taurus GN=CLIP2 PE=4 SV=2	IPR000938:CAP Gly-rich domain	GO:0005881:cap-gly domain-containing linker protein 2;
TPGENE03754	1			\	\	\	\	\	\	\	\	\	TPGENE03754	CLN3	163915149	CLN3	554790412	Cln3	568949522	CLN3	741974463	CLN3; ceroid-lipofuscinosis, neuronal 3; K12389 battenin	Battenin OS=Macaca fascicularis GN=CLN3 PE=2 SV=1	H3BMN4_HUMAN Battenin (Fragment) OS=Homo sapiens GN=CLN3 PE=4 SV=1	IPR003492:Batten's disease protein Cln3	GO:0000046:ceroid- neuronal juvenile ( spielmeyer-vogt disease) isoform cra_c;GO:0000139:ceroid- neuronal juvenile ( spielmeyer-vogt disease) isoform cra_c;GO:0001508:ceroid- neuronal juvenile ( spielmeyer-vogt disease) isoform cra_c;GO:0001575:ceroid- neuronal juvenile ( spielmeyer-vogt disease) isoform cra_c;GO:0005634:ceroid- neuronal juvenile ( spielmeyer-vogt disease) isoform cra_c;GO:000573…
LWGENE17237	1			LWGENE17237	\	\	\	\	\	\	\	\	\	CNTN1	350584500	CNTN2	4827022	Cntn2	568908604	CNTN2	359073808	CNTN2; contactin 2 (axonal); K06760 contactin 2	Contactin-2 OS=Mus musculus GN=Cntn2 PE=2 SV=2	L9JB03_TUPCH Contactin-2 OS=Tupaia chinensis GN=TREES_T100003432 PE=4 SV=1	\	\
TPGENE03280	9			LWGENE02955	BKGENE13614	BMGENE01371	HAGENE15794	JHGENE02458	LAGENE00673	\	PIGENE03267	RCGENE04358	TPGENE03280	LOC100626866	350596171	CNTNAP3	578816729	Cntnap3	568983347	CNTNAP4	330688455	CNTNAP2; contactin associated protein-like 2; K07380 contactin associated protein-like 2	Contactin-associated protein-like 3 OS=Homo sapiens GN=CNTNAP3 PE=2 SV=3	L8J2A1_BOSMU Contactin-associated protein-like 3 (Fragment) OS=Bos grunniens mutus GN=M91_07350 PE=4 SV=1	IPR000421:Coagulation factor 5/8 C-terminal type domain;IPR000742:Epidermal growth factor-like domain;IPR001791:Laminin G domain;IPR002181:Fibrinogen, alpha/beta/gamma chain, C-terminal globular domain	GO:0005515:protein binding; Molecular Function;GO:0007155:cell adhesion; Biological Process;
JHGENE18558	9			LWGENE17499	\	BMGENE18723	HAGENE02121	JHGENE18558	LAGENE07356	MSGENE15502	PIGENE13220	RCGENE08280	TPGENE06157	COL14A1	545820332	COL20A1	768017766	Col20a1	755502411	COL20A1	741948459	col20a1; collagen, type XX, alpha 1; K08133 collagen, type XIV, alpha	Collagen alpha-1(XX) chain OS=Homo sapiens GN=COL20A1 PE=1 SV=4	E1BFY7_BOVIN Uncharacterized protein OS=Bos taurus GN=COL20A1 PE=4 SV=2	IPR001791:Laminin G domain;IPR002035:von Willebrand factor, type A;IPR003961:Fibronectin, type III	GO:0005515:protein binding; Molecular Function;
LWGENE17245	2			LWGENE17245	\	\	HAGENE17251	\	\	\	\	\	\	LOC100156689	545799434	COL20A1	768017758	Col20a1	568920453	COL20A1	741948471	col20a1; collagen, type XX, alpha 1; K08133 collagen, type XIV, alpha	Collagen alpha-1(XX) chain OS=Homo sapiens GN=COL20A1 PE=1 SV=4	L8HPG4_BOSMU Collagen alpha-1(XX) chain (Fragment) OS=Bos grunniens mutus GN=M91_10707 PE=4 SV=1	IPR003961:Fibronectin, type III	GO:0005515:protein binding; Molecular Function;
PIGENE14277	10			LWGENE06948	BKGENE17130	BMGENE18519	HAGENE09585	JHGENE19664	LAGENE01929	MSGENE00357	PIGENE14277	RCGENE04053	TPGENE03700	\	\	KIAA1524	767927329	C330027C09Rik	568995255	KIAA1524	528936383	COL24A1; collagen, type XXIV, alpha 1; K06236 collagen, type I/II/III/V/XI/XXIV/XXVII, alpha	Protein CIP2A OS=Homo sapiens GN=KIAA1524 PE=1 SV=2	F1MEN7_BOVIN Uncharacterized protein OS=Bos taurus GN=KIAA1524 PE=4 SV=2	\	\
TPGENE03228	10			LWGENE02132	BKGENE04426	BMGENE12863	HAGENE10403	JHGENE05076	LAGENE19978	MSGENE10215	PIGENE09011	RCGENE07914	TPGENE03228	CBLN1	162952048	CBLN1	4757922	Cbln1	56744247	LOC101909193	528930363	complement C1q subcomponent subunit C-like; K03988 complement C1q subcomponent subunit C	Cerebellin-1 OS=Rattus norvegicus GN=Cbln1 PE=1 SV=2	A8S2B8_PIG Precerebellin 1 OS=Sus scrofa GN=Cbln1 PE=2 SV=1	IPR001073:Complement C1q protein	GO:0005576:cerebellin-1 precursor;GO:0030054:cerebellin-1 precursor;GO:0045202:cerebellin-1 precursor;
MSGENE06934	1			\	\	\	\	\	\	MSGENE06934	\	\	\	CNTNAP4	545829209	LOC100289279	767955820	Cntnap4	31982591	CNTNAP3	126165230	contactin-associated protein-like 2-like; K07380 contactin associated protein-like 2	Contactin-associated protein-like 3 OS=Homo sapiens GN=CNTNAP3 PE=2 SV=3	A1L585_BOVIN Cell recognition molecule CASPR3 OS=Bos taurus GN=CNTNAP3 PE=2 SV=1	IPR000421:Coagulation factor 5/8 C-terminal type domain;IPR001791:Laminin G domain	GO:0007155:cell adhesion; Biological Process;
BKGENE08118	10			LWGENE12525	BKGENE08118	BMGENE19249	HAGENE12279	JHGENE14205	LAGENE04631	MSGENE12450	PIGENE17584	RCGENE07780	TPGENE00875	COPS6	157427722	COPS6	34147637	Cops6	33563284	COPS6	156120575	COPS6; COP9 constitutive photomorphogenic homolog subunit 6 (Arabidopsis); K12179 COP9 signalosome complex subunit 6	COP9 signalosome complex subunit 6 OS=Sus scrofa GN=COPS6 PE=2 SV=1	K9II89_DESRO Putative cop9 signalosome complex subunit 6 OS=Desmodus rotundus PE=2 SV=1	IPR000555:JAB/MPN domain;IPR024969:Rpn11/EIF3F C-terminal domain	GO:0005515:protein binding; Molecular Function;GO:0005737:cop9 signalosome complex subunit 6;GO:0008180:cop9 signalosome complex subunit 6;
BMGENE05184	10			LWGENE14573	BKGENE04493	BMGENE05184	HAGENE04106	JHGENE06339	LAGENE00043	MSGENE01312	PIGENE04505	RCGENE14320	TPGENE00167	\	\	COQ7	25453484	Coq7	756141038	COQ7	164420711	COQ7; coenzyme Q7 homolog, ubiquinone (yeast); K06134 ubiquinone biosynthesis monooxygenase Coq7 [EC:1.14.13.-]	Ubiquinone biosynthesis protein COQ7 homolog OS=Bos taurus GN=COQ7 PE=2 SV=1	M3WJK9_FELCA Uncharacterized protein OS=Felis catus GN=COQ7 PE=4 SV=1	IPR011566:Ubiquinone biosynthesis protein Coq7	GO:0006744:ubiquinone biosynthetic process; Biological Process;GO:0055114:oxidation-reduction process; Biological Process;
LWGENE06274	10			LWGENE06274	BKGENE11713	BMGENE12390	HAGENE10129	JHGENE11555	LAGENE20196	MSGENE01421	PIGENE12469	RCGENE20026	TPGENE14272	LOC100518203	335292613	OR10G2	612339332	Olfr981	22129713	LOC522385	529011851	cOR10G11; cOR10G11 olfactory receptor family 10 subfamily G-like; K04257 olfactory receptor	Olfactory receptor 10G6 OS=Homo sapiens GN=OR10G6 PE=2 SV=1	F1Q060_CANFA Uncharacterized protein (Fragment) OS=Canis familiaris GN=cOR10G11 PE=3 SV=2	IPR000276:G protein-coupled receptor, rhodopsin-like;IPR000725:Olfactory receptor;IPR017452:GPCR, rhodopsin-like, 7TM	GO:0004930:G-protein coupled receptor activity; Molecular Function;GO:0004984:olfactory receptor activity; Molecular Function;GO:0007186:G-protein coupled receptor signaling pathway; Biological Process;GO:0016021:integral to membrane; Cellular Component;
BKGENE20697	1			\	BKGENE20697	\	\	\	\	\	\	\	\	LOC100155213	194036506	OR11A1	7363441	Olfr279	568992530	LOC100300546	741912728	cOR11M2; olfactory receptor family 11 subfamily M; K04257 olfactory receptor	Olfactory receptor 11A1 OS=Homo sapiens GN=OR11A1 PE=2 SV=1	M3WQ96_FELCA Uncharacterized protein OS=Felis catus GN=LOC101081477 PE=3 SV=1	IPR000276:G protein-coupled receptor, rhodopsin-like;IPR000725:Olfactory receptor;IPR017452:GPCR, rhodopsin-like, 7TM	GO:0004930:G-protein coupled receptor activity; Molecular Function;GO:0004984:olfactory receptor activity; Molecular Function;GO:0007186:G-protein coupled receptor signaling pathway; Biological Process;GO:0016021:integral to membrane; Cellular Component;
BMGENE20531	1			\	\	BMGENE20531	\	\	\	\	\	\	\	LOC100155213	194036506	OR11A1	7363441	Olfr279	568992530	LOC100300546	741912728	cOR11M2; olfactory receptor family 11 subfamily M; K04257 olfactory receptor	Olfactory receptor 11A1 OS=Homo sapiens GN=OR11A1 PE=2 SV=1	M3WQ96_FELCA Uncharacterized protein OS=Felis catus GN=LOC101081477 PE=3 SV=1	IPR000276:G protein-coupled receptor, rhodopsin-like;IPR000725:Olfactory receptor;IPR017452:GPCR, rhodopsin-like, 7TM	GO:0004930:G-protein coupled receptor activity; Molecular Function;GO:0004984:olfactory receptor activity; Molecular Function;GO:0007186:G-protein coupled receptor signaling pathway; Biological Process;GO:0016021:integral to membrane; Cellular Component;
JHGENE20657	1			\	\	\	\	JHGENE20657	\	\	\	\	\	LOC100155213	194036506	OR11A1	7363441	Olfr279	568992530	LOC100300546	741912728	cOR11M2; olfactory receptor family 11 subfamily M; K04257 olfactory receptor	Olfactory receptor 11A1 OS=Homo sapiens GN=OR11A1 PE=2 SV=1	M3WQ96_FELCA Uncharacterized protein OS=Felis catus GN=LOC101081477 PE=3 SV=1	IPR000276:G protein-coupled receptor, rhodopsin-like;IPR000725:Olfactory receptor;IPR017452:GPCR, rhodopsin-like, 7TM	GO:0004930:G-protein coupled receptor activity; Molecular Function;GO:0004984:olfactory receptor activity; Molecular Function;GO:0007186:G-protein coupled receptor signaling pathway; Biological Process;GO:0016021:integral to membrane; Cellular Component;
RCGENE20504	1			\	\	\	\	\	\	\	\	RCGENE20504	\	LOC100155213	194036506	OR11A1	7363441	Olfr279	568992530	LOC100300546	741912728	cOR11M2; olfactory receptor family 11 subfamily M; K04257 olfactory receptor	Olfactory receptor 11A1 OS=Homo sapiens GN=OR11A1 PE=2 SV=1	M3WQ96_FELCA Uncharacterized protein OS=Felis catus GN=LOC101081477 PE=3 SV=1	IPR000276:G protein-coupled receptor, rhodopsin-like;IPR000725:Olfactory receptor;IPR017452:GPCR, rhodopsin-like, 7TM	GO:0004930:G-protein coupled receptor activity; Molecular Function;GO:0004984:olfactory receptor activity; Molecular Function;GO:0007186:G-protein coupled receptor signaling pathway; Biological Process;GO:0016021:integral to membrane; Cellular Component;
TPGENE16699	1			\	\	\	\	\	\	\	\	\	TPGENE16699	LOC100155213	194036506	OR11A1	7363441	Olfr279	568992530	LOC100300546	741912728	cOR11M2; olfactory receptor family 11 subfamily M; K04257 olfactory receptor	Olfactory receptor 11A1 OS=Homo sapiens GN=OR11A1 PE=2 SV=1	M3WQ96_FELCA Uncharacterized protein OS=Felis catus GN=LOC101081477 PE=3 SV=1	IPR000276:G protein-coupled receptor, rhodopsin-like;IPR000725:Olfactory receptor;IPR017452:GPCR, rhodopsin-like, 7TM	GO:0004930:G-protein coupled receptor activity; Molecular Function;GO:0004984:olfactory receptor activity; Molecular Function;GO:0007186:G-protein coupled receptor signaling pathway; Biological Process;GO:0016021:integral to membrane; Cellular Component;
TPGENE07232	10			LWGENE20381	BKGENE20608	BMGENE20892	HAGENE20581	JHGENE20566	LAGENE20566	MSGENE20635	PIGENE20568	RCGENE20402	TPGENE07232	COX6B	545830272	COX6B2	34222387	Cox6b2	577861050	COX6B2	60592990	COX6B2; cytochrome c oxidase subunit VIb polypeptide 2 (testis); K02267 cytochrome c oxidase subunit 6b	Cytochrome c oxidase subunit 6B2 OS=Bos taurus GN=COX6B2 PE=2 SV=1	G3UBN4_LOXAF Uncharacterized protein OS=Loxodonta africana GN=LOC100676021 PE=4 SV=1	IPR003213:Cytochrome c oxidase, subunit VIb	GO:0004129:cytochrome-c oxidase activity; Molecular Function;GO:0005739:mitochondrion; Cellular Component;GO:0030061:cytochrome c oxidase subunit 6b2-like;
HAGENE03688	10			LWGENE07989	BKGENE05281	BMGENE16313	HAGENE03688	JHGENE03314	LAGENE14485	MSGENE10450	PIGENE04548	RCGENE10405	TPGENE01134	SYCE1	545872958	SYCE1	219555718	Syce1	219555720	SYCE1	219555722	cpG-binding protein-like; K14960 COMPASS component SPP1	Synaptonemal complex central element protein 1 OS=Bos taurus GN=SYCE1 PE=2 SV=2	G1L8P2_AILME Uncharacterized protein OS=Ailuropoda melanoleuca GN=SYCE1 PE=4 SV=1	IPR026676:Synaptonemal complex central element protein 1	GO:0000795:synaptonemal complex; Cellular Component;GO:0007128:meiotic prophase I; Biological Process;GO:0007130:synaptonemal complex assembly; Biological Process;GO:0070193:synaptonemal complex organization; Biological Process;
LWGENE09731	10			LWGENE09731	BKGENE13643	BMGENE05149	HAGENE04899	JHGENE13924	LAGENE14674	MSGENE14498	PIGENE11146	RCGENE17671	TPGENE00350	CPLX1	335293102	CPLX2	767938035	Cplx2	6753508	CPLX2	528961669	CPLX2; complexin 2; K15294 complexin-1/2	Complexin-2 OS=Rattus norvegicus GN=Cplx2 PE=1 SV=1	H2RBN0_PANTR Uncharacterized protein (Fragment) OS=Pan troglodytes GN=CPLX2 PE=4 SV=1	IPR008849:Synaphin	GO:0006836:neurotransmitter transport; Biological Process;GO:0019905:syntaxin binding; Molecular Function;
RCGENE02929	10			LWGENE10843	BKGENE01028	BMGENE01777	HAGENE19238	JHGENE16945	LAGENE09371	MSGENE13251	PIGENE18051	RCGENE02929	TPGENE16552	CPSF6	305855176	CPSF6	162329583	Cpsf6	62909983	CPSF6	118151280	CPSF6; cleavage and polyadenylation specific factor 6, 68kDa; K14398 cleavage and polyadenylation specificity factor subunit 6/7	Cleavage and polyadenylation specificity factor subunit 6 OS=Homo sapiens GN=CPSF6 PE=1 SV=2	K7CF67_PANTR Cleavage and polyadenylation specific factor 6, 68kDa OS=Pan troglodytes GN=CPSF6 PE=2 SV=1	IPR000504:RNA recognition motif domain	GO:0000166:cleavage and polyadenylation specificity factor subunit 6;GO:0003676:nucleic acid binding; Molecular Function;GO:0003729:cleavage and polyadenylation specificity factor subunit 6;GO:0005515:cleavage and polyadenylation specificity factor subunit 6;GO:0005730:cleavage and polyadenylation specificity factor subunit 6;GO:0005849:cleavage and polyadenylation specificity factor subunit 6;GO…
BKGENE17573	1			\	BKGENE17573	\	\	\	\	\	\	\	\	CPN1	350592981	CPZ	62388879	Cpz	120407066	CPZ	134085825	CPZ; carboxypeptidase Z; K13022 carboxypeptidase Z [EC:3.4.17.-]	Carboxypeptidase Z OS=Homo sapiens GN=CPZ PE=1 SV=2	G3UN06_LOXAF Uncharacterized protein (Fragment) OS=Loxodonta africana PE=4 SV=1	IPR000834:Peptidase M14, carboxypeptidase A	GO:0004181:metallocarboxypeptidase activity; Molecular Function;GO:0005578:unnamed protein product [Homo sapiens];GO:0006508:proteolysis; Biological Process;GO:0008270:zinc ion binding; Molecular Function;GO:0016055:unnamed protein product [Homo sapiens];GO:0046872:unnamed protein product [Homo sapiens];
JHGENE18903	1			\	\	\	\	JHGENE18903	\	\	\	\	\	CPN1	350592981	CPZ	62388879	Cpz	120407066	CPZ	134085825	CPZ; carboxypeptidase Z; K13022 carboxypeptidase Z [EC:3.4.17.-]	Carboxypeptidase Z OS=Homo sapiens GN=CPZ PE=1 SV=2	F7DPN5_MACMU Uncharacterized protein OS=Macaca mulatta PE=2 SV=1	IPR000834:Peptidase M14, carboxypeptidase A	GO:0004181:metallocarboxypeptidase activity; Molecular Function;GO:0005578:unnamed protein product [Homo sapiens];GO:0006508:proteolysis; Biological Process;GO:0008270:zinc ion binding; Molecular Function;GO:0016055:unnamed protein product [Homo sapiens];GO:0046872:unnamed protein product [Homo sapiens];
TPGENE10897	10			LWGENE09114	BKGENE12082	BMGENE10140	HAGENE06784	JHGENE02407	LAGENE09257	MSGENE08597	PIGENE17521	RCGENE06514	TPGENE10897	CPE	148228720	CPZ	62388877	Cpz	120407066	CPZ	134085825	CPZ; carboxypeptidase Z; K13022 carboxypeptidase Z [EC:3.4.17.-]	Carboxypeptidase Z OS=Homo sapiens GN=CPZ PE=1 SV=2	F1N2T3_BOVIN Uncharacterized protein OS=Bos taurus GN=CPZ PE=4 SV=1	IPR000834:Peptidase M14, carboxypeptidase A;IPR020067:Frizzled domain	GO:0004181:metallocarboxypeptidase activity; Molecular Function;GO:0005515:protein binding; Molecular Function;GO:0006508:proteolysis; Biological Process;GO:0008270:zinc ion binding; Molecular Function;
BKGENE13036	10			LWGENE18316	BKGENE13036	BMGENE12989	HAGENE05903	JHGENE01029	LAGENE15025	MSGENE01957	PIGENE20001	RCGENE08026	TPGENE16248	CRYAB	545848507	LOC102724652	578846888	Cryaa	514825575	CRYAA	27805855	CRYAA; crystallin, alpha A; K09541 crystallin, alpha A	Alpha-crystallin A chain OS=Sus scrofa GN=CRYAA PE=1 SV=1	M3YE80_MUSPF Uncharacterized protein OS=Mustela putorius furo GN=CRYAA PE=3 SV=1	IPR001436:Alpha crystallin/Heat shock protein;IPR002068:Alpha crystallin/Hsp20 domain;IPR003090:Alpha-crystallin, N-terminal;IPR012274:Alpha-crystallin, subunit A	GO:0005212:structural constituent of eye lens; Molecular Function;GO:0005634:cryaa_pig ame: full=alpha-crystallin a chain contains: ame: full=alpha-crystallin a short form;GO:0005737:cryaa_pig ame: full=alpha-crystallin a chain contains: ame: full=alpha-crystallin a short form;GO:0046872:cryaa_pig ame: full=alpha-crystallin a chain contains: ame: full=alpha-crystallin a short form;
TPGENE05988	10			LWGENE13463	BKGENE16019	BMGENE08309	HAGENE13724	JHGENE17162	LAGENE15308	MSGENE10033	PIGENE12169	RCGENE14572	TPGENE05988	CSRNP3	545874520	CSRNP2	578824285	Csrnp2	23510287	CSRNP2	741926076	CSRNP2; cysteine-serine-rich nuclear protein 2; K17494 cysteine/serine-rich nuclear protein	Cysteine/serine-rich nuclear protein 2 OS=Homo sapiens GN=CSRNP2 PE=1 SV=1	D2HHE9_AILME Uncharacterized protein (Fragment) OS=Ailuropoda melanoleuca GN=CSRNP2 PE=4 SV=1	IPR023260:Cysteine/serine-rich nuclear protein family	GO:0003700:cysteine serine-rich nuclear protein 2-like;GO:0005634:cysteine serine-rich nuclear protein 2-like;GO:0010923:cysteine serine-rich nuclear protein 2-like;GO:0019902:cysteine serine-rich nuclear protein 2-like;GO:0045944:cysteine serine-rich nuclear protein 2-like;
JHGENE02373	10			LWGENE17102	BKGENE01009	BMGENE18614	HAGENE06819	JHGENE02373	LAGENE09292	MSGENE08562	PIGENE09869	RCGENE06480	TPGENE13133	CTBP2	350593146	CTBP1	530427319	Ctbp1	7304989	CTBP1	528906339	CTBP1; C-terminal binding protein 1; K04496 C-terminal binding protein	C-terminal-binding protein 1 OS=Rattus norvegicus GN=Ctbp1 PE=1 SV=3	M3VHA2_PIG C-terminal binding protein 1 tv2 OS=Sus scrofa GN=CTBP1 PE=2 SV=1	IPR006139:D-isomer specific 2-hydroxyacid dehydrogenase, catalytic domain;IPR006140:D-isomer specific 2-hydroxyacid dehydrogenase, NAD-binding	GO:0008152:metabolic process; Biological Process;GO:0016616:oxidoreductase activity, acting on the CH-OH group of donors, NAD or NADP as acceptor; Molecular Function;GO:0048037:cofactor binding; Molecular Function;GO:0051287:NAD binding; Molecular Function;GO:0055114:oxidation-reduction process; Biological Process;
RCGENE18101	1			\	\	\	\	\	\	\	\	RCGENE18101	\	CYFIP2	545878347	CYFIP1	74271907	Cyfip1	568947541	CYFIP1	329664852	CYFIP1; cytoplasmic FMR1 interacting protein 1; K05749 cytoplasmic FMR1 interacting protein	Cytoplasmic FMR1-interacting protein 1 OS=Mus musculus GN=Cyfip1 PE=1 SV=1	K9KFL5_HORSE Cytoplasmic FMR1-interacting protein 1-like protein (Fragment) OS=Equus caballus PE=2 SV=1	IPR008081:Cytoplasmic FMR1-interacting	\
TPGENE17749	9			LWGENE20497	BKGENE20505	BMGENE20807	HAGENE20538	JHGENE20420	LAGENE20537	\	PIGENE20781	RCGENE20175	TPGENE17749	CYP2J34	347543811	CYP2J2	18491008	Cyp2j6	160948618	LOC530929	119890124	CYP2J34; cytochrome P450, family 2, subfamily J, polypeptide 34; K07418 cytochrome P450, family 2, subfamily J [EC:1.14.14.1]	Cytochrome P450 2J2 OS=Homo sapiens GN=CYP2J2 PE=1 SV=2	K7GM60_PIG Uncharacterized protein OS=Sus scrofa GN=LOC100524940 PE=3 SV=1	IPR001128:Cytochrome P450;IPR002401:Cytochrome P450, E-class, group I;IPR008071:Cytochrome P450, E-class, group I, CYP2J-like	GO:0005506:iron ion binding; Molecular Function;GO:0009055:electron carrier activity; Molecular Function;GO:0016705:oxidoreductase activity, acting on paired donors, with incorporation or reduction of molecular oxygen; Molecular Function;GO:0016712:oxidoreductase activity, acting on paired donors, with incorporation or reduction of molecular oxygen, reduced flavin or flavoprotein as one donor, an…
BMGENE20838	8			LWGENE20382	\	BMGENE20838	HAGENE20504	\	LAGENE20344	MSGENE20782	PIGENE20647	RCGENE20518	TPGENE04375	CYP4F2	545808868	CYP4F3	312836835	Cyp4f15	568998489	LOC100295883	297476368	CYP4F2; cytochrome P450, family 4, subfamily F, polypeptide 2; K17726 leukotriene-B4 20-monooxygenase [EC:1.14.13.30]	Leukotriene-B(4) omega-hydroxylase 2 OS=Rattus norvegicus GN=Cyp4f3 PE=2 SV=1	A7KZS0_PIG Cytochrome P450 (Fragment) OS=Sus scrofa GN=CYP4F52 PE=2 SV=1	IPR001128:Cytochrome P450;IPR002402:Cytochrome P450, E-class, group II	GO:0004497:monooxygenase activity; Molecular Function;GO:0005506:iron ion binding; Molecular Function;GO:0009055:electron carrier activity; Molecular Function;GO:0016705:oxidoreductase activity, acting on paired donors, with incorporation or reduction of molecular oxygen; Molecular Function;GO:0020037:heme binding; Molecular Function;GO:0055114:oxidation-reduction process; Biological Process;
HAGENE20812	1			\	\	\	HAGENE20812	\	\	\	\	\	\	CYP8B1	47523906	CYP8B1	166362724	Cyp8b1	227497652	PTGIS	27806107	CYP8B1; cytochrome P-450 8B1 (EC:1.14.13.96); K07431 sterol 12-alpha-hydroxylase [EC:1.14.13.95 1.14.13.96]	5-beta-cholestane-3-alpha,7-alpha-diol 12-alpha-hydroxylase OS=Sus scrofa GN=CYP8B1 PE=2 SV=1	L8IWL2_BOSMU 5-beta-cholestane-3-alpha,7-alpha-diol 12-alpha-hydroxylase OS=Bos grunniens mutus GN=M91_15448 PE=3 SV=1	IPR001128:Cytochrome P450;IPR002403:Cytochrome P450, E-class, group IV	GO:0004497:monooxygenase activity; Molecular Function;GO:0005506:iron ion binding; Molecular Function;GO:0005789:5-beta-cholestane-3- -alpha-diol 12-alpha-hydroxylase;GO:0009055:electron carrier activity; Molecular Function;GO:0016021:5-beta-cholestane-3- -alpha-diol 12-alpha-hydroxylase;GO:0016705:oxidoreductase activity, acting on paired donors, with incorporation or reduction of molecular oxyg…
LWGENE20675	10			LWGENE20675	BKGENE20826	BMGENE20912	HAGENE20779	JHGENE20781	LAGENE20766	MSGENE20883	PIGENE20822	RCGENE20624	TPGENE20442	CYP8B1	47523906	CYP8B1	166362724	Cyp8b1	227497652	PTGIS	27806107	CYP8B1; cytochrome P-450 8B1 (EC:1.14.13.96); K07431 sterol 12-alpha-hydroxylase [EC:1.14.13.95 1.14.13.96]	5-beta-cholestane-3-alpha,7-alpha-diol 12-alpha-hydroxylase OS=Sus scrofa GN=CYP8B1 PE=2 SV=1	L8IWL2_BOSMU 5-beta-cholestane-3-alpha,7-alpha-diol 12-alpha-hydroxylase OS=Bos grunniens mutus GN=M91_15448 PE=3 SV=1	IPR001128:Cytochrome P450;IPR002403:Cytochrome P450, E-class, group IV	GO:0004497:monooxygenase activity; Molecular Function;GO:0005506:iron ion binding; Molecular Function;GO:0005789:5-beta-cholestane-3- -alpha-diol 12-alpha-hydroxylase;GO:0009055:electron carrier activity; Molecular Function;GO:0016021:5-beta-cholestane-3- -alpha-diol 12-alpha-hydroxylase;GO:0016705:oxidoreductase activity, acting on paired donors, with incorporation or reduction of molecular oxyg…
BKGENE09657	10			LWGENE03568	BKGENE09657	BMGENE19384	HAGENE07435	JHGENE12930	LAGENE06752	MSGENE08965	PIGENE12755	RCGENE10377	TPGENE14730	CYTH2	545831747	CYTH3	4758968	Cyth3	254750656	CYTH3	741975461	CYTH3; cytohesin 3; K18441 cytohesin	Cytohesin-3 OS=Mus musculus GN=Cyth3 PE=1 SV=1	I3MN54_SPETR Uncharacterized protein (Fragment) OS=Spermophilus tridecemlineatus GN=CYTH3 PE=4 SV=1	IPR000904:SEC7-like;IPR001849:Pleckstrin homology domain	GO:0005086:ARF guanyl-nucleotide exchange factor activity; Molecular Function;GO:0005515:protein binding; Molecular Function;GO:0005543:phospholipid binding; Molecular Function;GO:0032012:regulation of ARF protein signal transduction; Biological Process;
LWGENE00253	8			LWGENE00253	BKGENE09989	BMGENE08953	HAGENE00828	\	LAGENE10323	MSGENE03518	PIGENE11870	RCGENE08480	\	LOC100524873	545836442	UQCRH	83627705	Uqcrh	21539599	UQCRH	77736435	cytochrome b-c1 complex subunit 6, mitochondrial-like; K00416 ubiquinol-cytochrome c reductase subunit 6	Cytochrome b-c1 complex subunit 6, mitochondrial OS=Bos taurus GN=UQCRH PE=1 SV=2	B9VH04_SHEEP Cytochrome b-c1 complex subunit 6 OS=Ovis aries GN=UQCRH PE=3 SV=1	IPR003422:Cytochrome b-c1 complex, subunit 6;IPR023184:Ubiquinol-cytochrome C reductase hinge domain	GO:0006122:mitochondrial electron transport, ubiquinol to cytochrome c; Biological Process;GO:0008121:ubiquinol-cytochrome-c reductase activity; Molecular Function;
HAGENE07738	10			LWGENE16717	BKGENE16695	BMGENE14797	HAGENE07738	JHGENE19494	LAGENE17216	MSGENE17433	PIGENE14625	RCGENE01490	TPGENE08589	UQCRB	297747368	UQCRB	363498929	Uqcrb	13385726	UQCRB	77736572	cytochrome b-c1 complex subunit 7-like; K00417 ubiquinol-cytochrome c reductase subunit 7	Cytochrome b-c1 complex subunit 7 OS=Bos taurus GN=UQCRB PE=1 SV=3	F6Z0Q3_HORSE Cytochrome b-c1 complex subunit 7 OS=Equus caballus GN=UQCRB PE=3 SV=1	IPR003197:Cytochrome b-c1 complex subunit 7	GO:0005750:mitochondrial respiratory chain complex III; Cellular Component;GO:0006122:mitochondrial electron transport, ubiquinol to cytochrome c; Biological Process;
LWGENE01906	10			LWGENE01906	BKGENE17199	BMGENE00795	HAGENE13712	JHGENE01403	LAGENE15321	MSGENE18276	PIGENE12182	RCGENE19470	TPGENE00096	\	\	COX14	767975706	Cox14	34304032	COX14	528948901	cytochrome c oxidase assembly protein COX14-like; K18181 cytochrome c oxidase assembly factor 14	Cytochrome c oxidase assembly protein COX14 OS=Bos taurus GN=COX14 PE=3 SV=1	L8Y707_TUPCH Uncharacterized protein OS=Tupaia chinensis GN=TREES_T100013752 PE=4 SV=1	\	\
BMGENE17323	10			LWGENE17235	BKGENE19386	BMGENE17323	HAGENE07148	JHGENE03982	LAGENE12962	MSGENE06627	PIGENE19403	RCGENE15919	TPGENE14679	LOC100624067	545829080	COX4I2	17999526	Cox4i2	16716379	COX4I2	528974077	cytochrome c oxidase subunit 4 isoform 2, mitochondrial-like; K02263 cytochrome c oxidase subunit 4	Cytochrome c oxidase subunit 4 isoform 2, mitochondrial OS=Homo sapiens GN=COX4I2 PE=1 SV=2	E1B8K7_BOVIN Uncharacterized protein OS=Bos taurus GN=COX4I2 PE=4 SV=1	IPR004203:Cytochrome c oxidase subunit IV family;IPR013288:Cytochrome c oxidase subunit IV	GO:0004129:cytochrome-c oxidase activity; Molecular Function;
MSGENE20495	1			\	\	\	\	\	\	MSGENE20495	\	\	\	LOC100524940	350586158	CYP2J2	18491008	Cyp2j9	24850102	LOC530929	119890124	cytochrome P450 2J2-like; K07418 cytochrome P450, family 2, subfamily J [EC:1.14.14.1]	Cytochrome P450 2J2 OS=Homo sapiens GN=CYP2J2 PE=1 SV=2	K7GM60_PIG Uncharacterized protein OS=Sus scrofa GN=LOC100524940 PE=3 SV=1	IPR001128:Cytochrome P450;IPR002401:Cytochrome P450, E-class, group I;IPR008071:Cytochrome P450, E-class, group I, CYP2J-like	GO:0005506:iron ion binding; Molecular Function;GO:0009055:electron carrier activity; Molecular Function;GO:0016705:oxidoreductase activity, acting on paired donors, with incorporation or reduction of molecular oxygen; Molecular Function;GO:0016712:oxidoreductase activity, acting on paired donors, with incorporation or reduction of molecular oxygen, reduced flavin or flavoprotein as one donor, an…
[truncated: 1,055 more rows]
