# Supplementary material for: Comprehensive variation discovery and recovery of missing sequence in the pig genome using multiple de novo assemblies
Source: HighWire-hosted journal article supplement (doi:10.1101/gr.207456.116), 2016-09-19
Supplement: Supplemental_Table_S22.xlsx [file Supplemental_Table_S22.xlsx]

## Sheet: Supplemental Table S22
Supplemental Table S22. List of coding SNPs under selection (FDR < 0.05, Arlequin).
Selected in domestic population	Scaffold ID	Site	Major allele of Chinese wild boar	Alternate allell	Gene ID	CDS position	SNP annotation	Amino acid position	Amino acid (Chinses wild boar)	Amino acid (alternate)
			Major allele of Chinese wild boar	Alternate allell	Gene ID	CDS position	SNP annotation	Amino acid position	Amino acid (Chinses wild boar)	Amino acid (alternate)
Bamaxiang	BK.scaffold11569	190	A	G	BKGENE00500	34	Missense	12	S	G
Bamaxiang	BK.scaffold11569	197	G	A	BKGENE00500	41	Missense	14	S	N
Bamaxiang	LA.scaffold473545	450	G	A	LAGENE18181	651	Synonymous	217	G	G
Bamaxiang	BK.scaffold11569	459	C	T	BKGENE00500	45	Synonymous	15	G	G
Bamaxiang	LA.scaffold473545	543	G	A	LAGENE18181	558	Synonymous	186	R	R
Bamaxiang	LA.scaffold473545	818	C	A	LAGENE18181	283	Missense	95	V	F
Bamaxiang	LA.scaffold473545	834	T	G	LAGENE18181	267	Missense	89	K	N
Bamaxiang	LA.scaffold473545	847	G	A	LAGENE18181	254	Missense	85	P	L
Bamaxiang	LA.scaffold473545	854	T	C	LAGENE18181	247	Missense	83	T	A
Bamaxiang	LA.scaffold473545	962	C	T	LAGENE18181	139	Missense	47	V	M
Bamaxiang	HA.scaffold5619	1201	A	G	HAGENE18256	198	Synonymous	66	F	F
Bamaxiang	BK.scaffold11569	1663	G	A	BKGENE00500	408	Synonymous	136	T	T
Bamaxiang	BK.scaffold11569	1812	A	T	BKGENE00500	557	Missense	186	H	L
Bamaxiang	BK.scaffold11569	1819	A	G	BKGENE00500	564	Synonymous	188	A	A
Bamaxiang	PI.scaffold441899	4353	A	G	PIGENE17887	2211	Synonymous	737	S	S
Bamaxiang	TP.scaffold5286.1	6299	C	T	TPGENE18461	Unknown	Unknown	Unknown	Unknown	Unknown
Bamaxiang	MS.scaffold48221	7613	G	A	MSGENE14080	Unknown	Unknown	Unknown	Unknown	Unknown
Bamaxiang	LA.scaffold36699	8066	A	G	LAGENE20573	342	Synonymous	114	L	L
Bamaxiang	LA.scaffold1509.2	9777	G	C	LAGENE02135	1236	Synonymous	412	S	S
Bamaxiang	TP.scaffold20773.2	11597	G	T	TPGENE13325	Unknown	Unknown	Unknown	Unknown	Unknown
Bamaxiang	TP.scaffold14066	11916	G	A	TPGENE01475	1137	Synonymous	379	D	D
Bamaxiang	LA.scaffold36699	15491	T	G	LAGENE20573	1024	Missense	342	S	A
Bamaxiang	BK.scaffold16427	18539	C	G	BKGENE02892	1634	Missense	545	W	S
Bamaxiang	TP.scaffold20773.2	19562	G	A	TPGENE13325	Unknown	Unknown	Unknown	Unknown	Unknown
Bamaxiang	TP.scaffold20773.2	21376	T	C	TPGENE13325	Unknown	Unknown	Unknown	Unknown	Unknown
Bamaxiang	TP.scaffold14066	21802	G	A	TPGENE01475	483	Synonymous	161	S	S
Bamaxiang	HA.scaffold34081	23340	C	T	HAGENE13521	1368	Synonymous	456	P	P
Bamaxiang	TP.scaffold19524	24129	G	A	TPGENE08502	781	Missense	261	P	S
Bamaxiang	TP.scaffold19524	24136	G	A	TPGENE08502	774	Synonymous	258	Y	Y
Bamaxiang	TP.scaffold19524	24176	G	A	TPGENE08502	734	Missense	245	T	I
Bamaxiang	BM.scaffold15107	28959	G	A	BMGENE01318	5556	Synonymous	1852	T	T
Bamaxiang	JH.scaffold43429	30107	G	A	JHGENE13627	452	Missense	151	A	V
Bamaxiang	LA.scaffold33963	30413	G	A	LAGENE11695	452	Missense	151	A	V
Bamaxiang	TP.scaffold17638	30494	C	T	TPGENE04310	155	Missense	52	G	E
Bamaxiang	TP.scaffold14066	30495	C	A	TPGENE01475	158	Missense	53	R	L
Bamaxiang	RC.scaffold37233	34444	G	A	RCGENE07779	1527	Synonymous	509	A	A
Bamaxiang	TP.scaffold20182	68721	G	A	TPGENE10897	897	Synonymous	299	A	A
Bamaxiang	HA.scaffold32249	73714	T	C	HAGENE11814	375	stoploss	125	X	W
Bamaxiang	BM.scaffold15107	81110	G	A	BMGENE01318	4122	Synonymous	1374	V	V
Bamaxiang	RC.scaffold53701	83588	C	G	RCGENE15698	386	Missense	129	G	A
Bamaxiang	RC.scaffold53701	83611	G	A	RCGENE15698	363	Synonymous	121	P	P
Bamaxiang	TP.scaffold16280	92970	G	A	TPGENE02845	1503	Synonymous	501	G	G
Bamaxiang	TP.scaffold17266	99296	A	G	TPGENE03832	Unknown	Unknown	Unknown	Unknown	Unknown
Bamaxiang	TP.scaffold17266	99616	G	A	TPGENE03832	Unknown	Unknown	Unknown	Unknown	Unknown
Bamaxiang	PI.scaffold21343.2	102304	G	A	PIGENE20463	781	Missense	261	P	S
Bamaxiang	PI.scaffold21343.2	102311	G	A	PIGENE20463	774	Synonymous	258	Y	Y
Bamaxiang	PI.scaffold21343.2	102351	G	A	PIGENE20463	734	Missense	245	T	I
Bamaxiang	RC.scaffold42399.2	109786	C	G	RCGENE20049	2241	Synonymous	747	T	T
Bamaxiang	TP.scaffold13155.1	110434	C	G	TPGENE01091	705	Missense	235	I	M
Bamaxiang	TP.scaffold19151	112641	G	A	TPGENE07488	2241	Synonymous	747	Y	Y
Bamaxiang	BM.scaffold2255	116285	T	C	BMGENE03776	4647	Synonymous	1549	T	T
Bamaxiang	BK.scaffold22429	119511	T	C	BKGENE06133	465	Synonymous	155	E	E
Bamaxiang	BM.scaffold20461	125412	C	T	BMGENE03092	4140	Synonymous	1380	Y	Y
Bamaxiang	MS.scaffold6447	128380	C	T	MSGENE18718	3945	Synonymous	1315	Y	Y
Bamaxiang	LW.scaffold36769	128736	C	T	LWGENE13829	15	Synonymous	5	G	G
Bamaxiang	TP.scaffold20922	130324	T	C	TPGENE14050	1188	Synonymous	396	S	S
Bamaxiang	TP.scaffold18971	133774	T	C	TPGENE06875	Unknown	Unknown	Unknown	Unknown	Unknown
Bamaxiang	TP.scaffold661	139503	G	A	TPGENE19023	1368	Synonymous	456	P	P
Bamaxiang	TP.scaffold19008.2	140530	A	C	TPGENE07026	138	Synonymous	46	G	G
Bamaxiang	JH.scaffold41997	152709	A	G	JHGENE12924	846	Synonymous	282	S	S
Bamaxiang	BM.scaffold48167	154714	G	A	BMGENE13174	98	Missense	33	C	Y
Bamaxiang	BM.scaffold48167	158732	A	G	BMGENE13174	191	Missense	64	N	S
Bamaxiang	BM.scaffold48167	163631	G	A	BMGENE13174	615	Synonymous	205	V	V
Bamaxiang	TP.scaffold16316.1	175939	T	C	TPGENE02921	921	Synonymous	307	S	S
Bamaxiang	TP.scaffold21538	190466	G	A	TPGENE16867	7383	Synonymous	2461	S	S
Bamaxiang	RC.scaffold41045	192571	A	G	RCGENE20357	Unknown	Unknown	Unknown	Unknown	Unknown
Bamaxiang	LW.scaffold799.2	202761	G	A	LWGENE19096	558	Synonymous	186	D	D
Bamaxiang	RC.scaffold40591	204171	T	G	RCGENE09219	189	Synonymous	63	A	A
Bamaxiang	RC.scaffold40591	204290	A	G	RCGENE09219	308	Missense	103	E	G
Bamaxiang	MS.scaffold26103.3	205217	A	G	MSGENE20514	Unknown	Unknown	Unknown	Unknown	Unknown
Bamaxiang	RC.scaffold13031	225368	T	C	RCGENE01218	4797	Synonymous	1599	T	T
Bamaxiang	MS.scaffold48763	230002	T	C	MSGENE14310	4797	Synonymous	1599	T	T
Bamaxiang	LA.scaffold29315.2	233804	T	C	LAGENE09411	4647	Synonymous	1549	T	T
Bamaxiang	RC.scaffold1537	234831	G	A	RCGENE02019	465	Synonymous	155	T	T
Bamaxiang	TP.scaffold20466	235549	T	C	TPGENE12202	4647	Synonymous	1549	T	T
Bamaxiang	JH.scaffold24273.4	235890	A	G	JHGENE20433	Unknown	Unknown	Unknown	Unknown	Unknown
Bamaxiang	JH.scaffold20949	261732	C	T	JHGENE04023	3921	Synonymous	1307	V	V
Bamaxiang	BK.scaffold30915.2	269945	G	A	BKGENE10613	Unknown	Unknown	Unknown	Unknown	Unknown
Bamaxiang	MS.scaffold51547	300622	C	A	MSGENE16438	2180	Missense	727	P	Q
Bamaxiang	LA.scaffold36289.2	301320	C	T	LAGENE13073	7215	Synonymous	2405	E	E
Bamaxiang	LA.scaffold36289.2	311738	C	A	LAGENE13073	5439	Synonymous	1813	L	L
Bamaxiang	TP.scaffold19790.3	318118	G	T	TPGENE09400	380	Missense	127	G	V
Bamaxiang	TP.scaffold16604	338160	T	C	TPGENE03280	2967	Synonymous	989	Q	Q
Bamaxiang	RC.scaffold6367	344385	A	G	RCGENE18464	1176	Synonymous	392	K	K
Bamaxiang	BM.scaffold19405	344794	C	T	BMGENE02758	1360	Missense	454	A	T
Bamaxiang	TP.scaffold20965	346024	G	A	TPGENE14289	570	Synonymous	190	S	S
Bamaxiang	HA.scaffold25165	351052	T	A	HAGENE07363	3023	Missense	1008	L	Q
Bamaxiang	HA.scaffold25165	351091	A	G	HAGENE07363	3062	Missense	1021	Q	R
Bamaxiang	JH.scaffold29783.2	374046	C	T	JHGENE07109	1098	Synonymous	366	T	T
Bamaxiang	TP.scaffold15730	400289	A	G	TPGENE02284	3144	Synonymous	1048	H	H
Bamaxiang	PI.scaffold17961	408607	C	T	PIGENE03737	2706	Synonymous	902	T	T
Bamaxiang	MS.scaffold52001.2	448536	G	A	MSGENE17081	687	Synonymous	229	T	T
Bamaxiang	HA.scaffold31481	453908	C	T	HAGENE20165	4041	Synonymous	1347	V	V
Bamaxiang	HA.scaffold31481	461620	G	A	HAGENE20165	4473	Synonymous	1491	S	S
Bamaxiang	HA.scaffold35307.2	466151	C	T	HAGENE16741	1659	Synonymous	553	H	H
Bamaxiang	LW.scaffold12863.2	476240	C	T	LWGENE01325	837	Synonymous	279	S	S
Bamaxiang	TP.scaffold19715	544477	A	G	TPGENE09090	64	Missense	22	K	E
Bamaxiang	MS.scaffold4761	576266	A	C	MSGENE13911	7085	Missense	2362	F	C
Bamaxiang	MS.scaffold4761	577585	A	G	MSGENE13911	6836	Missense	2279	V	A
Bamaxiang	MS.scaffold5849	582151	G	C	MSGENE18479	3549	Missense	1183	H	Q
Bamaxiang	MS.scaffold4761	588382	A	C	MSGENE13911	4896	Synonymous	1632	L	L
Bamaxiang	PI.scaffold36741	647710	T	C	PIGENE20704	Unknown	Unknown	Unknown	Unknown	Unknown
Bamaxiang	LW.scaffold14181	655930	A	C	LWGENE01985	1298	Missense	433	Q	P
Bamaxiang	BK.scaffold26833	657312	C	T	BKGENE08273	5364	Synonymous	1788	L	L
Bamaxiang	MS.scaffold32923	666391	C	T	MSGENE07504	438	Synonymous	146	P	P
Bamaxiang	BM.scaffold47547	708634	C	T	BMGENE12981	3132	Synonymous	1044	K	K
Bamaxiang	BM.scaffold47547	708676	C	G	BMGENE12981	3090	Synonymous	1030	R	R
Bamaxiang	BM.scaffold47547	710523	G	A	BMGENE12981	2820	Synonymous	940	T	T
Bamaxiang	TP.scaffold4528	740478	G	A	TPGENE18114	1779	Synonymous	593	C	C
Bamaxiang	HA.scaffold3463	774186	C	T	HAGENE14787	297	Synonymous	99	A	A
Bamaxiang	TP.scaffold8062	778130	T	A	TPGENE20399	144	Synonymous	48	I	I
Bamaxiang	TP.scaffold12096	787729	G	C	TPGENE00781	1383	Synonymous	461	S	S
Bamaxiang	TP.scaffold12096	788552	C	T	TPGENE00781	1572	Synonymous	524	D	D
Bamaxiang	LA.scaffold25429.2	864355	C	G	LAGENE07371	3207	Synonymous	1069	P	P
Bamaxiang	LA.scaffold25429.2	864842	G	A	LAGENE07371	3259	Missense	1087	V	I
Bamaxiang	HA.scaffold16511.3	869460	C	T	HAGENE02714	1008	Synonymous	336	A	A
Bamaxiang	LA.scaffold25429.2	885064	A	G	LAGENE07371	10491	Synonymous	3497	S	S
Bamaxiang	LW.scaffold21571	885713	G	C	LWGENE05277	64	Missense	22	G	R
Bamaxiang	MS.scaffold16693	886770	T	C	MSGENE02189	712	Missense	238	T	A
Bamaxiang	MS.scaffold16693	886816	C	T	MSGENE02189	666	Synonymous	222	A	A
Bamaxiang	MS.scaffold16693	886822	G	C	MSGENE02189	660	Synonymous	220	V	V
Bamaxiang	LW.scaffold14503.4	891438	C	T	LWGENE02121	2346	Synonymous	782	P	P
Bamaxiang	LW.scaffold34847	946990	G	A	LWGENE12581	1266	Synonymous	422	I	I
Bamaxiang	LW.scaffold34847	947025	G	A	LWGENE12581	1231	Missense	411	P	S
Bamaxiang	BK.scaffold5155	947261	C	T	BKGENE17957	339	Synonymous	113	Y	Y
Bamaxiang	MS.scaffold4761	1008083	G	C	MSGENE13934	4242	Synonymous	1414	A	A
Bamaxiang	BM.scaffold38317	1056894	T	C	BMGENE09203	800	Missense	267	N	S
Bamaxiang	TP.scaffold2033	1061957	G	C	TPGENE20261	2880	Missense	960	L	F
Bamaxiang	BM.scaffold38317	1090815	C	T	BMGENE09203	179	Missense	60	G	E
Bamaxiang	TP.scaffold20469.1	1114715	A	G	TPGENE12222	1324	Missense	442	I	V
Bamaxiang	BM.scaffold12731.5	1196802	T	C	BMGENE00881	292	Synonymous	98	L	L
Bamaxiang	BM.scaffold28319	1202571	A	G	BMGENE20573	Unknown	Unknown	Unknown	Unknown	Unknown
Bamaxiang	PI.scaffold17313.3	1306820	T	C	PIGENE03383	1520	Missense	507	K	R
Bamaxiang	TP.scaffold19759	1322106	C	T	TPGENE09272	Unknown	Unknown	Unknown	Unknown	Unknown
Bamaxiang	TP.scaffold20124	1353561	G	A	TPGENE10595	309	Synonymous	103	K	K
Bamaxiang	BM.scaffold16889.2	1404756	A	G	BMGENE01841	549	Synonymous	183	A	A
Bamaxiang	RC.scaffold38605	1454903	G	A	RCGENE08299	1011	Synonymous	337	A	A
Bamaxiang	LA.scaffold7867	1534931	G	A	LAGENE19442	1782	Synonymous	594	N	N
Bamaxiang	BM.scaffold52865	1571489	G	T	BMGENE16943	1810	Missense	604	A	S
Bamaxiang	BM.scaffold52865	1578501	G	A	BMGENE16943	2736	Synonymous	912	P	P
Bamaxiang	BM.scaffold52865	1579641	T	C	BMGENE16943	3096	Synonymous	1032	D	D
Bamaxiang	HA.scaffold34643.1	1686698	A	C	HAGENE20310	189	Synonymous	63	A	A
Bamaxiang	HA.scaffold5803	1706241	C	T	HAGENE18302	567	Synonymous	189	D	D
Bamaxiang	LW.scaffold29805	2072584	A	G	LWGENE09323	4797	Synonymous	1599	T	T
Bamaxiang	HA.scaffold8787.2	2079394	G	A	HAGENE19451	507	Synonymous	169	A	A
Bamaxiang	HA.scaffold8787.2	2079704	A	G	HAGENE19451	627	Synonymous	209	T	T
Bamaxiang	HA.scaffold33973.1	2084008	C	T	HAGENE13271	3441	Synonymous	1147	S	S
Bamaxiang	HA.scaffold33973.1	2086241	G	A	HAGENE13271	4152	Synonymous	1384	K	K
Bamaxiang	HA.scaffold33973.1	2086244	C	T	HAGENE13271	4155	Synonymous	1385	Y	Y
Bamaxiang	RC.scaffold53751	2268994	A	G	RCGENE15775	1809	Synonymous	603	R	R
Bamaxiang	JH.scaffold511	2470199	G	A	JHGENE18558	3633	Synonymous	1211	L	L
Bamaxiang	PI.scaffold947	2484323	G	C	PIGENE19918	1029	Synonymous	343	G	G
Bamaxiang	PI.scaffold947	2484326	C	T	PIGENE19918	1026	Synonymous	342	G	G
Bamaxiang	RC.scaffold36629	2768942	T	C	RCGENE07580	300	Synonymous	100	R	R
Bamaxiang	LA.scaffold37833	2773368	G	A	LAGENE14414	495	Synonymous	165	D	D
Bamaxiang	RC.scaffold36629	2774257	G	A	RCGENE07580	1014	Synonymous	338	Q	Q
Bamaxiang	LW.scaffold37831.1	3178501	C	T	LWGENE15682	1329	Synonymous	443	G	G
Bamaxiang	RC.scaffold44959	5244313	C	T	RCGENE10869	240	Synonymous	80	L	L
Bamaxiang	LW.scaffold5907	5764795	G	A	LWGENE17879	309	Synonymous	103	P	P
Bamaxiang	HA.scaffold9447.3	5804666	T	C	HAGENE19890	3978	Synonymous	1326	I	I
Bamaxiang	LW.scaffold36843	8902095	G	A	LWGENE14016	1455	Synonymous	485	A	A
Erhualian	BM.scaffold50815	174	A	G	BMGENE14521	Unknown	Unknown	Unknown	Unknown	Unknown
Erhualian	TP.scaffold161734	530	T	C	TPGENE02752	835	Missense	279	I	V
Erhualian	TP.scaffold161734	627	A	T	TPGENE02752	738	Synonymous	246	A	A
Erhualian	TP.scaffold161734	1104	A	G	TPGENE02752	261	Synonymous	87	Y	Y
Erhualian	TP.scaffold161734	1151	T	C	TPGENE02752	214	Missense	72	I	V
Erhualian	TP.scaffold161734	1167	A	G	TPGENE02752	198	Synonymous	66	D	D
Erhualian	TP.scaffold161734	1289	T	C	TPGENE02752	76	Missense	26	S	G
Erhualian	JH.scaffold44831	3526	G	A	JHGENE15912	1468	Missense	490	R	C
Erhualian	TP.scaffold5286.1	5535	C	T	TPGENE18461	Unknown	Unknown	Unknown	Unknown	Unknown
Erhualian	TP.scaffold5286.1	6299	C	T	TPGENE18461	Unknown	Unknown	Unknown	Unknown	Unknown
Erhualian	BM.scaffold49529	8535	C	T	BMGENE13985	Unknown	Unknown	Unknown	Unknown	Unknown
Erhualian	PI.scaffold34289	9596	G	A	PIGENE12490	375	Synonymous	125	T	T
Erhualian	LA.scaffold36699	15491	T	G	LAGENE20573	1024	Missense	342	S	A
Erhualian	BM.scaffold52921	29947	G	A	BMGENE20838	183	Synonymous	61	V	V
Erhualian	BM.scaffold52921	30010	T	C	BMGENE20838	120	Synonymous	40	T	T
Erhualian	TP.scaffold17638	30494	C	T	TPGENE04310	155	Missense	52	G	E
Erhualian	MS.scaffold6447	34990	C	G	MSGENE18718	586	Missense	196	L	V
Erhualian	TP.scaffold5913	58882	C	T	TPGENE18677	219	Synonymous	73	L	L
Erhualian	TP.scaffold5913	58894	A	C	TPGENE18677	207	Synonymous	69	L	L
Erhualian	TP.scaffold21244	70039	G	C	TPGENE15737	19	Missense	7	G	R
Erhualian	LW.scaffold30983	70633	A	G	LWGENE09925	270	Synonymous	90	H	H
Erhualian	BM.scaffold44573	83669	C	T	BMGENE20721	725	Missense	242	T	M
Erhualian	BM.scaffold53273	89944	T	C	BMGENE18053	Unknown	Unknown	Unknown	Unknown	Unknown
Erhualian	TP.scaffold20922	130324	T	C	TPGENE14050	1188	Synonymous	396	S	S
Erhualian	TP.scaffold20922	130363	G	A	TPGENE14050	1227	Synonymous	409	E	E
Erhualian	TP.scaffold17700.1	134730	A	G	TPGENE04410	297	Synonymous	99	L	L
Erhualian	TP.scaffold19008.2	140530	A	C	TPGENE07026	138	Synonymous	46	G	G
Erhualian	TP.scaffold20257	142821	G	A	TPGENE11243	3411	Synonymous	1137	C	C
Erhualian	TP.scaffold20257	149785	G	A	TPGENE11243	2025	Synonymous	675	G	G
Erhualian	BM.scaffold48167	154714	G	A	BMGENE13174	98	Missense	33	C	Y
Erhualian	TP.scaffold20257	156306	C	T	TPGENE11243	564	Synonymous	188	P	P
Erhualian	BM.scaffold48167	158732	A	G	BMGENE13174	191	Missense	64	N	S
Erhualian	BM.scaffold48167	163631	G	A	BMGENE13174	615	Synonymous	205	V	V
Erhualian	LW.scaffold8089	166665	C	T	LWGENE19117	1650	Synonymous	550	T	T
Erhualian	LW.scaffold8089	166677	G	C	LWGENE19117	1638	Synonymous	546	T	T
Erhualian	LW.scaffold8089	166869	C	T	LWGENE19117	1446	Synonymous	482	V	V
Erhualian	LW.scaffold8089	167253	C	A	LWGENE19117	1062	Synonymous	354	V	V
Erhualian	LW.scaffold8089	167652	G	T	LWGENE19117	663	Synonymous	221	I	I
Erhualian	LW.scaffold8089	167985	G	A	LWGENE19117	330	Synonymous	110	G	G
Erhualian	MS.scaffold51547	212458	C	T	MSGENE16438	573	Synonymous	191	A	A
Erhualian	HA.scaffold27963	258336	C	T	HAGENE09148	Unknown	Unknown	Unknown	Unknown	Unknown
Erhualian	TP.scaffold21254.1	271364	A	G	TPGENE15791	530	Missense	177	N	S
Erhualian	BM.scaffold32565	273183	T	C	BMGENE07068	61	Missense	21	N	D
Erhualian	BM.scaffold32565	273203	T	C	BMGENE07068	41	Missense	14	K	R
Erhualian	BM.scaffold4875	294195	G	A	BMGENE13349	1419	Synonymous	473	D	D
Erhualian	TP.scaffold21254.1	296989	C	T	TPGENE15791	1824	Synonymous	608	F	F
Erhualian	LA.scaffold36289.2	301320	C	T	LAGENE13073	7215	Synonymous	2405	E	E
Erhualian	LA.scaffold36289.2	311738	C	A	LAGENE13073	5439	Synonymous	1813	L	L
Erhualian	JH.scaffold45173	336208	A	G	JHGENE16797	6399	Synonymous	2133	P	P
Erhualian	JH.scaffold45173	337190	A	G	JHGENE16797	5417	Missense	1806	V	A
Erhualian	BM.scaffold26369	339198	T	C	BMGENE05061	5806	Missense	1936	N	D
Erhualian	JH.scaffold45173	340180	C	T	JHGENE16797	2427	Synonymous	809	T	T
Erhualian	JH.scaffold45173	341603	G	A	JHGENE16797	1004	Missense	335	A	V
Erhualian	BM.scaffold26369	342577	C	T	BMGENE05061	2427	Synonymous	809	T	T
Erhualian	BM.scaffold26369	344000	G	A	BMGENE05061	1004	Missense	335	A	V
Erhualian	HA.scaffold31481	396305	C	T	HAGENE20165	53	Missense	18	T	I
Erhualian	BM.scaffold6001	398363	G	A	BMGENE18772	1134	Synonymous	378	L	L
Erhualian	TP.scaffold7214	402350	G	A	TPGENE19258	306	Synonymous	102	T	T
Erhualian	HA.scaffold31481	453908	C	T	HAGENE20165	4041	Synonymous	1347	V	V
Erhualian	HA.scaffold31481	461620	G	A	HAGENE20165	4473	Synonymous	1491	S	S
Erhualian	BM.scaffold44925	484059	G	A	BMGENE11811	3666	Synonymous	1222	E	E
Erhualian	LA.scaffold9703.1	485969	G	A	LAGENE19962	1613	Missense	538	T	I
Erhualian	HA.scaffold31481	486046	C	T	HAGENE20165	6594	Synonymous	2198	I	I
Erhualian	RC.scaffold15347.2	521347	T	C	RCGENE02015	105	Synonymous	35	N	N
Erhualian	BM.scaffold36937.2	525029	T	C	BMGENE08708	759	Synonymous	253	Y	Y
Erhualian	BM.scaffold36937.2	525032	T	C	BMGENE08708	762	Synonymous	254	A	A
Erhualian	HA.scaffold31481	530013	T	G	HAGENE11351	477	Synonymous	159	V	V
Erhualian	BM.scaffold52839.3	536193	G	A	BMGENE16860	1006	Missense	336	L	F
Erhualian	RC.scaffold45843	581713	C	T	RCGENE11238	1623	Synonymous	541	D	D
Erhualian	LW.scaffold37611	594811	G	A	LWGENE15314	423	Synonymous	141	D	D
Erhualian	TP.scaffold20257	612944	G	A	TPGENE11267	444	Synonymous	148	G	G
Erhualian	TP.scaffold20257	613517	C	T	TPGENE11267	729	Synonymous	243	F	F
Erhualian	RC.scaffold49837	615654	T	G	RCGENE12872	562	Missense	188	C	G
Erhualian	MS.scaffold47115	678479	C	T	MSGENE13481	1152	Synonymous	384	A	A
Erhualian	MS.scaffold32923	680146	A	C	MSGENE07504	1596	Synonymous	532	R	R
Erhualian	BM.scaffold44397.3	720632	G	A	BMGENE11678	Unknown	Unknown	Unknown	Unknown	Unknown
Erhualian	BM.scaffold44397.3	720685	G	A	BMGENE11678	Unknown	Unknown	Unknown	Unknown	Unknown
Erhualian	BM.scaffold44397.3	720781	C	T	BMGENE11678	Unknown	Unknown	Unknown	Unknown	Unknown
Erhualian	MS.scaffold39853	760440	A	G	MSGENE09763	293	Missense	98	H	R
Erhualian	TP.scaffold17861	773732	G	A	TPGENE04774	78	Synonymous	26	P	P
Erhualian	LW.scaffold21571	885713	G	C	LWGENE05277	64	Missense	22	G	R
Erhualian	BM.scaffold48785.1	918453	C	T	BMGENE13379	1249	Missense	417	R	C
Erhualian	BM.scaffold33125.3	962522	T	C	BMGENE07313	793	Missense	265	I	V
Erhualian	LW.scaffold30983	966297	T	C	LWGENE09928	435	Synonymous	145	E	E
Erhualian	LW.scaffold30983	966432	A	G	LWGENE09928	300	Synonymous	100	T	T
Erhualian	LW.scaffold30983	966458	T	C	LWGENE09928	274	Missense	92	I	V
Erhualian	BM.scaffold33125.3	978236	T	C	BMGENE07313	228	Synonymous	76	E	E
Erhualian	RC.scaffold1923	997486	A	G	RCGENE02929	Unknown	Unknown	Unknown	Unknown	Unknown
Erhualian	TP.scaffold2033	1028730	A	G	TPGENE20261	1171	Missense	391	I	V
Erhualian	JH.scaffold45291	1113024	A	C	JHGENE17178	1236	Synonymous	412	R	R
Erhualian	LW.scaffold36305	1173331	A	C	LWGENE13477	2529	Synonymous	843	R	R
Erhualian	LW.scaffold12835.2	1205077	C	G	LWGENE01246	601	Missense	201	L	V
Erhualian	TP.scaffold19759	1322106	C	T	TPGENE09272	Unknown	Unknown	Unknown	Unknown	Unknown
Erhualian	BM.scaffold47439	1370058	G	A	BMGENE20739	432	Synonymous	144	I	I
Erhualian	BM.scaffold51727	1428608	G	T	BMGENE15108	909	Synonymous	303	L	L
Erhualian	LA.scaffold7867	1534931	G	A	LAGENE19442	1782	Synonymous	594	N	N
Erhualian	BM.scaffold52865	1577698	A	G	BMGENE16943	2406	Synonymous	802	S	S
Erhualian	JH.scaffold45547	1794172	T	G	JHGENE17998	718	Missense	240	F	V
Erhualian	BM.scaffold46633.2	1803848	A	G	BMGENE12629	3054	Synonymous	1018	D	D
Erhualian	BM.scaffold46633.2	1803854	A	G	BMGENE12629	3048	Synonymous	1016	H	H
Erhualian	BM.scaffold53253	2374908	G	A	BMGENE17964	1431	Synonymous	477	A	A
Erhualian	JH.scaffold21023	2386287	A	C	JHGENE04132	261	Synonymous	87	S	S
Erhualian	JH.scaffold21023	2426690	G	A	JHGENE04132	3111	Synonymous	1037	E	E
Erhualian	RC.scaffold49837	2445843	A	G	RCGENE12924	611	Missense	204	V	A
Erhualian	LW.scaffold5271	2479748	C	T	LWGENE17500	1017	Synonymous	339	P	P
Erhualian	LW.scaffold27387.3	3238452	C	T	LWGENE07931	602	Missense	201	P	L
Erhualian	BM.scaffold23089	4180753	G	A	BMGENE03930	3372	Synonymous	1124	N	N
Erhualian	LW.scaffold6077.1	5210818	C	T	LWGENE17931	Unknown	Unknown	Unknown	Unknown	Unknown
Erhualian	LW.scaffold5907	5766237	G	C	LWGENE17879	45	Synonymous	15	A	A
Erhualian	LW.scaffold5907	5766249	G	A	LWGENE17879	33	Synonymous	11	P	P
Hetao	MS.scaffold688343	243	C	T	MSGENE19228	120	Synonymous	40	Y	Y
Hetao	TP.scaffold161734	530	T	C	TPGENE02752	835	Missense	279	I	V
Hetao	TP.scaffold161734	627	A	T	TPGENE02752	738	Synonymous	246	A	A
Hetao	TP.scaffold161734	1104	A	G	TPGENE02752	261	Synonymous	87	Y	Y
Hetao	TP.scaffold161734	1151	T	C	TPGENE02752	214	Missense	72	I	V
Hetao	TP.scaffold161734	1167	A	G	TPGENE02752	198	Synonymous	66	D	D
Hetao	BK.scaffold36311	1272	C	A	BKGENE14287	379	Synonymous	127	R	R
Hetao	TP.scaffold161734	1289	T	C	TPGENE02752	76	Missense	26	S	G
Hetao	BK.scaffold36311	1445	C	T	BKGENE14287	552	Synonymous	184	Y	Y
Hetao	BK.scaffold36311	1446	T	C	BKGENE14287	553	Missense	185	F	L
Hetao	BK.scaffold36311	1448	A	T	BKGENE14287	555	Synonymous	185	L	L
Hetao	JH.scaffold44831	3526	G	A	JHGENE15912	1468	Missense	490	R	C
Hetao	TP.scaffold5286.1	6299	C	T	TPGENE18461	Unknown	Unknown	Unknown	Unknown	Unknown
Hetao	BM.scaffold49529	8535	C	T	BMGENE13985	Unknown	Unknown	Unknown	Unknown	Unknown
Hetao	TP.scaffold20773.2	11597	G	T	TPGENE13325	Unknown	Unknown	Unknown	Unknown	Unknown
Hetao	TP.scaffold21285.3	12245	C	A	TPGENE15935	Unknown	Unknown	Unknown	Unknown	Unknown
Hetao	TP.scaffold20773.2	19562	G	A	TPGENE13325	Unknown	Unknown	Unknown	Unknown	Unknown
Hetao	TP.scaffold20773.2	21376	T	C	TPGENE13325	Unknown	Unknown	Unknown	Unknown	Unknown
Hetao	TP.scaffold17638	30494	C	T	TPGENE04310	155	Missense	52	G	E
Hetao	TP.scaffold13275	40869	T	C	TPGENE01143	810	Synonymous	270	K	K
Hetao	LA.scaffold38905	55974	C	T	LAGENE20277	800	Missense	267	R	K
Hetao	LA.scaffold38905	55979	G	A	LAGENE20277	795	Synonymous	265	S	S
Hetao	LW.scaffold30983	70633	A	G	LWGENE09925	270	Synonymous	90	H	H
Hetao	HA.scaffold32249	73714	T	C	HAGENE11814	375	stoploss	125	X	W
Hetao	TP.scaffold19151	75947	G	A	TPGENE07488	3273	Synonymous	1091	N	N
Hetao	TP.scaffold20182	80427	G	A	TPGENE10897	1932	Synonymous	644	P	P
Hetao	TP.scaffold21538	88621	G	A	TPGENE16864	714	Synonymous	238	N	N
Hetao	TP.scaffold20989	99192	T	C	TPGENE14383	1055	Missense	352	L	S
Hetao	TP.scaffold17266	99215	C	T	TPGENE03832	Unknown	Unknown	Unknown	Unknown	Unknown
Hetao	TP.scaffold17266	99296	A	G	TPGENE03832	Unknown	Unknown	Unknown	Unknown	Unknown
Hetao	TP.scaffold20989	101323	G	A	TPGENE14383	1130	Missense	377	R	K
Hetao	TP.scaffold20989	103299	G	A	TPGENE14383	2479	Missense	827	D	N
Hetao	BM.scaffold20461	121113	G	T	BMGENE03092	3687	Synonymous	1229	L	L
Hetao	MS.scaffold6447	124176	G	T	MSGENE18718	3492	Synonymous	1164	L	L
Hetao	BK.scaffold30915.2	139396	C	T	BKGENE10613	Unknown	Unknown	Unknown	Unknown	Unknown
Hetao	HA.scaffold34539.2	146582	C	T	HAGENE14598	3752	Missense	1251	T	M
Hetao	JH.scaffold41997	152709	A	G	JHGENE12924	846	Synonymous	282	S	S
Hetao	BM.scaffold20461	160582	C	T	BMGENE03092	5172	Synonymous	1724	N	N
Hetao	LW.scaffold8089	166665	C	T	LWGENE19117	1650	Synonymous	550	T	T
Hetao	LW.scaffold8089	166677	G	C	LWGENE19117	1638	Synonymous	546	T	T
Hetao	LW.scaffold8089	166869	C	T	LWGENE19117	1446	Synonymous	482	V	V
Hetao	LW.scaffold8089	167253	C	A	LWGENE19117	1062	Synonymous	354	V	V
Hetao	LW.scaffold8089	167652	G	T	LWGENE19117	663	Synonymous	221	I	I
Hetao	LW.scaffold8089	167985	G	A	LWGENE19117	330	Synonymous	110	G	G
Hetao	LW.scaffold799.2	202761	G	A	LWGENE19096	558	Synonymous	186	D	D
Hetao	TP.scaffold20989	211329	G	A	TPGENE14389	256	Missense	86	A	T
Hetao	BK.scaffold30915.2	234870	G	A	BKGENE10613	Unknown	Unknown	Unknown	Unknown	Unknown
Hetao	TP.scaffold20989	238322	T	C	TPGENE14390	204	Synonymous	68	I	I
Hetao	TP.scaffold12319	263662	C	T	TPGENE00878	777	Synonymous	259	V	V
Hetao	TP.scaffold12319	264544	G	A	TPGENE00878	381	Synonymous	127	G	G
Hetao	TP.scaffold21254.1	271364	A	G	TPGENE15791	530	Missense	177	N	S
Hetao	BK.scaffold30915.2	274153	C	A	BKGENE10613	Unknown	Unknown	Unknown	Unknown	Unknown
Hetao	LA.scaffold16041.1	314224	C	G	LAGENE02541	Unknown	Unknown	Unknown	Unknown	Unknown
Hetao	JH.scaffold45173	336208	A	G	JHGENE16797	6399	Synonymous	2133	P	P
Hetao	JH.scaffold45173	336802	G	A	JHGENE16797	5805	Synonymous	1935	G	G
Hetao	JH.scaffold45173	337190	A	G	JHGENE16797	5417	Missense	1806	V	A
Hetao	LA.scaffold25765.2	337418	A	G	LAGENE07592	2305	Missense	769	S	G
Hetao	BM.scaffold26369	338495	G	A	BMGENE05061	6331	Synonymous	2111	L	L
Hetao	BM.scaffold26369	339587	A	G	BMGENE05061	5417	Missense	1806	V	A
Hetao	JH.scaffold45173	340180	C	T	JHGENE16797	2427	Synonymous	809	T	T
Hetao	JH.scaffold45173	341603	G	A	JHGENE16797	1004	Missense	335	A	V
Hetao	BM.scaffold26369	342577	C	T	BMGENE05061	2427	Synonymous	809	T	T
Hetao	BM.scaffold26369	344000	G	A	BMGENE05061	1004	Missense	335	A	V
Hetao	HA.scaffold25165	348608	G	A	HAGENE07363	2960	Missense	987	S	N
Hetao	TP.scaffold20315	378892	G	A	TPGENE11521	207	Synonymous	69	P	P
Hetao	BK.scaffold30915.2	407472	T	C	BKGENE10613	Unknown	Unknown	Unknown	Unknown	Unknown
Hetao	TP.scaffold15678.3	437617	C	T	TPGENE02223	3761	Missense	1254	T	M
Hetao	JH.scaffold21829	479976	C	T	JHGENE04452	1347	Synonymous	449	V	V
Hetao	BM.scaffold45505	580249	A	G	BMGENE12178	534	Synonymous	178	A	A
Hetao	BM.scaffold45505	580264	T	C	BMGENE12178	519	Synonymous	173	T	T
Hetao	BM.scaffold45505	580312	G	A	BMGENE12178	471	Synonymous	157	P	P
Hetao	MS.scaffold5849	583242	T	C	MSGENE18479	2458	Missense	820	T	A
Hetao	MS.scaffold32923	680146	A	C	MSGENE07504	1596	Synonymous	532	R	R
Hetao	TP.scaffold18651.2	731742	G	C	TPGENE06160	1836	Synonymous	612	A	A
Hetao	JH.scaffold40845	747316	C	T	JHGENE12046	3752	Missense	1251	T	M
Hetao	RC.scaffold53985.1	759993	A	T	RCGENE16240	30	Synonymous	10	I	I
Hetao	HA.scaffold16511.3	869460	C	T	HAGENE02714	1008	Synonymous	336	A	A
Hetao	BK.scaffold5155	947261	C	T	BKGENE17957	339	Synonymous	113	Y	Y
Hetao	LW.scaffold30983	966297	T	C	LWGENE09928	435	Synonymous	145	E	E
Hetao	LW.scaffold30983	966432	A	G	LWGENE09928	300	Synonymous	100	T	T
Hetao	LW.scaffold30983	966458	T	C	LWGENE09928	274	Missense	92	I	V
Hetao	BM.scaffold38317	1056894	T	C	BMGENE09203	800	Missense	267	N	S
Hetao	JH.scaffold45291	1113024	A	C	JHGENE17178	1236	Synonymous	412	R	R
Hetao	LW.scaffold36305	1173331	A	C	LWGENE13477	2529	Synonymous	843	R	R
Hetao	LW.scaffold12835.2	1205077	C	G	LWGENE01246	601	Missense	201	L	V
Hetao	TP.scaffold18651.2	1294334	C	G	TPGENE06175	1335	Synonymous	445	G	G
Hetao	LA.scaffold2823	1299271	G	A	LAGENE08757	Unknown	Unknown	Unknown	Unknown	Unknown
Hetao	LA.scaffold2823	1299306	A	T	LAGENE08757	Unknown	Unknown	Unknown	Unknown	Unknown
Hetao	LA.scaffold2823	1299373	T	C	LAGENE08757	Unknown	Unknown	Unknown	Unknown	Unknown
Hetao	LA.scaffold2823	1299382	G	A	LAGENE08757	Unknown	Unknown	Unknown	Unknown	Unknown
Hetao	LA.scaffold2823	1299427	A	G	LAGENE08757	Unknown	Unknown	Unknown	Unknown	Unknown
Hetao	LA.scaffold2823	1300030	T	C	LAGENE08757	Unknown	Unknown	Unknown	Unknown	Unknown
Hetao	LA.scaffold2823	1300069	A	G	LAGENE08757	Unknown	Unknown	Unknown	Unknown	Unknown
Hetao	LA.scaffold2823	1300081	A	G	LAGENE08757	Unknown	Unknown	Unknown	Unknown	Unknown
Hetao	LA.scaffold2823	1300139	G	A	LAGENE08757	Unknown	Unknown	Unknown	Unknown	Unknown
Hetao	LA.scaffold2823	1300310	T	A	LAGENE08757	Unknown	Unknown	Unknown	Unknown	Unknown
Hetao	LA.scaffold2823	1305456	T	C	LAGENE08757	Unknown	Unknown	Unknown	Unknown	Unknown
Hetao	BM.scaffold47439	1363052	C	T	BMGENE20739	873	Synonymous	291	T	T
Hetao	MS.scaffold23275	1388044	G	A	MSGENE04694	39	Synonymous	13	G	G
Hetao	BM.scaffold51727	1416746	C	T	BMGENE15108	620	Missense	207	A	V
Hetao	BM.scaffold52865	1571489	G	T	BMGENE16943	1810	Missense	604	A	S
Hetao	BM.scaffold52865	1578501	G	A	BMGENE16943	2736	Synonymous	912	P	P
Hetao	BM.scaffold52865	1579641	T	C	BMGENE16943	3096	Synonymous	1032	D	D
Hetao	HA.scaffold21095	1694939	G	T	HAGENE04704	3879	Synonymous	1293	L	L
Hetao	JH.scaffold21927	1808421	G	A	JHGENE04533	870	Synonymous	290	Q	Q
Hetao	BM.scaffold5915	2010892	A	G	BMGENE18709	1047	Synonymous	349	P	P
Hetao	PI.scaffold27283	2242049	C	T	PIGENE08195	Unknown	Unknown	Unknown	Unknown	Unknown
Hetao	BK.scaffold33219.2	2301027	C	T	BKGENE11872	171	Synonymous	57	V	V
Hetao	JH.scaffold21023	2426690	G	A	JHGENE04132	3111	Synonymous	1037	E	E
Hetao	BK.scaffold17413.3	2675329	A	G	BKGENE03178	1035	Synonymous	345	Y	Y
Hetao	LA.scaffold29173	2715942	T	C	LAGENE09256	661	Missense	221	S	P
Hetao	LA.scaffold29173	2724853	G	A	LAGENE09256	1277	Missense	426	G	D
Hetao	MS.scaffold29287	2756167	C	T	MSGENE06383	165	Synonymous	55	P	P
Hetao	RC.scaffold36629	2768942	T	C	RCGENE07580	300	Synonymous	100	R	R
Hetao	RC.scaffold37899	2837877	C	T	RCGENE08028	1075	Missense	359	A	T
Hetao	LW.scaffold18253.6	2989904	G	A	LWGENE03889	170	Missense	57	G	E
Hetao	LW.scaffold18253.6	2990514	C	T	LWGENE03889	780	Synonymous	260	L	L
Hetao	LW.scaffold18253.6	2990643	A	G	LWGENE03889	909	Synonymous	303	L	L
Hetao	LW.scaffold6077.1	5207765	C	T	LWGENE17931	Unknown	Unknown	Unknown	Unknown	Unknown
Hetao	LW.scaffold6077.1	5210818	C	T	LWGENE17931	Unknown	Unknown	Unknown	Unknown	Unknown
Hetao	LW.scaffold6077.1	5214716	C	T	LWGENE17931	Unknown	Unknown	Unknown	Unknown	Unknown
Hetao	LW.scaffold36843	8902095	G	A	LWGENE14016	1455	Synonymous	485	A	A
Laiwu	TP.scaffold161734	530	T	C	TPGENE02752	835	Missense	279	I	V
Laiwu	TP.scaffold161734	627	A	T	TPGENE02752	738	Synonymous	246	A	A
Laiwu	HA.scaffold5619	814	G	A	HAGENE18256	585	Synonymous	195	L	L
Laiwu	HA.scaffold5619	953	C	T	HAGENE18256	446	Missense	149	G	E
Laiwu	TP.scaffold161734	1104	A	G	TPGENE02752	261	Synonymous	87	Y	Y
Laiwu	TP.scaffold161734	1151	T	C	TPGENE02752	214	Missense	72	I	V
Laiwu	TP.scaffold161734	1167	A	G	TPGENE02752	198	Synonymous	66	D	D
Laiwu	TP.scaffold161734	1289	T	C	TPGENE02752	76	Missense	26	S	G
Laiwu	MS.scaffold688343	2016	G	A	MSGENE19228	501	Synonymous	167	G	G
Laiwu	LA.scaffold36699	6068	T	C	LAGENE20573	214	Synonymous	72	L	L
Laiwu	TP.scaffold5286.1	6383	A	C	TPGENE18461	Unknown	Unknown	Unknown	Unknown	Unknown
Laiwu	LA.scaffold36699	8066	A	G	LAGENE20573	342	Synonymous	114	L	L
Laiwu	PI.scaffold24247	8481	G	A	PIGENE06231	197	Missense	66	R	Q
Laiwu	HA.scaffold34081	9648	C	T	HAGENE13521	196	Missense	66	R	X
Laiwu	HA.scaffold34081	10345	C	T	HAGENE13521	266	Missense	89	A	V
Laiwu	PI.scaffold37005	10939	A	G	PIGENE17058	882	Synonymous	294	V	V
Laiwu	PI.scaffold37005	10942	A	G	PIGENE17058	879	Synonymous	293	C	C
Laiwu	PI.scaffold24247	11481	A	G	PIGENE06231	550	Missense	184	I	V
Laiwu	PI.scaffold31957.2	14013	G	A	PIGENE10738	770	Missense	257	R	Q
Laiwu	LA.scaffold36699	15491	T	G	LAGENE20573	1024	Missense	342	S	A
Laiwu	LA.scaffold36699	15504	G	C	LAGENE20573	1037	Missense	346	C	S
Laiwu	LA.scaffold36699	15585	A	G	LAGENE20573	1118	Missense	373	H	R
Laiwu	BK.scaffold21661	16977	G	T	BKGENE05442	1291	Synonymous	431	R	R
Laiwu	HA.scaffold34081	23379	G	A	HAGENE13521	1407	Synonymous	469	A	A
Laiwu	BM.scaffold32307	23787	T	C	BMGENE07001	195	Synonymous	65	S	S
Laiwu	TP.scaffold17638	30494	C	T	TPGENE04310	155	Missense	52	G	E
Laiwu	HA.scaffold35163	64692	G	A	HAGENE16365	323	Missense	108	R	H
Laiwu	LW.scaffold30983	70633	A	G	LWGENE09925	270	Synonymous	90	H	H
Laiwu	TP.scaffold21538	84575	C	G	TPGENE16864	1983	Synonymous	661	G	G
Laiwu	TP.scaffold21538	85688	G	A	TPGENE16864	1398	Synonymous	466	F	F
Laiwu	TP.scaffold582.1	91721	C	T	TPGENE18595	3423	Synonymous	1141	S	S
Laiwu	LW.scaffold38009	108529	G	A	LWGENE16435	542	Missense	181	G	E
Laiwu	TP.scaffold21244	111838	T	C	TPGENE15737	864	Synonymous	288	H	H
Laiwu	LW.scaffold38009	116453	G	A	LWGENE16435	1885	Missense	629	E	K
Laiwu	RC.scaffold37769.1	128988	G	A	RCGENE20309	Unknown	Unknown	Unknown	Unknown	Unknown
Laiwu	TP.scaffold20257	149785	G	A	TPGENE11243	2025	Synonymous	675	G	G
Laiwu	JH.scaffold41997	152709	A	G	JHGENE12924	846	Synonymous	282	S	S
Laiwu	TP.scaffold7185	159849	T	C	TPGENE19231	Unknown	Unknown	Unknown	Unknown	Unknown
Laiwu	LW.scaffold8089	166665	C	T	LWGENE19117	1650	Synonymous	550	T	T
Laiwu	LW.scaffold8089	166677	G	C	LWGENE19117	1638	Synonymous	546	T	T
Laiwu	LW.scaffold8089	166869	C	T	LWGENE19117	1446	Synonymous	482	V	V
Laiwu	TP.scaffold7185	167123	A	G	TPGENE19231	Unknown	Unknown	Unknown	Unknown	Unknown
Laiwu	LW.scaffold8089	167253	C	A	LWGENE19117	1062	Synonymous	354	V	V
Laiwu	LW.scaffold8089	167652	G	T	LWGENE19117	663	Synonymous	221	I	I
Laiwu	LW.scaffold8089	167985	G	A	LWGENE19117	330	Synonymous	110	G	G
Laiwu	HA.scaffold25195	172374	T	C	HAGENE07377	2373	Synonymous	791	D	D
Laiwu	LW.scaffold799.2	202761	G	A	LWGENE19096	558	Synonymous	186	D	D
Laiwu	MS.scaffold51547	212458	C	T	MSGENE16438	573	Synonymous	191	A	A
Laiwu	TP.scaffold7185	222883	T	C	TPGENE19231	Unknown	Unknown	Unknown	Unknown	Unknown
Laiwu	BK.scaffold36945.2	226839	T	C	BKGENE15959	195	Synonymous	65	S	S
Laiwu	TP.scaffold20989	238322	T	C	TPGENE14390	204	Synonymous	68	I	I
Laiwu	TP.scaffold20989	240164	C	T	TPGENE14390	363	Synonymous	121	N	N
Laiwu	BK.scaffold26833	269992	C	T	BKGENE08257	1941	Synonymous	647	A	A
Laiwu	TP.scaffold21254.1	271364	A	G	TPGENE15791	530	Missense	177	N	S
Laiwu	RC.scaffold4911	271774	A	G	RCGENE12596	207	Synonymous	69	P	P
Laiwu	PI.scaffold35141	272022	C	T	PIGENE13205	1143	Synonymous	381	A	A
Laiwu	RC.scaffold4911	272871	C	T	RCGENE12596	318	Synonymous	106	S	S
Laiwu	LA.scaffold25429.1	274005	C	T	LAGENE07341	1083	Synonymous	361	A	A
Laiwu	TP.scaffold19226.1	313878	C	A	TPGENE07646	1350	Synonymous	450	G	G
Laiwu	LW.scaffold24229	394856	G	A	LWGENE06694	Unknown	Unknown	Unknown	Unknown	Unknown
Laiwu	TP.scaffold15730	399703	C	A	TPGENE02284	3486	Missense	1162	E	D
Laiwu	BM.scaffold44925	415549	A	G	BMGENE11811	492	Synonymous	164	E	E
Laiwu	BM.scaffold44925	416350	C	T	BMGENE11811	1293	Synonymous	431	D	D
Laiwu	TP.scaffold15730	425685	A	G	TPGENE02284	2319	Synonymous	773	P	P
Laiwu	LW.scaffold24229	428219	G	T	LWGENE06694	Unknown	Unknown	Unknown	Unknown	Unknown
Laiwu	PI.scaffold24667	429771	T	C	PIGENE06587	1077	Synonymous	359	S	S
Laiwu	HA.scaffold35307.2	466756	C	A	HAGENE16741	1837	Missense	613	P	T
Laiwu	HA.scaffold31481	475121	C	T	HAGENE20165	5725	Missense	1909	R	C
Laiwu	LA.scaffold9703.1	485969	G	A	LAGENE19962	1613	Missense	538	T	I
Laiwu	HA.scaffold35355.1	497666	T	C	HAGENE16899	1824	Synonymous	608	I	I
Laiwu	LW.scaffold12991	521224	A	C	LWGENE01410	146	Missense	49	I	S
Laiwu	HA.scaffold31481	530013	T	G	HAGENE11351	477	Synonymous	159	V	V
Laiwu	BM.scaffold36937.2	530742	C	G	BMGENE08708	1259	Missense	420	T	R
Laiwu	BM.scaffold36937.2	532977	C	T	BMGENE08708	1413	Synonymous	471	N	N
Laiwu	MS.scaffold5849	537097	A	G	MSGENE18478	195	Synonymous	65	S	S
Laiwu	TP.scaffold19715	544477	A	G	TPGENE09090	64	Missense	22	K	E
Laiwu	TP.scaffold19715	548514	C	G	TPGENE09090	1194	Synonymous	398	A	A
Laiwu	MS.scaffold4761	577585	A	G	MSGENE13911	6836	Missense	2279	V	A
Laiwu	MS.scaffold4761	586294	G	A	MSGENE13911	5466	Synonymous	1822	H	H
Laiwu	MS.scaffold4761	591279	T	G	MSGENE13911	4778	Missense	1593	Q	P
Laiwu	LW.scaffold12211	607806	T	C	LWGENE00844	198	Synonymous	66	T	T
Laiwu	JH.scaffold10315	658728	C	T	JHGENE00034	Unknown	Unknown	Unknown	Unknown	Unknown
Laiwu	BK.scaffold15501	707575	C	T	BKGENE02456	2499	Synonymous	833	E	E
Laiwu	TP.scaffold18651.2	731742	G	C	TPGENE06160	1836	Synonymous	612	A	A
Laiwu	MS.scaffold39853	760440	A	G	MSGENE09763	293	Missense	98	H	R
Laiwu	LW.scaffold16017	814128	C	T	LWGENE02797	4813	Missense	1605	V	M
Laiwu	HA.scaffold29073	820901	A	G	HAGENE09754	2360	Missense	787	I	T
Laiwu	BM.scaffold49799	830605	C	T	BMGENE14122	5553	Synonymous	1851	Y	Y
Laiwu	LW.scaffold30983	966297	T	C	LWGENE09928	435	Synonymous	145	E	E
Laiwu	LW.scaffold30983	966432	A	G	LWGENE09928	300	Synonymous	100	T	T
Laiwu	LW.scaffold30983	966458	T	C	LWGENE09928	274	Missense	92	I	V
Laiwu	BK.scaffold21241	993380	C	T	BKGENE05106	1559	Missense	520	P	L
Laiwu	TP.scaffold2033	1032356	C	T	TPGENE20261	1386	Synonymous	462	P	P
Laiwu	TP.scaffold2033	1046355	C	T	TPGENE20261	2067	Synonymous	689	P	P
Laiwu	TP.scaffold2033	1050770	A	C	TPGENE20261	2250	Missense	750	E	D
Laiwu	TP.scaffold20945.2	1103134	G	A	TPGENE14212	177	Synonymous	59	E	E
Laiwu	TP.scaffold20945.2	1103527	C	T	TPGENE14212	570	Synonymous	190	T	T
Laiwu	TP.scaffold20945.2	1103737	G	A	TPGENE14212	780	Synonymous	260	A	A
Laiwu	TP.scaffold20945.2	1103983	A	G	TPGENE14212	1026	Synonymous	342	V	V
Laiwu	TP.scaffold20945.2	1104004	T	C	TPGENE14212	1047	Synonymous	349	P	P
Laiwu	TP.scaffold20945.2	1104022	T	C	TPGENE14212	1065	Synonymous	355	I	I
Laiwu	TP.scaffold20945.2	1104430	G	A	TPGENE14212	1473	Synonymous	491	T	T
Laiwu	BM.scaffold48785.1	1114679	G	A	BMGENE13385	969	Synonymous	323	A	A
Laiwu	BM.scaffold48785.1	1114848	C	T	BMGENE13385	998	Missense	333	P	L
Laiwu	BM.scaffold6823	1304200	A	C	BMGENE19427	406	Synonymous	136	R	R
Laiwu	BM.scaffold6823	1304226	T	C	BMGENE19427	432	Synonymous	144	S	S
Laiwu	TP.scaffold18651.2	1315045	T	C	TPGENE06175	80	Missense	27	N	S
Laiwu	TP.scaffold19759	1322106	C	T	TPGENE09272	Unknown	Unknown	Unknown	Unknown	Unknown
Laiwu	BM.scaffold51867.3	1408953	G	A	BMGENE15513	642	Synonymous	214	P	P
Laiwu	LW.scaffold34121.4	1411048	G	A	LWGENE12149	486	Synonymous	162	P	P
Laiwu	BM.scaffold51867.3	1412469	G	A	BMGENE15513	470	Missense	157	P	L
Laiwu	BM.scaffold51727	1449121	A	G	BMGENE15108	2928	Synonymous	976	P	P
Laiwu	BM.scaffold51727	1449238	T	C	BMGENE15108	3045	Synonymous	1015	Y	Y
Laiwu	LA.scaffold18081.2	1530038	C	T	LAGENE03458	486	Synonymous	162	P	P
Laiwu	LA.scaffold7867	1559243	A	G	LAGENE19442	861	Synonymous	287	T	T
Laiwu	JH.scaffold45547	1794172	T	G	JHGENE17998	718	Missense	240	F	V
Laiwu	BM.scaffold5915	2010892	A	G	BMGENE18709	1047	Synonymous	349	P	P
Laiwu	HA.scaffold33973.1	2084008	C	T	HAGENE13271	3441	Synonymous	1147	S	S
Laiwu	MS.scaffold49161.4	2095769	T	C	MSGENE14559	45	Synonymous	15	A	A
Laiwu	JH.scaffold511	2206677	A	G	JHGENE18553	66	Synonymous	22	C	C
Laiwu	BK.scaffold25927	2285633	G	A	BKGENE07811	1253	Missense	418	A	V
Laiwu	BK.scaffold25927	2285704	C	T	BKGENE07811	1182	Synonymous	394	L	L
Laiwu	BK.scaffold17669	2649663	C	T	BKGENE03305	3441	Synonymous	1147	S	S
Laiwu	LA.scaffold29173	2724853	G	A	LAGENE09256	1277	Missense	426	G	D
Laiwu	LA.scaffold29173	2724862	G	A	LAGENE09256	1286	Missense	429	G	E
Laiwu	RC.scaffold36629	2768942	T	C	RCGENE07580	300	Synonymous	100	R	R
Laiwu	PI.scaffold36923.1	2903470	G	A	PIGENE16859	3423	Synonymous	1141	S	S
Laiwu	HA.scaffold14655.2	2946936	G	A	HAGENE02135	1083	Synonymous	361	A	A
Laiwu	BK.scaffold21591	3555036	G	A	BKGENE05309	Unknown	Unknown	Unknown	Unknown	Unknown
Laiwu	BK.scaffold21241	3659747	G	A	BKGENE05128	642	Synonymous	214	P	P
Laiwu	BK.scaffold21241	3663263	G	A	BKGENE05128	470	Missense	157	P	L
Laiwu	PI.scaffold12677	3675110	G	A	PIGENE20376	1014	Synonymous	338	P	P
Laiwu	PI.scaffold12677	3678625	G	A	PIGENE20376	842	Missense	281	P	L
Laiwu	RC.scaffold51191.2	4432209	G	A	RCGENE13434	369	Synonymous	123	D	D
Laiwu	LW.scaffold31005	4637728	C	G	LWGENE10012	98	Missense	33	A	G
Laiwu	RC.scaffold44959	5244271	C	T	RCGENE10869	198	Synonymous	66	G	G
Laiwu	LW.scaffold5907	5766237	G	C	LWGENE17879	45	Synonymous	15	A	A
Laiwu	LW.scaffold36139.2	6854659	G	C	LWGENE13362	2074	Missense	692	P	A
Laiwu	LW.scaffold36843	8902095	G	A	LWGENE14016	1455	Synonymous	485	A	A
Luchuan	RC.scaffold611245	861	C	T	RCGENE18119	288	Synonymous	96	A	A
Luchuan	MS.scaffold688669	1119	C	T	MSGENE19242	264	Synonymous	88	H	H
Luchuan	LA.scaffold11291	1155	G	A	LAGENE00414	759	Synonymous	253	S	S
Luchuan	RC.scaffold24507	5908	G	A	RCGENE04349	288	Synonymous	96	A	A
Luchuan	TP.scaffold5286.1	6299	C	T	TPGENE18461	Unknown	Unknown	Unknown	Unknown	Unknown
Luchuan	LA.scaffold1509.2	9777	G	C	LAGENE02135	1236	Synonymous	412	S	S
Luchuan	TP.scaffold18977	9957	G	A	TPGENE20343	288	Synonymous	96	A	A
Luchuan	TP.scaffold19974	21518	C	T	TPGENE10162	Unknown	Unknown	Unknown	Unknown	Unknown
Luchuan	BM.scaffold36595	24169	T	C	BMGENE08591	72	Synonymous	24	G	G
Luchuan	BM.scaffold15107	28959	G	A	BMGENE01318	5556	Synonymous	1852	T	T
Luchuan	TP.scaffold17638	30494	C	T	TPGENE04310	155	Missense	52	G	E
Luchuan	RC.scaffold37233	34444	G	A	RCGENE07779	1527	Synonymous	509	A	A
Luchuan	PI.scaffold37005	38255	C	T	PIGENE20722	1212	Synonymous	404	L	L
Luchuan	LA.scaffold39487	38458	C	T	LAGENE17552	1212	Synonymous	404	L	L
Luchuan	MS.scaffold52231	38596	C	T	MSGENE17388	216	Synonymous	72	P	P
Luchuan	PI.scaffold37005	40837	A	T	PIGENE20722	256	Missense	86	S	T
Luchuan	LA.scaffold39487	41040	A	T	LAGENE17552	256	Missense	86	S	T
Luchuan	MS.scaffold28329	55518	C	T	MSGENE20330	288	Synonymous	96	A	A
Luchuan	BK.scaffold33061	56873	C	T	BKGENE20323	288	Synonymous	96	A	A
Luchuan	JH.scaffold8107	57046	C	T	JHGENE20321	288	Synonymous	96	A	A
Luchuan	TP.scaffold19151	69317	G	A	TPGENE07488	3731	Missense	1244	T	M
Luchuan	TP.scaffold19151	76916	C	T	TPGENE07488	3103	Missense	1035	E	K
Luchuan	BM.scaffold15107	81110	G	A	BMGENE01318	4122	Synonymous	1374	V	V
Luchuan	TP.scaffold19151	87844	C	G	TPGENE07488	2992	Missense	998	A	P
Luchuan	LW.scaffold38009	104568	T	C	LWGENE16435	89	Missense	30	L	P
Luchuan	LW.scaffold38009	104624	T	C	LWGENE16435	145	Missense	49	W	R
Luchuan	LA.scaffold21967	107548	A	G	LAGENE05412	570	Synonymous	190	F	F
Luchuan	LW.scaffold38009	108605	C	G	LWGENE16435	618	Synonymous	206	S	S
Luchuan	LW.scaffold38009	111996	C	A	LWGENE16435	1048	Missense	350	L	M
Luchuan	TP.scaffold19151	112641	G	A	TPGENE07488	2241	Synonymous	747	Y	Y
Luchuan	BM.scaffold2255	116285	T	C	BMGENE03776	4647	Synonymous	1549	T	T
Luchuan	LW.scaffold38009	117807	C	T	LWGENE16435	2502	Synonymous	834	A	A
Luchuan	LW.scaffold38009	120368	C	T	LWGENE16435	3474	Synonymous	1158	H	H
Luchuan	BM.scaffold20461	125412	C	T	BMGENE03092	4140	Synonymous	1380	Y	Y
Luchuan	LW.scaffold38009	127283	T	C	LWGENE16435	6437	Missense	2146	L	P
Luchuan	MS.scaffold6447	128380	C	T	MSGENE18718	3945	Synonymous	1315	Y	Y
Luchuan	LW.scaffold38009	135677	G	A	LWGENE16435	8046	Synonymous	2682	L	L
Luchuan	TP.scaffold661	139503	G	A	TPGENE19023	1368	Synonymous	456	P	P
Luchuan	TP.scaffold20257	142932	C	T	TPGENE11243	3300	Synonymous	1100	L	L
Luchuan	BM.scaffold20461	149981	G	C	BMGENE03092	4891	Missense	1631	A	P
Luchuan	JH.scaffold41997	152709	A	G	JHGENE12924	846	Synonymous	282	S	S
Luchuan	MS.scaffold6447	152985	G	C	MSGENE18718	4696	Missense	1566	A	P
Luchuan	HA.scaffold25195	155146	G	C	HAGENE07377	758	Missense	253	R	T
Luchuan	TP.scaffold21538	157612	T	C	TPGENE16867	1362	Synonymous	454	P	P
Luchuan	BM.scaffold20461	159613	G	A	BMGENE03092	5002	Missense	1668	E	K
Luchuan	BM.scaffold20461	166644	C	T	BMGENE03092	5630	Missense	1877	T	M
Luchuan	HA.scaffold25195	174760	G	A	HAGENE07377	2658	Synonymous	886	T	T
Luchuan	HA.scaffold25195	178978	C	T	HAGENE07377	2948	Missense	983	P	L
Luchuan	TP.scaffold16316.1	183388	G	A	TPGENE02921	1248	Synonymous	416	A	A
Luchuan	TP.scaffold3564	201000	G	A	TPGENE17752	2136	Synonymous	712	T	T
Luchuan	RC.scaffold13031	225368	T	C	RCGENE01218	4797	Synonymous	1599	T	T
Luchuan	BK.scaffold30915.2	228829	G	A	BKGENE10613	Unknown	Unknown	Unknown	Unknown	Unknown
Luchuan	MS.scaffold48763	230002	T	C	MSGENE14310	4797	Synonymous	1599	T	T
Luchuan	LA.scaffold29315.2	233804	T	C	LAGENE09411	4647	Synonymous	1549	T	T
Luchuan	TP.scaffold20466	235549	T	C	TPGENE12202	4647	Synonymous	1549	T	T
Luchuan	BK.scaffold30915.2	235835	C	T	BKGENE10613	Unknown	Unknown	Unknown	Unknown	Unknown
Luchuan	BK.scaffold30915.2	245797	C	G	BKGENE10613	Unknown	Unknown	Unknown	Unknown	Unknown
Luchuan	BK.scaffold30915.2	269945	G	A	BKGENE10613	Unknown	Unknown	Unknown	Unknown	Unknown
Luchuan	JH.scaffold44695	282826	C	G	JHGENE15518	892	Missense	298	A	P
Luchuan	JH.scaffold44695	283754	C	T	JHGENE15518	719	Missense	240	R	Q
Luchuan	JH.scaffold44695	283787	T	A	JHGENE15518	686	Missense	229	E	V
Luchuan	TP.scaffold20315	378892	G	A	TPGENE11521	207	Synonymous	69	P	P
Luchuan	TP.scaffold20315	381838	A	G	TPGENE11521	154	Synonymous	52	L	L
Luchuan	LW.scaffold12863.2	476435	C	T	LWGENE01325	1032	Synonymous	344	S	S
Luchuan	BK.scaffold26833	491629	G	A	BKGENE08267	795	Synonymous	265	T	T
Luchuan	BK.scaffold26833	491632	C	T	BKGENE08267	798	Synonymous	266	P	P
Luchuan	LW.scaffold10791	500544	C	T	LWGENE00253	Unknown	Unknown	Unknown	Unknown	Unknown
Luchuan	JH.scaffold33309	507459	G	A	JHGENE08489	216	Synonymous	72	P	P
Luchuan	BM.scaffold41297	507606	G	A	BMGENE10653	216	Synonymous	72	P	P
Luchuan	LW.scaffold12991	521224	A	C	LWGENE01410	146	Missense	49	I	S
Luchuan	TP.scaffold20257	554896	T	C	TPGENE11264	3315	Synonymous	1105	P	P
Luchuan	MS.scaffold4761	577585	A	G	MSGENE13911	6836	Missense	2279	V	A
Luchuan	BM.scaffold45505	580249	A	G	BMGENE12178	534	Synonymous	178	A	A
Luchuan	BM.scaffold45505	580264	T	C	BMGENE12178	519	Synonymous	173	T	T
Luchuan	BM.scaffold45505	580312	G	A	BMGENE12178	471	Synonymous	157	P	P
Luchuan	MS.scaffold5849	582151	G	C	MSGENE18479	3549	Missense	1183	H	Q
Luchuan	JH.scaffold41625	630202	G	T	JHGENE12509	518	Missense	173	G	V
Luchuan	LW.scaffold14181	655930	A	C	LWGENE01985	1298	Missense	433	Q	P
Luchuan	MS.scaffold32923	667312	T	C	MSGENE07504	553	Missense	185	S	P
Luchuan	LA.scaffold11175.1	671779	C	A	LAGENE00343	1455	Synonymous	485	S	S
Luchuan	JH.scaffold44031	672467	G	A	JHGENE14421	236	Missense	79	S	F
Luchuan	LA.scaffold11175.1	673204	C	T	LAGENE00343	2880	Synonymous	960	I	I
Luchuan	LA.scaffold11175.1	690542	T	C	LAGENE00343	7578	Synonymous	2526	P	P
Luchuan	TP.scaffold4528	740478	G	A	TPGENE18114	1779	Synonymous	593	C	C
Luchuan	TP.scaffold12096	787729	G	C	TPGENE00781	1383	Synonymous	461	S	S
Luchuan	LA.scaffold25429.2	864355	C	G	LAGENE07371	3207	Synonymous	1069	P	P
Luchuan	MS.scaffold17929	964084	G	A	MSGENE02729	708	Synonymous	236	P	P
Luchuan	MS.scaffold4761	1007894	A	G	MSGENE13934	4431	Synonymous	1477	S	S
Luchuan	MS.scaffold4761	1008083	G	C	MSGENE13934	4242	Synonymous	1414	A	A
Luchuan	MS.scaffold4761	1010602	T	C	MSGENE13934	2790	Synonymous	930	P	P
Luchuan	BM.scaffold38317	1056881	C	G	BMGENE09203	813	Synonymous	271	T	T
Luchuan	BM.scaffold38317	1056888	G	A	BMGENE09203	806	Missense	269	A	V
Luchuan	TP.scaffold21089	1114395	T	C	TPGENE14959	933	Synonymous	311	Y	Y
Luchuan	LW.scaffold36305	1160523	T	C	LWGENE13477	1486	Missense	496	S	P
Luchuan	LW.scaffold29805	2072584	A	G	LWGENE09323	4797	Synonymous	1599	T	T
Luchuan	JH.scaffold511	2206677	A	G	JHGENE18553	66	Synonymous	22	C	C
Luchuan	BK.scaffold25927	2285586	C	T	BKGENE07811	1300	Missense	434	A	T
Luchuan	BK.scaffold25927	2285633	G	A	BKGENE07811	1253	Missense	418	A	V
Luchuan	BK.scaffold25927	2285704	C	T	BKGENE07811	1182	Synonymous	394	L	L
Luchuan	RC.scaffold49837	2431381	C	T	RCGENE12923	144	Synonymous	48	S	S
Luchuan	JH.scaffold511	2463924	G	A	JHGENE18558	2883	Synonymous	961	E	E
Luchuan	BM.scaffold489.1	2478874	C	A	BMGENE13617	21	Missense	7	E	D
Luchuan	JH.scaffold23741	2835032	G	A	JHGENE05145	369	Synonymous	123	L	L
Min	RC.scaffold5489.2	1112929	G	C	RCGENE17759	1733	Missense	578	S	C
Min	RC.scaffold5489.2	1112966	T	G	RCGENE17759	1696	Missense	566	N	H
Min	TP.scaffold161734	627	A	T	TPGENE02752	738	Synonymous	246	A	A
Min	TP.scaffold161734	1104	A	G	TPGENE02752	261	Synonymous	87	Y	Y
Min	TP.scaffold161734	1151	T	C	TPGENE02752	214	Missense	72	I	V
Min	TP.scaffold161734	1167	A	G	TPGENE02752	198	Synonymous	66	D	D
Min	TP.scaffold161734	1289	T	C	TPGENE02752	76	Missense	26	S	G
Min	BK.scaffold11569	1819	A	G	BKGENE00500	564	Synonymous	188	A	A
Min	BM.scaffold34389	3079	T	G	BMGENE20623	313	Missense	105	Y	D
Min	BM.scaffold640274	3122	G	C	BMGENE19208	Unknown	Unknown	Unknown	Unknown	Unknown
Min	MS.scaffold1943	3154	T	G	MSGENE20460	313	Missense	105	Y	D
Min	PI.scaffold11085	3167	T	G	PIGENE00329	316	Missense	106	Y	D
Min	PI.scaffold11085	3210	G	A	PIGENE00329	359	Missense	120	C	Y
Min	RC.scaffold20493	3360	T	G	RCGENE03322	316	Missense	106	Y	D
Min	RC.scaffold20493	3403	G	A	RCGENE03322	359	Missense	120	C	Y
Min	LA.scaffold38815.5	3780	G	A	LAGENE15777	Unknown	Unknown	Unknown	Unknown	Unknown
Min	HA.scaffold26709.1	4176	T	G	HAGENE20267	313	Missense	105	Y	D
Min	PI.scaffold441899	4353	A	G	PIGENE17887	2211	Synonymous	737	S	S
Min	TP.scaffold5286.1	6299	C	T	TPGENE18461	Unknown	Unknown	Unknown	Unknown	Unknown
Min	TP.scaffold18595	8853	A	C	TPGENE06002	316	Missense	106	Y	D
Min	PI.scaffold35237.1	9532	G	A	PIGENE13456	1028	Missense	343	R	H
Min	TP.scaffold20773.2	11597	G	T	TPGENE13325	Unknown	Unknown	Unknown	Unknown	Unknown
Min	RC.scaffold24507	20143	G	C	RCGENE04349	1881	Missense	627	E	D
Min	LA.scaffold38905	55800	A	G	LAGENE20277	874	Missense	292	W	R
Min	LA.scaffold38905	55974	C	T	LAGENE20277	800	Missense	267	R	K
Min	LA.scaffold38905	55979	G	A	LAGENE20277	795	Synonymous	265	S	S
Min	LA.scaffold38905	56049	T	C	LAGENE20277	725	Missense	242	D	G
Min	LA.scaffold38905	56232	T	C	LAGENE20277	542	Missense	181	Y	C
Min	LA.scaffold38905	56513	C	G	LAGENE20277	261	Synonymous	87	L	L
Min	JH.scaffold44547	63645	C	T	JHGENE15263	704	Missense	235	P	L
Min	LA.scaffold38905	69487	C	T	LAGENE20277	167	Missense	56	R	H
Min	LA.scaffold38905	69629	C	T	LAGENE20277	25	Missense	9	A	T
Min	LW.scaffold30983	70633	A	G	LWGENE09925	270	Synonymous	90	H	H
Min	TP.scaffold20182	70891	A	G	TPGENE10897	1215	Synonymous	405	T	T
Min	TP.scaffold21538	88684	G	A	TPGENE16864	651	Synonymous	217	Y	Y
Min	TP.scaffold17266	99296	A	G	TPGENE03832	Unknown	Unknown	Unknown	Unknown	Unknown
Min	TP.scaffold21538	148079	C	T	TPGENE16866	3632	Missense	1211	T	M
Min	BM.scaffold48167	154714	G	A	BMGENE13174	98	Missense	33	C	Y
Min	HA.scaffold25195	155146	G	C	HAGENE07377	758	Missense	253	R	T
Min	BM.scaffold48167	158732	A	G	BMGENE13174	191	Missense	64	N	S
Min	TP.scaffold21538	159052	A	G	TPGENE16867	2065	Missense	689	I	V
Min	TP.scaffold21538	161564	G	A	TPGENE16867	2744	Missense	915	R	Q
Min	TP.scaffold21538	163084	G	A	TPGENE16867	3066	Synonymous	1022	L	L
Min	BM.scaffold48167	163631	G	A	BMGENE13174	615	Synonymous	205	V	V
Min	LW.scaffold8089	166665	C	T	LWGENE19117	1650	Synonymous	550	T	T
Min	LW.scaffold8089	166677	G	C	LWGENE19117	1638	Synonymous	546	T	T
Min	LW.scaffold8089	166869	C	T	LWGENE19117	1446	Synonymous	482	V	V
Min	LW.scaffold8089	167253	C	A	LWGENE19117	1062	Synonymous	354	V	V
Min	LW.scaffold8089	167652	G	T	LWGENE19117	663	Synonymous	221	I	I
Min	LW.scaffold8089	167985	G	A	LWGENE19117	330	Synonymous	110	G	G
Min	LW.scaffold799.2	202761	G	A	LWGENE19096	558	Synonymous	186	D	D
Min	TP.scaffold20989	238322	T	C	TPGENE14390	204	Synonymous	68	I	I
Min	HA.scaffold27963	258336	C	T	HAGENE09148	Unknown	Unknown	Unknown	Unknown	Unknown
Min	JH.scaffold45173	337190	A	G	JHGENE16797	5417	Missense	1806	V	A
Min	BM.scaffold26369	339587	A	G	BMGENE05061	5417	Missense	1806	V	A
Min	TP.scaffold19633	364799	C	T	TPGENE20350	Unknown	Unknown	Unknown	Unknown	Unknown
Min	BK.scaffold33873	464589	C	T	BKGENE12132	908	Missense	303	R	Q
Min	BK.scaffold33873	464911	C	T	BKGENE12132	691	Missense	231	D	N
Min	HA.scaffold35355.1	466702	A	G	HAGENE16899	513	Synonymous	171	Q	Q
Min	LW.scaffold12991	521224	A	C	LWGENE01410	146	Missense	49	I	S
Min	TP.scaffold19715	544477	A	G	TPGENE09090	64	Missense	22	K	E
Min	BM.scaffold45505	580249	A	G	BMGENE12178	534	Synonymous	178	A	A
Min	BM.scaffold45505	580264	T	C	BMGENE12178	519	Synonymous	173	T	T
Min	BM.scaffold45505	580312	G	A	BMGENE12178	471	Synonymous	157	P	P
Min	LA.scaffold7867	688832	G	T	LAGENE19423	21	Synonymous	7	I	I
Min	BM.scaffold49799	810880	C	T	BMGENE14122	4500	Synonymous	1500	P	P
Min	LA.scaffold25429.2	885064	A	G	LAGENE07371	10491	Synonymous	3497	S	S
Min	LW.scaffold30983	966297	T	C	LWGENE09928	435	Synonymous	145	E	E
Min	LW.scaffold30983	966328	G	A	LWGENE09928	404	Missense	135	A	V
Min	LW.scaffold30983	966432	A	G	LWGENE09928	300	Synonymous	100	T	T
Min	TP.scaffold6369	1019552	C	T	TPGENE18957	457	Missense	153	G	S
Min	BM.scaffold38317	1056881	C	G	BMGENE09203	813	Synonymous	271	T	T
Min	BM.scaffold38317	1056888	G	A	BMGENE09203	806	Missense	269	A	V
Min	LA.scaffold20523	1084312	G	A	LAGENE04719	342	Synonymous	114	T	T
Min	BM.scaffold52865	1571489	G	T	BMGENE16943	1810	Missense	604	A	S
Min	BM.scaffold47547	1902893	C	T	BMGENE12997	342	Synonymous	114	T	T
Min	BM.scaffold5915	2008534	C	T	BMGENE18709	856	Missense	286	R	C
Min	BM.scaffold5915	2010892	A	G	BMGENE18709	1047	Synonymous	349	P	P
Min	MS.scaffold49161.4	2116530	G	A	MSGENE14559	5334	Synonymous	1778	A	A
Min	JH.scaffold511	2206677	A	G	JHGENE18553	66	Synonymous	22	C	C
Min	RC.scaffold49837	2445843	A	G	RCGENE12924	611	Missense	204	V	A
Min	BM.scaffold489.1	2478874	C	A	BMGENE13617	21	Missense	7	E	D
Min	LA.scaffold29173	2724853	G	A	LAGENE09256	1277	Missense	426	G	D
Min	RC.scaffold36629	2768942	T	C	RCGENE07580	300	Synonymous	100	R	R
Min	PI.scaffold36923.1	2949754	C	T	PIGENE16860	2343	Synonymous	781	A	A
Min	HA.scaffold27057	4041711	A	G	HAGENE08341	2076	Synonymous	692	G	G
Min	HA.scaffold27057	4044286	C	G	HAGENE08341	1680	Synonymous	560	P	P
Min	LW.scaffold31005	4637728	C	G	LWGENE10012	98	Missense	33	A	G
Wuzhishan	MS.scaffold688343	243	C	T	MSGENE19228	120	Synonymous	40	Y	Y
Wuzhishan	LA.scaffold464995	546	A	G	LAGENE18090	Unknown	Unknown	Unknown	Unknown	Unknown
Wuzhishan	PI.scaffold441899	4353	A	G	PIGENE17887	2211	Synonymous	737	S	S
Wuzhishan	TP.scaffold5286.1	6299	C	T	TPGENE18461	Unknown	Unknown	Unknown	Unknown	Unknown
Wuzhishan	JH.scaffold31749	19420	C	T	JHGENE07803	Unknown	Unknown	Unknown	Unknown	Unknown
Wuzhishan	JH.scaffold31749	21167	C	T	JHGENE07803	Unknown	Unknown	Unknown	Unknown	Unknown
Wuzhishan	TP.scaffold19974	21518	C	T	TPGENE10162	Unknown	Unknown	Unknown	Unknown	Unknown
Wuzhishan	TP.scaffold19524	24136	G	A	TPGENE08502	774	Synonymous	258	Y	Y
Wuzhishan	TP.scaffold17638	30494	C	T	TPGENE04310	155	Missense	52	G	E
Wuzhishan	TP.scaffold15866	36053	G	A	TPGENE02430	710	Missense	237	A	V
Wuzhishan	MS.scaffold52231	38596	C	T	MSGENE17388	216	Synonymous	72	P	P
Wuzhishan	TP.scaffold19942	45141	G	A	TPGENE10003	660	Synonymous	220	V	V
Wuzhishan	BM.scaffold43859	67516	G	A	BMGENE11485	2183	Missense	728	R	K
Wuzhishan	BM.scaffold43859	67520	G	A	BMGENE11485	2187	Synonymous	729	T	T
Wuzhishan	BM.scaffold20461	69118	C	T	BMGENE03092	1493	Missense	498	S	L
Wuzhishan	MS.scaffold6447	71984	C	T	MSGENE18718	1493	Missense	498	S	L
Wuzhishan	HA.scaffold32249	73714	T	C	HAGENE11814	375	stoploss	125	X	W
Wuzhishan	TP.scaffold21521	75543	G	C	TPGENE16826	753	Missense	251	I	M
Wuzhishan	TP.scaffold17266	99215	C	T	TPGENE03832	Unknown	Unknown	Unknown	Unknown	Unknown
Wuzhishan	TP.scaffold17266	99296	A	G	TPGENE03832	Unknown	Unknown	Unknown	Unknown	Unknown
Wuzhishan	PI.scaffold21343.2	102311	G	A	PIGENE20463	774	Synonymous	258	Y	Y
Wuzhishan	LW.scaffold38009	104624	T	C	LWGENE16435	145	Missense	49	W	R
Wuzhishan	TP.scaffold19151	112641	G	A	TPGENE07488	2241	Synonymous	747	Y	Y
Wuzhishan	HA.scaffold23553.1	122643	T	C	HAGENE05976	750	Synonymous	250	L	L
Wuzhishan	BM.scaffold20461	125412	C	T	BMGENE03092	4140	Synonymous	1380	Y	Y
Wuzhishan	MS.scaffold6447	128380	C	T	MSGENE18718	3945	Synonymous	1315	Y	Y
Wuzhishan	LW.scaffold36769	128736	C	T	LWGENE13829	15	Synonymous	5	G	G
Wuzhishan	LW.scaffold36769	128787	A	G	LWGENE13829	66	Synonymous	22	T	T
Wuzhishan	TP.scaffold661	139503	G	A	TPGENE19023	1368	Synonymous	456	P	P
Wuzhishan	JH.scaffold41997	152709	A	G	JHGENE12924	846	Synonymous	282	S	S
Wuzhishan	BM.scaffold48167	154714	G	A	BMGENE13174	98	Missense	33	C	Y
Wuzhishan	BM.scaffold48167	158732	A	G	BMGENE13174	191	Missense	64	N	S
Wuzhishan	BM.scaffold48167	163631	G	A	BMGENE13174	615	Synonymous	205	V	V
Wuzhishan	BM.scaffold15421.1	167490	T	C	BMGENE01383	63	Synonymous	21	P	P
Wuzhishan	TP.scaffold19151	170160	G	A	TPGENE07488	8	Missense	3	S	L
Wuzhishan	LW.scaffold799.2	202761	G	A	LWGENE19096	558	Synonymous	186	D	D
Wuzhishan	RC.scaffold40591	204171	T	G	RCGENE09219	189	Synonymous	63	A	A
Wuzhishan	RC.scaffold40591	204290	A	G	RCGENE09219	308	Missense	103	E	G
Wuzhishan	TP.scaffold20989	238322	T	C	TPGENE14390	204	Synonymous	68	I	I
Wuzhishan	BK.scaffold30915.2	269945	G	A	BKGENE10613	Unknown	Unknown	Unknown	Unknown	Unknown
Wuzhishan	LA.scaffold36289.2	301320	C	T	LAGENE13073	7215	Synonymous	2405	E	E
Wuzhishan	TP.scaffold4409	302937	A	G	TPGENE18085	3258	Synonymous	1086	S	S
Wuzhishan	LA.scaffold36289.2	311738	C	A	LAGENE13073	5439	Synonymous	1813	L	L
Wuzhishan	TP.scaffold19790.3	318118	G	T	TPGENE09400	380	Missense	127	G	V
Wuzhishan	BK.scaffold30915.2	326691	G	A	BKGENE10613	Unknown	Unknown	Unknown	Unknown	Unknown
Wuzhishan	LA.scaffold25765.2	337418	A	G	LAGENE07592	2305	Missense	769	S	G
Wuzhishan	JH.scaffold20949	344684	T	C	JHGENE04023	114	Synonymous	38	R	R
Wuzhishan	HA.scaffold25165	351091	A	G	HAGENE07363	3062	Missense	1021	Q	R
Wuzhishan	TP.scaffold20315	363700	T	C	TPGENE11521	987	Synonymous	329	S	S
Wuzhishan	MS.scaffold27273	382113	G	A	MSGENE05865	6432	Synonymous	2144	G	G
Wuzhishan	MS.scaffold52001.2	419399	A	G	MSGENE17081	13	Missense	5	S	G
Wuzhishan	BK.scaffold30915.2	432270	A	G	BKGENE10613	Unknown	Unknown	Unknown	Unknown	Unknown
Wuzhishan	JH.scaffold29117	435552	T	C	JHGENE06948	570	Synonymous	190	Y	Y
Wuzhishan	BM.scaffold22657	454269	T	C	BMGENE03833	1428	Synonymous	476	Y	Y
Wuzhishan	BK.scaffold33873	464685	C	T	BKGENE12132	812	Missense	271	R	H
Wuzhishan	TP.scaffold21297.2	466868	G	C	TPGENE16038	894	Synonymous	298	R	R
Wuzhishan	HA.scaffold31481	475121	C	T	HAGENE20165	5725	Missense	1909	R	C
Wuzhishan	LW.scaffold12863.2	476240	C	T	LWGENE01325	837	Synonymous	279	S	S
Wuzhishan	LW.scaffold12863.2	476435	C	T	LWGENE01325	1032	Synonymous	344	S	S
Wuzhishan	TP.scaffold21297.2	485205	C	A	TPGENE16038	53	Missense	18	R	L
Wuzhishan	JH.scaffold33309	507459	G	A	JHGENE08489	216	Synonymous	72	P	P
Wuzhishan	BM.scaffold41297	507606	G	A	BMGENE10653	216	Synonymous	72	P	P
Wuzhishan	LA.scaffold1713	533253	C	T	LAGENE03127	942	Synonymous	314	I	I
Wuzhishan	LA.scaffold1713	533380	G	A	LAGENE03127	1069	Missense	357	E	K
Wuzhishan	LA.scaffold1713	533727	C	T	LAGENE03127	1416	Synonymous	472	S	S
Wuzhishan	LA.scaffold1713	533832	G	A	LAGENE03127	1521	Synonymous	507	E	E
Wuzhishan	JH.scaffold41933.2	541854	T	C	JHGENE12888	716	Missense	239	H	R
Wuzhishan	TP.scaffold20257	554896	T	C	TPGENE11264	3315	Synonymous	1105	P	P
Wuzhishan	MS.scaffold4761	577585	A	G	MSGENE13911	6836	Missense	2279	V	A
Wuzhishan	BM.scaffold45505	580249	A	G	BMGENE12178	534	Synonymous	178	A	A
Wuzhishan	BM.scaffold45505	580264	T	C	BMGENE12178	519	Synonymous	173	T	T
Wuzhishan	BM.scaffold45505	580312	G	A	BMGENE12178	471	Synonymous	157	P	P
Wuzhishan	MS.scaffold4761	591279	T	G	MSGENE13911	4778	Missense	1593	Q	P
Wuzhishan	TP.scaffold20257	612502	G	C	TPGENE11267	228	Synonymous	76	L	L
Wuzhishan	TP.scaffold20257	614259	C	T	TPGENE11267	969	Synonymous	323	P	P
Wuzhishan	JH.scaffold41625	630202	G	T	JHGENE12509	518	Missense	173	G	V
Wuzhishan	JH.scaffold41625	630221	A	T	JHGENE12509	537	Synonymous	179	L	L
Wuzhishan	LW.scaffold14181	655930	A	C	LWGENE01985	1298	Missense	433	Q	P
Wuzhishan	JH.scaffold3303.1	669358	T	G	JHGENE08319	67	Missense	23	I	L
Wuzhishan	JH.scaffold10315	677813	C	T	JHGENE00034	Unknown	Unknown	Unknown	Unknown	Unknown
Wuzhishan	JH.scaffold10315	677846	G	C	JHGENE00034	Unknown	Unknown	Unknown	Unknown	Unknown
Wuzhishan	MS.scaffold32923	680146	A	C	MSGENE07504	1596	Synonymous	532	R	R
Wuzhishan	BK.scaffold3255	715659	T	G	BKGENE11421	501	Synonymous	167	S	S
Wuzhishan	BK.scaffold3255	715805	G	A	BKGENE11421	647	Missense	216	R	Q
Wuzhishan	TP.scaffold18651.2	731616	C	T	TPGENE06160	1962	Synonymous	654	E	E
Wuzhishan	LA.scaffold25429.2	864355	C	G	LAGENE07371	3207	Synonymous	1069	P	P
Wuzhishan	HA.scaffold16511.3	869460	C	T	HAGENE02714	1008	Synonymous	336	A	A
Wuzhishan	PI.scaffold29477.1	873442	T	C	PIGENE09149	716	Missense	239	H	R
Wuzhishan	BK.scaffold21809.2	873919	T	C	BKGENE05671	716	Missense	239	H	R
Wuzhishan	MS.scaffold41495.1	880973	A	G	MSGENE10503	716	Missense	239	H	R
Wuzhishan	LA.scaffold25429.2	885064	A	G	LAGENE07371	10491	Synonymous	3497	S	S
Wuzhishan	TP.scaffold18651.2	913723	G	C	TPGENE06167	1188	Synonymous	396	V	V
Wuzhishan	TP.scaffold20727	915748	A	G	TPGENE13197	1352	Missense	451	L	P
Wuzhishan	TP.scaffold18651.2	915910	G	A	TPGENE06167	990	Synonymous	330	D	D
Wuzhishan	LA.scaffold3603	919007	G	T	LAGENE12799	1428	Synonymous	476	S	S
Wuzhishan	PI.scaffold24869.1	924491	C	T	PIGENE06689	438	Synonymous	146	A	A
Wuzhishan	PI.scaffold27481	941632	C	T	PIGENE08272	786	Synonymous	262	S	S
Wuzhishan	BM.scaffold33125.3	978020	C	T	BMGENE07313	444	Synonymous	148	S	S
Wuzhishan	BM.scaffold33125.3	978236	T	C	BMGENE07313	228	Synonymous	76	E	E
Wuzhishan	MS.scaffold4761	1007894	A	G	MSGENE13934	4431	Synonymous	1477	S	S
Wuzhishan	MS.scaffold4761	1008083	G	C	MSGENE13934	4242	Synonymous	1414	A	A
Wuzhishan	LA.scaffold22347.5	1010055	C	G	LAGENE05774	964	Missense	322	A	P
Wuzhishan	LA.scaffold22347.5	1010127	T	C	LAGENE05774	892	Missense	298	S	G
Wuzhishan	MS.scaffold4761	1010602	T	C	MSGENE13934	2790	Synonymous	930	P	P
Wuzhishan	TP.scaffold16316.1	1043530	T	C	TPGENE02947	528	Synonymous	176	L	L
Wuzhishan	BM.scaffold38317	1056881	C	G	BMGENE09203	813	Synonymous	271	T	T
Wuzhishan	BM.scaffold38317	1056888	G	A	BMGENE09203	806	Missense	269	A	V
Wuzhishan	BM.scaffold38317	1056894	T	C	BMGENE09203	800	Missense	267	N	S
Wuzhishan	JH.scaffold45291	1113024	A	C	JHGENE17178	1236	Synonymous	412	R	R
Wuzhishan	LW.scaffold37575.7	1152921	T	C	LWGENE15246	1692	Synonymous	564	V	V
Wuzhishan	LW.scaffold36305	1173331	A	C	LWGENE13477	2529	Synonymous	843	R	R
Wuzhishan	PI.scaffold27481	1173815	C	T	PIGENE08288	156	Synonymous	52	D	D
Wuzhishan	PI.scaffold27481	1174346	C	T	PIGENE08288	252	Synonymous	84	Y	Y
Wuzhishan	LW.scaffold12835.2	1200404	C	T	LWGENE01246	279	Synonymous	93	N	N
Wuzhishan	TP.scaffold18651.2	1294334	C	G	TPGENE06175	1335	Synonymous	445	G	G
Wuzhishan	TP.scaffold18651.2	1299298	C	T	TPGENE06175	933	Synonymous	311	P	P
Wuzhishan	TP.scaffold21661	1573570	A	C	TPGENE17306	67	Missense	23	I	L
Wuzhishan	HA.scaffold34643.1	1686698	A	C	HAGENE20310	189	Synonymous	63	A	A
Wuzhishan	JH.scaffold21927	1808421	G	A	JHGENE04533	870	Synonymous	290	Q	Q
Wuzhishan	JH.scaffold21927	1808481	C	G	JHGENE04533	930	Synonymous	310	P	P
Wuzhishan	BM.scaffold5915	2010892	A	G	BMGENE18709	1047	Synonymous	349	P	P
Wuzhishan	JH.scaffold44755	2199684	T	C	JHGENE15681	138	Synonymous	46	A	A
Wuzhishan	LW.scaffold18253.6	2989904	G	A	LWGENE03889	170	Missense	57	G	E
Wuzhishan	LW.scaffold18253.6	2990514	C	T	LWGENE03889	780	Synonymous	260	L	L
Wuzhishan	LW.scaffold37831.1	3178207	G	A	LWGENE15682	1035	Synonymous	345	Q	Q
Wuzhishan	LW.scaffold37831.1	3178226	G	A	LWGENE15682	1054	Missense	352	A	T
Wuzhishan	LW.scaffold37831.1	3178501	C	T	LWGENE15682	1329	Synonymous	443	G	G
